# Supplementary material
Source: MDPI journal article supplement (https://www.mdpi.com/2304-6740/10/10/151)

```
R(reflections)= 0.0246( 5174)      wR2(reflections)=
S = 1.074                        0.0578( 5530)
Npar= 307
```

---

The following ALERTS were generated. Each ALERT has the format

**test-name\_ALERT\_alert-type\_alert-level.**

Click on the hyperlinks for more details of the test.

---

### Alert level A

PLAT431\_ALERT\_2\_A Short Inter HL..A Contact I4 ..02 . 2.99 Ang.  
3/2-x,-1/2+y,1/2-z = 2\_645 Check

---

### Alert level B

PLAT230\_ALERT\_2\_B Hirshfeld Test Diff for N1 --C9 . 17.2 s.u.

---

### Alert level C

ABSTY02\_ALERT\_1\_C An \_exptl\_absorpt\_correction\_type has been given without  
a literature citation. This should be contained in the  
\_exptl\_absorpt\_process\_details field.

Absorption correction given as multi-scan

|                   |             |                             |                                 |           |
|-------------------|-------------|-----------------------------|---------------------------------|-----------|
| PLAT220_ALERT_2_C | NonSolvent  | Resd 1 C                    | Ueq(max)/Ueq(min) Range         | 5.5 Ratio |
| PLAT222_ALERT_3_C | NonSolvent  | Resd 1 H                    | Uiso(max)/Uiso(min) Range       | 5.5 Ratio |
| PLAT242_ALERT_2_C | Low         | 'MainMol'                   | Ueq as Compared to Neighbors of | N1 Check  |
| PLAT242_ALERT_2_C | Low         | 'MainMol'                   | Ueq as Compared to Neighbors of | N4 Check  |
| PLAT369_ALERT_2_C | Long        | C(sp2)-C(sp2) Bond          | C6 - C7                         | 1.53 Ang. |
| PLAT911_ALERT_3_C | Missing FCF | Refl Between Thmin & STh/L= | 0.600                           | 17 Report |
| PLAT971_ALERT_2_C | Check Calcd | Resid. Dens.                | 0.75Ang From I2                 | 1.81 eA-3 |

---

### Alert level G

|                   |                                                  |                                          |              |
|-------------------|--------------------------------------------------|------------------------------------------|--------------|
| PLAT003_ALERT_2_G | Number of Uiso or Uij                            | Restrained non-H Atoms ...               | 3 Report     |
| PLAT083_ALERT_2_G | SHELXL                                           | Second Parameter in WGHT Unusually Large | 11.13 Why ?  |
| PLAT178_ALERT_4_G | The CIF-Embedded .res File                       | Contains SIMU Records                    | 1 Report     |
| PLAT186_ALERT_4_G | The CIF-Embedded .res File                       | Contains ISOR Records                    | 1 Report     |
| PLAT232_ALERT_2_G | Hirshfeld Test Diff (M-X)                        | Zn06 --06 .                              | 12.7 s.u.    |
| PLAT431_ALERT_2_G | Short Inter HL..A Contact                        | I1 ..01 .                                | 3.18 Ang.    |
|                   |                                                  | 1/2-x,1/2+y,1/2-z =                      | 2_555 Check  |
| PLAT431_ALERT_2_G | Short Inter HL..A Contact                        | I2 ..05 .                                | 3.13 Ang.    |
|                   |                                                  | 1/2-x,1/2+y,1/2-z =                      | 2_555 Check  |
| PLAT431_ALERT_2_G | Short Inter HL..A Contact                        | I3 ..05 .                                | 3.08 Ang.    |
|                   |                                                  | 1/2+x,1/2-y,-1/2+z =                     | 4_665 Check  |
| PLAT720_ALERT_4_G | Number of Unusual/Non-Standard Labels            | .....                                    | 1 Note       |
| PLAT794_ALERT_5_G | Tentative Bond Valency for Zn06                  | (II) .                                   | 2.05 Info    |
| PLAT860_ALERT_3_G | Number of Least-Squares Restraints               | .....                                    | 18 Note      |
| PLAT883_ALERT_1_G | No Info/Value for _atom_sites_solution_primary   | .                                        | Please Do !  |
| PLAT910_ALERT_3_G | Missing # of FCF Reflection(s) Below Theta(Min). | .                                        | 3 Note       |
| PLAT913_ALERT_3_G | Missing # of Very Strong Reflections in FCF      | ....                                     | 3 Note       |
| PLAT933_ALERT_2_G | Number of HKL-OMIT Records in Embedded .res File | .                                        | 9 Note       |
| PLAT965_ALERT_2_G | The SHELXL WEIGHT Optimisation                   | has not Converged                        | Please Check |
| PLAT978_ALERT_2_G | Number C-C Bonds with Positive Residual Density. | .                                        | 2 Info       |

---

1 **ALERT level A** = Most likely a serious problem - resolve or explain

1 **ALERT level B** = A potentially serious problem, consider carefully

8 **ALERT level C** = Check. Ensure it is not caused by an omission or oversight

17 **ALERT level G** = General information/check it is not something unexpected

2 ALERT type 1 CIF construction/syntax error, inconsistent or missing data  
16 ALERT type 2 Indicator that the structure model may be wrong or deficient  
5 ALERT type 3 Indicator that the structure quality may be low  
3 ALERT type 4 Improvement, methodology, query or suggestion  
1 ALERT type 5 Informative message, check

---

It is advisable to attempt to resolve as many as possible of the alerts in all categories. Often the minor alerts point to easily fixed oversights, errors and omissions in your CIF or refinement strategy, so attention to these fine details can be worthwhile. In order to resolve some of the more serious problems it may be necessary to carry out additional measurements or structure refinements. However, the purpose of your study may justify the reported deviations and the more serious of these should normally be commented upon in the discussion or experimental section of a paper or in the "special\_details" fields of the CIF. checkCIF was carefully designed to identify outliers and unusual parameters, but every test has its limitations and alerts that are not important in a particular case may appear. Conversely, the absence of alerts does not guarantee there are no aspects of the results needing attention. It is up to the individual to critically assess their own results and, if necessary, seek expert advice.

### **Publication of your CIF in IUCr journals**

A basic structural check has been run on your CIF. These basic checks will be run on all CIFs submitted for publication in IUCr journals (*Acta Crystallographica*, *Journal of Applied Crystallography*, *Journal of Synchrotron Radiation*); however, if you intend to submit to *Acta Crystallographica Section C* or *E* or *IUCrData*, you should make sure that full publication checks are run on the final version of your CIF prior to submission.

### **Publication of your CIF in other journals**

Please refer to the *Notes for Authors* of the relevant journal for any special instructions relating to CIF submission.

---

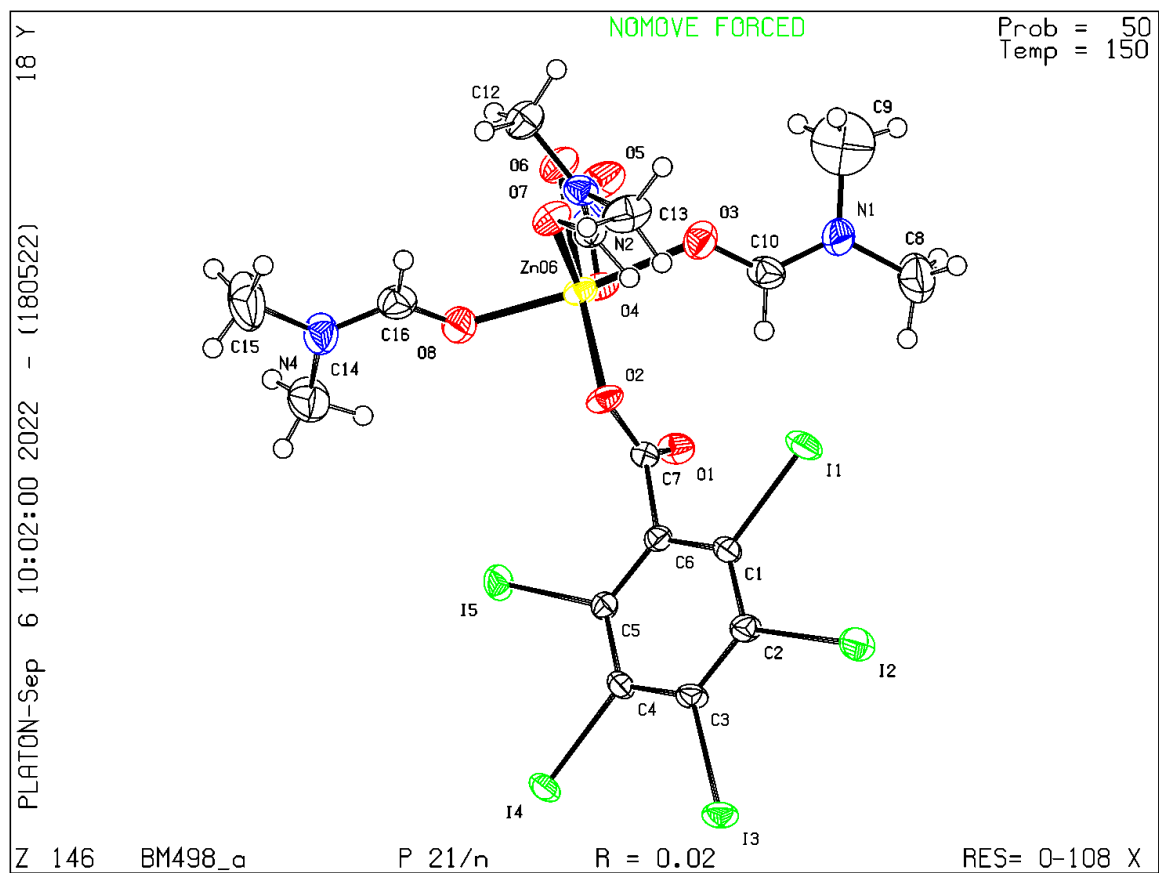

Supplement: s1 [file s1]
