# Supplementary material
Source: MDPI journal article supplement (https://www.mdpi.com/2304-6740/10/10/151)
Supplement: s1 [file s1]

## Heteroleptic Zn(II) pentaiodobenzoate complexes: structures and features of halogen...halogen non-covalent interactions in solid state

Mikhail A. Bondarenko, Alexander S. Novikov, Maxim N. Sokolov and Sergey A. Adonin\*

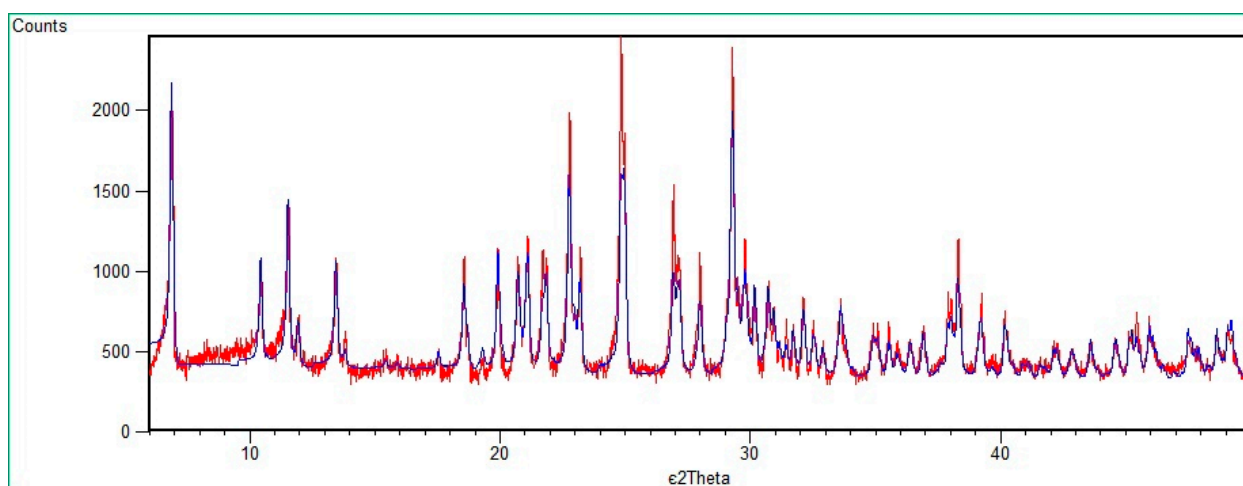

**Figure S1.** Comparison of experimental (red) and calculated (blue) PXRD patterns for **1**

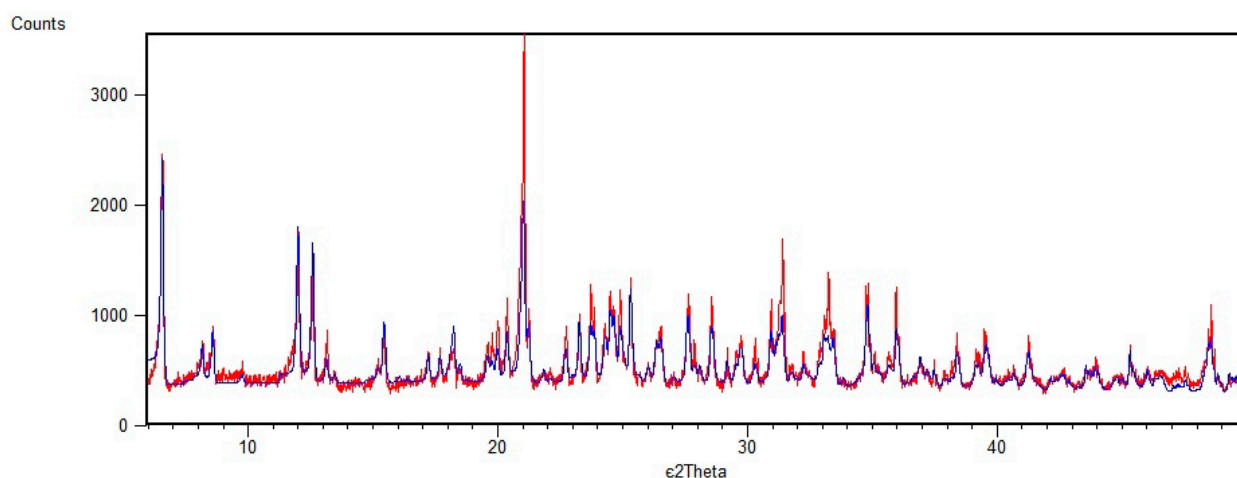

**Figure S2.** Comparison of experimental (red) and calculated (blue) PXRD patterns for **2**

### Computational details

The DFT calculations based on the experimental X-ray geometries of **1** and **2** have been carried out using the dispersion-corrected hybrid functional  $\omega$ B97XD [Phys. Chem. Chem. Phys. 2008, 10, 6615.] with the help of Gaussian-09 [M. J. Frisch, G. W. Trucks, H. B. Schlegel, G. E. Scuseria, M. A. Robb, J. R. Cheeseman, G. Scalmani, V. Barone, B. Mennucci, G. A. Petersson, H. Nakatsuji, M. Caricato, X. Li, H. P. Hratchian, A. F. Izmaylov, J. Bloino, G. Zheng, J. L. Sonnenberg, M. Hada, M. Ehara, K. Toyota, R. Fukuda, J. Hasegawa, M. Ishida, T. Nakajima, Y. Honda, O. Kitao, H. Nakai, T. Vreven, M. J. A.; J. E. Peralta, F. Ogliaro, M. Bearpark, J. J. Heyd, E. Brothers,

K. N. Kudin, V. N. Staroverov, T. Keith, R. Kobayashi, J. Normand, K. Raghavachari, A. Rendell, J. C. Burant, S. S. Iyengar, J. Tomasi, M. Cossi, N. Rega, J. M. Millam, M. Klene, J. E. Knox, J. B. Cross, V. Bakken, C. Adamo, J. Jaramillo, R. Gomperts, R. E. Stratmann, O. Yazyev, A. J. Austin, R. Cammi, C. Pomelli, J. W. Ochterski, R. L. Martin, K. Morokuma, V. G. Zakrzewski, G. A. Voth, P. Salvador, J. J. Dannenberg, S. Dapprich, A. D. Daniels, O. Farkas, J. B. Foresman, J. V. Ortiz, C. J., D. J. Fox, in Gaussian 09, Revision C.01, Gaussian, Inc., Wallingford, CT, 2010.] program package. The Douglas–Kroll–Hess 2<sup>nd</sup> order scalar relativistic calculations requested relativistic core Hamiltonian were carried out using the DZP-DKH basis sets [Mol. Phys. 2010, 108, 1965. || J. Chem. Phys. 2009, 130, 064108. || Chem. Phys. Lett. 2013, 582, 158. || J. Mol. Struct. - Theochem 2010, 961, 107.] for all atoms. The topological analysis of the electron density distribution has been performed by using the Multiwfn program (version 3.7) [J. Comput. Chem. 2012, 33, 580.]. The Cartesian atomic coordinates for model supramolecular associates are presented in **Table S1**.

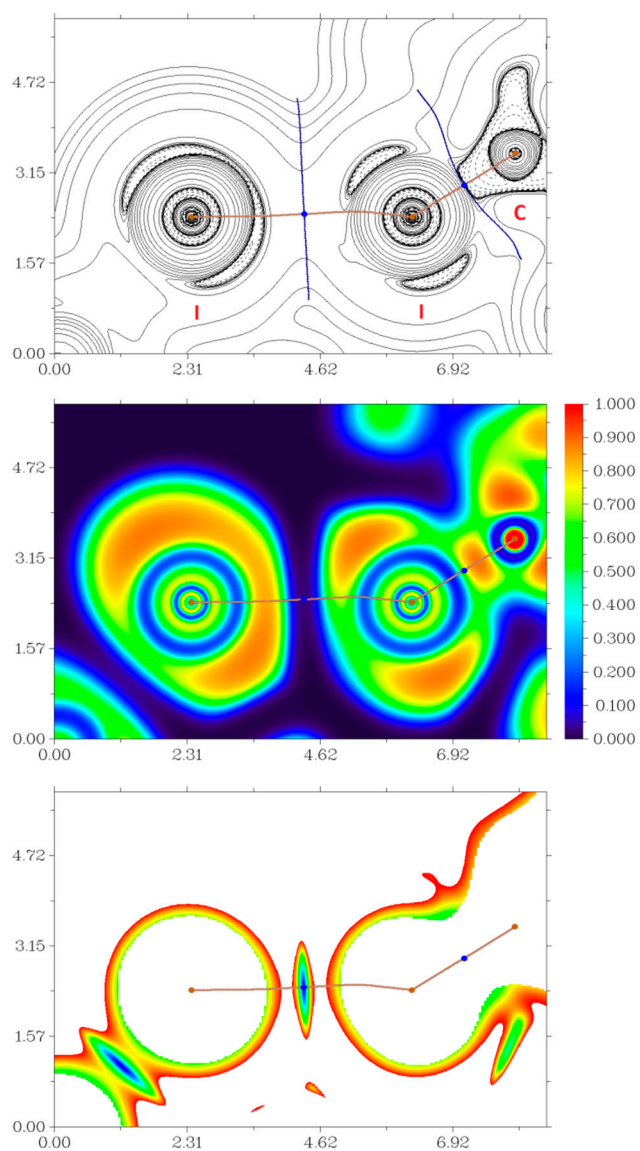

**Figure S3.** Contour line diagram of the Laplacian of electron density distribution  $\nabla^2\rho(\mathbf{r})$ , bond paths, and selected zero-flux surfaces (top panel), visualization of electron localization function (ELF, center panel) and reduced density gradient (RDG, bottom panel) analyses for intermolecular interactions I...I in **1**. Bond critical points (3, -1) are shown in blue, nuclear critical points (3, -3) – in pale brown, bond paths are shown as pale brown lines, length units – Å, and the color scale for the ELF and RDG maps is presented in a.u.

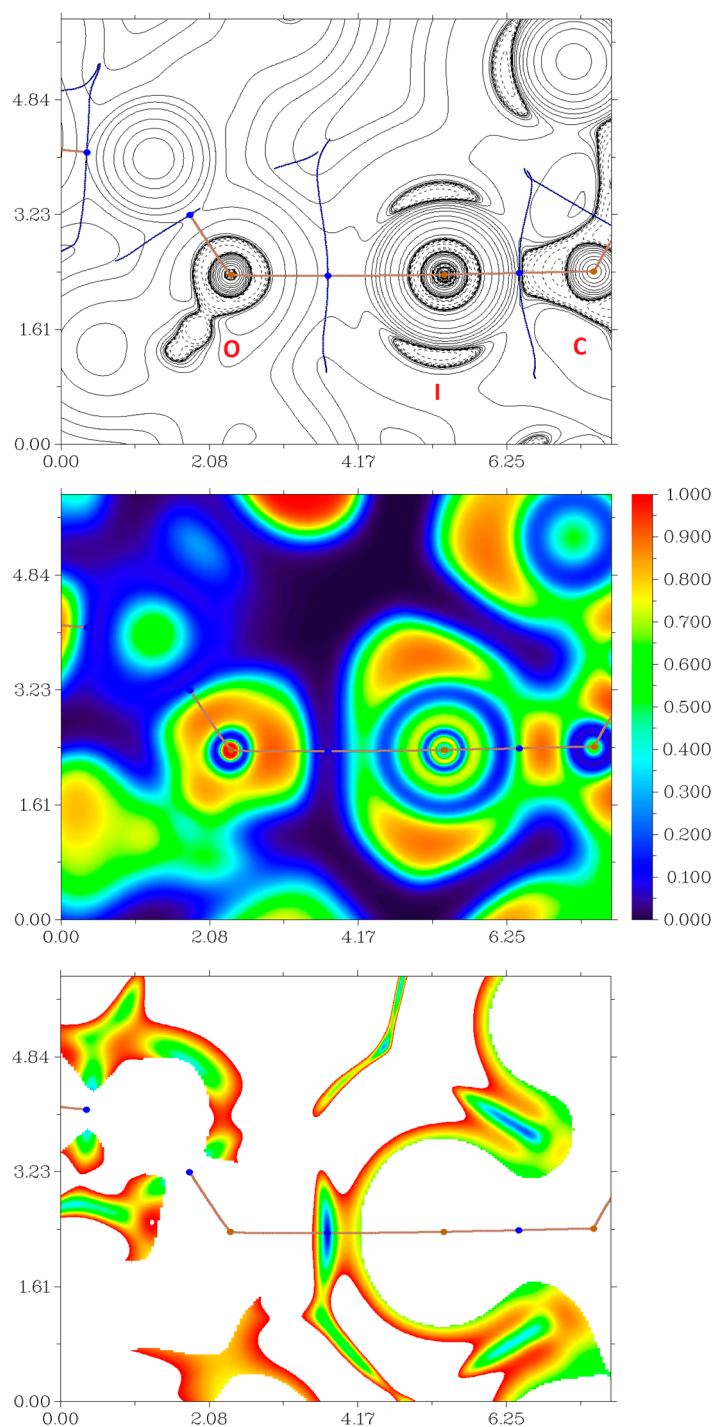

**Figure S4.** Contour line diagram of the Laplacian of electron density distribution  $\nabla^2\rho(\mathbf{r})$ , bond paths, and selected zero-flux surfaces (top panel), visualization of electron localization function (ELF, center panel) and reduced density gradient (RDG, bottom panel) analyses for intermolecular interactions  $\text{I}\cdots\text{O}$  in **2**. Bond critical points (3, -1) are shown in blue, nuclear critical points (3, -3) – in pale brown, bond paths are shown as pale brown lines, length units – Å, and the color scale for the ELF and RDG maps is presented in a.u.

**Table S1.** Cartesian atomic coordinates for model supramolecular associates.

| Atom     | X         | Y         | Z         |
|----------|-----------|-----------|-----------|
| <b>1</b> |           |           |           |
| I        | 17.481604 | 1.428625  | 8.442763  |
| N        | 13.184513 | 1.022502  | 6.003012  |
| C        | 15.194854 | 3.621403  | 8.034730  |
| O        | 14.157045 | 3.042842  | 8.500044  |
| Zn       | 12.749500 | 2.569100  | 7.236018  |
| I        | 20.145230 | 2.739174  | 10.358690 |
| C        | 16.189315 | 4.086924  | 9.095892  |
| O        | 15.463614 | 3.826931  | 6.850713  |
| I        | 19.477156 | 5.533225  | 12.418818 |
| C        | 17.308721 | 3.305918  | 9.372316  |
| I        | 16.630448 | 7.490982  | 11.791796 |
| C        | 18.316952 | 3.763218  | 10.227695 |
| C        | 18.107860 | 4.957335  | 10.941791 |
| I        | 14.507911 | 6.583884  | 9.039378  |
| C        | 12.513889 | -0.220943 | 4.060364  |
| C        | 11.538807 | -0.389476 | 2.933168  |
| H        | 10.719780 | -0.810808 | 3.269484  |
| H        | 11.938632 | -0.954678 | 2.239036  |
| H        | 11.321556 | 0.489157  | 2.555388  |
| C        | 16.049071 | 5.325230  | 9.711704  |
| C        | 16.960915 | 5.746563  | 10.693009 |
| C        | 13.619526 | -1.051276 | 4.238504  |
| H        | 13.784759 | -1.755209 | 3.621157  |
| C        | 14.481392 | -0.860135 | 5.307345  |
| C        | 15.673725 | -1.757264 | 5.517734  |
| H        | 15.375897 | -2.619454 | 5.875550  |
| H        | 16.288761 | -1.335932 | 6.153510  |
| H        | 16.130667 | -1.898051 | 4.663891  |
| C        | 14.222322 | 0.187030  | 6.176545  |
| H        | 14.799620 | 0.319596  | 6.919819  |
| C        | 12.343556 | 0.811836  | 4.972564  |
| H        | 11.602045 | 1.394507  | 4.866602  |
| I        | 8.017396  | 3.709575  | 8.442763  |
| N        | 12.314487 | 4.115698  | 6.003012  |
| C        | 10.304146 | 1.516797  | 8.034730  |
| O        | 11.341955 | 2.095358  | 8.500044  |
| I        | 5.353770  | 2.399026  | 10.358690 |
| C        | 9.309685  | 1.051276  | 9.095892  |
| O        | 10.035386 | 1.311269  | 6.850713  |
| I        | 6.021844  | -0.395025 | 12.418818 |
| C        | 8.190279  | 1.832282  | 9.372316  |

|    |           |           |           |
|----|-----------|-----------|-----------|
| I  | 8.868552  | -2.352782 | 11.791796 |
| C  | 7.182048  | 1.374982  | 10.227695 |
| C  | 7.391140  | 0.180865  | 10.941791 |
| I  | 10.991089 | -1.445684 | 9.039378  |
| C  | 12.985111 | 5.359143  | 4.060364  |
| C  | 13.960193 | 5.527676  | 2.933168  |
| H  | 14.779220 | 5.949008  | 3.269484  |
| H  | 13.560368 | 6.092878  | 2.239036  |
| H  | 14.177444 | 4.649043  | 2.555388  |
| C  | 9.449929  | -0.187030 | 9.711704  |
| C  | 8.538085  | -0.608363 | 10.693009 |
| C  | 11.879474 | 6.189476  | 4.238504  |
| H  | 11.714241 | 6.893409  | 3.621157  |
| C  | 11.017608 | 5.998335  | 5.307345  |
| C  | 9.825275  | 6.895464  | 5.517734  |
| H  | 10.123103 | 7.757654  | 5.875550  |
| H  | 9.210239  | 6.474132  | 6.153510  |
| H  | 9.368333  | 7.036251  | 4.663891  |
| C  | 11.276678 | 4.951170  | 6.176545  |
| H  | 10.699380 | 4.818604  | 6.919819  |
| C  | 13.155444 | 4.326364  | 4.972564  |
| H  | 13.896955 | 3.743693  | 4.866602  |
| I  | -4.732104 | 9.135925  | 4.603538  |
| N  | -0.435013 | 8.729802  | 2.163787  |
| C  | -2.445354 | 11.328703 | 4.195505  |
| O  | -1.407545 | 10.750142 | 4.660819  |
| Zn | 0.000000  | 10.276400 | 3.396793  |
| I  | -7.395730 | 10.446474 | 6.519465  |
| C  | -3.439815 | 11.794224 | 5.256667  |
| O  | -2.714114 | 11.534231 | 3.011488  |
| I  | -6.727656 | 13.240525 | 8.579593  |
| C  | -4.559221 | 11.013218 | 5.533091  |
| I  | -3.880948 | 15.198282 | 7.952571  |
| C  | -5.567452 | 11.470518 | 6.388470  |
| C  | -5.358360 | 12.664635 | 7.102566  |
| I  | -1.758411 | 14.291184 | 5.200153  |
| C  | 0.235611  | 7.486357  | 0.221139  |
| C  | 1.210693  | 7.317824  | -0.906057 |
| H  | 2.029720  | 6.896492  | -0.569741 |
| H  | 0.810868  | 6.752622  | -1.600189 |
| H  | 1.427944  | 8.196457  | -1.283837 |
| C  | -3.299571 | 13.032530 | 5.872479  |
| C  | -4.211415 | 13.453863 | 6.853784  |
| C  | -0.870026 | 6.656024  | 0.399279  |
| H  | -1.035259 | 5.952091  | -0.218068 |

|    |           |           |           |
|----|-----------|-----------|-----------|
| C  | -1.731892 | 6.847165  | 1.468120  |
| C  | -2.924225 | 5.950036  | 1.678509  |
| H  | -2.626397 | 5.087846  | 2.036325  |
| H  | -3.539261 | 6.371368  | 2.314285  |
| H  | -3.381167 | 5.809249  | 0.824666  |
| C  | -1.472822 | 7.894330  | 2.337320  |
| H  | -2.050120 | 8.026896  | 3.080594  |
| C  | 0.405944  | 8.519136  | 1.133339  |
| H  | 1.147455  | 9.101807  | 1.027377  |
| I  | 4.732104  | 11.416875 | 4.603538  |
| N  | 0.435013  | 11.822998 | 2.163787  |
| C  | 2.445354  | 9.224097  | 4.195505  |
| O  | 1.407545  | 9.802658  | 4.660819  |
| I  | 7.395730  | 10.106326 | 6.519465  |
| C  | 3.439815  | 8.758576  | 5.256667  |
| O  | 2.714114  | 9.018569  | 3.011488  |
| I  | 6.727656  | 7.312275  | 8.579593  |
| C  | 4.559221  | 9.539582  | 5.533091  |
| I  | 3.880948  | 5.354518  | 7.952571  |
| C  | 5.567452  | 9.082282  | 6.388470  |
| C  | 5.358360  | 7.888165  | 7.102566  |
| I  | 1.758411  | 6.261616  | 5.200153  |
| C  | -0.235611 | 13.066443 | 0.221139  |
| C  | -1.210693 | 13.234976 | -0.906057 |
| H  | -2.029720 | 13.656308 | -0.569741 |
| H  | -0.810868 | 13.800178 | -1.600189 |
| H  | -1.427944 | 12.356343 | -1.283837 |
| C  | 3.299571  | 7.520270  | 5.872479  |
| C  | 4.211415  | 7.098937  | 6.853784  |
| C  | 0.870026  | 13.896776 | 0.399279  |
| H  | 1.035259  | 14.600709 | -0.218068 |
| C  | 1.731892  | 13.705635 | 1.468120  |
| C  | 2.924225  | 14.602764 | 1.678509  |
| H  | 2.626397  | 15.464954 | 2.036325  |
| H  | 3.539261  | 14.181432 | 2.314285  |
| H  | 3.381167  | 14.743551 | 0.824666  |
| C  | 1.472822  | 12.658470 | 2.337320  |
| H  | 2.050120  | 12.525904 | 3.080594  |
| C  | -0.405944 | 12.033664 | 1.133339  |
| H  | -1.147455 | 11.450993 | 1.027377  |
| I  | -4.732104 | 3.997725  | 12.281988 |
| N  | -0.435013 | 3.591602  | 9.842237  |
| C  | -2.445354 | 6.190503  | 11.873955 |
| O  | -1.407545 | 5.611942  | 12.339269 |
| Zn | 0.000000  | 5.138200  | 11.075243 |

|   |           |           |           |
|---|-----------|-----------|-----------|
| I | -7.395730 | 5.308274  | 14.197915 |
| C | -3.439815 | 6.656024  | 12.935117 |
| O | -2.714114 | 6.396031  | 10.689938 |
| I | -6.727656 | 8.102325  | 16.258043 |
| C | -4.559221 | 5.875018  | 13.211541 |
| I | -3.880948 | 10.060082 | 15.631021 |
| C | -5.567452 | 6.332318  | 14.066920 |
| C | -5.358360 | 7.526435  | 14.781016 |
| I | -1.758411 | 9.152984  | 12.878603 |
| C | 0.235611  | 2.348157  | 7.899589  |
| C | 1.210693  | 2.179624  | 6.772393  |
| H | 2.029720  | 1.758292  | 7.108709  |
| H | 0.810868  | 1.614422  | 6.078261  |
| H | 1.427944  | 3.058257  | 6.394613  |
| C | -3.299571 | 7.894330  | 13.550929 |
| C | -4.211415 | 8.315663  | 14.532234 |
| C | -0.870026 | 1.517824  | 8.077729  |
| H | -1.035259 | 0.813891  | 7.460382  |
| C | -1.731892 | 1.708965  | 9.146570  |
| C | -2.924225 | 0.811836  | 9.356959  |
| H | -2.626397 | -0.050354 | 9.714775  |
| H | -3.539261 | 1.233168  | 9.992735  |
| H | -3.381167 | 0.671049  | 8.503116  |
| C | -1.472822 | 2.756130  | 10.015770 |
| H | -2.050120 | 2.888696  | 10.759044 |
| C | 0.405944  | 3.380936  | 8.811789  |
| H | 1.147455  | 3.963607  | 8.705827  |
| I | 4.732104  | 6.278675  | 12.281988 |
| N | 0.435013  | 6.684798  | 9.842237  |
| C | 2.445354  | 4.085897  | 11.873955 |
| O | 1.407545  | 4.664458  | 12.339269 |
| I | 7.395730  | 4.968126  | 14.197915 |
| C | 3.439815  | 3.620376  | 12.935117 |
| O | 2.714114  | 3.880369  | 10.689938 |
| I | 6.727656  | 2.174075  | 16.258043 |
| C | 4.559221  | 4.401382  | 13.211541 |
| I | 3.880948  | 0.216318  | 15.631021 |
| C | 5.567452  | 3.944082  | 14.066920 |
| C | 5.358360  | 2.749965  | 14.781016 |
| I | 1.758411  | 1.123416  | 12.878603 |
| C | -0.235611 | 7.928243  | 7.899589  |
| C | -1.210693 | 8.096776  | 6.772393  |
| H | -2.029720 | 8.518108  | 7.108709  |
| H | -0.810868 | 8.661978  | 6.078261  |
| H | -1.427944 | 7.218143  | 6.394613  |



|          |             |            |             |
|----------|-------------|------------|-------------|
| C        | 3.299571    | 2.382070   | 13.550929   |
| C        | 4.211415    | 1.960737   | 14.532234   |
| C        | 0.870026    | 8.758576   | 8.077729    |
| H        | 1.035259    | 9.462509   | 7.460382    |
| C        | 1.731892    | 8.567435   | 9.146570    |
| C        | 2.924225    | 9.464564   | 9.356959    |
| H        | 2.626397    | 10.326754  | 9.714775    |
| H        | 3.539261    | 9.043232   | 9.992735    |
| H        | 3.381167    | 9.605351   | 8.503116    |
| C        | 1.472822    | 7.520270   | 10.015770   |
| H        | 2.050120    | 7.387704   | 10.759044   |
| C        | -0.405944   | 6.895464   | 8.811789    |
| H        | -1.147455   | 6.312793   | 8.705827    |
| <b>2</b> |             |            |             |
| I        | 3.22640400  | 4.83870000 | 6.07441000  |
| N        | 0.23290500  | 3.88671800 | 8.97946900  |
| O        | 3.94470300  | 1.91891700 | 8.18176500  |
| C        | 4.95593700  | 3.70364400 | 5.70467000  |
| I        | 4.61819400  | 4.70192200 | 2.84415200  |
| O        | 4.96150700  | 3.76211300 | 8.93144100  |
| N        | 2.58237800  | 2.02914500 | 12.32725000 |
| C        | 5.55473000  | 3.69214200 | 4.44197400  |
| I        | 7.62003200  | 2.89792900 | 2.32737500  |
| N        | 4.35327400  | 7.68046100 | 10.78255400 |
| O        | 2.13992900  | 4.11963300 | 10.14476700 |
| C        | 6.73045000  | 2.93588600 | 4.23805400  |
| I        | 8.95521200  | 0.95409100 | 4.98853400  |
| N        | 7.72086800  | 3.07391000 | 12.72194400 |
| O        | 3.15266700  | 1.73105100 | 11.22795900 |
| C        | 7.28667700  | 2.20455000 | 5.30031800  |
| I        | 7.44437500  | 1.19687900 | 8.20349900  |
| O        | 1.81601500  | 1.22304600 | 12.85180900 |
| C        | 6.66509300  | 2.24001500 | 6.54772000  |
| Zn       | 4.06461800  | 3.57395900 | 10.72915900 |
| O        | 2.84340600  | 3.13525400 | 12.83463600 |
| C        | 5.48600100  | 2.96751600 | 6.75110300  |
| C        | 4.73058200  | 2.86112300 | 8.07578000  |
| O        | 4.29866700  | 5.49124700 | 11.38304600 |
| O        | 5.77731200  | 2.91575700 | 11.60762600 |
| C        | -0.48953800 | 3.43047200 | 7.80800100  |
| C        | -0.59418100 | 4.48194600 | 10.02965900 |
| C        | 1.48054400  | 3.65763600 | 9.22471000  |
| H        | 1.93237100  | 3.07007600 | 8.63173200  |
| C        | 4.25070600  | 6.38361000 | 10.52738500 |
| H        | 4.13124100  | 6.12098100 | 9.62181800  |

|    |             |             |             |
|----|-------------|-------------|-------------|
| C  | 4.51178900  | 8.20476000  | 12.11984200 |
| H  | 4.57402300  | 7.46192300  | 12.75575100 |
| H  | 3.73913000  | 8.76452400  | 12.34522800 |
| H  | 5.32908600  | 8.74247900  | 12.16545600 |
| C  | 4.33110000  | 8.66292300  | 9.70499600  |
| H  | 4.24470800  | 8.20284300  | 8.84638500  |
| H  | 5.16315600  | 9.17955500  | 9.71841200  |
| H  | 3.56881100  | 9.26773600  | 9.83110500  |
| C  | 8.12761500  | 1.72625900  | 12.36669300 |
| H  | 7.46176900  | 1.33135700  | 11.76566500 |
| H  | 8.19921100  | 1.18183100  | 13.17700800 |
| H  | 8.99676500  | 1.75501400  | 11.91592200 |
| C  | 8.56990400  | 3.79374300  | 13.64387800 |
| H  | 8.28506100  | 4.73019800  | 13.68680900 |
| H  | 9.49954000  | 3.74869400  | 13.33531400 |
| H  | 8.50175800  | 3.38925600  | 14.53468800 |
| C  | 6.55325900  | 3.56370300  | 12.29156400 |
| H  | 6.31851000  | 4.45319100  | 12.52768300 |
| I  | 1.51498300  | 9.63120000  | 7.34139900  |
| N  | 4.50848200  | 8.67921800  | 4.43634000  |
| O  | 0.79668400  | 6.71141700  | 5.23404400  |
| C  | -0.21455100 | 8.49614400  | 7.71113900  |
| I  | 0.12319300  | 9.49442200  | 10.57165800 |
| O  | -0.22012000 | 8.55461300  | 4.48436800  |
| N  | 2.15900900  | 6.82164500  | 1.08855900  |
| C  | -0.81334300 | 8.48464200  | 8.97383500  |
| I  | -2.87864500 | 7.69042900  | 11.08843500 |
| N  | 0.38811300  | 12.47296100 | 2.63325500  |
| O  | 2.60145800  | 8.91213300  | 3.27104300  |
| C  | -1.98906300 | 7.72838600  | 9.17775500  |
| I  | -4.21382500 | 5.74659100  | 8.42727500  |
| N  | -2.97948100 | 7.86641000  | 0.69386600  |
| O  | 1.58872000  | 6.52355100  | 2.18785000  |
| C  | -2.54529100 | 6.99705000  | 8.11549100  |
| I  | -2.70298800 | 5.98937900  | 5.21231000  |
| O  | 2.92537200  | 6.01554600  | 0.56400100  |
| C  | -1.92370600 | 7.03251500  | 6.86808900  |
| Zn | 0.67676900  | 8.36645900  | 2.68665000  |
| O  | 1.89798100  | 7.92775400  | 0.58117300  |
| C  | -0.74461400 | 7.76001600  | 6.66470600  |
| C  | 0.01080500  | 7.65362300  | 5.34002900  |
| O  | 0.44271900  | 10.28374700 | 2.03276300  |
| O  | -1.03592500 | 7.70825700  | 1.80818300  |
| C  | 5.23092500  | 8.22297100  | 5.60780800  |
| C  | 5.33556800  | 9.27444600  | 3.38615000  |

|    |             |             |              |
|----|-------------|-------------|--------------|
| C  | 3.26084300  | 8.45013600  | 4.19109900   |
| H  | 2.80901600  | 7.86257600  | 4.78407800   |
| C  | 0.49068100  | 11.17611000 | 2.88842400   |
| H  | 0.61014600  | 10.91348100 | 3.79399100   |
| C  | 0.22959800  | 12.99726000 | 1.29596700   |
| H  | 0.16736400  | 12.25442300 | 0.66005800   |
| H  | 1.00225700  | 13.55702400 | 1.07058200   |
| H  | -0.58769900 | 13.53497900 | 1.25035300   |
| C  | 0.41028700  | 13.45542300 | 3.71081300   |
| H  | 0.49667900  | 12.99534300 | 4.56942500   |
| H  | -0.42176900 | 13.97205500 | 3.69739700   |
| H  | 1.17257600  | 14.06023700 | 3.58470400   |
| C  | -3.38622800 | 6.51875900  | 1.04911600   |
| H  | -2.72038200 | 6.12385700  | 1.65014500   |
| H  | -3.45782400 | 5.97433000  | 0.23880100   |
| H  | -4.25537800 | 6.54751400  | 1.49988700   |
| C  | -3.82851700 | 8.58624300  | -0.22806900  |
| H  | -3.54367400 | 9.52269800  | -0.27099900  |
| H  | -4.75815300 | 8.54119400  | 0.08049500   |
| H  | -3.76037100 | 8.18175600  | -1.11887800  |
| C  | -1.81187200 | 8.35620300  | 1.12424500   |
| H  | -1.57712300 | 9.24569100  | 0.88812700   |
| I  | 9.84921700  | -0.04620000 | -7.34139900  |
| N  | 6.85571800  | 0.90578200  | -4.43634000  |
| O  | 10.56751600 | 2.87358300  | -5.23404400  |
| C  | 11.57875100 | 1.08885600  | -7.71113900  |
| I  | 11.24100700 | 0.09057800  | -10.57165800 |
| O  | 11.58432000 | 1.03038700  | -4.48436800  |
| N  | 9.20519100  | 2.76335600  | -1.08855900  |
| C  | 12.17754300 | 1.10035800  | -8.97383500  |
| I  | 14.24284500 | 1.89457100  | -11.08843500 |
| N  | 10.97608700 | -2.88796100 | -2.63325500  |
| O  | 8.76274200  | 0.67286700  | -3.27104300  |
| C  | 13.35326300 | 1.85661400  | -9.17775500  |
| I  | 15.57802500 | 3.83840900  | -8.42727500  |
| N  | 14.34368100 | 1.71859100  | -0.69386600  |
| O  | 9.77548000  | 3.06144900  | -2.18785000  |
| C  | 13.90949100 | 2.58795000  | -8.11549100  |
| I  | 14.06718800 | 3.59562100  | -5.21231000  |
| O  | 8.43882800  | 3.56945400  | -0.56400100  |
| C  | 13.28790600 | 2.55248500  | -6.86808900  |
| Zn | 10.68743100 | 1.21854100  | -2.68665000  |
| O  | 9.46621900  | 1.65724700  | -0.58117300  |
| C  | 12.10881400 | 1.82498400  | -6.66470600  |
| C  | 11.35339500 | 1.93137700  | -5.34002900  |

|   |             |             |             |
|---|-------------|-------------|-------------|
| O | 10.92148100 | -0.69874600 | -2.03276300 |
| O | 12.40012500 | 1.87674300  | -1.80818300 |
| C | 6.13327500  | 1.36202800  | -5.60780800 |
| C | 6.02863200  | 0.31055400  | -3.38615000 |
| C | 8.10335700  | 1.13486400  | -4.19109900 |
| H | 8.55518400  | 1.72242500  | -4.78407800 |
| C | 10.87351900 | -1.59111000 | -2.88842400 |
| H | 10.75405400 | -1.32848100 | -3.79399100 |
| C | 11.13460200 | -3.41226000 | -1.29596700 |
| H | 11.19683600 | -2.66942300 | -0.66005800 |
| H | 10.36194300 | -3.97202400 | -1.07058200 |
| H | 11.95189900 | -3.94997900 | -1.25035300 |
| C | 10.95391300 | -3.87042300 | -3.71081300 |
| H | 10.86752100 | -3.41034300 | -4.56942500 |
| H | 11.78596900 | -4.38705500 | -3.69739700 |
| H | 10.19162400 | -4.47523700 | -3.58470400 |
| C | 14.75042800 | 3.06624100  | -1.04911600 |
| H | 14.08458200 | 3.46114300  | -1.65014500 |
| H | 14.82202400 | 3.61067000  | -0.23880100 |
| H | 15.61957800 | 3.03748700  | -1.49988700 |
| C | 15.19271700 | 0.99875700  | 0.22806900  |
| H | 14.90787400 | 0.06230300  | 0.27099900  |
| H | 16.12235300 | 1.04380700  | -0.08049500 |
| H | 15.12457100 | 1.40324400  | 1.11887800  |
| C | 13.17607200 | 1.22879700  | -1.12424500 |
| H | 12.94132300 | 0.33930900  | -0.88812700 |
| I | 12.87918300 | 0.04620000  | 7.34139900  |
| N | 15.87268200 | -0.90578200 | 4.43634000  |
| O | 12.16088400 | -2.87358300 | 5.23404400  |
| C | 11.14964900 | -1.08885600 | 7.71113900  |
| I | 11.48739300 | -0.09057800 | 10.57165800 |
| O | 11.14408000 | -1.03038700 | 4.48436800  |
| N | 13.52320900 | -2.76335600 | 1.08855900  |
| C | 10.55085700 | -1.10035800 | 8.97383500  |
| I | 8.48555500  | -1.89457100 | 11.08843500 |
| N | 11.75231300 | 2.88796100  | 2.63325500  |
| O | 13.96565800 | -0.67286700 | 3.27104300  |
| C | 9.37513700  | -1.85661400 | 9.17775500  |
| I | 7.15037500  | -3.83840900 | 8.42727500  |
| N | 8.38471900  | -1.71859100 | 0.69386600  |
| O | 12.95292000 | -3.06144900 | 2.18785000  |
| C | 8.81890900  | -2.58795000 | 8.11549100  |
| I | 8.66121200  | -3.59562100 | 5.21231000  |
| O | 14.28957200 | -3.56945400 | 0.56400100  |
| C | 9.44049400  | -2.55248500 | 6.86808900  |

|    |             |             |             |
|----|-------------|-------------|-------------|
| Zn | 12.04096900 | -1.21854100 | 2.68665000  |
| O  | 13.26218100 | -1.65724700 | 0.58117300  |
| C  | 10.61958600 | -1.82498400 | 6.66470600  |
| C  | 11.37500500 | -1.93137700 | 5.34002900  |
| O  | 11.80691900 | 0.69874600  | 2.03276300  |
| O  | 10.32827500 | -1.87674300 | 1.80818300  |
| C  | 16.59512500 | -1.36202800 | 5.60780800  |
| C  | 16.69976800 | -0.31055400 | 3.38615000  |
| C  | 14.62504300 | -1.13486400 | 4.19109900  |
| H  | 14.17321600 | -1.72242500 | 4.78407800  |
| C  | 11.85488100 | 1.59111000  | 2.88842400  |
| H  | 11.97434600 | 1.32848100  | 3.79399100  |
| C  | 11.59379800 | 3.41226000  | 1.29596700  |
| H  | 11.53156400 | 2.66942300  | 0.66005800  |
| H  | 12.36645700 | 3.97202400  | 1.07058200  |
| H  | 10.77650100 | 3.94997900  | 1.25035300  |
| C  | 11.77448700 | 3.87042300  | 3.71081300  |
| H  | 11.86087900 | 3.41034300  | 4.56942500  |
| H  | 10.94243100 | 4.38705500  | 3.69739700  |
| H  | 12.53677600 | 4.47523700  | 3.58470400  |
| C  | 7.97797200  | -3.06624100 | 1.04911600  |
| H  | 8.64381800  | -3.46114300 | 1.65014500  |
| H  | 7.90637600  | -3.61067000 | 0.23880100  |
| H  | 7.10882200  | -3.03748700 | 1.49988700  |
| C  | 7.53568300  | -0.99875700 | -0.22806900 |
| H  | 7.82052600  | -0.06230300 | -0.27099900 |
| H  | 6.60604700  | -1.04380700 | 0.08049500  |
| H  | 7.60382900  | -1.40324400 | -1.11887800 |
| C  | 9.55232800  | -1.22879700 | 1.12424500  |
| H  | 9.78707700  | -0.33930900 | 0.88812700  |
| H  | 6.25787396  | 8.73721871  | 3.31105966  |
| H  | 4.81645024  | 9.22419508  | 2.45186332  |
| H  | 5.53716210  | 10.29716717 | 3.62760649  |
| H  | 6.16611969  | 8.73873043  | 5.67340601  |
| H  | 4.65114560  | 8.42278310  | 6.48463807  |
| H  | 5.40863265  | 7.17071444  | 5.52985845  |
| H  | -0.07506324 | 5.30933526  | 10.46651568 |
| H  | -1.51648696 | 4.82235889  | 9.60731934  |
| H  | -0.79577510 | 3.74938681  | 10.78306251 |
| H  | 0.09024131  | 2.69025623  | 7.29727938  |
| H  | -1.42473267 | 3.00620304  | 8.10851185  |
| H  | -0.66724568 | 4.25827236  | 7.15373306  |
| H  | 17.62207396 | -0.84778129 | 3.31105966  |
| H  | 16.18065024 | -0.36080492 | 2.45186332  |
| H  | 16.90136210 | 0.71216717  | 3.62760649  |

## S-14

|   |             |             |             |
|---|-------------|-------------|-------------|
| H | 17.53031967 | -0.84626848 | 5.67340552  |
| H | 16.01534569 | -1.16221528 | 6.48463799  |
| H | 16.77283268 | -2.41428461 | 5.52985921  |
| H | 6.71305431  | 1.16221528  | -6.48463799 |
| H | 5.19808033  | 0.84626848  | -5.67340552 |
| H | 5.95556732  | 2.41428461  | -5.52985921 |
| H | 6.54774976  | 0.36080492  | -2.45186332 |
| H | 5.10632604  | 0.84778129  | -3.31105966 |
| H | 5.82703790  | -0.71216717 | -3.62760649 |
