# Supplementary material
Source: MDPI journal article supplement (https://www.mdpi.com/2304-6740/10/10/151)
Supplement: s1 [file s1]

Archive with 5 entries (5 files):
- (1) BM495.cif
- (1) checkcif.pdf
- (2) BM498_a.cif
- checkcif 2.pdf
- SI 09.09.pdf
