# Supplementary material
Source: MDPI journal article supplement (https://www.mdpi.com/2304-6740/10/10/151)
Supplement: s1 [file s1 › (1) BM495.cif]

 
data_BM495-1_a
 
_audit_creation_method            'SHELXL-2014/7'
_shelx_SHELXL_version_number      '2014/7'
_chemical_name_systematic         ?
_chemical_name_common             ?
_chemical_melting_point           ?
_chemical_formula_moiety          ?
_chemical_formula_sum
 'C28 H18 I10 N2 O4 Zn' 
_chemical_formula_weight          1780.81

loop_
 _atom_type_symbol
 _atom_type_description
 _atom_type_scat_dispersion_real
 _atom_type_scat_dispersion_imag
 _atom_type_scat_source
 'C'  'C'   0.0033   0.0016
 'International Tables Vol C Tables 4.2.6.8 and 6.1.1.4'
 'H'  'H'   0.0000   0.0000
 'International Tables Vol C Tables 4.2.6.8 and 6.1.1.4'
 'N'  'N'   0.0061   0.0033
 'International Tables Vol C Tables 4.2.6.8 and 6.1.1.4'
 'O'  'O'   0.0106   0.0060
 'International Tables Vol C Tables 4.2.6.8 and 6.1.1.4'
 'Zn'  'Zn'   0.2839   1.4301
 'International Tables Vol C Tables 4.2.6.8 and 6.1.1.4'
 'I'  'I'  -0.4742   1.8119
 'International Tables Vol C Tables 4.2.6.8 and 6.1.1.4'
 
_space_group_crystal_system       orthorhombic
_space_group_IT_number            43
_space_group_name_H-M_alt         'F d d 2'
_space_group_name_Hall            'F 2 -2d'
 
_shelx_space_group_comment
;
The symmetry employed for this shelxl refinement is uniquely defined
by the following loop, which should always be used as a source of
symmetry information in preference to the above space-group names.
They are only intended as comments.
;
 
loop_
 _space_group_symop_operation_xyz
 'x, y, z'
 '-x, -y, z'
 'x+1/4, -y+1/4, z+1/4'
 '-x+1/4, y+1/4, z+1/4'
 'x, y+1/2, z+1/2'
 '-x, -y+1/2, z+1/2'
 'x+1/4, -y+3/4, z+3/4'
 '-x+1/4, y+3/4, z+3/4'
 'x+1/2, y, z+1/2'
 '-x+1/2, -y, z+1/2'
 'x+3/4, -y+1/4, z+3/4'
 '-x+3/4, y+1/4, z+3/4'
 'x+1/2, y+1/2, z'
 '-x+1/2, -y+1/2, z'
 'x+3/4, -y+3/4, z+1/4'
 '-x+3/4, y+3/4, z+1/4'
 
_cell_length_a                    50.9980(12)
_cell_length_b                    10.2764(2)
_cell_length_c                    15.3569(4)
_cell_angle_alpha                 90
_cell_angle_beta                  90
_cell_angle_gamma                 90
_cell_volume                      8048.2(3)
_cell_formula_units_Z             8
_cell_measurement_temperature     150(2)
_cell_measurement_reflns_used    9984
_cell_measurement_theta_min        2.42
_cell_measurement_theta_max       30.51
 
_exptl_crystal_description        block
_exptl_crystal_colour             yellow
_exptl_crystal_density_meas       ?
_exptl_crystal_density_method     ?
_exptl_crystal_density_diffrn     2.939          
_exptl_crystal_F_000              6336
_exptl_transmission_factor_min    ?
_exptl_transmission_factor_max    ?
_exptl_crystal_size_max           0.170
_exptl_crystal_size_mid           0.140
_exptl_crystal_size_min           0.110
_exptl_absorpt_coefficient_mu     8.316
_shelx_estimated_absorpt_T_min    0.332
_shelx_estimated_absorpt_T_max    0.461
_exptl_absorpt_correction_type    multi-scan
_exptl_absorpt_correction_T_min   0.6422
_exptl_absorpt_correction_T_max   0.7461
_exptl_absorpt_process_details    ?
_exptl_absorpt_special_details    ?
_diffrn_ambient_temperature       150(2)
_diffrn_radiation_wavelength      0.71073
_diffrn_radiation_type            MoK\a
_diffrn_source                   'Incoatec IuS3.0 microfocus X-ray tube'
_diffrn_measurement_device_type  'Bruker D8 Venture diffractometer'
_diffrn_measurement_method       '\w and \f scans'
_diffrn_detector_area_resol_mean  ?
_diffrn_reflns_number             49070
_diffrn_reflns_av_unetI/netI      0.0167
_diffrn_reflns_av_R_equivalents   0.0293
_diffrn_reflns_limit_h_min        -72
_diffrn_reflns_limit_h_max        72
_diffrn_reflns_limit_k_min        -14
_diffrn_reflns_limit_k_max        14
_diffrn_reflns_limit_l_min        -21
_diffrn_reflns_limit_l_max        21
_diffrn_reflns_theta_min          2.418
_diffrn_reflns_theta_max          30.538
_diffrn_reflns_theta_full         25.500
_diffrn_measured_fraction_theta_max   1.000
_diffrn_measured_fraction_theta_full  0.999
_diffrn_reflns_Laue_measured_fraction_max    1.000
_diffrn_reflns_Laue_measured_fraction_full   0.999
_diffrn_reflns_point_group_measured_fraction_max   1.000
_diffrn_reflns_point_group_measured_fraction_full  1.000
_reflns_number_total              6155
_reflns_number_gt                 6088
_reflns_threshold_expression      'I > 2\s(I)'
_reflns_Friedel_coverage          0.933
_reflns_Friedel_fraction_max      1.000
_reflns_Friedel_fraction_full     1.000
 
_reflns_special_details
;
 Reflections were merged by SHELXL according to the crystal
 class for the calculation of statistics and refinement.
 
 _reflns_Friedel_fraction is defined as the number of unique
 Friedel pairs measured divided by the number that would be
 possible theoretically, ignoring centric projections and
 systematic absences.
;
 
_computing_data_collection      'Bruker SMART'
_computing_cell_refinement      'Bruker SMART'
_computing_data_reduction       'Bruker SAINT'
_computing_structure_solution     ?
_computing_structure_refinement 'SHELXL-2014/7 (Sheldrick, 2014)'
_computing_molecular_graphics     ?
_computing_publication_material   ?
_refine_special_details           ?
_refine_ls_structure_factor_coef  Fsqd
_refine_ls_matrix_type            full
_refine_ls_weighting_scheme       calc
_refine_ls_weighting_details
'w=1/[\s^2^(Fo^2^)+(0.0246P)^2^] where P=(Fo^2^+2Fc^2^)/3'
_atom_sites_solution_primary      ?
_atom_sites_solution_secondary    ?
_atom_sites_solution_hydrogens    geom
_refine_ls_hydrogen_treatment     constr
_refine_ls_extinction_method      none
_refine_ls_extinction_coef        .
_refine_ls_abs_structure_details
;
 Flack x determined using 2891 quotients [(I+)-(I-)]/[(I+)+(I-)]
 (Parsons, Flack and Wagner, Acta Cryst. B69 (2013) 249-259).
;
_refine_ls_abs_structure_Flack    0.000(7)
_chemical_absolute_configuration  ?
_refine_ls_number_reflns          6155
_refine_ls_number_parameters      204
_refine_ls_number_restraints      1
_refine_ls_R_factor_all           0.0138
_refine_ls_R_factor_gt            0.0135
_refine_ls_wR_factor_ref          0.0364
_refine_ls_wR_factor_gt           0.0363
_refine_ls_goodness_of_fit_ref    0.985
_refine_ls_restrained_S_all       0.984
_refine_ls_shift/su_max           0.002
_refine_ls_shift/su_mean          0.000
 
loop_
 _atom_site_label
 _atom_site_type_symbol
 _atom_site_fract_x
 _atom_site_fract_y
 _atom_site_fract_z
 _atom_site_U_iso_or_equiv
 _atom_site_adp_type
 _atom_site_occupancy
 _atom_site_site_symmetry_order  
 _atom_site_calc_flag
 _atom_site_refinement_flags_posn
 _atom_site_refinement_flags_adp
 _atom_site_refinement_flags_occupancy
 _atom_site_disorder_assembly
 _atom_site_disorder_group
I1 I 0.34279(2) 0.13902(2) 0.54977(2) 0.02678(6) Uani 1 1 d . . . . .
N1 N 0.25854(6) 0.0995(3) 0.3909(2) 0.0186(5) Uani 1 1 d . . . . .
C1 C 0.29798(6) 0.3524(3) 0.5232(2) 0.0152(6) Uani 1 1 d . . . . .
O1 O 0.27761(5) 0.2961(2) 0.55353(18) 0.0182(4) Uani 1 1 d . . . . .
Zn1 Zn 0.2500 0.2500 0.47120(4) 0.01367(10) Uani 1 2 d S T P . .
I2 I 0.39501(2) 0.26655(2) 0.67453(2) 0.02145(5) Uani 1 1 d . . . . .
C2 C 0.31747(6) 0.3977(3) 0.5923(2) 0.0136(5) Uani 1 1 d . . . . .
O2 O 0.30325(5) 0.3724(3) 0.44612(17) 0.0208(5) Uani 1 1 d . . . . .
I3 I 0.38192(2) 0.53844(2) 0.80868(2) 0.02367(5) Uani 1 1 d . . . . .
C3 C 0.33943(6) 0.3217(3) 0.6103(2) 0.0144(6) Uani 1 1 d . . . . .
I4 I 0.32610(2) 0.72895(2) 0.76785(2) 0.02432(6) Uani 1 1 d . . . . .
C4 C 0.35918(6) 0.3662(3) 0.6660(2) 0.0144(6) Uani 1 1 d . . . . .
C5 C 0.35509(6) 0.4824(3) 0.7124(2) 0.0146(6) Uani 1 1 d . . . . .
I5 I 0.28448(2) 0.64068(2) 0.58862(2) 0.02415(5) Uani 1 1 d . . . . .
C9 C 0.24538(7) -0.0215(3) 0.2644(2) 0.0211(7) Uani 1 1 d . . . . .
C8 C 0.22619(9) -0.0379(4) 0.1910(3) 0.0298(8) Uani 1 1 d . . . . .
H8A H 0.2102 -0.0789 0.2130 0.045 Uiso 1 1 calc R U . . .
H8B H 0.2340 -0.0930 0.1458 0.045 Uiso 1 1 calc R U . . .
H8C H 0.2219 0.0475 0.1664 0.045 Uiso 1 1 calc R U . . .
C7 C 0.31473(6) 0.5182(3) 0.6324(2) 0.0143(6) Uani 1 1 d . . . . .
C6 C 0.33262(6) 0.5592(3) 0.6963(2) 0.0146(6) Uani 1 1 d . . . . .
C10 C 0.26708(8) -0.1023(4) 0.2760(3) 0.0238(7) Uani 1 1 d . . . . .
H10 H 0.2703 -0.1707 0.2358 0.029 Uiso 1 1 calc R U . . .
C11 C 0.28399(7) -0.0838(4) 0.3456(3) 0.0234(7) Uani 1 1 d . . . . .
C12 C 0.30745(9) -0.1708(5) 0.3593(4) 0.0389(11) Uani 1 1 d . . . . .
H12A H 0.3016 -0.2548 0.3826 0.058 Uiso 1 1 calc R U . . .
H12B H 0.3195 -0.1298 0.4007 0.058 Uiso 1 1 calc R U . . .
H12C H 0.3164 -0.1844 0.3037 0.058 Uiso 1 1 calc R U . . .
C13 C 0.27892(7) 0.0182(4) 0.4022(3) 0.0218(7) Uani 1 1 d . . . . .
H13 H 0.2902 0.0312 0.4506 0.026 Uiso 1 1 calc R U . . .
C14 C 0.24204(7) 0.0790(4) 0.3238(2) 0.0198(6) Uani 1 1 d . . . . .
H14 H 0.2275 0.1357 0.3169 0.024 Uiso 1 1 calc R U . . .
 
loop_
 _atom_site_aniso_label
 _atom_site_aniso_U_11
 _atom_site_aniso_U_22
 _atom_site_aniso_U_33
 _atom_site_aniso_U_23
 _atom_site_aniso_U_13
 _atom_site_aniso_U_12
I1 0.02303(11) 0.02011(11) 0.03721(14) -0.01454(10) -0.00829(10) 0.00512(8)
N1 0.0155(13) 0.0233(14) 0.0170(13) -0.0018(11) 0.0013(11) 0.0007(11)
C1 0.0120(13) 0.0172(14) 0.0163(14) -0.0031(11) -0.0021(11) 0.0016(11)
O1 0.0139(10) 0.0205(11) 0.0204(11) 0.0009(9) -0.0029(10) -0.0048(9)
Zn1 0.0123(2) 0.0162(2) 0.0126(2) 0.000 0.000 -0.00193(18)
I2 0.01699(10) 0.02232(11) 0.02503(11) -0.00512(9) -0.00695(8) 0.00676(8)
C2 0.0103(12) 0.0167(14) 0.0139(13) 0.0006(11) -0.0009(11) -0.0010(10)
O2 0.0160(11) 0.0317(14) 0.0148(11) -0.0025(9) -0.0012(9) -0.0019(9)
I3 0.02454(11) 0.02105(10) 0.02540(11) -0.00715(9) -0.01182(9) 0.00114(9)
C3 0.0128(13) 0.0126(13) 0.0178(14) -0.0022(11) -0.0008(11) 0.0006(11)
I4 0.02280(11) 0.02083(11) 0.02933(12) -0.01254(9) -0.00130(9) 0.00453(8)
C4 0.0125(13) 0.0141(13) 0.0164(14) 0.0006(11) -0.0030(11) 0.0024(10)
C5 0.0125(13) 0.0155(14) 0.0157(14) -0.0027(11) -0.0026(11) -0.0020(11)
I5 0.01946(10) 0.02150(11) 0.03147(12) -0.00079(9) -0.00523(9) 0.00735(8)
C9 0.0227(17) 0.0201(16) 0.0206(16) -0.0042(13) 0.0002(14) -0.0018(13)
C8 0.031(2) 0.032(2) 0.0260(19) -0.0087(15) -0.0053(16) -0.0014(17)
C7 0.0123(13) 0.0142(14) 0.0165(14) 0.0001(11) 0.0004(11) 0.0003(11)
C6 0.0139(14) 0.0143(14) 0.0157(14) -0.0031(11) 0.0029(11) 0.0010(11)
C10 0.0273(18) 0.0199(16) 0.0242(18) -0.0021(13) 0.0062(14) 0.0015(14)
C11 0.0199(16) 0.0190(16) 0.0314(19) 0.0017(15) 0.0044(15) 0.0026(13)
C12 0.033(2) 0.038(2) 0.046(3) 0.004(2) 0.004(2) 0.019(2)
C13 0.0172(15) 0.0248(17) 0.0235(17) -0.0017(13) 0.0007(13) 0.0022(13)
C14 0.0186(15) 0.0215(16) 0.0193(16) -0.0036(12) -0.0003(12) 0.0005(12)
 
_geom_special_details
;
 All esds (except the esd in the dihedral angle between two l.s. planes)
 are estimated using the full covariance matrix.  The cell esds are taken
 into account individually in the estimation of esds in distances, angles
 and torsion angles; correlations between esds in cell parameters are only
 used when they are defined by crystal symmetry.  An approximate (isotropic)
 treatment of cell esds is used for estimating esds involving l.s. planes.
;
 
loop_
 _geom_bond_atom_site_label_1
 _geom_bond_atom_site_label_2
 _geom_bond_distance
 _geom_bond_site_symmetry_2
 _geom_bond_publ_flag
I1 C3 2.102(3) . ?
N1 C13 1.345(5) . ?
N1 C14 1.346(5) . ?
N1 Zn1 2.026(3) . ?
C1 O2 1.231(4) . ?
C1 O1 1.277(4) . ?
C1 C2 1.527(4) . ?
O1 Zn1 1.951(2) . ?
Zn1 O1 1.951(2) 14 ?
Zn1 N1 2.026(3) 14 ?
I2 C4 2.099(3) . ?
C2 C7 1.390(4) . ?
C2 C3 1.393(4) . ?
I3 C5 2.094(3) . ?
C3 C4 1.398(4) . ?
I4 C6 2.088(3) . ?
C4 C5 1.406(4) . ?
C5 C6 1.414(4) . ?
I5 C7 2.102(3) . ?
C9 C14 1.388(5) . ?
C9 C10 1.395(5) . ?
C9 C8 1.502(5) . ?
C8 H8A 0.9800 . ?
C8 H8B 0.9800 . ?
C8 H8C 0.9800 . ?
C7 C6 1.404(4) . ?
C10 C11 1.387(6) . ?
C10 H10 0.9500 . ?
C11 C13 1.385(5) . ?
C11 C12 1.509(5) . ?
C12 H12A 0.9800 . ?
C12 H12B 0.9800 . ?
C12 H12C 0.9800 . ?
C13 H13 0.9500 . ?
C14 H14 0.9500 . ?
 
loop_
 _geom_angle_atom_site_label_1
 _geom_angle_atom_site_label_2
 _geom_angle_atom_site_label_3
 _geom_angle
 _geom_angle_site_symmetry_1
 _geom_angle_site_symmetry_3
 _geom_angle_publ_flag
C13 N1 C14 119.0(3) . . ?
C13 N1 Zn1 124.2(3) . . ?
C14 N1 Zn1 116.8(2) . . ?
O2 C1 O1 127.1(3) . . ?
O2 C1 C2 118.4(3) . . ?
O1 C1 C2 114.5(3) . . ?
C1 O1 Zn1 117.4(2) . . ?
O1 Zn1 O1 99.20(16) . 14 ?
O1 Zn1 N1 115.14(12) . . ?
O1 Zn1 N1 111.38(12) 14 . ?
O1 Zn1 N1 111.39(12) . 14 ?
O1 Zn1 N1 115.13(12) 14 14 ?
N1 Zn1 N1 104.98(18) . 14 ?
C7 C2 C3 119.5(3) . . ?
C7 C2 C1 121.0(3) . . ?
C3 C2 C1 119.4(3) . . ?
C2 C3 C4 121.1(3) . . ?
C2 C3 I1 118.6(2) . . ?
C4 C3 I1 120.3(2) . . ?
C3 C4 C5 118.8(3) . . ?
C3 C4 I2 120.4(2) . . ?
C5 C4 I2 120.8(2) . . ?
C4 C5 C6 120.3(3) . . ?
C4 C5 I3 119.6(2) . . ?
C6 C5 I3 120.0(2) . . ?
C14 C9 C10 117.1(4) . . ?
C14 C9 C8 119.8(3) . . ?
C10 C9 C8 123.1(3) . . ?
C9 C8 H8A 109.5 . . ?
C9 C8 H8B 109.5 . . ?
H8A C8 H8B 109.5 . . ?
C9 C8 H8C 109.5 . . ?
H8A C8 H8C 109.5 . . ?
H8B C8 H8C 109.5 . . ?
C2 C7 C6 120.8(3) . . ?
C2 C7 I5 117.7(2) . . ?
C6 C7 I5 121.4(2) . . ?
C7 C6 C5 118.8(3) . . ?
C7 C6 I4 121.0(2) . . ?
C5 C6 I4 120.2(2) . . ?
C11 C10 C9 120.7(3) . . ?
C11 C10 H10 119.7 . . ?
C9 C10 H10 119.7 . . ?
C13 C11 C10 118.1(3) . . ?
C13 C11 C12 120.6(4) . . ?
C10 C11 C12 121.3(4) . . ?
C11 C12 H12A 109.5 . . ?
C11 C12 H12B 109.5 . . ?
H12A C12 H12B 109.5 . . ?
C11 C12 H12C 109.5 . . ?
H12A C12 H12C 109.5 . . ?
H12B C12 H12C 109.5 . . ?
N1 C13 C11 122.2(3) . . ?
N1 C13 H13 118.9 . . ?
C11 C13 H13 118.9 . . ?
N1 C14 C9 122.8(3) . . ?
N1 C14 H14 118.6 . . ?
C9 C14 H14 118.6 . . ?
 
_refine_diff_density_max    0.740
_refine_diff_density_min   -0.841
_refine_diff_density_rms    0.085

_shelx_res_file
;

    BM495-1_a.res created by SHELXL-2014/7


TITL BM495-1_a.res in Fdd2
REM Old TITL BM495-1 in Fdd2
REM SHELXT solution in Fdd2
REM R1 0.087,  Rweak 0.026,  Alpha 0.001,  Orientation as input
REM Flack x =  0.012 ( 0.009 ) from Parsons' quotients
REM Formula found by SHELXT:  C26 N4 O4 Zn I10
CELL  0.71073  50.9980  10.2764  15.3569   90.000   90.000   90.000
ZERR   8.000   0.0012   0.0002   0.0004    0.000    0.000    0.000
LATT -4
SYMM -X, -Y, Z
SYMM 1/4+X, 1/4-Y, 1/4+Z
SYMM 1/4-X, 1/4+Y, 1/4+Z
SFAC C H N O ZN I
UNIT 224 144 16 32 8 80
SIZE  0.11 0.14 0.17
TEMP -123.150
L.S. 10
BOND $H
LIST 6
FMAP 2
PLAN 10

OMIT  4   0   0

ACTA 51

WGHT    0.024600
FVAR       0.05405
I1    6    0.342790    0.139023    0.549770    11.00000    0.02303    0.02011 =
         0.03721   -0.01454   -0.00829    0.00512
N1    3    0.258541    0.099486    0.390870    11.00000    0.01549    0.02327 =
         0.01695   -0.00178    0.00130    0.00069
C1    1    0.297985    0.352381    0.523212    11.00000    0.01198    0.01717 =
         0.01631   -0.00306   -0.00206    0.00160
O1    4    0.277610    0.296066    0.553530    11.00000    0.01387    0.02048 =
         0.02038    0.00091   -0.00291   -0.00479
ZN1   5    0.250000    0.250000    0.471195    10.50000    0.01227    0.01617 =
         0.01257    0.00000    0.00000   -0.00193
I2    6    0.395014    0.266547    0.674528    11.00000    0.01699    0.02232 =
         0.02503   -0.00512   -0.00695    0.00676
C2    1    0.317470    0.397711    0.592303    11.00000    0.01027    0.01666 =
         0.01391    0.00062   -0.00088   -0.00099
O2    4    0.303252    0.372367    0.446123    11.00000    0.01599    0.03173 =
         0.01482   -0.00250   -0.00115   -0.00191
I3    6    0.381919    0.538436    0.808682    11.00000    0.02454    0.02105 =
         0.02540   -0.00715   -0.01182    0.00114
C3    1    0.339430    0.321666    0.610339    11.00000    0.01276    0.01260 =
         0.01784   -0.00224   -0.00082    0.00056
I4    6    0.326103    0.728955    0.767852    11.00000    0.02280    0.02083 =
         0.02933   -0.01254   -0.00130    0.00453
C4    1    0.359176    0.366204    0.666034    11.00000    0.01254    0.01409 =
         0.01643    0.00057   -0.00298    0.00244
C5    1    0.355095    0.482442    0.712449    11.00000    0.01249    0.01553 =
         0.01574   -0.00274   -0.00262   -0.00198
I5    6    0.284477    0.640680    0.588616    11.00000    0.01946    0.02150 =
         0.03147   -0.00079   -0.00523    0.00735
C9    1    0.245377   -0.021496    0.264425    11.00000    0.02272    0.02008 =
         0.02064   -0.00419    0.00018   -0.00181
C8    1    0.226194   -0.037887    0.191037    11.00000    0.03149    0.03205 =
         0.02595   -0.00875   -0.00529   -0.00145
AFIX 133
H8A   2    0.210159   -0.078908    0.213017    11.00000   -1.50000
H8B   2    0.233968   -0.092969    0.145791    11.00000   -1.50000
H8C   2    0.221939    0.047521    0.166416    11.00000   -1.50000
AFIX   0
C7    1    0.314733    0.518186    0.632416    11.00000    0.01233    0.01417 =
         0.01650    0.00008    0.00037    0.00034
C6    1    0.332620    0.559230    0.696254    11.00000    0.01389    0.01430 =
         0.01568   -0.00307    0.00287    0.00098
C10   1    0.267081   -0.102307    0.276009    11.00000    0.02726    0.01986 =
         0.02418   -0.00207    0.00620    0.00151
AFIX  43
H10   2    0.270305   -0.170728    0.235811    11.00000   -1.20000
AFIX   0
C11   1    0.283994   -0.083752    0.345613    11.00000    0.01993    0.01898 =
         0.03139    0.00173    0.00441    0.00265
C12   1    0.307453   -0.170834    0.359341    11.00000    0.03289    0.03772 =
         0.04599    0.00410    0.00378    0.01858
AFIX 133
H12A  2    0.301637   -0.254833    0.382574    11.00000   -1.50000
H12B  2    0.319524   -0.129781    0.400701    11.00000   -1.50000
H12C  2    0.316434   -0.184448    0.303665    11.00000   -1.50000
AFIX   0
C13   1    0.278920    0.018211    0.402154    11.00000    0.01723    0.02476 =
         0.02355   -0.00169    0.00066    0.00221
AFIX  43
H13   2    0.290224    0.031153    0.450554    11.00000   -1.20000
AFIX   0
C14   1    0.242039    0.078985    0.323845    11.00000    0.01857    0.02150 =
         0.01927   -0.00363   -0.00027    0.00051
AFIX  43
H14   2    0.227481    0.135717    0.316899    11.00000   -1.20000
AFIX   0
HKLF 4

REM  BM495-1_a.res in Fdd2
REM R1 =  0.0135 for    6088 Fo > 4sig(Fo)  and  0.0138 for all    6155 data
REM    204 parameters refined using      1 restraints

END

WGHT      0.0110     13.2762

REM Highest difference peak  0.740,  deepest hole -0.841,  1-sigma level  0.085
Q1    1   0.3500  0.1885  0.5194  11.00000  0.05    0.74
Q2    1   0.3849  0.2370  0.7010  11.00000  0.05    0.62
Q3    1   0.3188  0.7462  0.7320  11.00000  0.05    0.53
Q4    1   0.2765  0.6100  0.6316  11.00000  0.05    0.49
Q5    1   0.3222  0.5484  0.6700  11.00000  0.05    0.39
Q6    1   0.3282  0.3584  0.6020  11.00000  0.05    0.38
Q7    1   0.2758  0.6141  0.5501  11.00000  0.05    0.35
Q8    1   0.1682  0.0326  0.1700  11.00000  0.05    0.31
Q9    1   0.3490  0.3548  0.6314  11.00000  0.05    0.29
Q10   1   0.3498  0.1341  0.5906  11.00000  0.05    0.29
;
_shelx_res_checksum   92667

_shelx_hkl_file
;
   0  -2   0    0.80    0.60
   0   2   0    5.70    1.20
   0   2   0    3.20    0.90
   0  -2   0    2.50    0.80
   0  -2   0    0.20    0.60
   0   2   0    1.30    0.30
   0  -2   0    2.30    0.40
   0  -4   0  333.47   12.80
   0   4   0  318.87   11.40
   0   4   0  328.57   13.00
   0  -4   0  318.77   12.80
   0  -4   0  331.97   11.40
   0  -4   0  327.77    9.30
   0   4   0  324.37   12.70
   0  -4   0  329.57    9.30
   0  -6   0    4.30    1.60
   0   6   0   -0.30    1.00
   0   6   0    2.40    1.50
   0  -6   0    1.50    0.30
   0  -6   0    3.20    1.90
   0   6   0    0.50    1.00
   0   8   0 3223.38   95.19
   0   8   0 3265.67   90.39
   0  -8   0 3124.59   89.99
   0  -8   0 3369.06   94.79
   0 -10   0    2.50    2.80
   0  10   0    1.80    2.60
   0  10   0    0.00    1.60
   0  12   0  241.28   13.00
   0 -12   0  237.58   16.60
   0  12   0  216.38   16.90
   0 -14   0   -0.50    3.30
   0  14   0    1.40    2.70
   0  14   0    2.80    4.10
   0   0   2    4.80    0.90
   0   0   2    1.90    0.60
   0   0  -2    1.00    0.50
   0   0   2    3.50    0.60
   0   0   2    2.50    0.60
   0   2   2 2970.80   88.29
   0   2  -2 3051.99   87.79
   0  -2   2 2835.82   84.59
   0   2   2 3007.60   82.69
   0  -2   2 2886.11   86.49
   0  -2  -2 3141.39   82.69
   0  -2   2 2984.20   87.59
   0   2   2 2941.31   87.39
   0  -2  -2 3211.98   89.19
   0  -2   2 3029.50   87.19
   0   2  -2 3009.40   84.89
   0  -2  -2 3084.29   87.99
   0  -4  -2    1.80    1.20
   0   4   2    3.20    1.00
   0   4   2    1.70    1.10
   0   4  -2    2.30    1.50
   0  -4  -2    0.90    1.00
   0  -4   2    3.70    1.10
   0   4  -2    2.40    1.00
   0  -4  -2    1.20    0.70
   0  -4   2    5.60    2.00
   0  -4  -2    1.40    0.90
   0   4   2    1.60    1.00
   0  -4   2    3.50    1.50
   0  -4  -2    1.20    1.20
   0   4  -2    0.30    0.90
   0   6   2 1937.41   58.19
   0  -6  -2 1930.51   55.39
   0  -6  -2 1851.11   57.09
   0  -6   2 1951.10   54.19
   0   6  -2 1946.31   54.29
   0   6  -2 1973.90   58.19
   0  -6  -2 1979.20   56.99
   0   6   2 1880.11   56.49
   0  -6  -2 1920.91   52.49
   0  -6   2 1990.20   58.19
   0   6   2 1934.41   52.59
   0   6   2 1858.51   55.19
   0  -8  -2    0.60    0.80
   0   8  -2    2.70    1.40
   0  -8   2    0.20    1.20
   0  -8  -2    1.80    0.90
   0  -8  -2    0.70    1.70
   0   8  -2    3.30    2.30
   0  -8   2   -1.60    1.30
   0   8   2    0.90    1.70
   0   8   2    3.90    1.90
   0  10   2  302.97   14.70
   0 -10  -2  328.37   17.80
   0  10  -2  283.37   17.60
   0  10  -2  301.87   13.80
   0 -10   2  316.07   17.90
   0  10   2  297.27   18.10
   0 -12   2    0.70    3.10
   0  12   2   -1.00    1.90
   0  12  -2    3.00    2.50
   0  12  -2   -1.90    2.60
   0 -12  -2    1.40    2.70
   0  12   2   -1.40    2.80
   0  14  -2  476.85   20.30
   0 -14  -2  499.95   27.20
   0 -14   2  474.35   27.50
   0  14   2  472.85   21.60
   0  14   2  483.85   28.70
   0  14  -2  499.65   28.90
   0   0  -4 5285.47  148.59
   0   0   4 5492.55  149.09
   0   0   4 5627.54  151.98
   0   0  -4 5326.07  151.88
   0   2   4    3.30    0.90
   0   2  -4    2.60    0.90
   0  -2   4    2.00    1.00
   0   2  -4    3.60    1.30
   0  -2   4    0.90    0.70
   0   2   4    2.30    1.10
   0  -2  -4    0.70    0.90
   0  -2  -4    1.70    0.90
   0  -2   4    2.50    0.90
   0  -2   4    1.50    0.90
   0  -2  -4    0.10    0.70
   0   2  -4    0.70    0.70
   0   2  -4    1.90    0.70
   0  -2  -4    0.30    0.70
   0   2   4    0.20    0.80
   0  -2  -4    0.30    0.60
   0  -4   4 4702.03  120.49
   0  -4  -4 4579.54  124.99
   0   4  -4 4595.44  120.39
   0   4   4 4760.52  122.89
   0   4   4 4668.03  125.29
   0  -4  -4 4547.94  123.49
   0   4  -4 4697.53  124.59
   0   4  -4 4676.13  122.09
   0  -4  -4 4412.76  122.39
   0   4   4 4517.05  123.59
   0  -4  -4 4575.34  123.09
   0  -4   4 4546.65  121.99
   0  -4  -4 4543.65  122.99
   0  -4   4 4640.34  124.19
   0   6   4    1.50    1.80
   0  -6  -4    0.70    0.90
   0  -6  -4    3.40    1.50
   0  -6   4    5.00    2.40
   0  -6  -4    0.00    1.00
   0   6  -4    4.60    2.20
   0   6   4    2.40    1.30
   0   6   4    3.20    1.90
   0  -6   4    4.00    1.40
   0  -6  -4    4.50    1.80
   0   8   4   21.50    3.90
   0  -8  -4   27.40    5.00
   0  -8   4   26.60    3.40
   0   8  -4   24.70    5.30
   0  -8  -4   22.90    3.00
   0  -8   4   22.00    5.10
   0   8   4   22.20    2.90
   0   8  -4   26.60    3.40
   0   8   4   25.40    6.10
   0  10   4   -0.10    1.70
   0  10  -4    4.10    1.80
   0  10   4    0.90    2.40
   0 -10   4    0.40    2.50
   0  10  -4    4.00    2.70
   0 -10  -4    0.50    1.30
   0 -10  -4   -0.30    1.10
   0 -10  -4    4.50    2.70
   0 -12   4  668.63   32.10
   0  12   4  655.63   27.10
   0 -12  -4  708.23   31.00
   0  12  -4  695.63   25.30
   0  12  -4  694.73   32.60
   0  12   4  648.64   32.40
   0  14   4    1.80    3.40
   0  14  -4    5.60    4.10
   0 -14  -4    1.10    3.20
   0 -14   4    4.20    3.80
   0  14   4   -3.60    3.10
   0   0  -6    0.40    0.80
   0   0  -6    1.40    1.10
   0   0   6    6.00    1.60
   0   0  -6    1.10    0.80
   0   0   6    0.30    0.90
   0   0   6    4.50    1.20
   0   0  -6    1.00    0.70
   0   2  -6  266.97   10.50
   0  -2   6  263.37   10.60
   0   2   6  268.67   11.40
   0  -2  -6  271.37   11.30
   0   2   6  283.57   11.60
   0   2   6  267.47   11.30
   0  -2  -6  283.07    9.70
   0  -2  -6  282.37   11.40
   0   2  -6  274.77   10.70
   0  -2   6  254.87   10.50
   0   2  -6  250.77   10.70
   0   2   6  284.77    9.60
   0  -2  -6  289.67   11.50
   0  -2   6  264.07   10.80
   0  -2   6  266.07   10.60
   0   2  -6  263.37   10.70
   0  -4   6    2.80    1.10
   0  -4  -6    1.70    1.10
   0   4  -6    3.40    1.10
   0  -4  -6    2.40    1.50
   0   4   6    1.30    1.30
   0   4  -6    0.90    1.20
   0  -4  -6    0.20    0.90
   0   4  -6    1.40    1.10
   0   4   6    0.80    1.10
   0  -4  -6    1.00    0.90
   0  -4   6    2.50    1.30
   0  -4  -6    2.60    1.60
   0  -4   6    0.20    0.80
   0   4  -6    0.90    1.30
   0  -4   6    1.60    1.00
   0  -4  -6    4.70    2.00
   0  -6  -6  671.13   25.90
   0  -6  -6  640.74   23.20
   0  -6  -6  659.83   22.70
   0  -6  -6  676.83   23.30
   0   6  -6  629.24   19.40
   0  -6   6  597.84   21.50
   0  -6   6  668.43   25.70
   0   6   6  695.93   23.30
   0   6  -6  649.14   21.90
   0   6   6  685.33   24.40
   0   6  -6  665.23   25.10
   0  -6   6  652.43   19.60
   0   8   6    1.00    2.10
   0  -8  -6   -1.70    1.60
   0   8  -6    1.00    1.30
   0   8   6    2.30    1.80
   0   8  -6    5.20    3.00
   0  -8  -6    1.20    1.60
   0  -8   6    3.50    2.70
   0  -8  -6    3.30    1.90
   0  -8   6    1.20    1.40
   0   8   6    5.70    2.50
   0  10  -6    1.30    2.40
   0 -10  -6    6.50    3.20
   0 -10  -6    2.20    3.20
   0 -10   6    5.10    3.70
   0  10   6    0.60    2.30
   0  10  -6    2.10    1.60
   0 -10  -6    2.20    1.90
   0  10   6   -1.20    2.30
   0 -12  -6    1.80    2.70
   0 -12   6    2.20    3.40
   0  12  -6   -0.70    1.90
   0 -12  -6    0.90    1.50
   0  12  -6    0.60    2.90
   0 -12  -6   -2.90    3.10
   0  12   6    1.00    2.60
   0  12   6    6.10    4.40
   0 -14  -6  383.66   22.60
   0  14   6  322.37   18.90
   0 -14  -6  390.56   26.10
   0  14  -6  336.17   23.20
   0 -14   6  345.97   23.50
   0   0   8 4780.82  125.19
   0   0  -8 4761.02  127.79
   0   0  -8 4702.63  126.49
   0   0  -8 4540.65  124.99
   0   0   8 4818.12  127.99
   0   0  -8 4569.14  127.29
   0   0  -8 4907.91  127.69
   0   0   8 4591.44  126.39
   0   2  -8    7.90    2.10
   0  -2  -8    0.80    1.20
   0  -2  -8    6.40    2.00
   0  -2  -8    4.10    1.20
   0  -2   8    4.60    1.60
   0   2   8    0.70    1.00
   0   2   8    0.90    0.80
   0   2  -8    1.80    1.20
   0   2   8    0.00    1.40
   0  -2   8    0.50    1.10
   0  -2  -8    0.70    1.10
   0   2  -8    1.50    1.20
   0   2   8    3.60    1.80
   0   2  -8    4.40    1.50
   0  -2   8    3.10    1.60
   0   2  -8    1.60    1.40
   0  -4   8 1142.79   34.20
   0  -4   8 1176.88   36.90
   0   4  -8 1155.68   34.80
   0  -4   8 1079.59   35.30
   0   4   8 1133.99   33.50
   0  -4  -8 1112.89   39.30
   0   4   8 1125.89   36.20
   0   4  -8 1098.59   35.80
   0   4   8 1121.49   36.70
   0  -4  -8 1098.79   37.10
   0  -4   8 1083.89   34.60
   0   4  -8 1124.49   34.10
   0  -4  -8 1137.59   33.80
   0   6   8    9.90    3.10
   0  -6  -8    1.70    1.50
   0  -6  -8    1.60    1.50
   0  -6   8    0.60    0.90
   0   6  -8    5.00    2.10
   0   6   8   -1.10    1.30
   0  -6  -8   -1.30    1.40
   0  -6   8    1.50    1.40
   0   6  -8    0.40    0.90
   0  -6   8    0.50    1.70
   0   6  -8    1.40    1.40
   0   8   8   83.59    8.10
   0  -8   8   81.29    8.90
   0   8  -8   85.09    4.10
   0   8  -8   94.59    6.80
   0  -8  -8   89.49    7.50
   0   8   8   81.29    7.30
   0   8  -8   94.09    9.00
   0  -8  -8  104.79   10.10
   0   8  -8   75.49    4.00
   0 -10  -8    2.90    2.30
   0 -10  -8    3.50    3.20
   0  10   8    2.10    2.10
   0  10  -8    2.70    3.10
   0  10   8    0.30    1.70
   0 -10   8    2.60    2.70
   0  10  -8    0.70    1.70
   0  12  -8  361.96   22.20
   0 -12   8  384.06   23.40
   0  12   8  350.16   19.60
   0 -12  -8  339.47   16.30
   0 -12  -8  364.96   20.20
   0 -12  -8  377.76   24.20
   0  12  -8  346.77   16.10
   0   0  10   -0.20    0.90
   0   0  10    1.10    0.90
   0   0 -10    1.80    1.50
   0   0 -10    1.70    1.10
   0   0  10    2.30    1.50
   0   0 -10    4.50    1.90
   0  -2  10 5009.50  137.19
   0  -2 -10 4926.41  134.29
   0   2 -10 4855.21  136.69
   0   2  10 5087.99  139.19
   0  -2  10 4971.00  137.99
   0  -2 -10 5173.38  138.49
   0  -2  10 5021.00  136.89
   0   2  10 5277.87  139.79
   0   2  10 5184.38  134.89
   0   2 -10 5150.98  137.29
   0   2 -10 5112.09  138.19
   0   2  10 4939.01  137.89
   0   4  10    0.80    1.20
   0  -4 -10   -0.40    1.80
   0  -4  10    1.40    1.40
   0   4  10    0.70    1.70
   0   4 -10    6.80    2.40
   0   4  10    2.90    1.40
   0   4 -10    1.80    1.80
   0  -4 -10   -0.50    0.80
   0  -4  10    1.40    1.90
   0  -6 -10 1103.19   34.70
   0   6  10 1151.38   39.00
   0   6 -10 1050.79   34.10
   0  -6 -10 1071.69   34.90
   0  -6  10  971.80   44.30
   0  -6  10 1174.78   34.80
   0   6  10 1134.59   38.30
   0   6 -10 1105.49   35.70
   0  -6 -10 1082.09   39.60
   0   6 -10 1097.39   38.10
   0  -8  10   -1.70    2.00
   0  -8 -10    0.70    1.80
   0   8 -10   -0.90    1.40
   0   8  10    2.20    2.20
   0   8 -10    4.20    2.60
   0   8 -10    0.00    1.80
   0   8  10   -0.90    1.90
   0  -8  10   -0.30    1.00
   0  -8 -10    5.60    3.30
   0  10 -10  110.49   10.70
   0  10  10  112.39   10.60
   0  10  10  102.49    8.90
   0 -10  10  103.69   11.20
   0 -10 -10   99.09    9.00
   0  10 -10   97.49    7.90
   0 -10 -10   95.79   11.00
   0  12  10    0.60    3.20
   0 -12 -10    1.90    2.90
   0  12 -10    4.80    3.90
   0 -12 -10    2.00    3.70
   0 -12 -10   -1.20    2.40
   0 -12  10    4.40    4.20
   0   0 -12  167.08    8.80
   0   0 -12  183.28   10.30
   0   0  12  190.28    9.10
   0   0  12  174.98   11.20
   0   0 -12  167.98   10.80
   0  -2 -12    1.20    1.60
   0  -2 -12    3.00    1.40
   0   2 -12    1.20    1.50
   0  -2  12    2.20    1.80
   0   2 -12    3.00    1.90
   0  -2  12    2.60    2.10
   0   2  12    1.30    1.10
   0   4  12  134.09    7.20
   0   4  12  123.99    9.80
   0  -4 -12  125.29    7.10
   0   4 -12  138.59    9.40
   0  -4  12  147.49    9.90
   0  -4  12  145.39    9.40
   0   4  12  126.19   10.10
   0  -4 -12  145.29   10.50
   0   4 -12  155.48    9.90
   0  -6 -12    0.50    2.10
   0  -6 -12    1.10    1.80
   0  -6 -12    1.20    1.30
   0  -6  12    1.80    1.60
   0  -6  12    2.90    2.50
   0   6 -12   -0.10    1.70
   0   6  12    0.00    1.80
   0   6  12    1.30    2.40
   0   6 -12   -0.10    1.80
   0   8  12  233.98   14.80
   0  -8  12  257.87   11.80
   0  -8 -12  249.08   12.90
   0  -8  12  249.68   16.60
   0   8 -12  236.38   15.40
   0   8  12  250.97   16.40
   0   8 -12  261.87   13.70
   0  -8 -12  263.27   17.20
   0 -10 -12    4.50    3.00
   0 -10 -12    3.10    3.50
   0  10  12   -1.90    2.30
   0  10  12    8.10    3.70
   0  10 -12   -1.20    2.50
   0  10 -12   -1.50    2.10
   0 -12 -12  157.88   12.30
   0  12 -12  160.98   10.80
   0 -12  12  154.68   15.30
   0  12 -12  177.38   15.40
   0  12  12  133.59   12.70
   0 -12 -12  145.09   15.50
   0 -12 -12  133.99   11.90
   0   0  14    0.70    1.40
   0   0 -14    0.10    1.40
   0   0  14    2.70    2.50
   0   0 -14   -1.10    1.10
   0   0 -14    1.20    1.70
   0  -2 -14  652.13   27.60
   0  -2  14  648.64   24.30
   0  -2  14  648.44   26.50
   0   2  14  627.14   27.20
   0   2  14  652.43   21.60
   0  -2 -14  650.73   25.90
   0   2 -14  669.03   26.60
   0  -2 -14  606.54   21.40
   0   2 -14  647.04   25.00
   0   4  14    0.00    2.00
   0  -4  14    1.50    2.30
   0   4  14   -0.80    1.10
   0  -4 -14    0.80    1.50
   0   4 -14    0.70    1.90
   0  -4 -14    2.30    2.00
   0   4 -14    2.80    2.50
   0  -4 -14    1.00    2.30
   0   4  14    1.10    2.30
   0  -4  14    4.10    2.30
   0  -6  14  218.18   14.80
   0   6 -14  234.88   13.90
   0  -6 -14  240.08   11.40
   0  -6  14  228.78   14.60
   0  -6 -14  225.28   10.90
   0   6  14  241.38   15.70
   0   6  14  233.78   15.80
   0   6 -14  256.37   15.10
   0  -6 -14  252.27   16.40
   0  -8 -14    2.90    2.10
   0  -8  14    1.90    2.10
   0   8  14    0.50    3.10
   0   8 -14    0.50    2.30
   0  -8 -14   -0.40    2.90
   0  -8  14    4.80    3.70
   0   8  14    2.80    3.10
   0   8 -14   -0.80    2.60
   0  10 -14  278.47   13.00
   0 -10  14  308.17   21.00
   0  10  14  280.37   18.00
   0  10  14  288.87   19.70
   0 -10 -14  318.97   21.30
   0  10 -14  319.37   16.30
   0 -10 -14  302.67   15.50
   0   0 -16   47.60    6.10
   0   0 -16   44.80    7.40
   0   0  16   52.09    5.20
   0   0  16   49.70    8.00
   0   2  16    0.60    1.50
   0  -2  16    1.40    1.80
   0  -2 -16    1.70    1.70
   0   2  16    0.30    2.60
   0  -2 -16    1.60    2.20
   0  -2 -16    1.00    2.10
   0  -2  16    3.50    2.80
   0   2 -16    5.20    3.00
   0  -4  16  144.29   10.80
   0  -4 -16  157.88   12.50
   0  -4 -16  147.09   12.80
   0   4 -16  148.59   11.00
   0   4  16  153.98    7.80
   0   4 -16  140.79   11.40
   0  -4 -16  133.19    7.50
   0  -4  16  151.58   11.40
   0   4  16  156.38   12.80
   0   6 -16    0.30    2.20
   0  -6 -16   -4.90    2.20
   0   6 -16    1.70    2.50
   0  -6  16    2.40    2.80
   0  -6  16   -2.50    1.90
   0  -6 -16    2.00    1.80
   0  -6 -16    0.00    2.90
   0   6  16   -2.00    2.20
   0  -8 -16   12.70    3.30
   0  -8 -16   19.00    5.40
   0   8  16   16.50    6.00
   0   8  16   10.40    5.10
   0   8 -16   18.90    5.20
   0  -8 -16   14.80    5.70
   0   8 -16   20.30    5.30
   0  -8  16   11.20    5.00
   0  -8  16   11.30    3.50
   0 -10  16   -0.40    4.10
   0 -10 -16    0.10    4.10
   0  10 -16   -6.00    3.10
   0  10 -16   -1.00    3.40
   0 -10 -16   -4.30    4.10
   0  10  16   -2.00    3.10
   0  10  16    1.30    3.30
   0   0  18    0.20    1.90
   0   0 -18    3.50    2.30
   0   0  18    1.50    2.30
   0   0 -18   -1.20    2.50
   0   2 -18  236.28   14.40
   0  -2 -18  252.07   15.60
   0  -2  18  237.38   16.40
   0  -2  18  228.38   13.50
   0   2  18  247.48   11.00
   0  -2 -18  268.17   17.90
   0   2 -18  246.98   16.40
   0   2  18  259.17   17.70
   0   4 -18    2.30    3.10
   0   4 -18   -0.70    2.10
   0  -4 -18    0.90    1.50
   0  -4  18    1.80    2.80
   0  -4 -18   -0.30    3.30
   0  -4  18   -1.30    2.80
   0   4  18   -2.90    2.00
   0  -4 -18    6.00    3.50
   0   6  18   97.99   11.40
   0  -6  18   65.19    8.60
   0   6 -18   69.49    8.60
   0  -6 -18   96.79   11.90
   0   6 -18   92.99    9.60
   0  -6  18   69.09    8.10
   0  -6 -18   87.39   10.30
   0   8 -18   -2.50    5.20
   0  -8  18   -4.10    3.60
   0  -8 -18   -1.60    3.20
   0   8  18    2.30    3.50
   0   8 -18    2.50    3.80
   0  -8  18    4.50    2.90
   0  -8 -18    5.50    4.30
   0   0  20   84.99    7.00
   0   0  20   83.39   10.80
   0   0 -20   99.49    9.60
   0   0 -20   98.49   11.30
   0  -2 -20    0.60    3.00
   0  -2  20    3.20    3.80
   0   2 -20    0.20    2.80
   0  -2 -20    1.90    3.50
   0   2  20   -0.50    2.70
   0  -2  20    0.10    2.70
   0   2  20   -2.40    1.90
   0   2 -20   -2.10    2.80
   0   4 -20  563.54   26.90
   0  -4 -20  627.94   32.30
   0   4  20  585.74   31.00
   0  -4  20  619.94   27.00
   0   4 -20  655.13   30.20
   0  -4 -20  652.73   29.50
   0  -4  20  595.84   29.00
   0   6  20   -1.80    3.30
   0  -6  20    1.40    2.90
   0   6 -20   -1.80    4.00
   0  -6 -20    4.10    4.50
   0   6 -20   -1.80    3.60
   0  -6 -20    3.70    4.10
   1  -1   1  571.84   16.10
  -1   1   1  591.74   15.70
   1   1  -1  588.14   15.10
  -1   1   1  587.94   15.80
   1   1  -1  604.14   16.10
  -1   1   1  584.24   15.90
  -1  -1  -1  545.15   16.80
   1   1  -1  597.64   15.70
  -1   1   1  594.44   16.10
   1  -1   1  566.54   16.10
  -1  -1  -1  518.25   16.60
  -1  -1  -1  506.25   15.80
  -1  -1   1  585.34   16.00
   1  -1  -1  573.04   16.10
  -1   1  -1  544.65   15.30
   1   1   1  527.75   15.50
   1  -1  -1  586.54   15.80
  -1   1  -1  552.84   16.50
   1  -1  -1  602.24   16.00
  -1   1  -1  534.35   15.20
   1   1   1  551.44   16.20
  -1  -1   1  598.04   16.20
  -1   1  -1  551.04   16.00
   1   1   1  548.55   15.60
   1   1   1  555.84   15.90
   1  -1  -1  559.94   16.00
  -1   3   1   19.80    1.50
   1  -3   1   17.50    1.60
   1  -3   1   17.70    2.70
  -1  -3  -1   10.60    2.00
   1  -3   1   16.20    2.20
  -1  -3  -1   15.50    1.90
   1   3  -1   17.10    2.20
  -1   3   1   18.20    1.80
   1   3  -1   19.60    1.80
  -1  -3  -1   13.40    2.10
   1   3  -1   17.20    2.20
  -1   3   1   23.10    2.50
  -1  -3   1   18.00    2.70
  -1  -3   1   19.60    1.80
   1   3   1   16.20    1.30
   1   3   1   20.10    2.90
  -1   3  -1   15.50    2.60
   1  -3  -1   16.70    1.50
   1  -3  -1   18.10    1.80
   1  -3  -1   20.50    2.30
   1  -3  -1   20.90    2.50
  -1   3  -1   18.10    2.30
   1   3   1   14.00    1.90
   1   3   1   22.60    2.10
  -1   3  -1   17.60    1.50
  -1  -3   1   16.80    2.30
   1   5  -1  166.38    9.30
  -1   5   1  170.58    9.40
  -1  -5  -1  186.88    9.20
  -1   5   1  172.48    8.00
   1   5  -1  186.78    9.50
   1  -5   1  161.78    9.20
  -1  -5  -1  175.68    8.10
   1  -5   1  157.68    9.00
   1  -5   1  167.68    7.40
  -1  -5  -1  182.48    6.30
  -1  -5  -1  195.08    9.70
   1   5   1  175.38    6.20
  -1  -5   1  176.98    9.40
   1   5   1  176.38    9.10
   1  -5  -1  181.88    9.20
  -1  -5   1  169.58    9.20
   1  -5  -1  195.58    9.80
  -1   5  -1  185.08    9.70
  -1  -5   1  171.48    7.70
   1  -5  -1  186.38    8.10
   1   5   1  169.98    8.10
  -1   5  -1  170.88    9.20
  -1   5  -1  184.08    7.70
   1   5   1  191.28    9.90
   1  -5  -1  198.78    6.50
  -1  -7  -1  527.25   21.10
   1   7  -1  543.45   19.00
   1   7  -1  560.74   22.40
  -1   7   1  541.05   22.20
   1  -7   1  513.05   21.50
  -1  -7  -1  491.45   18.90
  -1  -7  -1  508.95   15.30
  -1   7   1  549.54   19.10
   1  -7   1  486.05   18.00
  -1  -7  -1  511.15   15.30
   1   7   1  531.15   22.10
  -1   7  -1  497.05   18.20
   1  -7  -1  528.75   20.50
  -1   7  -1  494.95   21.40
   1   7   1  522.25   19.20
   1  -7  -1  577.74   21.80
  -1  -7   1  526.15   18.80
   1  -7  -1  554.04   15.60
  -1  -7   1  569.04   22.10
   1  -7  -1  546.75   15.60
  -1   9   1   44.90    7.30
   1   9  -1   31.40    4.10
  -1  -9  -1   33.80    6.10
   1   9  -1   29.70    6.00
  -1   9   1   34.70    4.30
   1  -9   1   27.30    3.60
   1  -9   1   31.30    6.20
  -1   9  -1   30.50    3.90
   1   9   1   29.30    5.90
   1  -9  -1   37.20    6.30
   1   9   1   36.70    4.60
  -1   9  -1   32.50    6.70
  -1  -9   1   34.20    6.30
  -1 -11  -1  264.47   16.90
   1  11  -1  284.47   13.70
   1 -11   1  244.58   16.50
  -1  11   1  291.07   14.00
  -1  11   1  285.47   18.50
   1  11  -1  275.27   17.90
   1  11   1  267.37   13.90
  -1  11  -1  244.28   17.20
  -1  11  -1  266.27   13.00
   1  11   1  270.67   18.00
   1 -11  -1  286.77   17.50
  -1 -11   1  246.78   16.80
   1  13  -1   54.89    6.20
  -1  13   1   65.29    7.00
   1 -13   1   46.80    9.10
   1  13  -1   64.29   11.80
  -1  13   1   65.29   11.50
  -1 -13  -1   60.99   15.90
   1  13   1   50.39    6.30
   1  13   1   52.99   10.60
   1 -13  -1   52.69   12.10
  -1  13  -1   50.19   10.00
  -1  13  -1   48.40    9.30
  -1 -13   1   56.39   10.40
  -1  -1  -3  435.46   13.30
  -1  -1  -3  433.56   13.10
   1  -1   3  389.76   12.50
   1   1  -3  415.86   12.50
  -1   1   3  429.36   13.20
  -1  -1  -3  422.46   13.10
  -1   1   3  411.16   12.20
  -1   1   3  415.56   13.10
   1   1  -3  420.16   12.60
   1   1  -3  386.86   12.70
   1  -1   3  380.46   12.40
  -1  -1  -3  437.66   11.80
   1   1  -3  405.76   12.70
   1  -1   3  386.06   12.60
   1  -1   3  366.46   12.50
  -1   1   3  412.86   12.90
   1   1   3  411.86   13.00
  -1   1  -3  415.16   12.80
  -1  -1   3  385.36   12.70
  -1   1  -3  412.56   12.60
  -1   1  -3  414.36   12.60
   1   1   3  414.56   13.10
  -1  -1   3  390.16   12.50
   1  -1  -3  442.26   13.10
  -1  -1   3  379.06   12.60
  -1   1  -3  405.06   12.70
  -1  -1   3  388.76   12.40
   1  -1  -3  443.96   13.20
   1  -1  -3  440.26   13.20
   1   1   3  390.86   13.00
   1   1   3  414.86   11.70
  -1   3   3   81.19    4.60
  -1  -3  -3  111.99    5.10
  -1   3   3   76.29    6.00
   1  -3   3   87.89    4.30
   1  -3   3   94.09    3.90
   1   3  -3   96.99    5.60
  -1   3   3   81.19    4.90
   1  -3   3   98.59    5.80
  -1  -3  -3  115.19    5.10
   1   3  -3   99.09    5.70
  -1  -3  -3  109.59    6.10
   1  -3   3   89.79    5.30
  -1  -3  -3  114.19    5.30
   1   3  -3  100.69    4.30
  -1  -3  -3  105.09    5.40
   1   3  -3  106.99    4.80
  -1   3  -3  109.09    4.10
   1  -3  -3  100.79    5.20
   1  -3  -3  101.49    5.80
   1   3   3   92.39    5.90
  -1   3  -3  104.99    5.80
   1   3   3  101.09    6.00
  -1  -3   3   77.09    5.30
  -1  -3   3   82.89    5.10
   1  -3  -3   99.19    4.90
  -1   3  -3  113.09    4.70
   1  -3  -3  102.19    5.20
   1  -3  -3  105.39    5.20
   1   3   3   93.19    4.80
   1   5  -3 1685.03   54.19
  -1   5   3 1908.61   53.19
  -1  -5  -3 1827.92   55.09
   1   5  -3 1839.52   53.49
   1  -5   3 1960.70   55.59
   1  -5   3 1863.91   51.49
  -1   5   3 1923.41   51.69
  -1  -5  -3 1899.71   53.69
  -1   5   3 1851.31   55.19
   1  -5   3 1934.71   48.40
   1   5  -3 1861.21   54.69
   1  -5   3 1919.61   54.79
  -1  -5  -3 1862.01   53.89
  -1  -5  -3 1822.12   53.19
  -1  -5  -3 1837.72   51.39
  -1   5  -3 1857.71   51.49
   1  -5  -3 1860.21   51.49
  -1  -5   3 1843.22   55.09
  -1   5  -3 1821.42   54.79
  -1   5  -3 1933.91   55.09
  -1  -5   3 1769.52   51.69
   1   5   3 1879.81   55.49
   1  -5  -3 1819.42   52.99
   1  -5  -3 1864.51   53.79
   1   5   3 1842.72   53.39
   1   5   3 1867.41   51.59
   1  -5  -3 1834.82   54.99
  -1   5  -3 1892.21   48.30
   1  -5  -3 1819.52   53.89
  -1  -5   3 1889.51   54.59
  -1  -7  -3   88.89    6.90
   1   7  -3   69.79    5.20
  -1  -7  -3   76.89    6.00
   1   7  -3   74.79    6.90
  -1  -7  -3   74.39    4.50
   1  -7   3   75.19    5.00
  -1   7   3   68.39    6.90
   1  -7   3   79.19    7.30
  -1   7   3   66.89    5.60
  -1   7  -3   75.59    7.00
  -1  -7   3   65.29    4.90
   1  -7  -3   64.99    4.30
   1  -7  -3   64.49    6.10
   1   7   3   85.29    5.40
   1   7   3   81.19    6.20
  -1  -7   3   70.19    6.80
  -1   7  -3   82.19    5.30
   1  -7  -3   64.29    5.40
   1   7   3   81.79    7.40
   1  -9   3   88.69    8.70
  -1  -9  -3   73.29    4.50
   1   9  -3   81.09    8.60
   1   9  -3   73.69    6.10
   1  -9   3   75.69    5.90
  -1   9   3   90.99    8.90
  -1  -9  -3   72.39    5.10
  -1   9   3   95.49    7.30
   1   9   3   83.09    7.00
  -1  -9   3   80.39    8.60
   1  -9  -3   69.89    4.50
   1  -9  -3   84.09    9.50
  -1   9  -3   77.99    8.30
  -1  -9   3   77.99    6.10
   1   9   3   94.99    9.10
  -1   9  -3   72.39    5.70
   1  11  -3  317.37   14.50
  -1  11   3  272.97   18.60
   1  11  -3  296.57   18.90
  -1 -11  -3  304.97   18.00
   1 -11   3  307.87   19.00
  -1  11   3  328.17   17.80
  -1  11  -3  320.07   14.30
  -1 -11   3  326.87   19.40
   1 -11  -3  272.97    9.00
   1  11   3  319.97   15.90
   1 -11  -3  307.67   18.00
  -1  11  -3  305.97   19.10
   1  11   3  318.67   19.70
  -1  13   3   81.89    7.90
   1  13  -3   69.29   11.20
  -1 -13  -3   70.99   10.90
   1 -13   3   74.49   12.00
  -1  13   3   82.09   13.10
   1  13   3   69.29   11.50
  -1 -13   3   77.69   10.30
   1 -13  -3   69.69   12.30
  -1  13  -3   67.49    6.60
  -1  13  -3   60.89   11.40
   1  13   3   77.19    8.00
  -1   1   5 5416.86  151.68
   1   1  -5 5491.05  153.08
  -1  -1  -5 5392.56  151.08
   1  -1   5 5454.95  152.78
  -1   1   5 5381.76  155.48
  -1  -1  -5 5324.47  147.09
  -1  -1  -5 5332.27  156.28
   1  -1   5 5590.44  144.69
   1   1  -5 5739.53  157.58
   1  -1   5 5402.86  155.78
  -1   1  -5 5599.14  157.18
   1   1   5 5443.06  155.98
   1  -1  -5 5276.07  146.29
   1  -1  -5 5566.64  151.88
   1  -1  -5 5518.75  146.39
  -1   1  -5 5517.15  152.78
  -1  -1   5 5511.15  153.18
  -1  -1   5 5564.44  156.18
   1   1   5 5380.96  146.69
  -1  -1   5 5563.94  143.79
   1  -1  -5 5497.05  156.28
  -1   1  -5 5421.16  144.89
   1   1   5 5371.46  150.98
  -1  -1   5 5429.06  145.49
   1  -3   5 2002.50   56.89
   1   3  -5 2058.99   55.29
  -1  -3  -5 1953.50   56.89
   1   3  -5 1934.11   57.29
  -1   3   5 2077.19   55.69
  -1  -3  -5 2025.00   58.09
   1   3  -5 2055.09   56.99
  -1  -3  -5 2006.10   58.09
  -1   3   5 2080.99   57.29
   1  -3   5 1944.41   57.29
  -1   3   5 2076.39   56.99
   1  -3   5 1941.31   55.49
  -1  -3  -5 2057.69   55.39
  -1  -3  -5 1990.30   56.59
   1  -3   5 1981.10   55.19
   1  -3  -5 2121.09   55.89
  -1  -3   5 2044.80   55.29
  -1   3  -5 1899.91   57.09
  -1   3  -5 2031.00   55.69
   1   3   5 2050.69   56.99
  -1  -3   5 2003.20   57.59
   1  -3  -5 2091.59   57.19
   1   3   5 1996.80   55.29
  -1  -3   5 2020.10   55.99
  -1   3  -5 2013.20   57.09
   1  -3  -5 2127.99   58.19
   1  -3  -5 2053.19   56.79
   1   3   5 1999.20   57.29
  -1   3  -5 2011.20   55.29
   1  -3  -5 2034.50   57.89
  -1  -3   5 2023.40   56.69
   1   5  -5  920.91   30.20
   1  -5   5  915.41   30.00
  -1  -5  -5  904.01   28.40
  -1   5   5  902.21   29.30
  -1  -5  -5  863.41   30.60
  -1   5   5  913.81   30.80
  -1   5   5  950.00   28.70
   1  -5   5  913.41   30.90
   1   5  -5  898.51   25.50
  -1  -5  -5  848.12   28.90
   1  -5   5  911.21   25.70
  -1  -5  -5  904.61   28.60
  -1  -5  -5  870.81   28.00
  -1  -5  -5  867.01   30.70
   1   5  -5  882.91   27.50
   1  -5   5  867.61   27.10
   1  -5  -5  892.31   28.80
  -1  -5   5  910.51   25.60
  -1  -5   5  878.31   29.60
   1   5   5  885.51   28.30
   1   5   5  955.20   31.40
   1  -5  -5  863.21   28.90
  -1   5  -5  908.31   27.30
   1  -5  -5  904.91   28.20
  -1  -5   5  931.21   31.00
   1   5   5  875.11   29.30
   1  -5  -5  922.91   28.70
  -1   5  -5  914.41   30.40
  -1   5  -5  923.11   25.70
   1  -5  -5  894.81   30.70
  -1  -5   5  887.21   27.60
  -1   7   5  516.65   18.70
  -1  -7  -5  529.65   20.10
  -1  -7  -5  562.24   20.80
   1   7  -5  546.75   22.30
  -1   7   5  520.15   22.50
   1   7  -5  501.15   18.50
   1  -7   5  485.55   17.90
   1  -7   5  539.35   22.80
  -1   7   5  512.95   20.30
  -1   7  -5  530.55   22.10
  -1  -7   5  514.85   22.40
   1  -7  -5  512.65   18.50
   1   7   5  548.35   22.90
  -1  -7   5  476.05   18.20
  -1   7  -5  541.05   18.50
   1   7   5  520.95   20.60
   1  -7  -5  540.35   20.80
   1   7   5  512.35   18.60
  -1   9   5  747.43   24.80
   1   9  -5  783.82   26.00
  -1   9   5  756.52   31.50
  -1   9   5  704.23   27.40
   1  -9   5  770.12   31.40
   1  -9   5  702.83   24.80
  -1  -9  -5  701.43   24.30
  -1  -9  -5  765.02   29.00
   1   9  -5  750.62   30.70
   1   9   5  753.02   24.90
   1  -9  -5  769.72   32.10
   1   9   5  746.63   31.50
  -1   9  -5  780.92   25.60
   1   9   5  758.22   28.20
   1  -9  -5  693.13   24.30
  -1  -9   5  761.42   31.30
  -1   9  -5  744.13   30.60
   1  11  -5   18.60    3.90
  -1  11   5   25.10    5.10
  -1  11   5   19.30    5.60
  -1 -11  -5   20.30    5.60
  -1 -11  -5   10.90    4.00
  -1 -11  -5   17.10    3.00
   1 -11   5   11.50    4.90
   1  11  -5   12.50    5.00
   1  11   5   20.30    5.40
  -1 -11   5   15.20    5.20
   1 -11  -5   16.40    4.90
   1  11   5   13.40    3.80
  -1  11  -5   10.80    3.00
   1 -11  -5   17.30    3.20
  -1  11  -5   14.50    5.40
   1  13  -5   22.70    7.20
  -1 -13  -5   35.00    9.50
   1  13  -5   25.80    4.90
  -1  13   5   26.90    5.90
  -1  13   5   36.60    9.10
  -1 -13  -5   25.00    6.00
   1 -13   5   33.80    8.30
  -1 -13   5   24.60    7.00
   1  13   5   22.70    5.20
   1 -13  -5   27.50    6.50
   1  13   5   27.80    8.00
  -1  13  -5   33.90    5.30
  -1  13  -5   38.80    8.70
  -1  -1  -7  879.11   27.90
  -1  -1  -7  890.71   27.50
   1   1  -7  830.42   27.10
   1   1  -7  827.22   27.20
   1   1  -7  843.72   27.10
  -1  -1  -7  873.61   29.50
   1  -1   7  901.11   27.10
   1  -1   7  895.31   27.50
  -1   1   7  864.01   27.80
   1  -1   7  928.61   26.50
  -1   1   7  847.62   26.90
   1   1  -7  833.52   26.50
   1   1  -7  793.12   26.10
  -1  -1  -7  859.61   25.00
  -1   1   7  904.01   28.10
  -1   1   7  842.72   25.40
   1  -1  -7  822.22   27.60
   1   1   7  886.81   28.00
  -1   1  -7  845.82   26.20
   1   1   7  914.41   28.00
  -1  -1   7  848.32   27.30
  -1  -1   7  837.82   26.50
   1  -1  -7  828.22   26.80
  -1   1  -7  887.21   27.40
  -1   1  -7  897.21   27.00
   1   1   7  906.11   25.10
   1  -1  -7  831.02   27.60
  -1   1  -7  897.71   27.40
  -1   1  -7  884.11   27.40
   1  -1  -7  812.72   25.40
   1   1   7  882.01   27.30
   1   3  -7  428.06   16.80
  -1   3   7  458.55   17.30
  -1  -3  -7  410.86   16.80
   1   3  -7  478.85   16.50
  -1  -3  -7  412.86   16.60
  -1  -3  -7  432.36   14.70
   1   3  -7  471.05   16.60
  -1   3   7  443.46   15.00
  -1  -3  -7  385.96   17.00
   1   3  -7  462.75   15.90
   1  -3   7  450.05   16.10
  -1   3   7  438.66   17.10
   1  -3   7  441.26   16.40
  -1  -3  -7  439.96   17.40
   1  -3   7  456.35   17.00
   1  -3   7  453.45   15.90
   1   3   7  438.96   17.10
   1  -3  -7  435.76   15.10
  -1   3  -7  434.16   15.70
   1   3   7  434.86   14.60
  -1  -3   7  478.65   16.10
   1  -3  -7  426.26   18.70
  -1  -3   7  474.75   16.50
   1  -3  -7  455.25   17.50
  -1  -3   7  465.25   16.40
  -1   3  -7  440.36   16.00
  -1  -3   7  482.85   17.40
   1  -3  -7  456.75   17.10
   1  -3  -7  431.86   16.90
  -1   3  -7  446.16   16.70
   1   3   7  403.56   16.80
  -1  -5  -7  577.54   19.50
  -1   5   7  558.34   21.40
   1  -5   7  552.24   19.30
   1   5  -7  547.95   21.30
   1   5  -7  560.64   19.70
  -1   5   7  549.25   20.80
  -1  -5  -7  573.44   19.70
   1  -5   7  555.14   18.40
   1  -5   7  586.64   22.50
  -1  -5  -7  561.84   20.60
   1   5  -7  546.25   18.30
  -1  -5  -7  617.74   23.30
  -1   5  -7  578.34   19.50
   1   5   7  594.44   21.20
  -1   5  -7  574.94   21.80
  -1  -5   7  566.34   18.50
  -1  -5   7  587.44   22.50
   1  -5  -7  543.55   20.40
   1  -5  -7  557.54   19.80
  -1  -5   7  510.65   19.30
   1   5   7  567.04   21.70
   1  -5  -7  562.24   19.90
   1  -5  -7  572.44   22.60
  -1   5  -7  558.74   18.40
   1   7  -7  633.64   22.10
   1  -7   7  603.84   21.50
   1   7  -7  640.84   25.40
   1  -7   7  645.74   19.00
  -1  -7  -7  631.74   23.20
  -1  -7  -7  632.94   26.60
   1   7  -7  625.54   18.70
  -1   7   7  611.14   24.30
  -1   7   7  581.04   22.70
  -1   7  -7  656.93   25.70
  -1   7  -7  661.43   22.00
   1  -7  -7  639.24   26.50
   1  -7  -7  598.24   23.20
   1   7   7  625.94   23.10
  -1  -7   7  570.24   21.60
   1   7   7  632.74   24.60
  -1  -7   7  630.94   18.80
  -1   7  -7  630.04   18.80
   1  -9   7  152.08   12.20
  -1  -9  -7  133.89    9.90
  -1   9   7  151.38    9.20
  -1   9   7  131.29   10.10
   1   9  -7  136.19    8.50
  -1  -9  -7  141.19   12.20
   1   9  -7  138.49   11.30
  -1   9  -7  131.19   11.20
  -1   9  -7  145.49    8.50
   1   9   7  134.69    8.80
  -1  -9   7  153.18   12.20
   1  -9  -7  139.59   12.20
   1   9   7  118.39    9.80
   1  -9  -7  140.99   10.10
  -1  11   7  272.87   16.00
  -1 -11  -7  270.67   19.20
  -1 -11  -7  266.17   13.50
   1  11  -7  295.27   18.70
   1 -11   7  310.67   19.80
  -1 -11  -7  245.18   16.00
   1  11  -7  296.37   14.00
   1 -11  -7  278.87   13.80
  -1  11  -7  272.37   13.20
   1 -11  -7  288.27   17.00
  -1 -11   7  305.17   19.40
   1 -11  -7  276.37   19.40
   1  11   7  262.77   16.00
  -1  11  -7  302.77   19.00
   1 -13   7   82.59   10.80
  -1 -13  -7   76.79   13.60
  -1  13   7   87.49    9.30
   1  13  -7   66.69    8.70
   1  13  -7   67.79   11.00
  -1 -13  -7   69.39    9.00
   1 -13  -7   77.19    9.80
  -1 -13   7   74.79   12.40
  -1  13  -7   87.99   13.20
  -1  13  -7   77.29    6.90
   1 -13  -7   86.09   13.90
   1   1  -9   93.39    5.90
  -1   1   9  113.79    7.60
   1   1  -9  107.29    6.50
   1  -1   9   96.19    7.20
   1  -1   9  102.79    7.00
  -1   1   9   98.79    6.50
   1   1  -9   97.79    6.70
  -1  -1  -9   80.49    4.90
   1   1  -9   98.69    6.80
  -1  -1  -9   91.89    6.50
   1   1  -9  109.49    7.10
  -1   1   9  108.99    5.80
   1  -1   9   98.59    5.90
  -1  -1   9  106.69    6.50
  -1   1  -9   85.89    6.40
  -1   1  -9   96.89    6.70
   1   1   9   96.79    5.20
   1  -1  -9  101.29    5.50
   1   1   9   81.79    7.00
   1  -1  -9   98.39    6.50
  -1   1  -9   90.29    5.70
  -1   1  -9   93.09    6.30
  -1  -1   9  114.69    6.50
   1  -1  -9  102.29    7.20
   1   1   9   96.59    7.10
  -1   1  -9   86.49    6.30
  -1  -1   9  118.69    7.40
   1   1   9   98.99    7.00
   1   3  -9 1288.17   40.20
  -1  -3  -9 1272.37   41.40
  -1   3   9 1232.48   42.50
   1  -3   9 1326.47   40.10
   1   3  -9 1302.17   40.40
  -1  -3  -9 1305.37   37.60
   1  -3   9 1250.67   40.00
  -1   3   9 1360.26   42.00
   1  -3   9 1352.36   40.80
  -1   3   9 1337.67   41.80
   1   3  -9 1200.68   40.20
   1   3  -9 1297.57   39.90
  -1  -3  -9 1382.06   42.30
   1   3  -9 1269.17   40.20
  -1   3  -9 1268.67   39.80
   1   3   9 1362.26   42.00
   1  -3  -9 1274.07   38.00
  -1   3  -9 1318.77   40.70
  -1   3  -9 1310.47   40.20
  -1  -3   9 1322.67   40.00
  -1   3  -9 1343.07   40.30
   1  -3  -9 1319.97   41.50
   1   3   9 1352.76   37.50
  -1   3  -9 1227.28   40.20
  -1  -3   9 1284.67   39.90
  -1  -3   9 1328.77   40.90
   1  -3  -9 1322.57   41.50
   1   3   9 1380.86   42.10
   1   5  -9 1449.15   43.30
   1  -5   9 1443.76   42.10
  -1  -5  -9 1375.06   41.60
   1   5  -9 1405.06   44.70
   1  -5   9 1412.16   45.60
  -1  -5  -9 1394.66   41.50
  -1  -5  -9 1408.26   46.40
   1   5  -9 1353.86   41.70
  -1   5   9 1297.87   44.60
   1  -5   9 1317.77   42.40
  -1   5   9 1354.86   44.60
  -1   5  -9 1500.55   45.50
   1  -5  -9 1336.57   41.90
   1  -5  -9 1391.86   41.90
   1  -5  -9 1411.16   46.10
   1   5   9 1429.76   45.70
   1   5   9 1448.96   45.00
  -1  -5   9 1412.46   45.60
  -1  -5   9 1414.66   42.00
  -1   5  -9 1487.75   43.10
  -1   5  -9 1406.96   42.00
  -1  -7  -9    7.50    3.50
   1   7  -9   16.90    2.80
  -1   7   9   10.60    3.70
  -1   7   9   10.50    3.30
   1   7  -9   13.90    4.10
   1   7  -9   16.90    3.50
  -1  -7  -9   14.40    3.40
   1  -7   9   21.30    5.10
   1  -7   9   17.50    2.80
  -1   7  -9   18.80    3.60
  -1   7  -9   18.50    2.90
   1   7   9   13.70    4.00
   1  -7  -9   15.80    3.60
   1  -7  -9   10.80    3.90
  -1  -7   9   18.30    2.90
   1   7   9   14.70    3.70
  -1  -7   9   10.50    3.80
   1   9  -9  384.26   20.70
  -1   9   9  396.86   20.20
   1   9  -9  415.76   17.50
   1  -9   9  436.16   22.70
  -1  -9  -9  417.56   18.70
  -1   9   9  397.46   18.50
  -1  -9  -9  411.86   22.60
   1  -9  -9  402.96   22.40
  -1   9  -9  421.46   21.60
   1   9   9  407.06   20.40
   1   9   9  402.96   18.60
  -1  -9   9  411.96   22.10
   1  -9  -9  411.36   18.90
  -1   9  -9  400.96   17.00
  -1  11   9   80.09    8.90
  -1 -11  -9   95.29   11.20
   1  11  -9   85.89    7.40
  -1 -11  -9   98.49    9.30
   1  11  -9   94.89   10.40
   1  11   9   71.29    8.70
  -1  11  -9   88.39    7.10
   1  11   9   77.99    7.70
   1 -11  -9   83.39    8.10
   1 -11  -9   87.79   11.10
  -1  11  -9   86.39   10.30
   1 -11  -9   88.19    8.90
   1  13  -9  284.27   14.20
  -1 -13  -9  259.47   16.90
   1  13  -9  236.78   18.60
  -1 -13  -9  227.28   19.70
   1 -13   9  285.77   20.60
  -1 -13  -9  235.68   13.40
   1 -13  -9  257.97   17.50
  -1  13  -9  250.87   12.90
   1  13   9  255.37   17.10
  -1  13  -9  264.67   19.90
   1 -13  -9  251.97   20.40
  -1 -13   9  269.07   20.20
   1 -13  -9  220.88   13.00
   1   1 -11  252.47   11.40
   1  -1  11  240.68   12.80
   1  -1  11  215.28   11.50
  -1  -1 -11  222.18    9.80
  -1  -1 -11  248.58   12.40
   1   1 -11  260.07   13.10
   1   1 -11  250.27   11.80
   1  -1  11  250.97   11.20
  -1   1  11  245.88   13.20
  -1   1  11  254.17   10.50
  -1  -1 -11  263.17   13.50
  -1   1  11  232.08   11.80
  -1  -1  11  257.57   13.10
   1  -1 -11  250.77   12.20
   1  -1 -11  232.68   13.00
   1   1  11  248.98   13.30
   1  -1 -11  222.38   10.20
  -1  -1  11  227.48   11.40
  -1   1 -11  233.58   12.10
  -1   1 -11  243.18   12.00
  -1  -1  11  262.57   11.60
  -1   1 -11  259.57   13.00
   1   1  11  222.98   11.80
   1   1  11  245.48   10.10
   1   3 -11  648.84   24.10
  -1  -3 -11  649.34   25.10
   1  -3  11  675.73   23.90
  -1   3  11  624.44   20.80
  -1   3  11  614.54   24.90
   1   3 -11  623.84   23.30
  -1  -3 -11  576.44   20.10
   1  -3  11  658.53   24.00
  -1   3  11  653.53   25.30
   1  -3 -11  614.84   24.30
  -1  -3  11  670.23   24.00
  -1   3 -11  643.04   23.80
   1   3  11  658.93   25.40
   1   3  11  638.04   25.10
  -1   3 -11  615.94   23.50
  -1  -3  11  647.64   23.90
   1  -3 -11  577.64   20.70
  -1  -5 -11  586.24   24.80
   1   5 -11  550.54   21.90
  -1   5  11  556.94   24.00
   1  -5  11  564.24   21.40
   1   5 -11  555.64   22.80
  -1   5  11  579.74   27.00
  -1  -5 -11  563.64   19.80
   1  -5  11  569.64   23.60
  -1  -5 -11  571.84   19.70
  -1   5 -11  541.25   23.00
   1   5  11  578.74   24.40
  -1   5 -11  593.14   22.20
  -1  -5  11  594.24   24.10
   1  -5 -11  577.14   24.50
   1   5  11  567.44   26.80
   1  -5 -11  556.24   20.10
  -1  -5  11  551.74   21.40
  -1  -7 -11   42.10    7.90
  -1   7  11   30.30    5.60
   1   7 -11   34.00    5.50
  -1  -7 -11   29.60    5.30
   1  -7  11   34.90    3.90
   1  -7  11   31.80    6.50
   1   7 -11   34.40    6.30
  -1   7  11   21.50    5.10
   1   7 -11   28.60    4.50
  -1  -7 -11   37.90    4.40
  -1   7 -11   31.40    4.10
   1   7  11   30.90    5.90
   1   7  11   31.60    6.00
  -1  -7  11   32.50    6.80
   1  -7 -11   29.90    6.20
  -1   7 -11   35.30    5.40
  -1   7 -11   33.40    6.30
  -1  -7  11   34.90    3.90
   1  -7 -11   30.70    4.20
   1   9 -11  410.36   18.10
   1   9 -11  421.06   21.60
  -1  -9 -11  397.56   18.20
  -1   9  11  408.96   20.00
   1   9 -11  407.16   14.20
  -1   9  11  406.46   21.20
   1   9 -11  410.66   14.10
  -1  -9 -11  405.36   23.00
   1  -9  11  362.46   21.60
  -1  -9  11  423.86   23.00
   1   9  11  394.06   19.70
  -1   9 -11  386.36   14.00
   1  -9 -11  422.36   23.40
   1   9  11  372.16   20.60
  -1   9 -11  413.16   21.80
  -1   9 -11  409.96   17.80
   1  -9 -11  413.66   18.70
  -1   9 -11  366.06   13.90
  -1 -11 -11  176.68   16.00
  -1  11  11  191.68   12.90
  -1  11  11  192.48   14.60
   1 -11  11  212.68   17.20
  -1 -11 -11  186.98   13.00
   1  11 -11  187.38   11.70
   1  11 -11  173.08   16.50
   1  11  11  184.48   12.70
  -1  11 -11  206.08   11.80
  -1 -11  11  191.18   16.40
   1 -11 -11  184.58   16.00
   1 -11 -11  171.58   12.70
   1  11  11  197.68   14.90
   1   1 -13  195.48   10.50
   1   1 -13  209.28   11.30
   1  -1  13  211.18   10.50
   1  -1  13  224.28   13.10
  -1  -1 -13  188.68   11.40
  -1  -1 -13  179.48    9.00
  -1   1  13  194.98    9.50
  -1  -1 -13  188.58   12.50
  -1   1  13  188.48   12.50
  -1   1 -13  216.08   10.70
   1  -1 -13  205.88   12.90
   1   1  13  187.08   12.40
  -1  -1  13  204.38   12.60
  -1  -1  13  204.48   10.70
  -1   1 -13  228.38   12.00
   1  -1 -13  192.88   11.20
   1   1  13  195.88    9.30
  -1  -3 -13  887.91   33.00
  -1  -3 -13  848.62   27.40
   1   3 -13  846.12   34.80
   1  -3  13  890.01   32.30
   1  -3  13  918.91   31.60
   1   3 -13  878.81   31.40
  -1   3  13  914.31   34.10
  -1  -3 -13  922.71   34.40
  -1   3  13  877.41   28.00
  -1   3 -13  895.71   31.80
   1   3  13  904.51   34.10
  -1   3 -13  924.81   32.50
   1   3  13  890.01   33.80
   1   3  13  875.41   27.40
   1  -3 -13  950.50   34.70
  -1  -3  13  865.41   32.00
   1  -3 -13  869.91   28.10
  -1  -3  13  920.31   31.80
   1  -3 -13  895.81   32.70
   1   5 -13  147.39   10.60
  -1  -5 -13  145.39    7.90
  -1   5  13  150.98   11.70
   1  -5  13  137.99   10.70
  -1  -5 -13  149.09    7.90
  -1  -5 -13  176.78   12.50
   1  -5  13  146.59    9.90
  -1   5  13  161.88   12.10
   1   5  13  163.98   12.10
   1  -5 -13  161.68   11.80
   1  -5 -13  153.28    8.50
  -1   5 -13  154.38   10.30
  -1  -5  13  144.39   10.80
   1  -5 -13  147.59    8.30
   1   5  13  146.69   11.40
  -1  -5  13  148.99   10.00
   1   7 -13   67.39    7.90
   1  -7  13   77.29    8.90
  -1   7  13   86.19    9.30
   1  -7  13   70.89    6.40
  -1  -7 -13   76.79    9.20
  -1   7  13   77.79    8.40
   1   7 -13   68.39    7.20
  -1  -7 -13   58.09    6.00
  -1  -7 -13   69.19    5.90
  -1   7 -13   77.69    8.40
  -1  -7  13   86.29    9.30
  -1  -7  13   75.69    6.70
  -1   7 -13   84.49    8.70
   1  -7 -13   64.59    6.10
   1  -7 -13   88.69    9.90
   1   7  13   89.09    8.90
   1   7  13   81.59    9.00
   1   9 -13  619.74   28.90
  -1  -9 -13  642.84   24.70
  -1   9  13  620.54   28.00
   1  -9  13  668.13   31.10
  -1   9  13  595.14   29.00
  -1  -9 -13  686.63   31.80
   1  -9  13  646.74   22.30
   1   9 -13  634.54   25.50
   1   9 -13  617.54   21.80
   1   9  13  598.14   27.60
   1   9  13  584.14   29.00
  -1   9 -13  640.44   29.30
   1  -9 -13  622.54   24.60
   1  -9 -13  613.64   30.40
  -1   9 -13  658.33   25.40
  -1  -9  13  626.34   30.60
  -1  11  13   75.49    9.30
  -1 -11 -13   59.19   11.20
  -1 -11 -13   64.59    7.50
  -1  11  13   70.69   11.30
   1  11 -13   68.89    7.40
   1 -11  13   60.19   11.20
   1  11 -13   62.69   10.90
  -1  11 -13   64.49    7.30
  -1 -11  13   51.49   10.00
  -1  11 -13   70.89   11.10
   1 -11 -13   58.09   10.40
   1 -11 -13   59.39    7.60
   1  11  13   50.09    8.50
   1  11  13   60.29   10.20
  -1  -1 -15  296.17   13.00
  -1  -1 -15  333.07   16.50
  -1   1  15  309.77   17.70
   1  -1  15  305.27   17.20
  -1   1  15  315.87   13.40
  -1  -1 -15  322.37   17.80
   1   1 -15  311.17   17.30
   1   1 -15  308.07   15.50
   1  -1  15  304.27   14.10
   1   1  15  314.67   13.00
  -1   1 -15  324.17   16.10
   1  -1 -15  338.87   16.30
  -1  -1  15  317.67   14.60
   1  -1 -15  283.27   13.10
  -1   1 -15  326.67   17.50
   1  -1 -15  324.97   17.80
  -1  -1  15  297.07   17.00
   1   1  15  318.37   17.90
  -1  -3 -15  760.22   26.00
   1   3 -15  886.41   33.10
  -1  -3 -15  834.42   32.70
  -1   3  15  837.82   34.10
   1   3 -15  825.72   31.10
  -1   3  15  835.82   27.00
   1  -3  15  869.41   32.70
   1  -3  15  879.81   31.10
  -1  -3 -15  814.42   34.00
  -1  -3  15  888.81   31.50
   1   3  15  864.81   34.40
  -1   3 -15  850.81   32.50
   1  -3 -15  808.22   34.10
   1   3  15  835.22   26.30
  -1  -3  15  862.51   32.80
  -1   3 -15  835.82   35.20
   1   5 -15  415.36   19.80
  -1  -5 -15  368.96   14.40
  -1  -5 -15  391.96   21.70
   1  -5  15  412.76   20.00
   1  -5  15  361.86   18.30
  -1  -5 -15  399.66   21.20
   1   5 -15  414.56   19.70
  -1   5  15  394.36   21.20
  -1  -5 -15  366.96   14.50
  -1   5 -15  389.46   19.10
   1  -5 -15  376.56   15.20
   1  -5 -15  363.06   14.90
  -1   5 -15  391.76   19.50
   1  -5 -15  412.16   22.20
   1  -5 -15  400.16   21.00
   1   5  15  381.36   21.00
  -1  -5  15  394.26   19.80
  -1  -5  15  397.36   18.90
   1   5  15  351.76   20.40
   1   7 -15   52.79    8.30
  -1   7  15   59.59    8.20
   1  -7  15   51.69    6.30
  -1  -7 -15   52.49    5.20
  -1   7  15   62.29   10.00
   1   7 -15   62.29    7.30
   1  -7  15   59.29    9.40
  -1  -7 -15   57.59    9.70
  -1   7 -15   59.49    6.90
   1   7  15   57.59    9.40
   1  -7 -15   53.49    5.40
  -1  -7  15   65.59    6.90
  -1   7 -15   65.69    9.60
   1   7  15   55.89    8.90
   1  -7 -15   61.49   10.10
  -1  -7  15   57.29    9.50
   1  -9  15   64.79    6.20
   1   9 -15   54.79    6.10
  -1  -9 -15   60.59    6.10
   1   9 -15   67.59    7.90
  -1   9  15   75.19    9.40
  -1   9  15   71.99   11.40
   1  -9  15   67.29   10.80
  -1  -9 -15   60.29   12.50
   1   9 -15   70.89   10.60
  -1  -9  15   73.29   11.90
   1  -9 -15   60.59    6.50
  -1   9 -15   57.39    9.10
  -1   9 -15   73.39    8.10
   1   9  15   75.09    9.40
   1   9  15   67.29   11.30
   1   1 -17  177.08   13.40
  -1   1  17  149.19   13.00
  -1   1  17  148.59    8.90
   1   1 -17  149.19   10.80
   1  -1  17  162.68    9.90
  -1  -1 -17  165.98   13.00
  -1  -1 -17  141.99    8.50
   1  -1  17  174.08   13.30
  -1  -1 -17  164.38   11.80
   1  -1 -17  160.18   11.30
  -1   1 -17  153.68   12.50
   1   1  17  169.48    8.90
   1  -1 -17  146.99   12.50
  -1   1 -17  160.38   11.30
  -1  -1  17  164.18   10.10
  -1  -1  17  162.58   13.00
   1   1  17  161.88   13.20
  -1  -3 -17   55.99    4.60
  -1  -3 -17   66.69    8.80
   1  -3  17   62.59    8.10
   1  -3  17   55.39    6.40
  -1   3  17   43.80    8.10
   1   3 -17   48.40    7.30
   1   3 -17   48.30    8.00
  -1   3  17   43.70    4.40
  -1  -3 -17   59.29    7.60
  -1  -3  17   38.40    7.20
   1   3  17   47.70    8.20
   1   3  17   53.69    4.40
   1  -3 -17   54.79    9.20
   1  -3 -17   55.59    8.40
  -1  -3  17   51.29    6.20
   1  -3 -17   39.20    4.60
  -1   3 -17   52.49    6.60
  -1   3 -17   52.79    8.50
   1  -5  17    2.50    2.90
   1   5 -17    5.60    3.60
   1  -5  17    5.70    3.10
  -1  -5 -17   -0.20    2.80
  -1  -5 -17    3.40    1.60
   1   5 -17    5.50    3.30
  -1   5  17    6.70    4.10
  -1   5 -17    6.40    3.90
   1  -5 -17    6.50    6.10
   1   5  17    4.20    4.10
  -1  -5  17    3.40    3.30
  -1   5 -17    9.00    3.50
   1  -5 -17    2.80    1.80
   1  -5 -17    4.10    2.50
  -1  -5  17    0.20    2.50
   1   7 -17    6.60    3.50
  -1  -7 -17    9.00    4.80
   1  -7  17   10.80    4.60
   1   7 -17   12.10    4.20
  -1  -7 -17    6.40    2.40
  -1  -7 -17    1.60    3.30
  -1   7  17   10.20    4.30
   1  -7 -17    7.20    5.10
   1  -7 -17    7.50    4.20
  -1  -7  17    7.30    3.20
   1  -7 -17    8.10    2.50
  -1   7 -17    8.60    3.60
   1   7  17   11.70    5.10
  -1  -7  17    8.60    4.70
  -1   7 -17    1.20    2.30
   1  -9  17  246.88   18.30
   1  -9  17  228.38   13.30
   1   9 -17  246.88   17.30
   1   9 -17  248.48   15.60
  -1   9  17  240.48   17.60
  -1  -9 -17  245.98   18.70
   1   9 -17  214.18   13.20
  -1  -9 -17  239.18   19.00
  -1  -9  17  242.78   18.60
   1   9  17  254.47   18.70
   1   9  17  237.58   17.60
   1  -9 -17  250.77   19.10
  -1   9 -17  241.38   15.10
   1  -9 -17  233.08   19.00
  -1   9 -17  221.98   16.40
  -1   1  19   50.39    5.20
  -1  -1 -19   62.59    9.00
   1   1 -19   61.49    9.70
   1   1 -19   49.60    7.20
  -1  -1 -19   49.40   11.40
   1  -1  19   58.69    6.10
  -1   1  19   36.00    8.20
  -1   1 -19   52.69    7.80
  -1   1 -19   37.90    7.90
   1   1  19   66.19   11.20
   1  -1 -19   54.39    9.40
   1  -1 -19   50.09    7.70
  -1  -1  19   49.50    6.00
   1   1  19   48.20    4.90
   1   3 -19  283.57   18.20
   1   3 -19  267.57   15.80
   1  -3  19  253.87   14.80
  -1   3  19  302.37   19.90
  -1  -3 -19  268.47   18.90
  -1  -3 -19  281.77   17.60
  -1   3  19  257.17   11.30
   1  -3  19  273.37   17.80
  -1  -3  19  264.87   17.60
   1  -3 -19  261.57   18.70
  -1  -3  19  287.37   15.80
   1   3  19  262.87   18.70
  -1   3 -19  284.97   18.20
  -1   3 -19  249.58   15.80
   1  -3 -19  290.27   17.20
   1   5 -19  104.29   11.10
   1  -5  19  130.49   11.50
  -1  -5 -19  104.79   12.30
   1  -5  19  126.09   11.30
  -1  -5 -19  119.99   12.30
   1   5 -19  104.99   10.10
  -1   5  19  137.49   13.50
   1  -5 -19  106.69   11.00
  -1  -5  19  126.09   11.40
  -1   5 -19  124.69   11.30
  -1  -5  19  114.79   10.80
  -1   5 -19  112.29   11.40
   1  -5 -19   97.89   12.20
   1   5  19  122.09   12.90
  -1   7  19   41.70    8.70
   1  -7  19   37.30    6.50
   1   7 -19   34.50    7.10
  -1  -7 -19   42.50    9.10
  -1  -7 -19   40.30    9.20
   1  -7  19   50.39    8.70
   1   7 -19   36.10    7.90
   1  -7 -19   35.90    7.40
  -1  -7  19   43.80    8.20
   1   7  19   43.20    9.20
   1  -7 -19   28.60    7.80
  -1  -7  19   33.40    6.80
  -1   1  21    0.20    3.70
  -1  -1 -21    6.50    4.60
   1   1 -21   -0.30    3.10
  -1  -1 -21    5.60    3.90
   1  -1  21    3.80    3.20
  -1   1  21    6.30    4.80
   1  -1  21    6.10    4.10
   1   1 -21    4.80    4.00
  -1   1 -21   -1.10    3.10
   1  -1 -21    1.40    4.00
   1  -1 -21   -3.10    2.90
   1   1  21    0.50    3.70
  -1  -1  21    8.10    4.40
  -1  -1  21    3.60    3.10
  -1   1 -21    7.90    3.90
   1   3 -21   23.40    5.50
  -1  -3 -21   23.20    7.00
  -1   3  21   26.50    7.10
  -1  -3 -21   25.00    6.10
   1   3 -21   23.10    6.90
   1  -3  21   15.00    5.60
   1  -3  21   27.70    5.70
  -1   3 -21   30.00    7.90
  -1  -3  21   28.60    7.40
   1  -3 -21   33.00    6.90
  -1   3 -21   14.70    5.20
   1  -3 -21   29.00    7.10
   1   3  21   12.70    5.70
  -1  -3  21   23.40    5.30
   2   2   0  501.45   13.30
   2  -2   0  497.75   14.00
   2  -2   0  494.95   13.50
  -2  -2   0  507.45   14.70
   2   2   0  496.75   15.30
  -2  -2   0  486.35   13.30
  -2  -2   0  488.75   15.20
   2  -2   0  510.05   13.50
   2  -2   0  500.55   15.30
  -2   2   0  490.85   15.30
   2   2   0  483.05   15.00
  -2  -2   0  486.25   15.10
   2   2   0  493.55   14.70
  -2   2   0  487.75   15.20
  -2   2   0  490.05   14.00
   2  -2   0  481.55   15.20
   2   4   0  400.36   11.10
   2  -4   0  409.06   15.00
   2  -4   0  390.66   13.10
  -2  -4   0  401.86   13.70
  -2  -4   0  389.66   11.20
   2   4   0  386.16   15.00
  -2  -4   0  393.56   14.90
  -2   4   0  408.06   15.20
   2  -4   0  414.96   11.50
  -2   4   0  405.26   13.20
   2  -4   0  395.86   15.00
  -2   4   0  405.66   14.90
   2  -4   0  404.26   11.50
   2   4   0  400.96   14.70
  -2  -4   0  425.06   15.00
   2   4   0  410.86   13.80
   2  -6   0   22.80    1.40
   2   6   0   26.70    4.50
  -2   6   0   20.20    4.10
   2  -6   0   25.30    1.40
  -2   6   0   21.00    3.10
  -2  -6   0   28.60    4.70
   2   6   0   23.80    2.90
  -2  -6   0   22.10    2.90
   2   6   0   25.50    4.40
  -2   6   0   25.40    4.60
   2  -6   0   20.50    3.80
   2  -6   0   17.60    2.70
   2   8   0 1593.24   51.29
  -2  -8   0 1609.24   50.39
  -2   8   0 1514.05   50.79
   2  -8   0 1528.15   45.90
  -2  -8   0 1485.75   46.50
  -2   8   0 1513.75   45.70
   2   8   0 1587.14   47.00
   2  -8   0 1545.05   50.09
   2 -10   0  327.67   18.10
   2  10   0  297.17   18.10
  -2  10   0  319.37   14.20
  -2 -10   0  292.77   17.30
  -2  10   0  316.27   18.50
   2  10   0  310.77   14.70
   2  12   0  152.68   10.70
   2  12   0  148.49   13.90
  -2  12   0  157.08   10.00
  -2 -12   0  150.98   13.20
   2 -12   0  160.88   13.40
  -2  12   0  131.09   12.90
  -2  14   0   99.39   12.60
   2  14   0  107.19    9.20
   2 -14   0   94.69   11.60
  -2  14   0   96.99    8.40
   2  14   0  102.39   13.10
  -2 -14   0   95.79   11.90
  -2   0  -2  848.02   23.20
  -2   0   2  864.41   24.00
  -2   0   2  895.71   24.30
   2   0   2  880.91   23.30
   2   0  -2  863.81   23.50
   2   0   2  866.81   24.20
   2   0  -2  888.61   24.30
   2   0   2  910.71   24.10
   2   0  -2  893.61   24.30
  -2   0   2  873.51   23.50
   2   0  -2  873.51   24.00
  -2   0  -2  857.11   24.30
  -2   0  -2  878.71   24.20
  -2   0   2  891.61   24.30
   2   2  -2  347.87   11.40
   2   2  -2  346.07   12.20
  -2  -2  -2  377.46   12.70
   2  -2   2  367.96   10.70
   2  -2   2  377.26   12.40
   2  -2   2  351.56   11.20
   2   2  -2  360.26   12.00
   2   2  -2  351.16   10.50
  -2  -2  -2  366.46   11.40
  -2  -2  -2  377.16   11.50
  -2   2   2  352.86   11.60
  -2  -2  -2  392.86   11.50
  -2  -2  -2  365.16   12.00
  -2   2   2  376.06   12.30
  -2   2   2  362.66   11.50
  -2   2   2  362.46   11.80
   2  -2   2  364.36   12.20
   2  -2  -2  369.86   11.50
  -2   2  -2  367.16   10.70
  -2  -2   2  361.16   12.30
  -2   2  -2  363.76   12.20
   2  -2  -2  365.56   11.60
   2  -2  -2  352.56   11.70
   2   2   2  380.66   12.70
  -2  -2   2  341.27   11.30
  -2  -2   2  360.96   10.50
  -2   2  -2  365.36   10.80
   2   2   2  393.16   12.20
  -2   2  -2  372.56   12.30
   2   2   2  385.26   11.40
  -2  -2   2  358.96   11.90
   2   2   2  385.36   11.60
   2  -2  -2  361.26   12.20
  -2  -4  -2 2169.18   58.59
   2   4  -2 2092.59   59.39
   2   4  -2 2023.80   59.19
   2  -4   2 2135.69   59.49
   2  -4   2 2072.79   59.69
  -2  -4  -2 2173.48   58.39
  -2   4   2 2038.70   59.49
   2  -4   2 2046.70   56.49
  -2   4   2 2051.49   57.69
  -2   4   2 2033.50   56.59
  -2  -4  -2 2179.68   59.99
   2  -4   2 2124.99   54.59
   2   4  -2 2095.79   57.49
  -2  -4  -2 2199.88   56.59
   2   4   2 2120.19   59.99
   2  -4  -2 2114.39   58.79
   2  -4  -2 1988.60   57.59
   2   4   2 2044.80   58.39
  -2   4  -2 2098.89   59.49
  -2   4  -2 2224.28   54.69
  -2  -4   2 1926.61   57.09
   2   4   2 2153.98   56.59
   2  -4  -2 2175.08   59.29
  -2   4  -2 2152.68   59.79
  -2  -4   2 1991.60   59.49
  -2  -4   2 2021.80   59.09
   2   4   2 2068.59   58.39
  -2   4  -2 2237.28   56.79
   2  -4  -2 2098.39   56.59
   2  -4  -2 2051.89   59.49
  -2   6   2 4978.70  136.79
   2   6  -2 5029.80  133.09
   2   6  -2 5090.79  136.69
  -2   6   2 4989.30  130.89
  -2  -6  -2 4900.81  130.69
   2  -6   2 4902.31  136.49
  -2  -6  -2 5133.29  135.49
   2  -6   2 4847.31  131.89
  -2   6   2 4968.80  133.39
  -2  -6  -2 4816.82  133.89
  -2   6  -2 5015.10  136.69
  -2  -6   2 4973.00  132.89
   2  -6  -2 4928.11  135.89
   2   6   2 4889.31  133.99
   2  -6  -2 5142.29  135.79
   2  -6  -2 4864.11  133.29
   2   6   2 5054.39  130.79
   2   6   2 4997.70  136.99
  -2  -6   2 5165.68  136.89
   2  -6  -2 4991.00  130.89
   2   6   2 4760.62  134.89
  -2  -8  -2  253.97    9.20
  -2   8   2  266.57   15.00
   2  -8   2  258.77   12.50
  -2   8   2  260.17   12.20
  -2  -8  -2  268.07   14.20
   2  -8   2  265.87   14.90
   2   8  -2  292.17   12.50
  -2  -8  -2  246.08    9.20
   2   8  -2  276.47   15.20
   2  -8  -2  275.47    9.70
   2  -8  -2  270.27   14.30
  -2   8  -2  269.37   11.50
   2   8   2  260.37   15.20
   2  -8  -2  260.87    9.40
   2  -8  -2  259.27   12.30
  -2   8  -2  267.97   15.00
  -2  -8   2  252.17   14.40
  -2  -8   2  258.67   11.80
   2   8   2  261.27   12.70
  -2 -10  -2  162.68   12.20
  -2  10   2  173.68   13.30
   2  10  -2  159.78   12.70
  -2  10   2  175.08   10.20
   2  10  -2  168.88   10.00
   2 -10   2  153.68   12.40
  -2  10  -2  155.78   12.60
  -2  10  -2  165.28    9.20
   2 -10  -2  179.98   12.60
  -2 -10   2  171.48   12.90
   2  10   2  165.88   13.10
   2 -10  -2  168.38    5.90
   2 -10  -2  166.98    5.40
   2  10   2  154.38   10.10
   2  12  -2  111.19   11.80
  -2  12   2   88.79   10.70
  -2  12   2  100.09    9.60
   2  12  -2  108.19    8.30
   2 -12   2   91.79   10.60
  -2 -12  -2  112.99   10.90
  -2  12  -2  101.09   11.50
   2  12   2   89.49   10.90
  -2 -12   2  101.79   11.00
  -2  12  -2   91.69    7.40
   2 -12  -2  114.59   11.20
   2  12   2   95.99    8.30
  -2  14   2   93.39   11.70
   2  14  -2   83.39    8.20
  -2 -14  -2   90.09   11.20
  -2  14   2   95.99    8.70
   2  14  -2   94.89   12.00
   2 -14   2  104.49   12.40
   2  14   2  109.89   12.90
   2  14   2  100.39    9.40
  -2 -14   2  127.39   13.20
  -2  14  -2   76.89   12.40
   2 -14  -2   99.09   11.70
   2   0   4    1.80    0.90
   2   0  -4    1.40    0.90
  -2   0   4    0.30    0.50
  -2   0  -4    4.20    1.20
   2   0  -4    1.40    0.80
  -2   0   4    0.90    0.60
   2   0  -4    2.60    0.80
   2   0   4    1.10    0.50
   2   0   4    1.60    0.80
   2   0  -4    4.60    1.40
   2   0   4    3.40    1.10
  -2   0   4    0.90    0.80
  -2   0  -4    2.00    0.90
  -2   0  -4    1.60    0.90
   2   0  -4    3.50    1.00
  -2  -2  -4 1733.03   47.80
   2   2  -4 1718.13   46.80
  -2   2   4 1783.92   48.30
   2  -2   4 1730.43   47.90
   2  -2   4 1756.22   48.10
  -2  -2  -4 1785.72   48.80
  -2  -2  -4 1742.33   48.10
  -2  -2  -4 1710.13   46.20
   2   2  -4 1633.74   48.00
   2   2  -4 1689.93   47.40
   2   2  -4 1710.43   47.40
   2  -2   4 1732.43   47.00
  -2  -2  -4 1762.52   48.90
  -2   2   4 1711.23   46.90
  -2   2   4 1720.23   48.00
   2  -2   4 1732.23   46.90
  -2  -2   4 1707.93   47.30
  -2   2  -4 1681.13   46.90
  -2   2  -4 1701.53   46.80
   2   2   4 1756.02   48.70
   2   2   4 1722.63   47.90
  -2  -2   4 1773.02   48.30
  -2   2  -4 1670.83   47.90
   2  -2  -4 1693.23   48.20
   2  -2  -4 1691.63   48.20
  -2  -2   4 1766.22   46.90
   2  -2  -4 1710.03   47.90
   2   2   4 1774.12   46.20
  -2  -2   4 1696.53   47.40
   2  -2  -4 1641.04   47.70
   2  -2  -4 1702.63   47.00
  -2   2  -4 1636.54   47.80
   2   4  -4  328.77   13.90
   2  -4   4  363.06   14.40
   2   4  -4  336.07   10.60
   2   4  -4  352.16   13.80
  -2  -4  -4  335.17   12.60
   2  -4   4  351.86   13.80
   2  -4   4  331.97   11.70
  -2   4   4  329.27   12.90
  -2  -4  -4  350.46   13.30
  -2  -4  -4  347.97   13.70
   2  -4   4  362.06   10.90
  -2   4   4  347.07   12.70
  -2  -4  -4  336.07   12.40
  -2   4   4  337.17   14.00
  -2  -4  -4  326.57   14.10
   2  -4  -4  323.67   13.80
  -2  -4   4  337.37   13.30
   2  -4  -4  327.87   12.80
   2   4   4  334.97   13.30
  -2   4  -4  362.16   11.00
   2   4   4  341.27   12.50
  -2  -4   4  316.47   12.00
  -2   4  -4  351.66   11.80
  -2  -4   4  353.36   14.30
   2  -4  -4  333.07   12.40
  -2   4  -4  360.76   14.10
  -2  -4   4  342.47   10.70
   2   4   4  338.17   14.30
   2  -4  -4  319.37   12.70
   2  -4  -4  327.57   12.80
  -2  -6  -4  521.25   19.00
  -2  -6  -4  501.35   18.90
   2   6  -4  477.25   19.90
   2  -6   4  538.45   13.70
   2  -6   4  559.64   21.30
   2  -6   4  512.95   16.70
  -2   6   4  458.75   16.90
  -2   6   4  490.65   20.40
  -2   6   4  463.65   18.20
  -2  -6  -4  498.05   17.00
  -2  -6  -4  518.05   19.30
   2   6  -4  461.55   17.20
   2  -6  -4  458.55   18.10
   2   6   4  516.15   19.10
  -2   6  -4  536.15   17.00
  -2  -6   4  485.05   20.40
  -2   6  -4  524.85   20.50
  -2  -6   4  447.76   17.00
   2  -6  -4  458.05   16.80
   2  -6  -4  454.25   18.90
   2   6   4  542.25   21.20
   2   6   4  556.74   17.60
   2  -6  -4  461.45   18.70
  -2   6  -4  520.55   13.60
  -2   8   4  489.25   17.20
  -2  -8  -4  496.85   17.10
   2  -8   4  489.65   22.20
   2  -8   4  446.16   18.40
   2   8  -4  496.95   18.50
  -2  -8  -4  513.15   20.90
  -2   8   4  492.95   19.50
   2   8  -4  511.05   22.30
   2   8   4  505.05   20.20
  -2  -8   4  464.85   18.00
   2   8   4  504.65   23.00
  -2  -8   4  532.95   23.00
   2  -8  -4  474.45   16.90
   2  -8  -4  460.95   20.40
   2   8   4  501.25   17.20
  -2   8  -4  499.65   17.80
   2 -10   4   84.49    9.30
  -2 -10  -4   77.29    4.90
  -2 -10  -4   71.79    5.00
   2  10  -4   90.49    6.90
  -2  10   4   75.59    7.00
  -2  10   4   88.59    9.40
   2 -10   4   63.19    5.50
   2  10  -4   68.39    8.40
  -2 -10  -4   79.49    8.20
  -2  10  -4   81.19    6.10
  -2 -10   4   81.79    9.20
  -2  10  -4   87.39    9.40
   2  10   4   89.39    9.60
   2 -10  -4   76.09    5.00
   2 -10  -4   78.89    8.30
   2 -10  -4   77.89    5.20
   2  12  -4  729.63   27.20
   2 -12   4  717.93   34.00
   2  12  -4  767.22   34.80
  -2  12   4  747.83   29.00
  -2 -12  -4  813.62   33.30
  -2  12   4  755.22   35.10
   2 -12  -4  696.93   20.60
  -2  12  -4  761.62   26.30
  -2  12  -4  719.63   34.10
  -2 -12   4  753.12   34.40
   2  12   4  742.63   35.00
   2  12   4  774.52   29.90
   2 -12  -4  758.02   33.00
  -2  14   4  173.78   16.80
  -2 -14  -4  180.38   15.70
  -2  14   4  181.58   12.70
   2 -14   4  169.88   16.10
   2  14  -4  189.98   17.00
  -2 -14  -4  184.18   17.10
   2  14  -4  183.18   11.40
  -2  14  -4  180.08   10.60
   2  14   4  171.08   12.70
  -2 -14   4  186.08   16.60
   2 -14  -4  202.38   16.10
   2  14   4  188.98   17.10
  -2  14  -4  161.08   15.60
   2   0   6 3087.09   87.39
  -2   0   6 3205.88   86.49
   2   0   6 3134.49   85.39
  -2   0   6 3185.28   87.79
   2   0   6 3227.58   87.79
   2   0  -6 3194.58   86.29
  -2   0  -6 3210.38   87.49
   2   0  -6 3289.17   87.79
   2   0  -6 3429.76   88.19
   2   0  -6 3379.86   86.69
   2   0   6 3113.99   87.09
  -2   0  -6 3216.78   87.69
   2   0  -6 3374.76   87.89
  -2   0  -6 3268.77   87.49
  -2   0   6 3157.08   86.29
  -2   0  -6 3078.39   85.39
   2   2  -6  616.24   20.60
  -2   2   6  589.84   20.40
   2  -2   6  632.94   20.50
  -2  -2  -6  644.04   21.10
  -2  -2  -6  657.83   21.50
  -2  -2  -6  639.94   18.50
  -2   2   6  598.94   20.90
   2   2  -6  636.44   20.10
  -2   2   6  616.94   19.20
   2   2  -6  622.44   20.40
   2   2  -6  660.93   21.60
   2  -2   6  619.64   20.10
  -2   2   6  590.14   20.90
  -2  -2  -6  646.44   21.00
   2  -2   6  642.34   20.40
  -2   2  -6  648.74   20.30
  -2  -2   6  602.14   19.80
  -2   2  -6  627.24   20.20
  -2  -2   6  616.34   20.70
  -2   2  -6  590.04   20.20
   2   2   6  632.64   21.10
  -2  -2   6  621.64   20.40
   2   2   6  630.54   21.20
  -2   2  -6  656.23   20.30
  -2  -2   6  608.34   20.10
   2  -2  -6  616.94   20.90
   2   2   6  624.94   21.10
  -2   2  -6  643.74   20.70
   2   2   6  621.24   18.30
   2  -2  -6  638.84   20.80
   2  -2  -6  621.74   20.90
   2  -2  -6  629.54   19.40
   2  -2  -6  591.54   20.70
   2  -4   6  515.15   18.30
  -2  -4  -6  478.15   16.30
   2   4  -6  435.36   18.00
  -2   4   6  469.45   17.90
  -2   4   6  492.55   17.90
  -2  -4  -6  470.15   19.00
   2   4  -6  491.95   18.00
  -2   4   6  479.95   16.80
   2   4  -6  489.65   15.90
  -2  -4  -6  471.65   17.90
  -2  -4  -6  493.75   19.20
  -2  -4  -6  474.35   17.60
  -2  -4  -6  491.45   16.40
   2  -4   6  489.75   16.10
   2  -4   6  484.25   16.40
   2   4  -6  507.95   17.10
   2  -4   6  498.35   18.70
   2  -4  -6  484.25   18.80
   2  -4  -6  475.55   18.70
   2  -4  -6  470.45   17.40
   2  -4  -6  484.15   17.90
  -2   4  -6  473.05   18.20
   2   4   6  493.05   18.40
   2  -4  -6  502.55   17.10
   2   4   6  485.85   17.80
  -2   4  -6  472.65   15.90
  -2   4  -6  479.25   16.40
  -2   4  -6  465.65   18.20
  -2  -4   6  450.65   16.70
  -2  -4   6  495.45   16.00
  -2  -4   6  487.25   18.70
  -2  -6  -6 2346.07   67.49
  -2   6   6 2402.06   69.19
   2   6  -6 2407.56   63.89
   2  -6   6 2269.97   65.99
  -2  -6  -6 2298.87   67.89
  -2   6   6 2445.36   71.39
   2  -6   6 2382.16   64.19
   2   6  -6 2403.06   70.19
   2   6  -6 2335.47   66.99
  -2   6   6 2473.75   68.19
  -2  -6  -6 2383.26   71.69
  -2  -6  -6 2385.86   67.79
   2  -6   6 2433.56   71.39
  -2   6  -6 2346.27   70.59
  -2  -6   6 2467.65   71.49
   2   6   6 2375.96   69.49
   2  -6  -6 2358.76   68.59
   2  -6  -6 2417.86   71.29
  -2   6  -6 2341.87   66.19
  -2  -6   6 2470.45   63.99
   2  -6  -6 2399.66   68.39
  -2   6  -6 2377.96   64.09
  -2  -6   6 2205.98   66.59
   2  -6  -6 2353.96   67.49
   2   6   6 2423.36   67.99
   2  -8   6  590.44   25.20
   2   8  -6  548.35   26.60
  -2  -8  -6  538.65   21.90
   2  -8   6  517.55   19.10
  -2   8   6  577.24   20.80
  -2   8   6  551.84   22.30
  -2  -8  -6  594.34   25.80
   2   8  -6  575.54   20.70
  -2   8   6  569.64   24.80
  -2  -8  -6  520.95   19.90
  -2   8  -6  536.05   23.90
  -2   8  -6  562.94   19.70
   2  -8  -6  587.74   22.80
   2   8   6  547.55   22.60
   2   8   6  521.55   24.60
   2  -8  -6  549.95   20.30
  -2  -8   6  571.44   24.90
  -2  -8   6  502.65   21.30
   2   8   6  519.55   20.10
   2 -10   6  685.13   29.90
  -2  10   6  617.04   29.00
  -2  10   6  621.14   25.60
   2  10  -6  642.64   28.80
  -2 -10  -6  611.04   29.60
  -2 -10  -6  649.54   26.80
   2  10  -6  663.53   23.80
   2 -10  -6  624.94   26.80
   2  10   6  603.54   29.20
   2  10   6  633.04   22.50
  -2 -10   6  641.14   29.40
  -2  10  -6  633.54   22.50
  -2  10  -6  617.34   28.50
   2  10   6  626.84   26.10
   2 -10  -6  611.24   22.90
  -2 -12  -6   57.29    5.10
  -2  12   6  101.09   20.40
   2 -12   6   80.49   10.30
  -2 -12  -6   72.39   12.10
   2  12  -6   74.09   11.30
   2  12  -6   68.49    6.50
  -2  12   6   88.39    8.50
  -2 -12  -6   65.69    8.60
  -2  12  -6   60.69    5.90
  -2  12  -6   56.19   12.80
   2 -12  -6   62.99    5.30
   2  12   6   57.09    7.30
   2 -12  -6   65.79   12.90
  -2 -12   6   74.79    9.90
   2 -12  -6   74.59    9.00
  -2 -14  -6  128.49   14.80
   2 -14   6  149.39   14.80
   2  14  -6  126.19   13.90
  -2  14   6  131.19   11.40
  -2 -14  -6  138.99   13.30
   2  14  -6  123.39    9.70
  -2 -14   6  147.39   14.90
  -2  14  -6  118.29   13.90
   2  14   6  138.59   12.30
   2 -14  -6  151.98   16.30
   2 -14  -6  151.48   13.70
   2   0  -8    2.20    1.20
   2   0  -8    0.40    1.30
  -2   0  -8    1.00    1.30
  -2   0   8    2.30    2.00
   2   0  -8    3.70    1.80
   2   0   8   -0.50    1.20
   2   0   8    2.40    1.30
   2   0  -8    1.00    1.00
   2   0   8    1.70    0.90
   2   0  -8    1.20    1.10
  -2   0  -8    1.50    0.90
  -2   0  -8    2.60    1.60
  -2   0   8    0.90    1.10
  -2   0  -8    2.40    1.50
  -2   0  -8    3.10    1.70
   2   2  -8  137.39    7.60
  -2  -2  -8  115.59    5.40
  -2   2   8  120.39    6.10
   2  -2   8  127.49    7.30
  -2  -2  -8  105.99    7.10
  -2   2   8  121.29    7.20
  -2   2   8  124.09    7.80
   2  -2   8  116.59    6.80
   2   2  -8  130.69    7.30
   2  -2   8  112.99    6.90
  -2  -2  -8  108.99    7.30
   2   2  -8  124.29    6.80
  -2   2   8  127.19    7.80
  -2  -2  -8  111.59    7.40
   2   2  -8  127.29    7.10
   2   2  -8  139.69    7.60
  -2  -2   8  127.19    7.20
  -2   2  -8  120.59    7.10
   2   2   8  103.19    8.00
   2  -2  -8  110.29    5.90
  -2  -2   8  125.39    6.80
   2  -2  -8  127.49    7.70
   2   2   8  113.39    5.20
   2   2   8  107.29    7.30
   2  -2  -8  133.59    7.60
  -2   2  -8  114.59    7.00
   2   2   8  107.09    7.20
   2  -2  -8  122.99    7.60
  -2   2  -8  119.39    7.10
  -2   2  -8  119.09    7.10
  -2  -2   8  130.99    7.40
  -2   2  -8  109.59    6.60
  -2  -4  -8  696.93   21.90
  -2   4   8  659.03   24.60
   2  -4   8  697.83   22.80
   2  -4   8  677.63   24.10
   2   4  -8  708.63   23.60
   2  -4   8  677.23   23.00
   2   4  -8  681.73   22.60
   2   4  -8  700.03   24.20
  -2   4   8  666.63   22.30
   2  -4   8  705.23   24.90
  -2  -4  -8  646.94   25.00
  -2  -4  -8  685.13   25.60
  -2   4   8  679.83   24.60
   2   4   8  681.83   25.00
   2  -4  -8  690.83   22.70
   2   4   8  694.53   24.70
  -2   4  -8  718.03   24.80
   2  -4  -8  687.53   25.30
  -2  -4   8  641.84   23.10
  -2  -4   8  674.03   23.60
  -2  -4   8  728.43   25.30
  -2   4  -8  709.83   23.10
  -2  -4   8  683.43   22.70
  -2   4  -8  694.23   22.80
   2  -4  -8  638.14   24.70
  -2  -6  -8  178.08    9.20
  -2  -6  -8  173.08   11.60
   2  -6   8  168.78   11.20
  -2   6   8  178.48   10.90
   2   6  -8  187.08   11.20
   2   6  -8  176.68    8.00
   2  -6   8  152.28    8.60
   2  -6   8  165.98    8.00
   2   6  -8  176.88    9.50
  -2  -6  -8  172.58    9.20
  -2   6   8  177.58   10.40
   2   6   8  181.28   11.10
  -2   6  -8  174.48    8.10
  -2  -6   8  170.48   11.20
  -2  -6   8  183.08    8.20
  -2   6  -8  164.98    8.80
   2  -6  -8  173.18    9.60
  -2  -6   8  155.08    9.00
  -2   6  -8  171.98   11.00
   2  -6  -8  174.78    9.50
   2  -6  -8  169.08   11.50
   2   6   8  187.28   10.60
   2   8  -8 1527.05   47.30
   2  -8   8 1431.16   46.10
   2   8  -8 1565.54   51.79
  -2  -8  -8 1601.94   53.99
   2   8  -8 1507.65   42.00
   2   8  -8 1509.95   41.90
  -2   8   8 1517.55   50.29
  -2   8   8 1547.85   48.70
   2  -8   8 1546.45   42.60
  -2  -8  -8 1586.14   48.60
   2  -8   8 1580.54   53.09
  -2  -8   8 1530.25   52.89
   2   8   8 1621.94   48.90
   2  -8  -8 1594.14   53.69
  -2   8  -8 1505.45   42.40
   2   8   8 1577.64   51.09
  -2   8  -8 1595.74   46.70
   2  -8  -8 1570.74   49.20
  -2   8  -8 1521.95   51.69
   2  10  -8  133.29   11.70
  -2  10   8  125.39    9.00
   2 -10   8  140.59   12.50
  -2  10   8  141.59   11.20
   2  10  -8  148.99    9.40
  -2 -10  -8  153.58   13.30
  -2 -10  -8  145.59   10.80
   2 -10  -8  151.38   13.50
  -2  10  -8  125.79   11.70
   2  10   8  137.09   11.10
   2 -10  -8  140.89   10.80
  -2  10  -8  149.69    8.80
   2  10   8  152.58    9.80
  -2 -10   8  162.98   13.50
  -2 -12  -8   49.70    6.00
   2 -12   8   48.50    9.30
  -2  12   8   48.80    8.40
   2  12  -8   56.59   10.50
   2  12  -8   46.40    9.40
  -2 -12  -8   62.79    8.10
  -2 -12  -8   55.29   11.10
  -2 -12   8   45.20    9.20
   2 -12  -8   62.39    8.20
   2 -12  -8   41.50    5.70
  -2  12  -8   57.99    5.60
  -2  12  -8   54.59    9.70
   2 -12  -8   69.09   12.50
   2  12   8   45.30    7.40
   2   0 -10  862.81   27.80
  -2   0 -10  883.31   29.60
   2   0  10  848.72   26.10
  -2   0  10  845.22   29.30
  -2   0 -10  797.22   25.90
   2   0 -10  875.81   29.60
   2   0 -10  829.42   26.80
  -2   0  10  886.01   27.10
  -2   0 -10  831.72   28.40
   2   0  10  847.82   29.60
   2   0  10  811.32   28.10
  -2  -2 -10    5.00    2.10
   2   2 -10    2.20    1.60
  -2   2  10   12.80    3.00
   2  -2  10    5.10    2.10
   2   2 -10    2.00    1.80
   2   2 -10    3.70    1.90
   2  -2  10    1.40    1.30
   2  -2  10    3.20    2.00
  -2   2  10    1.90    2.20
  -2   2  10    7.40    1.90
  -2   2  10    4.90    2.30
  -2  -2 -10    2.80    1.20
   2   2  10    3.40    2.30
   2   2  10    8.70    2.60
   2  -2 -10    7.80    2.70
   2  -2 -10    4.60    2.10
  -2   2 -10    5.60    2.10
   2   2  10    8.40    2.70
  -2  -2  10    3.20    1.70
   2  -2 -10    8.80    2.10
  -2  -2  10    2.50    1.80
  -2   2 -10    2.50    1.50
   2   2  10    6.90    1.70
  -2   2 -10    6.90    2.60
  -2  -2  10    4.00    2.30
  -2   4  10  187.88   11.10
   2  -4  10  155.68    9.10
  -2   4  10  191.48   11.20
  -2  -4 -10  138.49   10.10
   2  -4  10  143.19    9.50
  -2   4  10  183.18    8.70
   2   4 -10  194.88   10.40
   2   4 -10  201.58   10.40
   2   4 -10  176.18   10.60
  -2  -4 -10  143.79    7.40
   2  -4 -10  177.38    8.70
   2  -4 -10  191.18   11.20
  -2  -4  10  178.48    9.50
   2   4  10  130.49    9.70
  -2  -4  10  167.38   10.40
   2   4  10  148.79   10.10
  -2   4 -10  162.88   10.00
  -2   4 -10  147.19    9.00
   2  -6  10  694.43   24.10
  -2  -6 -10  683.73   23.90
  -2   6  10  723.53   27.60
   2   6 -10  709.73   24.10
   2   6 -10  744.03   27.80
  -2  -6 -10  674.13   24.50
  -2   6  10  690.63   27.80
   2   6 -10  746.63   25.90
  -2  -6  10  741.93   24.40
   2   6  10  681.63   27.00
  -2   6 -10  696.13   25.00
  -2   6 -10  718.13   27.80
   2   6  10  700.13   28.10
   2  -6 -10  772.72   29.50
   2  -6 -10  690.73   25.00
  -2   6 -10  681.33   24.00
   2  -6 -10  705.63   24.90
  -2  -6  10  719.73   28.70
   2   8 -10  149.88    9.70
  -2  -8 -10  149.29   12.50
   2  -8  10  161.68    7.80
   2   8 -10  145.69   11.40
  -2   8  10  147.49   10.70
  -2  -8 -10  150.78    9.50
   2  -8  10  160.48   12.70
   2   8 -10  151.78    7.50
  -2   8  10  145.39   11.30
   2   8 -10  147.49    7.40
   2  -8 -10  160.08   10.10
   2  -8 -10  164.68   12.90
   2   8  10  142.89   11.40
  -2   8 -10  155.98   12.00
   2   8  10  170.78   11.30
  -2   8 -10  177.68    9.80
  -2  -8  10  159.58   12.60
  -2   8 -10  149.09    7.60
  -2  10  10    7.80    3.60
   2  10 -10   11.20    3.50
  -2  10  10    3.30    3.00
  -2 -10 -10   14.80    3.90
   2 -10  10    8.80    4.40
   2  10 -10    6.70    4.00
  -2 -10 -10   10.40    4.50
  -2  10 -10    5.50    3.40
   2 -10 -10    9.80    5.10
   2  10  10    6.20    3.20
   2  10  10    7.70    4.10
  -2  10 -10   12.30    3.20
   2 -10 -10   16.80    4.90
  -2 -10  10   12.40    4.70
  -2 -12 -10   17.40    4.70
   2 -12  10    9.60    5.30
   2  12 -10   19.30    4.80
  -2 -12 -10   13.90    5.80
  -2 -12 -10   14.50    4.70
  -2  12  10   10.80    4.30
   2  12 -10   21.80    6.60
   2 -12 -10   21.50    5.20
  -2  12 -10   14.20    4.00
  -2 -12  10   12.50    4.90
   2 -12 -10   17.90    5.20
   2 -12 -10   24.00    7.40
  -2  12 -10   15.50    5.70
   2   0 -12    0.30    1.40
  -2   0 -12    0.20    1.20
   2   0  12    0.30    1.60
  -2   0  12   -0.50    1.60
   2   0 -12    0.70    1.10
  -2   0 -12    0.10    1.10
   2   0 -12    0.60    1.20
  -2   0 -12    0.50    1.30
   2   0  12    0.00    1.10
  -2   0  12    1.70    1.40
  -2   0  12    1.20    1.50
   2  -2  12   34.30    5.70
  -2   2  12   29.50    3.50
  -2  -2 -12   35.60    3.20
  -2  -2 -12   42.00    6.30
   2   2 -12   30.10    4.80
   2  -2  12   38.60    4.40
   2   2 -12   33.10    5.50
  -2  -2  12   30.00    4.80
  -2  -2  12   27.50    5.00
   2  -2 -12   29.70    3.50
  -2   2 -12   33.80    4.30
  -2   2 -12   38.70    5.90
  -2   2 -12   33.10    5.00
   2  -2 -12   32.30    5.30
  -2   4  12  267.67   11.90
  -2   4  12  273.97   15.40
  -2   4  12  270.87   15.40
   2   4 -12  296.27   14.50
  -2  -4 -12  289.87   15.80
   2  -4  12  296.97   14.30
   2  -4  12  300.97   14.90
  -2  -4 -12  270.77   11.20
   2   4 -12  295.87   14.80
   2  -4 -12  272.97   12.20
   2   4  12  286.07   11.30
  -2   4 -12  322.47   14.90
  -2  -4  12  297.47   15.20
   2   4  12  291.77   15.70
   2   4  12  298.07   16.00
   2  -4 -12  299.17   15.60
  -2   4 -12  311.77   15.20
  -2  -4  12  279.07   14.20
  -2   6  12   41.20    7.00
   2   6 -12   37.20    5.80
  -2   6  12   37.30    6.50
   2  -6  12   36.60    6.80
   2   6 -12   42.40    7.80
  -2  -6 -12   34.20    3.80
  -2  -6 -12   33.10    6.50
   2  -6  12   36.70    4.70
  -2  -6  12   38.80    6.70
   2  -6 -12   29.40    4.10
   2   6  12   37.40    6.70
  -2   6 -12   38.40    5.80
   2   6  12   43.20    7.10
  -2   6 -12   31.70    6.00
   2  -6 -12   35.50    4.50
   2  -6 -12   44.60    7.50
  -2  -6  12   34.00    4.50
  -2   8  12  338.17   18.10
  -2   8  12  341.57   19.00
   2   8 -12  326.27   18.20
  -2  -8 -12  301.87   19.00
   2  -8  12  305.37   13.60
  -2  -8 -12  339.57   15.00
   2   8 -12  329.07   18.10
   2  -8  12  314.07   19.00
  -2   8 -12  321.97   15.30
   2   8  12  321.17   18.70
   2  -8 -12  324.87   15.50
   2  -8 -12  339.87   19.70
  -2   8 -12  308.77   18.20
   2   8  12  301.57   17.20
  -2  -8  12  315.17   19.20
  -2  -8  12  299.07   13.40
  -2  10  12   11.00    4.20
  -2  10  12   16.20    4.60
  -2 -10 -12   13.50    4.00
  -2 -10 -12    9.20    5.80
   2  10 -12   13.20    3.70
   2  10 -12   19.50    5.40
  -2  10 -12    9.30    3.60
  -2  10 -12    9.00    3.80
  -2  10 -12   10.10    1.70
  -2 -10  12   10.60    6.40
   2 -10 -12   11.80    4.30
   2  10  12   13.60    4.50
   2 -10 -12   20.00    5.90
   2  10  12   14.50    5.50
   2  12 -12  134.59   10.20
  -2 -12 -12  131.29   14.40
   2  12 -12  144.89   14.10
  -2  12  12  133.29   13.00
  -2 -12 -12  139.99   11.00
   2 -12  12  130.19   14.00
   2  12  12  117.29   10.70
   2 -12 -12  139.79   14.50
  -2  12 -12  126.59   13.60
   2  12  12  137.79   13.30
   2 -12 -12  120.39   11.30
  -2  12 -12  137.69   14.90
  -2 -12  12  137.09   14.20
   2 -12 -12  122.19   11.30
  -2   0 -14  122.69    7.30
   2   0 -14  103.79    8.20
   2   0 -14  105.39    7.30
  -2   0 -14  133.79    9.50
  -2   0  14  112.89    7.60
   2   0 -14  125.59    9.80
  -2   0  14  119.59    9.90
   2   0  14  127.29    7.40
   2   0  14  139.39   10.60
   2  -2  14   51.59    6.50
  -2  -2 -14   44.80    7.20
   2   2 -14   56.49    5.80
  -2  -2 -14   42.70    3.90
  -2   2  14   68.79    7.50
  -2   2  14   55.19    4.60
   2   2 -14   55.79    6.60
   2  -2  14   44.20    5.10
  -2  -2 -14   47.00    5.90
  -2   2 -14   44.00    5.60
   2  -2 -14   52.59    4.70
   2   2  14   50.19    4.00
   2  -2 -14   63.09    6.40
   2  -2 -14   59.39    7.40
  -2   2 -14   51.29    6.30
  -2  -2  14   57.59    6.80
  -2  -2  14   57.49    5.90
   2   2  14   53.19    6.80
   2  -4  14  558.04   22.80
   2  -4  14  503.65   22.20
  -2   4  14  526.95   19.00
  -2  -4 -14  511.85   24.00
  -2   4  14  546.05   24.90
  -2  -4 -14  465.45   17.30
   2   4 -14  534.15   22.30
   2   4 -14  556.14   23.40
   2  -4 -14  550.84   25.20
   2   4  14  505.55   17.50
   2  -4 -14  515.25   19.00
   2  -4 -14  528.55   27.20
   2   4  14  534.55   24.60
  -2  -4  14  567.64   23.10
   2   4  14  519.85   24.50
  -2   4 -14  513.45   22.50
   2  -6  14   62.29    7.80
   2   6 -14   68.29    7.30
  -2   6  14   66.59    8.40
  -2  -6 -14   47.50    8.30
  -2  -6 -14   55.29    5.20
  -2  -6 -14   54.59    4.70
   2  -6  14   64.29    7.50
   2   6 -14   81.49    8.00
  -2   6  14   62.09    7.90
  -2   6 -14   60.19    7.40
   2  -6 -14   67.59    5.90
  -2  -6  14   69.59    8.20
  -2   6 -14   57.09    6.60
   2  -6 -14   65.99    8.30
   2   6  14   58.99    7.90
   2  -6 -14   53.89    5.70
   2   6  14   68.29    8.40
   2   8 -14    9.20    3.50
   2  -8  14    6.30    2.70
   2   8 -14    5.70    3.30
  -2  -8 -14   12.20    5.10
   2  -8  14    6.00    3.80
  -2   8  14    2.60    2.90
  -2  -8 -14   13.80    3.20
  -2   8  14   13.50    5.10
   2  -8 -14   12.90    4.40
  -2  -8  14    8.90    4.10
   2  -8 -14    9.30    3.00
   2   8  14    2.00    2.90
  -2   8 -14    9.70    3.70
   2   8  14    3.10    3.40
  -2   8 -14   11.10    3.60
  -2  -8  14    5.50    2.40
   2  10 -14  145.59   10.90
  -2 -10 -14  149.39   14.40
  -2  10  14  135.19   13.50
   2  10 -14  153.78   11.10
   2  10 -14  140.19   13.00
   2 -10  14  118.49   13.00
  -2  10  14  124.19   11.60
   2 -10 -14  136.79   10.40
  -2  10 -14  134.69   13.00
  -2  10 -14  123.69    7.50
  -2  10 -14  148.29   10.50
   2  10  14  111.79   11.40
  -2 -10  14  141.99   14.00
   2 -10 -14  151.78   14.50
   2  10  14  147.09   13.60
  -2   0  16    0.90    2.50
  -2   0 -16   -0.90    2.30
   2   0 -16    4.60    2.40
  -2   0 -16    5.80    2.50
  -2   0  16    1.20    1.60
   2   0  16    1.30    1.60
   2   0 -16    3.70    2.70
  -2   0 -16    3.00    2.00
   2   0  16    1.20    2.10
  -2   2  16   72.59    8.80
   2   2 -16   74.49    8.30
   2  -2  16   74.09    8.30
   2  -2  16   60.59    6.20
  -2  -2 -16   66.79    7.50
  -2  -2 -16   59.69    4.90
   2   2 -16   80.79    7.40
  -2   2  16   72.89    5.70
  -2  -2 -16   68.39    8.30
   2   2  16   63.79    8.30
  -2  -2  16   75.49    7.00
  -2   2 -16   56.79    7.30
  -2   2 -16   69.09    7.40
   2  -2 -16   58.19    5.60
  -2  -2  16   69.19    8.20
   2  -2 -16   64.39    8.40
   2   2  16   77.69    5.20
   2  -4  16  413.16   20.20
   2   4 -16  417.36   19.50
  -2  -4 -16  402.56   22.30
   2   4 -16  438.76   21.10
  -2   4  16  363.76   15.10
  -2  -4 -16  425.66   21.70
   2  -4  16  427.76   19.70
  -2   4  16  403.36   21.90
  -2  -4 -16  394.86   14.10
  -2  -4 -16  350.86   13.50
   2  -4 -16  346.57   15.00
   2   4  16  397.66   21.70
  -2  -4  16  418.86   20.00
   2  -4 -16  361.86   21.40
  -2  -4  16  401.26   19.90
  -2   4 -16  414.96   20.30
   2  -4 -16  394.46   20.50
  -2   4 -16  388.26   19.50
   2   6 -16   47.40    7.30
  -2  -6 -16   37.30    7.80
   2  -6  16   37.00    6.30
   2  -6  16   27.40    6.00
  -2  -6 -16   37.20    7.60
  -2  -6 -16   31.80    3.50
   2   6 -16   42.70    7.30
  -2   6  16   32.50    7.20
  -2  -6  16   38.60    6.60
   2  -6 -16   40.60    4.50
   2  -6 -16   55.69    9.00
  -2   6 -16   32.40    6.20
   2  -6 -16   38.40    8.10
  -2   6 -16   40.30    7.00
   2   6  16   38.00    7.50
  -2  -6  16   43.90    8.10
   2   6  16   33.90    7.40
   2   8 -16  429.86   22.40
   2  -8  16  429.76   24.00
  -2  -8 -16  384.06   23.50
  -2  -8 -16  388.96   15.50
  -2   8  16  438.76   24.50
   2  -8  16  403.56   18.80
   2   8 -16  438.76   21.10
   2  -8 -16  398.76   23.70
  -2  -8  16  416.96   19.00
   2   8  16  383.76   23.60
  -2  -8  16  397.86   25.90
   2  -8 -16  409.76   24.60
  -2   8 -16  420.96   23.10
   2   8  16  401.76   25.40
  -2   8 -16  427.56   20.30
   2  -8 -16  404.46   17.30
   2  10 -16   39.80    8.30
  -2 -10 -16   21.70    6.70
   2  10 -16   37.50    7.10
  -2  10  16   29.30    7.00
   2 -10  16   31.40    8.10
  -2 -10  16   39.10    9.10
  -2  10 -16   37.00    6.70
   2 -10 -16   41.20    9.50
   2 -10 -16   34.00    8.70
   2  10  16   35.20    8.80
  -2  10 -16   42.60    8.50
   2  10  16   23.80    6.80
   2   0 -18  197.78   14.70
  -2   0  18  193.68   14.90
   2   0 -18  198.08   12.90
  -2   0 -18  190.58   13.10
  -2   0  18  210.98   11.50
   2   0  18  199.98   10.30
  -2   0 -18  199.88   15.10
   2   0  18  206.48   15.20
  -2  -2 -18  122.49   11.80
  -2   2  18  106.29   11.20
   2  -2  18  117.89   11.30
   2   2 -18  127.89    9.80
   2   2 -18  135.39   11.80
  -2  -2 -18  126.89   11.00
  -2   2  18  108.19    7.30
   2  -2  18  117.29    8.80
  -2   2 -18  124.89   10.50
   2  -2 -18  117.49   11.80
  -2  -2  18  109.69   10.90
   2   2  18  111.79    6.30
  -2   2 -18  130.09   11.50
   2   2  18  110.09   11.60
   2  -2 -18  120.09   10.10
  -2  -2  18  124.89    9.60
  -2   4  18    3.00    1.90
   2   4 -18    1.10    2.40
  -2  -4 -18    1.70    1.30
   2  -4  18    5.80    4.00
   2   4 -18    4.20    3.00
   2  -4  18    1.70    2.90
  -2  -4 -18    3.10    3.50
  -2   4  18   -1.70    3.20
  -2  -4 -18    4.70    3.50
  -2   4 -18    0.90    2.80
   2   4  18    3.00    3.10
  -2  -4  18   -4.70    2.50
   2  -4 -18    2.20    3.10
  -2  -4  18    3.80    3.20
   2  -4 -18   -3.70    2.50
  -2   4 -18    5.70    3.30
  -2  -6 -18  168.78   15.70
   2   6 -18  187.78   13.80
  -2   6  18  193.08   15.90
   2   6 -18  200.98   14.40
   2  -6  18  174.58   13.70
   2  -6  18  178.68   12.90
  -2  -6 -18  176.28   15.20
   2  -6 -18  203.68   15.40
   2  -6 -18  170.38    8.90
  -2  -6  18  178.58   13.00
   2   6  18  168.08   14.80
  -2   6 -18  163.08   13.20
   2  -6 -18  164.48   15.40
  -2  -6  18  195.78   14.60
  -2   6 -18  196.18   13.70
  -2   8  18   49.10    8.80
  -2  -8 -18   72.29   12.30
   2   8 -18   64.49    9.40
   2  -8  18   42.90    8.50
   2  -8  18   54.49    7.00
  -2  -8 -18   63.89   11.20
   2   8 -18   45.60    8.30
   2  -8 -18   52.39    9.70
  -2  -8  18   67.59    7.50
  -2  -8  18   65.69   11.10
  -2   8 -18   60.99    9.00
   2  -8 -18   46.70   10.00
  -2   8 -18   40.40    7.90
   2   8  18   65.79   10.90
  -2   0 -20   -0.90    2.80
   2   0  20    2.40    3.30
   2   0 -20   -1.40    2.50
  -2   0  20   -0.50    2.30
   2   0  20   -1.60    2.20
  -2   0  20    1.20    3.70
   2   0 -20   -3.00    3.00
  -2   0 -20    4.30    3.30
   2   2 -20   28.40    6.00
   2  -2  20   15.80    5.80
   2  -2  20   22.60    4.80
  -2   2  20   30.50    7.20
   2   2 -20   35.00    8.20
  -2   2  20   32.90    4.40
  -2  -2 -20   26.60    6.80
  -2  -2 -20   26.20    6.30
  -2   2 -20   28.40    6.40
  -2  -2  20   24.00    6.20
   2  -2 -20   27.70    6.10
   2   2  20   28.30    7.70
  -2   2 -20   18.60    6.00
  -2  -2  20   25.40    5.30
   2  -2 -20   31.90    7.60
   2   4 -20   68.69    8.30
  -2  -4 -20   72.79    9.40
  -2  -4 -20   73.29   12.00
   2   4 -20   78.79    9.70
   2  -4  20   70.79    9.30
  -2   4  20   54.39   10.00
   2  -4  20   60.79    8.00
  -2   4 -20   79.99    9.60
  -2  -4  20   67.79    9.30
  -2  -4  20   62.99    8.50
   2  -4 -20   54.39   10.00
   2   4  20   61.39   10.50
   2  -4 -20   58.99    9.40
  -2   4 -20   76.79    8.90
  -2  -6 -20   36.80    8.10
   2   6 -20   34.70    7.70
  -2   6  20   49.10    9.50
   2  -6  20   38.30    8.20
  -2  -6 -20   41.00    9.70
   2  -6  20   36.60    7.10
  -2  -6  20   41.30    7.40
   2  -6 -20   48.00    8.80
   2   6  20   53.19    9.70
  -2   6 -20   45.50    8.70
   2  -6 -20   39.70    9.10
  -2  -6  20   63.29   11.50
  -3   1   1 1156.48   29.30
   3  -1   1 1097.49   29.50
   3   1  -1 1070.29   28.70
   3  -1   1 1100.09   29.60
   3   1  -1 1086.89   29.60
  -3   1   1 1133.89   29.50
  -3  -1  -1 1034.10   28.70
  -3  -1  -1 1030.90   29.00
  -3  -1  -1 1072.69   29.90
  -3  -1  -1 1054.19   29.80
   3  -1   1 1065.89   28.40
   3   1  -1 1093.09   28.70
   3   1  -1 1094.49   29.30
  -3  -1  -1 1003.20   29.40
   3  -1   1 1066.69   28.80
   3   1  -1 1103.59   29.10
   3   1   1 1126.79   29.60
   3   1   1 1124.19   29.90
   3  -1  -1 1062.09   29.20
   3   1   1 1129.89   29.20
  -3   1  -1 1037.90   28.20
  -3   1  -1 1027.90   29.50
  -3   1  -1 1006.20   28.80
   3   1   1 1095.39   28.80
  -3  -1   1 1178.38   29.20
   3  -3   1 1011.80   29.80
  -3   3   1 1006.70   27.50
   3  -3   1  968.30   26.60
  -3  -3  -1  982.20   29.80
  -3  -3  -1 1013.80   29.20
  -3   3   1  989.60   29.60
   3   3  -1 1066.09   29.80
  -3   3   1 1015.60   28.10
  -3  -3  -1  931.11   27.70
   3  -3   1  965.50   29.60
   3   3  -1  969.30   29.40
   3  -3   1  952.70   27.30
  -3  -3  -1  980.90   28.80
   3   3  -1 1044.30   28.70
   3   3   1  956.80   29.70
  -3  -3   1 1008.30   29.40
   3   3   1  917.01   28.80
  -3  -3   1 1050.19   29.90
   3  -3  -1 1046.30   29.80
  -3   3  -1  987.30   26.50
   3  -3  -1 1052.89   27.60
  -3   3  -1 1005.50   27.40
  -3   3  -1  970.00   29.50
   3   3   1  994.90   27.30
  -3   3  -1 1013.80   29.90
   3   3   1  987.80   28.90
  -3  -3   1  963.30   28.40
   3  -3  -1 1046.00   29.80
   3  -3  -1 1011.60   28.10
   3  -3  -1 1004.30   29.40
   3  -5   1 1173.68   36.20
   3  -5   1 1180.08   33.00
  -3   5   1 1131.39   36.30
   3   5  -1 1142.79   35.90
  -3  -5  -1 1091.69   34.30
  -3  -5  -1 1142.99   31.60
  -3   5   1 1119.59   35.60
  -3  -5  -1 1085.19   36.00
  -3   5   1 1140.29   33.60
   3  -5   1 1186.48   36.30
   3   5  -1 1191.28   36.40
   3  -5   1 1162.68   30.40
   3  -5   1 1197.18   30.40
   3   5  -1 1188.08   34.20
  -3  -5  -1 1133.79   35.40
   3  -5  -1 1145.79   31.90
  -3  -5   1 1199.68   34.20
  -3   5  -1 1130.69   36.10
   3  -5  -1 1094.59   35.90
  -3  -5   1 1210.28   36.30
   3   5   1 1145.09   36.40
  -3   5  -1 1197.78   36.70
  -3  -5   1 1182.58   36.30
   3  -5  -1 1147.39   37.70
   3   5   1 1165.98   34.70
   3   5   1 1167.68   31.60
   3  -5  -1 1127.89   33.60
   3   5   1 1099.79   35.20
   3  -5  -1 1161.28   31.90
  -3   5  -1 1165.18   33.00
   3  -5  -1 1150.68   35.80
  -3  -7  -1  693.03   19.10
   3   7  -1  661.43   25.90
  -3  -7  -1  667.83   19.10
  -3  -7  -1  722.93   25.70
   3  -7   1  667.83   21.90
  -3   7   1  705.73   26.50
  -3  -7  -1  657.73   23.30
   3  -7   1  670.93   25.70
   3   7  -1  667.73   23.10
  -3   7   1  666.23   22.40
   3   7   1  676.63   23.50
   3  -7  -1  670.63   22.60
   3  -7  -1  666.63   19.40
   3  -7  -1  687.63   19.60
   3   7   1  707.43   26.40
  -3  -7   1  636.84   22.70
  -3  -7   1  644.64   25.40
  -3   7  -1  676.23   22.00
  -3   7  -1  676.73   26.10
   3  -7  -1  661.43   25.20
   3  -9   1   77.59    5.90
  -3  -9  -1   86.79    8.20
   3   9  -1   77.29    8.40
   3  -9   1   74.29    7.80
  -3   9   1   86.99    8.90
   3   9  -1   90.79    6.90
  -3   9   1   83.09    6.40
  -3   9  -1   88.89    6.20
  -3  -9   1   82.89    8.30
   3  -9  -1   87.19    8.20
  -3   9  -1   92.59    8.80
   3   9   1   76.59    8.10
   3   9   1   64.49    6.20
   3  -9  -1   80.49    7.20
  -3  11   1  524.85   26.50
   3  11  -1  494.95   25.80
  -3 -11  -1  527.65   25.10
   3  11  -1  512.35   21.10
   3 -11   1  537.25   25.90
  -3  11   1  509.75   20.40
   3  11   1  513.05   26.30
   3 -11  -1  521.15   25.30
  -3  11  -1  511.65   19.80
  -3 -11   1  489.85   25.00
  -3  11  -1  515.65   26.10
   3  11   1  534.15   21.80
   3  13  -1  175.58   11.30
  -3  13   1  167.68   10.60
   3  13  -1  151.18   15.00
   3 -13   1  169.08   14.80
  -3  13   1  181.08   16.00
   3 -13  -1  157.38   14.20
   3  13   1  170.58   11.60
  -3  13  -1  164.48   10.20
   3  13   1  178.38   16.00
  -3  13  -1  187.38   16.20
  -3 -13   1  179.28   15.00
  -3  -1  -3 3025.40   86.99
  -3   1   3 2913.81   84.79
   3   1  -3 2984.90   83.99
  -3   1   3 3007.50   83.49
   3  -1   3 2856.21   85.29
   3   1  -3 2989.10   80.89
  -3   1   3 2977.50   82.09
   3   1  -3 3047.40   86.09
  -3  -1  -3 2987.90   81.79
   3  -1   3 2950.20   84.19
  -3  -1  -3 2978.60   83.29
   3  -1   3 2926.41   81.39
   3   1   3 2921.41   82.79
   3  -1  -3 2942.11   85.09
  -3   1  -3 2924.11   81.59
  -3  -1   3 2987.20   80.99
  -3  -1   3 2887.21   85.49
   3   1   3 3045.10   81.89
  -3   1  -3 2884.81   85.79
   3   1   3 2887.51   85.89
  -3  -1   3 3006.10   84.09
   3  -1  -3 3022.90   81.99
  -3   1  -3 2846.12   83.79
   3  -1  -3 2925.71   83.29
  -3   3   3 2166.28   59.89
   3   3  -3 2299.17   59.99
   3   3  -3 2257.27   58.19
   3   3  -3 2248.58   61.49
  -3  -3  -3 2158.98   59.59
   3   3  -3 2264.77   60.89
  -3  -3  -3 2196.18   61.69
  -3   3   3 2157.08   60.09
   3  -3   3 2241.68   61.19
   3  -3   3 2219.88   58.49
  -3  -3  -3 2173.58   61.79
  -3  -3  -3 2186.38   59.79
  -3  -3  -3 2070.79   59.49
   3  -3   3 2185.38   58.69
   3  -3   3 2266.57   61.49
  -3  -3  -3 2210.98   60.69
  -3   3   3 2145.89   60.29
  -3   3  -3 2223.18   58.49
   3   3   3 2219.78   61.89
  -3  -3   3 2260.67   60.69
  -3   3  -3 2134.99   60.99
  -3  -3   3 2257.47   58.29
   3  -3  -3 2160.88   59.79
  -3  -3   3 2199.78   61.39
   3  -3  -3 2173.68   61.09
  -3   3  -3 2228.18   61.29
  -3  -3   3 2219.88   59.79
  -3   3  -3 2228.88   58.69
   3   3   3 2213.88   59.79
   3  -3  -3 2170.88   60.39
   3   3   3 2076.89   60.69
   3  -3  -3 2152.18   59.99
  -3  -5  -3 2016.20   58.29
  -3  -5  -3 1986.30   54.39
  -3   5   3 2020.40   54.79
   3  -5   3 1895.41   57.49
  -3  -5  -3 1994.80   56.39
   3   5  -3 1867.21   57.39
  -3   5   3 1979.80   55.89
  -3  -5  -3 1917.41   58.09
   3   5  -3 1968.00   57.69
   3  -5   3 1941.51   51.89
   3  -5   3 1891.11   53.89
  -3  -5  -3 1968.30   56.79
   3   5  -3 1961.60   55.29
  -3   5   3 2131.89   58.59
   3  -5   3 1965.90   58.19
  -3  -5   3 1939.61   57.39
   3   5   3 1878.11   56.09
   3  -5  -3 2103.39   59.89
  -3   5  -3 1797.02   57.29
   3   5   3 2074.89   54.69
   3   5   3 2005.20   56.79
  -3  -5   3 2069.89   58.59
  -3  -5   3 1957.30   55.19
  -3   5  -3 1932.71   51.89
   3   5   3 2039.90   58.79
   3  -5  -3 2025.50   56.99
   3  -5  -3 1976.00   55.79
  -3   5  -3 1930.31   57.89
  -3   5  -3 1988.40   54.19
   3  -5  -3 2013.30   54.69
   3  -5  -3 2026.20   58.19
   3  -7   3  126.69    9.30
   3   7  -3  132.59    7.50
   3   7  -3  114.79    8.90
  -3  -7  -3  136.99    8.70
  -3  -7  -3  131.79    6.30
  -3   7   3  129.19    9.40
  -3   7   3  133.19    7.80
   3  -7   3  120.59    6.40
  -3  -7   3  123.39    9.20
  -3  -7   3  133.39    7.40
   3  -7  -3  125.69    6.20
   3   7   3  133.49    9.70
   3  -7  -3  130.29    6.50
  -3   7  -3  118.09    8.90
   3  -7  -3  123.29    7.60
   3   7   3  123.39    6.60
   3  -7  -3  127.49    8.60
  -3   7  -3  130.69    6.70
   3   7   3  111.99    7.70
  -3   9   3 1222.38   39.10
   3  -9   3 1259.77   43.90
   3  -9   3 1151.78   36.70
   3   9  -3 1199.48   38.50
  -3   9   3 1170.98   43.60
  -3  -9  -3 1177.68   34.70
  -3  -9  -3 1229.38   44.50
  -3  -9  -3 1232.38   35.20
   3   9  -3 1173.38   43.10
   3  -9  -3 1243.58   36.00
   3   9   3 1234.28   40.20
   3  -9  -3 1236.48   42.30
  -3   9  -3 1261.97   44.00
  -3   9  -3 1274.77   37.40
  -3  -9   3 1222.28   43.50
   3   9   3 1230.08   44.30
   3  -9  -3 1154.48   34.90
  -3 -11  -3  199.98   14.00
  -3  11   3  189.58   11.40
   3  11  -3  201.58   11.30
   3  11  -3  196.28   15.00
  -3  11   3  190.38   15.00
   3 -11   3  198.28   14.90
   3 -11  -3  192.78    7.20
   3 -11  -3  185.58    6.80
  -3 -11   3  175.78   14.10
   3  11   3  199.68   15.50
   3 -11  -3  188.58   13.80
   3  11   3  192.28   12.20
  -3  11  -3  209.58   10.50
  -3  11  -3  209.48   15.50
   3  13  -3   65.09    7.00
   3 -13   3   60.49   10.50
  -3  13   3   63.59    7.20
   3  13  -3   67.79   11.10
  -3 -13  -3   78.29    9.70
  -3  13   3   71.69   11.70
  -3  13  -3   65.79   11.20
   3  13   3   69.99    7.90
  -3 -13   3   57.59   10.20
   3  13   3   81.39   12.70
  -3  13  -3   76.39    6.40
   3  -1   5 1050.19   29.20
   3   1  -5  938.41   29.60
   3   1  -5  931.91   29.60
  -3  -1  -5 1042.70   30.30
   3   1  -5  953.10   28.90
  -3  -1  -5 1055.99   27.80
  -3   1   5 1037.20   30.60
  -3   1   5  971.70   29.40
   3  -1   5 1054.09   30.10
  -3   1   5 1003.70   29.10
  -3  -1  -5 1098.19   30.70
  -3  -1  -5 1041.90   30.60
   3  -1   5 1051.59   30.20
  -3   1   5 1006.40   30.40
   3   1   5 1096.19   27.80
   3  -1  -5 1001.40   29.50
   3   1   5 1064.89   30.70
  -3  -1   5  992.00   29.80
  -3   1  -5 1053.59   30.10
   3  -1  -5  985.60   30.30
   3  -1  -5  965.30   29.00
   3   1   5 1072.29   30.50
   3   1   5 1077.69   30.60
  -3  -1   5  947.61   28.80
  -3  -1   5 1000.20   29.90
  -3  -1   5  960.30   29.90
   3  -1  -5  964.10   30.20
  -3   1  -5 1027.90   29.70
  -3   1  -5 1070.99   29.90
  -3   1  -5 1039.50   29.20
  -3   1  -5 1077.69   30.30
   3  -3   5   73.29    4.30
  -3  -3  -5   79.89    5.30
   3  -3   5   80.19    5.50
  -3   3   5   83.39    5.30
   3   3  -5   90.89    4.50
   3   3  -5   83.19    4.90
  -3  -3  -5   81.59    5.10
  -3  -3  -5   81.59    4.20
  -3   3   5   74.09    4.60
   3   3  -5   88.69    5.30
   3  -3   5   70.59    4.90
  -3  -3  -5   78.29    4.10
  -3   3   5   69.49    5.00
  -3  -3  -5   79.99    5.80
  -3  -3  -5   81.69    5.90
   3  -3   5   74.49    4.30
   3   3  -5   78.59    5.50
  -3  -3   5   76.79    4.80
   3  -3  -5   74.79    5.10
   3  -3  -5   80.89    5.50
   3  -3  -5   85.69    5.60
  -3   3  -5   78.49    5.30
  -3   3  -5   83.89    4.50
  -3  -3   5   80.39    4.40
  -3   3  -5   81.19    4.40
   3  -3  -5   80.29    5.10
  -3  -3   5   77.19    5.40
  -3  -3   5   75.89    4.80
  -3   3  -5   72.99    5.10
   3   3   5   71.19    5.20
   3   3   5   78.39    5.10
   3  -3  -5   83.09    4.80
  -3   5   5  740.53   26.30
   3  -5   5  708.63   25.40
  -3  -5  -5  740.53   26.80
  -3  -5  -5  703.33   23.70
  -3  -5  -5  703.33   24.90
   3  -5   5  738.83   21.60
   3   5  -5  748.23   21.30
  -3  -5  -5  753.72   24.00
  -3   5   5  747.03   24.90
   3   5  -5  772.62   25.90
  -3  -5  -5  735.93   24.20
   3  -5   5  706.63   22.60
  -3   5   5  749.13   24.20
   3   5  -5  756.02   23.80
   3  -5   5  708.43   26.00
  -3  -5   5  788.32   21.50
   3   5   5  749.62   24.20
  -3  -5   5  730.43   23.70
  -3  -5   5  752.12   26.50
   3  -5  -5  723.23   23.90
  -3   5  -5  748.43   21.60
   3   5   5  737.73   25.30
   3  -5  -5  718.53   24.80
   3  -5  -5  738.53   26.10
   3  -5  -5  714.13   24.50
  -3  -5   5  755.22   25.40
  -3   5  -5  723.33   25.90
   3  -5  -5  738.13   24.70
  -3   7   5  229.08   10.50
  -3  -7  -5  232.78   11.70
  -3   7   5  226.38   13.20
  -3  -7  -5  226.88   11.40
   3   7  -5  223.38   10.60
  -3   7   5  231.78   11.70
   3  -7   5  209.58    9.50
   3  -7   5  220.98   13.00
   3   7  -5  225.98   12.80
   3   7   5  224.78   12.00
  -3   7  -5  215.08   12.80
   3   7   5  213.08   13.10
  -3  -7   5  218.08   10.40
  -3  -7   5  246.98   13.80
   3   7   5  233.78   10.60
  -3   7  -5  221.58    9.70
   3  -7  -5  226.88   10.30
   3  -7  -5  230.18   12.20
  -3   9   5  127.99   10.90
  -3  -9  -5  104.79    6.90
   3  -9   5  118.79   10.50
   3  -9   5  119.69    7.20
  -3  -9  -5  114.59    9.20
   3   9  -5  131.59   10.80
  -3   9   5  131.29    9.20
   3   9  -5  145.99    8.70
   3  -9  -5  143.19    8.10
   3  -9  -5  122.19    7.40
  -3   9  -5  132.49    7.50
   3   9   5  113.09   10.40
  -3  -9   5  140.69   11.50
  -3   9  -5  131.49   11.00
   3   9   5  113.39    7.00
   3  -9  -5  128.89   11.60
   3   9   5  121.99    9.30
   3 -11   5  219.08   16.00
  -3 -11  -5  214.18   14.40
  -3 -11  -5  195.78    9.40
  -3  11   5  189.78   14.90
   3  11  -5  205.68   11.60
  -3 -11  -5  189.98    9.50
  -3  11   5  217.18   13.00
   3  11  -5  214.38   15.70
  -3 -11   5  208.38   15.70
  -3  11  -5  215.68   15.70
  -3  11  -5  221.08   10.70
   3  11   5  209.18   13.30
   3 -11  -5  203.78   10.40
   3 -11  -5  214.68   14.70
   3  11   5  235.28   16.80
   3 -11  -5  202.18    9.80
  -3 -13  -5    6.90    4.00
  -3 -13  -5    6.80    4.80
   3  13  -5   11.30    5.30
  -3  13   5    8.40    3.50
   3  13  -5    5.80    3.20
   3 -13   5   18.30    6.00
  -3  13   5    7.80    4.00
   3  13   5    6.10    3.60
   3  13   5   14.60    5.50
  -3 -13   5    5.60    4.00
  -3  13  -5    6.80    2.70
   3 -13  -5    7.00    5.20
  -3  13  -5   11.30    5.40
   3   1  -7  246.78    9.70
   3  -1   7  219.38   10.10
  -3   1   7  268.87   11.30
  -3  -1  -7  228.78   11.70
   3  -1   7  233.38    9.40
   3  -1   7  234.28   10.50
   3   1  -7  248.38   10.80
  -3  -1  -7  245.28    8.40
  -3  -1  -7  238.38   10.80
  -3  -1  -7  243.68   10.80
   3   1  -7  238.28   10.60
   3   1  -7  233.18   10.00
  -3   1   7  260.97   10.20
  -3   1   7  257.67    9.60
   3   1  -7  238.18   10.30
   3  -1  -7  278.17   12.50
   3  -1  -7  261.07   11.30
   3   1   7  236.88   10.50
  -3  -1   7  247.38   10.20
   3   1   7  234.98   10.70
  -3   1  -7  218.08    9.20
   3  -1  -7  264.17    9.70
  -3   1  -7  226.98   10.30
   3  -1  -7  265.57   11.20
  -3   1  -7  238.48   10.40
  -3   1  -7  237.88   10.30
  -3  -1   7  235.58   10.50
   3   1   7  230.98   10.80
  -3   1  -7  215.68   10.10
  -3  -1   7  242.78    9.70
   3   1   7  239.08    8.30
  -3  -3  -7 3246.88   91.39
  -3   3   7 3171.88   90.49
   3   3  -7 3132.89   90.29
   3  -3   7 3267.57   88.89
   3  -3   7 3120.69   89.89
  -3  -3  -7 3334.07   87.09
   3   3  -7 3276.07   88.69
   3   3  -7 3335.47   89.69
  -3  -3  -7 3251.47   90.49
  -3  -3  -7 3273.07   91.39
  -3  -3  -7 3274.77   90.39
  -3   3   7 3294.27   90.69
   3  -3   7 3190.98   89.99
   3   3  -7 3277.67   89.39
  -3   3  -7 3217.58   91.89
  -3   3  -7 3310.97   88.99
  -3  -3   7 3304.87   90.69
  -3   3  -7 3324.37   90.49
   3  -3  -7 3268.47   90.49
  -3  -3   7 3226.98   89.09
  -3   3  -7 3261.67   88.89
   3  -3  -7 3221.18   88.49
   3   3   7 3248.58   90.79
   3   3   7 3212.88   86.79
   3  -3  -7 3216.68   90.59
   3  -3  -7 3339.07   90.79
   3  -3  -7 3302.07   90.49
  -3   3  -7 3336.77   88.89
   3   3   7 3378.06   90.69
  -3  -3   7 3229.68   88.79
  -3  -5  -7  125.39    7.80
  -3  -5  -7  127.49    9.10
  -3   5   7  131.09    8.40
   3   5  -7  137.89    8.60
   3  -5   7  112.29    6.60
  -3  -5  -7  137.39    7.20
   3  -5   7  130.19    6.60
  -3  -5  -7  141.39    7.10
   3  -5   7  129.89    8.80
  -3   5   7  121.99    8.00
   3   5  -7  132.09    7.50
   3   5  -7  135.09    6.50
  -3   5  -7  128.29    6.50
  -3  -5   7  116.49    7.20
  -3   5  -7  122.89    6.80
   3  -5  -7  130.89    8.00
   3   5   7  124.39    7.90
  -3  -5   7  129.69    8.90
   3   5   7  122.39    8.40
   3  -5  -7  138.49    9.30
   3  -5  -7  147.69    7.90
  -3   5  -7  132.19    8.70
  -3  -5   7  127.39    6.40
  -3  -5   7  122.59    7.90
  -3  -7  -7 1048.00   41.50
   3   7  -7 1062.59   36.60
   3  -7   7 1005.70   32.50
   3   7  -7 1035.40   29.30
   3  -7   7 1040.70   29.90
   3   7  -7 1017.90   29.20
  -3  -7  -7 1049.70   33.90
  -3   7   7 1081.69   35.80
  -3  -7  -7  980.60   33.90
  -3   7   7 1034.40   34.20
   3   7  -7 1047.50   33.40
  -3   7  -7 1067.09   37.20
   3  -7  -7 1031.00   37.60
  -3  -7   7 1052.19   41.50
  -3  -7   7 1032.70   40.90
   3  -7  -7 1026.60   34.70
   3   7   7 1020.70   35.90
   3   7   7 1079.69   34.40
  -3   7  -7 1003.20   29.60
  -3   7  -7 1067.69   32.40
  -3  -9  -7  403.56   18.50
   3  -9   7  410.86   21.40
   3   9  -7  422.06   21.00
  -3   9   7  394.76   18.90
   3  -9   7  366.56   15.40
   3   9  -7  411.96   17.20
  -3   9   7  394.16   17.00
  -3  -9  -7  405.66   22.00
  -3   9   7  395.56   21.30
  -3   9  -7  412.56   15.90
   3  -9  -7  403.66   21.60
  -3   9  -7  362.06   20.20
   3   9   7  400.86   17.00
  -3  -9   7  422.76   21.70
   3   9   7  406.56   19.50
  -3 -11  -7  466.85   26.30
  -3  11   7  468.85   22.00
   3  11  -7  451.65   19.40
   3 -11   7  483.95   25.50
  -3 -11  -7  438.66   21.80
   3  11  -7  474.35   24.90
  -3 -11   7  465.55   25.20
   3 -11  -7  465.05   22.90
  -3  11  -7  448.26   24.30
   3  11   7  479.15   22.60
   3 -11  -7  417.36   24.90
   3 -11  -7  448.06   18.90
   3  11   7  454.85   18.40
  -3  11  -7  452.95   17.90
  -3 -13  -7   64.09   12.10
  -3 -13  -7   48.60    8.60
   3 -13   7   50.09   10.40
  -3  13   7   58.79    7.70
   3  13  -7   47.60    6.90
   3  13  -7   52.59   10.00
   3 -13  -7   45.00    9.70
  -3  13  -7   44.80    5.40
   3  13   7   45.30    7.90
   3 -13  -7   47.50    7.80
   3 -13  -7   50.59   10.70
  -3  13  -7   46.00    9.40
  -3 -13   7   54.99   10.90
   3  -1   9   51.69    4.00
   3   1  -9   37.80    4.20
   3   1  -9   44.50    4.70
   3  -1   9   49.90    4.70
  -3  -1  -9   54.89    3.40
   3   1  -9   38.60    4.90
  -3   1   9   38.20    3.50
   3   1  -9   44.40    4.00
   3  -1   9   55.59    5.00
  -3   1   9   34.90    4.30
   3   1  -9   39.70    3.90
  -3   1   9   30.70    3.50
   3   1   9   64.09    5.50
  -3   1  -9   61.59    5.30
   3  -1  -9   43.70    4.20
  -3  -1   9   32.60    4.00
   3  -1  -9   42.90    3.70
  -3  -1   9   42.30    3.80
  -3  -1   9   37.60    3.90
  -3   1  -9   58.89    4.90
   3  -1  -9   42.60    4.70
   3   1   9   41.70    4.50
   3   1   9   53.69    5.10
   3  -3   9  306.27   13.40
   3   3  -9  312.47   13.10
   3  -3   9  312.87   13.30
  -3   3   9  278.07   13.90
  -3   3   9  291.97   11.80
   3   3  -9  301.87   13.80
   3  -3   9  321.77   13.70
   3   3  -9  296.27   12.90
  -3  -3  -9  306.67   14.60
  -3   3   9  298.67   14.30
  -3  -3  -9  300.57   10.80
   3   3  -9  316.87   13.70
  -3   3  -9  316.37   13.90
   3   3   9  310.07   14.50
  -3  -3   9  295.47   14.70
   3   3   9  304.17   14.30
  -3   3  -9  315.77   13.30
   3   3   9  304.77   10.70
   3  -3  -9  283.77   13.60
  -3  -3   9  291.17   12.70
  -3   3  -9  314.27   13.20
  -3  -3   9  310.07   13.90
  -3  -3   9  307.47   13.20
  -3   3  -9  313.97   13.20
   3  -3  -9  266.97   13.30
   3  -3  -9  274.37   11.70
  -3   3  -9  284.57   13.10
   3  -5   9  295.57   15.10
  -3  -5  -9  346.37   16.70
  -3   5   9  305.77   15.10
  -3   5   9  325.07   15.30
   3  -5   9  313.07   13.00
   3   5  -9  289.17   14.20
   3   5  -9  278.77   12.40
  -3  -5  -9  308.87   12.30
  -3  -5  -9  326.17   12.40
  -3   5   9  314.07   13.30
   3   5  -9  313.17   13.90
  -3   5  -9  291.17   12.70
   3   5   9  323.07   15.20
   3  -5  -9  331.17   16.10
   3   5   9  305.07   15.30
  -3   5  -9  288.07   14.70
  -3  -5   9  303.17   15.30
  -3   5  -9  296.87   13.10
  -3  -5   9  306.27   12.80
   3  -5  -9  307.67   13.40
  -3   5  -9  303.57   13.10
  -3   7   9  244.88   14.10
   3  -7   9  283.37   11.00
  -3  -7  -9  242.78   15.30
   3  -7   9  258.77   15.30
  -3   7   9  248.08   13.50
   3  -7   9  228.48   11.60
  -3  -7  -9  249.08   12.40
   3   7  -9  240.88   14.00
   3   7  -9  227.18   10.10
   3   7  -9  234.88   12.30
  -3  -7  -9  268.97   12.40
  -3  -7   9  247.08   10.50
   3  -7  -9  257.27   15.40
  -3   7  -9  256.17   10.60
   3   7   9  275.07   14.00
  -3   7  -9  253.57   11.80
   3   7   9  282.37   15.20
   3  -7  -9  245.78   12.70
  -3  -7   9  257.67   15.30
  -3   7  -9  271.17   15.20
   3   9  -9  370.16   19.70
   3   9  -9  358.76   16.20
  -3   9   9  339.57   18.10
   3  -9   9  377.26   20.70
  -3  -9  -9  324.47   16.30
  -3  -9  -9  368.26   21.00
  -3   9   9  353.56   17.30
   3  -9  -9  357.86   20.60
   3   9   9  331.97   18.40
  -3   9  -9  358.16   15.10
  -3   9  -9  336.57   19.20
   3   9   9  338.87   16.70
  -3  -9   9  376.86   20.90
  -3   9  -9  335.07   10.40
  -3 -11  -9   70.09   11.90
   3  11  -9   71.99    9.30
  -3 -11  -9   78.19    8.20
  -3  11   9   65.59    8.30
   3 -11  -9   68.69    8.00
   3  11   9   79.79    8.90
  -3 -11   9   97.69   20.00
   3  11   9   61.69    7.00
  -3  11  -9   68.59    6.20
   3 -11  -9   66.79    7.40
  -3  11  -9   65.09   10.20
   3 -11  -9   79.19   12.30
  -3  13   9   18.20    6.40
  -3 -13  -9   15.90    4.30
   3 -13   9   23.50    7.20
   3  13  -9   22.20    5.10
   3  13  -9   15.70    5.70
  -3 -13  -9   16.30    5.40
  -3 -13  -9   18.30    6.50
  -3 -13   9   28.60    6.90
  -3  13  -9   25.60    7.10
   3 -13  -9   22.50    4.80
   3 -13  -9   21.70    7.80
   3  13   9   18.30    5.90
  -3   1  11 1403.56   41.70
  -3  -1 -11 1405.56   44.50
  -3  -1 -11 1300.27   40.00
  -3   1  11 1448.85   45.80
   3   1 -11 1441.06   42.90
   3   1 -11 1331.67   42.50
   3   1 -11 1475.35   45.40
  -3  -1 -11 1436.66   45.50
   3  -1  11 1403.56   41.80
  -3   1  11 1343.47   42.90
   3  -1  11 1443.16   45.30
  -3  -1  11 1484.55   43.30
  -3   1 -11 1442.66   44.20
  -3  -1  11 1485.85   45.40
   3  -1 -11 1409.66   45.50
   3   1  11 1393.76   45.50
   3  -1 -11 1326.97   41.50
  -3   1 -11 1453.25   44.80
  -3  -1  11 1434.36   42.90
  -3   1 -11 1354.86   41.70
   3  -1 -11 1401.76   43.20
   3   1  11 1398.36   45.10
   3   1  11 1394.16   40.20
  -3  -3 -11 1419.16   41.60
  -3   3  11 1445.36   47.70
   3   3 -11 1480.75   46.70
  -3   3  11 1415.16   47.50
   3  -3  11 1518.15   46.50
  -3  -3 -11 1543.65   48.30
   3   3 -11 1541.15   45.80
  -3   3  11 1462.95   43.40
   3  -3  11 1492.25   45.80
  -3  -3  11 1462.45   46.10
   3   3  11 1446.96   47.70
   3   3  11 1463.25   47.80
  -3  -3  11 1471.15   46.40
   3  -3 -11 1428.26   47.80
  -3   3 -11 1536.15   46.80
  -3  -3  11 1440.26   45.00
   3  -3 -11 1528.15   47.10
  -3   3 -11 1554.94   46.40
   3  -3 -11 1419.06   43.40
   3   3  11 1515.75   41.70
  -3  -5 -11   56.69    4.50
   3   5 -11   64.19    6.20
   3   5 -11   59.69    6.20
  -3  -5 -11   63.99    7.40
  -3   5  11   72.59    7.50
  -3   5  11   66.89    5.60
   3  -5  11   50.79    6.30
  -3  -5 -11   59.69    4.50
  -3   5  11   63.39    6.90
   3  -5  11   53.89    5.30
  -3   5 -11   51.99    6.20
   3   5  11   67.79    7.20
   3  -5 -11   73.19    5.80
  -3   5 -11   62.89    5.90
   3  -5 -11   69.69    7.30
   3   5  11   61.89    8.00
  -3  -5  11   70.89    6.00
  -3  -5  11   72.59    7.50
   3   7 -11   60.99    6.20
  -3  -7 -11   62.69    7.90
  -3  -7 -11   44.40    5.20
  -3   7  11   50.69    6.40
   3  -7  11   52.49    4.90
   3   7 -11   50.99    5.10
   3  -7  11   60.69    7.60
  -3   7  11   52.99    7.10
   3   7 -11   57.29    6.70
  -3  -7 -11   53.19    4.80
  -3  -7  11   54.79    7.50
  -3   7 -11   48.90    5.30
  -3   7 -11   57.09    6.80
   3  -7 -11   58.49    5.80
  -3   7 -11   45.90    5.40
  -3  -7  11   54.59    4.90
   3   7  11   51.09    8.00
   3   7  11   52.69    6.60
   3  -7 -11   58.99    7.20
   3   9 -11  365.26   20.00
  -3   9  11  368.86   18.90
   3   9 -11  348.37   12.80
   3   9 -11  362.16   14.50
   3  -9  11  350.36   13.30
   3  -9  11  332.57   20.60
  -3  -9 -11  386.56   17.20
  -3   9  11  370.06   20.10
  -3  -9 -11  385.06   22.20
  -3  -9  11  372.76   21.40
  -3   9 -11  353.36   20.20
  -3   9 -11  340.67   13.20
   3   9  11  378.36   18.90
   3  -9 -11  372.26   21.60
   3   9  11  401.16   21.10
  -3   9 -11  355.46   16.10
   3  -9 -11  412.16   21.20
   3 -11  11  257.37   19.10
  -3 -11 -11  277.17   15.60
  -3  11  11  251.47   17.00
  -3 -11 -11  269.47   20.10
  -3  11  11  250.27   15.20
   3  11 -11  250.67   14.10
   3  11 -11  258.67   18.00
   3  11  11  258.47   15.20
   3 -11 -11  251.77   15.60
  -3  11 -11  281.17   13.40
   3 -11 -11  264.07   19.40
   3 -11 -11  245.08   15.40
  -3  11 -11  260.87   19.00
  -3 -11  11  258.17   19.00
   3  11  11  254.27   17.40
  -3  -1 -13 1058.89   32.90
  -3  -1 -13 1132.59   37.90
   3  -1  13 1133.49   34.90
   3   1 -13 1110.29   36.10
   3  -1  13 1127.19   38.80
  -3   1  13 1102.19   34.60
  -3   1  13 1080.79   38.90
   3   1 -13 1159.78   39.30
  -3  -1 -13 1117.09   39.00
  -3   1 -13 1146.89   37.60
   3  -1 -13 1031.00   34.20
   3  -1 -13 1096.69   36.40
  -3  -1  13 1102.59   38.70
   3   1  13 1090.09   39.10
   3   1  13 1127.09   33.10
   3  -1 -13 1114.79   39.10
  -3   1 -13 1048.00   34.50
  -3  -1  13 1069.99   35.60
  -3   1 -13 1144.69   38.90
  -3   3  13  395.86   15.40
   3   3 -13  445.56   25.70
   3  -3  13  400.96   18.80
  -3   3  13  387.06   19.50
  -3  -3 -13  390.16   13.80
   3  -3  13  395.66   17.40
   3   3 -13  389.76   17.40
  -3  -3 -13  413.06   19.50
   3  -3 -13  392.26   19.70
   3  -3 -13  411.36   18.60
  -3  -3  13  397.56   18.10
  -3   3 -13  384.66   18.00
   3   3  13  412.56   19.90
   3  -3 -13  382.86   16.10
  -3  -3  13  393.36   18.50
  -3   3 -13  390.16   18.10
   3   3  13  396.66   19.60
   3   3  13  425.36   14.00
  -3   5  13   29.70    6.20
   3   5 -13   29.70    5.60
   3   5 -13   22.00    4.70
  -3  -5 -13   18.30    2.80
  -3   5  13   22.10    5.50
  -3  -5 -13   21.80    5.50
  -3  -5 -13   17.50    2.80
   3  -5  13   18.10    4.30
   3  -5  13   18.40    4.00
  -3   5  13   21.50    3.70
  -3  -5  13   22.90    5.00
   3  -5 -13   21.80    3.80
  -3  -5  13   26.80    4.90
  -3   5 -13   19.00    4.20
   3   5  13   20.10    5.10
  -3   5 -13   30.00    5.80
   3   5  13   17.10    4.60
   3   7 -13  626.94   27.40
  -3  -7 -13  670.23   30.20
  -3  -7 -13  606.24   22.50
  -3  -7 -13  651.53   22.60
   3  -7  13  653.93   28.80
  -3   7  13  667.13   29.20
   3  -7  13  657.03   24.40
   3   7 -13  643.04   26.00
  -3   7  13  649.14   28.10
  -3   7 -13  622.04   24.80
   3   7  13  693.93   29.90
   3   7  13  674.13   28.50
  -3  -7  13  645.14   29.00
   3  -7 -13  652.33   24.30
  -3   7 -13  625.74   28.00
   3  -7 -13  646.54   29.20
  -3  -7  13  644.24   24.20
  -3   9  13   60.19    9.60
  -3  -9 -13   48.20    5.70
   3   9 -13   49.00    5.00
  -3  -9 -13   57.39   10.00
   3  -9  13   65.59    5.50
   3   9 -13   74.69    7.60
   3  -9  13   61.09   10.20
   3   9 -13   63.99    8.10
  -3   9  13   59.79    7.90
  -3   9 -13   67.89    8.70
   3  -9 -13   61.79    7.90
   3   9  13   59.09    9.10
   3   9  13   58.09    9.20
  -3  -9  13   68.39    9.30
  -3   9 -13   67.19    8.10
   3  -9 -13   59.09   10.00
  -3  11  13  168.88   13.50
   3 -11  13  168.78   16.10
   3  11 -13  173.58   14.70
   3  11 -13  181.98   12.10
  -3 -11 -13  163.48   11.50
  -3  11  13  186.38   15.10
  -3 -11 -13  191.38   16.90
  -3  11 -13  173.38   11.00
   3 -11 -13  169.78   15.50
  -3 -11  13  158.48   15.80
   3  11  13  177.08   15.30
   3 -11 -13  156.18   12.10
  -3  11 -13  179.38   15.20
   3  11  13  167.38   13.40
   3  -1  15   16.40    3.20
   3   1 -15   19.40    4.20
   3   1 -15   19.90    4.90
  -3   1  15   14.50    4.80
   3  -1  15   23.60    5.40
  -3  -1 -15   15.50    4.10
  -3  -1 -15   13.90    3.90
  -3  -1 -15   11.70    2.70
  -3   1  15    9.90    2.80
   3  -1 -15   16.30    4.00
  -3   1 -15   24.00    5.00
   3   1  15   11.60    2.40
  -3  -1  15   17.60    3.90
  -3  -1  15   20.50    5.00
  -3   1 -15   19.00    4.60
  -3   1 -15   13.40    5.10
   3  -1 -15   11.90    3.00
   3  -1 -15   12.80    4.40
   3   1  15   10.40    3.90
  -3   3  15  439.06   22.60
   3  -3  15  519.25   22.40
   3  -3  15  489.85   20.30
  -3  -3 -15  418.86   15.20
  -3   3  15  441.76   17.20
  -3  -3 -15  485.05   23.60
   3   3 -15  447.36   19.90
  -3  -3 -15  460.35   21.90
   3   3 -15  464.75   21.80
  -3  -3  15  437.26   21.20
   3  -3 -15  404.86   17.00
   3   3  15  462.95   18.40
  -3   3 -15  476.85   21.20
   3  -3 -15  454.55   21.00
   3  -3 -15  468.55   23.20
  -3  -3  15  451.25   20.40
  -3   3 -15  491.15   21.70
   3   3  15  481.25   23.30
  -3   5  15   64.29    8.40
   3  -5  15   76.69    7.60
  -3   5  15   62.69    5.70
   3   5 -15   80.99    8.30
  -3  -5 -15   77.79    5.70
  -3  -5 -15   73.39    4.70
   3   5 -15   83.79    8.00
  -3  -5 -15   80.39    9.20
   3  -5  15   65.69    7.60
   3   5  15   73.29    8.70
   3  -5 -15   61.99    5.80
  -3   5 -15   82.99    8.50
   3  -5 -15   74.49    8.50
   3  -5 -15   76.59    9.20
  -3  -5  15   74.59    7.60
   3   5  15   75.79    9.00
  -3   5 -15   75.39    7.80
  -3  -5  15   66.29    8.00
   3  -7  15   60.49    9.60
   3   7 -15   59.69    7.20
  -3  -7 -15   50.19    8.80
  -3   7  15   60.29    9.50
  -3  -7 -15   52.19    4.60
  -3   7  15   39.90    7.70
   3   7 -15   63.09    7.70
   3  -7  15   58.19    6.50
  -3   7 -15   60.89    9.30
   3   7  15   53.39    9.50
  -3   7 -15   56.49    6.60
   3  -7 -15   60.19    9.70
   3   7  15   56.69    9.00
  -3  -7  15   66.29    6.90
   3  -7 -15   54.39    9.70
  -3  -7  15   62.49    8.30
   3  -7 -15   49.99    5.40
  -3  -9 -15    1.60    3.40
  -3   9  15    5.00    3.40
   3  -9  15    4.60    4.30
   3   9 -15    2.80    3.00
  -3  -9 -15    7.70    2.50
   3   9 -15    4.20    2.90
   3   9 -15    4.70    3.70
  -3   9  15    7.40    3.90
   3  -9  15    8.80    3.10
   3  -9 -15    2.50    3.30
   3  -9 -15    6.10    4.20
  -3   9 -15    7.50    4.00
   3   9  15    5.90    3.80
  -3   9 -15    6.40    3.40
  -3  -9  15    5.70    4.60
   3   9  15   11.30    4.90
  -3  -1 -17  116.29   11.00
   3  -1  17  126.09    8.30
  -3   1  17  124.99    8.20
   3  -1  17  128.39   11.50
  -3  -1 -17  121.09   10.40
  -3   1  17  130.59   11.90
   3   1 -17  139.69   11.90
  -3   1 -17  125.99   11.10
  -3  -1  17  123.09    9.00
   3  -1 -17  122.99   11.30
   3  -1 -17  126.89    9.70
  -3   1 -17  120.09   10.10
   3   1  17  116.39    7.00
  -3  -1  17  116.79   11.00
   3   1  17  131.39   11.90
  -3   3  17  207.38   15.10
   3   3 -17  210.98   14.50
  -3  -3 -17  198.18   15.10
  -3  -3 -17  173.28    7.80
   3   3 -17  185.08   12.00
  -3   3  17  193.48   10.00
   3  -3  17  206.18   14.00
   3  -3  17  181.68   13.60
  -3  -3 -17  196.88   13.90
   3  -3 -17  174.38   12.70
  -3  -3  17  192.78   12.40
   3  -3 -17  232.98   15.90
  -3  -3  17  203.48   14.00
   3   3  17  199.78   15.00
   3   3  17  187.08    7.80
   3  -3 -17  146.29   10.60
  -3   3 -17  190.98   13.10
  -3   3 -17  216.08   14.40
   3   5 -17  226.38   14.90
   3  -5  17  202.48   13.90
  -3  -5 -17  193.18   15.10
  -3  -5 -17  196.08    7.40
  -3   5  17  208.78   15.70
   3  -5  17  190.78   13.40
   3   5 -17  235.58   14.40
   3  -5 -17  215.78   15.20
  -3  -5  17  188.18   13.50
   3  -5 -17  224.28   23.80
  -3   5 -17  201.98   14.00
   3   5  17  214.88   16.20
   3  -5 -17  204.18   10.50
  -3  -5  17  225.08   14.80
  -3   5 -17  220.18   14.20
  -3  -7 -17    3.30    3.70
   3  -7  17    1.00    2.70
   3  -7  17    7.00    3.60
   3   7 -17    7.20    3.70
  -3  -7 -17    4.60    4.50
   3   7 -17    5.80    3.40
  -3   7  17    8.50    4.30
  -3   7 -17    2.80    3.10
   3   7  17    8.40    3.90
   3   7  17    3.90    3.20
   3  -7 -17   12.30    5.90
  -3  -7  17    4.10    3.80
  -3  -7  17    4.80    2.90
  -3   7 -17    2.40    3.50
   3  -7 -17    6.30    4.50
   3  -7 -17    7.20    2.70
   3  -9  17  185.08   16.20
  -3   9  17  217.98   16.70
   3  -9  17  185.88   12.10
   3   9 -17  213.78   14.60
   3   9 -17  186.58   12.10
   3   9 -17  181.48   15.90
  -3  -9 -17  217.88   18.10
  -3  -9 -17  193.58   17.40
   3  -9 -17  200.28   17.40
   3   9  17  202.08   17.10
  -3   9 -17  198.98   13.50
   3  -9 -17  256.67   18.70
  -3  -9  17  233.78   17.90
  -3   9 -17  217.38   16.40
   3   9  17  202.08   16.10
   3   1 -19   40.50    6.50
  -3   1  19   39.00    5.00
   3  -1  19   49.10    5.50
  -3  -1 -19   29.30    6.20
  -3  -1 -19   33.70   10.20
  -3   1  19   26.40    6.90
   3   1 -19   37.70    8.80
   3  -1 -19   40.30    6.50
   3   1  19   37.00    8.20
  -3   1 -19   47.50    8.70
   3  -1 -19   36.50    7.20
  -3   1 -19   38.00    6.70
   3   1  19   40.00    4.00
   3  -3  19    6.90    4.10
  -3   3  19    6.60    4.50
  -3  -3 -19    8.90    4.20
  -3   3  19    5.70    2.40
   3  -3  19    3.90    3.10
   3   3 -19    5.90    4.00
  -3  -3 -19    9.70    4.70
   3   3 -19   10.60    4.00
  -3  -3  19    4.50    3.20
   3   3  19    4.40    4.00
  -3   3 -19   13.10    4.00
   3  -3 -19    6.50    4.30
  -3  -3  19    3.50    3.40
   3  -3 -19    8.90    3.90
  -3   3 -19    7.50    4.30
   3  -5  19   46.00    7.60
   3  -5  19   58.69    8.00
  -3  -5 -19   49.40    8.80
  -3   5  19   47.10    9.20
   3   5 -19   51.29    8.20
  -3  -5 -19   38.40    8.50
   3  -5 -19   49.99   10.00
   3  -5 -19   49.10    8.60
  -3   5 -19   50.29    8.40
   3   5  19   32.00    7.70
  -3   5 -19   47.40    8.30
  -3  -5  19   57.89    7.80
  -3  -5  19   52.59    8.70
   3   7 -19   33.50    7.60
  -3   7  19   32.20    8.10
  -3  -7 -19   36.10    9.60
   3  -7  19   39.80    8.10
  -3  -7 -19   34.80    7.90
   3   7 -19   30.30    6.90
   3  -7  19   41.60    7.30
   3  -7 -19   36.70    9.00
  -3   7 -19   30.30    6.90
  -3  -7  19   36.10    6.60
   3   7  19   33.20    7.60
   3  -7 -19   36.50    7.90
  -3   7 -19   36.10    7.20
  -3  -7  19   28.70    7.10
   3  -1  21  179.08   15.50
   3   1 -21  176.28   12.60
   3   1 -21  190.28   16.00
  -3  -1 -21  181.68   16.10
  -3  -1 -21  175.88   13.70
  -3   1  21  168.88   10.20
   3  -1  21  173.28   10.20
  -3   1  21  181.78   16.00
   3  -1 -21  178.58   15.60
  -3  -1  21  199.08   11.90
   3  -1 -21  162.68   12.60
  -3  -1  21  175.48   15.20
  -3   1 -21  161.58   13.20
  -3   1 -21  209.58   16.40
   3   1  21  165.98   15.40
  -3  -3 -21   90.59   10.70
   3  -3  21   99.79   11.50
   3   3 -21  108.49   12.10
  -3   3  21  104.99   12.10
   3   3 -21   89.79    9.40
   3  -3  21   76.99    8.40
  -3  -3 -21   74.89   12.00
  -3   3 -21   83.69   10.70
   3  -3 -21   99.59   10.20
  -3   3 -21   93.99   10.00
  -3  -3  21   99.99   11.50
   3   3  21   80.09   10.80
  -3  -3  21   87.99    9.30
   3  -3 -21   92.59   11.80
  -4   0   0    0.00    0.10
   4   0   0    0.00    0.10
   4   2   0 2176.38   58.69
   4  -2   0 2238.38   58.69
  -4  -2   0 2178.88   58.39
  -4   2   0 2145.19   56.99
  -4  -2   0 2162.08   58.59
   4   2   0 2130.69   58.19
   4  -2   0 2149.28   56.79
   4  -2   0 2186.98   58.79
  -4  -4   0 2135.49   55.79
  -4  -4   0 2150.18   59.89
  -4   4   0 2053.19   59.89
   4   4   0 2079.99   59.59
   4  -4   0 2103.09   60.09
   4  -4   0 2137.19   57.39
   4  -4   0 2186.48   60.29
  -4  -4   0 2083.69   59.99
  -4   4   0 2103.19   57.39
   4   4   0 2146.19   55.79
  -4  -4   0 2061.09   58.69
   4  -4   0 2162.58   56.39
   4   4   0 2210.88   59.19
   4   4   0 2139.09   60.39
  -4   4   0 2186.38   60.49
   4  -6   0   24.40    1.70
  -4  -6   0   27.20    3.20
  -4  -6   0   24.70    1.10
   4   6   0   24.50    3.10
   4  -6   0   24.10    2.70
  -4   6   0   28.90    5.00
   4   6   0   23.70    4.00
  -4  -6   0   20.40    3.80
   4  -6   0   23.70    2.10
   4   6   0   22.70    4.10
   4  -6   0   24.40    4.30
   4   8   0   25.50    5.50
  -4   8   0   23.30    5.20
   4   8   0   30.30    4.70
   4  -8   0   22.50    4.80
  -4  -8   0   24.80    5.20
  -4   8   0   22.60    3.50
   4 -10   0 1312.37   46.50
  -4  10   0 1280.47   47.00
  -4 -10   0 1297.27   46.10
   4  10   0 1298.57   47.40
  -4  10   0 1291.77   40.20
   4  10   0 1301.77   42.20
   4  12   0  171.88   11.30
  -4  12   0  157.28   14.20
   4 -12   0  180.78   14.40
  -4  12   0  151.98    9.60
   4  12   0  182.28   15.20
  -4 -12   0  168.48   13.90
   4  14   0   69.39    8.00
   4  14   0   87.69   14.00
  -4 -14   0  100.19   11.70
   4 -14   0   87.39   11.20
  -4  14   0   98.09   12.10
  -4  14   0   75.59    8.10
  -4   0  -2    1.60    0.60
   4   0   2    1.20    0.30
   4   0  -2    1.20    0.50
  -4   0   2    2.00    0.60
  -4   0  -2    1.50    0.30
   4   0   2    0.80    0.60
   4   0   2    1.20    0.60
  -4   0  -2    1.50    0.70
  -4   0   2    1.00    0.60
   4   0  -2    2.70    0.70
   4   0  -2    1.30    0.60
  -4   0  -2    2.60    0.80
  -4   0   2    2.60    0.70
   4   0   2    2.60    0.70
   4   2  -2 2160.48   59.09
   4   2  -2 2154.18   58.99
   4   2  -2 2144.39   57.79
  -4  -2  -2 2236.88   60.29
   4   2  -2 2150.18   59.79
  -4  -2  -2 2180.58   60.29
   4  -2   2 2125.59   58.09
  -4  -2  -2 2218.38   59.59
   4  -2   2 2201.98   59.69
   4   2  -2 2129.09   57.79
   4  -2   2 2179.18   59.69
   4  -2   2 2206.38   57.59
  -4   2   2 2173.98   58.89
  -4   2  -2 2153.88   58.59
   4   2   2 2241.58   58.39
   4  -2  -2 2241.98   58.79
  -4  -2   2 2245.38   59.19
   4  -2  -2 2227.78   59.39
   4   2   2 2308.27   58.89
  -4   2  -2 2213.28   59.79
  -4   2  -2 2161.88   59.59
   4  -2  -2 2235.58   59.49
  -4   2  -2 2186.08   57.59
  -4  -2   2 2221.18   57.89
  -4  -2   2 2238.58   59.09
   4  -4   2  230.08   10.20
   4   4  -2  196.98    9.60
   4  -4   2  225.98    6.90
  -4   4   2  215.98    8.10
  -4   4   2  225.78   10.20
  -4  -4  -2  221.98    9.40
  -4  -4  -2  224.28   10.40
   4   4  -2  206.98    8.70
   4  -4   2  243.38   10.30
  -4  -4  -2  229.68   10.40
  -4  -4  -2  216.68    8.00
   4   4  -2  205.68    9.70
   4  -4   2  223.08    7.60
  -4   4   2  213.38    8.60
  -4  -4   2  204.68    9.50
   4  -4  -2  201.48    9.60
   4   4   2  235.68    9.50
  -4   4  -2  205.88   10.00
   4   4   2  244.18    8.20
   4   4   2  238.18   10.70
  -4   4  -2  206.38    7.50
   4   4   2  246.08    9.80
   4  -4  -2  206.28    9.50
  -4   4  -2  222.48   10.00
  -4  -4   2  204.28    9.90
   4  -4  -2  208.08    9.70
  -4  -4   2  221.58    8.80
   4  -4  -2  203.88    8.40
  -4   4  -2  222.18    6.80
   4  -4  -2  202.28    8.00
  -4  -6  -2 1174.28   37.10
  -4  -6  -2 1218.78   34.10
  -4   6   2 1174.18   39.10
   4   6  -2 1260.77   36.70
  -4   6   2 1144.09   35.90
  -4  -6  -2 1208.08   38.00
   4  -6   2 1252.27   39.70
   4  -6   2 1227.48   34.70
   4   6  -2 1266.97   39.40
   4   6   2 1215.98   37.50
   4  -6  -2 1179.08   36.10
  -4  -6   2 1193.68   36.30
   4  -6  -2 1180.88   38.70
  -4   6  -2 1257.07   35.00
   4   6   2 1213.18   34.10
  -4  -6   2 1221.78   39.30
   4   6   2 1220.98   39.70
   4  -6  -2 1187.78   38.40
   4   6   2 1129.19   37.60
   4  -6  -2 1222.18   34.60
  -4   6  -2 1312.37   40.00
   4  -6  -2 1198.68   34.30
  -4  -8  -2 1605.24   50.69
   4  -8   2 1529.55   45.80
  -4  -8  -2 1553.54   43.60
   4  -8   2 1613.44   52.09
   4   8  -2 1604.54   48.10
  -4   8   2 1649.83   52.69
  -4   8   2 1596.64   47.50
   4   8  -2 1612.14   52.29
   4  -8  -2 1572.94   44.30
  -4   8  -2 1548.25   51.89
  -4  -8   2 1672.63   52.39
   4   8   2 1626.44   49.10
   4  -8  -2 1570.74   44.10
   4   8   2 1660.73   53.49
  -4   8  -2 1571.24   46.10
   4  -8  -2 1538.05   47.50
   4   8   2 1656.53   43.80
   4  -8  -2 1583.04   50.89
  -4  -8   2 1528.05   47.60
   4  10  -2  278.17   13.90
  -4  10   2  299.27   13.90
   4  10  -2  284.17   17.40
   4 -10   2  286.87   12.60
  -4 -10  -2  297.47   16.80
   4 -10   2  314.57   17.90
  -4  10   2  284.67   17.50
  -4 -10   2  293.07   17.30
   4  10   2  286.17   14.70
   4  10   2  288.17   17.90
  -4  10  -2  302.27   18.00
   4 -10  -2  272.57    9.90
  -4  10  -2  304.47   12.80
   4 -10  -2  297.17   17.00
   4 -10  -2  273.57    9.20
  -4  12   2  194.48   16.20
   4 -12   2  258.17   17.60
   4  12  -2  270.97   14.70
  -4 -12  -2  257.87   17.00
   4  12  -2  267.47   18.40
  -4  12   2  239.28   13.10
  -4 -12   2  269.27   18.00
   4 -12  -2  235.18   16.70
  -4  12  -2  252.97   12.20
   4  12   2  241.48   17.70
  -4  12  -2  237.78   17.50
   4  12   2  251.97   14.20
   4  14  -2   90.09   14.20
  -4 -14  -2  116.99   12.10
   4  14  -2  105.19    8.90
  -4  14   2   82.49   13.10
   4 -14   2   90.99   11.70
  -4  14   2   98.19    8.80
  -4 -14   2  114.99   12.40
   4  14   2  100.09    9.60
  -4  14  -2  112.79   13.20
   4 -14  -2   82.39   10.80
   4  14   2   94.19   12.20
  -4  14  -2   95.99    7.70
   4   0   4  483.95   15.70
   4   0   4  472.45   16.00
   4   0   4  484.15   14.20
   4   0  -4  516.45   15.70
   4   0  -4  531.35   16.20
   4   0  -4  529.25   14.90
  -4   0  -4  517.05   14.30
  -4   0   4  477.45   14.70
  -4   0  -4  536.85   16.40
  -4   0   4  481.45   16.00
   4   0  -4  547.25   16.40
  -4   0   4  481.95   15.90
   4   0   4  479.25   16.00
  -4   0   4  475.95   15.50
  -4   0  -4  511.55   15.80
  -4   0  -4  512.85   16.10
   4   0  -4  517.45   16.20
   4   2  -4 1208.98   35.60
  -4  -2  -4 1302.17   36.40
  -4  -2  -4 1310.17   36.20
  -4  -2  -4 1346.87   34.00
   4   2  -4 1218.58   34.90
   4  -2   4 1258.97   35.20
  -4  -2  -4 1293.07   38.80
  -4  -2  -4 1368.06   35.40
   4  -2   4 1238.38   36.00
  -4   2   4 1217.48   36.10
  -4   2   4 1226.58   36.10
   4  -2   4 1241.48   36.10
  -4   2   4 1219.28   35.40
   4   2  -4 1221.98   35.30
   4   2  -4 1176.58   36.10
   4   2   4 1292.57   36.10
  -4  -2   4 1159.38   35.00
   4  -2  -4 1229.78   35.90
  -4  -2   4 1199.18   35.00
  -4  -2   4 1184.28   36.30
  -4   2  -4 1279.97   36.00
   4  -2  -4 1266.47   36.10
   4  -2  -4 1290.57   36.10
  -4   2  -4 1309.17   34.90
  -4  -2   4 1187.78   35.50
   4  -2  -4 1213.38   36.00
  -4   2  -4 1285.67   35.30
   4  -2  -4 1213.28   35.40
  -4   2  -4 1307.37   36.50
  -4   2  -4 1299.97   34.90
   4   2   4 1257.47   36.90
   4   2   4 1334.37   36.70
  -4  -4  -4  456.35   18.20
  -4  -4  -4  466.55   17.20
  -4  -4  -4  485.05   18.50
   4   4  -4  484.15   14.40
   4  -4   4  444.36   14.90
   4   4  -4  501.85   17.50
  -4  -4  -4  466.15   16.10
  -4   4   4  511.05   17.20
  -4   4   4  511.15   16.70
  -4  -4  -4  477.05   16.30
   4  -4   4  471.95   18.00
   4   4  -4  473.15   17.80
  -4  -4  -4  488.95   16.10
   4   4  -4  491.45   16.40
  -4   4   4  491.05   16.90
  -4   4   4  495.85   18.00
   4  -4   4  458.05   14.60
  -4  -4   4  490.35   17.20
   4   4   4  506.05   16.50
   4  -4  -4  505.55   17.20
  -4   4  -4  455.65   14.60
   4   4   4  468.75   17.40
   4  -4  -4  486.85   16.70
  -4  -4   4  464.35   16.20
   4  -4  -4  473.25   17.70
  -4  -4   4  502.85   14.50
  -4  -4   4  476.75   18.10
  -4   4  -4  464.45   17.70
   4  -4  -4  485.25   16.40
   4  -4  -4  500.25   17.20
  -4   4  -4  463.75   15.00
   4  -6   4 1472.75   43.40
  -4   6   4 1572.14   48.80
  -4   6   4 1555.14   46.10
  -4  -6  -4 1550.74   46.80
   4   6  -4 1565.44   45.50
  -4  -6  -4 1588.84   46.50
  -4  -6  -4 1515.75   44.40
   4  -6   4 1615.44   49.20
   4  -6   4 1566.94   41.30
  -4   6   4 1556.04   44.80
  -4  -6  -4 1530.45   46.90
   4   6  -4 1585.84   48.30
  -4  -6   4 1555.24   48.80
   4  -6  -4 1534.85   44.60
   4   6   4 1548.15   49.10
   4  -6  -4 1542.35   45.90
   4   6   4 1499.45   46.90
  -4   6  -4 1629.24   43.90
   4   6   4 1551.74   44.60
  -4  -6   4 1522.15   46.90
   4  -6  -4 1505.75   47.30
   4  -6  -4 1528.05   47.10
  -4   6  -4 1565.84   48.70
   4   8  -4   89.79    6.60
  -4  -8  -4   88.29    7.40
   4   8  -4   78.49    7.80
   4  -8   4   98.59    5.80
  -4  -8  -4   88.99    5.60
   4  -8   4   96.19    8.70
  -4   8   4   85.09    6.70
   4  -8  -4  100.39    6.10
   4   8   4   84.09    7.30
  -4  -8   4   94.39    6.70
   4  -8  -4   93.79    5.80
  -4   8  -4   95.49    5.80
  -4   8  -4   94.79   10.00
   4   8   4   94.09    5.80
   4   8   4  101.99    9.30
  -4  -8   4   89.49    8.50
   4  -8  -4   83.09    7.60
   4  10  -4  177.78   10.50
  -4 -10  -4  200.98   13.00
   4 -10   4  171.68    9.00
  -4  10   4  186.08   14.10
   4  10  -4  175.68   13.40
  -4  10   4  195.28   11.40
  -4 -10  -4  170.08    8.00
   4 -10   4  195.78   14.10
  -4 -10  -4  179.18    8.40
   4 -10  -4  178.08    8.60
  -4  10  -4  177.08   13.40
  -4 -10   4  183.28   13.70
  -4  10  -4  183.38    9.30
   4 -10  -4  168.08    8.30
   4 -10  -4  180.78   12.80
   4  10   4  217.78   12.60
   4  10   4  201.68   14.60
  -4  12   4  225.88   17.40
   4 -12   4  239.78   17.40
  -4 -12  -4  231.88   16.00
   4  12  -4  245.68   17.70
  -4  12   4  236.88   13.60
  -4  12  -4  230.78   11.20
  -4  12  -4  200.38   16.30
   4  12   4  244.78   14.50
   4  12   4  223.88   17.30
  -4 -12   4  266.57   18.20
   4 -12  -4  212.88    7.90
   4 -12  -4  234.88   16.50
  -4  14   4   54.39   11.10
   4  14  -4   62.79   11.00
  -4  14   4   56.19    7.40
   4  14  -4   64.39    7.30
  -4 -14  -4   58.09   10.30
   4 -14   4   47.80    9.90
  -4 -14  -4   49.00   10.60
   4 -14  -4   75.59   10.10
  -4  14  -4   68.59   11.70
   4  14   4   52.29    8.40
   4  14   4   42.50    9.30
  -4 -14   4   59.79   11.00
  -4   0   6    0.70    1.10
   4   0  -6    1.10    0.80
  -4   0   6    0.60    0.80
  -4   0  -6    1.20    0.70
  -4   0  -6    0.20    1.00
   4   0   6    2.00    1.20
   4   0   6    1.90    0.80
   4   0  -6    1.10    1.20
   4   0   6    2.40    1.30
   4   0   6    1.50    1.00
  -4   0  -6    3.10    1.30
  -4   0   6    1.70    0.90
   4   0  -6    2.10    1.30
   4   0  -6    0.90    0.80
  -4   0  -6    2.10    1.10
   4   0  -6    1.80    1.20
   4  -2   6 1025.20   31.70
  -4  -2  -6  982.20   30.90
   4  -2   6 1014.70   30.10
  -4   2   6 1009.70   31.10
  -4  -2  -6 1012.40   31.60
   4   2  -6  949.31   30.50
  -4   2   6  984.50   31.00
  -4  -2  -6  992.50   27.60
   4   2  -6 1032.60   30.70
   4  -2   6  997.60   30.60
  -4  -2  -6  987.00   30.80
   4   2  -6 1020.30   29.70
   4   2  -6 1014.30   30.00
  -4   2   6 1042.70   29.60
  -4  -2   6 1013.20   29.50
   4  -2  -6 1008.70   30.90
  -4   2  -6 1041.60   31.40
   4   2   6 1010.70   31.20
  -4   2  -6 1006.20   30.10
   4  -2  -6  961.10   30.70
   4   2   6 1004.50   31.10
  -4   2  -6 1036.70   30.90
  -4   2  -6 1059.19   30.00
   4  -2  -6  992.10   29.60
   4  -2  -6  976.10   30.40
   4   2   6  989.90   27.50
  -4   2  -6  996.40   30.10
  -4  -2   6  982.00   30.30
  -4  -2   6  979.90   30.00
  -4  -2   6  962.40   30.60
   4   2   6  968.40   31.20
  -4  -4  -6  240.28   12.10
  -4  -4  -6  241.48    9.20
  -4  -4  -6  248.88   12.10
   4  -4   6  220.68    9.20
   4  -4   6  228.38   10.90
   4   4  -6  210.88   10.30
   4   4  -6  227.48    9.00
  -4   4   6  245.18   11.00
  -4  -4  -6  232.48    9.20
   4   4  -6  193.58   10.70
  -4   4   6  224.28   10.60
   4   4  -6  221.38   10.00
   4  -4   6  238.08   11.40
  -4  -4  -6  244.18   10.70
  -4   4   6  232.88   10.10
  -4  -4  -6  217.08   10.70
   4   4   6  250.47   11.40
  -4  -4   6  220.08   10.20
  -4   4  -6  224.78    9.10
  -4  -4   6  232.38   11.50
  -4   4  -6  207.58   10.70
   4  -4  -6  234.28   11.40
  -4  -4   6  234.18    9.10
  -4   4  -6  207.18    9.00
  -4   4  -6  218.98   11.00
   4   4   6  252.07   10.90
   4  -4  -6  242.88   10.30
   4  -4  -6  218.38   11.00
  -4  -4   6  217.48    9.90
   4  -4  -6  218.78   10.50
   4  -4  -6  223.98   10.40
   4  -6   6   29.20    5.10
   4   6  -6   29.60    3.60
   4   6  -6   19.40    2.10
  -4   6   6   24.30    4.10
  -4  -6  -6   17.40    4.40
   4   6  -6   22.10    2.10
  -4  -6  -6   19.40    3.40
   4   6  -6   21.80    4.30
  -4  -6  -6   26.40    4.10
  -4  -6  -6   21.00    4.00
   4  -6   6   23.90    2.80
  -4   6   6   20.60    4.40
  -4   6   6   27.80    4.50
   4  -6   6   27.80    2.50
   4   6   6   20.80    3.60
   4  -6  -6   19.60    3.70
  -4  -6   6   23.40    3.50
   4  -6  -6   16.20    3.00
   4  -6  -6   19.40    3.80
  -4   6  -6   26.00    2.40
   4   6   6   21.40    4.00
  -4   6  -6   30.40    3.10
  -4   6  -6   29.80    5.40
  -4  -6   6   29.20    5.20
  -4   8   6  401.16   19.80
   4   8  -6  384.16   16.10
  -4   8   6  381.56   16.00
   4  -8   6  353.46   15.00
  -4  -8  -6  385.96   17.10
  -4  -8  -6  392.46   20.20
   4  -8   6  368.46   19.30
  -4   8   6  375.36   17.10
  -4  -8  -6  367.76   15.40
   4   8   6  384.56   18.00
  -4   8  -6  378.36   14.60
   4   8   6  395.76   15.90
  -4   8  -6  382.26   19.10
   4  -8  -6  396.36   18.00
  -4  -8   6  418.46   20.20
  -4 -10  -6  174.98   12.40
   4 -10   6  235.68   16.10
   4 -10   6  192.58   10.10
   4  10  -6  227.08   12.10
  -4 -10  -6  236.28   16.50
  -4  10   6  235.28   16.10
  -4  10   6  222.48   13.10
   4  10  -6  225.38   15.30
  -4 -10  -6  237.58   14.20
  -4  10  -6  223.78   15.50
  -4  10  -6  219.88   10.50
   4  10   6  232.48   11.10
   4  10   6  223.48   13.90
   4 -10  -6  235.18   11.60
   4 -10  -6  236.58   14.40
  -4 -10   6  221.18   15.60
  -4 -12  -6  188.28   13.60
  -4  12   6  169.58   27.10
   4  12  -6  176.98   14.00
   4  12  -6  153.28   14.10
   4 -12   6  154.08   14.40
  -4 -12  -6  176.98   15.80
  -4 -12  -6  172.68    8.90
  -4  12   6  154.58   11.50
  -4 -12   6  166.88   14.90
  -4  12  -6  182.88    9.50
   4  12   6  166.88   12.80
   4 -12  -6  164.98    9.00
   4 -12  -6  179.18   13.80
   4  14  -6   76.49    8.20
  -4  14   6   69.89    8.70
   4  14  -6   75.69   12.10
  -4 -14  -6   72.79   13.10
  -4 -14  -6   70.79    9.70
   4 -14   6   83.19   11.30
  -4 -14   6   75.89   12.80
   4 -14  -6   76.59   10.40
   4  14   6   83.59   12.60
  -4  14  -6   54.39   10.50
   4 -14  -6   61.29   11.80
   4   0   8 5907.91  155.78
  -4   0  -8 5547.65  152.38
   4   0  -8 5859.41  155.88
   4   0  -8 5650.73  154.08
  -4   0  -8 5866.61  155.58
   4   0   8 5728.53  155.38
  -4   0  -8 5718.63  155.78
   4   0  -8 5958.10  156.08
  -4   0  -8 5704.13  155.48
   4   0   8 5867.61  152.58
  -4   0   8 6055.59  154.08
  -4  -2  -8  259.07   12.10
   4   2  -8  249.68   11.30
  -4   2   8  230.28   11.50
   4   2  -8  237.98   10.90
   4  -2   8  242.18   11.20
  -4  -2  -8  259.37    8.70
   4   2  -8  245.38   10.30
  -4   2   8  216.38   10.50
  -4   2   8  232.78   10.00
  -4  -2  -8  256.17   11.80
   4  -2   8  266.27   11.40
   4  -2   8  262.87   10.80
  -4  -2  -8  257.57   11.80
  -4   2   8  239.68   11.80
   4   2   8  247.88    8.50
   4  -2  -8  240.18   10.10
  -4   2  -8  271.67   11.50
   4  -2  -8  253.17   12.00
   4   2   8  247.28   11.70
   4  -2  -8  249.97   11.10
  -4  -2   8  232.98   11.00
  -4   2  -8  278.67   11.90
   4   2   8  234.38   11.60
  -4   2  -8  260.07   10.70
  -4  -2   8  222.48   10.00
   4  -2  -8  248.78   11.20
   4  -2  -8  239.58   11.60
   4   2   8  241.98   11.70
  -4   2  -8  271.57   11.30
  -4  -2   8  232.98   11.10
  -4  -2   8  235.28   11.00
   4  -4   8  286.97   13.20
  -4   4   8  288.97   13.40
   4  -4   8  284.17   11.60
  -4   4   8  273.47   13.10
   4   4  -8  248.58   11.10
  -4  -4  -8  289.17   10.40
  -4   4   8  276.47   11.60
   4   4  -8  244.48   11.90
  -4  -4  -8  290.47   14.10
   4   4  -8  249.38   11.90
  -4  -4  -8  275.47   10.40
  -4   4  -8  249.58   12.50
  -4  -4   8  253.87   12.90
   4  -4  -8  249.58   11.30
   4   4   8  311.07   13.90
   4  -4  -8  256.17   12.90
  -4  -4   8  265.87   11.90
   4   4   8  294.57   13.40
  -4   4  -8  273.27   11.40
  -4  -4   8  256.37   11.30
  -4   4  -8  267.47   12.60
  -4   4  -8  265.37   12.90
  -4   4  -8  259.07   12.50
   4  -4  -8  235.58   12.30
  -4  -4   8  258.27   11.90
   4   6  -8  795.22   27.30
  -4  -6  -8  816.12   26.30
  -4  -6  -8  794.42   27.00
  -4   6   8  805.92   28.40
   4   6  -8  779.02   28.90
  -4   6   8  787.92   28.80
   4   6  -8  791.12   24.90
  -4  -6  -8  836.42   31.20
   4  -6   8  736.73   25.70
   4  -6   8  803.42   25.20
   4  -6   8  818.92   30.30
  -4   6  -8  764.62   24.90
   4  -6  -8  769.02   27.50
   4   6   8  825.92   28.40
  -4   6  -8  805.52   26.00
  -4  -6   8  856.61   30.90
   4  -6  -8  773.82   30.00
  -4  -6   8  829.82   25.10
  -4   6  -8  796.12   29.70
   4  -6  -8  790.62   27.60
   4   6   8  814.92   29.70
   4   8  -8  456.55   21.50
  -4  -8  -8  456.75   19.20
   4  -8   8  450.35   14.80
   4   8  -8  433.36   13.80
   4   8  -8  471.55   18.90
   4   8  -8  434.66   13.80
   4  -8   8  469.75   22.60
  -4   8   8  496.75   21.50
  -4  -8  -8  482.35   23.40
  -4   8   8  505.65   20.20
   4  -8   8  428.96   17.10
   4  -8  -8  522.85   23.90
   4  -8  -8  501.05   20.60
   4   8   8  489.75   19.80
   4   8   8  463.65   21.30
  -4   8  -8  412.66   21.20
  -4  -8   8  477.35   22.90
  -4   8  -8  437.16   14.60
  -4   8  -8  453.75   17.50
  -4 -10  -8  106.99    9.10
  -4 -10  -8  124.29   12.30
  -4  10   8  110.89    9.70
   4 -10   8  104.39   10.80
   4  10  -8  128.29    8.70
   4  10  -8  126.19   11.40
  -4  10  -8  112.39   10.90
   4  10   8   88.39    9.10
   4 -10  -8  121.99    9.10
  -4  10  -8  112.79    7.40
   4 -10  -8  108.09    9.70
   4 -10  -8  129.59   12.40
   4  10   8  100.29    8.00
  -4 -10   8   98.99   10.70
   4 -12   8  107.49   12.10
  -4  12   8   99.39    9.70
  -4 -12  -8   94.59    7.90
   4  12  -8  109.89    8.80
  -4 -12  -8  102.89   12.70
   4  12  -8  106.99   13.30
  -4 -12  -8  113.49   10.50
   4 -12  -8  100.29    8.30
   4 -12  -8  104.59   12.70
   4  12   8  109.49   10.50
  -4  12  -8  102.19   11.60
  -4 -12   8  108.89   12.20
   4 -12  -8  121.79   11.50
  -4  12  -8  114.49    7.40
   4   0  10    0.10    0.80
   4   0 -10    1.80    1.30
  -4   0 -10    1.40    1.40
   4   0 -10    1.50    1.20
  -4   0  10    3.00    1.50
   4   0 -10   -0.30    0.90
   4   0  10   -0.80    1.20
  -4   0  10    0.40    1.30
  -4   0 -10    0.80    1.30
  -4   0  10   -0.30    0.90
   4   0  10    1.20    1.50
  -4   0 -10    3.10    1.20
   4   2 -10 1226.28   40.80
  -4   2  10 1298.87   40.90
  -4  -2 -10 1371.26   42.90
  -4   2  10 1382.66   43.20
  -4   2  10 1391.96   39.60
   4  -2  10 1326.77   40.20
   4   2 -10 1311.27   40.10
   4  -2  10 1313.67   41.70
  -4  -2 -10 1297.87   37.20
   4   2 -10 1335.27   42.00
   4  -2  10 1273.47   41.40
   4   2  10 1368.76   37.20
   4  -2 -10 1275.17   39.30
   4   2  10 1353.96   43.00
  -4  -2  10 1326.67   41.80
   4   2  10 1339.67   42.70
  -4   2 -10 1347.37   41.60
  -4   2 -10 1332.27   41.80
   4  -2 -10 1367.46   41.40
  -4  -2  10 1345.77   41.40
   4  -2 -10 1341.57   43.10
   4  -4  10  270.47   12.50
  -4   4  10  258.97   13.80
   4   4 -10  236.38   12.20
  -4  -4 -10  248.48    9.80
  -4   4  10  253.07   11.40
   4  -4  10  257.87   13.00
   4   4 -10  242.28   12.50
  -4   4  10  268.07   14.00
  -4  -4 -10  269.07   10.00
  -4  -4 -10  271.17   14.50
  -4  -4  10  240.88   12.00
  -4   4 -10  269.97   13.60
  -4   4 -10  263.77   12.30
   4   4  10  271.17   14.10
   4  -4 -10  261.27   13.00
   4   4  10  277.27   14.00
  -4  -4  10  221.88   11.70
   4  -4 -10  282.77   13.90
  -4  -4  10  231.08   13.00
  -4   6  10  501.95   21.70
   4   6 -10  507.85   20.40
  -4   6  10  499.55   22.20
  -4  -6 -10  506.05   18.30
  -4  -6 -10  510.95   18.60
   4  -6  10  509.35   18.80
   4   6 -10  492.65   18.60
   4   6 -10  533.95   21.90
   4  -6  10  518.95   25.50
  -4  -6 -10  499.85   23.40
   4   6  10  482.15   22.10
  -4  -6  10  506.25   22.80
  -4  -6  10  520.45   19.00
  -4   6 -10  513.75   19.10
   4  -6 -10  525.75   23.10
   4  -6 -10  486.55   26.20
   4   6  10  495.75   21.50
   4  -6 -10  507.85   19.90
  -4   6 -10  549.45   19.80
  -4   6 -10  544.05   22.90
   4  -8  10  148.99    7.60
   4  -8  10  149.29   12.20
   4   8 -10  151.28    7.40
  -4   8  10  176.88   11.50
   4   8 -10  163.28   11.70
  -4  -8 -10  154.48    9.40
  -4   8  10  154.18   11.40
   4   8 -10  149.99    7.30
  -4  -8 -10  132.39   11.80
   4   8 -10  164.98   10.20
   4  -8 -10  143.19   12.00
  -4  -8  10  144.59   12.00
   4   8  10  127.19   11.00
  -4   8 -10  159.78    9.10
  -4   8 -10  142.79    7.50
  -4   8 -10  135.49   11.40
   4  -8 -10  148.19   10.10
   4   8  10  134.09   10.30
   4  10 -10   28.70    6.90
  -4  10  10   34.30    6.80
   4 -10  10   40.30    8.50
  -4 -10 -10   25.60    5.20
   4  10 -10   40.80    5.40
  -4  10  10   44.40    7.00
  -4 -10 -10   29.00    7.20
  -4  10 -10   28.70    4.60
   4 -10 -10   33.30    6.30
   4  10  10   45.30    6.00
  -4  10 -10   27.80    6.60
  -4 -10  10   53.89    9.90
   4  10  10   28.10    6.30
   4 -10 -10   41.50    8.70
  -4 -12 -10  262.97   20.20
   4 -12  10  263.87   19.60
   4  12 -10  249.68   14.20
  -4  12  10  269.07   17.10
   4  12 -10  225.18   17.70
  -4 -12 -10  255.97   15.90
   4 -12 -10  242.38   19.30
   4 -12 -10  237.58   14.80
   4  12  10  271.07   14.80
  -4  12 -10  248.48   18.70
   4  12  10  261.97   20.50
  -4 -12  10  269.47   20.10
  -4  12 -10  269.17   12.60
   4 -12 -10  266.57   16.70
  -4   0 -12  105.59    8.40
  -4   0  12  122.29    7.70
   4   0 -12  136.89    9.50
   4   0  12   86.09    7.90
  -4   0  12  117.59    7.40
  -4   0 -12   90.69    5.90
  -4   0 -12  101.19    8.00
   4   0 -12  126.39    7.80
  -4   0  12  122.49    9.10
   4   0 -12  115.39    7.30
   4   0  12   94.59    5.90
  -4  -2 -12   33.00    5.50
   4   2 -12   37.10    6.00
   4   2 -12   26.70    4.30
  -4   2  12   23.90    8.40
  -4   2  12   23.70    3.80
   4  -2  12   27.00    3.60
  -4  -2 -12   30.40    2.70
   4  -2  12   35.60    5.70
   4  -2 -12   25.00    7.90
   4   2  12   35.80    9.60
  -4  -2  12   23.60    4.00
   4   2  12   24.50    2.50
   4  -2 -12   28.80    4.90
  -4   2 -12   31.00    4.60
  -4  -2  12   16.30    4.10
  -4   2 -12   41.20    6.00
  -4   2 -12   26.80    5.00
  -4  -2  12   24.50    4.50
   4  -4  12 1125.89   38.10
  -4   4  12 1195.68   40.90
   4   4 -12 1179.18   38.10
  -4  -4 -12 1117.29   40.60
   4   4 -12 1218.38   39.30
   4  -4  12 1154.88   38.70
  -4   4  12 1196.68   36.10
  -4  -4 -12 1116.79   33.30
  -4   4  12 1218.68   41.00
  -4  -4 -12 1067.09   33.10
   4  -4 -12 1161.18   41.00
  -4   4 -12 1157.58   39.30
  -4  -4  12 1140.59   38.10
   4  -4 -12 1096.19   35.80
   4   4  12 1098.49   40.00
   4   4  12 1139.39   40.60
  -4   4 -12 1149.19   38.10
  -4  -4  12 1172.78   39.50
   4  -4 -12 1190.78   39.90
   4   6 -12  456.25   20.50
  -4   6  12  445.16   21.30
   4  -6  12  440.06   18.50
  -4  -6 -12  479.25   23.20
   4   6 -12  470.05   20.40
  -4   6  12  461.55   22.00
   4  -6  12  430.76   21.10
  -4  -6 -12  427.86   16.40
  -4  -6 -12  441.86   16.40
  -4   6 -12  440.46   18.90
  -4  -6  12  496.35   19.10
  -4  -6  12  471.35   22.10
   4  -6 -12  455.45   18.50
   4  -6 -12  467.45   21.90
   4   6  12  434.56   21.10
   4   6  12  446.26   22.00
  -4   6 -12  442.46   21.30
   4   8 -12   43.90    6.90
   4   8 -12   54.69    7.00
   4  -8  12   53.49    9.00
  -4   8  12   31.40    6.10
   4   8 -12   38.80    6.00
   4  -8  12   52.49    5.10
  -4  -8 -12   49.10    9.00
   4   8 -12   44.90    4.80
  -4  -8 -12   53.59    5.30
  -4   8  12   38.50    7.40
  -4  -8  12   36.00    7.20
  -4   8 -12   52.69    5.60
   4   8  12   48.70    6.80
   4   8  12   60.59    8.00
   4  -8 -12   43.10    5.60
  -4  -8  12   49.40    4.60
  -4   8 -12   59.79    9.30
   4  -8 -12   49.70    8.80
   4  10 -12  145.09   10.50
   4  10 -12  122.79   11.60
  -4  10  12  144.89   12.70
  -4  10  12  128.89   11.00
  -4 -10 -12  131.09   22.40
  -4 -10  12  134.59   13.90
   4  10  12  124.09   12.00
  -4  10 -12  120.19    5.70
   4  10  12  129.59   10.90
   4 -10 -12  140.49   13.60
  -4  10 -12  141.99    9.30
   4 -10 -12  134.39   10.60
  -4  10 -12  146.19   13.00
  -4 -12 -12  326.07   17.80
  -4 -12 -12  323.17   23.00
  -4  12  12  328.17   20.40
   4  12 -12  310.37   16.60
   4  12 -12  321.27   21.30
   4 -12  12  337.07   23.00
   4 -12 -12  308.07   18.30
   4 -12 -12  311.77   22.60
  -4 -12  12  307.07   22.30
   4 -12 -12  307.57   18.50
   4  12  12  311.27   20.50
   4  12  12  325.87   18.00
  -4  12 -12  295.17   20.70
   4   0 -14    1.80    1.50
  -4   0  14    0.70    2.00
   4   0  14   -0.10    2.20
   4   0  14    1.10    1.10
  -4   0  14    2.50    1.90
  -4   0 -14    1.70    1.90
  -4   0 -14    0.30    2.20
  -4   0 -14    2.10    1.40
   4   0 -14   -0.80    1.70
   4  -2  14  251.27   14.60
  -4  -2 -14  236.18    9.70
  -4   2  14  237.98   11.40
   4   2 -14  268.37   13.10
   4  -2  14  249.48   12.30
   4   2 -14  242.78   14.30
  -4   2  14  234.48   14.80
  -4  -2 -14  264.27   14.80
  -4  -2 -14  257.87   15.30
   4   2  14  237.18   14.80
   4  -2 -14  223.08   11.30
  -4  -2  14  248.08   13.30
   4  -2 -14  252.27   15.30
  -4   2 -14  250.27   14.20
   4  -2 -14  237.88   13.10
   4   2  14  240.68    9.70
  -4   2 -14  258.77   14.00
  -4  -2  14  233.08   14.20
   4  -4  14    8.60    3.20
   4  -4  14    4.50    2.40
  -4   4  14    3.50    2.80
  -4   4  14    5.60    2.10
  -4  -4 -14    4.80    1.50
   4   4 -14    7.70    3.50
  -4  -4 -14    8.40    3.80
   4   4 -14   10.40    3.10
  -4  -4 -14    4.50    1.50
   4   4  14    4.90    2.70
   4   4  14    1.60    2.70
  -4  -4  14    9.90    3.80
  -4   4 -14    6.60    2.90
   4  -4 -14    5.80    3.10
  -4  -4  14    8.00    3.10
   4  -4 -14    8.40    2.60
   4  -4 -14    7.40    3.70
  -4   4 -14    4.90    3.00
   4  -6  14   69.69    6.80
  -4   6  14   79.89    9.10
  -4   6  14   76.59    8.70
   4   6 -14   76.29    7.80
  -4  -6 -14   60.79    9.60
  -4  -6 -14   53.79    4.50
   4   6 -14   78.69    7.90
  -4  -6 -14   61.89    4.60
   4  -6  14   83.39    8.70
   4  -6 -14   66.99    8.70
   4  -6 -14   72.59    6.30
   4  -6 -14   85.19    9.20
   4   6  14   76.39    8.90
  -4   6 -14   66.89    7.90
  -4  -6  14   73.79    8.40
  -4   6 -14   74.79    7.40
   4   6  14   57.89    7.80
  -4   8  14   24.40    6.40
  -4  -8 -14   23.40    3.90
  -4   8  14   28.40    6.40
  -4  -8 -14   22.50    6.30
   4   8 -14   18.10    4.90
   4   8 -14   27.30    5.60
   4  -8  14   19.70    6.30
   4  -8  14   20.10    4.10
   4  -8 -14   17.50    5.50
   4  -8 -14   21.80    4.50
  -4  -8  14   18.70    3.80
  -4   8 -14   21.30    4.70
  -4   8 -14   25.30    6.30
   4   8  14   18.80    5.70
  -4  -8  14   10.20    4.70
   4   8  14   19.00    5.40
   4 -10  14   78.79   12.20
  -4 -10 -14   62.19    6.50
   4  10 -14   78.79    8.50
   4  10 -14   66.09   10.00
  -4  10  14   79.59   10.30
  -4 -10 -14   66.89   11.30
  -4  10  14   71.79    8.90
   4 -10 -14   64.99    7.70
  -4  10 -14   64.39   10.60
   4  10  14   78.39   10.30
  -4  10 -14   67.09    7.20
  -4  10 -14   64.79    5.50
  -4 -10  14   79.99   10.40
   4 -10 -14   69.09   10.90
   4  10  14   70.39    9.10
  -4   0  16 1395.56   43.00
  -4   0 -16 1357.56   46.00
   4   0  16 1316.87   40.40
   4   0  16 1262.87   47.30
  -4   0 -16 1203.48   40.20
   4   0 -16 1381.26   44.10
  -4   0  16 1355.76   48.20
  -4   0 -16 1354.56   47.60
   4   0 -16 1484.25   49.20
  -4   2  16   24.70    5.80
   4  -2  16   32.00    5.10
  -4   2  16   36.80    4.30
  -4  -2 -16   36.50    6.70
  -4  -2 -16   26.70    3.10
   4   2 -16   33.40    6.80
   4  -2  16   33.70    6.30
   4   2 -16   31.00    5.30
  -4  -2 -16   31.20    6.50
  -4   2 -16   26.80    5.60
  -4   2 -16   33.40    6.50
   4   2  16   24.50    6.10
   4  -2 -16   27.90    6.10
   4  -2 -16   30.70    5.50
  -4  -2  16   35.90    6.00
  -4  -2  16   30.00    6.40
   4  -4  16   61.89    6.70
  -4  -4 -16   49.10    8.30
  -4   4  16   50.29    5.10
  -4  -4 -16   45.70    3.20
  -4   4  16   64.89    8.30
   4   4 -16   56.89    6.50
   4  -4  16   55.49    8.50
  -4  -4 -16   49.30    8.40
  -4  -4 -16   54.29    3.40
   4   4 -16   55.09    7.30
  -4  -4  16   50.79    6.90
  -4   4 -16   64.89    7.70
   4   4  16   64.59    8.20
   4   4  16   67.19    8.40
   4  -4 -16   47.50    7.30
  -4  -4  16   57.19    7.00
   4  -4 -16   40.80    7.20
  -4   4 -16   55.29    7.30
   4  -4 -16   39.20    7.50
   4   6 -16   98.69    9.70
  -4   6  16   77.89    9.70
   4   6 -16   89.79    8.70
   4  -6  16   87.49    9.20
  -4  -6 -16   87.19    4.60
  -4  -6 -16  104.09   11.10
   4  -6  16   82.49    8.30
   4   6  16   88.49   10.10
  -4  -6  16   81.59    9.50
  -4  -6  16   88.89    8.60
  -4   6 -16   91.29    9.50
   4  -6 -16   88.59   10.50
   4  -6 -16   75.79    9.30
   4  -6 -16   83.49    6.80
  -4   6 -16   86.99    8.60
   4   6  16   82.49    9.90
   4   8 -16  124.89   10.60
   4  -8  16   97.59    8.60
  -4   8  16  116.29   12.00
   4   8 -16  118.89   10.40
   4  -8  16  108.79   11.40
   4  -8 -16  120.89    8.80
  -4   8 -16  104.59    9.40
  -4   8 -16  113.39   11.30
   4  -8 -16  139.89   13.30
   4  -8 -16  113.29   12.70
   4   8  16  104.49   12.70
  -4  -8  16  108.39    8.90
   4   8  16  106.29   11.90
   4 -10  16    8.20    5.70
   4  10 -16    3.00    3.90
   4  10 -16    8.70    4.40
  -4 -10 -16   14.10    5.90
  -4  10  16    9.00    4.10
   4 -10 -16    8.90    4.10
   4 -10 -16    7.80    5.40
   4  10  16    5.80    4.20
   4  10  16   11.60    5.00
  -4  10 -16    9.60    4.70
  -4 -10  16    7.30    5.10
   4 -10 -16   15.50    5.80
  -4  10 -16    4.30    4.30
  -4   0 -18   -1.60    2.50
   4   0 -18    3.20    2.80
  -4   0 -18    3.50    2.90
  -4   0  18    2.60    3.00
   4   0  18    5.70    3.40
  -4   0  18    0.80    2.00
   4   0 -18   -1.10    1.60
   4   0  18    3.00    1.70
  -4   2  18  476.45   25.10
   4  -2  18  465.05   19.80
  -4   2  18  476.05   18.60
   4  -2  18  477.45   24.40
  -4  -2 -18  496.65   25.60
   4   2 -18  447.86   20.90
   4   2 -18  483.15   24.30
  -4  -2 -18  458.25   23.10
  -4  -2  18  479.35   24.30
  -4  -2  18  461.35   21.10
   4  -2 -18  460.95   21.60
  -4   2 -18  495.95   24.20
   4   2  18  477.05   15.70
  -4   2 -18  462.95   22.50
   4   2  18  462.65   25.00
   4  -2 -18  500.15   25.80
  -4   4  18   40.60    4.70
   4  -4  18   48.20    8.50
   4   4 -18   48.70    7.50
   4  -4  18   48.70    6.60
  -4   4  18   42.70    8.50
  -4  -4 -18   53.99    9.30
  -4  -4 -18   45.90    9.10
   4   4 -18   45.10    8.10
  -4   4 -18   50.09    7.90
   4  -4 -18   49.80    7.90
  -4   4 -18   42.30    7.30
   4   4  18   50.99    9.30
  -4  -4  18   46.90    7.60
  -4  -4  18   42.20    8.00
   4  -4 -18   34.80    7.80
   4   6 -18   43.10    7.70
  -4  -6 -18   41.70    8.40
   4  -6  18   56.89    7.30
  -4  -6 -18   32.40    8.30
  -4   6  18   56.59    9.70
   4   6 -18   44.10    7.20
   4  -6  18   59.99    8.10
   4  -6 -18   47.40    5.10
   4   6  18   44.20    8.60
   4  -6 -18   48.10    9.40
  -4   6 -18   44.90    7.90
   4  -6 -18   33.00    6.90
  -4   6 -18   36.70    7.10
  -4  -6  18   52.49    7.20
  -4  -6  18   51.99    8.70
   4  -8  18   43.00    6.80
  -4   8  18   54.99   10.00
   4  -8  18   53.99    9.60
  -4  -8 -18   48.40   10.10
  -4  -8 -18   61.59   11.40
   4   8 -18   48.20    8.40
   4   8 -18   49.90   12.40
   4  -8 -18   44.40    9.10
  -4   8 -18   60.39    9.20
   4  -8 -18   41.90    9.00
  -4  -8  18   39.20    8.30
   4   8  18   46.10    9.00
   4   8  18   55.29    9.90
  -4  -8  18   49.40    6.70
  -4   8 -18   41.90    7.30
  -4   0  20  199.58   11.90
   4   0  20  190.98    9.60
  -4   0  20  200.78   16.20
   4   0 -20  192.68   12.70
  -4   0 -20  179.88   15.10
   4   0 -20  175.28   15.10
   4   0  20  189.18   16.00
  -4   0 -20  188.18   14.00
  -4   2  20   18.50    5.80
   4  -2  20   27.40    6.80
   4   2 -20   24.20    7.10
  -4  -2 -20   32.40    8.10
   4  -2  20   25.30    5.20
   4   2 -20   25.20    5.50
  -4   2  20   23.00    4.30
  -4  -2 -20   28.80    6.40
  -4   2 -20   23.10    6.30
  -4   2 -20   23.70    5.80
   4   2  20   27.30    7.20
  -4  -2  20   24.80    5.30
  -4  -2  20   17.00    5.40
   4  -2 -20   27.60    5.70
   4  -2 -20   20.70    6.70
  -4  -4 -20   47.40    7.90
   4  -4  20   44.10    7.10
   4   4 -20   48.80    7.90
   4  -4  20   52.49    8.90
   4   4 -20   63.79   10.70
  -4  -4 -20   45.40    9.00
  -4   4  20   49.00    9.30
   4   4  20   64.69   11.60
   4  -4 -20   51.19   10.60
  -4   4 -20   56.59    8.60
   4  -4 -20   47.20    8.30
  -4   4 -20   67.19   10.20
  -4  -4  20   62.99    9.50
  -4  -4  20   54.09    9.70
   4  -6  20  111.89   11.10
  -4   6  20  108.99   12.70
   4  -6  20  115.39   11.50
   4   6  20  121.49   13.10
  -4  -6  20  106.79   10.60
   5  -1   1  913.61   26.00
  -5  -1  -1  916.51   26.40
   5  -1   1  946.71   24.50
  -5   1   1  970.10   26.20
  -5   1   1 1011.40   25.80
  -5  -1  -1  932.11   26.20
   5   1  -1  926.01   26.00
  -5  -1  -1  892.71   25.20
   5  -1   1  908.41   26.10
   5  -1   1  909.21   25.60
  -5   1   1  983.30   25.90
   5   1  -1  919.51   25.40
   5  -1   1  925.11   26.00
   5   1  -1  914.81   26.10
   5   1  -1  951.50   25.50
  -5  -1   1  981.80   26.30
   5  -1  -1  964.70   25.90
   5   1   1  905.21   26.30
  -5  -1   1  981.80   26.10
   5  -1  -1  975.40   25.70
   5  -1  -1  968.30   25.50
   5  -1  -1  958.70   26.20
   5  -1  -1  948.01   25.90
  -5   1  -1  896.01   26.10
  -5   1  -1  924.91   26.10
  -5  -1   1  969.40   25.50
   5   1   1  889.21   26.10
   5  -1  -1  979.70   25.50
   5   1   1  900.51   25.20
   5   1   1  935.51   25.80
  -5  -1   1  960.40   25.50
  -5   3   1 2420.86   66.39
   5  -3   1 2511.95   70.39
   5  -3   1 2490.15   65.59
  -5  -3  -1 2526.85   66.29
  -5  -3  -1 2530.45   67.89
  -5   3   1 2488.55   68.59
   5   3  -1 2531.05   67.69
   5  -3   1 2546.55   68.79
   5   3  -1 2585.94   68.59
   5   3  -1 2504.65   68.49
  -5  -3  -1 2538.55   68.99
   5   3  -1 2549.94   65.19
  -5  -3  -1 2404.36   67.89
   5  -3   1 2471.05   65.89
  -5  -3   1 2504.25   67.69
  -5   3  -1 2587.14   70.69
  -5  -3   1 2474.65   65.19
   5  -3  -1 2511.55   68.49
   5  -3  -1 2524.35   66.49
  -5  -3   1 2460.85   68.19
   5   3   1 2452.95   68.09
  -5   3  -1 2519.85   65.69
   5   3   1 2502.65   67.79
   5  -3  -1 2545.35   68.79
   5   3   1 2445.16   68.99
   5  -3  -1 2459.95   66.49
  -5  -3   1 2451.75   68.49
   5  -3  -1 2487.45   66.49
  -5   3  -1 2535.35   68.79
   5   3   1 2484.35   66.19
  -5   3  -1 2583.64   66.89
   5  -3  -1 2477.65   68.49
   5  -5   1 2241.18   55.99
   5  -5   1 2163.98   61.39
  -5  -5  -1 2151.58   60.49
   5  -5   1 2177.38   55.89
  -5  -5  -1 2084.29   56.39
   5  -5   1 2100.39   61.19
  -5   5   1 2092.79   61.29
   5  -5   1 2147.59   57.19
  -5   5   1 2101.79   57.99
  -5  -5  -1 2075.49   59.59
   5   5  -1 1971.90   60.39
   5   5  -1 2112.79   59.29
  -5  -5  -1 2108.49   61.29
   5   5  -1 2037.70   60.99
   5  -5  -1 2162.68   56.99
   5   5   1 2199.08   59.99
  -5   5  -1 2092.09   61.29
   5  -5  -1 2105.69   61.29
   5  -5  -1 2086.89   56.89
  -5  -5   1 2017.00   58.99
   5   5   1 2128.69   60.29
  -5   5  -1 2102.19   57.29
  -5   5  -1 2014.90   60.89
   5  -5  -1 2108.29   61.29
   5   5   1 2139.59   61.69
   5  -5  -1 2139.59   60.99
  -5  -5   1 2102.99   60.99
   5   5   1 2237.18   56.49
  -5  -5   1 2046.30   60.69
   5  -5  -1 2117.89   58.09
   5   7  -1  112.39    8.60
  -5   7   1  108.39    8.50
  -5   7   1  115.39    6.50
  -5  -7  -1  101.59    7.10
  -5  -7  -1  114.69    8.20
   5   7  -1  122.39    7.40
  -5  -7  -1  109.69    4.40
   5  -7   1  111.49    8.50
   5  -7   1  103.29    5.90
   5   7   1  110.09    4.30
  -5  -7   1  111.19    7.10
   5  -7  -1  110.09    6.40
   5   7   1  119.69    8.90
   5  -7  -1  108.79    8.20
  -5   7  -1  108.89    6.00
   5   7   1  105.79    7.20
  -5   7  -1  107.49    8.50
   5  -7  -1  111.29    4.90
   5  -7  -1  113.99    5.10
  -5  -7   1  126.09    8.80
  -5   9   1  541.05   20.00
   5  -9   1  556.24   24.60
   5  -9   1  525.65   19.40
  -5   9   1  574.04   25.20
   5   9  -1  529.15   24.60
  -5  -9  -1  568.44   24.30
   5   9  -1  574.94   21.70
  -5  -9   1  547.45   24.30
  -5   9  -1  561.34   25.20
   5   9   1  543.55   21.80
   5   9   1  560.64   25.40
   5  -9  -1  560.94   24.40
  -5   9  -1  558.24   19.50
   5  -9  -1  553.04   15.80
   5  -9  -1  544.55   20.40
   5  11  -1   94.49    7.90
   5 -11   1   87.39    9.70
  -5  11   1   88.69    6.90
  -5  11   1   91.59   10.10
  -5 -11  -1   88.89    9.60
   5  11  -1   87.19    9.70
   5  11   1   87.29    8.00
  -5  11  -1   90.29    6.70
  -5  11  -1   81.19    9.60
  -5 -11   1   81.69    9.60
   5  11   1   90.99   10.60
   5 -11  -1   95.49   10.20
  -5  13   1   22.70    4.60
  -5  13   1   12.40    5.90
   5  13  -1   30.00    8.10
   5  13  -1   27.80    5.50
   5 -13   1   25.60    7.00
   5 -13  -1   30.90    8.00
  -5  13  -1   29.40    7.70
   5  13   1   35.60    7.90
   5  13   1   35.00    6.30
  -5 -13   1   27.20    7.00
  -5  13  -1   31.20    4.90
   5   1  -3 3303.57   92.09
  -5  -1  -3 3333.27   94.39
  -5  -1  -3 3373.36   97.29
   5   1  -3 3357.46   95.89
   5  -1   3 3275.57   92.69
  -5  -1  -3 3219.48   91.09
   5  -1   3 3339.07   95.79
  -5   1   3 3415.96   92.69
  -5   1   3 3308.17   94.49
   5  -1   3 3332.57   94.49
  -5   1   3 3325.37   94.29
   5   1  -3 3388.56   94.39
  -5  -1  -3 3319.27   96.59
  -5  -1   3 3406.66   94.59
   5   1   3 3251.37   93.99
   5  -1  -3 3528.15   92.89
   5   1   3 3247.28   96.39
  -5   1  -3 3399.76   92.99
  -5   1  -3 3403.86   96.29
  -5  -1   3 3403.06   92.09
   5  -1  -3 3399.46   94.19
   5  -1  -3 3283.27   94.39
   5   1   3 3317.77   91.29
  -5   1  -3 3323.17   94.39
  -5  -1   3 3251.87   95.39
   5   3  -3 1342.37   40.70
   5  -3   3 1424.46   37.90
  -5   3   3 1452.05   41.80
   5  -3   3 1414.46   40.80
   5   3  -3 1451.65   40.20
  -5   3   3 1433.56   39.60
  -5  -3  -3 1417.76   41.50
  -5  -3  -3 1337.17   39.20
  -5   3   3 1385.16   39.50
   5   3  -3 1423.86   37.90
  -5   3   3 1410.96   40.20
  -5  -3  -3 1411.86   41.50
   5  -3   3 1400.56   38.30
   5   3  -3 1420.96   37.90
  -5  -3  -3 1383.16   40.30
   5   3  -3 1421.66   39.70
  -5  -3  -3 1366.56   38.80
   5  -3   3 1418.16   40.70
   5  -3  -3 1386.76   39.40
   5  -3  -3 1380.66   40.10
   5  -3  -3 1426.66   39.60
  -5   3  -3 1403.66   38.30
  -5   3  -3 1379.16   40.80
   5   3   3 1359.96   38.90
  -5   3  -3 1430.56   37.90
  -5  -3   3 1445.36   41.10
  -5  -3   3 1441.56   40.10
  -5  -3   3 1397.06   39.60
   5   3   3 1360.86   39.30
   5   3   3 1381.76   40.50
   5  -3  -3 1367.06   40.30
  -5   3  -3 1373.46   40.60
   5  -5   3  622.34   22.20
   5  -5   3  619.14   17.00
  -5   5   3  600.34   21.80
   5   5  -3  587.54   19.80
   5   5  -3  606.94   21.50
  -5  -5  -3  560.34   20.50
  -5  -5  -3  592.64   22.10
   5  -5   3  598.44   17.90
  -5  -5  -3  592.34   18.80
   5   5  -3  554.34   21.20
  -5   5   3  595.64   19.70
   5   5  -3  589.74   15.70
  -5  -5  -3  608.34   20.40
   5  -5   3  590.14   21.50
  -5   5  -3  611.44   18.10
   5  -5  -3  616.44   21.30
   5   5   3  583.54   20.20
  -5   5  -3  598.54   16.90
  -5  -5   3  594.64   21.90
   5   5   3  610.64   22.40
   5   5   3  601.64   18.80
   5  -5  -3  584.14   19.60
   5   5   3  603.84   20.90
  -5  -5   3  569.04   19.60
   5  -5  -3  588.94   19.00
  -5   5  -3  593.14   21.90
  -5  -5   3  586.64   21.10
   5  -5  -3  590.24   21.30
  -5   5  -3  579.24   21.50
   5  -5  -3  586.64   21.50
   5  -7   3  311.07   11.70
  -5   7   3  322.97   13.40
  -5  -7  -3  310.17   11.60
   5   7  -3  310.17   15.50
  -5   7   3  340.37   16.20
   5  -7   3  336.57   16.30
  -5  -7  -3  322.07   14.70
   5   7  -3  325.57   13.60
  -5  -7   3  314.97   15.80
  -5   7  -3  302.77   15.60
   5  -7  -3  324.57   12.20
   5   7   3  318.87   14.50
   5  -7  -3  324.37   12.00
   5   7   3  326.47   13.80
   5  -7  -3  324.67   15.30
  -5  -7   3  295.37   13.10
   5  -7  -3  322.97   13.50
   5   7   3  312.67   16.10
   5  -9   3 1791.12   58.99
  -5  -9  -3 1782.22   56.89
   5  -9   3 1639.74   50.89
   5   9  -3 1850.11   59.29
  -5   9   3 1840.92   53.99
  -5  -9  -3 1701.63   49.50
   5   9  -3 1875.21   54.39
  -5   9   3 1894.81   59.99
   5   9   3 1758.12   59.49
   5   9   3 1759.62   55.39
  -5   9  -3 1743.33   58.69
   5  -9  -3 1826.72   50.59
  -5   9  -3 1796.22   51.59
  -5  -9   3 1871.31   59.29
   5  -9  -3 1807.12   57.59
   5   9   3 1768.82   49.70
   5  -9  -3 1785.82   50.19
   5  11  -3   34.40    5.40
   5 -11   3   30.40    4.40
  -5  11   3   33.10    6.90
  -5  11   3   27.30    4.80
   5 -11   3   40.20    8.20
  -5 -11  -3   26.20    6.00
   5  11  -3   39.00    7.90
  -5 -11   3   32.00    7.30
   5  11   3   29.80    5.90
   5 -11  -3   32.50    2.60
  -5  11  -3   43.90    4.60
   5 -11  -3   32.30    6.70
  -5  11  -3   32.80    7.60
   5 -11  -3   33.40    2.50
   5  11   3   32.50    7.80
   5 -13   3   35.50    8.50
   5  13  -3   45.80    6.80
   5  13  -3   29.90    8.00
  -5  13   3   43.80    9.00
  -5 -13  -3   39.60    8.30
  -5  13   3   40.80    6.40
  -5  13  -3   35.80    4.50
   5 -13  -3   37.50    9.90
   5  13   3   41.90    9.20
  -5 -13   3   44.00    9.20
   5  13   3   32.50    6.50
  -5  13  -3   32.40    8.40
  -5  -1  -5   99.79    5.50
   5  -1   5   92.99    4.50
   5  -1   5  100.89    5.10
   5   1  -5  100.69    4.50
  -5  -1  -5  100.19    3.40
   5  -1   5   91.49    5.30
   5   1  -5  100.39    5.40
  -5  -1  -5   97.49    5.40
   5   1  -5   97.59    5.20
  -5   1   5   74.19    4.50
  -5   1   5   80.49    4.50
  -5   1   5   78.29    5.20
   5   1  -5  103.59    5.50
   5  -1  -5   86.49    4.80
  -5   1  -5  103.09    4.70
  -5   1  -5  103.89    5.40
   5  -1  -5   90.49    4.60
   5   1   5   89.19    5.30
  -5   1  -5  106.79    5.20
   5  -1  -5   98.09    5.60
  -5  -1   5   94.19    5.30
  -5  -1   5   93.09    5.30
  -5   1  -5  107.39    6.60
  -5  -1   5   89.79    5.20
  -5   1  -5  114.59    5.30
   5   1   5   89.39    3.20
   5   1   5   89.79    5.40
   5  -1  -5  102.29    5.60
  -5  -1   5   95.89    4.40
   5  -1  -5   94.89    5.40
   5   3  -5 3497.95  100.29
  -5  -3  -5 3674.53   97.19
  -5   3   5 3790.12   99.99
   5  -3   5 3672.53   97.79
   5   3  -5 3711.53   97.99
   5  -3   5 3787.22  100.39
  -5  -3  -5 3730.53  101.39
  -5  -3  -5 3815.62   97.39
  -5  -3  -5 3597.04   99.99
   5  -3   5 3713.43  100.09
  -5   3   5 3744.73   99.89
   5  -3   5 3667.83   98.19
  -5  -3  -5 3722.03  101.39
   5   3  -5 3748.12   99.39
  -5  -3  -5 3620.04   99.39
   5  -3  -5 3602.84   99.79
   5   3   5 3608.24  100.19
  -5   3  -5 3721.83   97.79
  -5   3  -5 3737.23  100.39
  -5  -3   5 3623.04   98.79
   5  -3  -5 3675.43   99.59
   5  -3  -5 3600.14   99.49
  -5   3  -5 3438.96   99.59
  -5  -3   5 3639.14   99.09
  -5  -3   5 3718.73   98.09
  -5  -3   5 3674.53  100.59
   5  -3  -5 3613.04   99.99
   5  -3  -5 3853.41   99.39
   5   3   5 3705.13   99.69
  -5   3  -5 3669.73   98.19
  -5  -5  -5 1754.62   50.79
  -5   5   5 1818.92   53.39
  -5  -5  -5 1693.53   50.49
  -5   5   5 1899.01   51.49
  -5  -5  -5 1744.03   50.29
   5   5  -5 1802.62   50.99
   5  -5   5 1732.03   55.19
   5   5  -5 1805.32   48.00
   5   5  -5 1807.52   48.00
   5  -5   5 1727.43   48.90
  -5  -5  -5 1778.22   54.29
  -5  -5  -5 1653.63   51.79
   5   5  -5 1750.12   52.49
   5  -5   5 1787.42   48.40
  -5   5   5 1765.22   51.59
   5  -5   5 1763.12   53.49
   5   5   5 1761.82   50.79
   5  -5  -5 1766.52   53.09
   5  -5  -5 1766.32   51.29
  -5  -5   5 1794.42   53.79
   5  -5  -5 1789.02   51.89
  -5   5  -5 1744.23   48.30
   5  -5  -5 1778.62   50.99
  -5   5  -5 1771.22   48.90
   5   5   5 1796.92   52.69
  -5   5  -5 1786.22   53.29
  -5  -5   5 1651.63   50.59
  -5  -5   5 1732.63   51.89
   5  -5  -5 1799.32   52.09
   5   7  -5  524.25   21.20
  -5   7   5  479.05   21.10
  -5  -7  -5  466.65   19.30
  -5  -7  -5  434.66   21.00
   5  -7   5  499.25   13.80
  -5   7   5  498.55   18.00
  -5   7   5  476.05   18.80
   5  -7   5  489.65   21.40
  -5  -7  -5  458.55   18.70
   5  -7   5  473.15   16.20
   5   7  -5  478.25   18.30
  -5  -7  -5  431.16   17.00
  -5   7  -5  488.95   16.40
  -5  -7   5  528.55   22.00
   5   7   5  460.45   21.40
  -5  -7   5  486.35   18.10
   5   7   5  496.65   17.70
   5   7   5  438.26   19.30
   5  -7  -5  467.15   17.40
   5  -7  -5  496.35   20.00
  -5   7  -5  456.05   20.60
  -5  -9  -5 1216.88   43.10
   5  -9   5 1054.29   33.70
   5   9  -5 1151.08   36.70
  -5   9   5 1092.29   41.30
  -5   9   5 1096.59   37.30
  -5  -9  -5 1088.69   34.10
  -5  -9  -5 1208.88   39.30
   5  -9   5 1091.39   41.10
   5   9  -5 1101.29   40.60
   5  -9  -5 1115.19   35.20
  -5   9  -5 1152.28   41.50
   5   9   5 1155.78   34.70
  -5   9  -5 1156.08   34.20
   5  -9  -5 1046.70   34.30
   5  -9  -5 1104.29   39.30
  -5  -9   5 1100.19   41.30
   5   9   5 1062.09   41.40
  -5  11   5  404.16   22.80
  -5 -11  -5  423.06   20.80
  -5  11   5  399.36   18.60
   5  11  -5  420.06   22.80
  -5 -11  -5  429.66   24.30
   5 -11   5  405.56   22.80
   5 -11   5  339.57   14.80
   5  11  -5  439.16   18.40
  -5 -11  -5  380.76   14.70
  -5 -11  -5  383.76   14.90
  -5 -11   5  428.66   23.20
   5  11   5  405.46   19.90
   5 -11  -5  435.86   21.90
  -5  11  -5  374.36   15.30
   5  11   5  390.76   23.00
   5 -11  -5  395.56   15.20
   5 -11  -5  401.56   15.50
  -5  11  -5  377.46   22.10
  -5 -13  -5  175.48   14.10
   5 -13   5  213.08   17.00
   5  13  -5  189.68   15.90
  -5 -13  -5  207.88   17.90
  -5  13   5  160.38   15.30
  -5  13   5  158.88   11.80
   5  13  -5  192.98   11.90
   5  13   5  175.18   13.10
  -5  13  -5  168.98   15.40
  -5  13  -5  184.48    9.30
  -5 -13   5  163.88   15.20
   5  -1   7   81.49    5.60
   5  -1   7   82.79    5.70
   5   1  -7   72.39    5.10
  -5  -1  -7   92.49    5.90
   5   1  -7   90.39    5.70
  -5  -1  -7  105.09    6.50
   5   1  -7   86.99    4.80
  -5   1   7   73.79    5.70
   5   1  -7   83.99    5.80
  -5   1   7   70.79    5.30
  -5  -1  -7   98.79    3.90
   5  -1   7   71.09    4.40
  -5  -1  -7  102.79    6.30
  -5   1   7   75.39    4.80
  -5   1  -7  106.79    6.10
   5  -1  -7   86.19    5.10
  -5   1  -7   94.09    4.90
   5   1   7   82.79    5.70
  -5  -1   7   73.09    5.30
   5  -1  -7   92.99    5.30
   5  -1  -7   88.89    5.90
   5   1   7   79.49    5.80
   5   1   7   88.69    3.70
  -5   1  -7   99.79    6.10
   5  -1  -7   86.59    6.10
  -5  -1   7   70.19    5.10
  -5   1  -7   94.39    5.70
  -5   1  -7  102.69    5.80
   5   1   7   82.79    5.80
  -5  -3  -7  710.43   24.30
  -5  -3  -7  703.03   20.50
   5  -3   7  700.33   23.80
   5  -3   7  727.33   23.10
   5   3  -7  698.53   22.60
   5   3  -7  747.73   23.80
  -5   3   7  689.13   24.30
   5   3  -7  721.53   23.10
  -5   3   7  680.93   22.50
  -5  -3  -7  681.03   23.80
  -5  -3  -7  670.73   24.70
  -5  -3  -7  703.63   20.60
  -5   3   7  663.13   23.90
   5   3  -7  692.23   24.20
   5  -3   7  733.23   23.90
   5  -3  -7  680.23   23.90
  -5   3  -7  738.03   23.10
  -5  -3   7  702.13   22.80
   5  -3  -7  697.93   22.80
  -5   3  -7  719.73   22.60
  -5  -3   7  679.33   22.50
   5  -3  -7  686.33   23.80
   5   3   7  683.23   24.30
   5  -3  -7  705.03   24.00
   5   3   7  659.63   24.40
  -5  -3   7  675.03   23.20
  -5  -3   7  721.13   24.50
   5   3   7  685.43   24.00
  -5   3  -7  698.83   23.50
  -5   3  -7  748.23   22.70
  -5   3  -7  741.73   24.40
   5  -3  -7  707.03   24.00
   5  -5   7  181.28    8.30
  -5  -5  -7  180.08    8.50
   5   5  -7  203.48    8.40
  -5   5   7  211.88   10.20
  -5   5   7  214.08   10.70
   5   5  -7  219.78   11.00
   5  -5   7  169.58   10.60
  -5  -5  -7  157.98    9.40
  -5  -5  -7  186.38   11.40
   5  -5   7  169.08    8.40
  -5   5   7  220.18   11.00
  -5  -5  -7  184.88    8.60
   5   5  -7  211.88   10.00
   5  -5  -7  211.68   10.30
  -5  -5   7  206.38   11.40
  -5  -5   7  211.88   10.40
  -5   5  -7  161.78    8.10
  -5   5  -7  174.08   10.60
   5   5   7  182.78   10.00
  -5  -5   7  216.28    8.70
  -5   5  -7  182.38    8.50
  -5  -5   7  198.18    9.80
   5   5   7  175.38   10.40
   5  -5  -7  210.98   11.50
   5   7  -7  168.88   11.20
   5  -7   7  195.18    7.70
  -5  -7  -7  176.48    9.80
   5  -7   7  189.68    8.80
   5   7  -7  173.58    9.90
  -5   7   7  163.68    9.90
   5   7  -7  174.28    6.90
  -5   7   7  168.78   10.60
  -5  -7  -7  182.48   10.20
  -5   7   7  160.48   11.60
   5   7  -7  180.88    7.00
  -5   7  -7  208.68    9.10
  -5  -7   7  174.18   11.90
   5  -7  -7  176.78   12.00
   5   7   7  193.08   10.40
  -5   7  -7  190.38    7.60
   5  -7  -7  166.68   10.40
  -5   7  -7  200.38   12.50
   5   7   7  179.88   11.40
  -5  -9  -7  354.16   17.20
   5   9  -7  371.06   19.60
   5   9  -7  385.86   16.70
  -5   9   7  361.26   17.90
  -5   9   7  366.46   16.20
   5  -9   7  340.37   14.10
   5  -9   7  359.86   20.00
  -5   9   7  384.06   20.50
  -5  -9  -7  363.46   20.70
   5   9   7  341.57   18.10
   5  -9  -7  374.56   18.40
  -5   9  -7  359.76   19.60
   5  -9  -7  387.66   20.70
   5   9   7  360.06   15.90
  -5  -9   7  379.76   20.50
  -5   9  -7  375.46   14.50
   5 -11   7  588.34   29.20
   5  11  -7  579.14   25.80
  -5  11   7  597.74   29.70
  -5 -11  -7  595.14   26.30
   5  11  -7  625.74   29.30
  -5  11   7  572.44   25.30
  -5 -11  -7  596.04   30.70
   5  11   7  599.44   26.80
  -5  11  -7  617.44   21.20
  -5 -11   7  558.54   28.90
   5 -11  -7  572.04   22.80
   5  11   7  621.54   22.60
   5 -11  -7  592.94   27.20
   5 -11  -7  604.84   30.30
  -5  11  -7  638.54   29.80
   5  13  -7  138.49   10.10
  -5 -13  -7  110.49   11.10
   5 -13   7  118.19   13.00
  -5  13   7  127.49   10.90
  -5 -13  -7  117.79   14.30
   5  13  -7  134.69   13.90
   5  13   7  125.39   11.70
  -5  13  -7  120.19    8.40
  -5 -13   7  140.39   14.30
   5 -13  -7  125.69    9.10
  -5  13  -7  133.49   14.00
   5 -13  -7  132.29   14.60
   5  -1   9   94.29    5.50
  -5   1   9   90.39    5.80
  -5  -1  -9   90.39    6.90
   5  -1   9   94.49    6.60
   5   1  -9  105.99    7.20
   5   1  -9   94.39    6.60
  -5   1   9   95.39    6.00
  -5  -1  -9   94.39    4.50
  -5   1   9  100.99    7.30
   5   1  -9  102.59    5.90
   5   1  -9   90.49    7.00
   5  -1   9   95.79    6.80
  -5  -1   9   98.69    5.90
  -5   1  -9   98.19    6.80
   5   1   9   92.89    6.80
   5  -1  -9   90.99    5.80
  -5   1  -9   94.19    6.60
   5  -1  -9   92.59    5.90
  -5   1  -9   83.59    7.40
  -5  -1   9   96.39    6.40
   5   1   9  101.09    7.20
  -5   1  -9   88.59    5.30
   5   1   9   96.59    4.50
   5   1   9   96.89    6.80
  -5  -1   9  100.69    6.90
  -5   1  -9   93.39    6.40
   5  -1  -9   96.69    7.10
  -5  -3  -9 1289.77   41.40
   5  -3   9 1308.17   39.30
   5   3  -9 1242.58   38.30
  -5   3   9 1287.47   41.00
  -5  -3  -9 1280.07   35.30
  -5   3   9 1238.68   37.70
   5   3  -9 1239.38   38.70
  -5   3   9 1201.28   40.20
   5  -3   9 1280.57   39.10
   5   3  -9 1268.77   39.70
  -5   3  -9 1288.37   38.70
  -5   3  -9 1317.17   38.90
  -5  -3   9 1275.67   40.20
   5   3   9 1268.87   35.20
  -5   3  -9 1287.67   39.20
  -5  -3   9 1268.37   39.10
   5  -3  -9 1217.68   37.80
   5   3   9 1275.07   40.80
   5  -3  -9 1249.68   39.70
   5   3   9 1297.27   40.70
   5  -3  -9 1225.58   39.60
  -5   3  -9 1201.08   38.70
  -5  -3   9 1225.68   39.70
  -5   3  -9 1291.37   40.20
  -5   5   9  966.70   32.90
  -5  -5  -9  968.40   34.30
  -5  -5  -9  953.00   28.60
  -5   5   9  933.81   32.40
   5   5  -9  911.51   29.50
   5  -5   9  903.61   29.60
   5  -5   9  865.71   32.30
  -5  -5  -9  962.50   28.50
   5   5  -9  913.81   31.10
   5   5  -9  937.11   31.70
  -5   5   9  943.41   30.40
   5   5   9  928.21   33.10
  -5   5  -9  961.30   29.90
  -5   5  -9  894.81   32.50
   5   5   9  966.60   32.60
  -5   5  -9  890.61   29.50
   5  -5  -9  934.91   30.70
  -5  -5   9  898.71   29.50
  -5  -5   9  883.71   32.80
  -5   5  -9  890.71   29.60
   5  -5  -9 1015.90   33.70
   5   7  -9  486.75   19.50
  -5  -7  -9  474.65   18.40
   5   7  -9  484.05   16.70
   5  -7   9  495.85   17.20
   5  -7   9  497.45   22.80
  -5   7   9  450.35   21.00
   5   7  -9  459.65   21.00
  -5  -7  -9  458.25   18.50
   5  -7   9  457.95   18.00
  -5  -7  -9  498.35   23.50
  -5   7   9  489.65   20.70
   5   7  -9  484.25   16.80
  -5   7  -9  518.55   18.40
  -5  -7   9  516.55   23.20
   5  -7  -9  462.85   23.60
  -5   7  -9  496.25   22.40
  -5   7  -9  503.55   17.30
  -5   7  -9  484.25   18.10
   5   7   9  500.55   22.20
   5   7   9  486.85   20.50
   5  -7  -9  462.15   19.80
  -5   9   9   68.79    7.80
  -5   9   9   60.99    7.90
   5   9  -9   69.49    6.60
  -5  -9  -9   61.29    9.60
  -5  -9  -9   67.39    6.70
   5   9  -9   62.99    7.90
   5  -9   9   74.09    8.90
   5   9   9   68.99    8.00
   5  -9  -9   69.79    7.10
  -5   9  -9   62.79    3.40
   5   9   9   73.29    7.10
  -5   9  -9   65.89    8.20
  -5  -9   9   63.39    8.10
  -5   9  -9   77.09    5.90
   5  -9  -9   70.69    8.80
  -5 -11  -9   62.29   13.40
  -5  11   9   74.69    8.40
   5  11  -9   67.49   10.40
  -5 -11  -9   65.49    7.60
   5  11  -9   78.79    7.40
   5  11   9   62.59    6.90
   5 -11  -9   73.79   11.90
  -5  11  -9   68.09    5.80
  -5  11  -9   59.29    9.90
   5  11   9   51.89    8.90
  -5 -11   9   61.49   12.10
   5 -11  -9   64.29    8.00
   5 -11  -9   76.19    7.70
  -5  13   9   15.10    5.30
  -5 -13  -9   15.70    6.40
   5 -13   9   18.70    6.60
   5  13  -9   18.10    5.70
  -5 -13  -9   12.00    4.40
  -5 -13  -9    9.00    4.40
   5  13  -9   13.50    4.00
   5  13   9   15.40    5.30
   5 -13  -9   17.60    4.60
   5 -13  -9   17.60    7.10
   5 -13  -9    8.10    4.80
  -5  13  -9   15.60    5.20
  -5 -13   9   14.50    5.40
   5  -1  11  552.04   18.70
  -5  -1 -11  532.95   17.00
  -5   1  11  501.75   19.40
   5   1 -11  461.55   19.30
  -5  -1 -11  557.74   21.60
   5  -1  11  551.44   21.60
  -5   1  11  538.15   22.00
   5   1 -11  522.85   21.50
  -5   1  11  519.65   19.10
   5   1 -11  501.35   18.90
   5   1  11  584.54   17.20
  -5  -1  11  524.75   21.40
  -5  -1  11  527.45   20.00
   5   1  11  567.34   22.00
  -5  -1  11  478.55   20.20
  -5   1 -11  545.85   21.30
   5  -1 -11  531.45   19.60
  -5   1 -11  529.05   20.90
   5  -1 -11  558.14   22.20
  -5   1 -11  499.65   18.30
   5   1  11  559.44   22.10
   5   3 -11   89.89    7.30
  -5   3  11   78.49    5.70
   5  -3  11   82.79    6.80
  -5  -3 -11   73.79    4.10
  -5   3  11   71.79    7.20
   5  -3  11   95.29    7.00
  -5  -3 -11   80.89    7.50
   5   3 -11   79.79    6.10
   5  -3 -11   84.39    7.60
  -5  -3  11   78.59    6.80
  -5  -3  11   74.29    6.00
  -5  -3  11   77.09    6.80
  -5   3 -11   90.89    7.40
   5   3  11   79.19    7.40
   5   3  11   63.19    6.70
   5  -3 -11   86.59    6.90
   5   3  11   69.19    3.90
  -5   3 -11   92.59    6.90
  -5   5  11   32.00    5.90
   5   5 -11   27.80    5.00
  -5  -5 -11   42.90    7.00
  -5  -5 -11   38.50    3.50
   5  -5  11   31.20    4.90
   5   5 -11   30.50    5.20
  -5   5  11   38.30    6.70
  -5   5  11   32.30    4.10
   5  -5  11   31.40    5.40
  -5  -5 -11   47.10    5.50
   5   5  11   41.80    6.50
   5  -5 -11   38.10    4.30
  -5   5 -11   38.40    4.60
  -5   5 -11   38.20    6.10
   5  -5 -11   42.20    6.70
   5   5  11   37.20    6.40
  -5  -5  11   18.80    4.80
  -5  -5  11   26.20    4.40
   5   7 -11  218.08   13.70
   5  -7  11  291.27   12.40
   5   7 -11  220.48   11.20
  -5   7  11  261.17   14.80
  -5  -7 -11  249.88   16.00
  -5   7  11  235.58   14.70
  -5  -7 -11  244.48   11.70
  -5  -7 -11  242.08   11.30
   5   7 -11  219.38   12.80
   5  -7  11  276.97   16.00
   5   7  11  257.37   15.60
  -5   7 -11  260.67   12.40
   5   7  11  257.27   14.70
  -5  -7  11  244.88   11.50
   5  -7 -11  220.58   12.50
  -5   7 -11  235.78   15.00
  -5  -7  11  244.78   15.70
   5  -7 -11  254.67   15.70
   5   9 -11   79.79    7.60
   5   9 -11   90.49    7.50
   5   9 -11   94.39    9.40
  -5  -9 -11   78.29    9.70
   5  -9  11   94.19   10.30
  -5   9  11   88.89    9.40
   5   9 -11   81.89    5.20
   5  -9  11   86.39    5.40
  -5  -9 -11   78.79    7.10
  -5   9  11   81.89    8.40
   5  -9 -11   84.59   10.00
  -5   9 -11   81.29    5.60
  -5  -9  11  109.09   11.30
   5   9  11   85.19    9.50
   5  -9 -11   72.49    7.50
  -5   9 -11   80.79    9.50
  -5   9 -11   89.29    7.00
   5   9  11   92.19    8.80
  -5  11  11   33.80    7.10
   5  11 -11   21.70    5.90
   5 -11  11   30.60    7.80
  -5 -11 -11   12.00    5.90
   5  11 -11   23.80    5.10
  -5 -11 -11   25.60    5.50
  -5  11 -11   17.40    3.80
   5  11  11   20.40    7.30
   5 -11 -11   16.50    6.10
   5  11  11   28.40    5.80
  -5  11 -11   25.50    6.80
  -5 -11  11   23.00    6.70
   5 -11 -11   15.80    5.10
   5 -11 -11   19.70    5.20
  -5  -1 -13  361.16   17.10
   5  -1  13  329.37   16.90
  -5  -1 -13  337.57   12.50
   5  -1  13  331.47   13.90
   5   1 -13  327.17   16.90
  -5   1  13  339.17   17.70
  -5   1  13  369.86   14.90
  -5  -1 -13  383.86   18.10
   5   1 -13  335.47   14.80
   5  -1 -13  308.27   14.10
  -5  -1  13  344.37   15.40
   5  -1 -13  342.47   15.20
  -5  -1  13  337.17   15.00
  -5  -1  13  332.37   17.00
   5  -1 -13  344.47   17.40
   5   1  13  338.77   17.60
  -5   1 -13  336.17   16.40
  -5   1 -13  336.07   16.70
  -5   1 -13  322.57   13.80
   5   1  13  363.46   14.30
  -5   3  13  190.08   12.90
   5   3 -13  191.48   10.90
  -5   3  13  206.68   10.30
   5  -3  13  217.18   11.60
   5  -3  13  212.98   14.40
  -5  -3 -13  193.88    7.80
   5   3 -13  201.08   12.60
  -5  -3 -13  180.08   12.50
   5   3  13  219.48   13.70
  -5  -3  13  217.18   12.40
   5  -3 -13  187.28   11.60
   5  -3 -13  205.28   13.50
  -5  -3  13  221.38   12.80
   5   3  13  210.68   13.40
   5  -3 -13  186.08   10.00
  -5   3 -13  225.98   12.80
   5   3  13  211.78    7.90
  -5   3 -13  220.08   12.40
  -5  -5 -13  210.58    8.70
  -5  -5 -13  191.58    8.20
  -5   5  13  206.28   10.60
  -5   5  13  189.68   13.20
  -5   5  13  211.08   13.90
   5   5 -13  191.88   12.20
   5  -5  13  201.88   11.70
   5   5 -13  170.98   11.30
  -5  -5 -13  212.68   14.10
   5   5  13  209.58   14.00
   5   5  13  192.78   13.10
  -5   5 -13  203.18   11.80
  -5   5 -13  191.78   12.70
  -5  -5  13  198.48   13.10
   5  -5 -13  206.48   14.00
  -5  -5  13  187.38   11.50
   5  -5 -13  198.98   13.30
  -5   7  13  804.82   34.10
  -5  -7 -13  821.42   27.10
  -5  -7 -13  878.01   36.20
   5   7 -13  835.32   31.70
   5  -7  13  872.81   30.10
   5  -7  13  927.11   35.20
  -5   7  13  805.52   33.40
   5   7 -13  823.72   32.60
  -5   7 -13  905.81   34.90
  -5  -7  13  862.11   35.20
   5  -7 -13  845.72   34.60
   5   7  13  834.82   33.60
  -5   7 -13  861.31   30.30
  -5  -7  13  836.52   29.50
   5   7  13  805.42   34.50
   5  -7 -13  824.82   30.00
   5   9 -13   78.99    9.20
  -5  -9 -13   77.69    6.60
  -5   9  13   74.79    9.10
   5  -9  13   92.59   10.60
  -5  -9 -13   85.79   10.70
  -5   9  13   76.79    8.90
   5  -9  13   84.49    6.40
   5   9 -13   73.99    5.90
   5   9 -13   90.99    8.60
  -5   9 -13   83.79    7.40
   5   9  13   98.69   10.90
  -5   9 -13   76.79    9.50
  -5  -9  13   84.09   10.70
   5  -9 -13   80.49    7.80
   5   9  13   78.49    9.10
   5  -9 -13   76.39    9.70
   5  11 -13   16.30    4.60
   5  11 -13   16.40    5.20
  -5 -11 -13    8.90    5.30
  -5  11  13   14.30    5.00
  -5  11  13    9.70    4.60
   5 -11  13   10.10    5.50
  -5 -11 -13   17.00    4.50
   5  11  13    9.40    4.70
  -5 -11  13   13.10    5.80
   5  11  13   10.50    4.80
  -5  11 -13   14.20    5.60
   5 -11 -13    6.70    3.90
   5 -11 -13   12.80    5.50
   5 -11 -13    8.80    3.90
  -5  11 -13   13.40    3.70
  -5  -1 -15  511.45   22.80
  -5   1  15  519.15   19.80
   5  -1  15  489.65   23.20
   5   1 -15  513.25   23.50
  -5  -1 -15  485.45   23.30
  -5  -1 -15  455.05   16.90
   5  -1  15  528.65   19.10
  -5   1  15  510.35   24.00
   5   1 -15  501.65   20.40
   5   1  15  513.75   24.10
  -5   1 -15  462.95   18.60
  -5  -1  15  483.85   23.00
   5  -1 -15  494.85   23.50
   5   1  15  508.25   17.10
  -5   1 -15  512.15   23.10
  -5  -1  15  507.15   20.80
   5  -1 -15  501.45   20.80
  -5   1 -15  540.85   25.60
  -5   3  15   18.00    3.70
   5  -3  15   17.30    4.40
  -5   3  15   21.30    5.40
   5  -3  15   16.50    3.90
  -5  -3 -15   16.80    2.10
  -5  -3 -15   22.90    5.30
   5   3 -15   18.60    4.00
   5   3 -15   15.40    4.60
  -5  -3 -15   11.40    4.50
   5  -3 -15   18.00    5.10
   5   3  15   15.40    4.70
   5   3  15   20.60    2.20
  -5  -3  15   24.30    5.60
  -5   3 -15   19.60    4.80
   5  -3 -15   14.40    5.50
   5  -3 -15   25.00    5.00
   5   3  15   21.10    5.20
  -5   3 -15   25.00    5.50
   5  -5  15  350.66   18.10
  -5  -5 -15  324.77   11.10
  -5   5  15  334.37   19.40
   5  -5  15  345.07   17.50
  -5   5  15  339.27   15.00
   5   5 -15  354.66   18.50
   5   5 -15  313.47   16.70
  -5  -5 -15  343.47   11.30
  -5  -5 -15  385.66   20.70
  -5  -5  15  347.27   18.80
   5   5  15  330.77   19.30
   5  -5 -15  339.77   20.10
   5  -5 -15  346.97   18.80
  -5   5 -15  352.56   17.60
   5   5  15  333.07   19.60
  -5  -5  15  317.87   17.00
  -5   5 -15  359.36   18.90
   5  -7  15  324.07   18.90
   5   7 -15  322.37   17.70
  -5  -7 -15  306.67   11.80
  -5  -7 -15  340.27   20.80
   5  -7  15  317.37   15.90
   5   7 -15  304.87   17.10
  -5   7  15  318.77   19.20
  -5  -7  15  305.67   15.70
  -5   7 -15  328.27   16.50
   5   7  15  307.67   18.90
   5  -7 -15  286.37   18.40
   5  -7 -15  301.07   19.80
  -5  -7  15  289.07   18.60
  -5   7 -15  335.07   19.10
   5  -7 -15  296.87   14.70
   5   7  15  306.27   19.40
   5   9 -15   71.89    6.70
  -5  -9 -15   67.09   11.00
   5  -9  15   72.99   11.70
   5  -9  15   72.39    7.60
  -5  -9 -15   71.69    5.80
  -5   9  15   73.39   10.20
   5   9 -15   74.59    8.30
   5   9 -15   66.99    9.90
  -5   9 -15   71.09   12.20
  -5  -9  15   93.49   11.60
   5  -9 -15   77.99   12.30
   5   9  15   85.39   12.90
   5   9  15   78.39    9.60
   5  -9 -15   71.59   11.40
  -5   9 -15   66.09    7.30
   5  -9 -15   90.19    8.30
   5   1 -17    8.80    4.10
   5   1 -17    9.60    3.10
  -5  -1 -17   16.70    5.00
   5  -1  17    9.90    4.00
  -5  -1 -17   10.80    2.50
  -5   1  17   10.60    2.90
   5  -1  17   13.60    3.20
  -5  -1 -17   11.70    4.40
  -5   1  17    8.80    4.00
   5   1  17    6.20    3.70
   5   1  17   16.00    2.70
  -5  -1  17   13.30    3.20
  -5  -1  17    5.40    3.50
  -5   1 -17   14.70    4.60
   5  -1 -17   13.50    4.10
   5  -1 -17    5.20    2.60
  -5   1 -17   14.00    4.40
  -5  -3 -17    8.30    4.30
   5   3 -17    6.20    3.30
  -5   3  17   11.70    4.00
  -5  -3 -17   11.60    1.50
   5   3 -17    9.70    3.70
  -5  -3 -17   11.10    3.90
  -5   3  17    9.60    2.90
   5  -3  17    8.80    4.20
   5  -3  17   13.00    3.60
   5  -3 -17   13.30    4.30
  -5  -3  17   13.80    4.50
  -5   3 -17   11.80    4.30
  -5  -3  17   11.20    3.60
   5  -3 -17   10.30    4.60
  -5   3 -17   11.10    3.90
   5   3  17   17.70    5.70
   5   5 -17   30.40    5.90
   5  -5  17   31.40    6.10
  -5   5  17   26.30    6.60
  -5  -5 -17   42.50    8.60
   5   5 -17   35.40    7.10
   5  -5  17   43.60    6.90
  -5   5  17   36.20    4.70
   5   5  17   27.80    6.60
  -5   5 -17   42.20    7.30
  -5  -5  17   44.10    7.90
   5  -5 -17   32.00    6.80
   5  -5 -17   36.20   12.30
  -5  -5  17   34.00    6.70
  -5   5 -17   44.50    7.60
  -5  -7 -17   88.39   10.80
  -5   7  17  108.59   11.40
   5  -7  17   91.49    8.90
   5   7 -17   91.19    9.50
   5   7 -17   97.19    9.90
   5  -7  17  105.19   10.50
  -5  -7  17   92.29    8.70
   5  -7 -17   93.59   10.60
   5   7  17   95.39   10.90
  -5  -7  17  107.69   11.30
  -5   7 -17   97.89   10.70
  -5   7 -17  107.99    9.90
   5  -7 -17   91.39   11.70
   5  -7 -17   86.59    7.30
   5   7  17   98.59   11.50
  -5  -9 -17   74.49   12.20
  -5   9  17   58.89   10.20
   5   9 -17   52.59   11.30
   5   9 -17   69.59   10.10
   5   9 -17   61.89    7.50
   5  -9  17   77.69   12.40
   5  -9  17   70.69    7.10
  -5   9 -17   85.79   10.60
  -5  -9  17   67.29   11.60
   5  -9 -17   43.80    9.80
   5   9  17   65.69   12.00
  -5   9 -17   76.79    8.30
   5  -9 -17   66.39   11.30
   5   9  17   53.49    9.50
   5  -1  19  103.59    7.50
   5   1 -19  104.79    8.90
  -5  -1 -19   88.09    9.80
  -5   1  19  108.79    8.10
  -5  -1 -19  126.29   22.60
  -5   1  19  105.69   11.50
   5   1  19  110.89   11.90
  -5  -1  19  111.69    9.20
  -5   1 -19  126.39   11.10
  -5   1 -19  111.89   11.30
   5  -1 -19  110.39    9.30
   5  -1 -19  105.49   10.90
  -5  -3 -19  132.89   12.20
  -5  -3 -19  127.39   12.90
   5   3 -19  121.89    9.90
   5  -3  19  118.09   12.10
  -5   3  19  112.39    7.70
   5  -3  19  133.29    9.80
  -5   3  19  128.19   12.80
  -5  -3  19  122.19   11.60
  -5  -3  19  103.29    9.80
   5  -3 -19  111.09    9.80
  -5   3 -19  124.79   11.30
   5  -3 -19  104.89   12.00
   5   3  19  116.89   12.20
  -5   3 -19  112.19   11.00
  -5  -5 -19   99.69   11.70
   5   5 -19  118.99   13.30
   5  -5  19  105.19   10.50
  -5  -5 -19  113.29   12.80
   5   5 -19   96.09    9.30
   5  -5  19  116.39   10.60
  -5   5  19   92.59   11.20
   5  -5 -19   96.39    7.30
  -5   5 -19  134.49   11.60
   5  -5 -19  102.79   10.50
  -5   5 -19   95.89   10.40
   5   5  19   96.89   11.80
   5  -5 -19  102.29   12.00
  -5  -5  19  101.09   10.60
  -5  -5  19  109.79   10.60
  -5  -7 -19   71.29   12.40
  -5  -7 -19   92.59   11.90
   5  -7  19   75.39    8.80
   5   7 -19   95.29   10.40
  -5   7  19   70.99   11.80
   5   7 -19   68.49    9.00
   5  -7 -19   72.69   12.50
  -5  -7  19   63.99   10.80
  -5   7 -19   94.79   10.50
  -5   7 -19   80.89   10.00
   5   7  19  102.49   11.90
  -5  -7  19   81.19    8.90
   5   1 -21   58.59   10.70
  -5   1  21   61.69    6.50
   5  -1  21   64.09    9.80
  -5   1  21   51.89    9.90
  -5  -1 -21   57.39    9.20
   5   1 -21   60.09    7.80
  -5  -1 -21   53.49   10.10
   5  -1  21   63.09   11.30
   5  -1 -21   48.10    9.70
  -5  -1  21   66.99   10.80
  -5  -1  21   64.09    7.40
  -5   1 -21   67.99   11.10
   5  -1 -21   62.79    8.00
   5   1  21   36.60    8.30
  -5   1 -21   62.39    9.40
   5   3 -21    4.80    3.70
   5   3 -21    0.30    2.90
  -5  -3 -21    3.40    4.00
   5  -3  21    9.90    3.70
  -5   3  21    6.90    4.60
   5  -3  21    4.50    3.90
  -5  -3  21    9.30    4.70
  -5   3 -21    8.40    4.70
  -5  -3  21    7.70    4.60
  -5   3 -21    0.20    3.40
   5  -3 -21    0.80    3.30
   5   3  21    7.90    4.30
   5  -3 -21    4.30    4.00
  -6   0   0    3.40    0.70
   6   0   0    1.60    0.50
  -6   0   0    1.00    0.50
   6   0   0    1.50    0.40
  -6   0   0    3.70    0.60
   6   0   0    1.30    0.50
  -6   0   0    1.40    0.40
  -6   2   0  360.06   11.20
   6  -2   0  380.06   12.60
   6   2   0  390.56   12.60
  -6  -2   0  383.66   12.20
   6   2   0  357.16   12.00
   6  -2   0  382.06   12.40
   6   2   0  382.86   12.30
  -6  -2   0  380.16   12.20
  -6   2   0  373.16   12.40
  -6  -2   0  370.56   11.10
   6   2   0  387.06   11.10
  -6  -2   0  365.46   12.30
  -6   2   0  370.66   12.60
  -6   2   0  377.76   10.50
   6  -2   0  373.46   10.40
   6  -2   0  370.16   11.30
   6   4   0 1631.64   47.70
  -6  -4   0 1677.83   48.40
  -6  -4   0 1673.33   47.40
   6  -4   0 1643.24   48.40
   6   4   0 1700.83   47.60
   6   4   0 1662.73   48.60
   6  -4   0 1644.64   48.40
  -6  -4   0 1682.63   48.10
   6   4   0 1696.43   44.40
  -6  -4   0 1679.43   44.50
   6  -4   0 1678.23   45.10
  -6   4   0 1655.13   45.20
   6  -4   0 1707.23   45.10
   6  -4   0 1648.44   45.30
   6  -4   0 1663.33   48.70
  -6   4   0 1710.53   48.70
  -6   6   0  393.16   16.80
   6  -6   0  379.36   11.90
   6  -6   0  379.26   11.80
   6  -6   0  386.76   16.50
  -6  -6   0  389.26   10.80
   6  -6   0  360.66   13.10
  -6  -6   0  380.46   15.00
   6   6   0  392.86   15.20
  -6  -6   0  384.26   16.10
   6   6   0  346.67   15.40
   6   6   0  396.66   16.90
   6   6   0  392.26   10.70
  -6   6   0  359.76   13.00
  -6   8   0  430.46   20.20
   6  -8   0  433.76   15.90
  -6  -8   0  435.16   19.60
  -6   8   0  428.26   15.70
   6  -8   0  431.36   19.70
   6   8   0  438.66   17.90
   6  -8   0  435.46   12.80
   6  -8   0  421.86   12.50
   6   8   0  435.06   20.40
  -6  10   0   11.80    3.90
   6  10   0    8.30    2.90
  -6  10   0    5.60    2.20
   6 -10   0    5.80    2.80
   6  10   0    3.90    3.20
   6 -10   0    7.30    2.30
  -6 -10   0    9.40    3.70
   6  12   0  381.16   18.30
   6  12   0  370.06   22.70
   6 -12   0  382.56   22.10
  -6  12   0  362.36   22.20
  -6  12   0  370.26   15.90
  -6 -12   0  378.46   21.60
   6 -14   0  171.88   15.60
  -6  14   0  176.58   10.70
  -6  14   0  202.08   17.60
   6  14   0  179.38   12.60
   6  14   0  165.38   16.20
  -6 -14   0  182.88   15.90
   6   0  -2  258.57    8.70
  -6   0  -2  253.47    7.40
  -6   0   2  264.67    8.60
   6   0   2  251.17    7.40
   6   0  -2  262.07    8.50
   6   0   2  249.78    8.70
  -6   0   2  263.27    8.50
  -6   0   2  248.48    8.60
  -6   0  -2  247.58    8.20
   6   0   2  252.47    8.20
  -6   0  -2  250.87    8.60
  -6   0  -2  245.68    8.70
   6   0   2  248.38    8.60
   6   0  -2  257.17    8.50
  -6  -2  -2 2623.74   69.09
   6   2  -2 2475.45   66.49
  -6   2   2 2505.25   68.09
   6  -2   2 2586.84   68.39
  -6  -2  -2 2547.15   67.39
   6   2  -2 2472.95   66.39
  -6  -2  -2 2549.34   68.89
  -6   2   2 2601.44   67.79
   6   2  -2 2536.65   67.49
   6   2  -2 2525.95   67.79
  -6  -2  -2 2505.85   68.19
   6   2  -2 2362.66   68.09
   6  -2  -2 2525.65   67.19
   6  -2  -2 2496.75   67.99
   6  -2  -2 2384.16   67.59
  -6  -2   2 2485.75   67.69
  -6   2  -2 2550.64   65.59
   6  -2  -2 2508.85   67.49
  -6  -2   2 2586.24   67.49
  -6   2  -2 2535.05   68.19
  -6   2  -2 2543.45   66.89
   6   2   2 2567.44   66.69
   6  -4   2 2874.21   78.39
   6  -4   2 2856.11   74.39
  -6  -4  -2 2824.02   78.79
  -6  -4  -2 2865.81   77.59
   6   4  -2 2778.72   73.39
  -6   4   2 2785.42   75.89
   6   4  -2 2798.12   73.49
   6  -4   2 2926.61   78.69
  -6   4   2 2904.51   78.39
   6   4  -2 2787.22   77.89
  -6  -4  -2 2827.82   75.39
   6   4  -2 2767.12   76.79
   6   4  -2 2677.23   77.89
   6  -4   2 2830.52   74.29
  -6   4  -2 2852.71   74.29
  -6   4  -2 2916.01   78.69
   6  -4  -2 2828.22   75.79
   6  -4  -2 2645.44   77.69
  -6  -4   2 2772.32   78.29
  -6   4  -2 2709.03   78.19
   6  -4  -2 2793.62   75.69
   6  -4  -2 2732.93   75.79
  -6  -4   2 2825.52   77.79
   6   4   2 2905.21   77.79
   6  -4  -2 2864.71   78.29
   6   4   2 2827.62   78.89
   6   4   2 2911.51   75.49
  -6  -4   2 2808.02   76.79
  -6   4  -2 2855.51   74.29
   6   4   2 2831.32   76.99
   6  -4  -2 2833.92   77.99
   6   6  -2   92.09    7.20
  -6   6   2   90.39    7.10
   6  -6   2  101.29    3.50
  -6   6   2   78.29    5.20
  -6  -6  -2   89.09    6.40
   6  -6   2   91.39    4.60
   6  -6   2   90.89    7.10
  -6  -6  -2   89.89    6.60
   6   6  -2   93.39    6.10
  -6  -6  -2   88.19    4.60
   6  -6   2   90.79    3.40
   6  -6  -2   85.09    6.70
  -6   6  -2   94.49    4.80
   6  -6  -2   88.79    5.50
  -6   6  -2   83.79    7.00
   6  -6  -2   90.69    4.90
   6   6   2   93.29    4.60
   6  -6  -2   88.49    4.80
   6   6   2   85.09    7.20
   6   6   2   86.59    6.40
   6   6   2   91.09    6.40
  -6  -6   2   96.49    7.40
   6   8  -2    2.30    2.30
  -6  -8  -2    8.50    3.30
  -6  -8  -2    5.60    1.40
   6   8  -2    4.50    2.00
  -6   8   2    3.30    2.40
   6  -8   2    5.50    3.10
  -6   8   2    2.30    1.50
   6  -8   2    7.70    1.90
  -6  -8   2    1.90    2.10
   6  -8  -2    2.80    2.40
   6   8   2    5.90    1.40
   6   8   2   11.90    4.40
  -6   8  -2    7.00    1.70
   6  -8  -2    2.10    1.40
   6  -8  -2    4.30    1.40
   6  -8  -2   11.00    2.00
  -6   8  -2    1.90    2.50
   6   8   2    7.30    2.70
   6  10  -2  370.66   17.00
  -6 -10  -2  391.26   19.60
  -6  10   2  373.06   16.00
   6  10  -2  368.46   20.30
  -6  10   2  391.16   20.90
   6 -10   2  371.96   14.70
   6 -10   2  395.86   20.80
   6  10   2  378.56   21.00
   6 -10  -2  348.07   11.80
  -6  10  -2  386.96   14.80
  -6 -10   2  370.36   20.00
   6 -10  -2  368.56   12.10
  -6  10  -2  369.86   20.40
   6  10   2  427.86   18.50
   6 -10  -2  375.96   20.00
  -6  12   2   53.29    9.60
   6  12  -2   59.39    6.80
   6 -12   2   47.10    8.90
   6  12  -2   57.29    9.90
  -6  12   2   58.99    6.10
  -6 -12  -2   62.59    8.20
  -6  12  -2   59.69    5.30
   6 -12  -2   56.99    9.50
  -6  12  -2   60.29   10.20
  -6 -12   2   55.49    9.40
   6  12   2   55.89    6.60
   6  12   2   68.09   11.20
  -6 -14  -2   76.19   12.00
   6  14  -2   61.09    7.30
   6 -14   2   59.49   11.00
  -6  14   2   57.69    6.60
   6  14  -2   49.00   10.10
  -6  14   2   49.30   10.90
   6  14   2   46.90    9.30
  -6  14  -2   66.19   11.70
  -6  14  -2   51.89    6.80
  -6 -14   2   55.49   10.10
   6  14   2   64.49    9.10
   6 -14  -2   55.69   10.40
  -6   0  -4    2.40    0.60
  -6   0   4    3.20    1.10
   6   0  -4    0.80    0.80
   6   0   4    1.30    0.80
   6   0  -4    1.80    1.00
  -6   0   4    1.40    0.90
  -6   0  -4    1.50    0.90
  -6   0   4    0.50    0.80
   6   0  -4    3.60    1.10
  -6   0  -4    0.40    0.80
  -6   0  -4    3.50    1.00
   6   0  -4    0.60    0.40
   6   0   4    2.00    1.00
   6   0   4    3.30    0.60
  -6   0   4    1.20    0.50
   6   0   4    0.70    0.90
   6   2  -4 4272.77  117.99
   6  -2   4 4541.55  118.09
   6   2   4 4448.75  118.79
   6  -4   4  736.33   24.50
   6  -4   4  737.73   21.20
   6   4  -4  709.23   20.60
  -6   4   4  720.43   22.80
   6   4  -4  684.13   22.70
  -6  -4  -4  746.93   22.20
  -6  -4  -4  745.13   25.30
  -6   4   4  688.43   23.80
   6   4  -4  644.54   23.80
   6   4  -4  671.63   23.20
  -6  -4  -4  722.83   25.10
  -6   4   4  683.23   22.70
  -6  -4  -4  726.23   22.40
   6  -4   4  755.72   20.90
   6   4  -4  705.43   20.50
   6  -4   4  742.33   24.20
  -6  -4  -4  710.73   22.50
  -6   4   4  725.43   23.50
  -6  -4   4  689.63   24.30
   6  -4  -4  693.33   23.70
  -6   4  -4  748.03   30.30
   6  -4  -4  683.73   23.30
  -6   4  -4  741.13   20.80
  -6   4  -4  739.63   21.10
  -6   4  -4  757.72   24.70
   6   4   4  721.03   22.60
  -6  -4   4  666.93   22.50
  -6  -4   4  712.23   23.20
   6  -4  -4  689.23   22.60
   6  -4  -4  672.13   22.50
   6   4   4  746.13   24.10
   6   6  -4  386.96   14.90
  -6   6   4  358.96   16.50
   6  -6   4  343.07   12.40
  -6  -6  -4  386.06   15.50
   6  -6   4  369.36   16.90
  -6  -6  -4  403.76   14.10
  -6  -6  -4  390.16   15.30
   6   6  -4  384.16   16.50
   6  -6   4  358.56   11.40
  -6   6   4  381.66   14.20
  -6   6   4  351.86   14.60
  -6   6  -4  381.86   11.50
   6  -6  -4  408.26   16.40
   6   6   4  366.46   15.80
   6  -6  -4  371.86   16.30
   6   6   4  370.26   17.20
  -6   6  -4  377.66   12.70
   6  -6  -4  390.36   14.20
  -6  -6   4  369.26   16.90
   6   6   4  377.76   13.90
  -6   6  -4  374.56   16.80
  -6  -6   4  328.87   14.20
   6  -6  -4  374.16   14.70
  -6  -8  -4  198.28   11.50
  -6   8   4  193.18   10.60
   6  -8   4  195.58   12.90
   6   8  -4  214.78   13.10
  -6  -8  -4  197.48    9.10
   6  -8   4  203.48    8.80
   6   8  -4  222.88   11.10
   6  -8  -4  206.58   12.30
   6   8   4  204.68   11.90
  -6  -8   4  218.38   13.60
   6  -8  -4  192.88    9.20
  -6   8  -4  201.78   13.00
   6   8   4  217.68    9.50
   6   8   4  223.88   13.90
   6  -8  -4  207.88    9.80
  -6   8  -4  217.68    9.10
  -6  10   4  224.48   12.40
   6  10  -4  237.88   15.80
  -6  10   4  216.08   15.50
   6 -10   4  255.17   16.40
  -6 -10  -4  246.18   14.50
  -6 -10  -4  223.98    9.60
   6  10  -4  236.78   12.60
  -6  10  -4  254.37   16.30
  -6 -10   4  238.08   15.80
   6  10   4  234.58    9.70
   6  10   4  242.88   16.30
   6 -10  -4  219.58    9.90
   6  10   4  225.68   13.50
  -6  10  -4  235.18   10.50
   6 -10  -4  238.68   14.90
   6 -10  -4  235.18   10.30
  -6 -12  -4   74.99   12.20
   6  12  -4   66.89    7.00
  -6 -12  -4   75.59    9.20
   6  12  -4   73.09   11.30
   6 -12   4   73.69   11.60
  -6  12   4   82.09   10.20
  -6  12   4   73.99    7.20
  -6  12  -4   73.29    5.60
   6  12   4   73.19    8.20
   6 -12  -4   82.39    9.80
  -6 -12   4   72.89    9.80
  -6  12  -4   80.79   10.30
   6 -12  -4   65.39    4.00
   6  12   4   56.89   11.40
  -6  14   4  118.09   13.30
  -6  14   4  109.39    9.70
  -6 -14  -4  131.09   12.60
  -6 -14  -4  106.09   13.50
   6  14  -4  116.69    9.70
   6 -14   4  110.09   13.00
   6  14  -4  131.19   14.00
   6 -14  -4  107.29   12.40
  -6  14  -4  145.09   15.00
  -6 -14   4  134.89   13.90
   6  14   4  117.39   11.00
   6   0   6 3107.19   84.39
  -6   0  -6 3031.60   84.09
  -6   0  -6 3054.19   81.09
   6   0  -6 2982.60   83.29
   6   0  -6 3090.09   84.29
  -6   0   6 3103.09   81.99
   6   0   6 3154.98   83.89
   6   0   6 3164.48   81.09
  -6   0   6 3101.19   84.39
   6   0  -6 2988.30   84.19
   6   0  -6 2975.70   83.89
  -6   0  -6 3121.59   84.49
  -6   0  -6 3086.49   83.59
   6   0  -6 3047.20   81.89
  -6   0   6 3142.59   83.69
   6   2  -6  891.81   28.20
   6   2  -6  869.61   27.30
   6   2  -6  913.81   26.80
  -6   2   6  884.11   30.50
  -6  -2  -6  899.01   33.50
  -6  -2  -6  972.00   29.80
  -6   2   6  899.81   28.60
   6  -2   6  886.51   28.30
   6  -2   6  925.41   27.90
  -6  -2  -6  928.41   28.60
  -6   2   6  902.71   28.70
   6   2  -6  851.51   28.20
  -6  -2  -6  939.61   24.60
  -6  -2  -6  926.81   24.60
   6   2   6  917.91   28.70
   6  -2  -6  923.91   28.80
  -6   2  -6  892.21   27.40
   6  -2  -6  911.51   27.70
   6   2   6  914.61   29.10
   6  -2  -6  907.01   28.50
  -6   2  -6  896.71   27.70
  -6   2  -6  935.71   27.30
   6  -2  -6  877.21   27.40
   6  -2  -6  868.61   27.60
  -6  -2   6  877.31   27.60
   6   2   6  914.61   28.80
  -6   2  -6  947.51   28.90
  -6   2  -6  979.00   30.70
  -6  -2   6  867.51   26.50
  -6  -2   6  865.71   27.90
   6  -2  -6  913.31   28.50
  -6  -2   6  899.31   28.60
  -6  -4  -6 2289.87   63.19
  -6   4   6 2450.95   65.69
  -6   4   6 2380.56   66.09
   6  -4   6 2301.77   63.69
   6   4  -6 2378.66   63.39
   6   4  -6 2377.76   65.69
   6   4  -6 2347.07   65.29
   6  -4   6 2271.97   66.39
  -6  -4  -6 2222.98   66.19
  -6  -4  -6 2287.77   67.79
  -6  -4  -6 2311.37   62.99
  -6  -4  -6 2229.28   65.29
   6  -4   6 2358.36   66.79
   6  -4   6 2263.97   63.39
  -6   4   6 2433.16   66.09
  -6  -4  -6 2306.17   67.79
   6   4  -6 2257.47   66.79
  -6  -4   6 2364.26   65.19
   6   4   6 2241.48   65.49
  -6  -4   6 2177.78   66.59
  -6  -4   6 2359.06   67.29
  -6   4  -6 2286.87   63.39
   6  -4  -6 2379.76   65.59
   6  -4  -6 2347.36   68.79
  -6   4  -6 2266.87   63.69
  -6   4  -6 2236.38   63.19
  -6   4  -6 2311.77   66.79
   6  -4  -6 2389.06   65.89
  -6   4  -6 2152.18   65.89
   6  -4  -6 2332.47   65.69
   6  -4  -6 2388.46   66.79
  -6  -4   6 2417.56   64.19
   6   4   6 2272.97   66.59
   6  -6   6  611.24   18.80
   6   6  -6  610.54   18.20
   6   6  -6  595.74   23.10
  -6   6   6  606.14   21.80
  -6   6   6  638.24   22.60
   6  -6   6  581.64   19.40
   6  -6   6  635.64   24.50
  -6  -6  -6  589.34   21.30
   6   6  -6  610.84   18.20
  -6  -6  -6  602.84   24.80
  -6   6   6  609.14   24.00
  -6  -6  -6  560.24   20.90
   6   6  -6  599.24   21.50
  -6  -6  -6  640.94   21.40
  -6   6  -6  604.44   18.80
  -6  -6   6  551.74   21.00
  -6   6  -6  601.74   19.40
   6   6   6  604.94   23.20
  -6  -6   6  603.74   24.20
   6  -6  -6  614.94   24.70
   6  -6  -6  623.44   22.70
  -6   6  -6  602.14   23.90
   6  -6  -6  591.64   21.40
   6   6   6  613.54   21.60
  -6   8   6  464.85   21.90
   6   8  -6  459.35   18.60
   6  -8   6  440.76   16.10
  -6  -8  -6  470.95   22.90
   6  -8   6  500.05   22.60
  -6  -8  -6  471.85   19.40
  -6   8   6  474.25   19.60
   6  -8   6  473.75   13.00
  -6   8   6  420.26   17.80
   6   8  -6  452.55   23.70
  -6  -8  -6  446.76   17.60
  -6  -8   6  441.26   21.80
   6   8   6  453.25   20.40
   6   8   6  489.05   18.30
   6  -8  -6  453.35   20.30
  -6   8  -6  486.25   22.10
  -6   8  -6  491.15   16.60
  -6  10   6   36.60    5.90
   6  10  -6   46.00    8.00
  -6 -10  -6   45.60    6.10
  -6 -10  -6   45.50    8.80
   6 -10   6   31.60    4.50
   6  10  -6   41.70    5.10
   6 -10   6   38.20    7.40
  -6  10   6   38.40    7.80
  -6  10  -6   39.40    4.10
  -6  10  -6   45.10    8.20
   6  10   6   31.90    4.10
   6 -10  -6   49.20    6.70
   6  10   6   42.70    7.40
   6 -10  -6   46.40    5.00
  -6 -10   6   37.70    7.50
  -6 -12  -6   18.70    6.50
   6  12  -6   13.00    4.10
  -6 -12  -6   11.80    2.90
   6 -12   6    6.80    4.10
  -6  12   6   13.00    4.00
   6  12  -6   17.10    5.70
  -6 -12  -6   12.00    4.00
   6  12   6   18.60    4.90
   6 -12  -6   13.90    5.50
  -6 -12   6   13.50    5.40
   6 -12  -6   11.80    3.00
  -6  12  -6    6.80    4.70
  -6  12  -6   10.90    2.80
   6  14  -6    9.30    5.10
   6 -14   6   -2.20    3.50
  -6  14   6    6.60    3.90
  -6 -14  -6   11.40    6.00
   6  14  -6   11.90    4.50
  -6  14   6   18.90    6.40
  -6 -14  -6    4.90    4.20
   6 -14  -6    5.80    5.10
  -6  14  -6    3.20    4.10
   6  14   6    5.60    4.40
  -6 -14   6    5.10    4.30
   6 -14  -6    5.30    4.40
   6   0  -8    2.10    1.80
  -6   0  -8    2.30    1.30
  -6   0   8    0.30    1.50
  -6   0  -8    5.40    1.20
   6   0   8    4.50    1.30
   6   0   8    0.20    1.40
   6   0  -8    2.10    1.30
   6   0   8   12.00    2.90
  -6   0  -8   -0.50    0.90
  -6   0   8    4.40    1.50
   6   0  -8    1.90    1.50
   6   0   8    0.60    0.90
  -6   0   8    0.60    1.10
   6   0  -8    2.80    1.60
   6   0  -8    2.30    1.10
  -6   0  -8    0.50    1.20
   6  -2   8 1318.57   39.30
   6  -2   8 1314.77   38.00
   6   2  -8 1318.87   38.90
  -6  -2  -8 1164.98   36.60
  -6   2   8 1276.97   40.10
   6   2  -8 1326.87   37.60
  -6  -2  -8 1271.47   40.30
  -6  -2  -8 1284.37   41.40
   6   2  -8 1321.67   39.60
   6  -2   8 1303.97   39.40
   6   2  -8 1260.27   39.20
  -6   2   8 1265.97   37.80
  -6  -2  -8 1219.68   39.50
   6  -2  -8 1247.68   38.50
  -6   2  -8 1325.67   38.60
   6  -2  -8 1301.67   40.80
  -6  -2   8 1281.17   39.30
  -6   2  -8 1300.57   39.10
   6   2   8 1277.87   34.60
   6  -2  -8 1299.67   40.70
  -6   2  -8 1250.17   37.70
   6  -2  -8 1261.27   40.00
  -6  -2   8 1315.17   37.50
   6   2   8 1194.48   39.50
  -6   2  -8 1331.47   40.30
  -6  -2   8 1314.27   39.20
   6   2   8 1287.57   40.00
   6   2   8 1191.58   39.50
  -6  -2   8 1347.77   39.60
  -6   2  -8 1306.57   39.80
   6  -2  -8 1204.18   37.70
   6  -2  -8 1282.97   38.50
  -6  -4  -8  496.85   15.70
   6  -4   8  510.85   19.50
  -6   4   8  456.45   19.00
  -6   4   8  466.45   19.10
   6   4  -8  470.15   17.20
  -6  -4  -8  493.85   20.50
  -6  -4  -8  488.25   15.60
   6  -4   8  506.05   17.80
   6   4  -8  480.65   18.50
  -6   4   8  473.15   17.80
   6   4  -8  478.55   18.10
   6  -4  -8  450.65   18.70
  -6  -4   8  468.75   17.70
  -6   4  -8  501.25   17.30
  -6   4  -8  495.95   19.60
  -6  -4   8  496.65   17.60
   6  -4  -8  479.45   19.20
  -6   4  -8  506.95   17.40
   6  -4  -8  460.85   17.80
   6   4   8  499.85   19.40
  -6   4  -8  474.05   19.00
  -6  -4   8  492.55   19.80
  -6   4  -8  478.15   18.80
   6   4   8  496.05   19.80
  -6  -4   8  472.65   18.30
  -6   6   8  431.26   18.60
   6  -6   8  458.15   20.40
   6   6  -8  484.05   18.50
   6  -6   8  438.66   15.90
  -6  -6  -8  484.95   21.50
  -6  -6  -8  461.75   16.60
   6   6  -8  460.05   19.20
   6  -6   8  433.86   16.40
  -6  -6  -8  452.05   16.80
  -6   6   8  416.26   18.80
   6   6  -8  437.46   15.60
  -6  -6   8  464.95   20.60
   6   6   8  441.56   19.70
   6   6   8  436.46   18.50
   6  -6  -8  466.45   20.50
  -6   6  -8  455.05   16.40
  -6   6  -8  471.25   20.40
  -6  -6   8  456.65   15.90
  -6   6  -8  433.06   16.30
  -6   6  -8  444.96   16.00
   6  -6  -8  453.55   18.40
   6   8  -8  949.51   26.90
   6   8  -8  993.20   33.00
   6   8  -8 1000.60   36.00
   6  -8   8  956.60   28.10
   6   8  -8  967.00   26.90
  -6   8   8  961.60   33.40
  -6  -8  -8  960.00   37.80
   6  -8   8  867.81   29.90
  -6  -8  -8  963.30   32.60
   6  -8   8  983.40   37.30
  -6   8  -8  967.00   28.10
   6  -8  -8  954.60   34.20
  -6  -8   8  953.10   37.10
   6   8   8  969.50   33.20
   6   8   8  915.11   35.10
  -6   8  -8  982.50   30.30
  -6   8  -8 1000.90   37.10
   6  -8  -8  981.50   37.30
   6 -10   8  174.08    9.60
   6  10  -8  223.28   12.40
   6 -10   8  208.78   15.40
  -6 -10  -8  182.08   12.10
  -6 -10  -8  191.28   15.50
   6  10  -8  232.48   15.40
  -6  10   8  223.58   13.80
   6 -10  -8  199.68   12.20
   6  10   8  193.18   13.70
   6  10   8  190.68   11.40
  -6 -10   8  254.47   16.90
  -6  10  -8  203.68   15.10
   6 -10  -8  229.28   16.60
   6 -10  -8  208.98   13.70
  -6  10  -8  206.78   10.00
  -6 -12  -8   79.99    8.90
   6 -12   8   88.99   11.00
   6  12  -8   88.59   19.00
  -6 -12  -8   95.29   12.00
   6  12  -8   93.09    8.40
  -6  12   8   83.79    9.00
  -6 -12  -8   77.99    7.20
  -6 -12   8  115.59   12.40
   6 -12  -8  108.89   12.60
  -6  12  -8   82.69    6.20
   6 -12  -8   82.49    7.70
   6  12   8   93.79   10.00
  -6  12  -8  106.39   11.90
   6 -12  -8   93.29   10.20
  -6   0  10 1422.16   44.10
   6   0  10 1384.76   43.30
  -6   0  10 1398.76   41.80
   6   0 -10 1326.77   43.30
  -6   0 -10 1323.97   39.10
   6   0 -10 1463.85   41.20
   6   0  10 1353.96   39.10
   6   0 -10 1487.65   44.40
   6   0  10 1362.76   43.70
  -6   0 -10 1346.57   43.00
  -6   0 -10 1376.46   43.30
  -6   0  10 1374.36   40.80
   6   0  10 1328.57   43.00
  -6  -2 -10  965.80   27.70
   6   2 -10 1017.60   33.40
   6   2 -10  893.61   32.00
   6  -2  10  989.80   31.10
  -6  -2 -10  980.40   33.90
  -6   2  10 1009.50   31.20
   6  -2  10 1005.80   33.10
   6   2 -10  942.31   30.70
  -6   2  10 1045.50   34.50
  -6  -2  10  978.60   30.90
   6  -2 -10 1009.00   34.30
   6   2  10  992.70   33.90
  -6   2 -10  994.10   33.30
   6   2  10 1040.20   27.80
  -6  -2  10 1000.90   33.00
  -6  -2  10 1026.70   32.90
  -6   2 -10  936.91   30.90
  -6   2 -10  993.70   32.40
   6   2  10  997.10   33.70
   6  -2 -10 1010.00   32.10
   6  -2 -10  963.70   31.10
   6   4 -10  202.18   10.60
  -6  -4 -10  198.38   12.50
   6   4 -10  205.38   11.20
  -6   4  10  204.08   10.00
   6  -4  10  201.58   11.20
  -6   4  10  195.88   11.70
  -6   4  10  198.78   11.80
  -6  -4 -10  202.68    7.70
   6  -4  10  184.48   10.20
  -6  -4 -10  181.78    7.60
   6  -4 -10  215.68   11.70
  -6  -4  10  192.08   10.20
   6   4  10  205.18   12.10
   6  -4 -10  193.58   10.10
  -6  -4  10  204.78   11.90
  -6   4 -10  199.08   11.60
  -6  -4  10  202.58   10.50
   6   4  10  203.88   11.80
  -6   4 -10  186.88   10.00
  -6   4 -10  194.88   10.10
  -6  -6 -10  952.90   36.20
  -6  -6 -10  927.21   29.40
   6   6 -10 1008.10   34.10
   6   6 -10  985.90   33.00
  -6   6  10  939.01   34.40
   6   6 -10  954.00   30.70
   6  -6  10  929.71   30.70
   6  -6  10  999.60   35.90
  -6   6  10  937.41   34.10
  -6  -6 -10  905.91   29.70
   6   6  10  950.60   34.10
  -6   6 -10  890.21   30.50
  -6  -6  10  979.40   30.90
   6  -6 -10  983.10   32.50
   6   6  10  948.51   35.20
  -6  -6  10 1009.30   36.20
  -6   6 -10  900.61   30.80
  -6   6 -10  989.90   31.30
   6  -6 -10  979.40   35.40
   6   8 -10  396.06   14.20
   6   8 -10  388.96   14.20
  -6   8  10  392.46   18.90
   6  -8  10  385.26   14.70
   6  -8  10  399.46   21.20
   6   8 -10  421.86   18.30
  -6  -8 -10  370.26   21.20
   6   8 -10  404.46   19.90
  -6  -8 -10  364.36   16.20
  -6   8  10  387.96   19.50
  -6   8 -10  385.66   20.60
   6   8  10  403.36   18.90
  -6   8 -10  378.86   15.80
   6  -8 -10  406.56   18.50
  -6  -8  10  427.56   21.80
   6   8  10  363.36   19.80
   6  -8 -10  421.16   21.40
   6  10 -10  323.97   16.40
  -6  10  10  320.47   18.30
  -6  10  10  332.47   17.00
   6 -10  10  316.37   20.10
   6  10 -10  317.27   19.10
  -6 -10 -10  328.47   21.10
   6 -10 -10  323.27   17.70
  -6  10 -10  324.47   19.80
   6  10  10  337.17   17.00
   6  10  10  312.17   18.90
   6 -10 -10  311.47   20.30
  -6  10 -10  333.27   14.10
   6 -10 -10  307.87   17.10
  -6 -10  10  338.47   20.70
  -6 -12 -10   99.79    9.60
   6  12 -10  110.99    9.60
  -6 -12 -10  128.59   14.30
   6  12 -10  130.39   12.70
  -6  12  10  108.79   10.80
   6 -12  10  105.49   12.40
   6  12  10  101.49    8.90
  -6  12 -10   99.39    6.80
   6 -12 -10  102.49   12.70
   6 -12 -10  108.39   10.80
   6  12  10  112.69   11.50
  -6 -12  10   89.49   11.80
  -6  12 -10   97.59   11.50
   6 -12 -10  101.29    9.60
   6   0 -12    1.40    1.50
   6   0 -12    0.90    1.40
  -6   0 -12    0.40    1.00
   6   0 -12    2.50    1.60
  -6   0  12    0.80    1.60
   6   0  12    0.10    0.90
   6   0  12    2.20    2.00
  -6   0  12    1.60    2.00
  -6   0 -12    2.20    1.60
  -6   0 -12    2.50    2.10
  -6   0  12    1.70    1.70
  -6  -2 -12  185.78   11.80
   6   2 -12  194.28   11.60
  -6   2  12  151.48   11.20
   6   2 -12  180.48    9.60
   6  -2  12  196.08    9.90
  -6  -2 -12  184.58    7.10
   6  -2  12  212.58   11.90
  -6   2  12  155.98    9.00
   6   2  12  172.88   12.90
  -6   2 -12  193.78    9.70
  -6  -2  12  163.88   10.20
  -6  -2  12  181.28    9.60
   6  -2 -12  146.79    9.60
   6  -2 -12  148.39    8.80
   6  -2 -12  171.38   10.00
  -6   2 -12  207.28   11.70
  -6  -2  12  186.88   11.30
  -6   2 -12  197.98   11.30
   6   2  12  192.28    7.00
   6  -2 -12  157.18   11.90
   6  -4  12  149.79    9.90
  -6  -4 -12  129.39    5.90
   6   4 -12  147.79   10.10
   6  -4  12  168.68   10.30
  -6   4  12  145.19   10.80
  -6  -4 -12  139.39   10.90
  -6   4  12  143.99    8.50
  -6  -4 -12  131.39    5.90
   6   4 -12  139.39    9.10
   6   4  12  134.29   10.30
   6  -4 -12  148.29   10.20
  -6  -4  12  157.38    9.90
   6   4  12  146.99   10.90
  -6  -4  12  152.58   10.50
  -6   4 -12  143.49    9.40
   6  -4 -12  135.49   10.60
   6  -4 -12  130.89    8.30
  -6   4 -12  139.79   10.10
   6  -6  12  257.67   12.80
  -6   6  12  257.17   15.40
   6   6 -12  268.27   14.70
  -6  -6 -12  250.47   10.30
  -6  -6 -12  249.38   16.20
  -6   6  12  257.27   15.30
  -6  -6 -12  233.98   10.30
   6   6 -12  250.37   14.10
   6  -6  12  247.08   14.90
  -6  -6  12  249.97   12.70
  -6   6 -12  265.97   15.40
   6   6  12  245.08   15.50
  -6   6 -12  270.07   13.20
  -6  -6  12  250.17   15.50
   6  -6 -12  276.37   15.90
   6   6  12  226.58   14.30
   6  -6 -12  259.37   13.00
  -6   8  12  126.99   11.30
   6  -8  12  124.99   11.60
  -6  -8 -12  104.19    7.70
  -6   8  12  120.19   10.40
   6   8 -12  125.39    7.80
  -6  -8 -12  108.69    7.40
   6   8 -12  112.39   10.00
  -6  -8 -12  113.99   11.50
   6  -8  12  115.09    7.60
   6   8 -12  134.59    9.80
  -6   8 -12  119.89    8.20
   6   8  12  102.09   10.50
  -6   8 -12  112.89   10.70
  -6  -8  12  134.69   12.20
   6   8  12  123.79   10.40
   6  -8 -12  130.49    9.40
   6  -8 -12  129.09   11.90
   6  10 -12   20.00    4.90
   6  10 -12   16.90    5.60
  -6 -10 -12   20.60    4.40
  -6  10  12   27.40    6.70
  -6  10  12   26.10    5.80
  -6  10 -12   24.40    4.70
   6  10  12   14.50    4.80
  -6  10 -12   24.50    6.60
   6 -10 -12   19.50    6.20
   6 -10 -12   17.50    4.70
   6  10  12   18.30    5.20
  -6 -10  12   23.60    7.10
   6  12 -12  272.77   19.40
  -6  12  12  286.37   19.00
   6 -12  12  319.97   22.00
  -6 -12 -12  268.97   16.00
   6  12 -12  303.87   16.60
  -6 -12 -12  295.07   22.10
  -6  12 -12  305.37   21.00
  -6 -12  12  334.97   22.80
   6 -12 -12  303.57   21.60
   6 -12 -12  281.97   17.50
   6  12  12  285.67   19.90
   6 -12 -12  291.97   17.80
   6  12  12  285.07   16.80
   6   0 -14 1325.97   44.70
  -6   0  14 1297.47   40.60
  -6   0  14 1291.17   44.30
  -6   0 -14 1146.69   37.20
  -6   0 -14 1244.38   42.80
   6   0 -14 1299.07   40.40
  -6   0 -14 1288.37   43.80
   6   0  14 1255.27   37.50
   6   0  14 1220.78   43.80
   6  -2  14  107.99    7.40
  -6  -2 -14   94.79    9.10
  -6   2  14  112.09    7.50
  -6  -2 -14   97.79    5.10
   6  -2  14  104.49    9.20
   6   2 -14  100.19    7.40
   6   2 -14  122.19    9.80
  -6   2  14  111.29    9.70
   6  -2 -14   93.39    8.10
  -6   2 -14   98.49    8.70
   6  -2 -14  116.69    8.50
   6   2  14  111.59    5.10
   6  -2 -14  114.89    9.90
  -6   2 -14   91.39    8.40
  -6  -2  14  111.39    9.40
   6   2  14  114.89    9.90
   6   2  14  110.39    9.60
  -6  -2  14  113.89    8.70
   6  -4  14  295.27   15.20
  -6  -4 -14  281.27    9.50
   6   4 -14  290.27   16.10
  -6   4  14  307.87   17.40
  -6  -4 -14  301.17   17.40
  -6   4  14  283.07   13.20
  -6  -4 -14  293.57    9.60
   6   4 -14  286.77   14.60
   6  -4  14  292.67   15.60
   6  -4 -14  314.37   18.10
  -6  -4  14  304.47   15.80
   6   4  14  263.87   16.50
   6  -4 -14  284.27   15.70
  -6  -4  14  280.37   15.90
  -6   4 -14  280.47   16.00
  -6   4 -14  317.07   16.00
   6   4  14  277.67   16.60
   6  -6  14  516.15   22.00
  -6   6  14  549.85   25.70
  -6  -6 -14  484.65   16.80
  -6  -6 -14  501.45   16.90
   6   6 -14  557.84   24.10
  -6  -6 -14  547.15   26.60
   6  -6  14  523.85   24.40
   6   6 -14  511.95   22.90
  -6  -6  14  577.34   25.90
   6   6  14  569.24   26.60
  -6  -6  14  544.95   24.80
   6  -6 -14  515.95   25.70
   6   6  14  530.45   25.10
  -6   6 -14  521.95   24.80
   6  -6 -14  546.55   21.40
  -6   6 -14  569.94   25.40
   6  -6 -14  541.25   25.00
   6  -8  14  156.18    9.90
   6  -8  14  168.48   13.70
   6   8 -14  164.48   11.70
  -6  -8 -14  150.48    8.20
   6   8 -14  151.68   12.30
  -6  -8 -14  150.28   13.90
  -6   8  14  125.99   12.10
   6   8 -14  135.99    9.40
  -6   8  14  162.28   13.00
   6   8  14  158.88   12.90
   6  -8 -14  147.59   13.50
  -6   8 -14  146.39   10.20
   6   8  14  147.39   13.30
  -6  -8  14  163.98   14.10
   6  -8 -14  153.68   11.00
   6  -8 -14  168.78   13.70
  -6   8 -14  156.98   13.20
  -6  10  14    4.00    3.60
  -6 -10 -14   -0.50    2.10
   6  10 -14    5.10    3.60
  -6  10  14    0.60    3.40
   6 -10  14   -2.50    3.60
   6 -10  14   -1.30    2.10
   6  10 -14   -0.50    2.40
  -6 -10 -14   -2.00    3.10
   6  10  14    6.10    3.60
  -6 -10  14    1.80    3.70
  -6  10 -14    0.90    3.30
  -6  10 -14    0.10    2.50
   6  10  14   -4.10    2.70
   6 -10 -14    1.20    2.80
   6 -10 -14    0.10    3.40
   6 -10 -14   -1.60    3.40
  -6   0 -16    6.90    3.40
   6   0 -16    4.70    2.70
   6   0 -16    1.90    1.80
  -6   0 -16    1.40    2.10
   6   0  16    5.10    3.10
  -6   0  16    3.80    2.20
   6   0  16    3.50    1.60
  -6   0  16    7.40    3.60
   6   2 -16  298.87   17.50
   6  -2  16  302.07   14.10
  -6  -2 -16  288.67   16.90
   6  -2  16  294.97   17.10
   6   2 -16  285.77   14.50
  -6  -2 -16  297.27   17.80
  -6   2  16  305.67   13.90
  -6  -2 -16  256.77   10.00
  -6   2  16  300.07   18.00
   6  -2 -16  291.37   17.80
   6   2  16  307.47   10.20
   6   2  16  309.77   18.30
  -6   2 -16  277.37   16.20
   6  -2 -16  302.77   15.40
  -6   2 -16  294.47   16.80
  -6  -2  16  298.77   17.20
  -6  -2  16  295.97   17.50
  -6  -4 -16   35.80    7.20
   6   4 -16   35.50    6.10
   6   4 -16   24.20    5.50
  -6   4  16   27.10    4.40
  -6  -4 -16   21.80    5.70
   6  -4  16   23.40    5.40
  -6   4  16   24.70    6.10
   6  -4  16   27.10    5.30
  -6   4 -16   32.40    6.80
  -6  -4  16   27.50    6.20
  -6   4 -16   33.10    6.60
   6   4  16   22.50    5.70
   6   4  16   22.90    5.80
   6  -4 -16   26.40    5.80
   6  -4 -16   24.50    6.60
  -6  -4  16   21.40    5.00
   6  -6  16  356.06   18.30
  -6  -6 -16  358.16   21.70
   6   6 -16  352.46   18.40
  -6   6  16  358.26   21.10
   6  -6  16  363.36   19.60
   6   6 -16  360.06   19.50
  -6  -6  16  374.56   20.80
  -6  -6  16  355.96   18.30
   6   6  16  381.96   21.50
   6  -6 -16  333.77   15.80
   6  -6 -16  366.76   22.10
   6  -6 -16  365.66   20.60
  -6   6 -16  353.96   20.00
  -6   6 -16  348.87   18.10
   6   6  16  365.46   21.50
   6   8 -16  222.58   15.50
   6  -8  16  238.48   17.00
  -6  -8 -16  232.28   20.30
   6   8 -16  237.98   15.40
   6  -8  16  233.18   13.60
  -6   8  16  240.98   17.30
   6   8 -16  244.98   13.80
  -6  -8  16  240.98   20.00
  -6   8 -16  247.78   14.50
   6  -8 -16  256.57   18.00
  -6   8 -16  242.58   17.30
   6   8  16  261.87   17.90
   6   8  16  243.18   18.10
   6  -8 -16  271.17   19.10
  -6   0 -18  436.46   21.70
  -6   0  18  387.96   22.20
   6   0 -18  431.26   23.00
  -6   0 -18  404.16   22.20
   6   0  18  424.56   23.00
   6   0  18  404.26   15.40
  -6   0  18  413.16   18.50
  -6  -2 -18    7.90    4.30
  -6   2  18   15.70    3.80
  -6   2  18   14.60    5.10
   6  -2  18    5.90    3.70
   6   2 -18    7.40    4.00
   6   2 -18    2.80    2.80
   6  -2  18    4.80    2.70
  -6  -2 -18   13.10    4.60
   6   2  18   12.10    4.90
   6  -2 -18   13.30    3.90
  -6  -2  18   10.10    4.30
  -6   2 -18    5.90    3.40
  -6   2 -18    4.90    3.70
  -6  -2  18    8.60    3.70
   6  -2 -18   10.30    4.50
  -6  -4 -18   99.09   10.90
   6  -4  18   98.39   10.20
  -6   4  18   93.99    7.30
  -6   4  18   91.09   10.60
   6  -4  18  104.09    9.20
   6   4 -18   97.39    8.90
   6   4 -18   99.49   10.50
  -6  -4 -18   98.39   10.90
  -6  -4  18   96.79    9.50
  -6   4 -18   85.99    9.40
   6  -4 -18  106.19   11.40
   6   4  18   97.09   10.80
  -6   4 -18   94.79    9.70
  -6  -4  18  105.49   10.30
   6  -4 -18   89.09    9.20
   6   6 -18  319.77   18.00
   6   6 -18  311.87   19.10
  -6  -6 -18  355.06   22.40
  -6   6  18  342.07   21.70
  -6  -6 -18  325.57   22.10
   6  -6  18  337.07   18.60
   6  -6  18  332.47   19.10
  -6   6 -18  345.47   18.80
  -6  -6  18  338.67   20.20
  -6   6 -18  333.67   19.90
   6  -6 -18  318.07   19.70
   6   6  18  331.57   21.30
  -6  -6  18  337.67   18.40
   6  -6 -18  304.87   14.80
   6  -6 -18  317.67   21.60
   6  -8  18   76.39    8.50
  -6  -8 -18   90.09   13.70
   6  -8  18  101.09   11.20
   6   8 -18   92.79   11.00
   6   8 -18   92.09    9.90
  -6  -8 -18   76.69   12.60
  -6   8  18   87.99   10.90
   6   8 -18   87.39    9.10
   6   8  18   95.09   11.40
   6   8  18   85.09   10.90
   6  -8 -18   75.39   12.30
  -6   8 -18   91.09   10.70
  -6   8 -18   96.59    9.60
  -6  -8  18   95.49   11.50
   6  -8 -18   83.79   10.80
  -6   0  20   -0.10    3.20
   6   0  20   -1.60    1.90
  -6   0  20   -0.80    2.40
  -6   0 -20    0.50    2.90
   6   0  20    3.20    3.60
   6   0 -20   -1.00    2.40
   6   0 -20    1.10    3.50
  -6   0 -20    1.50    2.90
   6  -2  20   75.29    9.90
  -6  -2 -20   67.89   10.20
   6  -2  20   67.29    6.50
   6   2 -20   52.69    7.60
  -6   2  20   63.79   10.80
  -6   2  20   64.49    6.60
   6   2 -20   66.69   10.80
  -6  -2 -20   62.19   10.50
  -6  -2  20   61.69    8.60
  -6   2 -20   60.39    9.90
   6  -2 -20   58.99   10.50
   6   2  20   51.59    9.60
   6  -2 -20   56.29    7.30
  -6   2 -20   52.89    8.50
  -6  -2  20   65.29    7.50
   6  -4  20   19.20    5.80
   6  -4  20   27.60    5.70
   6   4 -20   14.00    5.50
  -6   4  20   28.70    6.90
  -6  -4 -20   21.10    7.40
   6   4 -20   11.80    4.50
  -6   4  20   17.90    4.20
   6   4  20   23.70    7.40
  -6  -4  20   17.00    5.70
  -6   4 -20   22.50    6.10
  -6   4 -20   11.90    4.20
   6  -4 -20   20.30    6.70
  -6  -4  20   11.60    4.80
   6  -4 -20   15.70    5.30
   7   1  -1  105.09    4.50
   7  -1   1  115.39    4.60
  -7   1   1  107.39    4.40
   7  -1   1  119.99    4.70
   7  -1   1  118.19    4.50
  -7   1   1  113.99    4.20
   7  -1   1  110.29    3.40
  -7   1   1  109.29    4.40
   7   1  -1  106.09    4.10
  -7  -1  -1   96.49    4.30
  -7   1   1  117.09    4.80
   7   1  -1  103.79    4.60
  -7  -1  -1   98.59    3.90
  -7  -1  -1   90.79    4.50
   7   1  -1  109.89    4.20
   7   1   1  105.59    4.70
  -7   1  -1  101.39    4.50
   7   1   1  101.29    4.70
   7  -1  -1  104.59    4.40
   7  -1  -1  107.29    4.00
  -7  -1   1  115.49    4.80
  -7  -1   1  113.29    4.10
   7   1   1  107.29    4.00
  -7   1  -1  101.19    4.30
  -7   1  -1  102.49    3.40
  -7  -1   1  107.09    4.20
   7  -1  -1  107.89    4.70
  -7   1  -1  105.29    4.60
  -7  -1   1  112.09    4.60
   7   1   1  108.09    4.40
   7  -1  -1  102.29    4.40
   7  -3   1 9620.84  257.27
   7   3  -1 9641.24  261.77
  -7  -3  -1 9317.77  261.07
   7   3  -1 9599.44  251.37
   7   3  -1 9383.76  260.47
  -7  -3  -1 9560.14  247.88
  -7  -3  -1 9670.13  263.17
   7  -3   1 9879.41  262.37
   7  -3   1 9246.47  257.07
  -7   3   1 9822.32  262.47
  -7   3   1 9381.26  256.97
  -7   3   1 9142.39  255.97
   7   3   1 9374.36  260.97
  -7   3  -1 9571.04  261.77
  -7  -3   1 9999.00  262.97
   7   3   1 9416.06  261.87
  -7   3  -1 9288.27  256.77
   7  -3  -1 9665.13  257.07
  -7  -3   1 9489.45  251.37
   7   3   1 9272.67  247.58
  -7  -3   1 9923.61  261.37
  -7   3  -1 9500.05  257.47
   7  -3  -1 9925.21  262.57
   7  -3  -1 9319.37  256.77
   7  -5   1 1504.05   41.20
   7  -5   1 1537.85   40.90
  -7  -5  -1 1489.15   41.10
   7   5  -1 1524.75   45.60
  -7   5   1 1513.85   42.10
  -7   5   1 1576.04   45.90
   7   5  -1 1503.85   44.00
   7  -5   1 1497.55   45.60
   7   5  -1 1428.46   44.70
  -7  -5  -1 1448.46   44.20
  -7  -5  -1 1533.55   44.80
   7  -5   1 1494.95   45.60
   7   5  -1 1523.45   39.50
   7  -5   1 1466.85   45.80
  -7  -5  -1 1510.55   45.80
   7  -5   1 1557.04   40.80
   7  -5  -1 1507.95   45.70
  -7  -5   1 1513.45   39.50
   7  -5  -1 1493.65   45.50
   7   5   1 1469.15   44.40
   7   5   1 1470.15   44.50
  -7   5  -1 1427.06   45.20
  -7   5  -1 1511.75   45.80
   7  -5  -1 1491.85   41.60
  -7  -5   1 1546.05   45.60
   7   5   1 1521.05   46.10
   7  -5  -1 1547.85   41.70
   7  -5  -1 1533.05   45.50
  -7  -5   1 1502.75   43.90
   7   5   1 1550.14   41.10
  -7  -5   1 1514.25   45.30
  -7   5  -1 1488.85   41.20
   7  -5  -1 1510.65   42.20
   7  -7   1  230.98    9.00
  -7   7   1  209.48   12.40
   7   7  -1  221.98   10.90
  -7  -7  -1  231.18   12.00
   7  -7   1  222.28    7.10
   7   7  -1  210.28   12.40
  -7  -7  -1  209.48    7.50
   7  -7   1  227.58   12.60
  -7   7   1  212.78    9.40
   7   7   1  229.48    7.50
  -7  -7   1  224.78   12.40
   7  -7  -1  209.88    8.20
   7  -7  -1  216.48    8.20
  -7   7  -1  239.78   13.00
  -7   7  -1  227.18    9.10
  -7  -7   1  217.68   10.80
   7   7   1  202.08   12.40
   7  -7  -1  196.28    9.30
   7   7   1  231.88   11.50
   7  -7  -1  205.48   11.90
  -7   9   1   26.80    3.50
   7  -9   1   27.60    5.80
   7   9  -1   26.00    5.50
   7   9  -1   25.30    4.50
  -7   9   1   30.20    6.20
   7  -9   1   27.80    3.40
  -7  -9  -1   34.50    6.30
  -7  -9   1   30.60    5.90
   7   9   1   26.60    6.10
   7  -9  -1   25.00    2.00
   7  -9  -1   24.40    2.10
  -7   9  -1   32.40    6.50
  -7   9  -1   25.80    3.20
   7  -9  -1   24.30    5.10
   7  -9  -1   31.60    4.50
   7   9   1   21.10    4.50
  -7 -11  -1  681.73   29.50
   7  11  -1  654.13   28.70
   7 -11   1  679.43   30.30
   7 -11   1  600.24   22.40
  -7  11   1  665.43   23.70
   7  11  -1  629.74   30.30
  -7  11   1  661.43   30.60
  -7 -11   1  653.43   29.50
   7 -11  -1  693.03   30.20
   7  11   1  664.43   31.10
   7  11   1  648.94   26.20
  -7  11  -1  648.74   22.70
  -7  11  -1  656.13   30.50
   7  13  -1  168.28   11.90
  -7  13   1  167.88   15.60
  -7  13   1  162.58   10.20
   7 -13   1  159.88   14.60
   7  13  -1  161.68   15.20
   7  13   1  175.38   12.20
   7  13   1  149.79   14.90
  -7 -13   1  174.18   14.90
   7 -13  -1  171.98   14.90
  -7  13  -1  171.48    9.40
  -7  13  -1  183.28   15.90
  -7  -1  -3 6731.03  178.38
  -7  -1  -3 6400.66  171.28
   7  -1   3 6548.35  176.28
   7   1  -3 6585.64  175.18
  -7  -1  -3 6576.34  176.18
  -7   1   3 6249.97  173.48
  -7   1   3 6191.78  174.08
  -7  -1  -3 6582.04  177.68
   7  -1   3 6252.57  175.08
   7   1  -3 6463.55  173.68
  -7   1   3 6171.18  174.88
   7   1  -3 6472.95  176.18
   7  -1   3 6398.46  174.38
   7  -1  -3 6416.56  175.08
   7   1   3 6535.85  175.98
  -7  -1   3 6500.75  173.58
   7  -1  -3 6548.54  174.68
  -7   1  -3 6577.64  176.48
  -7  -1   3 6374.16  176.08
  -7  -1   3 6157.08  174.58
   7   1   3 6285.67  171.08
   7  -1  -3 6571.74  173.88
  -7   1  -3 6570.64  175.48
  -7   1  -3 6736.53  174.98
  -7  -3  -3 3269.57   89.49
  -7  -3  -3 3385.16   88.89
   7  -3   3 3444.36   91.19
   7   3  -3 3345.77   88.19
  -7  -3  -3 3314.37   91.89
  -7   3   3 3259.37   89.49
  -7   3   3 3371.76   89.89
   7  -3   3 3401.16   91.09
   7   3  -3 3322.27   88.19
  -7  -3  -3 3416.16   90.89
   7   3  -3 3295.57   89.99
   7   3  -3 3212.48   90.99
  -7   3   3 3401.86   90.69
  -7  -3  -3 3385.66   91.99
   7   3   3 3360.06   89.69
   7  -3  -3 3215.08   90.29
   7   3   3 3267.87   90.89
  -7   3  -3 3459.55   87.49
  -7   3  -3 3337.37   91.19
   7  -3  -3 3409.16   89.59
  -7   3  -3 3416.86   88.69
   7  -3  -3 3371.76   90.59
   7   3   3 3375.76   88.89
  -7  -3   3 3339.17   91.29
   7  -3  -3 3263.67   89.69
  -7  -3   3 3403.96   89.99
  -7  -3   3 3303.07   90.09
  -7   3  -3 3366.86   90.99
   7  -5   3  300.17   10.40
   7   5  -3  347.67   13.20
   7  -5   3  305.67   14.00
  -7   5   3  348.07   14.50
   7   5  -3  353.56    9.60
  -7  -5  -3  323.97   11.80
  -7  -5  -3  305.27   14.50
  -7  -5  -3  315.57   13.50
   7  -5   3  324.97   14.40
   7   5  -3  324.07   14.20
  -7   5   3  329.97   12.40
   7   5  -3  343.07    9.50
   7   5  -3  344.17   14.20
  -7  -5  -3  333.37   13.10
   7  -5   3  310.97   10.40
  -7  -5   3  314.87   12.70
   7  -5  -3  348.17   12.40
   7   5   3  310.67   14.50
   7  -5  -3  367.96   12.50
   7  -5  -3  360.36   14.30
  -7   5  -3  326.77   14.30
   7   5   3  306.57   12.70
  -7   5  -3  305.87   14.20
  -7   5  -3  319.37   10.40
  -7  -5   3  314.67   13.50
  -7   5  -3  326.37   10.60
   7  -5  -3  334.97   14.20
  -7  -5   3  311.87   14.20
   7   5   3  316.17   13.60
   7   5   3  305.37   11.70
   7  -5  -3  336.97   12.40
   7  -5  -3  349.77   14.30
   7   7  -3  425.06   16.50
   7  -7   3  397.26   13.60
   7   7  -3  450.55   19.00
   7  -7   3  402.56   11.30
  -7  -7  -3  395.86   14.10
   7  -7   3  408.06   18.70
  -7   7   3  390.56   18.40
   7  -7   3  420.26   11.40
  -7   7   3  398.26   15.60
  -7  -7  -3  433.06   17.50
   7   7   3  394.56   18.90
   7  -7  -3  399.86   15.60
   7  -7  -3  394.96   17.80
  -7  -7   3  374.76   15.80
  -7  -7   3  416.16   18.80
  -7   7  -3  417.26   13.90
  -7   7  -3  410.76   18.70
   7   7   3  432.76   17.70
   7  -7  -3  402.26   14.70
   7  -7  -3  403.96   14.50
  -7   9   3  396.96   16.60
   7  -9   3  416.16   20.90
  -7   9   3  400.06   20.60
  -7  -9  -3  426.46   19.40
  -7  -9  -3  402.46   13.90
   7   9  -3  428.06   20.90
   7  -9   3  385.66   14.40
   7   9  -3  427.96   17.90
  -7  -9   3  413.86   20.70
   7   9   3  395.06   20.80
  -7   9  -3  425.56   14.90
   7  -9  -3  401.36   14.60
   7  -9  -3  417.46   20.00
   7  -9  -3  391.96   14.40
   7   9   3  403.16   18.40
   7   9   3  391.76   13.80
  -7   9  -3  450.35   21.50
  -7  11   3  354.26   21.10
   7 -11   3  343.97   20.60
   7  11  -3  383.36   21.40
  -7  11   3  353.66   16.10
   7  11  -3  371.86   19.50
  -7 -11  -3  370.26   19.80
   7 -11   3  344.67   13.90
   7  11   3  367.66   21.80
  -7  11  -3  366.76   21.30
   7 -11  -3  348.87   12.20
   7  11   3  390.26   18.70
   7 -11  -3  372.16   20.60
  -7  11  -3  372.26   14.20
   7 -11  -3  337.67   11.90
  -7 -11   3  355.16   20.60
   7  13  -3   30.30    7.80
  -7  13   3   38.40    8.70
  -7 -13  -3   37.10    7.60
  -7  13   3   32.80    5.80
   7  13  -3   26.60    5.10
   7 -13   3   23.40    7.50
   7 -13  -3   23.90    6.70
  -7  13  -3   31.10    7.90
  -7  13  -3   29.10    4.10
   7  13   3   25.90    5.30
   7  13   3   30.90    8.00
  -7 -13   3   31.70    7.20
   7   1  -5 1316.47   38.20
  -7  -1  -5 1252.77   38.50
   7   1  -5 1286.87   38.50
  -7   1   5 1414.66   39.20
  -7  -1  -5 1288.27   38.30
   7  -1   5 1399.36   37.80
  -7   1   5 1355.66   38.20
   7   1  -5 1287.27   36.30
   7  -1   5 1369.96   38.90
   7  -1   5 1412.16   37.30
   7  -1   5 1358.86   38.60
   7   1  -5 1315.67   38.60
  -7  -1  -5 1343.67   39.40
   7  -1  -5 1310.47   36.90
   7  -1  -5 1293.27   38.60
  -7   1  -5 1306.17   38.90
  -7   1  -5 1340.57   37.60
   7   1   5 1368.16   39.20
  -7   1  -5 1333.47   37.10
   7   1   5 1401.96   38.80
   7  -1  -5 1352.46   38.90
   7   1   5 1360.96   39.00
   7  -1  -5 1299.27   38.60
  -7   1  -5 1266.57   38.30
   7  -1  -5 1249.28   37.90
   7  -1  -5 1299.67   37.10
  -7  -1   5 1375.66   36.50
  -7  -1   5 1370.76   38.60
  -7  -3  -5 1198.68   35.60
   7   3  -5 1239.48   35.70
   7  -3   5 1103.99   35.70
   7  -3   5 1152.58   34.40
   7   3  -5 1259.47   35.20
  -7  -3  -5 1218.28   37.50
  -7   3   5 1207.68   35.90
  -7  -3  -5 1224.08   37.50
  -7  -3  -5 1199.38   33.10
  -7   3   5 1206.28   35.70
   7  -3   5 1110.19   35.80
  -7  -3  -5 1212.68   33.00
   7   3  -5 1236.78   34.20
  -7   3   5 1209.68   35.50
  -7   3   5 1202.08   35.70
   7   3  -5 1202.18   36.70
  -7  -3   5 1226.38   34.30
  -7  -3   5 1150.28   35.30
  -7   3  -5 1218.58   33.70
  -7  -3   5 1208.08   34.70
   7  -3  -5 1204.88   35.50
   7  -3  -5 1235.68   35.70
  -7  -3   5 1191.58   36.60
   7  -3  -5 1263.47   36.00
  -7   3  -5 1179.78   33.50
  -7   3  -5 1177.98   34.40
   7   3   5 1122.09   36.10
  -7   3  -5 1182.28   36.50
   7   3   5 1113.39   36.70
  -7   3  -5 1131.49   35.60
   7  -3  -5 1220.38   35.70
   7   3   5 1161.48   35.50
   7  -5   5  328.37   11.30
   7  -5   5  362.86   15.50
  -7  -5  -5  348.77   13.00
   7   5  -5  322.17   10.80
   7   5  -5  325.57   10.90
  -7   5   5  304.07   13.20
   7   5  -5  339.77   13.50
  -7   5   5  304.87   13.00
  -7  -5  -5  324.07   13.00
  -7   5   5  315.07   13.80
  -7  -5  -5  329.47   15.60
  -7   5   5  311.47   14.30
   7   5  -5  333.07   14.20
  -7  -5  -5  338.97   12.70
   7  -5   5  330.67   11.40
  -7   5  -5  347.67   11.40
  -7   5  -5  343.67   11.50
   7  -5  -5  303.57   14.20
  -7  -5   5  332.97   15.10
   7  -5  -5  325.67   13.90
  -7   5  -5  340.57   15.00
   7   5   5  339.37   13.20
   7  -5  -5  313.67   13.80
  -7  -5   5  312.67   13.60
   7   5   5  335.17   14.60
  -7  -5   5  292.37   12.80
   7  -5  -5  309.57   13.10
  -7  -7  -5  277.17   13.10
  -7  -7  -5  268.37   15.30
  -7   7   5  281.77   12.30
  -7   7   5  298.87   13.40
   7   7  -5  301.37   15.00
   7  -7   5  280.37   10.60
   7  -7   5  293.87   15.50
  -7  -7  -5  248.08   12.80
  -7   7   5  267.57   14.70
  -7  -7  -5  257.57   11.60
   7  -7   5  296.77    9.30
   7   7  -5  308.07   13.40
   7  -7  -5  266.17   12.00
   7   7   5  269.87   14.00
  -7   7  -5  276.37   15.00
   7  -7  -5  273.57   14.00
  -7   7  -5  297.77   11.40
   7   7   5  281.47   12.10
  -7   7  -5  280.07    9.10
  -7  -7   5  302.07   15.70
  -7   9   5  144.79   11.80
  -7   9   5  146.09    9.50
   7   9  -5  157.48    9.60
   7  -9   5  132.69    7.00
   7  -9   5  129.99   11.20
  -7  -9  -5  145.79   12.30
  -7  -9  -5  125.69    7.60
  -7  -9  -5  152.08   10.30
   7   9  -5  148.69   11.60
  -7   9  -5  148.29    7.30
   7   9   5  140.99   10.30
   7  -9  -5  143.69    8.50
  -7   9  -5  148.29   11.70
   7   9   5  138.09    7.90
   7  -9  -5  147.99    8.30
   7  -9  -5  155.98   11.30
  -7  -9   5  164.98   12.50
  -7  11   5  158.58   10.70
  -7 -11  -5  143.89   13.60
   7  11  -5  159.28   13.40
  -7 -11  -5  138.09    7.60
  -7  11   5  144.69   13.10
  -7 -11  -5  138.79    7.70
   7 -11   5  167.08   14.00
  -7 -11  -5  182.58   12.70
  -7  11  -5  133.69   12.60
  -7  11  -5  148.79    7.70
   7 -11  -5  162.98   12.70
   7 -11  -5  153.48    8.40
  -7 -11   5  152.28   13.30
   7 -11  -5  139.59    8.00
   7  11   5  144.89   11.30
   7  13  -5   36.50    6.20
  -7 -13  -5   50.19   10.80
  -7  13   5   27.80    6.70
  -7  13   5   32.80    5.90
  -7 -13  -5   38.00    7.40
   7  13  -5   37.30    8.80
   7 -13   5   48.40    9.30
  -7 -13   5   52.89   10.20
   7  13   5   31.90    6.60
   7 -13  -5   34.80    7.80
  -7  13  -5   36.70    4.20
  -7  13  -5   48.60   10.10
   7  -1   7 2224.28   60.99
   7   1  -7 2010.90   60.09
   7   1  -7 2099.09   58.19
  -7   1   7 2195.68   61.49
   7   1  -7 2030.50   60.69
  -7  -1  -7 2114.69   60.59
  -7  -1  -7 2106.89   56.19
  -7   1   7 2153.88   59.79
  -7  -1  -7 2138.19   61.49
   7   1  -7 2042.40   60.29
   7  -1   7 2186.88   61.09
  -7  -1  -7 2096.09   60.89
   7  -1   7 2146.79   58.39
  -7   1   7 2125.29   58.89
   7  -1   7 2180.28   60.09
  -7   1  -7 2195.78   59.99
   7  -1  -7 2083.89   60.89
  -7  -1   7 2176.38   60.79
   7   1   7 2243.88   61.09
  -7  -1   7 2211.58   60.69
  -7   1  -7 2063.69   58.29
   7  -1  -7 2057.99   58.69
   7  -1  -7 2078.49   61.09
  -7  -1   7 2154.38   58.29
   7   1   7 2285.47   56.29
   7  -1  -7 2035.40   59.59
  -7   1  -7 2172.88   61.19
   7   1   7 2219.08   61.49
  -7  -1   7 2089.09   60.59
   7   1   7 2189.38   61.19
   7  -1  -7 2136.49   60.89
  -7   3   7 1817.32   53.29
   7  -3   7 1888.31   52.79
   7   3  -7 1668.13   52.99
  -7  -3  -7 1810.82   53.29
   7   3  -7 1823.82   52.59
  -7   3   7 1887.11   52.09
  -7  -3  -7 1869.61   48.60
  -7  -3  -7 1830.02   48.60
   7  -3   7 1832.82   51.89
  -7   3   7 1799.82   53.29
  -7  -3  -7 1868.21   54.69
  -7  -3  -7 1803.82   52.99
   7   3  -7 1809.22   51.49
   7  -3   7 1813.12   53.19
   7   3  -7 1791.92   51.39
  -7  -3   7 1753.52   50.89
  -7   3  -7 1704.93   51.99
  -7  -3   7 1800.52   53.49
   7  -3  -7 1802.12   52.59
   7   3   7 1800.82   54.09
   7  -3  -7 1778.02   51.99
   7   3   7 1843.72   53.29
  -7   3  -7 1869.91   51.19
  -7  -3   7 1736.43   52.29
  -7  -3   7 1806.32   51.59
   7  -3  -7 1704.63   52.09
   7  -3  -7 1787.82   52.89
   7  -3  -7 1813.92   52.99
  -7   3  -7 1807.62   51.79
   7   3   7 1886.61   53.89
  -7   3  -7 1776.72   50.89
  -7   3  -7 1858.71   53.59
   7   5  -7   27.20    2.80
  -7  -5  -7   22.20    4.70
  -7  -5  -7   28.70    3.10
   7   5  -7   36.20    4.40
  -7  -5  -7   35.20    3.20
  -7   5   7   30.10    4.70
  -7  -5  -7   23.20    4.30
  -7   5   7   23.30    3.90
  -7   5   7   29.10    3.90
   7  -5   7   26.10    2.90
   7   5  -7   28.50    3.70
   7  -5   7   29.10    4.80
  -7   5  -7   29.60    3.00
  -7  -5   7   26.90    4.10
  -7  -5   7   37.10    3.30
  -7  -5   7   21.10    3.50
  -7   5  -7   27.30    3.00
   7  -5  -7   30.30    4.80
   7   5   7   27.40    3.80
  -7  -5   7   25.30    4.90
  -7   5  -7   36.00    5.60
   7  -5  -7   27.20    3.70
   7   5   7   28.40    4.90
  -7   5  -7   28.10    3.00
   7   7  -7  420.76   19.20
   7  -7   7  417.16   15.30
   7   7  -7  430.56   17.60
  -7  -7  -7  416.36   16.90
  -7   7   7  452.25   20.30
  -7   7   7  474.15   18.40
  -7   7   7  428.86   18.40
   7   7  -7  419.66   13.50
  -7  -7  -7  436.56   21.40
   7   7  -7  424.66   13.70
  -7  -7  -7  405.76   17.10
   7  -7   7  412.56   17.80
   7   7   7  458.25   19.90
  -7  -7   7  440.86   20.70
   7  -7  -7  420.16   18.50
  -7   7  -7  435.26   22.80
  -7   7  -7  419.96   14.30
  -7   7  -7  422.46   15.20
   7   7   7  446.76   17.90
   7  -9   7  184.88    8.90
  -7   9   7  197.38   14.10
  -7  -9  -7  191.58   14.30
   7   9  -7  189.48   13.20
  -7  -9  -7  196.48   11.70
   7   9  -7  191.68   11.30
   7  -9   7  193.68   14.00
  -7  -9   7  187.58   14.00
  -7   9  -7  201.28    9.10
   7  -9  -7  194.28   12.60
   7   9   7  195.98   12.80
   7  -9  -7  184.48   11.10
  -7   9  -7  193.48   13.90
   7   9   7  205.28   11.00
  -7  11   7  205.18   15.90
   7  11  -7  172.78   11.10
  -7 -11  -7  177.58   15.40
  -7 -11  -7  164.68   12.30
  -7  11   7  179.08   12.20
   7 -11   7  172.58   14.60
   7  11  -7  155.18   13.50
   7  11   7  190.58   10.40
  -7  11  -7  171.08    8.60
  -7  11  -7  168.58   14.40
   7 -11  -7  167.48   10.50
   7 -11  -7  166.08   12.90
  -7 -11   7  182.48   14.90
   7  11   7  194.78   13.70
   7  13  -7   56.99    7.00
  -7 -13  -7   46.30    9.60
  -7 -13  -7   53.39    8.70
   7  13  -7   42.70    8.70
   7 -13   7   41.20    8.80
  -7  13   7   43.20    7.50
  -7  13  -7   50.29    9.90
  -7 -13   7   60.79   11.10
   7 -13  -7   49.00   10.40
   7  13   7   47.50    8.40
   7 -13  -7   54.69    5.60
   7 -13  -7   45.80    8.40
   7  -1   9  547.95   21.00
  -7   1   9  566.64   19.70
   7   1  -9  634.54   21.90
  -7   1   9  564.34   19.30
   7   1  -9  590.14   18.90
  -7  -1  -9  516.95   21.00
   7  -1   9  538.85   20.70
   7  -1   9  515.95   19.20
   7   1  -9  550.54   20.10
  -7  -1  -9  544.95   16.50
  -7   1   9  584.74   21.70
  -7  -1   9  596.14   21.30
  -7   1  -9  542.65   18.30
   7   1   9  534.85   16.40
  -7  -1   9  575.24   18.80
   7  -1  -9  598.54   19.40
  -7  -1   9  568.84   20.50
   7  -1  -9  573.14   19.80
   7   1   9  532.65   21.10
  -7   1  -9  583.04   20.70
   7   1   9  528.55   20.70
   7  -1  -9  622.24   22.00
  -7   1  -9  570.84   21.10
   7   1   9  510.35   20.60
  -7   1  -9  589.34   20.50
  -7   3   9  637.34   24.20
   7   3  -9  724.13   24.20
  -7  -3  -9  620.04   18.50
   7   3  -9  663.33   22.70
   7  -3   9  635.34   22.80
   7  -3   9  660.03   22.90
   7   3  -9  664.93   22.10
  -7  -3  -9  644.74   25.00
  -7  -3  -9  612.94   18.50
  -7   3   9  658.63   22.20
  -7   3  -9  635.34   22.20
  -7   3  -9  640.34   22.90
  -7   3  -9  678.93   24.30
  -7  -3   9  666.53   23.00
  -7  -3   9  694.63   24.30
   7  -3  -9  674.13   23.30
  -7   3  -9  598.74   22.30
   7   3   9  644.44   24.20
   7  -3  -9  649.04   22.30
  -7  -3   9  664.23   21.90
   7   3   9  612.04   24.00
   7  -3  -9  609.34   22.80
  -7   3  -9  628.54   22.20
   7  -3  -9  657.13   24.50
  -7   5   9  672.43   26.20
  -7  -5  -9  761.02   28.60
  -7   5   9  671.33   24.40
  -7  -5  -9  745.23   22.30
   7   5  -9  699.23   25.20
  -7  -5  -9  725.23   22.00
   7  -5   9  678.33   23.60
   7  -5   9  705.03   26.60
   7   5  -9  660.13   23.30
  -7   5   9  697.93   26.30
   7   5  -9  689.83   25.20
   7   5   9  698.13   26.20
  -7   5  -9  733.93   24.10
  -7  -5   9  675.53   27.00
  -7   5  -9  733.43   23.70
  -7   5  -9  705.93   26.80
   7   5   9  738.03   27.40
   7  -5  -9  680.63   26.40
  -7  -5   9  667.53   23.50
  -7   5  -9  685.43   23.40
   7  -5  -9  670.23   24.70
  -7  -7  -9  291.57   13.10
   7   7  -9  304.67   11.90
  -7  -7  -9  310.67   13.20
  -7   7   9  297.17   15.20
   7  -7   9  288.47   12.10
  -7  -7  -9  322.37   18.10
   7   7  -9  302.17   11.80
   7   7  -9  312.47   14.80
   7  -7   9  297.77   16.70
  -7   7   9  296.27   19.80
   7   7  -9  316.27   15.90
  -7   7  -9  293.27   12.60
   7  -7  -9  290.47   14.80
  -7   7  -9  309.07   16.70
   7   7   9  302.37   16.40
  -7   7  -9  304.57   12.60
  -7  -7   9  290.07   16.70
  -7   7  -9  283.27   14.40
   7   7   9  300.07   15.00
  -7  -9  -9   93.49    7.50
  -7  -9  -9   95.19   10.40
   7   9  -9   92.69    9.10
   7   9  -9  107.59    8.50
   7  -9   9   94.89   10.00
  -7   9   9   84.59    8.50
   7  -9   9   78.39    4.30
   7  -9  -9  101.39    8.90
  -7   9  -9   93.29    9.70
  -7   9  -9   85.29    4.40
  -7   9  -9   99.59    6.50
  -7  -9   9   85.29    9.60
  -7   9  -9   85.09    6.10
   7  -9  -9  104.29   10.70
   7   9   9   75.19    8.50
   7   9   9   82.99    7.70
  -7  11   9  135.79   11.20
   7  11  -9  126.09   12.20
   7  11  -9  138.69   10.20
  -7 -11  -9  147.09   11.00
  -7 -11   9  116.99   12.50
  -7  11  -9  129.39    7.60
   7 -11  -9  124.09    9.90
   7  11   9  108.49   11.00
  -7  11  -9  122.29   12.60
   7 -11  -9  134.79   13.40
   7 -11  -9  135.09   11.30
   7  11   9  126.89    9.50
  -7 -13  -9   50.69    8.30
   7 -13   9   49.50    9.60
  -7  13   9   46.60    8.20
   7  13  -9   54.89   10.50
  -7 -13  -9   47.80   10.40
   7  13  -9   54.39    7.60
  -7 -13  -9   52.89    7.50
   7 -13  -9   54.69   11.00
   7  13   9   52.69    9.10
  -7 -13   9   54.09   10.10
   7 -13  -9   53.19    6.60
   7 -13  -9   68.59    8.90
  -7  13  -9   58.89   10.60
   7  -1  11 1809.22   55.69
  -7   1  11 1809.32   53.29
   7   1 -11 1895.21   56.29
  -7   1  11 1799.42   56.29
   7   1 -11 1717.63   53.69
  -7   1  11 1774.12   54.89
  -7  -1 -11 1733.63   49.40
   7   1 -11 1856.11   52.59
  -7  -1 -11 1838.52   55.99
   7  -1  11 1877.61   51.89
  -7  -1  11 1802.12   52.49
  -7   1 -11 1872.31   55.59
   7  -1 -11 1814.42   52.89
   7  -1 -11 1846.72   56.39
   7   1  11 1843.02   49.50
   7   1  11 1775.12   55.69
  -7  -1  11 1870.81   54.39
   7  -1 -11 1662.43   52.79
  -7   1 -11 1879.11   55.49
  -7  -1  11 1900.61   56.19
  -7   1 -11 1775.62   51.49
   7   1  11 1766.92   55.99
   7  -3  11  186.78   10.10
  -7  -3 -11  164.28    6.20
   7   3 -11  183.98   11.00
  -7   3  11  179.48   11.40
   7   3 -11  169.58    9.20
  -7   3  11  170.18    9.20
   7  -3  11  185.48   10.60
  -7  -3 -11  188.38   11.90
  -7  -3 -11  175.78    6.30
  -7   3 -11  165.78    9.60
   7  -3 -11  180.48   10.30
  -7   3 -11  179.08   10.90
  -7  -3  11  175.08   10.70
  -7   3 -11  183.68   10.20
  -7  -3  11  169.48    9.20
   7  -3 -11  165.58    9.20
   7   3  11  179.18   11.20
  -7  -3  11  175.28   10.40
   7  -3 -11  161.68   10.00
   7  -3 -11  178.38   11.40
   7   3  11  176.68   11.20
  -7   5  11  941.61   33.40
   7  -5  11  867.71   30.10
  -7  -5 -11  889.31   37.00
  -7  -5 -11  806.82   26.00
   7  -5  11  895.21   32.20
  -7   5  11  902.01   32.90
   7   5 -11  849.52   30.60
  -7   5  11  930.51   30.20
   7   5 -11  891.31   31.60
  -7  -5 -11  833.52   25.90
   7  -5 -11  885.41   33.20
  -7  -5  11  860.91   29.90
  -7   5 -11  858.01   32.60
   7   5  11  920.41   33.70
   7   5  11  876.01   32.50
  -7   5 -11  896.81   29.80
   7  -5 -11  912.41   32.70
  -7  -7 -11   21.90    5.80
   7   7 -11   20.40    3.80
  -7   7  11   21.40    5.00
   7   7 -11   20.30    3.60
   7  -7  11   25.00    5.90
  -7  -7 -11   25.00    3.70
   7  -7  11   24.60    4.10
  -7   7  11   18.70    5.00
   7   7  11   26.30    5.90
   7  -7 -11   25.80    5.90
  -7  -7  11   22.20    3.80
  -7  -7  11   19.80    5.00
   7   7  11   22.90    5.40
  -7   7 -11   22.10    3.90
   7  -7 -11   22.60    5.00
  -7   7 -11   19.30    4.90
   7   9 -11  399.66   18.70
   7   9 -11  356.26   14.80
  -7   9  11  377.66   20.50
   7  -9  11  396.66   14.50
   7  -9  11  388.46   22.10
   7   9 -11  362.46   13.40
  -7  -9 -11  384.26   22.50
  -7   9  11  387.86   19.70
   7   9 -11  368.86   20.10
  -7  -9 -11  390.56   16.90
  -7  -9  11  397.86   22.50
  -7   9 -11  409.76   22.10
   7   9  11  394.56   19.50
   7  -9 -11  386.76   21.80
   7   9  11  386.76   21.40
   7  -9 -11  404.56   19.40
  -7   9 -11  392.96   16.20
   7  11 -11   31.90    7.30
  -7 -11 -11   41.30    6.30
   7 -11  11   44.70    9.20
   7  11 -11   47.00    7.20
  -7 -11 -11   41.40    9.20
  -7  11  11   46.60    8.00
   7  11  11   41.00    6.80
   7 -11 -11   38.70    7.50
   7  11  11   42.80   12.90
  -7 -11  11   43.10    9.10
  -7  11 -11   42.20    8.50
   7 -11 -11   40.70    7.30
   7 -11 -11   36.10    8.00
  -7  11 -11   39.50    4.70
   7  -1  13  495.05   21.70
  -7  -1 -13  520.65   21.90
  -7  -1 -13  473.65   15.70
   7   1 -13  485.65   18.60
  -7   1  13  482.85   19.10
   7  -1  13  521.55   18.00
  -7   1  13  481.75   22.00
   7   1 -13  472.45   21.40
  -7  -1 -13  503.35   21.90
  -7   1  13  460.65   18.90
   7   1  13  468.55   21.80
  -7  -1  13  456.35   18.30
  -7   1 -13  512.65   21.50
   7  -1 -13  483.05   21.90
  -7  -1  13  511.55   21.90
   7   1  13  489.95   21.60
   7  -1 -13  473.95   18.90
  -7   1 -13  507.85   21.30
  -7  -1  13  484.75   19.80
  -7   1 -13  473.15   17.60
   7  -1 -13  439.76   20.30
   7   1  13  503.05   15.70
  -7  -3 -13  316.27    9.40
   7   3 -13  312.57   16.00
  -7   3  13  277.57   15.90
   7  -3  13  270.17   13.50
   7   3 -13  312.27   13.90
  -7   3  13  280.37   13.00
  -7  -3 -13  326.97   24.00
  -7  -3 -13  289.47   11.10
   7  -3 -13  280.87   13.30
   7   3  13  269.97   15.80
  -7   3 -13  283.27   15.30
   7   3  13  282.47   16.00
   7  -3 -13  311.47   14.90
   7  -3 -13  309.37   16.90
  -7   3 -13  299.07   14.90
  -7  -3  13  227.98   14.70
  -7  -3  13  271.87   14.80
   7  -5  13  758.82   31.50
   7   5 -13  707.13   28.10
  -7   5  13  672.93   25.10
  -7  -5 -13  676.03   20.60
  -7   5  13  707.93   29.40
  -7  -5 -13  691.43   20.70
   7  -5  13  714.93   26.90
   7   5 -13  694.23   26.70
  -7  -5 -13  694.83   30.20
  -7  -5  13  692.13   26.60
   7   5  13  727.63   29.60
  -7   5 -13  727.63   29.10
   7   5  13  730.53   30.10
   7  -5 -13  684.13   28.30
  -7   5 -13  710.73   26.50
   7  -5 -13  703.53   29.90
  -7  -5  13  733.43   29.30
   7  -7  13   76.89    8.80
  -7  -7 -13   96.29   10.40
  -7   7  13   81.39    8.90
   7   7 -13   76.59    7.90
  -7  -7 -13   80.49    5.20
   7  -7  13   66.69    6.50
  -7   7  13   85.69    9.40
  -7  -7 -13   70.89    5.30
   7   7 -13   80.89    8.20
   7   7  13   78.39    8.50
   7   7  13   70.39    8.90
  -7   7 -13   89.99    7.30
  -7  -7  13   75.19    6.80
  -7  -7  13   80.69    9.50
  -7   7 -13   79.49    8.80
   7  -7 -13   79.19    9.00
   7  -7 -13   92.09    9.50
   7  -7 -13   76.49    7.20
   7   9 -13  129.89   10.20
  -7  -9 -13  106.39    7.40
   7  -9  13  110.09    7.40
   7  -9  13   94.79   10.80
  -7  -9 -13  101.29   11.70
   7   9 -13  113.89    7.10
   7   9 -13  100.89   10.00
  -7   9  13   98.79   10.10
  -7   9  13  103.69   10.60
   7   9  13  104.09   11.10
  -7   9 -13  111.49    8.10
   7   9  13   93.29    9.90
  -7  -9  13  103.19   11.60
   7  -9 -13  106.19    9.30
   7  -9 -13  104.69   11.30
   7  -9 -13   94.99   10.50
  -7   9 -13  103.29   10.90
   7 -11  13   21.00    6.90
   7  11 -13   23.50    5.60
  -7 -11 -13   18.60    4.00
   7  11 -13   13.10    5.40
  -7  11  13   23.30    6.40
  -7 -11 -13   22.50    7.50
   7  11  13   17.40    5.40
   7 -11 -13   26.20    6.90
  -7  11 -13   26.20    4.60
   7 -11 -13   18.60    6.10
   7 -11 -13   12.70    5.20
   7  11  13   10.30    5.20
   7 -11 -13   21.60    5.50
  -7 -11  13   16.70    6.70
  -7  11 -13   17.30    5.70
   7   1 -15   25.10    4.50
   7  -1  15   33.30    6.70
   7  -1  15   27.10    3.60
  -7   1  15   32.10    4.40
  -7   1  15   26.30    6.00
  -7  -1 -15   39.60    7.10
  -7  -1 -15   28.50    3.00
   7   1 -15   20.70    5.10
  -7  -1 -15   36.70    6.50
   7   1  15   29.20    6.10
   7   1  15   35.30    3.10
  -7   1 -15   20.40    3.80
  -7   1 -15   31.70    6.50
  -7   1 -15   30.20    5.90
   7  -1 -15   24.70    5.70
  -7  -1  15   21.30    4.40
  -7  -1  15   18.10    4.70
   7  -1 -15   29.60    5.10
  -7  -3 -15   99.49    9.60
   7  -3  15   96.59    7.60
   7   3 -15  102.89    9.50
   7   3 -15   98.79    7.70
  -7   3  15  106.99    7.50
   7  -3  15  108.09    9.40
  -7   3  15  113.39   10.40
   7   3  15   97.09    9.70
   7  -3 -15  105.19    8.60
  -7   3 -15   99.09    8.80
   7  -3 -15   91.79    9.60
  -7  -3  15   99.89    9.20
  -7   3 -15  106.49    9.20
   7   3  15   99.39    9.90
  -7  -3  15  107.19    9.10
   7  -5  15   89.29    8.40
   7   5 -15   80.09    8.40
  -7  -5 -15   71.09    9.10
   7  -5  15   85.19    8.30
   7   5 -15   66.39    6.90
  -7   5  15   63.29    6.10
  -7   5  15   63.99    8.50
  -7   5 -15  101.59    8.70
   7  -5 -15   70.39    7.90
   7   5  15   79.79    9.30
   7  -5 -15   53.29    8.60
  -7  -5  15   76.59    7.80
  -7  -5  15   72.89    8.40
   7   5  15   84.09    9.20
  -7   5 -15   81.69    8.60
  -7   7  15  267.57   17.70
   7   7 -15  275.07   16.10
   7  -7  15  282.47   17.60
   7  -7  15  276.97   14.90
  -7  -7 -15  289.17   19.30
  -7  -7 -15  275.77    9.50
   7   7 -15  283.47   16.40
   7  -7 -15  289.57   18.00
  -7   7 -15  292.07   18.10
   7   7  15  308.77   19.40
  -7   7 -15  307.07   15.60
   7  -7 -15  282.37   14.70
   7  -7 -15  299.67   19.20
   7   7  15  264.07   17.30
  -7  -7  15  276.77   18.10
  -7  -7  15  262.37   14.50
  -7   9  15   26.20    9.90
   7   9 -15   30.80    6.40
  -7  -9 -15   28.10    7.10
   7   9 -15   17.90    4.80
   7  -9  15   24.50    7.10
   7   9 -15   21.30    4.40
   7  -9 -15   23.40    7.00
   7   9  15   18.00    5.30
   7  -9 -15   24.00    5.10
   7  -9 -15   19.50    6.50
  -7  -9  15   26.80    7.10
  -7   9 -15   28.30    5.60
   7   9  15   19.20    6.70
  -7   9 -15   20.80    8.10
   7   1 -17  105.49   10.40
  -7  -1 -17  102.59   10.10
  -7   1  17  107.99    8.20
  -7   1  17  110.99   10.90
  -7  -1 -17  103.69    5.70
   7   1 -17   97.49    8.00
  -7  -1 -17  110.59   10.70
   7  -1  17  109.39   10.60
   7  -1  17  116.69    7.40
  -7  -1  17   99.69   10.10
  -7   1 -17  126.89   11.20
   7  -1 -17  104.19    8.40
  -7   1 -17  118.49   10.20
  -7   1 -17  103.89    7.40
   7   1  17  125.19   11.50
  -7  -1  17  101.29   10.00
   7  -1 -17  112.59   10.80
   7   1  17  117.79    5.60
  -7   3  17   35.20    6.90
  -7  -3 -17   35.70    7.30
  -7  -3 -17   46.00    8.90
   7  -3  17   35.10    5.50
   7   3 -17   32.60    6.90
   7   3 -17   36.10    5.80
  -7   3  17   33.70    5.10
   7  -3  17   45.70    8.10
   7  -3 -17   31.60    7.00
   7   3  17   38.80    7.80
  -7   3 -17   34.10    6.80
  -7   3 -17   33.90    6.90
   7  -3 -17   36.60    6.00
  -7  -3  17   30.50    5.90
  -7  -3  17   42.30    7.70
   7   5 -17  108.99    9.60
   7   5 -17  116.99   11.20
  -7   5  17  137.99    9.10
  -7  -5 -17  142.49   13.10
  -7   5  17  142.49   13.10
   7  -5  17  140.29   11.30
   7  -5  17  135.29   10.90
  -7  -5  17  137.89   12.00
  -7   5 -17  147.29   11.40
  -7  -5  17  139.89   11.40
   7   5  17  136.69   13.00
  -7   5 -17  129.79   11.60
   7  -5 -17  130.59   11.40
   7  -7  17   85.19    8.70
   7   7 -17   95.19    9.40
   7  -7  17   80.29   10.00
  -7   7  17   84.79   10.20
   7   7 -17  106.39   10.20
  -7   7 -17   95.39    9.00
   7  -7 -17  100.29   10.90
  -7  -7  17   86.19    8.50
   7  -7 -17  101.19   11.60
   7   7  17   86.69   10.60
   7   7  17   85.29   10.80
  -7  -7  17   91.89   11.10
   7  -7 -17  104.39    8.10
  -7   7 -17   92.59   10.20
  -7  -9 -17   22.60    7.00
   7  -9  17   26.40    5.20
  -7   9  17   19.80    6.10
   7   9 -17   16.90    4.70
   7   9 -17   25.80    6.40
   7  -9  17   17.10    6.20
   7   9 -17   29.00    7.70
   7   9  17   22.60    7.20
  -7   9 -17   20.80    5.20
   7  -9 -17   32.00    7.80
  -7   9 -17   20.80    6.50
  -7  -9  17   22.40    7.50
   7  -9 -17   15.80    4.40
   7  -9 -17   15.80    5.60
   7   9  17   21.20    6.50
   7   1 -19   97.19   12.60
   7   1 -19   94.39    8.20
   7  -1  19   79.49    6.20
  -7   1  19   95.49   10.90
   7  -1  19   66.69   12.90
  -7   1  19   68.29    6.90
  -7  -1 -19   81.99    9.50
   7   1  19   66.39    3.60
  -7  -1  19   94.99    8.50
   7  -1 -19   75.39    7.90
   7   1  19   70.29    9.50
  -7   1 -19   97.39   10.40
   7  -1 -19   84.09   10.10
  -7   1 -19   86.69    9.50
  -7  -3 -19   27.80    6.60
   7   3 -19   23.00   10.70
   7  -3  19   20.00    7.50
   7   3 -19   25.40    5.10
  -7   3  19   20.80    6.20
   7  -3  19   26.60    6.10
  -7   3  19   27.20    4.80
  -7  -3 -19   24.00    6.50
  -7  -3  19   21.50    5.10
  -7   3 -19   20.80    6.00
   7  -3 -19   25.00    5.70
  -7   3 -19   22.30    6.40
   7   3  19   37.40    8.30
   7  -3 -19   18.20    6.40
  -7  -3  19   22.90    6.30
   7   5 -19   45.70    8.40
   7  -5  19   39.00    7.60
   7   5 -19   40.50    7.10
  -7   5  19   37.60    8.30
   7  -5  19   47.10    7.80
  -7   5  19   39.10    5.60
  -7  -5 -19   32.20    8.20
  -7  -5 -19   35.00    8.20
  -7   5 -19   36.40    6.90
  -7  -5  19   36.80    7.00
   7   5  19   43.80    9.40
   7  -5 -19   49.00    8.40
   7  -5 -19   41.80    8.80
  -7  -5  19   33.00    6.80
  -7   5 -19   50.49    8.70
  -7  -7 -19   86.29   13.70
  -7   7  19   75.09   10.30
   7   7 -19   65.49   10.00
   7  -7  19   70.59    8.60
  -7  -7 -19   59.69   11.20
   7   7 -19   74.29    8.90
  -7   7 -19   65.69    8.60
  -7  -7  19   81.39   10.80
   7   7  19   58.89   10.30
   7  -7 -19   71.89   12.00
   7  -7 -19   60.09   10.20
  -7   7 -19   68.99   10.70
  -7  -7  19   69.69    8.50
  -7   1  21  248.88   18.90
  -7  -1 -21  243.58   18.70
  -7   1  21  259.07   13.70
   7  -1  21  278.67   19.60
   7   1 -21  217.28   14.00
   7   1 -21  273.97   19.40
  -7  -1 -21  283.07   18.30
   7  -1 -21  267.07   15.30
  -7   1 -21  242.48   16.80
   7  -1 -21  263.17   19.10
   7   1  21  251.77   19.20
  -7  -1  21  258.27   14.90
  -7  -1  21  272.27   19.10
  -7   1 -21  251.57   18.10
  -7  -3 -21   30.10    7.50
   7   3 -21   26.50    5.60
  -7  -3 -21   38.00    9.10
   7  -3  21   30.40    5.60
   7  -3  21   29.70    7.70
   7   3 -21   27.50    7.50
  -7   3  21   26.70    7.30
   7   3  21   25.40    6.40
  -7  -3  21   29.10    7.60
   7  -3 -21   34.00    6.30
  -7   3 -21   31.10    7.10
   7  -3 -21   26.50    6.40
  -7  -3  21   33.30    6.80
   8   0   0  998.50   26.70
  -8   0   0  950.00   27.10
   8   0   0  983.60   26.70
   8   0   0  993.50   27.20
   8   0   0  970.90   27.00
  -8   0   0  970.80   27.20
  -8   0   0  976.10   27.00
  -8   0   0  979.10   26.70
   8  -2   0  225.88    8.40
   8   2   0  228.08    8.50
   8  -2   0  228.08    6.50
   8   2   0  218.38    7.40
  -8   2   0  218.38    7.60
  -8  -2   0  213.68    8.10
   8  -2   0  221.98    6.50
  -8  -2   0  214.38    8.40
  -8   2   0  234.38    8.50
   8   2   0  209.18    8.00
   8  -2   0  221.68    8.60
  -8   2   0  217.28    8.60
  -8  -2   0  222.88    8.40
   8  -2   0  219.18    7.70
  -8  -2   0  216.48    7.40
   8   2   0  226.38    8.50
   8  -4   0 1037.80   32.00
   8   4   0 1014.10   31.20
   8  -4   0 1045.10   32.20
  -8  -4   0  992.00   31.00
   8  -4   0 1051.29   29.00
   8   4   0  989.00   31.00
   8   4   0 1065.49   32.20
  -8   4   0 1010.90   28.80
  -8   4   0 1023.60   28.30
   8  -4   0 1025.60   31.90
   8   4   0 1039.10   28.30
  -8   4   0 1036.60   32.00
  -8  -4   0 1022.90   31.40
  -8  -4   0 1028.00   28.30
   8  -4   0 1039.30   28.40
  -8  -4   0 1012.90   31.70
  -8  -6   0  191.88   10.50
   8   6   0  199.28    6.40
   8   6   0  183.08   10.00
  -8   6   0  206.78   11.20
   8  -6   0  188.38   10.70
  -8  -6   0  186.08    9.60
   8  -6   0  195.68    7.30
  -8   6   0  195.28    7.80
   8   6   0  188.18   10.80
   8   6   0  193.68    9.80
   8  -6   0  194.88    7.90
   8  -6   0  193.68    7.30
   8  -8   0   15.40    2.80
  -8   8   0   15.90    4.20
   8  -8   0   25.30    5.40
   8  -8   0   14.20    1.60
   8   8   0   17.30    3.60
   8   8   0   14.00    4.20
  -8   8   0   16.00    2.70
   8  -8   0   18.50    1.70
  -8  -8   0   14.20    3.80
   8  10   0  253.17   16.70
   8 -10   0  268.67   16.50
  -8  10   0  257.87   11.50
  -8 -10   0  282.47   16.50
   8  10   0  287.77   14.60
  -8  10   0  267.87   16.90
   8 -10   0  264.87   11.90
  -8  12   0   18.60    3.40
   8  12   0   19.70    6.40
   8  12   0   14.00    3.90
  -8 -12   0   18.20    5.90
   8 -12   0   18.30    5.50
  -8  12   0   12.30    5.10
  -8  14   0  124.39    8.60
   8 -14   0  124.29   12.80
   8  14   0  113.09   10.40
  -8 -14   0  135.59   13.60
   8  14   0  130.19   14.10
  -8  14   0  104.79   12.60
   8   0  -2    3.00    0.90
  -8   0   2    0.20    0.50
  -8   0   2    0.30    0.70
   8   0   2    2.30    0.60
  -8   0  -2    3.20    0.70
   8   0  -2    2.20    0.90
   8   0  -2    2.80    0.90
  -8   0   2    2.10    0.80
   8   0  -2    1.70    0.70
  -8   0  -2    1.00    0.60
  -8   0  -2    1.60    0.80
   8   0   2    2.20    0.90
   8   0   2    2.10    0.70
   8   0   2    1.30    0.80
  -8  -2  -2 5364.56  140.99
   8  -2   2 5367.36  150.48
   8   2  -2 5439.76  146.69
  -8   2   2 5513.55  152.08
   8   2  -2 5362.76  151.78
   8   2  -2 5452.45  151.58
  -8  -2  -2 5356.86  153.28
   8  -2   2 5299.97  148.59
  -8   2   2 5641.74  148.09
  -8  -2  -2 5462.55  152.98
   8  -2   2 5418.46  151.58
   8  -2  -2 5407.86  149.19
  -8  -2   2 5363.46  151.78
   8  -2  -2 5478.95  150.28
   8   2   2 5594.24  153.68
  -8  -2   2 5557.14  151.78
   8   2   2 5361.16  152.88
   8  -2  -2 5478.55  151.68
   8   2   2 5576.44  140.99
  -8   2  -2 5419.36  148.79
  -8   2  -2 5175.38  149.79
   8  -2  -2 5298.77  147.89
  -8   2  -2 5237.98  151.38
  -8  -2   2 5471.75  146.99
   8  -4   2  173.08    5.70
  -8  -4  -2  193.58    8.80
   8   4  -2  169.38    8.50
   8  -4   2  178.88    9.00
  -8  -4  -2  185.98    7.30
   8   4  -2  168.58    8.10
   8   4  -2  161.38    8.50
   8  -4   2  175.18    8.80
   8  -4   2  180.08    6.70
  -8  -4  -2  192.08    9.50
   8   4  -2  170.68    5.90
  -8   4   2  185.28    7.30
  -8   4   2  176.68    8.70
   8  -4  -2  174.28    7.40
   8   4   2  194.28    9.00
   8   4   2  180.58    7.20
  -8  -4   2  169.78    8.80
  -8   4  -2  162.58    8.70
   8  -4  -2  180.48    7.50
   8   4   2  185.98    8.10
  -8   4  -2  175.28    6.50
   8  -4  -2  185.68    8.90
   8  -4  -2  183.88    7.30
   8  -4  -2  187.08    9.00
  -8  -4   2  161.98    7.90
   8   4   2  206.78    9.80
   8  -4  -2  176.48    8.80
  -8   4  -2  175.78    9.00
  -8   4  -2  174.38    5.80
  -8  -4   2  160.48    8.10
  -8  -6  -2  446.76   17.90
  -8  -6  -2  483.35   18.30
   8   6  -2  494.75   17.80
  -8  -6  -2  465.25   15.10
   8  -6   2  444.96   14.00
  -8   6   2  467.05   16.20
   8  -6   2  447.76   14.40
   8  -6   2  458.45   19.20
   8   6  -2  467.05   19.10
  -8   6   2  468.05   19.30
   8  -6  -2  493.45   17.00
   8   6   2  449.36   17.80
   8  -6  -2  511.65   19.40
  -8  -6   2  473.15   17.60
   8   6   2  475.05   19.80
  -8  -6   2  458.75   19.00
   8   6   2  463.05   18.20
   8  -6  -2  502.15   15.80
  -8   6  -2  447.36   13.80
   8  -6  -2  467.95   16.30
  -8   6  -2  479.05   19.40
  -8   6  -2  455.55   14.60
   8   6   2  469.15   15.10
  -8   8   2 1010.60   32.00
  -8  -8  -2 1026.50   29.40
  -8   8   2  980.10   37.10
   8  -8   2 1035.40   30.30
   8   8  -2 1063.59   37.30
  -8  -8  -2 1030.20   35.50
   8   8  -2 1064.59   34.30
   8   8   2 1067.99   29.50
  -8  -8   2 1099.79   37.30
   8   8   2 1047.10   35.10
   8  -8  -2 1034.60   36.50
   8  -8  -2  963.90   32.00
   8  -8  -2  990.50   35.20
   8  -8  -2  978.60   30.00
  -8  10   2   39.40    7.20
   8  10  -2   52.69    6.00
   8  10  -2   49.40    8.50
  -8 -10  -2   60.69    7.20
   8 -10   2   46.30    8.20
   8 -10   2   56.69    4.50
  -8  10   2   55.19    5.20
   8 -10  -2   48.70    3.30
  -8  10  -2   62.39    4.60
   8  10   2   47.30    8.00
   8 -10  -2   51.69    3.50
  -8  10  -2   66.29    8.10
   8 -10  -2   54.29    7.20
   8  10   2   64.09    9.90
  -8 -10   2   45.80    8.10
  -8 -12  -2   95.69   10.20
  -8  12   2   93.59   10.90
   8 -12   2   71.79    9.60
   8  12  -2   90.89    8.20
   8  12  -2   84.69   12.50
  -8  12   2   84.19    7.20
   8  12   2   84.69   10.60
   8 -12  -2   92.49   10.40
   8  12   2   83.79    8.40
  -8 -12   2   74.79    9.60
  -8  12  -2   88.29    6.20
  -8  12  -2   84.69   10.20
   8  14  -2   61.79   11.00
  -8  14   2   53.89    7.20
  -8  14   2   55.39   10.10
  -8 -14  -2   67.59   10.80
   8  14  -2   65.79    8.80
   8 -14   2   63.59   11.10
   8  14   2   63.99    8.40
   8  14   2   70.99   13.00
  -8  14  -2   72.49   12.60
  -8 -14   2   53.19    9.80
   8 -14  -2   58.99   11.00
   8   0   4  192.18    8.20
   8   0   4  205.18    7.80
  -8   0  -4  201.58    7.70
  -8   0   4  184.08    7.90
  -8   0   4  194.08    8.10
  -8   0  -4  190.68    8.10
   8   0  -4  194.38    8.00
  -8   0   4  176.78    7.90
   8   0  -4  187.28    8.00
   8   0   4  212.38    6.30
   8   0  -4  186.18    6.00
   8   0   4  205.78    6.20
   8   0   4  200.68    8.40
  -8   0   4  188.38    6.10
   8   0  -4  203.28    8.20
  -8   0  -4  195.78    8.40
   8  -2   4 1653.23   46.30
  -8   2   4 1772.42   47.00
   8  -2   4 1617.24   47.10
  -8  -2  -4 1657.23   48.10
   8   2  -4 1621.64   45.40
  -8  -2  -4 1684.83   43.90
  -8  -2  -4 1627.74   47.10
  -8  -2  -4 1645.74   46.90
   8   2  -4 1663.43   46.90
   8   2  -4 1628.74   45.80
   8   2  -4 1562.14   47.20
   8  -2   4 1580.94   46.40
  -8   2   4 1709.83   47.20
  -8   2   4 1715.73   46.20
  -8  -2  -4 1661.23   43.80
   8   2   4 1766.02   47.60
   8  -2  -4 1715.43   46.80
  -8   2  -4 1623.84   44.90
  -8  -2   4 1670.63   47.60
  -8  -2   4 1585.34   46.60
   8  -2  -4 1663.63   45.90
  -8  -2   4 1687.63   46.10
   8  -2  -4 1660.43   46.90
  -8   2  -4 1588.14   46.30
  -8   2  -4 1645.74   44.90
  -8  -2   4 1708.23   45.40
  -8   2  -4 1630.64   47.40
   8  -2  -4 1673.73   46.90
  -8   2  -4 1610.84   46.10
   8   2   4 1728.13   47.20
   8   2   4 1731.53   48.10
  -8   4   4  187.98    8.50
   8  -4   4  159.68    8.90
   8  -4   4  180.08    6.60
   8   4  -4  178.18    6.80
  -8  -4  -4  174.88    7.60
   8   4  -4  194.68    9.00
   8   4  -4  170.08    9.30
   8   4  -4  182.58    6.80
  -8  -4  -4  163.98    9.60
  -8   4   4  191.68    8.50
   8   4  -4  189.08    8.70
   8  -4   4  173.58    9.20
  -8  -4  -4  164.38    8.80
  -8  -4  -4  167.98    8.00
  -8   4   4  191.18    9.30
  -8  -4  -4  171.98    9.70
   8  -4   4  171.08    7.20
  -8   4   4  197.28    9.20
   8   4   4  174.18    7.60
   8  -4  -4  183.08    8.40
  -8  -4   4  180.18    8.50
   8  -4  -4  188.78    8.30
  -8   4  -4  184.38    9.40
   8  -4  -4  188.18    9.10
  -8   4  -4  172.38    7.10
  -8  -4   4  187.78    8.70
  -8   4  -4  176.38    6.40
   8  -4  -4  202.08    9.20
   8   4   4  177.18    8.20
  -8   4  -4  170.88    9.30
   8   4   4  176.48    9.10
  -8  -4   4  189.98    9.70
   8   6  -4  506.15   20.40
  -8  -6  -4  528.45   19.20
   8  -6   4  515.85   15.90
   8   6  -4  556.24   19.50
  -8   6   4  497.35   18.50
   8  -6   4  514.05   21.20
   8  -6   4  501.75   16.00
   8   6  -4  537.55   14.60
  -8  -6  -4  523.95   17.90
  -8  -6  -4  561.74   22.40
   8   6  -4  541.25   14.60
  -8   6   4  500.05   20.70
   8  -6  -4  531.15   18.60
   8  -6  -4  519.65   18.70
  -8  -6   4  515.45   21.30
   8  -6  -4  521.95   18.20
   8  -6  -4  538.55   20.70
  -8   6  -4  522.45   21.40
  -8  -6   4  522.85   19.20
  -8   6  -4  549.85   16.30
   8   6   4  526.35   20.50
  -8   6  -4  539.35   15.90
   8   6   4  520.95   18.00
   8   6   4  482.85   18.80
  -8   8   4  563.34   21.10
   8  -8   4  612.84   25.40
   8   8  -4  567.04   21.70
  -8  -8  -4  587.04   25.50
  -8  -8  -4  583.24   22.80
   8   8  -4  575.14   24.40
  -8  -8  -4  536.75   19.00
   8  -8   4  539.45   18.00
  -8   8  -4  593.74   18.70
   8   8   4  557.84   19.30
  -8  -8   4  548.95   24.50
   8   8   4  555.24   25.00
   8  -8  -4  588.74   24.00
   8  -8  -4  573.34   20.10
  -8   8  -4  592.14   24.90
   8   8   4  573.24   23.00
  -8  10   4  134.99   11.70
   8  10  -4  130.79    9.20
   8 -10   4  120.89    6.60
   8 -10   4  132.49   11.80
  -8  10   4  149.09    9.40
  -8 -10  -4  143.99    7.10
   8  10  -4  140.99   11.90
  -8 -10  -4  142.69   12.50
  -8 -10  -4  135.19   10.60
   8  10   4  135.89   12.20
   8  10   4  133.09    6.80
  -8  10  -4  124.79   11.50
  -8  10  -4  122.99    6.70
  -8 -10   4  137.89   11.70
   8  10   4  148.49   10.70
   8 -10  -4  134.89    7.40
   8 -10  -4  141.89   11.40
  -8 -12  -4  190.98   13.90
  -8  12   4  187.18   15.60
   8  12  -4  190.48   15.30
  -8 -12  -4  162.08   18.40
   8 -12   4  160.48   16.60
  -8  12   4  174.98   11.20
   8  12  -4  165.78   11.40
   8  12   4  167.58   12.40
  -8  12  -4  179.28   16.50
  -8 -12   4  187.08   15.30
   8 -12  -4  188.78   14.70
   8  12   4  167.28   19.10
  -8  12  -4  167.28    8.20
   8  14  -4   21.10    6.60
  -8 -14  -4   24.90    7.90
  -8 -14  -4   22.80    7.20
   8  14  -4   33.20    5.90
   8 -14   4   27.70    7.40
  -8  14   4   25.90    5.50
  -8  14   4   30.30    8.30
   8  14   4   19.60    5.90
  -8  14  -4   14.20    5.90
  -8 -14   4   35.60    8.30
   8 -14  -4   23.90    6.90
   8   0   6    1.50    1.10
   8   0  -6    1.30    1.10
  -8   0  -6    1.40    0.60
   8   0   6    1.30    1.00
  -8   0  -6    2.00    1.00
   8   0   6    1.40    0.60
   8   0  -6    1.10    1.00
  -8   0  -6    0.60    1.10
  -8   0   6    1.70    0.70
   8   0  -6    0.50    0.60
  -8   0   6    1.30    0.90
  -8   0  -6    2.00    1.20
  -8   0   6    4.70    1.60
  -8   0   6    0.60    0.70
   8   0   6    1.00    0.90
   8   0  -6    2.00    1.20
   8  -2   6 1420.06   42.90
   8   2  -6 1463.15   40.80
  -8  -2  -6 1468.05   38.00
  -8   2   6 1507.25   43.40
  -8  -2  -6 1465.85   44.10
   8   2  -6 1466.75   42.80
  -8   2   6 1469.75   42.20
  -8  -2  -6 1465.55   38.00
  -8  -2  -6 1375.86   44.50
   8   2  -6 1446.16   41.90
   8  -2   6 1467.15   42.40
  -8  -2  -6 1468.25   44.70
   8   2  -6 1386.76   42.80
  -8   2  -6 1496.05   43.50
  -8   2  -6 1512.45   41.40
   8  -2  -6 1424.76   41.50
   8  -2  -6 1534.85   43.40
   8  -2  -6 1455.75   41.70
   8  -2  -6 1487.15   43.10
  -8  -2   6 1471.35   43.30
   8   2   6 1420.26   43.00
  -8  -2   6 1445.86   42.10
  -8   2  -6 1436.06   42.20
  -8  -2   6 1430.66   40.50
  -8  -2   6 1424.76   42.60
   8   2   6 1494.65   43.30
   8   2   6 1391.66   43.40
  -8   2  -6 1495.05   41.40
  -8   2  -6 1432.66   41.70
   8  -2  -6 1440.46   42.20
  -8   4   6  230.48   10.60
  -8   4   6  231.08   10.80
   8   4  -6  240.78   10.50
   8   4  -6  227.18   10.20
  -8  -4  -6  182.78    7.90
   8   4  -6  224.48   11.30
  -8  -4  -6  181.68   11.10
  -8  -4  -6  186.28    8.10
  -8  -4  -6  177.98   10.90
  -8   4   6  232.38   10.50
   8  -4   6  234.88   11.10
   8  -4   6  242.68   11.30
  -8   4   6  223.08   10.40
   8  -4   6  238.28    9.40
  -8  -4  -6  173.18   10.80
  -8  -4  -6  174.38    9.50
   8   4  -6  234.28    9.00
   8  -4  -6  209.28   10.20
   8  -4  -6  207.88   10.10
   8   4   6  199.18   10.00
   8  -4  -6  205.78   10.00
  -8   4  -6  204.48   10.40
  -8   4  -6  214.78    9.10
  -8  -4   6  246.98   10.60
  -8   4  -6  231.28   11.30
   8   4   6  209.68   10.90
  -8   4  -6  207.08    8.40
  -8   4  -6  217.88    8.50
  -8   6   6  501.05   18.30
   8   6  -6  484.25   14.70
  -8  -6  -6  448.76   17.20
   8  -6   6  439.36   15.30
   8  -6   6  453.65   16.20
  -8  -6  -6  455.75   17.00
  -8  -6  -6  415.16   17.10
  -8  -6  -6  452.95   20.70
  -8   6   6  497.95   20.10
  -8   6   6  463.85   18.30
   8   6  -6  485.45   19.30
   8   6  -6  465.05   18.00
   8  -6   6  444.96   19.80
   8   6  -6  462.55   14.70
   8   6   6  418.56   18.80
  -8   6  -6  464.75   15.30
   8  -6  -6  473.95   19.00
  -8  -6   6  500.25   20.80
  -8   6  -6  463.35   20.00
  -8   6  -6  455.35   15.30
   8   6   6  438.46   17.40
   8  -6  -6  474.05   17.90
   8  -8   6  570.04   24.80
  -8  -8  -6  523.75   21.00
  -8  -8  -6  533.05   25.00
   8  -8   6  519.55   17.50
  -8   8   6  504.45   21.00
  -8   8   6  506.65   23.50
  -8  -8  -6  505.15   19.50
   8  -8   6  551.94   15.70
   8   8  -6  541.35   23.60
   8   8  -6  531.95   20.90
  -8  -8   6  518.75   24.00
   8   8   6  534.95   20.00
  -8   8  -6  539.85   17.60
   8  -8  -6  529.95   22.50
   8  -8  -6  534.55   20.70
  -8   8  -6  541.95   24.00
  -8   8  -6  533.75   15.40
  -8 -10  -6  434.96   20.40
   8  10  -6  444.06   22.80
   8  10  -6  473.35   19.80
  -8  10   6  449.06   23.30
   8 -10   6  468.85   23.80
   8 -10   6  404.76   15.30
  -8 -10  -6  445.46   24.50
  -8 -10   6  419.06   22.70
   8 -10  -6  430.96   18.00
  -8  10  -6  439.36   23.20
   8  10   6  438.06   21.10
  -8  10  -6  449.95   15.70
   8  10   6  450.85   17.50
   8 -10  -6  448.46   21.90
  -8 -12  -6  189.88   17.10
   8  12  -6  241.28   13.80
  -8 -12  -6  187.28    9.90
  -8  12   6  227.78   13.60
   8  12  -6  247.08   17.60
  -8 -12  -6  218.18   15.00
   8 -12   6  215.78   17.10
  -8  12  -6  207.58    9.10
  -8 -12   6  241.18   17.80
   8 -12  -6  228.88   16.20
   8 -12  -6  216.98   11.00
   8  12   6  214.98   14.70
  -8  12  -6  215.08   16.90
  -8  14   6   91.49    9.50
   8 -14   6   92.39   11.40
   8  14  -6   90.49   14.20
  -8 -14  -6   83.09   14.40
  -8  14   6  106.39   13.20
   8  14  -6   89.79    9.00
  -8 -14  -6   89.59   11.00
   8 -14  -6   96.89   11.30
  -8 -14   6  101.19   12.50
   8  14   6   95.89   10.70
   8 -14  -6  105.39   13.30
  -8   0  -8 2285.77   65.29
   8   0   8 2236.28   60.99
   8   0   8 2157.48   64.99
  -8   0   8 2263.17   65.39
  -8   0   8 2236.88   64.19
  -8   0  -8 2331.77   64.69
   8   0  -8 2303.57   65.09
  -8   0  -8 2271.57   65.59
   8   0  -8 2394.76   65.99
   8   0  -8 2387.66   62.39
   8   0   8 2153.98   65.09
  -8   0  -8 2279.67   60.99
   8   0  -8 2281.17   64.29
  -8   0   8 2223.48   62.19
   8   0   8 2207.68   64.59
   8   0  -8 2394.76   65.79
  -8  -2  -8 2106.89   55.69
   8  -2   8 2109.09   61.29
   8   2  -8 1980.50   61.19
  -8   2   8 2151.18   60.59
  -8  -2  -8 2118.89   55.69
  -8   2   8 2188.48   62.49
   8  -2   8 2124.89   61.79
  -8  -2  -8 2148.98   63.09
   8   2  -8 2071.79   60.59
   8  -2   8 2195.98   60.09
   8   2  -8 2105.79   60.79
   8   2  -8 2166.88   61.99
   8  -2  -8 2052.09   60.39
   8  -2  -8 2271.57   62.89
  -8   2  -8 2098.99   59.79
  -8   2  -8 2138.09   60.29
   8   2   8 2071.49   62.29
  -8  -2   8 2061.49   61.39
  -8  -2   8 2172.78   61.99
  -8   2  -8 2223.98   62.49
   8   2   8 2122.39   62.29
  -8   2  -8 2177.88   60.59
   8  -2  -8 2187.68   60.29
  -8  -2   8 2153.18   59.09
  -8  -2   8 2183.48   61.39
   8  -2  -8 2064.89   60.19
  -8   2  -8 2183.38   61.49
   8   2   8 2135.19   62.19
   8  -4   8 1816.62   51.39
   8   4  -8 1621.04   55.19
  -8  -4  -8 1824.72   48.30
   8   4  -8 1675.73   51.39
  -8  -4  -8 1831.62   55.29
  -8   4   8 1779.92   51.99
  -8   4   8 1751.92   53.39
   8  -4   8 1843.82   53.49
  -8  -4  -8 1838.82   48.50
  -8   4   8 1742.73   53.29
   8   4  -8 1761.32   52.69
  -8   4  -8 1828.52   50.69
  -8  -4   8 1773.92   51.19
   8   4   8 1817.02   54.29
  -8   4  -8 1850.21   54.29
   8  -4  -8 1615.04   51.59
  -8   4  -8 1780.12   51.39
  -8   4  -8 1740.33   52.79
  -8   4  -8 1800.12   50.49
   8   4   8 1799.62   53.39
   8  -4  -8 1654.23   52.49
  -8  -4   8 1740.43   53.99
   8  -4  -8 1709.43   52.79
  -8  -6  -8  279.07   11.60
  -8   6   8  271.97   13.60
   8  -6   8  268.87   14.70
  -8   6   8  274.07   13.90
  -8  -6  -8  288.57   15.90
   8   6  -8  260.37   10.80
  -8  -6  -8  275.97   11.40
   8   6  -8  279.77   13.90
   8  -6   8  270.77   11.30
   8   6  -8  276.57   13.30
   8   6  -8  278.67   11.00
  -8   6  -8  269.67   14.80
  -8   6  -8  268.97   11.10
  -8  -6   8  283.37   15.30
   8  -6  -8  273.47   14.70
   8   6   8  277.07   13.60
   8   6   8  264.77   14.40
  -8   6  -8  260.17   11.00
   8  -6  -8  268.37   13.40
  -8   6  -8  257.87   11.10
   8   8  -8   42.40    5.40
   8  -8   8   42.10    4.00
   8   8  -8   39.90    6.70
   8   8  -8   40.30    2.80
   8  -8   8   49.00    8.30
  -8  -8  -8   43.30    7.30
  -8   8   8   34.30    8.30
   8   8  -8   43.90    2.90
  -8   8   8   40.80    6.20
  -8  -8  -8   44.00    4.90
   8  -8   8   46.40    4.50
  -8   8  -8   35.70    3.70
   8  -8  -8   34.00    5.90
   8  -8  -8   54.89    8.50
  -8   8  -8   35.50    6.60
  -8   8  -8   40.40    3.50
   8   8   8   35.40    6.50
  -8   8  -8   43.20    4.00
  -8  -8   8   35.30    6.80
   8   8   8   42.10    5.20
  -8  10   8  498.75   22.70
   8  10  -8  509.75   21.70
  -8 -10  -8  493.45   24.30
  -8 -10  -8  504.55   26.80
   8 -10   8  490.85   25.60
   8  10  -8  504.45   24.80
   8  10   8  513.15   24.20
  -8 -10   8  516.65   26.30
   8  10   8  482.35   20.50
   8 -10  -8  528.05   26.70
   8 -10  -8  515.35   21.90
  -8  10  -8  516.35   25.80
  -8  10  -8  499.95   17.70
   8 -10  -8  521.65   24.00
  -8  12   8   29.00    6.30
   8  12  -8   31.30    5.80
   8 -12   8   35.60    8.80
  -8 -12  -8   23.30    5.80
  -8 -12  -8   31.60    8.70
   8 -12  -8   25.10    6.50
   8 -12  -8   30.20    8.40
  -8  12  -8   31.80    7.20
   8  12   8   24.80    6.00
  -8  12  -8   26.80    3.40
   8  12   8   28.60    4.90
  -8 -12   8   30.90    7.70
   8   0  10    1.30    1.00
  -8   0 -10    3.50    1.10
  -8   0  10    2.20    1.40
   8   0 -10    0.70    1.30
  -8   0 -10    2.90    1.90
   8   0  10    0.80    1.50
   8   0 -10    0.40    0.80
   8   0 -10    2.20    1.50
  -8   0  10    3.10    1.60
  -8   0  10   -0.30    1.30
   8   0  10    1.20    1.70
  -8   2  10  294.97   14.50
  -8   2  10  291.17   12.60
  -8  -2 -10  293.27    8.80
   8  -2  10  285.67   12.10
  -8  -2 -10  315.07   15.10
   8  -2  10  285.97   13.70
   8   2 -10  302.27   14.20
   8   2 -10  287.97   11.90
  -8  -2  10  265.47   11.60
  -8  -2  10  290.97   13.80
  -8   2 -10  278.07   13.00
   8  -2 -10  274.27   12.50
   8   2  10  308.87   14.50
  -8   2 -10  286.47   14.00
  -8  -2  10  284.07   13.70
   8   2  10  294.47    8.70
   8  -2 -10  294.27   12.70
   8   2  10  289.27   14.40
   8  -2 -10  299.37   12.90
  -8   2 -10  275.27   12.00
   8  -2 -10  303.87   14.80
   8   4 -10  119.59    7.70
   8  -4  10  138.29    8.90
   8   4 -10  122.79    8.60
   8  -4  10  132.19    8.20
  -8  -4 -10  126.69    5.20
  -8   4  10  114.39    8.80
  -8  -4 -10  120.69    5.20
  -8   4  10  120.19    7.70
  -8  -4 -10  129.69    9.90
   8   4  10  126.59    9.10
   8  -4 -10  124.49    8.50
  -8   4 -10  136.29    7.90
  -8  -4  10  119.09    9.00
  -8   4 -10  134.59    9.50
   8  -4 -10  131.39    9.40
   8   4  10  134.29    9.60
   8  -4 -10  117.69    7.80
  -8  -4  10  129.39    8.10
  -8  -4  10  124.69    7.70
  -8   4 -10  142.59    8.10
  -8   6  10   78.59    7.70
  -8  -6 -10   76.39    5.20
  -8  -6 -10   82.69    5.30
   8   6 -10   74.89    7.00
   8   6 -10   71.79    6.00
   8   6 -10   84.99    7.20
  -8   6  10   76.99    8.40
   8  -6  10   87.49    6.30
   8  -6  10  104.39    9.00
  -8   6  10   81.09    7.00
  -8  -6 -10   93.39    9.20
  -8   6 -10   77.99    8.00
  -8   6 -10   85.39    6.30
   8  -6 -10   91.19    8.10
  -8   6 -10   90.09    6.30
  -8  -6  10   81.39    8.30
   8   6  10   73.19    7.30
  -8  -6  10   75.69    6.00
  -8   6 -10   87.39    6.40
   8   6  10   93.39    8.50
   8   8 -10  877.71   27.00
  -8  -8 -10  858.51   29.40
   8  -8  10  896.61   28.00
  -8  -8 -10  884.61   36.70
   8  -8  10  952.20   36.30
  -8   8  10  871.11   32.70
  -8  -8 -10  796.42   30.40
  -8   8  10  863.71   33.50
   8   8 -10  906.31   33.90
   8   8 -10  880.31   27.20
  -8  -8  10  902.01   36.10
   8   8  10  886.41   32.60
  -8   8 -10  832.22   28.30
  -8   8 -10  904.61   28.80
  -8   8 -10  867.01   27.80
   8  -8 -10  901.31   35.70
  -8   8 -10  889.41   35.40
   8  -8 -10  890.41   32.60
   8   8  10  861.51   34.60
   8  10 -10   98.69    8.60
  -8 -10 -10  111.49   12.10
   8  10 -10   97.19   10.00
  -8  10  10   86.49    9.30
  -8 -10 -10   92.89    8.10
   8 -10  10  105.29   11.20
  -8 -10  10  103.29   11.50
   8 -10 -10  108.99    9.90
   8 -10 -10   81.79    8.90
   8  10  10   98.69    8.70
  -8  10 -10   95.99   10.80
   8  10  10   89.79   10.00
   8 -10 -10   82.89   10.30
  -8  10 -10  102.39    6.70
  -8 -12 -10  194.68   13.30
   8  12 -10  232.28   17.30
   8  12 -10  221.08   13.70
  -8 -12 -10  206.98   18.40
   8 -12  10  211.68   17.20
  -8  12  10  191.98   14.40
   8  12  10  191.98   12.20
   8 -12 -10  181.78   14.30
   8 -12 -10  187.38   13.00
  -8 -12  10  210.48   17.50
   8  12  10  172.68   14.90
   8 -12 -10  169.48   16.10
  -8  12 -10  215.58   17.30
  -8   0  12 1377.66   44.00
  -8   0 -12 1289.67   42.90
   8   0  12 1333.97   37.60
   8   0 -12 1307.97   39.50
   8   0 -12 1344.97   44.00
  -8   0 -12 1185.08   37.10
  -8   0  12 1339.57   41.30
  -8   0 -12 1272.87   42.70
   8   0  12 1287.77   43.40
  -8  -2 -12  731.83   21.40
  -8  -2 -12  781.92   29.10
  -8   2  12  737.53   28.60
   8   2 -12  758.82   28.10
   8   2 -12  716.73   24.70
   8  -2  12  742.03   27.60
   8  -2  12  708.53   24.50
  -8   2  12  761.02   25.60
   8  -2 -12  709.33   25.80
   8  -2 -12  696.13   25.10
  -8   2 -12  744.83   27.80
  -8  -2  12  703.83   27.20
  -8  -2  12  719.53   26.90
  -8  -2  12  675.33   24.40
   8   2  12  740.23   20.40
   8   2  12  741.23   28.50
  -8   2 -12  679.23   24.40
  -8   2 -12  736.73   26.90
   8  -2 -12  758.52   25.90
   8   2  12  754.42   37.00
   8  -2 -12  704.63   28.20
  -8  -4 -12  191.98   17.40
   8   4 -12  222.28   11.70
   8   4 -12  204.58   14.30
  -8   4  12  242.88   11.80
  -8   4  12  221.88   13.60
   8  -4  12  210.38   12.00
  -8  -4 -12  219.08    7.20
   8  -4  12  227.88   12.50
  -8  -4  12  241.88   13.80
  -8  -4  12  243.08   12.70
   8  -4 -12  235.58   14.20
  -8   4 -12  219.48   13.30
   8   4  12  231.68   13.90
   8   4  12  222.18   13.60
   8  -4 -12  232.48   12.80
  -8   4 -12  204.68   11.50
  -8   6  12 1484.75   50.39
   8   6 -12 1564.44   49.20
  -8  -6 -12 1405.26   42.10
  -8   6  12 1435.96   50.29
  -8   6  12 1447.56   46.80
   8   6 -12 1516.95   48.50
   8  -6  12 1447.66   46.50
  -8  -6 -12 1497.45   44.10
  -8  -6 -12 1561.34   53.19
   8  -6  12 1514.05   50.19
  -8  -6  12 1564.94   51.89
  -8  -6  12 1501.25   46.60
  -8   6 -12 1550.84   46.70
   8   6  12 1439.06   49.90
   8   6  12 1433.36   51.09
   8  -6 -12 1512.45   51.49
  -8   6 -12 1528.75   51.19
   8   8 -12   -0.40    1.60
  -8  -8 -12   16.70    5.60
  -8   8  12    6.60    3.20
   8   8 -12    3.40    3.10
   8  -8  12    1.60    1.70
  -8  -8 -12    1.30    2.00
   8   8 -12    3.10    2.60
  -8  -8 -12    1.20    1.60
   8  -8  12    3.10    2.80
  -8   8  12   -0.30    2.30
  -8   8 -12    4.20    2.00
   8   8  12   -1.30    2.00
  -8  -8  12   -2.40    2.40
   8   8  12    6.10    3.10
   8  -8 -12    0.60    2.50
  -8   8 -12    6.70    3.80
  -8  10  12   18.60    5.40
  -8 -10 -12   27.70    7.40
  -8 -10 -12   21.80    4.50
   8 -10  12   15.20    2.50
   8  10 -12   15.20    4.60
  -8  10  12   24.50    5.70
   8  10 -12   21.60    6.20
  -8  10 -12   20.60    4.00
   8 -10 -12   24.40    5.60
   8 -10 -12   18.90    5.50
  -8 -10  12   24.60    6.70
  -8  10 -12   29.50    7.20
   8  10  12   15.20    6.30
   8  10  12   23.90    5.70
   8 -10 -12   17.60    4.50
  -8 -12 -12   50.39    7.20
   8  12 -12   40.90    7.40
  -8  12  12   43.40    8.20
   8  12 -12   39.40    8.20
   8 -12  12   40.10    9.50
  -8 -12 -12   44.10    9.50
   8  12  12   47.20    9.20
   8  12  12   35.80    6.40
   8 -12 -12   36.90    9.20
   8 -12 -12   41.60    7.60
  -8 -12  12   41.50    9.20
   8 -12 -12   37.40    7.30
  -8  12 -12   53.59   10.20
   8 -12 -12   43.50    8.00
  -8   0  14    0.70    1.70
   8   0  14    3.70    1.30
  -8   0  14    1.60    2.10
  -8   0  14    3.20    2.20
   8   0  14    0.90    2.20
  -8   0 -14    1.30    1.40
  -8   0 -14    3.00    2.60
   8   0 -14    3.20    2.20
  -8   0 -14    1.30    2.10
   8   0 -14    1.80    1.50
   8  -2  14   31.40    5.80
   8   2 -14   26.70    5.60
  -8  -2 -14   26.40    2.40
  -8   2  14   27.80    5.50
   8   2 -14   26.60    4.50
  -8   2  14   26.20    4.40
  -8  -2 -14   26.50    5.80
   8  -2  14   26.70    4.30
  -8   2 -14   28.90    5.70
  -8   2 -14   25.20    6.20
  -8   2 -14   27.40    4.30
   8   2  14   26.20    1.90
   8  -2 -14   37.60    6.60
  -8  -2  14   21.70    4.90
   8  -2 -14   32.90    5.10
  -8  -2  14   23.10    4.90
   8   2  14   29.60    5.90
   8   2  14   29.50    6.00
  -8  -4 -14   95.79    9.70
   8  -4  14   91.39    8.40
   8  -4  14   84.89    7.70
  -8   4  14   85.39    6.90
  -8   4  14   96.59    9.40
   8   4 -14   98.29    9.00
   8   4 -14   87.89    7.30
   8  -4 -14   81.59    7.80
  -8   4 -14  100.59    9.00
  -8  -4  14  100.59    9.20
   8   4  14   79.19    8.60
   8   4  14   75.49    8.40
  -8  -4  14   99.99    8.60
   8  -4 -14  105.49   10.10
   8  -6  14   63.79    6.60
  -8  -6 -14   63.79   10.30
   8   6 -14   78.19    8.10
  -8  -6 -14   57.09    3.00
   8  -6  14   58.89    7.50
  -8   6  14   60.09    6.00
  -8   6  14   61.69    8.20
   8   6  14   67.09    8.40
  -8   6 -14   67.49    8.30
  -8  -6  14   55.99    6.10
   8  -6 -14   71.39    8.80
  -8   6 -14   70.29    6.90
  -8  -6  14   70.49    8.40
   8  -6 -14   64.59    7.80
   8   6  14   57.99    7.70
  -8  -8 -14   86.69    5.50
   8  -8  14  115.79   11.30
   8   8 -14   98.29    9.30
   8   8 -14   79.99    7.30
  -8  -8 -14   82.79   10.50
  -8   8  14   94.29   10.00
   8  -8  14   79.59    7.30
   8   8 -14  100.59    9.60
  -8  -8  14   94.19   11.00
   8  -8 -14   78.49    7.70
   8   8  14   92.99    9.90
  -8   8 -14   94.89    8.00
   8  -8 -14   90.49   10.20
  -8   8 -14   83.79   10.00
   8   8  14   73.49    9.80
   8  -8 -14   89.49   10.10
   8 -10  14   36.10    4.90
   8  10 -14   57.09    9.40
   8  10 -14   63.49    7.90
  -8  10  14   51.99    9.10
  -8 -10 -14   45.20    9.90
  -8 -10 -14   49.40    5.20
   8 -10  14   34.40    8.00
  -8  10 -14   45.90    5.90
  -8 -10  14   41.30    9.30
   8  10  14   41.10    8.70
   8 -10 -14   46.00    8.80
   8 -10 -14   53.59   10.10
  -8  10 -14   43.30    8.70
   8 -10 -14   46.90    7.70
   8  10  14   33.10    7.20
  -8   0  16  595.94   27.10
  -8   0 -16  605.94   26.10
  -8   0 -16  518.95   19.40
   8   0 -16  584.84   26.90
   8   0  16  597.24   19.70
   8   0 -16  579.94   22.60
   8   0  16  621.44   27.60
  -8   0  16  624.74   23.90
  -8   0 -16  605.24   26.70
  -8   2  16  270.67   17.00
   8   2 -16  273.17   16.60
  -8  -2 -16  262.07   16.30
   8   2 -16  260.67   13.40
   8  -2  16  279.57   13.10
  -8  -2 -16  253.57   16.50
  -8   2  16  256.97   13.10
   8  -2  16  271.27   16.50
   8  -2 -16  268.47   16.90
   8  -2 -16  276.37   14.30
  -8  -2  16  275.77   16.50
  -8   2 -16  257.07   15.70
  -8   2 -16  276.97   16.10
   8   2  16  255.07   16.90
  -8  -2  16  267.67   14.90
   8   4 -16  207.98   14.20
  -8   4  16  193.68   14.70
   8   4 -16  203.38   12.10
  -8  -4 -16  198.28   15.00
  -8   4  16  217.88   11.60
   8  -4  16  224.58   14.10
   8  -4 -16  198.88   13.10
  -8  -4  16  199.38   13.50
   8   4  16  211.78   15.00
  -8   4 -16  227.08   13.90
   8  -4 -16  205.68   15.30
  -8   4 -16  209.38   14.40
   8   4  16  201.38   15.00
  -8  -4  16  212.98   14.10
   8   6 -16  273.57   15.60
  -8  -6 -16  262.77   18.70
   8   6 -16  304.77   17.70
   8  -6  16  278.37   17.00
   8  -6  16  289.67   16.10
  -8   6  16  318.27   19.50
   8   6  16  297.77   21.40
  -8   6 -16  272.47   15.50
   8  -6 -16  304.87   19.60
   8  -6 -16  281.27   14.50
   8   6  16  301.17   18.90
  -8   6 -16  299.67   18.30
   8  -6 -16  302.67   18.10
  -8  -6  16  274.37   18.00
  -8  -6  16  287.37   16.00
   8   8 -16   67.29    7.40
   8  -8  16   58.79    6.90
   8  -8  16   74.49    9.50
  -8  -8 -16   73.29   11.70
  -8   8  16   69.79    9.60
   8   8 -16   71.79    8.50
   8   8 -16   70.59    8.30
   8  -8 -16   54.69    9.20
   8  -8 -16   75.29    7.70
  -8  -8  16   84.29   10.80
   8   8  16   77.89   10.00
  -8   8 -16   65.29    7.20
   8   8  16   69.89    9.50
  -8   8 -16   61.69   10.00
   8  -8 -16   55.49   10.00
  -8   0  18   -0.30    2.70
  -8   0 -18   -1.30    2.20
  -8   0 -18   -0.30    2.80
   8   0  18   -0.40    1.30
   8   0 -18   -1.30    1.80
   8   0 -18   -4.10    2.30
   8   0  18    2.30    2.30
  -8  -2 -18  309.87   18.50
  -8   2  18  272.37   14.00
  -8   2  18  268.87   18.30
  -8  -2 -18  292.27   18.90
   8   2 -18  268.57   14.40
   8  -2  18  280.37   18.10
   8  -2  18  302.97   13.90
   8   2 -18  315.57   19.20
  -8  -2  18  275.97   15.90
   8  -2 -18  284.27   15.40
  -8   2 -18  281.37   17.30
   8   2  18  309.27   19.90
  -8  -2  18  284.67   18.00
  -8   2 -18  289.77   17.80
   8  -2 -18  280.67   18.60
   8  -4  18   31.00    6.50
  -8   4  18   29.50    5.00
   8   4 -18   22.30    5.20
  -8   4  18   29.50    7.30
   8  -4  18   30.10    5.30
   8   4 -18   30.00    7.20
  -8  -4 -18   26.60    7.20
  -8  -4 -18   27.70    7.50
  -8   4 -18   31.60    6.70
   8  -4 -18   36.00    8.10
   8  -4 -18   30.10    6.20
   8   4  18   28.30    6.70
  -8  -4  18   34.50    6.80
  -8   4 -18   31.10    6.40
  -8  -4  18   27.60    6.00
   8   6 -18  126.79   10.50
  -8   6  18  113.79   12.40
   8   6 -18  118.39   11.70
   8  -6  18  104.89   10.60
   8  -6  18  116.49   10.60
  -8  -6 -18  120.09   13.00
   8  -6 -18  136.49   12.10
  -8  -6  18  119.69   11.70
   8  -6 -18  121.79    8.90
   8   6  18  111.09   12.20
   8   6  18   98.89   11.70
  -8   6 -18  145.69   12.80
  -8  -6  18  105.89   10.00
  -8   6 -18  131.19   11.00
   8  -6 -18  129.79   13.40
   8   8 -18   -4.20    3.90
   8   8 -18    4.10    3.90
   8   8 -18    0.30    3.30
  -8   8  18    2.00    3.90
  -8  -8 -18   10.40    6.10
   8  -8  18    2.90    3.10
   8  -8  18    3.90    4.00
  -8   8 -18    0.90    3.80
  -8   8 -18    3.50    3.80
   8  -8 -18   -4.00    3.70
  -8  -8  18    9.90    5.20
   8  -8 -18    0.00    4.60
   8   8  18    5.00    4.30
   8  -8 -18    1.20    3.50
   8   8  18    2.70    3.40
   8   0 -20   39.30    8.50
  -8   0 -20   47.20    8.30
   8   0 -20   63.89    7.20
  -8   0  20   59.29   10.40
   8   0  20   58.99   10.80
  -8   0 -20   71.09   11.30
  -8   0  20   52.49    6.60
   8   2 -20   32.00    8.00
  -8   2  20   26.90    5.00
  -8   2  20   23.60    6.70
   8   2 -20   32.10    5.60
   8  -2  20   35.10    5.10
  -8  -2 -20   38.10    7.70
  -8  -2 -20   38.90    8.50
   8  -2  20   27.10    6.70
   8  -2 -20   33.90    8.20
   8  -2 -20   33.90    6.00
  -8  -2  20   31.70    7.20
  -8   2 -20   32.60    7.20
   8   2  20   30.70    7.80
  -8   2 -20   36.00    7.50
  -8  -2  20   41.80    7.10
  -8   4  20    2.50    2.70
  -8  -4 -20    3.40    4.20
   8   4 -20    4.40    3.40
   8   4 -20    3.70    4.00
  -8   4  20    4.50    4.00
   8  -4  20    0.90    3.00
  -8  -4 -20   11.40    5.50
   8  -4  20    3.30    3.80
   8  -4 -20    4.40    3.50
   8   4  20    1.40    3.60
  -8  -4  20    1.10    3.60
  -8  -4  20    2.90    4.00
  -8   4 -20    2.50    3.80
  -8   4 -20   12.40    3.90
   8  -4 -20    4.70    4.20
  -9  -1  -1  501.55   14.30
   9  -1   1  507.15   15.10
  -9   1   1  488.15   14.30
  -9  -1  -1  509.45   15.30
   9  -1   1  487.75   14.90
  -9   1   1  455.85   14.70
   9   1  -1  490.15   14.60
   9  -1   1  506.45   14.90
  -9  -1  -1  497.65   14.90
  -9  -1  -1  481.45   15.00
  -9   1   1  468.25   14.10
   9   1  -1  472.05   15.00
   9   1  -1  484.35   15.00
  -9   1   1  478.85   15.20
   9  -1   1  497.75   13.60
  -9  -1   1  490.15   14.60
  -9  -1   1  500.35   14.20
  -9  -1   1  488.35   15.00
   9  -1  -1  480.65   15.10
  -9   1  -1  490.65   13.50
   9   1   1  498.65   15.20
   9   1   1  466.55   14.80
   9  -1  -1  477.25   14.20
   9  -1  -1  451.15   14.10
  -9   1  -1  489.85   14.90
  -9   1  -1  488.35   15.00
  -9  -1   1  489.95   14.20
   9  -1  -1  457.55   14.80
  -9  -1   1  495.85   15.30
   9   1   1  495.35   14.20
  -9   1  -1  493.25   15.00
   9   1   1  487.25   15.10
   9  -3   1 2598.24   70.49
   9  -3   1 2535.95   68.39
   9   3  -1 2668.33   70.29
  -9  -3  -1 2544.15   70.79
  -9   3   1 2467.45   68.59
   9  -3   1 2643.84   70.79
  -9  -3  -1 2512.35   69.39
   9  -3   1 2576.44   70.69
  -9  -3  -1 2536.05   70.19
  -9   3   1 2543.55   70.39
  -9   3   1 2591.34   67.79
  -9  -3  -1 2479.25   68.29
  -9   3   1 2581.74   70.69
   9   3  -1 2533.45   70.19
   9   3  -1 2541.65   67.79
   9   3   1 2567.94   69.39
   9   3   1 2541.45   70.39
  -9   3  -1 2532.45   70.49
   9   3   1 2655.83   71.19
  -9  -3   1 2583.54   69.89
   9  -3  -1 2523.85   67.69
   9  -3  -1 2580.84   70.19
  -9  -3   1 2566.54   71.99
   9   3   1 2598.04   68.49
   9  -3  -1 2545.15   68.69
   9  -3  -1 2539.75   70.49
   9  -3  -1 2579.14   68.79
  -9   3  -1 2502.55   68.19
  -9  -3   1 2538.75   69.89
  -9  -3   1 2594.44   67.79
   9   5  -1  351.66   14.80
   9  -5   1  352.56   14.90
   9  -5   1  338.67   15.00
   9   5  -1  344.97   13.80
  -9  -5  -1  344.17   14.10
  -9  -5  -1  346.77   15.50
   9   5  -1  348.97   10.50
   9  -5   1  344.67   11.00
   9  -5   1  338.37   14.80
  -9  -5  -1  350.26   11.60
  -9  -5  -1  351.76   15.00
   9  -5   1  347.87   11.60
  -9   5   1  376.46   15.30
   9   5  -1  324.57   14.10
  -9   5   1  370.46   12.00
   9  -5  -1  351.56   14.90
  -9  -5   1  375.46   12.40
   9   5   1  367.76   14.50
   9   5   1  361.66   11.60
   9   5   1  364.76   14.20
   9  -5  -1  366.26   12.20
   9  -5  -1  369.06   12.20
   9  -5  -1  376.56   12.20
  -9  -5   1  364.36   14.90
  -9   5  -1  327.37   14.70
   9  -5  -1  359.66   14.90
  -9  -5   1  362.16   14.70
   9   5   1  366.06   15.50
   9  -5  -1  361.86   15.20
  -9   5  -1  334.17   10.90
  -9   5  -1  344.37   11.40
  -9  -5   1  359.96   14.00
  -9  -7  -1  777.22   27.20
   9  -7   1  787.72   21.30
  -9   7   1  721.63   23.10
   9  -7   1  739.73   22.30
  -9   7   1  714.53   27.60
   9  -7   1  782.42   28.20
   9   7  -1  697.03   25.50
   9   7  -1  678.13   27.20
   9  -7   1  759.72   21.30
  -9  -7  -1  725.03   21.40
   9  -7  -1  667.23   23.00
   9  -7  -1  717.53   22.40
   9   7   1  757.42   26.40
   9   7   1  795.72   28.80
   9  -7  -1  706.23   22.10
   9   7   1  787.12   21.40
  -9   7  -1  748.13   28.10
   9  -7  -1  689.23   27.20
  -9   7  -1  747.53   22.30
  -9  -7   1  753.22   27.60
   9  -9   1  532.45   17.80
   9   9  -1  487.95   23.60
  -9   9   1  539.95   24.40
  -9   9   1  531.15   18.70
   9  -9   1  547.15   24.20
  -9  -9  -1  526.05   23.30
   9   9  -1  516.25   21.30
   9   9   1  568.44   22.20
  -9   9  -1  508.65   17.60
   9  -9  -1  511.15   16.30
   9   9   1  567.94   25.20
  -9  -9   1  538.85   23.60
   9  -9  -1  486.65   18.70
  -9   9  -1  506.25   23.80
   9  -9  -1  528.25   23.60
   9  -9  -1  488.25   15.90
   9 -11   1  644.24   29.80
   9 -11   1  600.14   21.80
  -9  11   1  608.04   29.70
   9  11  -1  699.13   26.90
   9  11  -1  677.33   31.00
  -9 -11  -1  673.53   29.10
  -9  11   1  654.93   23.20
   9  11   1  621.34   30.40
   9  11   1  662.03   26.70
   9 -11  -1  668.53   29.90
  -9  11  -1  663.03   22.10
  -9 -11   1  652.33   29.50
  -9  11  -1  664.53   30.80
   9  13  -1   69.49    7.80
  -9  13   1   69.99   11.70
  -9  13   1   71.99    6.20
   9  13  -1   70.69   11.70
   9 -13   1   75.19   10.30
  -9  13  -1   71.89    5.60
   9  13   1   62.39   11.80
   9  13   1   63.29    7.90
   9 -13  -1   68.69   10.80
  -9 -13   1   74.59    9.70
  -9  13  -1   63.79   11.10
   9   1  -3 2564.24   69.19
   9   1  -3 2680.53   69.69
   9   1  -3 2643.84   67.19
   9  -1   3 2541.45   69.39
  -9  -1  -3 2634.44   69.59
  -9  -1  -3 2689.53   70.49
  -9  -1  -3 2699.33   66.79
  -9  -1  -3 2650.63   69.69
  -9   1   3 2391.16   69.39
  -9   1   3 2514.35   69.09
   9  -1   3 2502.75   68.49
   9   1  -3 2591.34   69.89
   9   1  -3 2619.14   69.09
   9  -1   3 2476.05   68.49
  -9   1   3 2533.95   67.69
   9  -1   3 2496.35   69.69
   9   1   3 2515.45   69.49
   9   1   3 2471.75   69.89
  -9   1  -3 2560.44   69.29
   9  -1  -3 2689.33   69.39
   9  -1  -3 2620.54   69.69
   9  -1  -3 2704.23   67.79
  -9  -1   3 2385.36   69.29
  -9   1  -3 2737.23   70.19
  -9  -1   3 2449.85   67.09
   9   1   3 2516.65   66.69
  -9  -1   3 2507.65   69.89
  -9  -3  -3 1517.75   44.40
  -9  -3  -3 1582.84   46.70
  -9  -3  -3 1500.25   45.40
  -9   3   3 1619.94   45.80
  -9   3   3 1611.74   45.20
   9   3  -3 1569.84   43.20
   9  -3   3 1605.84   43.90
   9   3  -3 1550.94   44.60
   9   3  -3 1547.65   43.10
  -9  -3  -3 1580.04   43.60
   9  -3   3 1641.74   46.00
  -9  -3  -3 1568.24   46.60
  -9   3   3 1623.14   44.40
   9   3  -3 1613.04   45.30
   9  -3   3 1647.44   45.90
   9   3  -3 1559.34   45.90
   9  -3  -3 1573.44   45.00
   9  -3  -3 1539.25   45.40
  -9   3  -3 1561.84   45.50
  -9   3  -3 1565.94   43.70
  -9  -3   3 1545.75   45.10
  -9   3  -3 1553.24   45.80
   9  -3  -3 1517.15   44.60
  -9  -3   3 1625.74   44.60
   9   3   3 1666.83   44.70
   9   3   3 1651.33   43.70
  -9   3  -3 1605.14   41.90
  -9   3  -3 1579.24   41.90
   9  -3  -3 1587.54   44.20
  -9  -3   3 1631.94   46.20
   9   3   3 1591.94   45.90
   9  -5   3  169.58    5.80
   9  -5   3  172.88    6.70
  -9  -5  -3  171.68    9.90
   9   5  -3  147.79    9.00
   9  -5   3  176.28    9.70
   9   5  -3  156.58    5.70
   9  -5   3  158.58    9.20
   9   5  -3  172.18    9.20
  -9  -5  -3  175.38    8.40
  -9   5   3  174.18    7.90
   9   5  -3  158.28    5.70
  -9  -5  -3  163.48    8.90
  -9   5   3  175.48    9.40
   9   5  -3  174.58    8.70
  -9  -5  -3  167.78    7.50
  -9  -5  -3  161.98    9.70
   9   5   3  181.08    9.40
   9  -5  -3  156.08    7.50
   9  -5  -3  160.18    7.80
  -9  -5   3  169.78    8.90
  -9   5  -3  170.18    9.70
   9  -5  -3  155.28    8.90
  -9   5  -3  156.88    9.10
   9  -5  -3  149.49    8.90
   9  -5  -3  159.28    9.10
   9   5   3  185.18    8.50
   9  -5  -3  158.58    7.60
  -9   5  -3  158.58    6.40
  -9   5  -3  165.48    5.90
  -9  -5   3  170.98    9.60
   9   5   3  190.48   10.50
   9   7  -3 1567.14   50.89
  -9  -7  -3 1593.34   45.60
   9  -7   3 1621.14   51.69
   9   7  -3 1620.04   48.80
  -9   7   3 1637.34   51.49
   9  -7   3 1545.95   44.20
   9  -7   3 1566.74   43.30
  -9   7   3 1591.24   47.10
  -9  -7  -3 1649.73   49.50
   9  -7  -3 1635.54   50.79
   9  -7  -3 1586.94   49.10
   9   7   3 1619.14   52.19
   9   7   3 1635.44   50.09
  -9   7  -3 1596.94   51.49
  -9  -7   3 1663.43   51.79
   9  -7  -3 1616.24   46.50
   9   7   3 1660.53   45.90
   9  -7  -3 1621.14   46.30
  -9   7  -3 1619.74   44.50
   9  -9   3  962.60   30.10
   9   9  -3 1076.99   38.90
  -9   9   3 1080.69   39.00
  -9  -9  -3 1016.80   36.50
  -9  -9  -3  948.61   30.10
   9  -9   3 1015.10   38.50
   9   9  -3 1118.29   35.60
  -9   9   3 1066.59   33.40
   9   9   3  990.10   38.90
   9  -9  -3 1015.00   31.00
   9  -9  -3 1057.09   37.90
   9  -9  -3 1029.10   31.40
  -9  -9   3 1129.49   39.30
  -9   9  -3  999.70   38.40
   9   9   3 1033.40   36.10
  -9   9  -3  907.61   34.50
   9   9   3 1067.49   32.30
  -9  11   3  207.58   11.10
  -9  11   3  211.68   15.50
  -9 -11  -3  195.78   13.60
   9  11  -3  209.08   12.50
   9 -11   3  165.58    8.40
   9 -11   3  194.08   14.90
   9  11  -3  213.68   15.60
   9  11   3  187.18   15.10
   9 -11  -3  218.98   15.10
  -9  11  -3  187.18    8.70
   9 -11  -3  192.38    8.00
  -9  11  -3  190.38   14.60
   9  11   3  191.88   12.80
  -9 -11   3  211.28   15.30
   9  13  -3  175.08   15.90
  -9  13   3  196.78   16.50
   9 -13   3  185.68   15.90
  -9 -13  -3  195.68   14.90
   9  13  -3  176.58   12.20
  -9 -13  -3  159.98   16.20
   9 -13  -3  184.98   15.40
   9  13   3  170.08   12.80
  -9  13  -3  181.58   15.90
  -9 -13   3  199.28   16.00
  -9  13  -3  170.98    8.30
   9  13   3  175.28   16.30
   9  -1   5  506.65   16.70
  -9   1   5  512.55   18.00
   9   1  -5  546.35   17.60
   9  -1   5  518.15   17.80
  -9  -1  -5  546.15   18.20
  -9  -1  -5  570.94   19.00
   9  -1   5  518.25   16.30
   9   1  -5  551.84   15.40
  -9  -1  -5  532.25   17.70
   9   1  -5  548.75   18.10
   9  -1   5  489.35   17.90
   9   1  -5  515.05   17.90
  -9  -1   5  526.55   18.10
  -9   1  -5  535.35   16.30
   9   1   5  510.25   18.00
   9  -1  -5  550.34   18.10
  -9  -1   5  493.75   17.60
   9  -1  -5  539.35   16.00
   9  -1  -5  547.15   16.10
  -9   1  -5  558.94   18.60
   9   1   5  513.45   18.30
  -9   1  -5  549.05   16.90
  -9  -1   5  509.85   15.40
   9  -1  -5  575.24   18.30
  -9  -1   5  508.15   17.60
  -9   1  -5  525.95   17.70
   9  -1  -5  533.25   17.70
   9  -1  -5  536.15   18.00
   9   1   5  531.95   17.90
   9  -3   5  356.76   13.90
   9   3  -5  357.76   13.70
   9   3  -5  352.56   12.40
  -9   3   5  358.86   13.90
  -9  -3  -5  352.26   15.00
   9   3  -5  363.46   12.90
  -9  -3  -5  359.26   13.70
  -9   3   5  358.16   13.70
  -9  -3  -5  363.66   14.20
  -9   3   5  345.77   13.40
  -9  -3  -5  368.26   11.20
   9   3  -5  317.87   15.30
  -9  -3  -5  378.16   11.40
   9  -3   5  351.36   13.00
  -9   3   5  365.76   13.80
  -9  -3   5  353.06   14.50
   9   3   5  369.86   14.50
  -9  -3   5  356.16   12.60
  -9   3  -5  338.37   13.50
   9  -3  -5  349.27   13.70
   9   3   5  359.46   15.00
  -9   3  -5  362.86   11.70
  -9  -3   5  334.77   13.40
  -9   3  -5  374.96   11.80
   9  -3  -5  346.87   13.60
   9  -3  -5  348.07   13.30
   9  -3  -5  363.16   13.60
  -9  -3   5  339.37   12.50
  -9   3  -5  368.76   14.60
   9   3   5  364.06   13.80
  -9   3  -5  376.96   13.00
  -9  -5  -5 1032.30   35.30
  -9  -5  -5 1029.20   31.50
  -9   5   5 1017.00   32.30
  -9  -5  -5 1096.29   31.50
  -9  -5  -5 1016.60   33.60
   9   5  -5 1022.40   29.50
   9  -5   5 1121.09   35.00
  -9   5   5 1013.50   32.40
   9   5  -5 1053.09   32.80
  -9   5   5 1030.80   33.50
   9   5  -5  993.10   33.00
   9  -5   5 1104.29   30.50
  -9   5   5 1047.80   34.00
   9   5  -5 1006.00   29.50
   9  -5   5 1073.39   29.50
   9  -5  -5  998.20   32.00
  -9  -5   5 1039.00   32.90
  -9   5  -5 1069.89   29.40
  -9   5  -5 1083.69   30.40
   9  -5  -5  955.90   33.30
  -9   5  -5 1076.79   34.90
  -9  -5   5 1012.40   34.50
   9   5   5 1088.99   32.40
   9  -5  -5  973.60   32.10
  -9  -5   5  958.90   32.20
   9  -5  -5  985.00   33.20
   9   5   5 1079.99   34.30
  -9  -7  -5 1881.41   57.89
   9   7  -5 1944.51   59.99
   9  -7   5 1842.72   53.39
  -9  -7  -5 1997.70   57.89
  -9   7   5 1996.00   60.99
  -9  -7  -5 1938.81   56.09
   9  -7   5 2008.80   61.59
  -9  -7  -5 1998.60   62.49
   9  -7   5 1933.11   52.89
   9   7  -5 1929.81   57.89
  -9   7   5 1924.21   57.49
  -9   7  -5 1988.40   53.59
  -9   7  -5 1956.60   52.89
   9  -7  -5 1926.01   56.59
  -9   7  -5 2000.00   61.39
   9  -7  -5 2014.70   59.99
   9  -7  -5 2034.70   57.49
  -9  -7   5 1922.01   61.19
   9   7   5 1927.21   59.69
   9   7   5 1976.60   56.49
  -9  -9  -5  900.71   36.20
  -9   9   5  823.72   34.30
  -9  -9  -5  861.51   28.10
  -9  -9  -5  869.51   31.80
   9  -9   5  842.42   26.30
  -9   9   5  876.51   30.60
   9   9  -5  915.01   34.70
   9   9  -5  856.41   30.80
   9  -9   5  921.11   35.50
  -9   9  -5  857.41   34.60
  -9  -9   5  908.11   35.30
   9   9   5  911.21   28.70
   9  -9  -5  831.82   28.50
   9  -9  -5  898.71   33.70
   9  -9  -5  884.61   29.20
   9   9   5  900.41   33.10
  -9 -11  -5   61.29    7.50
   9 -11   5   51.29    4.30
  -9 -11  -5   52.29    6.50
  -9  11   5   60.59    9.00
  -9 -11  -5   57.69   10.10
   9  11  -5   65.39    6.70
   9  11  -5   66.69   10.60
  -9  11   5   52.69    9.00
   9 -11   5   55.69    9.30
   9 -11  -5   56.49    5.20
   9 -11  -5   65.19    8.20
   9 -11  -5   62.39    5.30
  -9 -11   5   50.89    8.90
  -9  11  -5   56.49    4.20
   9  11   5   71.69    5.00
   9  11   5   54.79    8.40
  -9  11  -5   56.59    9.80
  -9 -13  -5  156.28   13.20
  -9  13   5  141.79   10.30
  -9 -13  -5  123.59   14.20
  -9  13   5  116.59   13.20
   9  13  -5  120.49   10.30
   9 -13   5  154.58   14.60
   9  13  -5  145.59   14.00
   9 -13  -5  131.19   12.90
  -9  13  -5  153.48   14.80
   9  13   5  147.49   12.10
  -9 -13   5  155.18   14.50
   9   1  -7  421.36   16.40
  -9   1   7  411.86   15.90
  -9  -1  -7  440.36   17.40
  -9  -1  -7  452.45   16.60
   9   1  -7  443.36   14.20
   9  -1   7  471.95   17.00
   9  -1   7  455.25   14.70
  -9  -1  -7  444.26   16.90
   9  -1   7  474.25   16.30
   9   1  -7  456.25   17.00
   9  -1   7  448.96   18.80
  -9  -1  -7  439.86   12.10
  -9   1   7  469.25   17.30
   9   1   7  450.25   17.20
  -9   1  -7  443.46   14.60
  -9  -1   7  438.96   16.70
   9   1   7  434.26   17.10
   9  -1  -7  469.25   17.20
  -9  -1   7  462.75   14.40
   9  -1  -7  452.95   17.20
   9  -1  -7  437.46   14.70
  -9   1  -7  439.76   15.80
  -9  -1   7  469.85   17.00
   9  -1  -7  446.76   16.90
  -9  -1   7  470.25   17.00
   9  -1  -7  444.26   16.20
   9   1   7  451.15   16.80
   9   1   7  454.55   12.10
   9  -1  -7  440.26   14.90
  -9   1  -7  451.15   16.70
  -9  -3  -7 2405.16   60.89
  -9  -3  -7 2436.26   68.29
  -9  -3  -7 2399.16   60.99
  -9  -3  -7 2272.97   65.99
   9  -3   7 2168.38   65.99
  -9   3   7 2350.26   65.39
   9   3  -7 2226.88   66.39
   9  -3   7 2191.68   64.79
   9   3  -7 2422.96   66.19
  -9   3   7 2345.87   66.59
   9   3  -7 2357.06   64.49
   9  -3   7 2216.38   65.29
   9   3  -7 2444.26   64.39
   9  -3  -7 2385.36   65.59
  -9   3  -7 2175.48   64.59
   9   3   7 2259.47   66.59
   9   3   7 2171.58   66.99
  -9  -3   7 2239.08   63.59
  -9  -3   7 2333.57   66.99
  -9  -3   7 2285.67   64.69
   9  -3  -7 2374.36   65.39
  -9   3  -7 2301.07   66.79
   9  -3  -7 2465.85   66.89
   9  -3  -7 2439.66   66.39
   9  -3  -7 2334.77   65.19
  -9   3  -7 2204.18   64.99
  -9  -3   7 2210.98   65.59
  -9   3  -7 2258.47   63.69
   9  -3  -7 2355.36   66.29
  -9   3  -7 2298.27   63.69
   9   3   7 2242.28   66.09
   9  -5   7 1521.95   46.90
   9  -5   7 1419.06   42.70
  -9   5   7 1449.35   45.40
   9   5  -7 1568.44   45.50
   9   5  -7 1533.75   42.70
  -9  -5  -7 1416.36   42.20
  -9  -5  -7 1485.35   48.10
   9   5  -7 1549.14   45.30
  -9   5   7 1534.05   45.70
  -9   5   7 1503.25   45.30
   9   5  -7 1488.05   42.40
  -9  -5  -7 1444.96   42.80
  -9  -5   7 1442.06   44.40
   9  -5  -7 1508.15   45.40
   9  -5  -7 1312.27   46.00
   9  -5  -7 1511.05   46.40
  -9   5  -7 1482.25   42.10
  -9   5  -7 1396.16   42.60
   9   5   7 1458.15   45.10
  -9   5  -7 1451.75   42.00
  -9  -5   7 1542.05   47.60
  -9   5  -7 1434.56   46.70
   9   5   7 1483.55   46.70
   9   7  -7  172.98    7.00
  -9  -7  -7  176.58    9.70
   9  -7   7  170.78    7.90
   9   7  -7  187.18   10.40
  -9   7   7  176.38   10.60
   9  -7   7  174.68    7.70
  -9   7   7  165.18   10.10
  -9  -7  -7  193.58   13.00
  -9   7   7  170.78   11.60
  -9  -7  -7  178.58    9.50
   9   7  -7  177.48    7.10
   9   7  -7  181.18   11.30
  -9   7  -7  183.48    8.00
  -9  -7   7  170.88   12.00
   9   7   7  172.28    9.90
   9   7   7  170.28   11.50
   9  -7  -7  178.98   11.10
  -9   7  -7  182.88    7.90
  -9   7  -7  180.98    8.00
  -9   7  -7  198.58   14.40
   9  -9   7   19.30    5.30
   9   9  -7   20.20    4.40
  -9   9   7   20.70    5.90
  -9  -9  -7   14.00    4.90
   9   9  -7   22.30    5.30
  -9   9   7   17.80    4.30
  -9  -9  -7   16.00    3.70
   9  -9   7   15.80    2.60
  -9  -9   7   14.60    4.90
   9   9   7   12.90    4.10
   9   9   7   20.10    3.90
   9  -9  -7   22.50    4.90
  -9   9  -7   20.00    3.00
  -9   9  -7   16.80    5.20
   9  -9  -7   16.20    3.80
  -9 -11  -7  504.05   22.70
   9  11  -7  456.25   20.70
  -9 -11  -7  516.05   27.60
  -9  11   7  457.05   21.30
   9 -11   7  485.95   25.90
   9  11  -7  472.65   24.70
  -9  11   7  438.96   24.80
  -9  11  -7  442.56   24.80
   9 -11  -7  449.66   19.60
  -9 -11   7  498.45   26.00
   9  11   7  480.75   19.00
   9 -11  -7  473.05   23.60
   9  11   7  486.15   23.60
  -9  11  -7  466.35   15.90
   9  13  -7   92.09   11.70
  -9  13   7   99.19   12.90
  -9  13   7  106.59    9.80
  -9 -13  -7  119.39   14.00
   9  13  -7  106.89    9.70
  -9 -13  -7   97.09   10.40
   9 -13   7  107.59   12.40
   9 -13  -7  112.89   11.90
   9 -13  -7  100.09    7.70
   9 -13  -7   84.89   13.00
  -9  13  -7   96.49   12.20
  -9 -13   7   99.29   12.40
   9   1  -9  328.27   14.60
   9   1  -9  319.07   11.80
   9  -1   9  334.27   14.50
   9  -1   9  333.87   14.60
  -9   1   9  285.97   12.00
  -9   1   9  273.47   13.90
  -9  -1  -9  338.37   15.00
  -9   1   9  272.97   12.80
   9   1  -9  296.27   13.50
   9  -1   9  342.77   14.00
  -9  -1  -9  352.26   10.30
   9  -1   9  319.87   11.80
  -9   1  -9  328.57   13.80
  -9  -1   9  311.17   13.90
  -9  -1   9  294.57   11.70
   9   1   9  340.87    9.70
   9  -1  -9  312.37   14.50
   9   1   9  337.67   14.90
   9   1   9  334.07   15.30
   9   1   9  334.97   14.40
  -9  -1   9  295.57   13.90
  -9   1  -9  348.17   13.90
  -9   1  -9  354.76   15.00
  -9   1  -9  334.37   11.90
   9  -1  -9  307.57   13.10
   9  -3   9   67.09    5.40
   9  -3   9   75.59    5.80
  -9   3   9   59.89    5.00
  -9  -3  -9   60.29    2.40
   9   3  -9   67.19    5.00
   9   3  -9   65.99    5.30
  -9  -3  -9   69.29    6.70
  -9   3   9   50.99    5.50
   9   3  -9   71.19    6.10
  -9  -3  -9   66.79    2.50
   9   3   9   68.39    6.20
   9  -3  -9   53.99    5.00
  -9  -3   9   66.69    6.20
   9   3   9   65.19    6.20
  -9   3  -9   62.89    5.40
  -9  -3   9   62.99    4.70
   9  -3  -9   68.29    6.30
  -9   3  -9   64.39    5.50
  -9   3  -9   63.79    5.10
   9  -3  -9   51.99    5.50
   9  -3  -9   56.19    5.10
  -9   3  -9   74.89    6.40
  -9   3  -9   61.69    5.00
  -9  -3   9   66.39    5.60
  -9  -5  -9  308.97   16.40
  -9   5   9  324.87   14.30
  -9   5   9  317.57   15.20
   9  -5   9  279.67   14.50
  -9  -5  -9  297.67   11.00
  -9  -5  -9  294.27   10.80
   9   5  -9  299.87   14.20
   9   5  -9  296.07   13.70
  -9   5   9  321.47   15.20
   9  -5   9  284.77   12.70
   9   5  -9  283.97   12.40
  -9   5  -9  279.57   15.00
  -9  -5   9  313.07   13.00
  -9   5  -9  296.27   12.30
  -9  -5   9  313.37   15.90
  -9   5  -9  277.87   12.60
   9  -5  -9  322.07   15.10
   9   5   9  307.67   15.60
   9   5   9  294.47   14.60
  -9   5  -9  270.87   13.00
  -9  -5   9  270.77   12.90
   9   7  -9   99.69    8.10
   9   7  -9   94.59    6.00
  -9  -7  -9  129.19    7.90
   9  -7   9  122.89   10.20
   9   7  -9   97.29    8.30
  -9   7   9  120.39    9.10
   9  -7   9  119.59    6.80
  -9  -7  -9  127.19    7.30
   9   7  -9  100.89    6.10
  -9  -7  -9  130.19   11.00
   9   7   9  127.29    9.10
  -9   7  -9  124.79    6.90
  -9   7  -9  110.19    6.80
   9  -7  -9  119.59   11.50
  -9   7  -9  119.29    9.80
   9  -7  -9  116.99    8.80
  -9   7  -9  120.89   10.10
   9   7   9  137.19   10.40
  -9  -7   9   93.19    9.20
  -9  -9  -9    5.20    3.30
  -9   9   9    3.00    2.30
   9  -9   9    2.60    3.10
   9   9  -9    3.50    2.70
   9   9  -9    0.30    2.10
  -9   9   9    4.20    2.90
  -9  -9  -9   -0.30    1.70
   9   9   9    0.30    1.90
  -9   9  -9    3.00    1.70
  -9  -9   9    2.10    2.50
  -9   9  -9    3.50    2.70
  -9   9  -9    2.30    2.70
   9  -9  -9    2.60    2.10
   9  -9  -9    1.30    2.90
  -9   9  -9    2.30    1.40
   9  -9  -9    0.60    2.10
   9   9   9    5.30    3.50
   9  11  -9  255.77   14.60
  -9 -11  -9  229.38   18.90
  -9  11   9  257.07   15.60
  -9 -11  -9  242.38   14.40
   9  11  -9  236.18   16.70
  -9 -11   9  256.17   18.40
   9 -11  -9  249.58   14.40
  -9  11  -9  245.18   10.20
   9  11   9  238.28   16.40
  -9  11  -9  211.78   18.70
   9  11   9  243.18   13.60
   9 -11  -9  240.88   15.90
   9 -11  -9  219.78   17.60
   9 -13   9   13.30    5.70
   9  13  -9   10.90    4.80
  -9 -13  -9    2.90    3.50
  -9 -13  -9   12.00    4.40
   9  13  -9    4.60    3.80
  -9  13   9   19.60    5.70
  -9 -13  -9    8.90    4.90
   9 -13  -9    4.10    3.80
   9  13   9   14.20    5.20
  -9  13  -9    6.30    4.60
   9 -13  -9   13.90    5.40
   9 -13  -9    7.20    3.50
  -9 -13   9   10.90    5.00
  -9   1  11   24.20    3.80
  -9   1  11   22.70    4.60
  -9  -1 -11   35.80    5.90
  -9  -1 -11   29.60    2.10
   9  -1  11   24.60    4.60
   9  -1  11   22.80    2.90
   9   1 -11   15.80    2.90
  -9   1  11   24.20    4.20
   9   1  11   32.30    2.10
   9  -1 -11   18.10    4.40
  -9  -1  11   18.10    4.30
   9   1  11   31.60    5.50
  -9  -1  11   17.10    3.60
  -9   1 -11   28.70    4.90
   9  -1 -11   23.30    3.50
  -9   1 -11   28.40    4.90
  -9   1 -11   21.10    2.80
   9  -1 -11   23.30    4.10
   9   1  11   29.50    4.90
   9   3 -11  141.49    8.00
  -9   3  11  149.09    8.60
   9  -3  11  137.89    9.10
  -9  -3 -11  121.89    9.80
   9  -3  11  132.69    8.30
  -9   3  11  151.78   10.30
   9   3 -11  152.58    9.90
   9   3  11  118.89    9.20
  -9   3 -11  127.79    8.40
   9  -3 -11  116.59    8.10
  -9  -3  11  143.79    7.90
  -9  -3  11  155.48   10.10
   9   3  11  123.59    9.30
  -9  -3  11  145.49    9.30
   9  -3 -11  129.29    8.30
  -9   3 -11  138.49    9.70
   9  -3 -11  134.09    9.80
  -9   3 -11  114.79    7.80
   9  -3 -11  138.89    8.60
  -9   5  11   68.89    6.20
  -9  -5 -11   73.59    8.20
   9   5 -11   54.19    5.80
   9  -5  11   68.29    6.10
  -9  -5 -11   66.29    3.70
  -9   5  11   84.59    7.90
   9  -5  11   64.39    6.70
   9   5 -11   57.99    6.20
  -9  -5 -11   63.89    3.70
   9  -5 -11   77.49    7.80
   9  -5 -11   72.59    7.20
   9   5  11   65.89    7.00
  -9  -5  11   74.59    7.70
  -9  -5  11   63.89    5.90
   9   5  11   76.59    7.70
  -9   5 -11   56.39    5.50
   9   7 -11   96.99    8.30
   9   7 -11  102.49    7.40
   9  -7  11  103.69    7.20
   9   7 -11  102.39    8.70
  -9   7  11  112.69    9.40
  -9   7  11  120.29    9.90
  -9  -7 -11   81.99    6.00
  -9  -7 -11   89.09    9.90
  -9  -7 -11   95.69    6.10
   9   7 -11  106.09    7.00
   9  -7  11   97.19    9.40
   9  -7 -11  104.39    8.40
  -9   7 -11  101.19    6.90
  -9  -7  11  124.39   10.90
   9  -7 -11   88.79    9.10
   9   7  11  118.09   10.40
   9   7  11  109.89    9.20
  -9   7 -11   88.49    9.20
   9   9 -11  123.59   10.80
   9   9 -11  130.39    6.40
   9   9 -11  130.59    6.60
  -9  -9 -11   93.89    7.50
   9  -9  11  108.49    6.70
   9  -9  11   99.79   10.90
  -9   9  11  125.79   10.80
  -9   9  11  134.29   10.80
   9   9 -11  132.59   10.00
  -9  -9 -11   99.59   11.50
   9   9  11  110.39    9.70
  -9   9 -11  106.29   11.00
  -9   9 -11  108.49    7.50
   9   9  11  106.99   10.60
   9  -9 -11  128.49   12.00
   9  -9 -11  120.19   10.10
  -9   9 -11  114.29    7.10
  -9  -9  11  143.09   12.70
  -9 -11 -11   66.09   11.10
  -9  11  11   64.29    9.80
  -9 -11 -11   54.59    6.60
   9  11 -11   37.60    6.70
   9 -11  11   55.59   10.40
   9  11 -11   47.80    8.80
  -9 -11  11   60.99   10.60
   9  11  11   50.19    8.80
  -9  11 -11   54.69   10.00
   9 -11 -11   54.69    7.50
   9 -11 -11   55.39   10.10
   9 -11 -11   47.70    8.00
  -9  11 -11   58.49    5.20
   9  11  11   58.09    7.30
  -9  -1 -13  225.38   13.20
  -9   1  13  193.78   10.30
   9  -1  13  196.08    9.30
   9  -1  13  193.08   12.30
  -9   1  13  200.08   11.00
  -9   1  13  191.58   12.80
   9   1 -13  202.28   10.00
   9   1 -13  213.78   13.00
  -9  -1 -13  190.58    7.40
   9  -1 -13  199.88   12.90
  -9   1 -13  196.08   12.20
   9  -1 -13  209.88   10.50
   9   1  13  194.58    7.30
  -9  -1  13  191.18    9.90
   9   1  13  188.28   12.20
  -9   1 -13  184.08    9.10
   9   1  13  181.78   12.40
  -9   1 -13  205.08   12.40
  -9  -1  13  193.58   12.30
  -9  -1  13  202.08   11.60
   9   3 -13   13.40    4.00
   9  -3  13   11.10    3.10
  -9   3  13   13.80    3.30
   9   3 -13   18.10    3.60
  -9   3  13   14.30    3.90
   9  -3  13   13.40    4.00
  -9  -3 -13    9.60    3.50
  -9  -3  13   14.70    4.00
   9  -3 -13    9.20    3.90
   9  -3 -13   10.00    3.00
  -9   3 -13   11.10    3.40
   9   3  13    2.70    2.70
   9   3  13    5.20    3.00
  -9  -3  13   11.80    2.90
  -9   5  13  309.37   17.90
   9   5 -13  325.47   16.00
  -9   5  13  345.57   15.90
  -9  -5 -13  352.46   19.80
   9  -5  13  355.56   17.70
   9  -5  13  368.26   17.30
   9   5 -13  364.36   18.20
   9  -5 -13  354.86   18.00
  -9  -5  13  342.07   18.40
   9   5  13  365.26   19.50
  -9   5 -13  372.96   18.90
  -9  -5  13  337.57   16.40
  -9   5 -13  375.26   16.60
   9   5  13  321.27   18.00
   9  -5 -13  348.27   19.20
  -9  -7 -13  161.28   13.80
   9  -7  13  150.48    9.70
   9   7 -13  158.98    9.80
  -9   7  13  154.58   12.30
  -9  -7 -13  141.99    7.00
   9  -7  13  150.88   12.20
   9   7 -13  147.79   11.00
   9   7 -13  179.68   12.00
   9  -7 -13  158.18   10.50
   9   7  13  153.78   12.00
   9   7  13  135.09   12.00
   9  -7 -13  153.38   12.30
  -9  -7  13  168.18   13.30
  -9   7 -13  150.88    9.50
   9  -7 -13  146.89   12.50
  -9   7 -13  159.28   12.60
  -9  -9 -13   78.69    6.00
   9  -9  13  100.29   11.00
   9   9 -13   82.99    8.90
   9   9 -13   72.39    5.80
  -9  -9 -13   93.39   11.30
   9   9 -13   88.49    8.70
   9  -9  13   83.59    6.50
  -9   9  13   84.29    9.30
   9  -9 -13   69.29    8.00
   9   9  13   98.69   10.00
   9  -9 -13   84.49   10.00
  -9   9 -13   89.09    7.10
  -9  -9  13   82.09   10.60
   9   9  13   75.39    9.90
  -9   9 -13   86.49   10.20
   9  -9 -13   82.29    9.70
   9 -11  13  124.39   13.50
  -9 -11 -13  103.39   10.20
   9  11 -13  102.49    9.90
  -9 -11 -13  110.69   13.00
   9  11 -13   88.79   14.00
   9 -11 -13   99.89   11.30
   9 -11 -13  117.99   13.10
   9  11  13  110.49   10.70
   9 -11 -13   99.39   11.10
  -9  11 -13   98.69   11.70
   9 -11 -13  108.79   10.50
   9  11  13  104.09   11.90
  -9 -11  13   97.69   12.50
   9  -1  15  128.79    7.40
  -9  -1 -15  139.89   11.30
   9   1 -15  131.49    8.50
   9   1 -15  129.29   10.80
  -9  -1 -15  133.49   10.70
   9  -1  15  144.79   11.40
  -9   1  15  144.19    9.40
  -9  -1 -15  138.09    5.90
  -9   1  15  111.29   10.50
   9   1  15  136.29   11.40
  -9  -1  15  127.79    9.50
  -9   1 -15  153.68   11.20
   9  -1 -15  137.99   11.30
   9   1  15  133.89    5.70
  -9   1 -15  135.49    8.10
   9  -1 -15  131.19    8.70
  -9  -1  15  115.79   10.30
  -9   1 -15  148.89   11.10
  -9   3  15   13.10    4.20
   9  -3  15   19.80    4.00
  -9   3  15   17.80    3.60
  -9  -3 -15   19.60    5.20
   9   3 -15   18.20    3.90
   9   3 -15   19.30    4.90
   9  -3  15   16.50    4.50
   9   3  15   20.00    5.10
  -9  -3  15   13.80    4.00
   9  -3 -15   13.70    4.50
   9  -3 -15   16.00    3.80
   9   3  15   17.90    5.10
  -9   3 -15   24.20    5.50
  -9   3 -15   22.40    4.90
  -9  -3  15   15.00    4.30
   9   5 -15  235.88   13.30
   9  -5  15  223.78   13.90
  -9   5  15  232.58   12.50
  -9   5  15  230.48   15.70
   9   5 -15  230.48   15.00
  -9  -5 -15  238.28   16.60
   9  -5  15  236.18   14.20
   9  -5 -15  236.58   16.40
  -9  -5  15  241.48   15.60
  -9   5 -15  260.97   14.30
  -9   5 -15  245.08   15.50
   9   5  15  230.38   15.90
   9  -5 -15  238.28   14.70
   9   5  15  237.68   15.80
  -9  -5  15  233.88   14.10
   9  -7  15  141.79   12.30
   9   7 -15  117.09   10.60
   9   7 -15  116.79   10.00
  -9  -7 -15  115.69   12.30
   9   7 -15  123.39    9.50
  -9   7  15   97.49   10.80
   9  -7  15  135.19    9.70
   9  -7 -15  130.49   11.80
   9  -7 -15  121.59   12.20
  -9   7 -15  132.69    9.70
   9   7  15  124.99   12.10
  -9  -7  15  114.49   11.70
   9  -7 -15   96.29   12.50
  -9  -7  15  116.39    9.10
   9   7  15  136.49   11.90
  -9   7 -15  130.99   12.10
  -9  -9 -15   19.20    5.80
   9   9 -15   15.40    5.00
   9   9 -15   16.10    4.00
   9   9 -15   16.40    4.80
   9  -9  15   25.00    8.10
   9  -9  15   23.00    4.30
   9   9  15   21.60    6.40
  -9  -9  15   18.90    6.40
  -9   9 -15   23.10    4.50
   9   9  15   20.50    6.10
   9  -9 -15   18.00    6.60
   9  -9 -15   12.70    5.40
   9  -9 -15   19.70    4.90
  -9   9 -15   20.80    6.20
  -9   1  17  144.89    9.80
  -9  -1 -17  132.69    5.70
   9   1 -17  156.88   12.60
   9  -1  17  139.29    8.10
  -9   1  17  156.08   13.00
  -9  -1 -17  155.08   12.40
  -9  -1 -17  141.79   12.30
   9   1 -17  149.19    9.50
   9  -1  17  136.59   12.20
  -9   1 -17  158.78   12.10
  -9  -1  17  158.08   10.80
   9   1  17  150.88   12.90
   9  -1 -17  143.99    9.60
   9   1  17  138.09    5.30
  -9  -1  17  167.08   13.00
  -9   1 -17  130.69    8.00
  -9   1 -17  154.68   12.10
   9  -1 -17  148.99   12.60
  -9  -3 -17  244.98   16.60
   9  -3  17  271.07   16.70
   9  -3  17  256.37   13.60
  -9   3  17  232.18   16.50
  -9   3  17  273.07   13.70
  -9  -3 -17  278.07   18.10
   9   3 -17  274.27   17.20
   9   3 -17  257.87   13.70
  -9   3 -17  267.17   16.10
  -9  -3  17  280.87   16.80
   9   3  17  249.58   17.30
  -9  -3  17  277.47   16.00
  -9   3 -17  252.17   16.20
   9  -3 -17  261.77   17.70
   9   5 -17  140.99   10.40
   9  -5  17  124.69   10.40
  -9   5  17  189.38   21.00
  -9   5  17  150.98    9.60
   9  -5  17  116.69   10.50
  -9  -5 -17  161.98   14.10
   9   5 -17  146.09   12.40
   9   5  17  134.69   14.20
  -9  -5  17  132.99   11.20
  -9  -5  17  127.69   11.80
  -9   5 -17  130.79   11.80
   9   5  17  154.28   15.10
  -9   5 -17  141.39   11.00
   9  -5 -17  160.58   12.10
   9   7 -17   82.99    9.30
   9  -7  17   81.89    8.40
   9   7 -17   78.79    8.60
   9   7 -17   90.39    9.00
  -9  -7 -17   65.49   11.60
  -9   7  17   77.39    9.90
   9  -7  17   74.09    9.20
   9   7  17   77.79   10.10
   9  -7 -17   71.89    7.50
  -9  -7  17   89.29    8.70
  -9   7 -17   84.59    8.70
   9  -7 -17   78.29   12.50
   9   7  17   70.79   11.40
  -9   7 -17   93.59   10.70
  -9  -7  17  131.69   22.00
   9  -7 -17   86.89   10.20
  -9   9  17   31.90    8.00
   9   9 -17   35.00    5.90
   9   9 -17   23.20    6.40
  -9  -9 -17   37.20    9.80
   9   9 -17   30.90    6.40
   9  -9  17   38.60    7.90
   9  -9  17   45.00    6.80
   9  -9 -17   24.50    8.10
   9  -9 -17   32.90    6.10
  -9   9 -17   43.00    9.00
  -9  -9  17   39.90    9.90
   9  -9 -17   42.60    9.00
   9   9  17   33.60    7.90
  -9   9 -17   40.50    6.90
   9   9  17   38.30    8.80
  -9   1  19   46.50    8.70
  -9  -1 -19   69.49    8.70
  -9   1  19   64.09    6.90
  -9  -1 -19   88.79   18.90
   9   1 -19   67.49   10.70
   9   1 -19   58.49    9.60
   9  -1  19   75.69    5.70
   9  -1  19   83.89   10.00
  -9   1 -19   66.49   10.40
   9  -1 -19   78.49    9.80
   9   1  19   91.99   10.70
   9  -1 -19   72.19    7.20
  -9   1 -19   85.89    9.60
  -9  -1  19   81.19   13.40
  -9  -1  19   68.79    7.80
  -9   3  19   29.90    5.10
   9   3 -19   22.80    5.90
   9  -3  19   25.70    4.80
  -9  -3 -19   25.20    7.00
  -9  -3 -19   21.60    6.00
   9   3 -19   29.60    5.20
  -9   3  19   30.30    7.80
   9   3  19   23.40    6.20
  -9  -3  19   28.10    7.80
   9  -3 -19   26.60    7.20
  -9   3 -19   32.40    7.00
  -9   3 -19   19.40    5.50
  -9  -3  19   29.10    6.40
   9  -3 -19   29.40    5.60
  -9  -5 -19   35.20    8.80
   9   5 -19   26.00    5.60
   9   5 -19   28.30    6.80
  -9  -5 -19   31.20    9.50
   9  -5  19   48.60   11.10
  -9   5  19   31.60    5.30
   9  -5  19   39.10    7.00
  -9   5  19   36.40    8.20
  -9   5 -19   33.20    7.10
  -9  -5  19   30.70    6.80
  -9  -5  19   22.70    5.60
   9   5  19   39.00    9.00
   9  -5 -19   25.70    6.30
  -9   5 -19   34.30    7.80
   9  -5 -19   34.90    8.20
   9   7 -19   30.80    5.80
   9  -7  19   31.20    6.30
  -9  -7 -19   32.10    8.20
  -9   7  19   40.90    9.00
   9   7 -19   33.90    7.60
   9  -7  19   24.00    8.10
   9   7 -19   27.30    6.30
  -9   7 -19   36.70    7.90
   9  -7 -19   39.30    8.20
  -9   7 -19   38.40    7.20
   9  -7 -19   48.50    9.80
   9   7  19   31.30    7.50
  -9  -7  19   28.20    7.50
   9   7  19   33.70    7.50
   9   1 -21    7.50    5.20
  -9   1  21    0.40    3.10
   9  -1  21    4.70    3.90
  -9   1  21    8.00    4.40
   9   1 -21    4.70    3.20
  -9  -1 -21    4.50    4.70
  -9   1 -21   -0.70    3.80
  -9  -1  21    2.40    3.00
   9  -1 -21    2.50    3.70
   9  -1 -21    4.30    3.20
  -9   1 -21    5.50    4.50
  -9  -1  21    1.70    3.10
   9   1  21    2.80    3.70
  -9  -3 -21   64.69   10.60
  -9   3  21   76.59   10.40
   9  -3  21   73.79    7.70
  -9  -3 -21   68.59   12.20
   9   3 -21   61.09    7.70
  -9   3  21   63.69   11.30
   9  -3  21   70.19    9.60
   9   3 -21   60.19   10.60
  -9  -3  21   99.59   10.30
   9  -3 -21   70.89    8.60
  -9   3 -21   68.39   10.60
   9   3  21   83.29   10.90
   9  -3 -21   76.99   12.80
  -9   3 -21   49.90    9.20
  -9  -3  21   73.59   11.20
  10   0   0    1.40    0.60
  10   0   0    1.50    0.70
  10   0   0    1.60    0.70
  10   0   0    0.80    0.60
 -10   0   0    3.30    0.80
 -10   0   0    1.70    0.70
 -10   0   0    1.40    0.70
 -10   0   0    1.70    0.80
  10  -2   0  257.47    7.30
  10   2   0  244.88    8.90
  10  -2   0  242.58    9.10
  10   2   0  245.88    8.50
 -10  -2   0  249.08    9.10
  10   2   0  243.18    9.30
  10  -2   0  234.18    8.60
 -10   2   0  253.87    9.60
 -10  -2   0  234.48    9.20
  10  -2   0  243.18    9.40
  10  -2   0  241.18    7.20
 -10  -2   0  236.68    9.20
 -10  -2   0  246.98    9.30
 -10   2   0  252.47    9.30
 -10   2   0  235.48    8.50
 -10  -2   0  246.78    8.50
 -10  -4   0 1469.65   43.20
 -10  -4   0 1465.25   43.60
  10   4   0 1428.46   42.90
  10  -4   0 1459.95   39.90
  10  -4   0 1498.35   44.10
 -10   4   0 1458.45   41.00
  10   4   0 1519.15   44.20
  10  -4   0 1480.15   41.10
  10   4   0 1489.45   40.40
  10   4   0 1551.04   43.40
  10  -4   0 1423.56   43.60
 -10  -4   0 1483.75   40.50
 -10   4   0 1504.45   44.00
  10  -4   0 1476.75   44.20
 -10  -4   0 1509.45   43.40
 -10   4   0 1488.15   39.70
  10  -6   0  108.59    5.20
  10  -6   0  113.19    5.30
  10   6   0  103.29    7.90
  10   6   0  116.99    4.60
 -10  -6   0  114.29    7.70
 -10  -6   0  114.59    7.40
 -10   6   0  106.99    5.10
 -10   6   0  108.29    7.90
  10  -6   0  115.89    8.10
  10   6   0  115.89    7.40
 -10  -6   0  115.79    4.60
  10  -6   0  118.49    5.50
  10   6   0  104.59    7.30
  10  -8   0 2390.36   64.29
  10  -8   0 2370.56   66.09
  10  -8   0 2360.26   72.99
 -10  -8   0 2470.95   72.39
  10  -8   0 2351.06   64.49
 -10   8   0 2403.56   77.39
 -10   8   0 2395.56   65.89
  10   8   0 2401.46   70.49
  10   8   0 2393.86   73.49
  10 -10   0   29.00    4.90
 -10 -10   0   29.00    6.20
  10  10   0   46.80    8.10
 -10  10   0   22.70    5.50
  10  10   0   24.50    5.50
  10 -10   0   23.80    5.20
 -10  10   0   22.30    3.30
 -10  12   0  219.18   10.50
 -10 -12   0  242.48   16.60
  10  12   0  211.28   16.70
  10 -12   0  199.58   15.80
 -10  12   0  244.78   17.50
  10  12   0  230.28   14.00
 -10 -14   0   10.50    4.70
 -10  14   0    7.70    4.60
  10  14   0    8.80    5.20
  10 -14   0   10.40    5.30
  10  14   0   15.20    5.20
  10   0  -2 1909.21   49.20
 -10   0  -2 1967.00   52.09
  10   0  -2 1927.01   51.49
  10   0   2 1878.61   51.09
 -10   0  -2 1841.02   50.99
 -10   0   2 1809.72   51.29
 -10   0   2 1881.61   51.99
  10   0   2 1895.31   51.79
  10   0  -2 1868.31   51.79
 -10   0  -2 1981.60   50.49
 -10   0   2 1868.01   51.59
  10   0   2 1857.71   51.79
 -10   0  -2 1939.71   51.79
 -10   0   2 1889.91   49.20
 -10   2   2  110.89    5.00
 -10  -2  -2  105.49    5.50
  10  -2   2   88.39    3.20
 -10  -2  -2  108.29    5.90
  10   2  -2  116.29    5.60
  10  -2   2   85.29    4.70
  10  -2   2   85.79    5.10
  10   2  -2  114.79    4.90
  10  -2   2   91.59    5.10
 -10  -2  -2  104.09    5.10
 -10  -2  -2  107.39    4.50
 -10   2   2  109.09    5.70
  10   2  -2  106.99    4.70
  10   2  -2  109.69    5.70
 -10   2  -2   94.29    5.30
 -10   2  -2   94.59    4.70
 -10  -2   2   99.99    4.60
 -10  -2   2   96.59    4.50
 -10  -2   2  110.99    5.80
  10   2   2  103.89    5.80
  10  -2  -2  116.79    5.40
  10   2   2   96.69    5.50
  10  -2  -2  118.49    5.40
  10  -2  -2  119.69    4.90
  10   2   2   92.89    4.90
  10  -2  -2  115.49    4.90
 -10   2  -2   97.79    3.30
 -10  -2   2  100.29    5.20
  10  -2  -2  119.89    5.20
  10  -2  -2  109.49    5.60
  10   2   2   96.99    4.30
 -10   4   2  870.21   25.30
 -10  -4  -2  848.02   29.90
  10  -4   2  880.51   28.10
  10   4  -2  885.81   27.40
  10   4  -2  824.82   27.50
  10  -4   2  875.91   22.80
 -10  -4  -2  853.21   25.40
 -10   4   2  864.11   27.90
 -10  -4  -2  795.72   27.00
  10  -4   2  861.21   25.10
 -10  -4  -2  877.31   27.90
  10   4  -2  872.41   24.20
 -10   4   2  859.91   27.50
 -10  -4  -2  866.41   28.40
  10   4  -2  867.61   27.10
  10  -4   2  881.81   30.00
  10   4   2  825.12   26.10
  10  -4  -2  878.11   25.90
 -10   4  -2  875.61   28.10
  10  -4  -2  863.31   27.80
  10  -4  -2  839.82   25.70
 -10  -4   2  871.41   28.00
  10  -4  -2  823.92   27.30
 -10  -4   2  876.81   27.10
 -10  -4   2  855.21   24.10
  10   4   2  897.11   27.80
  10   4   2  865.11   25.40
 -10   4  -2  861.71   22.70
  10  -4  -2  853.21   25.80
 -10  -4   2  813.82   26.70
 -10   4  -2  872.51   24.90
  10   6  -2  734.93   26.70
 -10  -6  -2  740.63   22.50
  10   6  -2  765.42   19.90
  10   6  -2  753.72   25.40
 -10   6   2  724.73   23.10
  10  -6   2  707.63   21.10
  10  -6   2  734.33   27.00
 -10  -6  -2  750.42   27.30
 -10   6   2  781.82   27.20
  10  -6   2  725.63   21.70
 -10  -6  -2  725.63   25.90
  10   6  -2  758.02   19.90
 -10   6  -2  746.63   27.10
  10   6   2  688.73   25.00
  10  -6  -2  759.62   23.20
  10  -6  -2  736.73   23.30
 -10  -6   2  770.82   27.10
 -10   6  -2  744.03   21.20
  10   6   2  763.32   26.20
  10  -6  -2  748.93   26.70
 -10  -6   2  726.73   25.10
  10   6   2  740.43   22.50
  10  -6  -2  754.12   23.20
 -10   6  -2  752.12   21.60
  10   6   2  738.03   27.50
  10  -8   2  346.17   12.40
 -10   8   2  348.87   14.10
 -10  -8  -2  382.56   12.70
 -10  -8  -2  401.06   17.70
  10  -8   2  372.26   20.20
  10   8  -2  379.56   16.50
  10  -8   2  346.17   10.90
  10   8  -2  379.06   18.40
 -10   8   2  357.36   18.50
 -10   8  -2  376.36   12.70
  10   8   2  373.66   12.50
  10   8   2  367.46   16.90
  10  -8  -2  372.56   18.10
 -10   8  -2  363.56   19.70
 -10  -8   2  372.36   18.30
  10  -8  -2  388.06   13.70
  10  -8  -2  378.06   13.40
  10  10  -2  129.79   11.40
  10 -10   2  102.99    6.00
  10 -10   2  110.59   10.60
  10  10  -2  124.89    9.20
 -10 -10  -2  121.09   10.00
 -10  10   2  117.09    7.40
 -10  10   2  119.59   11.00
  10  10   2  108.19    9.10
 -10 -10   2  117.59   10.50
  10 -10  -2  114.19    6.80
  10 -10  -2  122.89   10.70
  10  10   2  109.19   10.90
 -10  10  -2  121.99    6.30
 -10  10  -2  120.89   10.90
  10 -10  -2  116.09    5.60
  10  12  -2  103.59   11.60
  10  12  -2   79.99    8.10
 -10 -12  -2  100.19   10.50
  10 -12   2   81.29   10.20
 -10  12   2   98.09   11.30
 -10  12   2   83.09    7.00
 -10 -12   2   81.09    9.90
  10  12   2   88.49    8.80
 -10  12  -2  111.19   11.60
  10  12   2   90.49   13.10
 -10  12  -2   86.89    5.60
  10 -12  -2   89.99   10.30
  10  14  -2  151.58   11.90
 -10  14   2  147.99   15.20
  10  14  -2  140.09   14.90
 -10 -14  -2  153.38   15.70
 -10 -14  -2  167.38   14.80
 -10  14   2  157.28    9.90
  10 -14   2  187.18   16.30
 -10 -14   2  156.28   14.80
 -10  14  -2  162.18   15.30
  10 -14  -2  146.29   14.50
  10  14   2  149.69   12.20
  10  14   2  184.38   17.40
  10   0   4    7.10    1.80
  10   0   4    6.90    1.50
 -10   0  -4    1.10    0.80
  10   0   4    1.30    0.50
 -10   0   4    1.60    1.20
 -10   0   4    0.70    0.90
  10   0  -4    2.00    1.00
 -10   0  -4    1.00    0.90
  10   0  -4    3.40    0.50
  10   0  -4    3.80    1.40
  10   0   4    2.90    0.70
 -10  -2  -4 1757.32   51.79
  10   2  -4 1765.02   51.99
 -10   2   4 1860.01   50.49
  10   2  -4 1816.52   50.59
  10  -2   4 1964.30   49.60
  10   2  -4 1824.82   51.79
 -10  -2  -4 1848.22   52.99
 -10   2   4 1869.41   51.89
  10  -2   4 1862.91   51.29
  10  -2   4 1864.91   51.29
  10   2  -4 1845.22   49.80
 -10  -2  -4 1778.42   48.30
  10   2  -4 1813.92   50.79
  10  -2   4 1900.31   52.19
 -10  -2  -4 1808.42   51.59
 -10   2   4 1823.92   51.79
  10   2   4 1865.91   52.69
 -10  -2   4 1902.31   52.49
 -10   2  -4 1835.72   52.29
  10  -2  -4 1868.61   53.09
 -10   2  -4 1779.12   49.30
 -10   2  -4 1801.92   50.99
  10  -2  -4 1788.12   51.19
  10   2   4 1861.81   48.40
  10   2   4 1856.31   51.79
 -10  -2   4 1833.62   51.69
 -10   2  -4 1790.32   50.99
  10  -2  -4 1833.52   51.79
  10  -2  -4 1783.32   50.29
  10  -2  -4 1815.02   51.69
  10   2   4 1868.81   52.19
 -10  -2   4 1888.21   49.70
  10  -4   4 1091.99   32.60
 -10  -4  -4 1103.59   36.30
  10   4  -4 1161.38   31.90
 -10  -4  -4 1106.89   33.60
  10   4  -4 1143.19   34.30
 -10   4   4 1167.28   34.20
 -10  -4  -4 1169.68   36.80
 -10   4   4 1130.79   33.70
  10  -4   4 1124.79   35.40
 -10   4   4 1136.29   34.80
  10   4  -4 1103.69   35.50
  10   4  -4 1165.98   32.00
 -10  -4  -4 1131.99   32.80
  10   4  -4 1166.48   34.50
 -10  -4  -4 1087.49   34.90
 -10   4   4 1126.39   35.10
  10  -4   4 1073.99   35.20
 -10   4  -4 1078.89   35.00
 -10  -4   4 1144.19   35.80
  10   4   4 1100.69   32.70
 -10   4  -4 1142.59   30.80
  10   4   4 1133.99   35.40
 -10  -4   4 1154.98   34.10
  10   4   4 1136.19   33.80
  10  -4  -4 1123.79   34.00
 -10  -4   4 1100.39   34.30
 -10   4  -4 1146.99   35.80
  10  -4  -4 1135.49   33.50
 -10   4  -4 1132.09   30.80
  10  -4  -4 1142.19   36.90
 -10   4  -4 1145.89   32.60
  10  -4  -4 1158.58   34.90
  10   6  -4  148.09    5.30
  10  -6   4  161.78    6.50
  10   6  -4  141.39    9.10
 -10   6   4  152.78    8.00
  10  -6   4  158.68    5.90
 -10  -6  -4  151.48   10.40
  10  -6   4  154.98   10.00
  10   6  -4  156.78    8.80
 -10  -6  -4  141.49    7.50
  10   6  -4  141.49    5.30
 -10  -6  -4  149.79    8.30
 -10   6   4  153.58    9.60
  10  -6  -4  137.79    8.60
 -10   6  -4  151.28    9.90
 -10   6  -4  150.88    6.30
 -10   6  -4  149.88    5.80
  10   6   4  141.39    8.20
 -10  -6   4  150.48    8.60
  10  -6  -4  146.39    8.60
  10  -6  -4  145.59    9.30
  10  -6  -4  141.59    8.00
 -10  -6   4  160.18   10.20
  10   6   4  158.88    9.50
  10   6   4  145.99    7.60
  10  -8   4  724.03   23.00
  10   8  -4  840.52   31.00
 -10   8   4  829.02   27.10
 -10  -8  -4  808.92   28.80
  10  -8   4  739.23   21.60
 -10  -8  -4  758.22   25.00
 -10  -8  -4  826.12   32.30
  10  -8   4  756.42   30.70
  10   8  -4  809.52   28.20
  10  -8  -4  804.52   25.90
 -10  -8   4  839.82   31.60
  10  -8  -4  838.52   30.60
  10   8   4  762.32   31.50
  10  -8  -4  801.92   26.10
 -10   8  -4  780.42   23.30
  10  -8  -4  772.22   28.60
  10   8   4  772.12   25.20
 -10   8  -4  773.82   30.90
  10   8   4  792.32   29.50
 -10 -10  -4  150.58    7.50
  10 -10   4  154.18    7.00
  10 -10   4  159.78   12.90
 -10  10   4  161.68    9.70
  10  10  -4  145.89   12.30
  10  10  -4  164.78   10.70
 -10 -10  -4  152.38   11.20
 -10  10   4  169.48   13.20
 -10 -10  -4  168.78   13.70
 -10  10  -4  162.48   12.90
 -10 -10   4  142.39   12.10
  10  10   4  167.48   11.70
  10  10   4  170.88   13.70
  10 -10  -4  153.58   11.90
  10  10   4  159.88    7.70
  10 -10  -4  143.99    7.90
  10 -10  -4  156.38    8.40
 -10 -12  -4  193.48   14.20
  10  12  -4  193.78   15.80
  10  12  -4  209.78   13.00
 -10  12   4  190.28   16.00
 -10  12   4  185.18   11.60
 -10  12  -4  223.48   23.70
  10 -12  -4  186.28    8.40
  10 -12  -4  177.88   14.40
  10  12   4  203.28   13.80
 -10 -12   4  182.28   15.60
 -10 -14  -4   64.69   10.30
 -10  14   4   56.99    6.80
 -10  14   4   49.30   10.50
  10  14  -4   49.30   10.10
  10 -14   4   57.29   10.20
  10  14  -4   68.49    8.60
 -10 -14  -4   64.09   12.10
  10  14   4   46.90    9.20
 -10 -14   4   49.50    9.90
  10 -14  -4   62.59   11.20
 -10  14  -4   71.89   11.80
 -10   0   6 1163.88   35.80
  10   0   6 1159.58   36.10
  10   0  -6 1216.18   35.90
 -10   0   6 1236.78   36.00
  10   0  -6 1236.68   32.70
  10   0   6 1180.48   36.40
 -10   0  -6 1127.49   35.70
  10   0   6 1144.39   35.10
 -10   0   6 1236.18   32.80
  10   0   6 1158.08   32.30
 -10   0  -6 1188.48   36.50
 -10   0  -6 1198.08   35.20
  10   0  -6 1194.28   35.70
 -10   0   6 1244.28   36.30
  10   0  -6 1234.58   36.30
  10   2  -6  808.62   25.40
  10   2  -6  806.72   22.90
 -10  -2  -6  784.82   26.50
 -10  -2  -6  736.03   26.90
 -10  -2  -6  769.82   25.30
  10  -2   6  764.92   24.80
  10   2  -6  790.22   27.30
 -10   2   6  757.02   24.80
 -10   2   6  730.53   25.30
  10   2  -6  797.32   24.50
 -10   2  -6  810.12   23.60
  10  -2  -6  811.32   25.70
 -10   2  -6  784.22   25.90
  10  -2  -6  784.42   23.70
 -10  -2   6  803.92   24.80
 -10   2  -6  791.22   23.60
  10   2   6  757.72   25.40
 -10   2  -6  775.92   24.70
 -10   2  -6  750.72   23.80
  10  -2  -6  740.93   25.10
  10   2   6  714.73   25.70
  10  -2  -6  761.42   24.80
 -10  -2   6  781.52   25.80
  10   2   6  708.83   25.00
  10  -2  -6  782.12   23.70
 -10  -2   6  766.32   22.60
 -10   4   6 2056.99   60.89
  10  -4   6 2181.38   69.09
  10   4  -6 2126.19   59.99
 -10  -4  -6 2071.09   60.59
 -10   4   6 2116.49   60.99
  10   4  -6 2126.19   58.79
  10  -4   6 2060.79   59.09
 -10  -4  -6 2199.38   57.49
  10   4  -6 2130.99   58.59
 -10  -4  -6 2197.88   57.69
 -10  -4  -6 2246.08   63.79
 -10   4   6 2091.39   60.89
 -10   4   6 2096.29   60.79
  10   4  -6 2113.69   60.69
  10  -4   6 2115.59   61.69
  10  -4  -6 2157.48   60.99
  10  -4  -6 2098.19   60.89
 -10   4  -6 2061.89   61.19
  10   4   6 2167.58   62.19
 -10   4  -6 2145.19   57.69
  10  -4  -6 2148.49   60.59
 -10   4  -6 2137.39   57.59
 -10  -4   6 1971.10   60.29
 -10   4  -6 2090.49   61.99
 -10  -4   6 2103.19   62.49
 -10  -4   6 2047.10   59.49
  10   4   6 2075.49   60.69
  10  -4  -6 2094.89   60.79
 -10   4  -6 2116.39   59.09
 -10  -6  -6 1139.19   35.30
  10  -6   6 1123.69   38.70
 -10  -6  -6 1212.98   40.30
 -10  -6  -6 1117.39   35.70
 -10  -6  -6 1175.28   35.10
  10   6  -6 1116.59   32.50
 -10   6   6 1143.89   36.50
 -10   6   6 1163.98   36.50
  10   6  -6 1137.79   36.50
  10   6  -6 1133.19   37.30
 -10   6   6 1166.68   38.40
  10   6  -6 1139.29   32.40
  10  -6   6 1092.99   33.20
  10  -6  -6 1140.79   37.50
  10  -6  -6 1161.78   38.10
  10   6   6 1121.99   35.80
 -10   6  -6 1138.29   32.50
  10   6   6 1174.38   38.40
 -10   6  -6 1119.19   32.50
 -10   6  -6 1106.49   33.20
 -10  -6   6 1145.69   39.10
 -10   6  -6 1124.19   38.70
  10  -8   6   47.60    3.10
 -10   8   6   53.79    5.60
  10   8  -6   58.09    6.00
  10  -8   6   50.79    6.70
 -10   8   6   51.59    6.70
  10   8  -6   54.79    6.60
 -10  -8  -6   51.39    5.40
 -10  -8  -6   53.89    8.50
  10  -8   6   42.60    3.50
  10   8   6   44.60    6.00
  10  -8  -6   57.49    5.80
  10   8   6   47.00    5.00
 -10   8  -6   67.59    7.60
  10  -8  -6   58.29    6.60
 -10   8  -6   50.49    3.10
 -10  -8   6   45.50    7.80
 -10   8  -6   58.09    3.80
 -10  10   6   79.29    9.60
  10  10  -6   94.89    9.30
  10  10  -6   75.79    8.90
 -10 -10  -6   81.69    9.70
  10 -10   6   84.19    5.00
 -10 -10  -6   81.79    7.90
 -10  10   6   85.89    7.70
  10 -10   6  100.59   10.30
 -10  10  -6   89.79    9.80
  10 -10  -6   84.79    8.90
  10  10   6   95.19    6.80
 -10 -10   6   84.39    9.70
  10  10   6   99.09    9.30
  10 -10  -6   81.09    6.90
  10 -12   6  210.68   16.70
  10  12  -6  215.28   16.20
 -10 -12  -6  180.88    9.50
 -10 -12  -6  211.08   14.40
 -10 -12  -6  228.28   18.10
 -10  12   6  193.78   12.40
  10  12  -6  200.18   12.80
 -10  12  -6  197.88    7.40
  10 -12  -6  200.78   15.20
 -10 -12   6  208.28   16.60
  10 -12  -6  173.08   10.10
  10  12   6  181.48   13.80
 -10  12  -6  187.58   16.00
  10   0   8    1.60    0.80
  10   0   8    1.50    1.20
 -10   0  -8    4.00    1.70
  10   0   8    0.90    1.40
 -10   0  -8    2.90    1.60
  10   0  -8    1.20    0.80
 -10   0  -8    3.60    1.00
  10   0  -8    1.90    1.50
  10   0  -8    2.80    1.50
  10   0  -8    1.30    1.50
  10   0  -8    3.20    1.70
 -10   0   8    0.20    0.90
  10   0   8    1.20    1.40
 -10   0   8    0.70    1.30
 -10   0  -8    0.90    1.30
  10  -2   8  327.97   14.40
  10  -2   8  339.07   12.90
  10   2  -8  309.47   14.00
  10  -2   8  317.87   13.90
  10   2  -8  338.17   14.50
 -10   2   8  374.26   15.30
  10   2  -8  335.17   12.00
 -10  -2  -8  353.46   15.70
  10   2  -8  330.67   13.60
 -10   2   8  349.77   13.80
 -10  -2   8  332.57   11.90
  10   2   8  316.17   14.70
 -10   2  -8  338.57   13.30
 -10   2  -8  314.87   12.90
  10  -2  -8  321.77   13.60
  10  -2  -8  344.07   13.00
 -10  -2   8  324.77   13.90
  10   2   8  336.47   14.60
 -10   2  -8  325.27   12.70
 -10  -2   8  344.07   14.60
 -10   2  -8  336.87   14.00
  10  -2  -8  330.47   12.90
  10  -2  -8  350.46   15.00
  10   2   8  321.47   14.50
 -10   2  -8  335.87   14.80
  10   4  -8 1129.59   35.90
  10  -4   8 1147.49   36.30
 -10  -4  -8 1111.09   30.80
  10  -4   8 1123.59   34.60
 -10   4   8 1056.99   36.10
  10   4  -8 1124.19   34.20
 -10   4   8 1094.89   36.10
  10   4  -8 1146.09   34.60
 -10  -4  -8 1088.29   30.80
 -10   4   8 1047.20   34.90
 -10  -4  -8 1122.49   38.10
  10   4   8 1112.29   37.00
 -10  -4   8 1111.39   37.00
  10  -4  -8 1050.99   35.10
 -10  -4   8 1082.09   33.80
  10  -4  -8 1134.49   36.70
 -10   4  -8 1161.58   33.40
 -10  -4   8 1134.79   34.30
 -10   4  -8 1106.39   34.40
  10  -4  -8 1074.59   35.50
  10  -4  -8 1040.50   35.00
  10   4   8 1112.19   36.20
 -10   4  -8 1074.79   35.40
 -10   4  -8 1149.29   37.30
 -10   4  -8 1128.89   33.30
 -10  -6  -8  915.01   29.10
  10  -6   8  952.60   29.50
  10   6  -8  945.01   28.80
 -10   6   8  936.01   32.30
 -10  -6  -8  937.51   29.00
  10   6  -8  954.20   32.10
  10   6  -8  936.31   28.70
  10   6  -8  951.30   32.40
 -10  -6  -8  910.01   35.10
 -10   6   8  928.11   32.50
  10  -6   8  923.01   33.90
 -10   6   8  962.40   32.60
 -10   6  -8  877.91   28.30
 -10   6  -8  943.61   28.50
  10  -6  -8  924.31   33.50
 -10  -6   8  978.00   35.30
 -10   6  -8  922.91   34.10
  10   6   8  921.81   31.90
  10   6   8  960.90   33.90
 -10   8   8  133.39    9.30
 -10  -8  -8  130.29    8.20
  10  -8   8  117.59   10.50
 -10  -8  -8  114.99   10.80
  10   8  -8  110.59    5.20
 -10   8   8  113.49   10.10
  10   8  -8  132.39   11.60
  10   8  -8  114.69    5.20
 -10   8   8  118.89    9.30
  10   8  -8  109.69    8.50
  10  -8   8  117.59    6.10
 -10   8  -8  128.29    6.50
 -10   8  -8  115.89    6.10
 -10   8  -8  118.39   10.50
  10  -8  -8  125.09   10.60
  10  -8  -8  118.39    9.00
  10  -8  -8  116.79   10.70
 -10  -8   8  118.59   10.40
  10   8   8  125.79   10.20
  10   8   8  116.29    8.50
 -10   8  -8  111.89    6.20
 -10  10   8   30.80    7.40
  10  10  -8   39.10    6.30
  10 -10   8   34.00    6.90
 -10 -10  -8   31.50    7.50
 -10  10   8   21.90    4.80
  10  10  -8   32.90    7.20
 -10  10  -8   30.20    3.30
 -10  10  -8   30.10    6.80
  10  10   8   34.30    6.80
 -10 -10   8   40.90    8.00
  10 -10  -8   31.70    6.30
  10  10   8   33.40    5.40
  10 -10  -8   29.50    6.10
  10 -10  -8   38.00    7.90
 -10  10  -8   35.40    3.70
 -10 -12  -8  298.57   17.30
  10 -12   8  314.07   21.10
  10  12  -8  283.67   16.10
 -10 -12  -8  288.47   21.20
 -10  12   8  306.57   17.20
 -10  12  -8  316.37   20.90
  10 -12  -8  312.57   21.50
 -10 -12   8  277.67   20.20
  10 -12  -8  306.47   19.10
  10  12   8  294.27   14.30
  10 -12  -8  320.27   16.30
  10  12   8  286.27   18.60
  10   0  10 1299.87   40.90
  10   0  10 1270.67   39.80
 -10   0 -10 1256.17   35.10
 -10   0  10 1210.68   40.20
  10   0 -10 1301.77   41.00
 -10   0  10 1202.38   36.50
 -10   0 -10 1269.27   40.70
 -10   0  10 1218.08   39.00
  10   0 -10 1176.98   38.60
  10   0 -10 1222.78   36.50
  10   0  10 1289.17   35.10
 -10   2  10 1362.26   43.50
  10   2 -10 1357.76   43.00
 -10   2  10 1304.07   40.80
  10  -2  10 1358.66   39.80
  10  -2  10 1381.66   42.70
  10   2 -10 1294.57   39.00
 -10  -2 -10 1349.96   43.90
  10   2  10 1353.76   43.10
 -10  -2  10 1279.17   41.90
  10  -2 -10 1240.38   40.70
 -10   2 -10 1409.96   41.70
 -10   2 -10 1304.87   39.70
  10  -2 -10 1331.87   40.20
  10   2  10 1331.87   43.20
 -10   2 -10 1336.77   43.00
  10  -2 -10 1359.26   43.50
 -10  -2  10 1331.27   42.50
  10  -2 -10 1271.87   40.10
 -10  -2  10 1288.27   39.00
 -10   2 -10 1437.06   43.60
  10   4 -10  211.48   10.80
 -10  -4 -10  222.68    7.10
 -10  -4 -10  226.58   13.80
 -10   4  10  235.78   11.70
  10   4 -10  216.68   12.10
 -10   4  10  242.38   13.20
  10  -4  10  250.57   12.00
 -10  -4 -10  221.38    7.10
  10  -4  10  254.17   12.50
  10  -4 -10  215.38   11.70
 -10  -4  10  240.98   13.30
 -10   4 -10  229.98   10.90
  10  -4 -10  227.18   13.10
  10   4  10  246.08   13.60
 -10  -4  10  242.28   11.80
 -10   4 -10  212.38   10.60
 -10  -4  10  241.88   11.00
 -10   4 -10  234.78   13.20
  10   4  10  252.47   13.30
  10  -4 -10  206.48   11.50
  10  -4 -10  204.28   11.30
 -10   6  10  846.12   31.80
  10   6 -10  824.22   28.10
  10   6 -10  874.31   30.70
  10  -6  10  882.71   32.50
 -10  -6 -10  864.81   26.40
 -10   6  10  840.92   30.20
 -10  -6 -10  896.81   34.40
  10   6 -10  862.51   30.90
  10   6 -10  863.81   28.40
  10  -6  10  816.32   28.30
 -10   6 -10  836.32   27.70
 -10   6 -10  876.01   27.90
 -10  -6  10  844.12   33.10
  10   6  10  867.11   31.90
 -10   6 -10  846.22   32.80
  10   6  10  840.52   32.70
  10  -6 -10  860.41   32.20
  10  -6 -10  881.61   32.30
 -10  -8 -10  217.58   15.50
  10  -8  10  213.48    9.90
 -10  -8 -10  200.08   10.40
 -10  -8 -10  200.78   10.80
  10  -8  10  227.08   15.00
  10   8 -10  183.28    8.80
 -10   8  10  201.28   12.90
  10   8 -10  195.58    9.10
  10   8 -10  209.28   12.50
  10   8 -10  215.08   13.50
 -10   8  10  222.98   13.70
 -10   8 -10  197.18    9.70
  10  -8 -10  215.48   14.50
  10   8  10  229.38   13.30
  10  -8 -10  200.78   12.80
 -10   8 -10  199.48    9.70
 -10   8 -10  184.38    9.50
 -10  -8  10  197.78   14.70
  10   8  10  210.28   14.40
 -10   8 -10  230.28   15.20
  10 -10  10  574.64   28.70
  10  10 -10  557.64   26.60
  10  10 -10  584.14   24.40
 -10  10  10  549.65   25.40
 -10 -10 -10  563.64   22.80
 -10 -10 -10  610.84   30.30
  10 -10 -10  572.04   25.80
  10 -10 -10  561.74   25.30
 -10  10 -10  560.14   28.10
  10  10  10  558.94   24.00
  10  10  10  553.04   26.90
  10 -10 -10  582.74   29.00
 -10  10 -10  563.44   19.30
 -10 -10  10  530.55   28.40
  10  12 -10   68.59    8.00
  10  12 -10   75.19    9.70
  10 -12  10   72.39   12.10
 -10 -12 -10   77.29   13.10
 -10 -12 -10   61.69    7.70
 -10  12  10   75.49    9.10
  10 -12 -10   66.99    8.80
 -10 -12  10   82.59   10.60
  10 -12 -10   81.39   13.20
  10  12  10   77.59    7.70
 -10  12 -10   56.19   10.40
  10  12  10   74.49    9.50
  10 -12 -10   60.29    7.70
  10   0  12    1.60    1.60
  10   0  12    1.40    1.00
  10   0  12    5.00    2.60
 -10   0 -12   -0.40    1.70
 -10   0 -12    1.10    1.60
 -10   0  12    2.20    1.30
 -10   0  12    1.90    1.90
 -10   0 -12    1.00    1.00
 -10   0  12   -0.30    1.70
  10   0 -12    2.00    1.30
 -10   2  12 1123.09   36.30
 -10  -2 -12 1130.69   39.60
  10  -2  12 1133.89   35.10
  10   2 -12 1128.79   34.80
  10   2 -12 1168.98   42.50
  10  -2  12 1077.69   38.10
 -10   2  12 1171.78   39.70
 -10   2 -12 1124.89   38.80
 -10   2 -12 1048.30   34.70
  10   2  12 1107.49   39.20
  10   2  12 1135.09   41.50
  10  -2 -12 1060.59   35.70
 -10   2 -12 1141.59   37.50
 -10  -2  12 1139.29   38.40
  10  -2 -12 1143.09   35.90
  10  -2 -12 1146.69   39.60
 -10  -2  12 1165.68   38.30
  10  -4  12  163.78   10.10
  10   4 -12  143.59    8.90
 -10  -4 -12  148.39   11.70
  10  -4  12  158.48   10.10
 -10   4  12  159.28    9.60
  10   4 -12  158.58   11.00
 -10   4  12  160.58   11.30
  10   4  12  155.18   11.10
 -10  -4  12  154.28   10.00
  10  -4 -12  143.39   11.20
 -10  -4  12  151.48    9.00
 -10   4 -12  162.18    9.70
  10  -4 -12  145.79    9.80
  10   4  12  145.29   11.20
 -10  -4  12  153.88   15.70
 -10  -6 -12   98.09    4.80
 -10   6  12   96.99    9.20
 -10  -6 -12   96.09   10.40
  10  -6  12   91.09    8.80
  10   6 -12  111.09    8.50
  10  -6  12  103.89    7.90
  10   6 -12   98.79    8.60
 -10  -6 -12   92.29    4.80
 -10   6  12  105.79    8.30
  10   6  12   97.99    9.10
 -10   6 -12   93.49    9.40
  10   6  12  101.79    9.70
 -10  -6  12  101.19    9.80
 -10   6 -12  111.19    7.70
  10  -6 -12  114.69   10.20
 -10  -6  12  105.69    7.80
  10  -6 -12   99.59    9.20
 -10  -8 -12  138.59    7.80
  10   8 -12  163.08   11.50
 -10   8  12  135.79   11.40
 -10   8  12  127.99   11.20
  10   8 -12  155.88    8.60
  10  -8  12  148.49    9.00
 -10  -8 -12  163.48   14.00
  10  -8  12  162.78   12.80
  10   8 -12  141.49   11.00
 -10   8 -12  144.49    8.70
  10  -8 -12  121.79   11.20
 -10  -8  12  142.89   12.80
  10   8  12  165.38   13.00
  10  -8 -12  163.88   13.10
  10   8  12  168.68   12.20
  10  -8 -12  144.99   10.80
 -10   8 -12  147.99   12.80
  10 -10  12  198.98    9.10
  10  10 -12  222.38   14.00
 -10 -10 -12  228.38   11.80
 -10  10  12  216.98   15.40
  10  10 -12  199.28   14.60
 -10 -10 -12  204.48   16.80
  10  10  12  221.08   24.50
  10 -10 -12  223.58   14.60
  10 -10 -12  181.28   14.40
 -10  10 -12  208.48   10.30
 -10 -10  12  222.08   17.10
  10 -10 -12  205.88   14.70
  10 -10 -12  200.08   16.00
  10  10  12  210.18   14.10
 -10 -12 -12   11.70    5.00
  10  12 -12   26.70    6.20
  10  12 -12   20.70    6.10
  10 -12  12   20.00    6.30
 -10 -12 -12   22.00    5.20
  10 -12 -12   27.60    6.20
  10  12  12   21.70    5.60
  10 -12 -12   15.60    5.50
  10  12  12    9.30    5.10
  10 -12 -12   21.80    6.80
  10 -12 -12   14.00    5.10
 -10 -12  12   31.10    8.00
 -10  12 -12   21.50    6.70
 -10   0 -14 1495.45   43.50
 -10   0  14 1542.25   48.60
 -10   0  14 1442.46   46.20
 -10   0 -14 1596.34   51.19
  10   0  14 1579.14   43.90
 -10   0 -14 1584.04   51.39
 -10   0  14 1515.85   51.29
  10   0 -14 1542.75   51.69
  10   0 -14 1514.45   46.10
  10   0  14 1537.65   51.49
  10   2 -14  899.01   29.60
 -10   2  14  874.51   34.30
 -10   2  14  894.61   30.80
  10  -2  14  877.91   29.30
  10   2 -14  871.81   33.80
 -10  -2 -14  880.51   34.30
  10  -2  14  902.11   33.70
  10  -2 -14  898.11   34.60
  10   2  14  912.41   34.40
 -10  -2  14  827.82   29.20
 -10  -2  14  916.41   32.80
  10  -2 -14  842.22   30.00
 -10   2 -14  920.41   33.90
 -10   2 -14  837.12   29.00
  10   2  14  896.41   34.60
 -10   2 -14  909.11   32.80
 -10  -2  14  908.91   33.60
  10  -4  14  259.77   13.90
  10   4 -14  256.57   13.20
 -10   4  14  266.27   16.40
  10   4 -14  291.67   16.20
  10  -4  14  247.68   14.60
 -10   4  14  278.17   13.60
 -10  -4 -14  304.17   17.80
  10  -4 -14  280.07   14.80
  10   4  14  252.27   16.10
  10  -4 -14  277.57   16.80
 -10   4 -14  242.88   13.90
 -10   4 -14  269.37   15.90
  10   4  14  276.17   16.50
 -10  -4  14  258.37   15.50
 -10  -4  14  275.27   15.00
 -10   6  14  104.59    8.00
  10  -6  14   93.09    9.10
  10   6 -14   84.19    7.80
 -10  -6 -14   86.89    9.90
  10  -6  14   85.09    7.70
  10   6 -14   94.59    9.10
 -10   6  14  100.19   10.00
 -10  -6  14   71.29    9.00
 -10  -6  14   89.69    7.70
  10   6  14   89.69    9.60
  10  -6 -14  103.49   10.60
  10   6  14   83.79    9.10
 -10   6 -14   74.39    7.10
  10  -6 -14   86.39    9.10
 -10   6 -14   73.39    8.60
 -10   8  14  186.98   14.20
 -10  -8 -14  178.08   15.30
  10   8 -14  167.88   10.50
  10  -8  14  206.38   15.20
  10   8 -14  186.48   13.00
 -10  -8 -14  193.78    8.70
  10   8 -14  178.28   13.10
 -10  -8  14  181.38   15.00
  10   8  14  188.58   15.10
 -10   8 -14  174.88   14.20
  10  -8 -14  187.68   12.40
  10  -8 -14  178.08   14.50
 -10   8 -14  199.48   11.40
  10  -8 -14  190.48   14.50
  10   8  14  209.08   14.70
  10 -10  14  298.87   13.50
  10 -10  14  308.27   21.10
 -10 -10 -14  366.76   23.40
  10  10 -14  305.57   18.70
  10  10 -14  315.57   18.00
 -10 -10  14  312.47   22.00
  10 -10 -14  281.67   19.70
 -10  10 -14  312.77   14.40
  10 -10 -14  347.37   25.10
 -10  10 -14  306.57   20.50
  10 -10 -14  321.27   17.80
  10 -10 -14  289.17   20.80
  10  10  14  302.77   20.60
  10  10  14  343.67   19.40
  10   0 -16    3.70    2.50
 -10   0  16   -1.70    2.20
 -10   0 -16    2.20    1.50
  10   0 -16   -0.60    1.60
 -10   0 -16   -1.00    2.10
  10   0  16    4.90    3.30
 -10   0  16    0.50    2.00
 -10   0 -16   -1.30    1.80
  10   2 -16   21.30    5.40
 -10   2  16   23.90    4.50
 -10   2  16   21.70    5.60
  10   2 -16   27.10    4.50
  10  -2  16   26.70    5.80
 -10  -2 -16   27.50    6.10
 -10  -2 -16   15.80    4.60
  10  -2  16   25.40    4.40
  10  -2 -16   31.10    6.90
 -10  -2  16   24.30    5.60
 -10   2 -16   21.90    5.30
  10  -2 -16   20.90    4.10
 -10   2 -16   28.00    6.00
 -10  -2  16   14.50    4.30
  10   2  16   29.40    6.90
  10   4 -16   74.49    8.70
 -10   4  16   64.39    6.50
  10   4 -16   78.29    7.10
  10  -4  16   88.49    7.90
 -10   4  16   88.99    9.70
 -10  -4 -16   71.89    9.10
  10  -4  16   91.09    8.80
  10   4  16   66.89    8.90
 -10   4 -16   86.79    8.40
  10  -4 -16   76.99    9.60
 -10  -4  16   86.49    9.30
 -10  -4  16   85.69    8.60
  10   4  16   72.19    8.80
 -10   4 -16   93.49    9.30
  10   6 -16  289.67   15.70
 -10   6  16  268.37   14.40
 -10  -6 -16  299.67   19.80
  10  -6  16  279.57   16.50
  10  -6  16  267.27   15.60
 -10   6  16  269.97   18.30
  10   6 -16  301.67   17.70
 -10  -6  16  268.37   15.70
  10  -6 -16  300.17   17.70
  10  -6 -16  302.77   19.60
  10   6  16  276.37   18.30
 -10   6 -16  307.77   16.00
 -10  -6  16  277.17   18.10
 -10   6 -16  256.37   17.30
  10   8 -16   63.99    7.80
 -10  -8 -16   57.19   10.80
  10  -8  16   56.99    9.90
  10  -8  16   48.70    6.40
 -10   8  16   44.20    9.00
  10   8 -16   54.59    8.60
  10   8 -16   43.90    6.80
 -10   8 -16   65.99    6.90
  10  -8 -16   79.99   12.30
 -10   8 -16   51.59   15.30
  10  -8 -16   63.89   10.10
  10   8  16   44.50    8.80
  10  -8 -16   46.00    6.40
 -10  -8  16   45.60    9.10
  10   8  16   62.29   10.70
  10   0  18  204.68    9.90
 -10   0  18  190.48   15.00
  10   0 -18  196.78   14.90
 -10   0  18  238.38   13.50
 -10   0 -18  205.98   14.70
  10   0 -18  182.68   11.20
  10   0  18  237.18   16.60
 -10   0 -18  199.28   14.80
 -10   2  18  258.97   14.00
 -10  -2 -18  277.27   18.60
  10   2 -18  277.67   18.20
 -10   2  18  260.07   20.10
  10  -2  18  271.27   17.70
  10  -2  18  282.37   13.10
 -10  -2 -18  272.47   17.50
  10   2 -18  278.77   14.00
 -10  -2  18  266.77   15.70
 -10   2 -18  290.77   17.60
  10  -2 -18  264.47   20.40
  10  -2 -18  259.17   14.30
  10   2  18  268.37   20.90
 -10   2 -18  272.87   17.10
 -10  -2  18  272.37   17.60
 -10  -4 -18  285.57   19.70
  10   4 -18  270.27   16.70
 -10  -4 -18  303.27   19.40
  10  -4  18  304.67   18.20
  10  -4  18  291.67   15.60
 -10   4  18  269.17   14.20
 -10   4  18  275.67   19.00
  10   4 -18  279.47   18.00
  10  -4 -18  288.27   16.40
  10   4  18  295.67   19.40
 -10  -4  18  282.87   17.30
 -10  -4  18  298.17   17.80
 -10   4 -18  305.57   18.60
 -10   4 -18  298.17   17.50
  10  -4 -18  290.37   19.90
  10   6 -18   38.10    6.30
 -10  -6 -18   34.10    8.60
  10  -6  18   30.80    6.50
  10  -6  18   36.00    7.00
 -10   6  18   27.80    7.50
 -10  -6  18   40.90    6.90
 -10   6 -18   47.20    7.60
  10   6  18   26.10    7.00
 -10  -6  18   37.50    8.00
  10  -6 -18   40.80    9.00
  10   6  18   49.10    9.60
 -10   6 -18   51.69    9.30
  10  -6 -18   41.90    6.30
  10  -6 -18   33.90    7.30
 -10   8  18   20.80    6.40
  10   8 -18    9.70    4.30
  10   8 -18   24.60    6.00
  10  -8  18   19.60    6.30
  10   8 -18   19.90    6.50
 -10  -8 -18   24.10    7.50
  10  -8  18   16.80    5.00
  10  -8 -18   18.60    4.70
  10  -8 -18   18.00    6.70
 -10   8 -18   24.10    5.40
  10   8  18   25.70    7.70
 -10   8 -18   21.40    6.60
  10   8  18   33.00    8.40
 -10  -8  18   21.10    7.10
  10  -8 -18   23.60   10.60
  10   0 -20    1.10    2.40
  10   0 -20    1.20    3.00
 -10   0  20    0.00    3.20
 -10   0 -20    2.10    3.20
  10   0  20    0.20    3.00
 -10   0 -20    3.10    3.70
 -10   0  20    0.60    2.30
 -10  -2 -20   72.39   11.60
  10  -2  20   50.29    9.40
 -10   2  20   66.09    6.80
  10  -2  20   58.69    6.00
  10   2 -20   76.69   10.10
 -10  -2 -20   74.49   11.30
  10   2 -20   68.69    7.00
 -10   2  20   73.09   10.00
 -10   2 -20   71.09    9.30
  10  -2 -20   66.59    7.50
 -10  -2  20   59.39    9.90
 -10   2 -20   67.99   10.30
  10   2  20   64.89   11.30
 -10  -2  20   69.79    8.50
  10  -2 -20   73.29   12.30
  10   4 -20   60.09    9.80
 -10   4  20   54.79   10.00
 -10  -4 -20   72.39   11.20
  10  -4  20   72.79    9.50
  10  -4  20   56.89    7.20
  10   4 -20   60.49    7.30
 -10  -4 -20   49.00    9.60
  10   4  20   59.49   10.80
 -10  -4  20   53.19    9.40
 -10   4 -20   61.09   16.40
  10  -4 -20   55.79   10.40
 -10  -4  20   59.09    9.30
  10  -4 -20   66.19    8.20
 -11  -1  -1 1697.13   46.10
  11  -1   1 1675.23   45.30
  11   1  -1 1728.63   47.00
 -11   1   1 1711.93   45.80
 -11  -1  -1 1722.23   47.00
  11   1  -1 1697.33   45.90
  11   1  -1 1671.23   46.90
  11  -1   1 1759.12   46.70
  11  -1   1 1691.13   46.70
 -11  -1  -1 1674.03   46.70
 -11   1   1 1767.12   47.40
  11   1  -1 1663.63   46.50
 -11   1   1 1738.93   46.90
  11  -1   1 1718.33   46.90
 -11   1   1 1744.13   45.90
 -11  -1  -1 1633.24   47.00
 -11   1  -1 1695.33   46.80
  11  -1  -1 1701.53   46.90
 -11  -1   1 1779.62   47.30
  11   1   1 1753.72   46.10
 -11   1  -1 1664.73   45.20
  11  -1  -1 1688.53   45.80
 -11   1  -1 1701.63   46.80
 -11  -1   1 1718.53   46.90
  11   1   1 1765.02   47.00
  11  -1  -1 1674.93   47.10
  11   1   1 1737.43   46.80
 -11  -1   1 1672.33   46.40
  11   1   1 1687.43   46.90
 -11  -1   1 1753.42   45.90
 -11   1  -1 1645.54   46.70
  11  -1  -1 1649.04   45.80
  11   3  -1 1306.77   34.80
 -11  -3  -1 1247.98   36.80
  11  -3   1 1230.18   36.80
  11   3  -1 1259.27   36.70
 -11  -3  -1 1248.98   35.90
 -11  -3  -1 1215.98   37.20
  11  -3   1 1262.17   37.20
 -11  -3  -1 1248.68   37.30
 -11   3   1 1242.68   37.20
  11  -3   1 1269.67   37.20
  11   3  -1 1336.67   37.00
  11  -3   1 1242.98   35.30
 -11   3   1 1209.08   35.40
 -11  -3  -1 1206.58   35.10
  11   3  -1 1342.37   36.90
 -11   3  -1 1245.28   37.00
  11  -3  -1 1253.27   35.50
 -11  -3   1 1259.77   36.30
 -11  -3   1 1186.28   36.40
 -11  -3   1 1264.57   36.90
 -11  -3   1 1250.37   34.70
  11  -3  -1 1276.37   37.20
  11   3   1 1174.48   35.60
  11   3   1 1196.08   35.10
  11  -3  -1 1283.17   36.70
  11   3   1 1207.68   36.80
  11  -3  -1 1322.17   34.40
 -11   3  -1 1253.27   35.10
  11  -3  -1 1288.17   34.20
  11   5  -1 3240.98   88.89
 -11  -5  -1 3128.39   84.49
 -11  -5  -1 3116.09   87.79
 -11   5   1 3255.77   84.39
  11   5  -1 2988.90   87.79
 -11  -5  -1 3168.88   89.09
  11   5  -1 3161.38   83.49
  11  -5   1 3089.89   88.99
  11   5  -1 3129.49   87.59
  11  -5   1 3123.99   88.89
 -11   5   1 3236.58   88.89
 -11  -5  -1 3192.78   87.69
  11  -5   1 3202.78   84.79
  11  -5   1 3200.68   88.89
 -11   5  -1 3117.39   82.79
  11  -5  -1 3286.77   85.29
 -11  -5   1 3242.08   88.69
 -11  -5   1 3158.18   83.49
  11  -5  -1 3165.78   89.09
  11   5   1 3053.79   87.29
  11  -5  -1 3212.98   85.29
  11  -5  -1 3154.98   84.49
 -11  -5   1 3077.09   87.49
  11   5   1 3213.78   84.49
  11   5   1 3117.49   89.19
  11  -5  -1 3228.88   89.09
 -11   5  -1 3125.79   84.39
  11  -5  -1 3170.48   88.69
 -11  -5   1 3192.68   88.39
  11   5   1 3220.58   88.19
 -11   5  -1 3210.68   89.19
  11  -7   1 2503.75   66.09
  11  -7   1 2410.46   65.99
 -11  -7  -1 2401.86   65.99
  11  -7   1 2466.35   66.29
 -11   7   1 2438.26   73.29
  11  -7   1 2474.55   73.39
  11   7  -1 2511.25   73.69
  11   7  -1 2446.36   71.09
 -11   7   1 2401.66   68.69
 -11  -7  -1 2537.65   72.19
  11   7   1 2506.85   65.89
 -11  -7   1 2485.45   72.79
  11   7   1 2425.76   71.49
  11  -7  -1 2432.26   66.99
  11  -7  -1 2320.57   67.29
  11  -7  -1 2414.36   72.99
 -11   7  -1 2480.65   65.99
 -11   7  -1 2507.45   73.69
  11   7   1 2507.75   74.09
  11   9  -1  171.88   10.80
 -11   9   1  183.28   12.80
  11  -9   1  172.58    5.70
 -11  -9  -1  174.48   12.00
  11  -9   1  170.88    7.70
  11   9  -1  187.78   13.10
 -11   9   1  170.58    8.40
  11  -9   1  168.98   12.20
  11  -9  -1  169.18    7.40
  11  -9  -1  170.58    7.20
 -11  -9   1  193.98   12.60
  11   9   1  178.28   11.20
  11   9   1  178.68   13.10
 -11   9  -1  179.68   12.90
 -11   9  -1  172.98    7.80
  11  -9  -1  170.28    8.70
  11  -9  -1  164.28   11.90
 -11  11   1  246.18   11.60
  11 -11   1  228.38   16.20
  11  11  -1  251.57   17.30
 -11  11   1  249.88   17.10
 -11 -11  -1  280.57   17.00
  11 -11   1  239.68   10.70
  11  11  -1  284.87   15.30
 -11  11  -1  257.87   17.40
 -11  11  -1  271.67   11.00
  11  11   1  284.57   15.60
  11 -11  -1  223.08   11.50
  11 -11  -1  247.88   16.90
 -11 -11   1  281.97   17.40
  11  11   1  271.87   18.10
  11  13  -1  353.96   18.70
 -11  13   1  354.46   22.70
  11 -13   1  363.36   22.80
 -11  13   1  358.76   14.90
  11  13  -1  338.27   22.80
 -11  13  -1  319.97   22.00
 -11 -13   1  376.86   22.30
 -11  13  -1  345.77   13.50
  11  13   1  360.26   23.30
  11  13   1  342.47   18.70
  11 -13  -1  369.66   22.80
  11   1  -3 2579.44   74.09
  11   1  -3 2693.23   73.99
 -11  -1  -3 2809.82   71.39
  11  -1   3 2860.11   72.99
 -11  -1  -3 2666.53   73.89
  11  -1   3 2837.12   72.39
 -11  -1  -3 2613.04   73.89
 -11   1   3 2690.23   73.39
  11  -1   3 2832.82   73.09
 -11   1   3 2705.23   74.29
  11   1  -3 2686.83   71.29
 -11   1   3 2749.32   71.79
 -11  -1  -3 2713.23   74.79
  11  -1   3 2837.82   74.49
  11   1  -3 2620.54   73.39
  11  -1  -3 2793.12   73.69
 -11   1  -3 2734.33   74.39
  11   1   3 2833.32   71.29
  11  -1  -3 2675.93   71.79
 -11  -1   3 2818.62   74.69
 -11   1  -3 2772.62   72.39
 -11  -1   3 2826.62   71.19
  11  -1  -3 2532.05   73.79
 -11   1  -3 2728.43   73.89
  11  -1  -3 2681.73   74.19
  11  -1  -3 2669.93   74.19
  11   1   3 2753.02   74.59
 -11  -1   3 2723.73   73.89
  11   3  -3  888.91   28.20
 -11   3   3  956.90   28.30
 -11  -3  -3  923.21   29.60
  11  -3   3  955.40   29.00
 -11  -3  -3  906.81   29.60
 -11  -3  -3  911.41   26.60
  11   3  -3  898.21   26.50
 -11  -3  -3  889.71   27.60
  11  -3   3  944.41   29.10
  11   3  -3  917.71   26.60
  11   3  -3  885.81   28.80
  11  -3   3  921.11   27.30
  11  -3   3  983.40   29.10
 -11  -3  -3  938.51   28.90
 -11   3   3  955.00   29.00
  11   3  -3  914.71   27.60
  11  -3  -3  930.41   28.10
  11  -3  -3  903.11   28.60
 -11   3  -3  917.61   24.60
  11  -3  -3  959.80   27.50
 -11  -3   3  933.41   27.50
  11   3   3 1014.10   29.50
 -11   3  -3  925.91   29.10
  11   3   3  933.11   26.60
  11  -3  -3  939.01   27.30
 -11   3  -3  915.71   24.60
 -11  -3   3  937.51   29.30
 -11   3  -3  903.31   27.10
  11  -3  -3  901.11   27.90
 -11  -3   3  886.81   28.20
  11  -3  -3  914.31   28.10
  11  -5   3  954.00   31.30
 -11  -5  -3  941.71   29.00
  11   5  -3  885.91   30.70
  11   5  -3  909.91   25.90
  11   5  -3  916.81   30.20
  11  -5   3  914.41   31.30
  11   5  -3  917.21   26.00
 -11   5   3  934.11   28.10
 -11   5   3  959.30   30.80
 -11  -5  -3  920.91   33.80
 -11  -5  -3  915.21   30.20
  11   5  -3  945.91   29.90
  11  -5   3  937.01   32.70
  11  -5   3  935.91   27.20
 -11   5   3  941.01   30.90
 -11  -5  -3  928.41   28.10
  11  -5   3  926.71   25.00
 -11  -5  -3  969.90   32.10
 -11   5  -3  926.51   26.90
 -11  -5   3  904.81   29.80
  11   5   3  962.00   29.10
  11  -5  -3  928.21   28.60
 -11  -5   3  854.21   29.20
  11  -5  -3  940.51   30.80
  11   5   3  945.71   30.80
  11  -5  -3  894.11   27.80
 -11   5  -3  886.61   30.60
 -11   5  -3  924.31   31.20
  11  -5  -3  949.21   28.60
 -11  -5   3  879.11   30.80
  11   5   3  969.30   28.20
  11  -5  -3  918.21   30.70
  11  -5  -3  921.11   30.50
 -11   5  -3  937.11   24.90
 -11   7   3   39.00    3.90
 -11   7   3   34.80    5.80
  11   7  -3   46.80    4.90
  11  -7   3   41.70    2.60
 -11  -7  -3   47.00    5.90
  11  -7   3   42.00    2.80
 -11  -7  -3   41.40    4.70
  11  -7   3   46.20    5.60
  11   7  -3   33.70    5.70
 -11  -7  -3   41.70    3.60
  11  -7  -3   47.60    5.60
  11   7   3   45.80    5.30
 -11  -7   3   39.90    6.40
  11   7   3   49.50    3.90
 -11   7  -3   43.30    2.60
  11  -7  -3   38.20    3.80
 -11   7  -3   46.20    2.90
  11  -7  -3   36.70    4.00
 -11   7  -3   35.40    5.80
  11  -7  -3   37.50    3.70
  11   7   3   45.60    5.80
 -11  -9  -3  516.95   17.50
  11   9  -3  520.85   24.10
 -11   9   3  532.55   19.70
  11   9  -3  541.25   21.90
 -11   9   3  561.64   25.00
 -11  -9  -3  558.84   23.10
  11  -9   3  529.55   16.70
  11  -9   3  539.95   24.60
 -11   9  -3  531.85   24.70
  11   9   3  525.95   25.00
  11  -9  -3  524.35   18.60
  11   9   3  550.84   20.20
  11  -9  -3  504.45   18.10
  11  -9  -3  536.55   23.90
 -11  -9   3  546.25   24.70
  11  -9  -3  504.35   19.60
 -11   9  -3  538.35   16.70
 -11 -11  -3  292.27   17.10
 -11 -11  -3  303.87   19.80
  11 -11   3  285.07   11.00
 -11  11   3  326.97   19.70
  11 -11   3  315.27   19.30
  11  11  -3  303.07   16.00
  11  11  -3  297.77   19.00
 -11  11   3  310.57   14.00
  11  11   3  293.97   19.40
  11  11   3  291.97   16.60
 -11 -11   3  325.87   19.30
  11 -11  -3  280.47   11.00
  11 -11  -3  299.67   11.60
  11 -11  -3  305.97   18.60
 -11  11  -3  286.57   18.60
  11 -13   3  200.68   16.90
 -11  13   3  208.08   11.80
 -11  13   3  223.88   17.80
 -11 -13  -3  227.38   16.30
  11  13  -3  215.68   17.70
  11  13  -3  224.78   14.10
 -11 -13  -3  224.28   18.40
 -11 -13   3  212.98   17.10
  11 -13  -3  241.08   17.70
  11  13   3  231.98   15.20
 -11  13  -3  243.98   18.40
  11   1  -5 1474.85   44.30
  11  -1   5 1485.55   42.20
 -11   1   5 1565.34   44.10
  11  -1   5 1575.44   42.40
  11  -1   5 1526.65   44.30
 -11  -1  -5 1563.94   45.40
  11  -1   5 1496.65   44.50
  11   1  -5 1487.85   43.70
  11   1  -5 1544.85   40.80
 -11  -1  -5 1569.64   44.50
 -11   1   5 1581.04   44.60
 -11  -1  -5 1525.25   44.00
 -11   1   5 1499.55   44.20
  11   1  -5 1501.15   44.30
  11  -1   5 1493.15   42.70
  11   1   5 1566.34   44.60
  11  -1  -5 1549.94   41.50
  11   1   5 1500.35   44.80
 -11   1  -5 1478.25   44.00
 -11  -1   5 1493.55   44.50
  11  -1  -5 1571.94   41.60
  11  -1  -5 1539.25   44.30
 -11   1  -5 1529.65   42.70
 -11   1  -5 1508.65   44.80
  11  -1  -5 1597.14   44.60
 -11  -1   5 1559.94   44.10
 -11  -1   5 1474.75   44.00
 -11  -1   5 1544.35   40.80
  11   1   5 1562.84   44.20
  11  -1  -5 1560.44   44.20
 -11  -3  -5  875.01   28.60
 -11  -3  -5  892.81   25.60
  11   3  -5  957.30   27.60
 -11  -3  -5  861.01   29.00
  11  -3   5  896.81   28.80
  11  -3   5  897.21   28.00
  11   3  -5  926.31   27.40
  11   3  -5  937.71   29.90
 -11   3   5  939.81   29.20
 -11   3   5  940.81   29.20
 -11  -3  -5  910.71   25.50
  11  -3   5  891.01   29.30
 -11  -3  -5  911.01   30.50
  11   3  -5  971.90   29.30
 -11   3   5  883.31   29.60
 -11   3  -5  968.70   30.10
  11   3   5  887.61   29.50
  11   3   5  885.31   28.80
  11  -3  -5  930.01   28.80
 -11   3  -5  954.10   26.30
 -11   3  -5  919.71   28.80
 -11  -3   5  923.71   27.20
  11   3   5  861.31   29.90
 -11   3  -5  959.50   26.20
  11  -3  -5  912.11   28.10
  11  -3  -5  908.71   29.00
  11  -3  -5  936.51   28.60
  11  -3  -5  915.11   29.00
 -11  -3   5  934.61   30.00
 -11   3  -5  945.81   28.00
 -11  -5  -5 1024.90   34.50
  11  -5   5 1002.20   29.60
  11   5  -5  999.90   28.60
 -11  -5  -5 1014.10   30.00
  11   5  -5  980.30   28.50
 -11   5   5  986.60   31.20
  11  -5   5 1001.30   33.40
  11   5  -5  996.40   31.90
 -11   5   5  998.30   32.60
 -11   5   5  994.70   31.40
 -11   5   5  984.80   32.50
  11   5  -5  988.70   31.80
 -11  -5  -5  952.50   30.90
  11  -5  -5 1030.10   31.90
 -11   5  -5  952.10   33.20
 -11   5  -5  979.90   29.30
 -11   5  -5  979.30   27.60
  11  -5  -5  943.91   32.20
 -11  -5   5  969.60   31.60
  11  -5  -5  965.00   30.80
  11   5   5 1000.80   31.10
  11  -5  -5  975.50   31.30
  11   5   5  997.10   29.90
 -11  -5   5  962.50   31.30
  11  -5  -5  976.90   32.30
 -11  -5   5 1006.10   33.70
  11   5   5  991.20   33.00
 -11   5  -5  970.50   27.60
  11  -7   5  410.66   13.80
 -11  -7  -5  430.96   16.70
 -11  -7  -5  458.95   17.90
 -11   7   5  457.05   20.30
  11  -7   5  435.66   14.40
  11   7  -5  454.85   19.70
 -11   7   5  470.05   17.80
 -11  -7  -5  479.95   21.70
  11   7  -5  448.96   18.40
 -11  -7  -5  422.36   17.80
  11  -7   5  452.15   20.50
  11   7  -5  441.16   12.80
  11   7   5  435.46   19.40
  11   7   5  454.55   17.00
 -11   7  -5  438.76   13.90
 -11   7  -5  421.86   14.30
 -11  -7   5  452.75   20.60
  11  -7  -5  495.55   18.20
  11  -7  -5  422.96   18.70
 -11   7  -5  421.36   20.20
  11  -7  -5  476.05   20.10
  11  -7  -5  464.25   17.40
 -11   9   5  411.46   17.60
  11   9  -5  441.86   21.30
  11  -9   5  388.06   13.50
 -11  -9  -5  424.76   19.00
 -11   9   5  444.66   21.80
  11   9  -5  417.66   18.60
 -11  -9  -5  381.46   15.70
 -11  -9  -5  447.66   22.80
  11  -9   5  432.96   21.70
 -11   9  -5  418.46   13.60
  11   9   5  404.56   19.80
  11   9   5  428.16   16.30
 -11  -9   5  440.06   22.00
  11  -9  -5  424.66   20.70
 -11   9  -5  408.06   21.10
  11  -9  -5  422.06   17.00
 -11  11   5   51.79    5.90
  11  11  -5   65.09   10.10
 -11 -11  -5   53.99    9.60
  11  11  -5   52.19    6.30
 -11 -11  -5   48.20    6.50
  11 -11   5   54.59    9.20
  11 -11   5   47.70    3.50
 -11  11   5   46.40    8.60
 -11 -11   5   63.79   10.30
 -11  11  -5   50.79    9.00
  11 -11  -5   38.20    7.90
 -11  11  -5   50.79    3.30
  11  11   5   53.79    4.50
  11  11   5   57.89    7.60
  11 -11  -5   52.99    5.10
  11 -11  -5   55.89    9.50
 -11  13   5   87.79    8.30
 -11  13   5   97.49   12.20
 -11 -13  -5   84.49   13.90
 -11 -13  -5   82.19    9.70
  11  13  -5  110.29    9.80
  11 -13   5   82.19   13.10
  11  13  -5   92.09   11.50
 -11  13  -5   64.39   11.10
 -11 -13   5   88.89   11.50
  11  13   5   87.19    9.60
  11 -13  -5   97.09   10.90
 -11   1   7  420.96   16.60
  11  -1   7  435.86   16.80
  11   1  -7  396.76   13.20
  11   1  -7  403.06   16.30
  11  -1   7  442.76   14.10
 -11  -1  -7  485.55   17.90
 -11  -1  -7  453.75   16.90
  11  -1   7  457.95   15.70
 -11  -1  -7  459.35   16.40
  11  -1   7  466.65   16.90
 -11   1   7  424.76   16.00
  11   1  -7  386.16   15.60
  11  -1  -7  399.56   15.80
  11  -1  -7  414.16   16.40
  11   1   7  456.95   17.20
 -11   1  -7  438.76   17.00
  11  -1  -7  391.26   13.80
 -11   1  -7  420.66   16.20
  11  -1  -7  437.96   16.80
 -11  -1   7  403.06   16.10
  11   1   7  472.65   16.70
 -11   1  -7  428.66   14.10
 -11  -1   7  424.96   16.50
 -11  -1   7  402.46   13.30
  11  -1  -7  419.86   13.80
 -11  -1   7  376.06   15.80
  11   1   7  451.15   17.00
  11  -1  -7  415.36   16.30
 -11   1  -7  424.36   15.30
 -11  -3  -7  420.26   12.00
 -11   3   7  470.75   17.00
  11   3  -7  453.95   16.10
 -11   3   7  450.65   17.60
 -11  -3  -7  406.66   12.00
 -11  -3  -7  413.16   16.90
  11  -3   7  451.05   16.80
 -11  -3  -7  407.66   18.10
  11   3  -7  437.26   17.60
  11   3  -7  482.75   17.60
  11  -3   7  418.56   16.30
  11  -3   7  421.96   17.30
 -11   3  -7  423.36   17.70
 -11   3  -7  437.16   15.10
  11  -3  -7  449.95   17.30
  11  -3  -7  447.16   16.10
  11  -3  -7  485.55   16.70
  11  -3  -7  465.25   17.30
 -11  -3   7  430.46   16.90
 -11   3  -7  426.46   17.60
 -11   3  -7  406.66   16.10
 -11  -3   7  451.55   15.10
  11   3   7  343.47   20.30
 -11  -3   7  436.16   17.70
  11   3   7  441.96   17.70
  11  -3  -7  448.86   18.40
  11  -3  -7  471.65   17.80
 -11   3  -7  424.36   14.90
  11   3   7  419.86   17.10
 -11  -3   7  472.05   16.50
 -11  -5  -7  499.95   21.50
  11   5  -7  492.25   16.80
  11   5  -7  472.35   18.90
 -11   5   7  458.35   18.90
  11  -5   7  492.75   17.40
 -11   5   7  481.05   19.50
  11   5  -7  470.55   16.70
 -11  -5  -7  502.55   16.20
 -11   5   7  483.15   19.10
 -11  -5  -7  485.75   16.30
  11   5  -7  480.15   18.60
 -11   5   7  465.85   19.10
  11  -5   7  481.05   20.00
 -11   5  -7  499.05   20.60
  11  -5  -7  452.75   19.00
  11   5   7  500.75   19.10
 -11   5  -7  517.55   16.20
 -11  -5   7  451.75   17.90
  11   5   7  473.05   20.10
 -11  -5   7  492.15   20.80
 -11   5  -7  506.25   17.40
 -11   5  -7  527.55   16.30
  11   7  -7  196.68    7.90
  11  -7   7  197.08    8.80
  11   7  -7  207.88    8.20
  11   7  -7  221.78   12.60
 -11  -7  -7  227.98   10.60
 -11   7   7  195.28   12.50
 -11   7   7  200.88   11.40
 -11  -7  -7  243.68   14.70
  11   7  -7  205.28   11.50
 -11  -7  -7  200.98   10.40
  11  -7   7  191.68   16.40
 -11   7   7  200.38   11.30
  11  -7  -7  200.48   11.50
 -11  -7   7  198.08   13.10
  11  -7  -7  209.08   12.30
 -11   7  -7  212.28    9.00
  11   7   7  182.38   13.90
 -11   7  -7  213.98    8.50
 -11   7  -7  213.98    8.50
  11   7   7  210.48   11.10
 -11   7  -7  214.88   13.40
 -11  -9  -7  121.99   11.50
  11  -9   7  109.59    4.60
  11  -9   7  118.39   10.90
  11   9  -7  110.49    9.80
  11   9  -7  128.29    9.40
 -11  -9  -7  123.59    8.80
 -11   9   7  121.99   10.90
 -11   9   7  113.89    8.80
  11  -9  -7  108.19    9.40
 -11  -9   7  109.59   10.60
 -11   9  -7  108.39   10.40
 -11   9  -7  110.09    4.50
  11  -9  -7  121.89    8.80
  11   9   7  124.79   10.30
  11   9   7  111.29    8.00
 -11   9  -7  117.99    5.80
 -11   9  -7  110.79    5.60
  11  11  -7   10.40    4.40
 -11  11   7   10.80    3.70
 -11 -11  -7   10.30    5.10
  11 -11   7   10.10    5.10
 -11 -11  -7   14.00    4.20
  11  11  -7    7.80    2.70
 -11  11   7    7.20    4.70
  11 -11  -7   13.70    3.90
 -11  11  -7    7.50    3.80
 -11  11  -7    9.10    1.60
 -11  11  -7    6.00    1.70
  11  11   7   12.20    4.20
  11 -11  -7   15.50    4.90
  11  11   7   17.10    3.70
 -11 -11   7    8.60    4.60
  11 -13   7  268.87   19.80
 -11 -13  -7  264.87   21.00
 -11  13   7  241.48   15.00
  11  13  -7  228.58   17.90
 -11  13   7  243.28   19.40
 -11 -13  -7  259.47   16.50
  11  13  -7  268.17   15.80
  11 -13  -7  243.48   18.10
  11 -13  -7  234.48   12.30
  11  13   7  251.27   17.20
 -11 -13   7  240.68   19.30
  11 -13  -7  266.87   20.50
 -11  13  -7  302.17   20.90
 -11   1   9  408.76   16.90
  11   1  -9  372.46   13.00
  11   1  -9  352.96   15.50
  11  -1   9  393.86   16.50
 -11   1   9  397.46   15.70
 -11  -1  -9  383.96   16.90
  11  -1   9  399.16   15.60
  11  -1   9  382.66   13.30
  11   1  -9  389.36   16.50
 -11   1  -9  369.96   16.40
  11  -1  -9  384.86   13.60
  11   1   9  364.86   16.40
  11   1   9  393.66   16.30
 -11   1  -9  370.66   15.10
 -11  -1   9  391.06   13.20
 -11  -1   9  382.16   16.20
 -11  -1   9  391.06   16.10
  11  -1  -9  364.56   13.60
 -11   1  -9  359.66   13.10
  11  -1  -9  361.96   15.20
  11  -1  -9  372.26   16.50
  11   3  -9 1279.67   36.90
  11   3  -9 1231.48   38.20
 -11   3   9 1212.08   38.30
  11  -3   9 1191.08   38.60
 -11   3   9 1217.68   40.10
 -11  -3  -9 1189.88   41.10
  11   3  -9 1343.27   40.20
  11  -3   9 1208.08   38.00
 -11   3  -9 1205.58   40.20
 -11   3  -9 1159.28   37.60
  11  -3  -9 1251.27   38.10
 -11   3  -9 1245.88   37.60
 -11  -3   9 1230.38   36.50
  11  -3  -9 1198.68   37.80
 -11   3  -9 1213.18   37.20
  11  -3  -9 1275.67   40.50
  11   3   9 1181.88   40.00
 -11  -3   9 1290.77   40.60
  11   3   9 1246.78   40.20
 -11  -3   9 1260.97   38.80
  11  -3  -9 1253.17   38.80
 -11  -5  -9  792.92   23.50
 -11   5   9  807.62   28.20
  11   5  -9  808.22   27.60
  11   5  -9  826.02   28.80
  11   5  -9  830.82   26.80
 -11  -5  -9  806.92   31.30
  11   5  -9  772.82   26.20
 -11  -5  -9  780.72   23.70
  11  -5   9  789.62   26.80
  11  -5   9  793.22   29.20
 -11   5   9  825.62   29.60
 -11   5  -9  795.62   25.60
  11   5   9  773.92   29.80
 -11   5  -9  786.72   30.00
 -11  -5   9  798.12   27.10
 -11   5  -9  798.52   25.60
  11  -5  -9  791.12   29.40
  11   5   9  778.02   28.80
 -11  -5   9  828.02   30.50
  11  -5  -9  851.41   29.50
 -11   5  -9  766.32   26.60
 -11  -5   9  814.52   26.70
 -11  -7  -9  200.28   10.20
 -11  -7  -9  197.48   13.90
  11   7  -9  196.08   12.00
  11   7  -9  188.98    9.00
 -11   7   9  217.28   12.60
  11   7  -9  186.68   11.50
  11  -7   9  202.58   13.30
  11  -7   9  198.18    9.50
 -11  -7  -9  196.38    9.60
  11   7  -9  189.78    8.90
  11  -7  -9  198.88   13.30
  11  -7  -9  217.88   12.50
 -11   7  -9  192.78    8.90
 -11  -7   9  204.28   14.00
 -11   7  -9  193.78    9.60
  11   7   9  210.68   13.30
  11   7   9  219.78   12.40
 -11   7  -9  184.38   12.90
 -11   7  -9  187.68    9.00
  11   9  -9  568.44   25.30
  11   9  -9  582.74   23.80
 -11   9   9  546.95   24.00
 -11  -9  -9  565.64   28.00
  11  -9   9  519.65   17.80
 -11  -9  -9  550.24   21.70
  11  -9   9  579.24   27.20
  11  -9  -9  593.14   24.60
 -11   9  -9  527.35   17.70
 -11   9  -9  510.35   18.10
 -11   9  -9  540.55   18.40
  11  -9  -9  538.85   26.50
 -11   9  -9  551.84   26.70
  11   9   9  560.74   25.80
 -11  -9   9  579.74   27.60
  11  -9  -9  581.44   25.00
 -11 -11  -9  261.97   14.90
  11  11  -9  275.37   15.60
 -11  11   9  284.67   16.30
  11 -11   9  276.97   21.60
  11  11  -9  268.27   17.90
 -11 -11  -9  306.07   20.80
  11  11   9  249.58   17.20
  11  11   9  265.87   14.50
  11 -11  -9  302.47   20.20
 -11 -11   9  294.17   20.10
 -11  11  -9  260.47   10.00
  11 -11  -9  280.87   17.50
  11 -11  -9  281.87   15.50
  11  13  -9   56.89   10.50
 -11  13   9   46.10    7.60
  11  13  -9   65.89    8.30
 -11 -13  -9   53.69    8.10
 -11 -13  -9   74.19   12.70
  11 -13   9   52.99    9.90
  11 -13  -9   55.79    7.10
  11 -13  -9   64.09    8.20
  11 -13  -9   68.39   12.00
  11  13   9   46.30    8.40
 -11 -13   9   62.89   11.60
 -11  13  -9   48.20   10.60
  11 -13  -9   56.99    9.50
 -11  -1 -11  559.34   16.10
  11   1 -11  581.24   19.10
 -11   1  11  575.24   23.20
  11  -1  11  581.64   18.80
  11  -1  11  550.34   22.70
 -11   1  11  570.24   21.40
 -11  -1 -11  562.44   23.20
  11   1 -11  616.64   23.50
  11  -1 -11  536.25   19.60
 -11   1 -11  558.04   18.70
  11   1  11  548.35   22.90
  11  -1 -11  564.44   19.40
  11  -1 -11  569.04   23.30
  11   1  11  552.64   22.40
 -11   1 -11  564.14   21.90
 -11  -1  11  564.74   19.10
 -11   1 -11  568.94   22.90
  11  -1 -11  545.45   21.20
  11   1  11  558.64   15.70
 -11  -1  11  576.64   22.10
 -11  -1  11  583.64   22.90
 -11   3  11  189.68   10.40
 -11  -3 -11  247.48   13.90
  11   3 -11  201.28   11.80
  11   3 -11  182.78    9.40
  11  -3  11  196.48   11.30
  11  -3  11  199.58   10.40
 -11   3  11  182.58   12.30
 -11  -3  11  171.98    9.10
  11   3  11  215.28   12.60
  11   3  11  212.08   14.30
  11  -3 -11  191.78   10.40
  11  -3 -11  197.18   10.50
 -11  -3  11  182.88   11.50
 -11   3 -11  222.48   12.60
 -11   3 -11  218.68   11.10
  11  -3 -11  190.38   12.10
 -11   3 -11  198.68   10.30
 -11  -3  11  174.58   10.80
 -11   5  11  643.44   24.40
 -11  -5 -11  634.64   18.20
  11   5 -11  639.54   23.90
  11   5 -11  651.43   26.00
 -11   5  11  643.84   26.50
 -11  -5 -11  645.74   28.00
  11  -5  11  653.43   24.10
  11  -5  11  651.73   25.60
 -11   5 -11  653.23   26.80
 -11  -5  11  678.33   27.30
  11   5  11  659.43   27.20
  11  -5 -11  610.14   26.30
 -11  -5  11  659.93   24.10
  11  -5 -11  654.53   25.60
 -11   5 -11  656.43   23.10
  11   5  11  633.24   26.00
 -11  -7 -11  117.69   11.10
  11   7 -11  135.29    9.90
  11  -7  11  112.99   10.10
  11   7 -11  125.59    7.70
  11   7 -11  119.19    9.60
 -11   7  11  148.19   10.80
 -11  -7 -11  120.49    6.60
 -11  -7 -11  118.09    6.70
  11  -7  11  103.09    7.50
 -11   7 -11  114.99    7.40
 -11  -7  11  135.59   11.60
  11   7  11  114.39    9.60
  11  -7 -11  135.79   10.60
 -11   7 -11  114.49    7.50
 -11   7 -11  120.09   10.60
  11  -7 -11  140.39   11.20
  11  -7 -11  143.59   10.10
  11   7  11  108.99   10.20
 -11   9  11  463.65   22.00
  11   9 -11  506.15   22.00
  11   9 -11  470.65   22.70
 -11  -9 -11  444.56   24.90
  11  -9  11  471.65   24.50
  11   9 -11  441.86   15.30
  11   9 -11  448.76   15.50
  11  -9  11  438.96   16.70
 -11   9  11  448.86   22.30
 -11  -9 -11  438.66   17.90
 -11   9 -11  464.25   17.00
  11   9  11  442.26   23.60
  11  -9 -11  451.95   22.90
  11   9  11  442.16   21.20
 -11   9 -11  444.86   24.20
 -11  -9  11  486.95   25.40
  11  -9 -11  481.65   24.50
  11  -9 -11  454.65   22.50
 -11   9 -11  427.86   16.70
  11  -9 -11  468.55   21.90
 -11   9 -11  416.36   16.60
 -11 -11 -11   40.40    9.10
 -11 -11 -11   28.10    5.20
  11  11 -11   39.80    7.30
  11  11 -11   27.80    6.50
  11 -11  11   26.10    6.70
 -11  11  11   34.00    6.60
 -11 -11  11   40.70    8.90
  11 -11 -11   34.00    7.00
  11  11  11   30.10    7.20
  11 -11 -11   35.00    9.40
  11 -11 -11   35.70    7.00
  11  11  11   39.20    6.90
 -11  11 -11   29.80    3.70
  11 -11 -11   32.60    6.50
[truncated: 1,089,892 more chars]
