# Supplementary material
Source: MDPI journal article supplement (https://www.mdpi.com/2304-6740/10/10/151)
Supplement: s1 [file s1 › (2) BM498_a.cif]

 
data_BM498_a
 
_audit_creation_method            'SHELXL-2014/7'
_shelx_SHELXL_version_number      '2014/7'
_chemical_name_systematic         ?
_chemical_name_common             ?
_chemical_melting_point           ?
_chemical_formula_moiety          ?
_chemical_formula_sum
 'C16 H21 I5 N4 O8 Zn' 
_chemical_formula_weight          1097.24

loop_
 _atom_type_symbol
 _atom_type_description
 _atom_type_scat_dispersion_real
 _atom_type_scat_dispersion_imag
 _atom_type_scat_source
 'C'  'C'   0.0033   0.0016
 'International Tables Vol C Tables 4.2.6.8 and 6.1.1.4'
 'H'  'H'   0.0000   0.0000
 'International Tables Vol C Tables 4.2.6.8 and 6.1.1.4'
 'N'  'N'   0.0061   0.0033
 'International Tables Vol C Tables 4.2.6.8 and 6.1.1.4'
 'O'  'O'   0.0106   0.0060
 'International Tables Vol C Tables 4.2.6.8 and 6.1.1.4'
 'Zn'  'Zn'   0.2839   1.4301
 'International Tables Vol C Tables 4.2.6.8 and 6.1.1.4'
 'I'  'I'  -0.4742   1.8119
 'International Tables Vol C Tables 4.2.6.8 and 6.1.1.4'
 
_space_group_crystal_system       monoclinic
_space_group_IT_number            14
_space_group_name_H-M_alt         'P 21/n'
_space_group_name_Hall            '-P 2yn'
 
_shelx_space_group_comment
;
The symmetry employed for this shelxl refinement is uniquely defined
by the following loop, which should always be used as a source of
symmetry information in preference to the above space-group names.
They are only intended as comments.
;
 
loop_
 _space_group_symop_operation_xyz
 'x, y, z'
 '-x+1/2, y+1/2, -z+1/2'
 '-x, -y, -z'
 'x-1/2, -y-1/2, z-1/2'
 
_cell_length_a                    11.3642(2)
_cell_length_b                    9.5850(2)
_cell_length_c                    26.8975(6)
_cell_angle_alpha                 90
_cell_angle_beta                  94.0110(10)
_cell_angle_gamma                 90
_cell_volume                      2922.66(10)
_cell_formula_units_Z             4
_cell_measurement_temperature     150(2)
_cell_measurement_reflns_used    9834
_cell_measurement_theta_min        2.78
_cell_measurement_theta_max       30.35
 
_exptl_crystal_description        block
_exptl_crystal_colour             yellow
_exptl_crystal_density_meas       ?
_exptl_crystal_density_method     ?
_exptl_crystal_density_diffrn     2.494          
_exptl_crystal_F_000              2016
_exptl_transmission_factor_min    ?
_exptl_transmission_factor_max    ?
_exptl_crystal_size_max           0.210
_exptl_crystal_size_mid           0.170
_exptl_crystal_size_min           0.100
_exptl_absorpt_coefficient_mu     6.165
_shelx_estimated_absorpt_T_min    0.358
_shelx_estimated_absorpt_T_max    0.578
_exptl_absorpt_correction_type    multi-scan
_exptl_absorpt_correction_T_min   0.6162
_exptl_absorpt_correction_T_max   0.7461
_exptl_absorpt_process_details    ?
_exptl_absorpt_special_details    ?
_diffrn_ambient_temperature       150(2)
_diffrn_radiation_wavelength      0.71073
_diffrn_radiation_type            MoK\a
_diffrn_source                   'Incoatec IuS3.0 microfocus X-ray tube'
_diffrn_measurement_device_type  'Bruker D8 Venture diffractometer'
_diffrn_measurement_method       '\w and \f scans'
_diffrn_detector_area_resol_mean  ?
_diffrn_reflns_number             33369
_diffrn_reflns_av_unetI/netI      0.0198
_diffrn_reflns_av_R_equivalents   0.0298
_diffrn_reflns_limit_h_min        -13
_diffrn_reflns_limit_h_max        13
_diffrn_reflns_limit_k_min        -11
_diffrn_reflns_limit_k_max        11
_diffrn_reflns_limit_l_min        -32
_diffrn_reflns_limit_l_max        32
_diffrn_reflns_theta_min          2.256
_diffrn_reflns_theta_max          25.681
_diffrn_reflns_theta_full         25.500
_diffrn_measured_fraction_theta_max   0.996
_diffrn_measured_fraction_theta_full  0.996
_diffrn_reflns_Laue_measured_fraction_max    0.996
_diffrn_reflns_Laue_measured_fraction_full   0.996
_diffrn_reflns_point_group_measured_fraction_max   0.996
_diffrn_reflns_point_group_measured_fraction_full  0.996
_reflns_number_total              5530
_reflns_number_gt                 5174
_reflns_threshold_expression      'I > 2\s(I)'
_reflns_Friedel_coverage          0.000
_reflns_Friedel_fraction_max      .
_reflns_Friedel_fraction_full     .
 
_reflns_special_details
;
 Reflections were merged by SHELXL according to the crystal
 class for the calculation of statistics and refinement.
 
 _reflns_Friedel_fraction is defined as the number of unique
 Friedel pairs measured divided by the number that would be
 possible theoretically, ignoring centric projections and
 systematic absences.
;
 
_computing_data_collection      'Bruker SMART'
_computing_cell_refinement      'Bruker SMART'
_computing_data_reduction       'Bruker SAINT'
_computing_structure_solution     ?
_computing_structure_refinement 'SHELXL-2014/7 (Sheldrick, 2014)'
_computing_molecular_graphics     ?
_computing_publication_material   ?
_refine_special_details           ?
_refine_ls_structure_factor_coef  Fsqd
_refine_ls_matrix_type            full
_refine_ls_weighting_scheme       calc
_refine_ls_weighting_details
'w=1/[\s^2^(Fo^2^)+(0.0191P)^2^+11.1281P] where P=(Fo^2^+2Fc^2^)/3'
_atom_sites_solution_primary      ?
_atom_sites_solution_secondary    ?
_atom_sites_solution_hydrogens    geom
_refine_ls_hydrogen_treatment     constr
_refine_ls_extinction_method      none
_refine_ls_extinction_coef        .
_refine_ls_number_reflns          5530
_refine_ls_number_parameters      307
_refine_ls_number_restraints      18
_refine_ls_R_factor_all           0.0267
_refine_ls_R_factor_gt            0.0246
_refine_ls_wR_factor_ref          0.0578
_refine_ls_wR_factor_gt           0.0566
_refine_ls_goodness_of_fit_ref    1.074
_refine_ls_restrained_S_all       1.077
_refine_ls_shift/su_max           0.002
_refine_ls_shift/su_mean          0.000
 
loop_
 _atom_site_label
 _atom_site_type_symbol
 _atom_site_fract_x
 _atom_site_fract_y
 _atom_site_fract_z
 _atom_site_U_iso_or_equiv
 _atom_site_adp_type
 _atom_site_occupancy
 _atom_site_site_symmetry_order  
 _atom_site_calc_flag
 _atom_site_refinement_flags_posn
 _atom_site_refinement_flags_adp
 _atom_site_refinement_flags_occupancy
 _atom_site_disorder_assembly
 _atom_site_disorder_group
I1 I 0.32140(3) 0.50481(3) 0.22639(2) 0.03652(9) Uani 1 1 d . . . . .
N1 N 0.0758(4) 0.4055(5) 0.33462(16) 0.0431(10) Uani 1 1 d . U . . .
O1 O 0.3979(3) 0.2002(3) 0.30495(11) 0.0286(7) Uani 1 1 d . . . . .
C1 C 0.4718(3) 0.3864(4) 0.21255(15) 0.0228(8) Uani 1 1 d . . . . .
I2 I 0.42394(3) 0.49055(3) 0.10600(2) 0.03673(9) Uani 1 1 d . . . . .
O2 O 0.4920(3) 0.3926(3) 0.33284(10) 0.0278(7) Uani 1 1 d . . . . .
N2 N 0.3033(3) 0.2116(4) 0.45949(13) 0.0279(8) Uani 1 1 d . . . . .
C2 C 0.5165(4) 0.3852(4) 0.16550(15) 0.0246(9) Uani 1 1 d . . . . .
I3 I 0.68488(2) 0.30235(3) 0.08674(2) 0.02936(8) Uani 1 1 d . . . . .
N3 N 0.4496(3) 0.8013(4) 0.40184(13) 0.0271(8) Uani 1 1 d . . . . .
O3 O 0.2509(3) 0.4296(3) 0.37815(12) 0.0355(7) Uani 1 1 d . . . . .
C3 C 0.6185(4) 0.3063(4) 0.15799(15) 0.0227(8) Uani 1 1 d . . . . .
I4 I 0.81879(2) 0.09955(3) 0.18592(2) 0.02649(7) Uani 1 1 d . . . . .
N4 N 0.7583(4) 0.3205(4) 0.47410(16) 0.0404(10) Uani 1 1 d . . . . .
O4 O 0.3466(3) 0.1806(3) 0.41845(11) 0.0296(7) Uani 1 1 d . . . . .
C4 C 0.6740(3) 0.2300(4) 0.19753(15) 0.0217(8) Uani 1 1 d . . . . .
I5 I 0.70569(2) 0.12487(3) 0.30574(2) 0.03165(8) Uani 1 1 d . . . . .
O5 O 0.2389(3) 0.1276(4) 0.47906(12) 0.0425(9) Uani 1 1 d . . . . .
C5 C 0.6271(3) 0.2336(4) 0.24405(14) 0.0205(8) Uani 1 1 d . . . . .
Zn06 Zn 0.42389(4) 0.37286(5) 0.39987(2) 0.02399(11) Uani 1 1 d . . . . .
O6 O 0.3293(3) 0.3272(3) 0.47836(12) 0.0351(7) Uani 1 1 d . . . . .
C6 C 0.5249(3) 0.3095(4) 0.25157(14) 0.0201(8) Uani 1 1 d . . . . .
C7 C 0.4665(3) 0.2983(4) 0.30098(15) 0.0216(8) Uani 1 1 d . . . . .
O7 O 0.4485(3) 0.5730(3) 0.42423(11) 0.0302(7) Uani 1 1 d . . . . .
O8 O 0.5802(3) 0.3041(3) 0.43256(12) 0.0343(7) Uani 1 1 d . . . . .
C8 C 0.0048(5) 0.3582(7) 0.2916(3) 0.0621(17) Uani 1 1 d . . . . .
H8A H 0.0550 0.3103 0.2688 0.093 Uiso 1 1 calc R U . . .
H8B H -0.0332 0.4385 0.2746 0.093 Uiso 1 1 calc R U . . .
H8C H -0.0556 0.2937 0.3020 0.093 Uiso 1 1 calc R U . . .
C9 C 0.0045(9) 0.4587(11) 0.3754(4) 0.110(3) Uani 1 1 d . U . . .
H9A H 0.0298 0.4119 0.4068 0.164 Uiso 1 1 calc R U . . .
H9B H -0.0792 0.4394 0.3671 0.164 Uiso 1 1 calc R U . . .
H9C H 0.0163 0.5595 0.3792 0.164 Uiso 1 1 calc R U . . .
C10 C 0.1868(4) 0.3817(5) 0.34389(18) 0.0337(10) Uani 1 1 d . U . . .
H10 H 0.2228 0.3203 0.3217 0.040 Uiso 1 1 calc R U . . .
C11 C 0.4391(4) 0.6661(4) 0.39233(16) 0.0249(9) Uani 1 1 d . . . . .
H11 H 0.4231 0.6386 0.3586 0.030 Uiso 1 1 calc R U . . .
C12 C 0.4720(5) 0.8559(5) 0.45168(18) 0.0361(11) Uani 1 1 d . . . . .
H12A H 0.4814 0.7785 0.4754 0.054 Uiso 1 1 calc R U . . .
H12B H 0.4055 0.9144 0.4601 0.054 Uiso 1 1 calc R U . . .
H12C H 0.5443 0.9120 0.4533 0.054 Uiso 1 1 calc R U . . .
C13 C 0.4416(5) 0.9039(5) 0.36160(18) 0.0442(13) Uani 1 1 d . . . . .
H13A H 0.4287 0.8559 0.3295 0.066 Uiso 1 1 calc R U . . .
H13B H 0.5151 0.9575 0.3621 0.066 Uiso 1 1 calc R U . . .
H13C H 0.3755 0.9673 0.3662 0.066 Uiso 1 1 calc R U . . .
C14 C 0.7921(5) 0.1802(6) 0.4605(2) 0.0534(15) Uani 1 1 d . . . . .
H14A H 0.7297 0.1392 0.4381 0.080 Uiso 1 1 calc R U . . .
H14B H 0.8038 0.1230 0.4906 0.080 Uiso 1 1 calc R U . . .
H14C H 0.8657 0.1838 0.4436 0.080 Uiso 1 1 calc R U . . .
C15 C 0.8399(6) 0.3969(7) 0.5078(3) 0.084(3) Uani 1 1 d . . . . .
H15A H 0.8148 0.4946 0.5093 0.126 Uiso 1 1 calc R U . . .
H15B H 0.9192 0.3924 0.4958 0.126 Uiso 1 1 calc R U . . .
H15C H 0.8409 0.3555 0.5412 0.126 Uiso 1 1 calc R U . . .
C16 C 0.6530(4) 0.3719(5) 0.45806(18) 0.0365(11) Uani 1 1 d . . . . .
H16 H 0.6339 0.4648 0.4668 0.044 Uiso 1 1 calc R U . . .
 
loop_
 _atom_site_aniso_label
 _atom_site_aniso_U_11
 _atom_site_aniso_U_22
 _atom_site_aniso_U_33
 _atom_site_aniso_U_23
 _atom_site_aniso_U_13
 _atom_site_aniso_U_12
I1 0.02869(16) 0.04795(19) 0.03394(17) 0.00093(13) 0.00946(12) 0.01828(13)
N1 0.043(2) 0.050(2) 0.034(2) -0.0062(19) -0.0097(18) 0.020(2)
O1 0.0286(15) 0.0281(16) 0.0301(16) -0.0027(13) 0.0096(13) -0.0077(13)
C1 0.0193(19) 0.028(2) 0.022(2) 0.0010(16) 0.0036(16) 0.0062(16)
I2 0.03870(17) 0.04679(19) 0.02506(15) 0.01148(13) 0.00485(12) 0.01981(14)
O2 0.0324(16) 0.0336(16) 0.0184(14) -0.0044(12) 0.0093(12) -0.0104(13)
N2 0.033(2) 0.0289(19) 0.0219(18) -0.0005(15) 0.0016(15) -0.0051(16)
C2 0.028(2) 0.027(2) 0.019(2) 0.0031(17) 0.0041(16) 0.0062(17)
I3 0.03194(15) 0.03706(16) 0.02041(14) 0.00349(11) 0.01136(11) 0.00699(12)
N3 0.0281(19) 0.0282(19) 0.0256(19) 0.0035(15) 0.0071(15) 0.0027(15)
O3 0.0404(18) 0.0309(17) 0.0339(18) -0.0042(14) -0.0068(15) 0.0027(15)
C3 0.023(2) 0.027(2) 0.019(2) 0.0030(16) 0.0092(16) 0.0023(17)
I4 0.01937(13) 0.03226(15) 0.02848(15) 0.00242(11) 0.00618(10) 0.00808(11)
N4 0.037(2) 0.035(2) 0.048(3) -0.0095(19) -0.0088(19) 0.0020(18)
O4 0.0378(17) 0.0293(16) 0.0229(15) -0.0034(13) 0.0110(13) -0.0034(14)
C4 0.0165(18) 0.025(2) 0.024(2) 0.0013(16) 0.0025(15) 0.0047(16)
I5 0.02644(15) 0.04453(18) 0.02379(15) 0.01112(12) 0.00033(11) 0.00597(12)
O5 0.051(2) 0.050(2) 0.0285(18) 0.0005(15) 0.0166(15) -0.0242(17)
C5 0.0201(19) 0.024(2) 0.0172(19) 0.0022(16) 0.0011(15) 0.0010(16)
Zn06 0.0284(3) 0.0253(2) 0.0189(2) -0.00077(19) 0.00607(19) -0.0050(2)
O6 0.048(2) 0.0260(16) 0.0302(17) -0.0078(13) -0.0015(15) -0.0032(14)
C6 0.0182(18) 0.024(2) 0.0178(19) -0.0026(16) 0.0028(15) -0.0038(16)
C7 0.0185(19) 0.027(2) 0.020(2) -0.0013(17) 0.0034(15) 0.0016(17)
O7 0.0431(18) 0.0224(15) 0.0252(16) -0.0013(13) 0.0029(13) -0.0068(13)
O8 0.0321(17) 0.0345(17) 0.0359(18) -0.0043(15) -0.0005(14) -0.0021(14)
C8 0.040(3) 0.071(4) 0.073(4) -0.019(3) -0.015(3) 0.005(3)
C9 0.109(3) 0.111(3) 0.109(3) -0.0015(10) 0.0074(10) 0.0014(10)
C10 0.028(2) 0.035(2) 0.039(3) -0.007(2) 0.009(2) -0.0047(19)
C11 0.025(2) 0.029(2) 0.021(2) -0.0003(17) 0.0044(16) -0.0030(17)
C12 0.047(3) 0.027(2) 0.034(3) -0.003(2) -0.001(2) -0.004(2)
C13 0.072(4) 0.031(3) 0.031(3) 0.009(2) 0.011(2) 0.008(2)
C14 0.052(3) 0.042(3) 0.064(4) -0.011(3) -0.007(3) 0.012(3)
C15 0.056(4) 0.070(5) 0.120(7) -0.050(5) -0.043(4) 0.020(3)
C16 0.039(3) 0.032(2) 0.039(3) -0.010(2) 0.004(2) -0.001(2)
 
_geom_special_details
;
 All esds (except the esd in the dihedral angle between two l.s. planes)
 are estimated using the full covariance matrix.  The cell esds are taken
 into account individually in the estimation of esds in distances, angles
 and torsion angles; correlations between esds in cell parameters are only
 used when they are defined by crystal symmetry.  An approximate (isotropic)
 treatment of cell esds is used for estimating esds involving l.s. planes.
;
 
loop_
 _geom_bond_atom_site_label_1
 _geom_bond_atom_site_label_2
 _geom_bond_distance
 _geom_bond_site_symmetry_2
 _geom_bond_publ_flag
I1 C1 2.107(4) . ?
N1 C10 1.290(6) . ?
N1 C8 1.437(7) . ?
N1 C9 1.498(10) . ?
O1 C7 1.231(5) . ?
C1 C6 1.385(6) . ?
C1 C2 1.396(6) . ?
I2 C2 2.110(4) . ?
O2 C7 1.265(5) . ?
O2 Zn06 2.020(3) . ?
N2 O5 1.231(5) . ?
N2 O6 1.245(5) . ?
N2 O4 1.275(4) . ?
C2 C3 1.410(6) . ?
I3 C3 2.109(4) . ?
N3 C11 1.325(5) . ?
N3 C12 1.445(6) . ?
N3 C13 1.461(6) . ?
O3 C10 1.224(6) . ?
O3 Zn06 2.083(3) . ?
C3 C4 1.404(6) . ?
I4 C4 2.107(4) . ?
N4 C16 1.338(6) . ?
N4 C15 1.450(7) . ?
N4 C14 1.452(6) . ?
O4 Zn06 2.116(3) . ?
C4 C5 1.394(5) . ?
I5 C5 2.105(4) . ?
C5 C6 1.397(5) . ?
Zn06 O8 2.035(3) . ?
Zn06 O7 2.040(3) . ?
Zn06 O6 2.474(3) . ?
C6 C7 1.530(5) . ?
O7 C11 1.237(5) . ?
O8 C16 1.224(6) . ?
C8 H8A 0.9800 . ?
C8 H8B 0.9800 . ?
C8 H8C 0.9800 . ?
C9 H9A 0.9800 . ?
C9 H9B 0.9800 . ?
C9 H9C 0.9800 . ?
C10 H10 0.9500 . ?
C11 H11 0.9500 . ?
C12 H12A 0.9800 . ?
C12 H12B 0.9800 . ?
C12 H12C 0.9800 . ?
C13 H13A 0.9800 . ?
C13 H13B 0.9800 . ?
C13 H13C 0.9800 . ?
C14 H14A 0.9800 . ?
C14 H14B 0.9800 . ?
C14 H14C 0.9800 . ?
C15 H15A 0.9800 . ?
C15 H15B 0.9800 . ?
C15 H15C 0.9800 . ?
C16 H16 0.9500 . ?
 
loop_
 _geom_angle_atom_site_label_1
 _geom_angle_atom_site_label_2
 _geom_angle_atom_site_label_3
 _geom_angle
 _geom_angle_site_symmetry_1
 _geom_angle_site_symmetry_3
 _geom_angle_publ_flag
C10 N1 C8 125.9(5) . . ?
C10 N1 C9 119.4(5) . . ?
C8 N1 C9 113.3(6) . . ?
C6 C1 C2 121.0(4) . . ?
C6 C1 I1 117.9(3) . . ?
C2 C1 I1 121.0(3) . . ?
C7 O2 Zn06 117.0(3) . . ?
O5 N2 O6 122.6(4) . . ?
O5 N2 O4 119.7(4) . . ?
O6 N2 O4 117.7(3) . . ?
C1 C2 C3 119.3(4) . . ?
C1 C2 I2 119.3(3) . . ?
C3 C2 I2 121.3(3) . . ?
C11 N3 C12 122.8(4) . . ?
C11 N3 C13 121.0(4) . . ?
C12 N3 C13 116.2(4) . . ?
C10 O3 Zn06 127.8(3) . . ?
C4 C3 C2 120.1(4) . . ?
C4 C3 I3 120.6(3) . . ?
C2 C3 I3 119.3(3) . . ?
C16 N4 C15 122.3(4) . . ?
C16 N4 C14 120.4(4) . . ?
C15 N4 C14 117.2(4) . . ?
N2 O4 Zn06 101.1(2) . . ?
C5 C4 C3 119.1(4) . . ?
C5 C4 I4 120.0(3) . . ?
C3 C4 I4 120.7(3) . . ?
C4 C5 C6 121.1(4) . . ?
C4 C5 I5 121.8(3) . . ?
C6 C5 I5 117.1(3) . . ?
O2 Zn06 O8 92.21(13) . . ?
O2 Zn06 O7 98.41(12) . . ?
O8 Zn06 O7 94.01(13) . . ?
O2 Zn06 O3 97.94(13) . . ?
O8 Zn06 O3 169.51(13) . . ?
O7 Zn06 O3 87.14(13) . . ?
O2 Zn06 O4 118.90(11) . . ?
O8 Zn06 O4 88.85(13) . . ?
O7 Zn06 O4 142.46(12) . . ?
O3 Zn06 O4 83.95(13) . . ?
O2 Zn06 O6 174.02(11) . . ?
O8 Zn06 O6 89.54(12) . . ?
O7 Zn06 O6 87.17(11) . . ?
O3 Zn06 O6 80.09(12) . . ?
O4 Zn06 O6 55.40(10) . . ?
N2 O6 Zn06 85.1(2) . . ?
C1 C6 C5 119.3(4) . . ?
C1 C6 C7 120.2(3) . . ?
C5 C6 C7 120.3(4) . . ?
O1 C7 O2 127.1(4) . . ?
O1 C7 C6 116.4(3) . . ?
O2 C7 C6 116.5(3) . . ?
C11 O7 Zn06 116.9(3) . . ?
C16 O8 Zn06 127.2(3) . . ?
N1 C8 H8A 109.5 . . ?
N1 C8 H8B 109.5 . . ?
H8A C8 H8B 109.5 . . ?
N1 C8 H8C 109.5 . . ?
H8A C8 H8C 109.5 . . ?
H8B C8 H8C 109.5 . . ?
N1 C9 H9A 109.5 . . ?
N1 C9 H9B 109.5 . . ?
H9A C9 H9B 109.5 . . ?
N1 C9 H9C 109.5 . . ?
H9A C9 H9C 109.5 . . ?
H9B C9 H9C 109.5 . . ?
O3 C10 N1 127.0(5) . . ?
O3 C10 H10 116.5 . . ?
N1 C10 H10 116.5 . . ?
O7 C11 N3 124.7(4) . . ?
O7 C11 H11 117.7 . . ?
N3 C11 H11 117.7 . . ?
N3 C12 H12A 109.5 . . ?
N3 C12 H12B 109.5 . . ?
H12A C12 H12B 109.5 . . ?
N3 C12 H12C 109.5 . . ?
H12A C12 H12C 109.5 . . ?
H12B C12 H12C 109.5 . . ?
N3 C13 H13A 109.5 . . ?
N3 C13 H13B 109.5 . . ?
H13A C13 H13B 109.5 . . ?
N3 C13 H13C 109.5 . . ?
H13A C13 H13C 109.5 . . ?
H13B C13 H13C 109.5 . . ?
N4 C14 H14A 109.5 . . ?
N4 C14 H14B 109.5 . . ?
H14A C14 H14B 109.5 . . ?
N4 C14 H14C 109.5 . . ?
H14A C14 H14C 109.5 . . ?
H14B C14 H14C 109.5 . . ?
N4 C15 H15A 109.5 . . ?
N4 C15 H15B 109.5 . . ?
H15A C15 H15B 109.5 . . ?
N4 C15 H15C 109.5 . . ?
H15A C15 H15C 109.5 . . ?
H15B C15 H15C 109.5 . . ?
O8 C16 N4 122.7(4) . . ?
O8 C16 H16 118.7 . . ?
N4 C16 H16 118.7 . . ?
 
_refine_diff_density_max    1.986
_refine_diff_density_min   -1.282
_refine_diff_density_rms    0.107

_shelx_res_file
;

    BM498_a.res created by SHELXL-2014/7


TITL BM498_a.res in P2(1)/n
REM Old TITL BM498 in P2(1)/n
REM SHELXT solution in P2(1)/n
REM R1 0.221,  Rweak 0.006,  Alpha 0.019,  Orientation as input
REM Formula found by SHELXT:  C19 N5 O3 Zn3 I3
CELL  0.71073  11.3642   9.5850  26.8975   90.000   94.011   90.000
ZERR   4.000   0.0002   0.0002   0.0006    0.000    0.001    0.000
LATT  1
SYMM 1/2-X, 1/2+Y, 1/2-Z
SFAC C H N O ZN I
UNIT 64 84 16 32 4 20
OMIT 0 0 10
OMIT 4 0 4
OMIT -6 0 4
OMIT -3 0 13
OMIT 1 0 9
OMIT 2 0 4
OMIT -1 0 1
OMIT -5   4   5
OMIT  1   0   1

SIZE 0.10 0.17 0.21
TEMP -123.150
L.S. 10
BOND $H
LIST 4
FMAP 2
PLAN 10
ISOR 0.001 0.001 C9
SIMU 0.01 0.02 N1 C9 C10
SHEL 99999 0.82
ACTA 51

WGHT    0.019100   11.128102
FVAR       0.14888
I1    6    0.321396    0.504812    0.226394    11.00000    0.02869    0.04795 =
         0.03394    0.00093    0.00946    0.01828
N1    3    0.075760    0.405506    0.334620    11.00000    0.04348    0.04967 =
         0.03442   -0.00622   -0.00968    0.01950
O1    4    0.397880    0.200217    0.304945    11.00000    0.02855    0.02811 =
         0.03012   -0.00267    0.00955   -0.00768
C1    1    0.471835    0.386395    0.212550    11.00000    0.01932    0.02753 =
         0.02200    0.00099    0.00361    0.00618
I2    6    0.423935    0.490548    0.106001    11.00000    0.03870    0.04679 =
         0.02506    0.01148    0.00485    0.01981
O2    4    0.492000    0.392557    0.332839    11.00000    0.03242    0.03356 =
         0.01844   -0.00442    0.00928   -0.01041
N2    3    0.303255    0.211636    0.459486    11.00000    0.03276    0.02892 =
         0.02188   -0.00048    0.00159   -0.00512
C2    1    0.516502    0.385162    0.165505    11.00000    0.02818    0.02688 =
         0.01904    0.00309    0.00412    0.00624
I3    6    0.684880    0.302346    0.086736    11.00000    0.03194    0.03706 =
         0.02041    0.00349    0.01136    0.00699
N3    3    0.449623    0.801295    0.401844    11.00000    0.02809    0.02818 =
         0.02564    0.00350    0.00712    0.00269
O3    4    0.250924    0.429633    0.378148    11.00000    0.04038    0.03091 =
         0.03394   -0.00417   -0.00685    0.00269
C3    1    0.618452    0.306300    0.157990    11.00000    0.02316    0.02734 =
         0.01861    0.00298    0.00921    0.00232
I4    6    0.818793    0.099547    0.185922    11.00000    0.01937    0.03226 =
         0.02848    0.00242    0.00618    0.00808
N4    3    0.758333    0.320535    0.474101    11.00000    0.03699    0.03464 =
         0.04790   -0.00946   -0.00876    0.00203
O4    4    0.346595    0.180620    0.418445    11.00000    0.03785    0.02934 =
         0.02287   -0.00336    0.01098   -0.00341
C4    1    0.673997    0.229979    0.197535    11.00000    0.01645    0.02468 =
         0.02409    0.00131    0.00248    0.00469
I5    6    0.705688    0.124866    0.305738    11.00000    0.02644    0.04453 =
         0.02379    0.01112    0.00033    0.00597
O5    4    0.238875    0.127606    0.479058    11.00000    0.05096    0.04982 =
         0.02854    0.00048    0.01664   -0.02422
C5    1    0.627094    0.233629    0.244050    11.00000    0.02006    0.02420 =
         0.01721    0.00220    0.00113    0.00103
ZN06  5    0.423895    0.372863    0.399875    11.00000    0.02843    0.02526 =
         0.01889   -0.00077    0.00607   -0.00500
O6    4    0.329322    0.327151    0.478363    11.00000    0.04833    0.02601 =
         0.03022   -0.00780   -0.00151   -0.00317
C6    1    0.524875    0.309526    0.251567    11.00000    0.01823    0.02443 =
         0.01784   -0.00263    0.00280   -0.00380
C7    1    0.466507    0.298292    0.300975    11.00000    0.01846    0.02700 =
         0.01966   -0.00128    0.00337    0.00158
O7    4    0.448528    0.573038    0.424233    11.00000    0.04314    0.02239 =
         0.02517   -0.00126    0.00285   -0.00678
O8    4    0.580159    0.304064    0.432559    11.00000    0.03208    0.03453 =
         0.03594   -0.00430   -0.00047   -0.00211
C8    1    0.004832    0.358238    0.291578    11.00000    0.03953    0.07080 =
         0.07339   -0.01890   -0.01496    0.00533
AFIX 133
H8A   2    0.055004    0.310272    0.268808    11.00000   -1.50000
H8B   2   -0.033234    0.438471    0.274559    11.00000   -1.50000
H8C   2   -0.055649    0.293733    0.302011    11.00000   -1.50000
AFIX   0
C9    1    0.004487    0.458656    0.375439    11.00000    0.10875    0.11070 =
         0.10933   -0.00153    0.00745    0.00139
AFIX 133
H9A   2    0.029818    0.411881    0.406776    11.00000   -1.50000
H9B   2   -0.079244    0.439350    0.367066    11.00000   -1.50000
H9C   2    0.016274    0.559499    0.379169    11.00000   -1.50000
AFIX   0
C10   1    0.186848    0.381663    0.343886    11.00000    0.02805    0.03525 =
         0.03870   -0.00722    0.00949   -0.00471
AFIX  43
H10   2    0.222771    0.320253    0.321725    11.00000   -1.20000
AFIX   0
C11   1    0.439086    0.666091    0.392325    11.00000    0.02523    0.02892 =
         0.02097   -0.00025    0.00444   -0.00301
AFIX  43
H11   2    0.423142    0.638626    0.358590    11.00000   -1.20000
AFIX   0
C12   1    0.471993    0.855931    0.451679    11.00000    0.04674    0.02683 =
         0.03403   -0.00315   -0.00141   -0.00422
AFIX 133
H12A  2    0.481379    0.778451    0.475398    11.00000   -1.50000
H12B  2    0.405498    0.914396    0.460106    11.00000   -1.50000
H12C  2    0.544272    0.912001    0.453332    11.00000   -1.50000
AFIX   0
C13   1    0.441564    0.903944    0.361596    11.00000    0.07216    0.03084 =
         0.03059    0.00905    0.01136    0.00806
AFIX 133
H13A  2    0.428655    0.855863    0.329523    11.00000   -1.50000
H13B  2    0.515102    0.957489    0.362095    11.00000   -1.50000
H13C  2    0.375529    0.967335    0.366172    11.00000   -1.50000
AFIX   0
C14   1    0.792140    0.180225    0.460515    11.00000    0.05179    0.04243 =
         0.06436   -0.01102   -0.00748    0.01222
AFIX 133
H14A  2    0.729720    0.139188    0.438139    11.00000   -1.50000
H14B  2    0.803807    0.122971    0.490643    11.00000   -1.50000
H14C  2    0.865703    0.183842    0.443596    11.00000   -1.50000
AFIX   0
C15   1    0.839927    0.396943    0.507820    11.00000    0.05567    0.06989 =
         0.11994   -0.05037   -0.04260    0.02006
AFIX 133
H15A  2    0.814839    0.494580    0.509339    11.00000   -1.50000
H15B  2    0.919242    0.392388    0.495763    11.00000   -1.50000
H15C  2    0.840866    0.355519    0.541156    11.00000   -1.50000
AFIX   0
C16   1    0.652964    0.371894    0.458056    11.00000    0.03876    0.03183 =
         0.03922   -0.01000    0.00404   -0.00128
AFIX  43
H16   2    0.633877    0.464793    0.466809    11.00000   -1.20000
AFIX   0
HKLF 4

REM  BM498_a.res in P2(1)/n
REM R1 =  0.0246 for    5174 Fo > 4sig(Fo)  and  0.0267 for all    5530 data
REM    307 parameters refined using     18 restraints

END

WGHT      0.0174     11.2169

REM Highest difference peak  1.986,  deepest hole -1.282,  1-sigma level  0.107
Q1    1   0.4829  0.5467  0.1209  11.00000  0.05    1.99
Q2    1   0.2985  0.4238  0.2273  11.00000  0.05    1.47
Q3    1   0.0604  0.5626  0.3443  11.00000  0.05    1.35
Q4    1   0.4631  0.4459  0.4115  11.00000  0.05    1.14
Q5    1  -0.0040  0.4157  0.3821  11.00000  0.05    0.70
Q6    1   0.7175  0.0514  0.3150  11.00000  0.05    0.57
Q7    1   0.8111  0.0919  0.2145  11.00000  0.05    0.54
Q8    1   0.7223  0.3616  0.1029  11.00000  0.05    0.52
Q9    1   0.4258  0.1949  0.4171  11.00000  0.05    0.46
Q10   1   0.6066  0.5172  0.5193  11.00000  0.05    0.46
;
_shelx_res_checksum   75606

_shelx_hkl_file
;
  -1   0   0    0.70    0.20
  -2   0   0 1449.85   36.90
   2   0   0 1492.15   39.70
  -2   0   0 1481.15   39.70
   2   0   0 1478.45   36.90
   3   0   0    0.40    0.50
   3   0   0    0.70    0.40
  -3   0   0    0.30    0.50
  -3   0   0    1.20    0.50
   4   0   0    1.90    0.90
  -4   0   0    2.70    1.10
  -4   0   0    0.80    0.50
   4   0   0    0.40    0.40
  -5   0   0    0.80    0.60
  -5   0   0    0.20    0.70
   5   0   0    0.90    0.70
   5   0   0    0.20    0.40
   6   0   0  647.94   20.40
  -6   0   0  720.83   21.00
  -6   0   0  696.43   18.60
   6   0   0  658.93   18.50
   6   0   0  710.13   20.80
   7   0   0    1.60    1.10
  -7   0   0   -1.40    0.60
   7   0   0    0.30    0.60
  -7   0   0    0.50    0.70
   7   0   0    0.20    0.90
   9   0   0    1.70    1.00
  -9   0   0    2.90    1.70
   9   0   0    0.10    1.20
  -9   0   0    0.40    0.80
 -10   0   0  604.24   18.60
  10   0   0  607.64   21.90
  10   0   0  599.44   20.20
 -10   0   0  640.84   22.60
  11   0   0   -1.00    1.00
 -11   0   0    2.70    2.10
 -11   0   0   -0.70    0.80
  11   0   0    0.10    1.10
 -12   0   0  188.28    8.80
 -12   0   0  211.68   12.40
  12   0   0  202.18   12.00
 -13   0   0   -0.30    1.80
  13   0   0    0.70    1.80
 -13   0   0    0.30    1.00
 -14   0   0   64.49    5.20
 -14   0   0   72.09    9.20
 -15   0   0    0.90    1.30
 -15   0   0   -0.50    1.80
 -16   0   0  116.59    7.30
 -16   0   0  143.99   11.80
   0  -1   0    0.40    0.30
   0   1   0    0.80    0.30
   0   1   0   -0.10    0.10
   1  -1   0 3114.19   74.19
  -1  -1   0 3070.49   75.29
   1  -1   0 3104.09   73.69
  -1  -1   0 3078.79   71.39
  -1   1   0 3082.19   74.19
  -1   1   0 3070.69   73.59
   1   1   0 3062.59   71.29
   1   1   0 3039.80   75.19
   2  -1   0  194.78    5.90
   2  -1   0  190.58    5.90
  -2  -1   0  189.98    6.30
   2   1   0  191.38    4.70
   2   1   0  181.88    6.30
  -2   1   0  184.18    6.20
  -2   1   0  181.78    5.80
  -2   1   0  188.68    6.20
   3  -1   0  905.41   28.90
  -3  -1   0  920.51   23.50
  -3  -1   0  923.41   30.40
   3   1   0  895.21   23.40
  -3   1   0  932.51   27.40
  -3   1   0  936.31   28.70
  -3   1   0  907.31   28.60
   3   1   0  815.82   29.50
   4  -1   0  395.46   11.70
  -4  -1   0  396.16   12.80
   4  -1   0  404.06   12.60
  -4   1   0  412.16   11.70
   4   1   0  400.46   10.50
  -4   1   0  413.66   12.40
   4   1   0  383.56   12.60
  -4   1   0  401.36   12.20
   5  -1   0   22.20    2.40
   5  -1   0   34.60    3.90
  -5  -1   0   23.40    1.60
  -5  -1   0   20.60    2.90
  -5   1   0   24.50    2.90
  -5   1   0   27.70    2.30
   5   1   0   30.20    3.60
   5   1   0   26.30    1.70
  -5   1   0   20.20    2.60
  -6  -1   0  352.16   10.30
   6  -1   0  375.66   13.10
   6  -1   0  350.16   11.50
  -6  -1   0  374.06   13.30
  -6   1   0  353.96   11.50
  -6   1   0  366.26   12.70
   6   1   0  345.07   12.90
  -6   1   0  367.46   12.80
   6   1   0  361.06   11.00
  -7  -1   0  179.58    8.80
   7  -1   0  174.18    7.30
  -7  -1   0  170.48    6.20
   7  -1   0  171.58    8.50
  -7   1   0  168.58    8.20
  -7   1   0  156.08    6.90
  -7   1   0  172.58    8.20
   7   1   0  170.78    6.30
   7   1   0  159.88    8.40
   8  -1   0   11.50    2.20
   8  -1   0   12.60    3.00
  -8  -1   0   12.80    1.90
  -8  -1   0   11.90    3.50
  -8   1   0   14.10    2.90
   8   1   0   10.60    2.80
  -8   1   0   12.00    2.30
  -8   1   0   11.60    2.60
   8   1   0   13.50    2.00
  -9  -1   0 1066.39   31.40
   9  -1   0  964.00   27.80
   9  -1   0 1001.90   30.60
  -9  -1   0  987.80   26.20
  -9   1   0  959.70   27.60
  -9   1   0 1029.20   30.60
   9   1   0  936.01   26.30
  10  -1   0   44.20    4.90
 -10  -1   0   36.70    5.60
  10  -1   0   36.80    5.10
 -10  -1   0   37.30    3.00
  10   1   0   45.70    3.40
  10   1   0   28.80    4.40
 -10   1   0   31.40    5.10
  11  -1   0  770.82   26.50
 -11  -1   0  703.33   20.90
 -11  -1   0  738.13   26.30
 -11   1   0  702.43   22.40
 -11   1   0  703.33   25.70
  11   1   0  743.13   21.50
  11   1   0  766.82   26.00
  12  -1   0    7.60    2.80
 -12  -1   0   12.80    2.40
 -12  -1   0   15.10    4.20
  12   1   0    8.80    2.40
 -12   1   0   14.40    3.20
 -12   1   0   12.10    3.70
  12   1   0   17.20    4.50
 -13  -1   0    1.40    1.10
 -13  -1   0    0.90    2.10
  13  -1   0   -1.00    0.90
  13   1   0    1.40    1.00
  13   1   0    1.00    1.30
 -13   1   0   -1.90    1.40
 -13   1   0    0.30    1.30
 -14  -1   0   44.60    7.10
 -14  -1   0   40.80    4.40
 -14   1   0   37.20    5.00
 -14   1   0   31.10    6.10
 -15  -1   0   11.20    2.30
 -15  -1   0    6.50    3.20
 -15   1   0   11.80    4.10
 -15   1   0   11.90    3.20
 -16  -1   0    4.60    3.00
 -16   1   0    2.40    2.60
 -16   1   0    4.00    2.10
   0   2   0  312.87    9.60
   0   2   0  312.67    8.80
   1  -2   0 1440.46   38.80
   1  -2   0 1473.45   38.20
  -1  -2   0 1407.56   36.00
  -1  -2   0 1436.36   39.80
   1   2   0 1396.46   39.90
  -1   2   0 1460.15   39.00
  -1   2   0 1469.65   38.20
   1   2   0 1388.16   36.00
   2  -2   0   97.89    4.60
  -2  -2   0   96.89    4.40
   2  -2   0   99.99    4.30
   2  -2   0   97.09    4.10
  -2   2   0   99.59    3.80
   2   2   0  103.79    2.90
   2   2   0   97.99    2.80
  -2   2   0   98.39    4.50
   2   2   0  104.29    4.50
  -2   2   0   94.59    4.10
   3  -2   0   20.10    2.30
   3  -2   0   23.60    2.40
   3  -2   0   22.10    3.30
  -3  -2   0   16.90    2.30
   3   2   0   20.80    2.70
   3   2   0   18.70    0.80
  -3   2   0   15.70    2.00
   3   2   0   18.40    0.80
  -3   2   0   17.10    1.90
   4  -2   0   21.70    3.00
  -4  -2   0   19.90    2.90
  -4  -2   0   16.80    0.90
   4  -2   0   18.30    2.30
   4  -2   0   19.30    2.40
   4   2   0   20.20    1.00
  -4   2   0   12.70    1.90
   4   2   0   17.10    2.60
  -4   2   0   15.80    2.00
  -4   2   0   13.70    1.90
  -5  -2   0  104.09    5.90
  -5  -2   0  113.69    3.60
   5  -2   0  103.09    5.90
   5  -2   0  111.79    5.40
  -5   2   0  109.89    5.40
   5   2   0  111.99    3.60
   5   2   0  116.89    6.20
  -5   2   0  103.39    5.70
  -5   2   0  116.59    5.40
  -5   2   0  109.89    5.50
   6  -2   0   46.50    3.60
   6  -2   0   35.40    4.30
  -6  -2   0   51.39    4.40
   6   2   0   54.09    4.40
   6   2   0   45.50    2.20
  -6   2   0   52.29    4.00
  -6   2   0   54.39    3.80
  -6   2   0   51.79    3.90
  -7  -2   0  183.68    9.30
   7  -2   0  187.08    8.10
  -7  -2   0  183.58    6.00
  -7   2   0  185.48    8.70
  -7   2   0  192.08    8.20
   7   2   0  181.58    9.20
   7   2   0  188.98    6.10
  -7   2   0  180.88    8.40
   8  -2   0  246.58   10.10
  -8  -2   0  238.28   11.50
   8  -2   0  230.38   11.30
  -8  -2   0  242.48    7.70
  -8   2   0  234.38    9.80
  -8   2   0  243.18   10.60
  -8   2   0  246.18   10.90
   8   2   0  237.48    7.70
  -9  -2   0  531.95   14.80
  -9  -2   0  534.25   19.90
   9  -2   0  509.05   17.50
   9  -2   0  535.15   20.00
  -9   2   0  539.65   17.70
   9   2   0  511.25   14.90
  -9   2   0  546.85   19.20
 -10  -2   0   -1.90    1.00
  10  -2   0    1.80    1.40
 -10  -2   0    1.10    0.80
 -10   2   0    0.90    1.30
  10   2   0    0.50    0.80
 -10   2   0   -0.20    1.30
  11  -2   0   50.09    7.30
 -11  -2   0   31.10    5.50
 -11  -2   0   41.80    3.00
 -11   2   0   41.20    6.00
 -11   2   0   44.80    5.30
  11   2   0   36.20    2.90
  12  -2   0  109.99    9.00
 -12  -2   0  118.19    5.50
 -12  -2   0  120.69    9.50
  12   2   0  123.29    5.80
  12   2   0  132.19    9.40
 -12   2   0  135.69    8.00
 -12   2   0  112.49    8.90
 -13  -2   0    2.30    1.10
  13  -2   0    0.00    1.50
 -13  -2   0    3.60    2.90
 -13   2   0    5.60    2.30
  13   2   0    3.50    1.40
  13   2   0    5.20    2.60
 -13   2   0    2.60    2.30
 -14  -2   0    1.00    2.10
 -14  -2   0    1.30    0.90
 -14   2   0   -2.30    0.90
 -14   2   0    1.40    2.20
 -15  -2   0    0.40    2.00
 -15   2   0    4.90    3.00
 -16   2   0    2.80    2.50
 -16   2   0    1.70    1.70
   0  -3   0    1.20    0.60
   0  -3   0    0.40    0.50
   0  -3   0    0.10    0.60
   0   3   0    0.10    0.40
   0   3   0    0.30    0.60
   1  -3   0  133.59    5.20
   1  -3   0  136.99    6.10
  -1  -3   0  119.79    5.10
   1  -3   0  133.79    4.90
  -1  -3   0  134.39    4.50
   1   3   0  128.39    5.30
   1   3   0  123.79    4.80
  -1   3   0  131.09    4.90
   1   3   0  126.49    6.70
  -1   3   0  132.79    5.10
  -2  -3   0  598.14   17.10
   2  -3   0  597.34   16.80
   2   3   0  598.34   17.20
  -2   3   0  614.54   16.90
   3  -3   0  105.89    5.70
  -3  -3   0  117.09    5.70
   3  -3   0  118.39    5.30
   3  -3   0  115.99    4.90
   3   3   0  111.69    3.40
  -3   3   0  105.89    4.60
   3   3   0  106.59    5.50
  -3   3   0  109.69    5.20
   3   3   0  113.29    3.30
  -3   3   0  110.89    5.70
   4  -3   0   54.99    3.50
   4  -3   0   56.79    4.20
   4  -3   0   54.59    3.70
  -4  -3   0   57.89    4.20
  -4   3   0   63.59    3.60
   4   3   0   58.99    1.80
   4   3   0   56.19    4.10
  -4   3   0   56.99    4.10
  -4   3   0   60.39    3.80
   4   3   0   61.89    1.90
   5  -3   0    1.00    0.90
  -5  -3   0    0.30    1.00
   5  -3   0    0.50    0.80
   5  -3   0    1.20    0.90
  -5   3   0   -0.30    0.60
   5   3   0    0.60    0.80
  -5   3   0    2.80    1.20
   5   3   0    1.60    0.30
  -5   3   0   -0.10    0.60
   5   3   0    0.80    0.20
   6  -3   0    0.20    1.00
   6  -3   0    0.60    1.00
  -6  -3   0    1.20    1.30
   6   3   0    1.10    0.30
   6   3   0    0.20    0.90
  -6   3   0    2.00    1.30
  -6   3   0    1.90    1.20
   6   3   0    2.30    0.40
  -6   3   0    1.00    0.90
  -6   3   0   -0.70    0.60
   7  -3   0  200.38    9.00
  -7  -3   0  206.28    5.70
   7  -3   0  209.38   10.30
  -7  -3   0  214.08   10.40
  -7   3   0  209.98    9.40
  -7   3   0  217.88    9.30
  -7   3   0  186.48   10.70
   7   3   0  207.58    5.70
  -7   3   0  204.18    9.00
   7   3   0  210.28   10.30
   8  -3   0   48.40    6.50
  -8  -3   0   28.50    1.60
  -8  -3   0   25.80    4.30
  -8   3   0   29.40    3.80
   8   3   0   27.50    1.60
  -8   3   0   35.00    4.40
  -8   3   0   41.10    5.10
  -9  -3   0    5.30    2.80
  -9  -3   0    4.30    1.10
   9  -3   0    4.10    2.40
  -9   3   0   -1.60    1.00
  -9   3   0    0.70    1.30
   9   3   0    2.90    0.80
 -10  -3   0  414.66   11.70
 -10  -3   0  443.66   18.70
  10  -3   0  431.56   18.50
 -10   3   0  447.26   17.40
 -10   3   0  452.05   16.40
  10   3   0  432.06   11.80
  11  -3   0   -1.30    0.70
 -11  -3   0    1.20    0.60
 -11  -3   0    0.00    1.50
 -11   3   0    2.20    1.70
 -11   3   0   -2.50    0.90
  12  -3   0  120.09    9.70
 -12  -3   0  107.99    4.30
 -12  -3   0  152.98   18.90
 -12   3   0  100.29    8.40
 -12   3   0  123.79    8.00
 -13  -3   0    7.50    1.20
 -13  -3   0    5.00    2.80
  13  -3   0    7.50    3.20
 -13   3   0    3.20    2.50
 -13   3   0    3.90    2.40
  13   3   0    7.20    1.80
 -14  -3   0   -2.30    1.20
 -14   3   0    0.30    1.60
 -14   3   0    4.00    2.70
 -15  -3   0    7.80    3.50
 -15   3   0    7.50    3.00
 -15   3   0    4.80    3.10
   0  -4   0  542.75   15.40
   0  -4   0  563.64   17.50
   0  -4   0  528.65   15.00
   0   4   0  523.15   16.90
   0   4   0  519.65   15.00
   0   4   0  526.75   15.40
  -1  -4   0 1560.44   43.00
   1  -4   0 1560.34   45.40
  -1  -4   0 1508.65   46.90
   1  -4   0 1513.45   45.50
  -1   4   0 1548.25   45.60
   1   4   0 1525.05   47.50
  -1   4   0 1570.54   45.80
   1   4   0 1529.45   42.80
   2  -4   0  148.59    6.40
   2  -4   0  147.59    5.90
  -2  -4   0  144.99    5.10
  -2  -4   0  146.29    6.60
   2  -4   0  132.69    7.00
   2   4   0  150.38    6.70
  -2   4   0  146.49    6.30
  -2   4   0  143.79    5.80
  -2   4   0  157.08    7.40
   2   4   0  148.29    5.10
  -3  -4   0   43.30    3.50
  -3  -4   0   39.00    2.00
   3  -4   0   36.60    4.30
   3  -4   0   36.20    3.10
   3  -4   0   36.10    2.70
  -3   4   0   48.50    5.10
   3   4   0   42.30    2.10
   3   4   0   38.10    3.30
  -3   4   0   41.70    3.30
  -3   4   0   34.90    2.70
  -4  -4   0  405.86   14.00
   4  -4   0  391.06   14.40
   4  -4   0  380.56   12.50
   4  -4   0  380.56   13.10
  -4   4   0  386.66   13.10
   4   4   0  389.76    9.80
  -4   4   0  384.16   12.20
   4   4   0  377.26   13.80
   4   4   0  373.96    9.80
  -5  -4   0   58.69    4.80
   5  -4   0   96.49    7.50
   5  -4   0   58.19    4.00
   5  -4   0   54.29    4.30
   5   4   0   51.19    4.50
  -5   4   0   69.29    5.10
  -5   4   0   62.59    4.50
  -5   4   0   57.09    3.90
   6  -4   0    8.90    2.10
   6  -4   0    9.30    2.30
   6  -4   0    9.30    2.60
   6   4   0    5.40    2.10
  -6   4   0    8.70    2.00
  -6   4   0   11.50    2.70
  -6   4   0   10.80    2.40
  -7  -4   0  106.79    7.40
   7  -4   0  124.89    8.00
  -7   4   0  130.59    7.00
  -7   4   0  111.59    6.30
  -7   4   0  109.19    7.30
  -7   4   0  116.19    6.90
  -8  -4   0    2.30    1.90
   8  -4   0    1.50    1.60
  -8   4   0    0.00    0.90
  -8   4   0   -1.50    0.80
  -8   4   0    1.20    1.60
  -8   4   0    1.40    1.40
   9  -4   0  430.46   18.20
  -9  -4   0  388.46   17.30
  -9   4   0  430.06   16.10
  -9   4   0  416.46   16.10
 -10  -4   0   79.19    8.70
  10  -4   0   81.29    9.30
 -10   4   0   65.99    5.80
 -10   4   0   63.49    7.00
 -11  -4   0   18.80    4.70
  11  -4   0   15.50    4.10
 -11   4   0   36.50    5.50
 -11   4   0   24.10    4.40
  12  -4   0   73.49    9.90
 -12  -4   0   51.79    7.60
 -12   4   0   65.19    7.50
 -12   4   0   73.49    8.40
 -13  -4   0   65.99    9.00
 -13   4   0   58.49    7.10
 -13   4   0   65.09    8.00
 -14  -4   0   16.60    4.90
 -14   4   0   18.90    4.10
 -14   4   0   21.20    5.00
 -15  -4   0   32.50    7.20
 -15   4   0   37.30    5.90
 -15   4   0   37.20    6.40
   0  -5   0    0.30    0.90
   0  -5   0    2.30    1.10
   0   5   0    2.00    1.00
   0   5   0    0.80    1.10
   0   5   0   -1.40    0.70
   1  -5   0  303.57   12.50
   1  -5   0  305.07   10.40
  -1  -5   0  315.77   11.00
  -1  -5   0  292.67    9.80
   1  -5   0  303.17   10.60
  -1   5   0  320.57   10.80
   1   5   0  305.77   11.10
  -1   5   0  316.07   10.60
   1   5   0  301.47   12.40
  -1   5   0  301.07   12.10
   1   5   0  310.27   10.00
  -2  -5   0    1.30    0.70
   2  -5   0   -0.40    0.90
  -2  -5   0    1.80    1.00
   2  -5   0    0.30    0.70
   2  -5   0    0.40    0.70
  -2   5   0    1.40    0.80
   2   5   0    1.40    1.00
  -2   5   0    0.00    0.70
  -2   5   0    0.20    0.90
   2   5   0    0.20    0.50
   2   5   0    0.20    0.90
   3  -5   0  499.95   16.40
   3  -5   0  516.45   18.20
  -3  -5   0  514.35   16.90
   3  -5   0  525.35   15.60
  -3   5   0  525.35   16.60
   3   5   0  517.95   17.10
  -3   5   0  509.95   15.50
   3   5   0  516.85   14.00
  -3   5   0  511.15   17.80
   4  -5   0  124.89    7.60
   4  -5   0  116.39    5.90
   4  -5   0  112.09    6.40
  -4  -5   0  118.99    6.90
   4   5   0  119.39    4.10
   4   5   0  112.09    6.80
  -4   5   0  115.89    5.70
  -4   5   0  109.59    6.90
  -4   5   0  121.09    6.60
   5  -5   0  198.58   10.30
   5  -5   0  197.38    8.40
   5  -5   0  191.98    9.00
   5   5   0  183.08    9.50
  -5   5   0  183.38    9.60
  -5   5   0  191.38    8.10
   5   5   0  198.58    5.30
  -5   5   0  202.78   10.40
   5   5   0  190.98    5.20
   6  -5   0  141.19    8.80
  -6  -5   0  128.39    8.20
   6  -5   0  151.18    7.40
  -6   5   0  142.69    8.40
  -6   5   0  139.09    6.90
  -6   5   0  137.99    7.70
   7  -5   0  349.37   15.60
   7  -5   0  366.66   13.60
  -7  -5   0  349.27   15.10
  -7   5   0  357.16   15.00
  -7   5   0  331.37   14.00
  -7   5   0  335.17   13.80
   8  -5   0  166.18   10.70
  -8  -5   0  182.08   10.80
  -8   5   0  203.88    9.90
  -8   5   0  201.48   10.10
  -8   5   0  194.08   10.80
  -8   5   0  192.78    9.30
   9  -5   0   30.40    5.10
  -9  -5   0   22.80    4.70
  -9   5   0   30.50    4.70
  -9   5   0   13.70    3.20
  -9   5   0   26.10    4.50
  10  -5   0   75.19    9.60
 -10  -5   0   78.29    8.90
 -10   5   0   46.60    6.10
 -10   5   0   66.69    7.20
  11  -5   0   50.59    8.10
 -11  -5   0   45.90    7.80
 -11   5   0   30.30    5.20
 -11   5   0   40.60    5.80
 -12  -5   0   16.90    4.60
  12  -5   0   27.30    6.50
 -12   5   0   22.80    4.60
 -12   5   0   17.70    4.10
 -13  -5   0    8.40    3.90
 -13   5   0    7.90    3.30
 -13   5   0    7.10    3.00
 -14  -5   0   18.40    5.00
 -14   5   0   31.70    5.40
 -14   5   0   20.20    4.60
 -15  -5   0   26.20    6.20
 -15   5   0   26.70    5.60
 -15   5   0   26.50    5.20
   0  -6   0  515.95   16.30
   0  -6   0  500.35   15.80
   0   6   0  518.65   15.90
   0   6   0  502.55   16.40
   0   6   0  519.45   18.60
   1  -6   0 1616.94   42.30
   1  -6   0 1676.73   46.00
   1   6   0 1605.34   42.90
   2  -6   0    6.00    2.10
  -2  -6   0    1.90    1.00
  -2  -6   0    3.60    1.70
   2  -6   0    6.10    1.90
   2  -6   0    4.20    1.70
  -2   6   0    8.80    2.80
   2   6   0    2.10    1.50
   2   6   0    4.50    1.40
  -2   6   0    2.10    1.20
  -2   6   0    7.30    2.20
   3  -6   0   34.70    4.00
   3  -6   0   33.10    4.00
   3  -6   0   33.40    4.90
  -3  -6   0   30.60    4.20
  -3  -6   0   28.90    2.30
  -3   6   0   29.70    3.50
  -3   6   0   25.90    3.70
   3   6   0   35.60    2.60
   3   6   0   27.80    4.80
  -3   6   0   38.80    5.20
   3   6   0   33.20    4.70
  -4  -6   0   22.10    2.30
  -4  -6   0   17.60    3.30
   4  -6   0   18.70    2.90
   4  -6   0   21.00    5.20
   4   6   0   24.50    4.10
  -4   6   0   25.80    4.00
  -4   6   0   26.90    3.50
  -4   6   0   20.90    3.90
   4   6   0   21.90    2.20
   5  -6   0   46.30    4.90
  -5  -6   0   49.30    6.10
   5  -6   0   46.30    6.50
  -5   6   0   59.49    6.40
   5   6   0   41.30    2.60
  -5   6   0   41.90    5.40
   5   6   0   44.70    2.10
  -5   6   0   47.60    3.80
  -6  -6   0   33.10    4.90
   6  -6   0   40.70    6.20
   6  -6   0   33.80    4.10
  -6   6   0   33.10    4.70
  -6   6   0   43.60    6.20
  -7  -6   0  607.64   22.10
   7  -6   0  596.64   19.80
   7  -6   0  578.34   22.80
  -7   6   0  594.84   20.80
  -7   6   0  579.84   19.10
  -7   6   0  591.54   21.90
   8  -6   0  108.69    8.90
  -8  -6   0   92.79    7.90
   8  -6   0  108.99    7.10
  -8   6   0  115.59    7.80
  -8   6   0  108.19    8.20
  -8   6   0  105.29    7.00
  -9  -6   0  365.86   17.10
   9  -6   0  338.87   17.20
  -9   6   0  330.07   16.00
  -9   6   0  361.36   14.80
  -9   6   0  356.36   15.40
 -10  -6   0   -2.40    1.40
  10  -6   0    0.30    2.00
 -10   6   0    0.20    1.50
 -10   6   0    0.50    1.50
 -10   6   0   -0.20    1.20
 -11  -6   0    0.80    2.00
  11  -6   0   10.60    4.20
 -11   6   0    4.00    2.60
 -11   6   0   14.30    3.90
 -12  -6   0   18.30    4.90
 -12   6   0   22.50    4.60
 -12   6   0   17.00    4.20
 -13  -6   0    9.40    4.00
 -13   6   0   14.50    4.20
 -13   6   0    5.10    2.70
 -14   6   0   14.20    4.00
 -14   6   0   13.90    4.20
   0  -7   0   -0.40    0.90
   0   7   0    0.50    1.00
   0   7   0    0.20    0.90
   0   7   0   -0.10    1.20
  -1  -7   0  155.78    7.20
   1  -7   0  154.38   10.50
  -1  -7   0  158.58    8.00
   1  -7   0  168.88    7.90
   1  -7   0  161.58    7.90
  -1   7   0  159.28    9.60
  -1   7   0  174.18    9.10
   1   7   0  166.58    9.80
   1   7   0  165.08    7.40
   1   7   0  160.18    8.30
  -1   7   0  153.48    7.80
   2  -7   0  102.49    6.50
   2  -7   0  105.09    6.10
   2  -7   0   69.69   10.50
  -2  -7   0   96.69    5.30
  -2   7   0  120.49    6.80
   2   7   0   93.59    6.50
   2   7   0  101.59    5.40
  -2   7   0  106.39    7.70
  -2   7   0  107.39    6.20
   2   7   0   98.49    7.60
  -3  -7   0   39.70    4.90
  -3  -7   0   42.30    3.10
   3  -7   0   41.40    6.00
   3  -7   0   46.30    4.00
  -3   7   0   42.30    4.90
   3   7   0   54.59    6.90
  -3   7   0   54.89    6.80
   3   7   0   46.50    3.30
  -3   7   0   38.60    4.40
  -4  -7   0   68.99    5.80
   4  -7   0   84.59    5.40
   4  -7   0   90.89    9.60
  -4  -7   0   73.49    3.80
  -4   7   0   78.69    6.00
   4   7   0   78.59    4.00
  -4   7   0   70.59    6.40
   4   7   0   58.69    6.70
  -5  -7   0  420.76   16.80
   5  -7   0  422.06   14.90
   5  -7   0  407.36   18.20
   5   7   0  422.56   11.70
  -5   7   0  413.16   14.70
  -5   7   0  402.66   17.30
  -5   7   0  427.66   16.20
  -6  -7   0   25.50    4.80
   6  -7   0   14.60    4.30
   6  -7   0   28.50    4.20
  -6   7   0   23.50    3.50
   6   7   0   19.50    1.00
  -6   7   0   17.20    3.60
  -6   7   0   15.90    3.50
   6   7   0   18.60    0.90
  -7  -7   0   12.50    3.50
   7  -7   0   17.20    4.90
   7  -7   0   12.60    2.90
  -7   7   0   13.50    2.80
  -7   7   0   13.00    3.40
  -7   7   0   18.40    4.40
   8  -7   0  157.58    8.80
   8  -7   0  124.89   10.20
  -8  -7   0  158.78   10.50
  -8   7   0  140.09    9.90
  -8   7   0  146.09    9.40
   9  -7   0   79.89    9.10
  -9  -7   0  103.19    8.90
  -9   7   0   92.69    6.90
  -9   7   0   91.39    8.20
  -9   7   0   89.69    7.50
  10  -7   0  142.59   11.60
 -10  -7   0  161.98   11.40
 -10   7   0  158.78   10.30
 -10   7   0  157.88    9.60
 -10   7   0  120.39    9.90
 -11  -7   0    8.30    3.70
 -11   7   0    8.50    3.20
 -11   7   0    8.80    3.10
 -12  -7   0   42.30    7.70
 -12   7   0   22.80    4.80
 -12   7   0   34.90    5.70
 -13  -7   0   94.89   11.30
 -13   7   0   81.49    9.30
 -13   7   0   72.29    9.60
   0  -8   0  572.34   18.40
   0  -8   0  548.65   18.60
   0   8   0  536.15   21.30
   0   8   0  553.74   19.20
  -1  -8   0   21.70    3.70
  -1  -8   0   26.80    3.70
   1   8   0   22.40    4.80
   1   8   0   23.20    3.50
  -1   8   0   30.50    4.30
  -1   8   0   21.40    4.40
  -1   8   0   22.40    3.70
   2  -8   0    0.30    1.20
   2  -8   0   -1.10    1.10
  -2  -8   0   -0.70    0.90
  -2  -8   0    2.60    1.70
  -2   8   0   -0.10    1.40
  -2   8   0    2.20    1.70
   2   8   0   -1.50    0.90
  -2   8   0    0.20    1.30
   2   8   0   -0.30    1.70
  -3  -8   0   25.10    3.10
  -3  -8   0   25.50    4.50
   3  -8   0   28.60    5.70
   3  -8   0   20.10    3.50
   3   8   0   24.70    3.30
  -3   8   0   27.20    4.40
  -3   8   0   23.00    3.50
  -3   8   0   36.70    5.90
   3   8   0   33.50    6.20
  -4  -8   0    3.90    1.30
   4  -8   0    4.80    2.20
  -4  -8   0    2.10    1.90
   4  -8   0    3.50    2.50
   4   8   0    5.30    1.40
  -4   8   0    1.80    1.50
   4   8   0    1.30    1.70
  -4   8   0    6.60    2.50
  -4   8   0    1.90    2.00
   5  -8   0   46.40    7.50
  -5  -8   0   55.29    7.00
   5  -8   0   48.40    5.40
  -5   8   0   40.00    4.90
  -5   8   0   34.60    5.20
   5   8   0   40.30    2.70
   5   8   0   28.50    5.30
  -5   8   0   32.10    5.00
   5   8   0   42.10    2.70
   6  -8   0   11.10    2.60
  -6  -8   0    3.10    2.30
   6  -8   0   13.10    4.10
   6   8   0    3.70    2.30
  -6   8   0   10.70    3.30
   6   8   0   10.30    1.10
  -6   8   0    8.00    3.00
   6   8   0   10.50    1.40
   7  -8   0   85.39    9.60
  -7  -8   0  114.49    8.80
   7  -8   0   98.59    6.90
  -7   8   0   92.69    8.30
  -7   8   0  106.99    8.00
   8  -8   0  177.38    9.90
  -8  -8   0  173.08   13.00
   8  -8   0  209.18   18.10
  -8   8   0  169.08   11.60
  -9  -8   0    0.00    2.10
  -9   8   0    9.30    3.60
  -9   8   0    0.50    1.90
  -9   8   0    0.90    1.70
 -10  -8   0   13.00    4.30
 -10   8   0    7.40    3.30
 -10   8   0   11.10    3.30
 -10   8   0   15.00    4.00
 -11  -8   0    8.70    3.70
 -11   8   0    7.40    3.00
 -11   8   0    8.20    2.80
 -12  -8   0   37.60    7.60
 -12   8   0   37.70    6.10
 -12   8   0   45.10    7.30
 -13  -8   0    6.00    4.00
 -13   8   0    9.30    3.30
 -13   8   0   10.00    4.00
   0  -9   0    0.30    1.40
   0   9   0    1.20    2.00
   0   9   0   -0.30    1.20
   1  -9   0  180.08    9.50
  -1  -9   0  191.08   10.00
  -1   9   0  187.78    9.70
  -1   9   0  192.68   12.00
   1   9   0  198.98    9.30
   1   9   0  187.18   13.50
  -2  -9   0   11.50    2.50
  -2  -9   0   11.10    2.90
   2  -9   0    5.00    2.20
   2   9   0    6.60    3.00
  -2   9   0    7.70    2.50
   2   9   0    6.80    2.10
  -2   9   0    8.40    3.20
   3  -9   0   33.20    4.60
  -3  -9   0   28.10    4.70
  -3   9   0   41.30    6.60
   3   9   0   32.50    3.90
   3   9   0   49.00    7.80
  -3   9   0   23.50    4.40
  -4  -9   0  217.28   11.70
   4  -9   0  209.98   10.30
  -4  -9   0  214.08    8.50
   4   9   0  208.88   13.20
   4   9   0  213.98    8.60
  -4   9   0  214.98   12.90
  -4   9   0  218.28   11.40
   5  -9   0    0.90    1.50
  -5  -9   0    1.00    2.00
   5   9   0    1.50    1.00
  -5   9   0    3.50    2.20
   5   9   0    1.30    2.10
   5   9   0    2.00    1.00
  -5   9   0    0.70    1.60
  -6  -9   0    5.30    2.50
   6  -9   0    2.40    1.80
  -6   9   0    2.80    2.40
  -6   9   0    2.40    2.10
   6   9   0    3.20    2.40
   6   9   0    4.80    1.00
   7  -9   0    2.40    1.50
  -7  -9   0    2.00    3.00
  -7   9   0    0.00    1.50
  -7   9   0    1.20    2.30
   7   9   0   -1.00    1.40
  -8  -9   0   30.50    6.00
   8  -9   0   27.30    4.50
  -8   9   0   19.90    4.50
  -8   9   0   22.20    4.90
   8   9   0   20.00    5.40
   9  -9   0  134.19    9.00
  -9  -9   0  138.89   10.90
  -9   9   0   96.49   15.20
  -9   9   0  138.79    9.10
  -9   9   0  145.79   10.30
 -10  -9   0   34.80    6.90
 -10   9   0   27.50    5.60
 -10   9   0   32.70    5.20
 -10   9   0   33.10    6.10
 -11  -9   0  109.19   12.00
 -11   9   0  120.89   10.00
 -11   9   0  138.79    9.40
 -11   9   0  100.69   11.60
 -12  -9   0    3.30    3.40
 -12   9   0   -1.70    1.70
 -12   9   0   -1.00    2.80
   0 -10   0  880.51   28.50
   0  10   0  842.52   31.90
   0  10   0  978.60   28.70
   1 -10   0   89.19    6.90
  -1 -10   0   83.59    6.90
  -1  10   0   98.39   11.10
  -1  10   0   98.29    7.10
   1  10   0  103.79   10.90
   1  10   0   82.19    6.20
  -2 -10   0   56.39    6.80
   2 -10   0   65.39    7.00
   2  10   0   80.69    5.70
   2  10   0   70.89    9.20
  -2  10   0   46.20    6.90
  -2  10   0   60.79    6.60
  -3 -10   0   41.50    4.60
  -3 -10   0   44.50    6.30
   3 -10   0   32.00    4.80
  -3  10   0   39.00    5.60
   3  10   0   30.40    5.80
  -3  10   0   40.90    6.70
  -4 -10   0   15.60    4.10
  -4 -10   0   16.30    3.00
   4 -10   0   18.00    3.60
  -4  10   0   14.90    3.90
  -4  10   0   14.70    4.00
   4  10   0   20.00    3.10
   4  10   0   14.80    4.60
   5 -10   0   49.99    6.20
  -5 -10   0   42.80    6.50
  -5  10   0   53.19    8.00
   5  10   0   45.80    3.30
   5  10   0   41.20    7.10
  -5  10   0   37.90    5.80
   5  10   0   48.50    3.50
  -6 -10   0  130.59    9.90
   6 -10   0  137.79    8.60
   6  10   0  130.19    4.90
  -6  10   0  123.29   10.40
   6  10   0  118.69    4.70
  -6  10   0  119.99    9.10
   6  10   0  117.09   10.60
  -7 -10   0    6.50    3.10
   7 -10   0    1.30    1.80
  -7  10   0    0.90    2.10
  -7  10   0    1.30    1.80
   7  10   0   -0.90    1.30
   8 -10   0  340.97   15.00
  -8 -10   0  335.37   17.40
  -8  10   0  316.07   16.20
  -8  10   0  314.87   17.70
   8  10   0  199.18   25.50
  -9 -10   0   90.59   10.60
   9 -10   0   83.19    7.10
  -9  10   0   81.99    9.30
   9  10   0   60.19    9.30
  -9  10   0   91.99   11.00
 -10 -10   0   28.50    6.40
 -10  10   0   21.70    5.20
 -10  10   0   14.70    4.40
 -10  10   0   30.00    5.40
  10  10   0   25.50    6.50
 -11 -10   0    5.20    3.40
  11  10   0    4.80    3.70
 -11  10   0    0.10    2.10
 -11  10   0    8.50    3.80
 -11  10   0    6.70    3.20
   0 -11   0   -1.20    1.20
   0  11   0    1.60    2.50
   0  11   0    0.20    1.80
  -1 -11   0   58.09    7.20
   1 -11   0   63.49    7.20
  -1  11   0   54.09    6.70
  -1  11   0   67.69   10.00
   1  11   0   50.89    6.10
   1  11   0   74.59   10.50
   2 -11   0   -0.20    1.30
  -2 -11   0    1.00    2.00
  -2  11   0   -0.20    1.60
   2  11   0    1.00    2.30
  -2  11   0   -0.40    1.90
   2  11   0    0.80    1.30
   3 -11   0  143.89    9.20
  -3 -11   0  150.38   10.30
  -3  11   0  165.48   12.40
   3  11   0  162.68   12.50
   3  11   0  166.98    8.50
  -3  11   0  188.08   20.60
   4 -11   0  110.19    7.90
  -4 -11   0  113.19    8.90
  -4  11   0  106.39    8.50
   4  11   0  115.89   13.40
  -4  11   0  114.29   12.80
  -5 -11   0  196.08   12.30
   5 -11   0  192.28   10.80
  -5  11   0  185.88   11.80
   5  11   0  209.88   14.50
  -5  11   0  181.98   13.30
   5  11   0  199.88    8.10
   6 -11   0   16.40    3.90
  -6 -11   0   14.10    4.30
   6  11   0    8.60    4.30
  -6  11   0   13.00    3.80
   6  11   0   10.80    1.70
  -6  11   0   11.60    4.60
  -7 -11   0   31.00    6.00
   7 -11   0   28.30    4.90
  -7  11   0   31.80    7.00
   7  11   0   24.50    6.10
  -7  11   0   28.30    5.50
  -8 -11   0   19.30    5.20
   8 -11   0   15.80    3.70
   8  11   0    9.70    4.20
  -8  11   0   12.80    4.10
  -8  11   0    6.30    2.80
   9 -11   0   12.60    3.50
  -9 -11   0   10.60    4.40
   9  11   0    9.00    4.00
  -9  11   0    8.50    4.30
  -9  11   0    9.30    3.90
   0 -12   0   12.10    3.40
   0  12   0   16.00    3.90
   0  12   0   13.20    5.00
   1 -12   0    0.60    1.70
  -1 -12   0    2.10    1.90
  -1  12   0    0.30    1.50
   1  12   0   -0.60    1.40
  -1  12   0    1.40    3.40
   1  12   0   -1.10    1.20
   2 -12   0    1.10    1.70
  -2 -12   0    3.10    2.20
  -2  12   0    1.80    2.80
   2  12   0    1.60    1.70
   2  12   0    2.60    2.40
  -2  12   0    0.80    1.80
  -3 -12   0    1.70    2.40
   3 -12   0    3.70    2.20
  -3  12   0    1.80    2.00
   3  12   0    3.20    2.00
  -3  12   0    6.00    3.70
   3  12   0    5.20    3.30
   4 -12   0   -1.30    1.10
  -4 -12   0    5.30    2.70
   4  12   0    1.90    1.50
  -4  12   0   -3.70    1.00
   4  12   0    0.90    3.50
  -4  12   0    3.50    2.60
   5 -12   0    2.60    1.90
  -5 -12   0   -0.10    1.90
   5  12   0    2.90    2.80
  -5  12   0    2.80    2.50
   5  12   0    1.80    1.20
  -5  12   0   -0.20    1.90
  -6 -12   0    0.40    1.60
   6 -12   0    2.10    1.90
   6  12   0    1.00    2.40
  -6  12   0    2.00    2.00
  -6  12   0   -0.20    1.90
   7 -12   0    0.40    1.30
  -7 -12   0    8.90    3.70
  -7  12   0    2.90    2.80
   7  12   0    3.60    3.10
  -7  12   0    2.90    2.70
   0 -13   0    1.30    2.10
   0  13   0   -0.10    1.60
   0  13   0    0.10    1.50
   1 -13   0   -0.10    1.30
  -1 -13   0    2.70    2.20
  -1  13   0    1.50    2.20
   1  13   0    0.80    2.60
  -1  13   0    1.20    4.40
  -2 -13   0   19.10    4.60
   2 -13   0   12.00    3.50
   2  13   0   19.80    6.00
  -2  13   0   17.70    5.60
   2  13   0   16.00    3.60
  -2  13   0   23.40    5.00
   3 -13   0    3.10    2.20
  -3 -13   0    3.70    2.90
   3  13   0   -0.70    1.60
  -3  13   0    4.00    2.60
  -3  13   0    3.30    3.10
   3  13   0    2.30    1.60
  -4 -13   0   48.60    7.60
   4 -13   0   55.99    7.30
   4  13   0   61.19   10.20
  -4  13   0   45.30    6.90
   4  13   0   58.39    4.90
  -4  13   0   69.69   11.80
  -5 -13   0   -1.30    1.60
   5 -13   0    0.00    1.20
  -5  13   0   -1.10    1.70
  -5  13   0    0.20    2.50
   5  13   0    1.50    2.10
 -16   0   1   -0.10    2.30
 -16   0   1    1.30    1.20
 -15   0   1   25.00    3.90
 -15   0   1   25.50    6.00
 -14   0   1    0.00    1.90
 -14   0   1   -0.10    1.10
  13   0  -1   22.30    4.70
 -13   0   1   22.60    3.50
 -13   0   1   24.30    6.00
 -12   0   1    0.80    1.70
 -12   0   1    1.10    1.30
  12   0  -1   -0.50    1.00
  12   0  -1   -0.50    0.90
  11   0  -1  691.73   21.60
 -11   0   1  721.23   25.80
  11   0  -1  756.82   27.90
 -11   0   1  693.73   21.20
 -10   0   1    0.60    1.50
 -10   0   1    1.00    1.20
  10   0  -1    0.40    0.90
  10   0  -1    1.20    1.20
  -9   0   1   88.59    6.80
   9   0  -1   71.69    5.80
   9   0  -1   74.39    4.60
  -9   0   1   72.29    4.40
  -8   0   1    1.00    1.40
   8   0  -1    4.90    1.90
  -8   0   1    3.00    1.90
   8   0  -1    1.60    1.30
   8   0  -1    2.10    1.40
  -8   0   1    1.90    1.10
   7   0  -1  169.98    6.80
  -7   0   1  168.48    6.60
  -7   0   1  170.28    8.60
   7   0  -1  169.18    8.40
   7   0  -1  182.68    8.40
   6   0  -1   -0.50    0.60
  -6   0   1   -0.60    0.60
   6   0  -1   -0.10    0.50
  -6   0   1    1.50    1.20
   6   0  -1    1.00    0.90
   5   0  -1  472.55   15.60
  -5   0   1  538.45   16.10
   5   0  -1  526.25   14.20
   4   0  -1    0.40    0.40
   4   0  -1    0.20    0.60
  -4   0   1   -0.20    0.60
  -4   0   1    0.80    0.50
  -3   0   1 4134.59  105.69
  -3   0   1 4278.77  100.99
   3   0  -1 4229.78  100.99
  -2   0   1    0.40    0.20
   2   0  -1    0.20    0.20
   2   0  -1    0.00    0.40
  -2   0   1    0.00    0.30
  -1   0   1    0.60    0.30
   1   0   1  326.97    9.50
  -2   0  -1   -0.20    0.20
   2   0   1    0.60    0.40
   2   0   1    0.00    0.20
  -2   0  -1    0.40    0.40
   3   0   1 1949.70   49.99
  -3   0  -1 1973.80   53.79
   3   0   1 1968.80   53.39
  -4   0  -1    0.90    0.70
   4   0   1    0.20    0.50
  -4   0  -1    0.60    0.50
   4   0   1    0.60    0.40
   5   0   1  745.33   21.20
   6   0   1   -0.10    0.50
  -6   0  -1    1.00    0.70
  -6   0  -1    0.90    1.00
   6   0   1   -0.20    0.50
  -7   0  -1  227.48   10.20
   7   0   1  237.18    8.40
   7   0   1  217.58    9.70
  -7   0  -1  222.18    8.10
  -8   0  -1    0.50    1.40
  -8   0  -1   -0.10    1.00
   8   0   1    0.30    1.00
   8   0   1   -0.90    0.80
   8   0   1    1.30    1.40
   9   0   1   25.90    4.20
  -9   0  -1   31.60    3.60
  -9   0  -1   34.50    5.20
   9   0   1   39.40    4.10
  10   0   1    0.90    1.50
  10   0   1   -0.10    0.90
 -10   0  -1    0.30    0.90
 -10   0  -1   -0.70    1.30
  11   0   1  178.08    8.50
 -11   0  -1  166.98    8.10
  11   0   1  185.48   10.90
 -11   0  -1  178.58   10.80
 -12   0  -1    0.40    1.80
  12   0   1    1.60    1.50
 -12   0  -1    0.10    1.00
 -13   0  -1   18.00    3.30
  13   0   1   13.80    4.00
 -13   0  -1   16.60    4.20
 -14   0  -1   -0.10    0.90
 -14   0  -1   -0.90    2.00
 -15   0  -1   11.70    4.10
 -15   0  -1   12.50    3.00
 -16   0  -1   -0.60    0.90
 -16   0  -1   -2.10    1.60
 -16  -1   1   18.90    5.20
 -16   1   1   27.70    6.20
 -16   1   1   36.90    5.20
 -15  -1   1   90.59   10.70
 -15  -1   1   84.49    5.40
 -15   1   1   89.89   10.60
 -15   1   1   80.69    6.40
 -14  -1   1    5.30    1.80
 -14  -1   1    3.00    2.80
 -14   1   1    7.30    2.50
 -14   1   1    4.30    2.70
 -13  -1   1   87.59    5.30
  13  -1  -1   89.39   10.30
 -13  -1   1   84.39    9.80
  13   1  -1   97.59    5.80
 -13   1   1   88.89   10.10
 -13   1   1   84.29    6.10
  13   1  -1   89.69    8.10
 -12  -1   1    6.60    1.80
  12  -1  -1    8.90    3.40
 -12  -1   1    5.90    2.80
 -12   1   1    5.20    2.80
 -12   1   1    2.60    1.80
  12   1  -1    4.70    2.30
 -11  -1   1    5.90    2.90
 -11  -1   1    4.80    1.50
  11  -1  -1    4.20    2.50
 -11   1   1    4.20    1.80
  11   1  -1    2.30    2.20
  11   1  -1    2.90    1.40
 -11   1   1    5.70    2.60
 -10  -1   1  107.19    8.00
  10  -1  -1   95.09    6.00
  10  -1  -1  111.29    7.80
 -10  -1   1  109.69    5.30
  10   1  -1  111.49    7.60
 -10   1   1   96.19    5.90
  10   1  -1  107.99    5.50
 -10   1   1  100.69    7.60
   9  -1  -1  421.66   18.70
   9  -1  -1  442.86   16.40
  -9  -1   1  460.75   18.00
  -9  -1   1  474.25   13.90
   9   1  -1  459.55   14.10
  -9   1   1  469.45   17.70
  -9   1   1  472.45   15.20
  -8  -1   1   25.70    2.70
   8  -1  -1   29.80    3.50
  -8  -1   1   31.10    4.70
   8  -1  -1   30.90    4.70
  -8   1   1   32.80    4.50
  -8   1   1   24.20    3.10
   8   1  -1   29.70    3.00
   8   1  -1   27.00    4.40
  -8   1   1   24.70    3.80
   7  -1  -1  747.93   22.70
  -7  -1   1  772.32   23.50
   7  -1  -1  725.93   20.80
  -7  -1   1  717.93   19.30
  -7   1   1  749.62   20.80
  -7   1   1  734.13   22.60
   7   1  -1  697.63   22.80
  -7   1   1  699.23   22.20
   7   1  -1  735.93   19.40
   6  -1  -1  504.05   15.20
  -6  -1   1  510.45   17.10
  -6  -1   1  508.15   13.80
   6  -1  -1  510.35   16.60
  -6   1   1  520.35   15.20
   6   1  -1  511.05   15.30
  -6   1   1  516.65   16.50
  -6   1   1  529.85   16.70
   6   1  -1  505.05   16.90
   5  -1  -1  583.74   16.50
   5  -1  -1  605.04   17.70
  -5  -1   1  602.04   18.30
  -5   1   1  598.94   17.60
   5   1  -1  583.14   15.10
  -5   1   1  599.34   17.60
   5   1  -1  539.25   17.60
   4  -1  -1   14.90    2.30
  -4  -1   1   13.00    2.20
  -4  -1   1   10.40    1.00
   4  -1  -1    9.30    1.50
  -4   1   1   10.10    1.70
  -4   1   1    7.00    1.30
  -4   1   1   10.90    2.00
   4   1  -1    8.10    1.70
   4   1  -1    8.40    1.00
   3  -1  -1   86.59    4.10
   3  -1  -1   87.79    4.00
  -3  -1   1   93.69    2.70
  -3  -1   1   90.99    4.40
   3  -1  -1   93.79    3.80
  -3   1   1   86.19    4.00
  -3   1   1   90.29    3.80
   3   1  -1   90.89    2.70
   3   1  -1   87.29    4.30
  -3   1   1   86.09    4.00
  -3   1   1   94.69    4.10
   2  -1  -1  647.74   20.10
   2  -1  -1  661.23   21.10
  -2  -1   1  675.63   22.30
  -2   1   1  663.43   21.50
  -2   1   1  681.03   20.90
   2   1  -1  658.73   22.20
   1  -1  -1   33.40    1.80
  -1  -1   1   35.50    1.00
  -1  -1   1   34.30    1.80
   1  -1  -1   37.90    1.80
   1  -1  -1   35.80    1.70
   1   1  -1   35.90    1.80
   1   1  -1   36.30    1.10
  -1   1   1   36.60    1.70
  -1   1   1   32.70    1.60
  -1   1   1   32.00    1.80
   0  -1   1  153.18    4.70
   0  -1  -1  163.28    4.60
   0   1  -1  163.98    5.10
   0   1   1  154.68    4.60
   0   1   1  158.98    4.40
   1  -1   1 2474.55   60.39
   1  -1   1 2455.25   58.79
  -1  -1  -1 2491.85   61.49
  -1   1  -1 2476.85   58.69
  -1   1  -1 2433.86   60.29
   1   1   1 2460.05   61.49
   1   1   1 2417.06   58.09
   1   1   1 2495.25   58.19
  -2  -1  -1  553.54   19.10
  -2  -1  -1  549.25   14.60
   2  -1   1  542.95   17.00
   2  -1   1  537.45   17.20
  -2   1  -1  543.75   17.10
  -2   1  -1  537.45   16.80
   2   1   1  524.55   14.40
   2   1   1  529.55   18.90
  -2   1  -1  524.95   17.30
   3  -1   1  408.36   11.90
  -3  -1  -1  377.66   11.70
  -3   1  -1  397.86   11.80
  -3   1  -1  375.96   11.00
   3   1   1  387.36   11.80
  -3   1  -1  397.96   11.20
  -3   1  -1  391.96   11.20
  -4  -1  -1   13.70    2.20
   4  -1   1   12.10    1.80
   4  -1   1   12.10    2.20
  -4  -1  -1   11.40    1.30
  -4   1  -1   10.50    1.70
   4   1   1   11.40    2.00
  -4   1  -1   11.40    1.70
  -4   1  -1   11.20    1.80
   4   1   1   12.20    1.30
   5  -1   1   51.29    3.20
   5  -1   1   52.69    3.80
  -5  -1  -1   54.99    4.00
  -5  -1  -1   53.69    2.60
  -5   1  -1   52.89    3.60
  -5   1  -1   55.59    3.70
  -5   1  -1   53.59    3.30
   5   1   1   59.09    2.70
   5   1   1   54.69    3.90
  -6  -1  -1   93.69    5.80
  -6  -1  -1   94.19    4.00
   6  -1   1   95.39    6.50
   6  -1   1   92.19    4.80
  -6   1  -1  102.89    5.00
   6   1   1   91.49    4.00
  -6   1  -1   98.19    5.50
  -6   1  -1   97.99    5.50
   6   1   1  104.89    6.00
  -7  -1  -1   19.10    2.20
   7  -1   1   17.70    3.50
  -7  -1  -1   14.30    3.00
   7  -1   1   14.40    2.50
   7   1   1   16.80    2.10
   7   1   1   14.80    3.50
  -7   1  -1   14.10    2.90
  -7   1  -1   12.80    2.20
  -7   1  -1   20.60    3.20
   8  -1   1  316.17   11.60
   8  -1   1  322.77   13.50
  -8  -1  -1  340.67   10.60
  -8   1  -1  317.17   12.80
   8   1   1  322.77   13.50
  -8   1  -1  338.97   11.80
   8   1   1  326.87   10.60
  -8   1  -1  340.77   13.30
  -9  -1  -1    3.30    1.30
   9  -1   1    2.80    1.40
  -9  -1  -1    4.90    2.30
   9  -1   1    3.20    2.10
  -9   1  -1    5.80    1.80
   9   1   1    1.50    1.00
  -9   1  -1    1.00    1.40
 -10  -1  -1    1.70    1.70
  10  -1   1    0.90    1.10
 -10  -1  -1    1.90    1.10
  10  -1   1    1.40    1.60
  10   1   1    1.20    1.40
 -10   1  -1    2.80    2.00
 -10   1  -1    2.40    2.10
  10   1   1    3.00    1.30
 -11  -1  -1   14.50    3.90
 -11  -1  -1    7.30    2.00
  11  -1   1    4.60    2.20
 -11   1  -1   15.70    4.00
 -11   1  -1   10.20    2.50
  11   1   1    7.90    2.90
  11   1   1   13.40    2.60
  12  -1   1   39.00    6.70
 -12  -1  -1   31.80    3.80
 -12  -1  -1   26.70    5.10
  12   1   1   30.50    3.80
 -12   1  -1   40.00    6.70
 -12   1  -1   24.00    4.00
  12   1   1   39.80    6.50
  13  -1   1   25.40    5.30
 -13   1  -1   32.90    6.30
  13   1   1   31.00    4.00
 -13   1  -1   30.90    4.40
  13   1   1   32.70    6.30
 -14  -1  -1    5.30    3.00
 -14  -1  -1   15.40    2.80
 -14   1  -1   12.20    3.10
 -14   1  -1    9.70    3.70
 -15  -1  -1    4.90    1.80
 -15  -1  -1   -0.50    2.00
 -15   1  -1    1.50    1.50
 -15   1  -1   -1.00    1.60
 -16  -1  -1   11.60    4.60
 -16   1  -1   15.90    4.80
 -16  -2   1    6.50    6.20
 -16   2   1    1.00    1.50
 -16   2   1    3.20    2.80
 -15  -2   1   17.20    5.20
 -15   2   1   12.40    4.10
 -14  -2   1   30.40    6.10
 -14  -2   1   29.00    3.20
 -14   2   1   28.30    4.80
 -14   2   1   19.70    5.10
 -13  -2   1    6.50    1.60
  13  -2  -1    2.90    2.40
 -13  -2   1    4.60    2.80
  13   2  -1    6.20    1.70
 -13   2   1    5.60    3.20
  13   2  -1    5.60    2.50
 -13   2   1    5.70    2.30
  12  -2  -1    1.20    1.40
 -12  -2   1    0.60    0.80
 -12  -2   1    0.30    1.90
 -12   2   1   -0.40    1.10
  12   2  -1    0.20    0.80
 -12   2   1    3.30    2.10
 -11  -2   1   21.70    5.00
 -11  -2   1   16.70    2.20
  11  -2  -1   13.10    3.90
 -11   2   1   12.20    3.40
  11   2  -1   20.40    2.50
 -11   2   1   13.00    2.90
 -10  -2   1    2.40    2.00
 -10  -2   1   -0.50    0.50
  10  -2  -1   -0.30    1.00
  10   2  -1    2.40    1.00
 -10   2   1   -0.70    1.40
 -10   2   1    1.30    1.30
  -9  -2   1  135.99    8.80
  -9  -2   1  128.99    5.10
   9  -2  -1  130.19    7.20
   9  -2  -1  145.39    8.80
  -9   2   1  125.99    9.50
  -9   2   1  135.29    8.30
   9   2  -1  146.09    5.50
   8  -2  -1  316.97   12.30
  -8  -2   1  320.57   14.00
  -8  -2   1  331.07    9.70
   8  -2  -1  346.67   15.60
  -8   2   1  336.47   13.30
  -8   2   1  336.97   12.30
  -8   2   1  364.36   13.90
  -7  -2   1  541.95   18.90
  -7  -2   1  541.45   14.20
   7  -2  -1  534.25   17.00
   7  -2  -1  547.15   18.70
  -7   2   1  564.24   18.00
  -7   2   1  540.95   18.00
  -7   2   1  556.34   17.10
   7   2  -1  547.15   14.30
   7   2  -1  522.65   18.50
  -6   2   1 1378.66   35.90
   6   2  -1 1306.77   36.70
   5  -2  -1  336.97   11.90
   5  -2  -1  306.17   10.70
  -5  -2   1  319.57   11.90
  -5  -2   1  318.07    8.20
  -5   2   1  315.77   10.90
   5   2  -1  325.87    8.30
  -5   2   1  335.37   11.30
   5   2  -1  317.87   11.80
  -5   2   1  318.27   11.40
  -5   2   1  315.27   10.70
   4  -2  -1  508.75   14.80
   4  -2  -1  533.55   15.20
  -4  -2   1  514.05   15.80
   4  -2  -1  507.85   15.70
   4   2  -1  511.25   15.80
  -4   2   1  495.95   14.70
  -4   2   1  491.45   15.30
  -4   2   1  506.05   14.80
   3  -2  -1   82.49    3.90
   3  -2  -1   85.19    4.00
  -3  -2   1   84.49    4.40
   3  -2  -1   87.09    4.50
   3   2  -1   74.79    4.30
  -3   2   1   85.39    3.90
  -3   2   1   78.69    3.90
   2   2  -1  552.34   16.20
   1  -2  -1  408.86   11.70
   1   2  -1  379.96   10.90
   0  -2   1   80.49    3.80
   0  -2  -1   79.39    3.10
   0  -2   1   80.99    3.00
   0  -2   1   83.09    3.10
   0   2  -1   79.19    3.70
   0   2  -1   77.99    3.00
   0   2   1   81.09    3.80
   0   2   1   81.89    3.10
   0   2   1   77.19    3.20
   0   2  -1   75.59    3.00
  -1  -2  -1 3516.45   85.39
  -1  -2  -1 3582.54   89.69
   1  -2   1 3610.94   86.39
   1  -2   1 3518.75   87.99
  -1   2  -1 3598.44   88.09
  -1   2  -1 3599.74   86.49
   1   2   1 3523.25   85.49
   1   2   1 3697.73   89.89
  -2  -2  -1 5535.45  138.69
   2  -2   1 5726.73  134.69
   2   2   1 5534.65  131.29
  -2   2  -1 5724.03  136.79
  -2   2  -1 5810.22  134.59
   2   2   1 5648.44  131.49
   2   2   1 5435.46  138.49
   3  -2   1  580.24   16.80
   3  -2   1  567.84   15.90
  -3   2  -1  576.04   15.30
   3   2   1  558.24   16.50
  -4  -2  -1  241.58    6.50
  -4  -2  -1  228.18    9.10
   4  -2   1  239.38    8.40
   4  -2   1  235.68   10.10
   4   2   1  238.78    9.20
   4   2   1  245.48    6.50
  -4   2  -1  235.58    9.00
  -4   2  -1  247.78    8.40
  -4   2  -1  236.68    8.40
  -4   2  -1  247.18    8.20
   5  -2   1  750.32   22.50
   5  -2   1  744.23   21.20
  -5  -2  -1  759.52   22.50
  -5   2  -1  764.62   22.20
   5   2   1  756.82   22.40
  -5   2  -1  777.62   21.40
  -5   2  -1  766.82   21.20
   6  -2   1    8.30    2.10
  -6  -2  -1    6.70    1.10
  -6  -2  -1    8.70    2.10
   6  -2   1    8.60    1.90
  -6   2  -1    7.90    1.90
   6   2   1    7.80    1.10
  -6   2  -1    7.40    1.70
  -6   2  -1    7.10    1.80
   6   2   1    7.80    2.00
   7  -2   1   45.80    5.80
  -7  -2  -1   25.00    1.90
   7  -2   1   23.80    3.20
  -7  -2  -1   18.50    3.40
   7   2   1   36.20    4.80
  -7   2  -1   30.50    3.80
  -7   2  -1   28.40    3.60
  -7   2  -1   27.60    3.40
  -8  -2  -1  175.98    6.30
   8  -2   1  176.88    9.60
   8  -2   1  157.88    7.90
  -8  -2  -1  183.58    9.70
  -8   2  -1  178.88    8.70
   8   2   1  172.48    6.30
  -8   2  -1  178.78    8.90
  -8   2  -1  187.88    8.40
   9  -2   1  231.18   11.60
  -9  -2  -1  228.78   11.60
   9  -2   1  204.38    9.60
  -9  -2  -1  221.18    7.70
  -9   2  -1  198.08   10.10
  -9   2  -1  203.48    9.50
  -9   2  -1  234.28   11.10
   9   2   1  227.38    7.80
 -10  -2  -1  328.77   15.00
  10  -2   1  309.77   14.70
 -10  -2  -1  301.07   10.00
  10   2   1  295.87   10.20
 -10   2  -1  308.27   13.80
 -10   2  -1  307.87   12.40
 -11  -2  -1   54.59    3.50
 -11  -2  -1   60.99    7.70
  11  -2   1   45.20    6.30
 -11   2  -1   61.69    6.30
  11   2   1   48.70    3.50
 -11   2  -1   55.99    7.00
  12  -2   1  160.28   11.00
 -12  -2  -1  160.98    6.70
 -12  -2  -1  152.58   10.70
  12   2   1  143.89    6.70
  12   2   1  159.28   10.50
 -12   2  -1  170.28    9.10
 -12   2  -1  152.58   10.20
 -13  -2  -1  221.78    8.50
 -13  -2  -1  242.08   14.20
  13  -2   1  199.58   13.20
  13   2   1  209.18    8.60
  13   2   1  209.28   12.90
 -13   2  -1  223.98   11.10
 -13   2  -1  214.58   12.90
 -14  -2  -1    0.80    0.90
 -14  -2  -1    1.60    2.30
 -14   2  -1    0.80    2.30
 -14   2  -1   -1.00    1.10
 -15  -2  -1   -2.40    1.30
 -15  -2  -1    1.70    1.60
 -15   2  -1    4.80    2.90
 -15   2  -1    1.30    1.80
 -15  -3   1   37.20    7.00
 -15   3   1   33.40    5.40
 -15   3   1   43.20    7.20
 -14  -3   1    7.70    3.50
 -14   3   1    7.70    3.10
  13  -3  -1   13.70    4.60
 -13  -3   1   12.70    4.40
  13   3  -1   12.20    4.20
 -13   3   1   12.00    3.30
 -13   3   1   19.80    4.90
  12  -3  -1    1.00    1.40
 -12   3   1    1.50    1.80
 -12   3   1    2.00    2.20
  12   3  -1    1.50    0.60
 -11  -3   1   23.30    2.00
 -11  -3   1   26.90    5.30
  11  -3  -1   21.70    4.60
  11   3  -1   23.20    1.50
 -11   3   1   21.90    4.00
 -11   3   1   27.80    4.70
  10  -3  -1  256.67   13.30
 -10  -3   1  236.98   12.90
  10   3  -1  249.78    7.10
 -10   3   1  257.87   11.40
 -10   3   1  243.48   12.20
  -9  -3   1  231.18   12.10
  -9  -3   1  220.88    6.40
   9  -3  -1  240.78   12.20
   9   3  -1  227.88    6.40
  -9   3   1  233.18   10.40
  -9   3   1  230.58   11.20
   8  -3  -1  309.77   13.60
  -8  -3   1  305.27   13.60
   8  -3  -1  303.27   13.30
  -8  -3   1  292.17    7.70
  -8   3   1  290.37   12.10
   8   3  -1  295.67    7.70
  -8   3   1  291.67   12.40
  -8   3   1  309.27   12.00
   7  -3  -1   46.70    5.80
   7  -3  -1   36.20    4.20
  -7  -3   1   44.20    5.60
  -7   3   1   38.80    4.60
   7   3  -1   47.60    5.80
  -7   3   1   45.30    5.50
  -7   3   1   37.90    4.40
  -7   3   1   51.19    4.20
   6  -3  -1  691.53   20.80
   6  -3  -1  722.53   21.10
   6  -3  -1  681.83   22.00
  -6  -3   1  711.53   22.30
  -6   3   1  707.93   20.80
  -6   3   1  683.23   20.50
  -6   3   1  674.73   21.60
  -6   3   1  690.13   20.90
   6   3  -1  657.03   21.80
  -5  -3   1  281.27   11.30
   5  -3  -1  296.87   10.50
   5  -3  -1  303.47   10.70
   5   3  -1  289.67   11.40
  -5   3   1  280.87   10.40
  -5   3   1  272.27   10.00
  -5   3   1  269.57   10.90
  -4  -3   1    5.80    1.60
   4  -3  -1    5.80    1.40
   4  -3  -1    2.70    1.10
   4  -3  -1    3.90    1.40
  -4   3   1    6.80    1.50
  -4   3   1    5.40    1.30
   4   3  -1    4.00    1.40
  -4   3   1    4.70    1.60
   3  -3  -1  398.36   12.80
   3  -3  -1  412.06   13.80
   3  -3  -1  414.46   12.50
  -3  -3   1  420.96   13.40
  -3   3   1  421.76   13.60
  -3   3   1  419.86   12.40
   3   3  -1  417.66   13.40
   3   3  -1  417.26   10.20
  -3   3   1  424.16   12.90
   3   3  -1  422.86   10.10
  -2  -3   1   67.29    2.50
   2  -3  -1   62.29    3.50
   2  -3  -1   67.49    4.20
  -2  -3   1   64.39    3.70
   2  -3  -1   65.69    3.40
   2   3  -1   61.39    2.40
  -2   3   1   61.19    3.90
  -2   3   1   62.29    3.50
   2   3  -1   64.19    3.70
  -2   3   1   64.29    3.30
  -1  -3   1    9.30    1.50
  -1  -3   1    9.90    1.20
   1  -3  -1   11.60    1.70
   1  -3  -1    8.50    1.50
  -1   3   1    6.40    1.20
   1   3  -1   10.70    2.10
   1   3  -1    7.40    1.40
  -1   3   1    7.20    1.50
  -1   3   1    9.70    1.70
   0  -3   1   48.40    2.60
   0  -3  -1   48.30    3.50
   0  -3  -1   53.79    3.00
   0  -3   1   52.09    2.70
   0  -3   1   53.89    3.60
   0   3  -1   50.49    3.40
   0   3   1   52.69    3.60
   0   3   1   54.09    3.00
   0   3  -1   46.20    2.70
   0   3  -1   48.70    2.60
   0   3   1   50.39    2.70
   1  -3   1  279.57    8.30
   1  -3   1  269.67    8.80
  -1  -3  -1  289.57    8.20
  -1  -3  -1  276.37    9.10
   1  -3   1  286.77    9.90
   1   3   1  285.47    9.20
   1   3   1  277.97    8.20
  -1   3  -1  275.57    9.70
  -1   3  -1  282.87    8.40
  -1   3  -1  287.17    8.90
  -2  -3  -1 3969.90  103.09
   2  -3   1 3993.90  100.89
  -2  -3  -1 3909.61   95.29
   2  -3   1 3952.80   98.39
  -2   3  -1 4051.79   98.39
   2   3   1 3761.72  102.79
  -2   3  -1 3999.90  100.99
   2   3   1 4099.79   96.69
   3  -3   1  597.74   17.20
   3  -3   1  579.24   18.10
   3  -3   1  612.84   16.40
  -3  -3  -1  617.24   17.90
   3   3   1  597.94   17.80
  -3   3  -1  586.74   16.90
  -3   3  -1  602.24   17.20
   4  -3   1  728.93   19.60
   4  -3   1  708.73   20.30
  -4  -3  -1  699.53   21.10
  -4   3  -1  686.43   21.00
  -4   3  -1  710.03   19.30
   4   3   1  719.13   21.20
  -4   3  -1  735.73   20.40
   5  -3   1    1.00    0.90
   5  -3   1   -0.30    0.60
   5  -3   1    1.90    1.00
  -5  -3  -1   -0.10    0.70
  -5   3  -1    2.10    1.30
  -5   3  -1    0.30    0.60
   5   3   1    0.80    0.40
   5   3   1    3.00    0.50
   5   3   1    1.60    1.00
  -5   3  -1   -0.50    0.60
  -6  -3  -1  338.57    9.00
  -6  -3  -1  360.16   13.70
   6  -3   1  335.27   13.40
   6   3   1  323.27   13.10
  -6   3  -1  362.46   12.50
  -6   3  -1  360.56   12.30
   6   3   1  339.07    9.00
  -6   3  -1  317.77   12.90
  -6   3  -1  341.97   11.90
  -7  -3  -1  274.37    8.00
   7  -3   1  276.27   12.30
  -7  -3  -1  280.57   12.30
   7  -3   1  277.17   11.00
   7   3   1  257.97   11.90
  -7   3  -1  275.27   11.00
  -7   3  -1  279.47   10.80
  -7   3  -1  278.87   11.00
   7   3   1  272.77    7.70
  -7   3  -1  277.17   12.00
  -8  -3  -1   51.19    2.50
   8  -3   1   57.49    6.80
  -8  -3  -1   55.29    6.60
  -8   3  -1   55.19    4.70
  -8   3  -1   59.89    4.70
  -8   3  -1   48.10    5.10
   8   3   1   53.39    2.50
  -9  -3  -1  357.26   10.10
   9  -3   1  351.86   15.70
  -9  -3  -1  359.36   15.70
  -9   3  -1  384.26   16.00
  -9   3  -1  332.97   13.80
   9   3   1  358.26   10.40
  -9   3  -1  356.66   13.90
 -10  -3  -1  814.02   28.10
  10  -3   1  807.12   28.30
 -10  -3  -1  774.92   20.70
 -10   3  -1  828.72   25.70
 -10   3  -1  801.02   26.40
  10   3   1  832.42   22.20
 -11  -3  -1  222.58    7.40
 -11  -3  -1  247.08   13.40
  11  -3   1  228.88   13.20
  11   3   1  230.28    7.50
 -11   3  -1  222.98   11.90
 -11   3  -1  228.48   11.10
  12  -3   1  439.96   20.50
 -12  -3  -1  450.95   23.50
 -12  -3  -1  440.36   12.90
 -12   3  -1  470.85   17.80
 -12   3  -1  487.15   19.60
  12   3   1  465.05   13.00
 -13  -3  -1   55.29    3.00
 -13  -3  -1   49.10    7.70
  13  -3   1   69.69   10.40
 -13   3  -1   50.79    6.40
 -13   3  -1   67.79    8.40
  13   3   1   51.99    3.00
 -14  -3  -1   38.30    2.70
 -14  -3  -1   46.00    7.90
 -14   3  -1   42.20    6.90
 -14   3  -1   50.29    6.50
 -15  -3  -1   24.50    6.10
 -15   3  -1   24.30    5.50
 -15   3  -1   22.90    4.70
 -15  -4   1   58.49    9.30
 -15   4   1   74.39    9.70
 -15   4   1   48.70    6.50
 -14  -4   1   37.00    7.20
 -14   4   1   42.50    7.00
 -14   4   1   37.40    5.90
 -13  -4   1    2.00    2.50
 -13   4   1    0.00    1.80
 -13   4   1   -2.10    0.90
 -12  -4   1    3.40    2.60
  12  -4  -1    5.60    3.00
 -12   4   1    3.50    2.20
 -12   4   1    6.70    2.80
 -11  -4   1   29.00    5.60
  11  -4  -1   41.10    6.40
 -11   4   1   38.70    5.70
 -11   4   1   30.40    4.80
 -10  -4   1   33.30    5.60
  10  -4  -1   26.10    5.30
 -10   4   1   30.80    4.60
 -10   4   1   30.00    4.80
  -9  -4   1  141.09    9.40
   9  -4  -1  140.89    9.50
  -9   4   1  124.19    8.00
  -9   4   1  122.69    7.70
   8  -4  -1  182.98   10.60
  -8  -4   1  195.48   10.70
  -8   4   1  192.38    9.50
  -8   4   1  200.78    9.80
  -8   4   1  192.98   10.30
  -8   4   1  198.28    9.40
  -7  -4   1 1980.80   53.19
   7  -4  -1 1926.61   53.19
  -7   4   1 1954.60   52.69
   6  -4  -1  166.08    7.90
   6  -4  -1  157.38    7.90
   6  -4  -1  162.28    8.90
  -6   4   1  163.68    7.50
   6   4  -1  151.08    8.40
  -6   4   1  162.48    7.90
   5  -4  -1  131.59    6.50
  -5  -4   1  127.39    7.30
   5  -4  -1  137.89    7.80
   5  -4  -1  134.39    7.00
  -5   4   1  132.69    7.40
   5   4  -1  117.49    7.20
  -5   4   1  137.59    6.40
  -5   4   1  141.79    7.00
  -4  -4   1   28.80    3.70
   4  -4  -1   24.80    3.60
   4  -4  -1   29.70    3.40
   4  -4  -1   26.30    3.30
   4   4  -1   27.30    1.20
   4   4  -1   26.80    1.20
  -4   4   1   29.80    4.00
  -4   4   1   26.70    3.10
  -4   4   1   28.90    3.60
   4   4  -1   22.70    3.30
   3  -4  -1   42.00    4.80
  -3  -4   1   38.50    3.30
  -3  -4   1   34.00    1.80
   3  -4  -1   38.90    3.20
   3  -4  -1   35.90    2.80
   3   4  -1   44.10    4.60
  -3   4   1   38.80    3.90
  -3   4   1   43.60    4.80
  -3   4   1   33.90    2.70
   3   4  -1   35.00    1.80
   2  -4  -1  433.36   13.10
   2  -4  -1  417.76   13.40
  -2  -4   1  449.86   13.90
   2  -4  -1  430.56   14.90
  -2  -4   1  430.76   11.80
  -2   4   1  440.96   13.10
  -2   4   1  443.66   13.60
   2   4  -1  432.16   11.80
   2   4  -1  435.66   13.90
  -2   4   1  434.96   14.70
   1  -4  -1  149.49    6.20
   1  -4  -1  158.18    6.40
  -1  -4   1  152.88    5.60
   1  -4  -1  156.48    7.60
  -1  -4   1  152.68    6.40
   1   4  -1  163.58    6.60
   1   4  -1  149.09    5.60
  -1   4   1  177.38    6.60
  -1   4   1  159.08    6.30
   1   4  -1  159.38    7.50
   0  -4  -1  353.16   11.30
   0  -4   1  351.46   10.80
   0  -4   1  352.06   10.90
   0  -4   1  345.57   12.70
   0  -4  -1  353.56   10.90
   0   4  -1  350.96   11.00
   0   4  -1  369.06   10.90
   0   4   1  355.56   11.30
   0   4   1  353.16   12.60
   0   4   1  359.26   10.90
  -1  -4  -1 6041.50  147.79
   1  -4   1 6124.79  149.69
  -1  -4  -1 6248.38  153.58
   1  -4   1 5927.11  150.38
  -1   4  -1 6073.09  150.58
   1   4   1 6172.68  148.09
  -1   4  -1 6179.38  150.18
   1   4   1 6095.49  153.48
   2  -4   1    8.80    2.30
  -2  -4  -1    5.70    1.10
   2  -4   1    3.00    1.00
  -2  -4  -1    5.00    1.50
   2  -4   1    6.20    1.50
  -2   4  -1    5.60    1.40
  -2   4  -1    4.40    1.10
  -2   4  -1    3.70    1.40
   2   4   1    5.00    1.50
   2   4   1    5.60    1.10
   3  -4   1  916.51   25.10
   3  -4   1  909.51   26.60
   3   4   1  868.81   25.60
  -3   4  -1  941.41   23.90
   4  -4   1   27.70    3.10
   4  -4   1   23.80    3.20
  -4  -4  -1   26.90    3.80
   4  -4   1   34.10    4.70
   4   4   1   22.20    1.40
   4   4   1   18.70    3.10
  -4   4  -1   28.20    4.00
  -4   4  -1   25.60    2.70
  -4   4  -1   22.90    3.10
   4   4   1   23.90    1.50
  -5  -4  -1  142.19    7.70
   5  -4   1  134.89    7.80
   5  -4   1  143.29    6.60
   5  -4   1  133.39    7.00
  -5   4  -1  138.89    7.10
   5   4   1  155.38    4.30
  -5   4  -1  151.98    7.90
   5   4   1  139.69    7.70
  -5   4  -1  144.49    6.40
   5   4   1  148.29    4.30
   6  -4   1  665.13   20.90
   6  -4   1  671.03   22.50
   6  -4   1  655.83   20.10
   6   4   1  687.43   22.50
  -6   4  -1  670.63   19.80
  -6   4  -1  695.93   22.20
   6   4   1  664.43   15.90
   6   4   1  671.03   15.90
  -6   4  -1  660.23   21.90
   7  -4   1   31.00    4.40
  -7  -4  -1   43.20    5.40
  -7   4  -1   45.90    5.20
  -7   4  -1   49.99    4.20
  -7   4  -1   52.79    6.20
  -7   4  -1   45.80    3.80
  -8  -4  -1  261.17   12.80
   8  -4   1  245.78   12.70
  -8   4  -1  273.57   12.70
  -8   4  -1  247.48   10.70
  -8   4  -1  266.57   11.60
  -8   4  -1  277.57   11.50
  -9  -4  -1 1075.29   33.80
   9  -4   1 1062.89   34.10
  -9   4  -1 1042.20   31.40
  -9   4  -1 1010.40   32.50
  -9   4  -1 1067.99   31.50
  10  -4   1    3.40    2.40
 -10  -4  -1    1.00    2.00
 -10   4  -1    3.30    2.10
 -10   4  -1    4.00    2.20
  11  -4   1  200.58   12.70
 -11  -4  -1  216.08   12.80
 -11   4  -1  204.28   10.90
 -11   4  -1  205.18   11.30
  12  -4   1   17.90    4.70
 -12  -4  -1   17.30    4.50
 -12   4  -1   23.10    4.50
 -12   4  -1   22.30    4.60
 -13  -4  -1   51.89    8.20
 -13   4  -1   53.99    7.00
 -13   4  -1   65.89    8.00
 -14  -4  -1   53.79    8.30
 -14   4  -1   54.39    7.00
 -14   4  -1   54.39    7.60
 -15  -4  -1    1.80    2.60
 -15   4  -1    3.30    2.60
 -15   4  -1    2.00    2.10
 -15  -5   1   -0.60    2.10
 -15   5   1    0.80    1.80
 -15   5   1   -2.60    1.30
 -14  -5   1   22.30    5.90
 -14   5   1   22.20    4.80
 -14   5   1   16.20    4.40
 -13  -5   1    5.30    3.30
 -13   5   1    0.80    1.70
 -13   5   1    4.20    2.60
 -12  -5   1    6.60    3.40
  12  -5  -1   12.70    4.30
 -12   5   1   16.40    4.00
 -12   5   1   12.60    3.50
 -11  -5   1   10.40    4.30
  11  -5  -1    9.00    3.50
 -11   5   1   12.50    3.60
 -11   5   1   12.70    3.50
 -10  -5   1  582.54   23.30
  10  -5  -1  573.44   23.60
 -10   5   1  578.04   21.20
 -10   5   1  602.54   21.50
  -9  -5   1   38.20    6.10
   9  -5  -1   36.70    6.30
  -9   5   1   43.90    5.80
  -9   5   1   58.69    7.70
  -9   5   1   34.90    5.10
   8  -5  -1 1227.18   38.30
  -8  -5   1 1261.27   37.80
  -8   5   1 1240.68   35.80
  -8   5   1 1230.48   37.70
  -8   5   1 1177.68   34.60
  -8   5   1 1241.98   37.30
   7  -5  -1   11.10    3.20
   7  -5  -1   20.30    3.60
  -7  -5   1   22.90    4.20
  -7   5   1   18.30    3.60
  -7   5   1   18.00    3.80
  -7   5   1   20.30    3.30
   6  -5  -1    8.70    2.40
  -6  -5   1    3.10    1.80
   6  -5  -1    9.30    2.90
  -6   5   1    7.40    2.30
  -6   5   1    9.20    2.50
  -6   5   1    5.60    1.70
   5  -5  -1   68.69    5.80
   5  -5  -1   78.69    5.40
  -5  -5   1   79.49    6.70
   5  -5  -1   60.99    4.50
  -5   5   1   81.99    6.00
  -5   5   1   78.79    4.80
   5   5  -1   74.49    5.70
  -5   5   1   83.79    6.30
   4  -5  -1    3.10    1.50
   4  -5  -1    7.70    1.90
   4  -5  -1    3.40    1.40
  -4  -5   1    8.70    2.30
   4   5  -1    5.20    0.90
  -4   5   1    4.00    1.50
   4   5  -1    7.70    2.30
   4   5  -1    8.30    1.00
  -4   5   1    6.20    1.60
  -4   5   1    7.20    2.00
   3  -5  -1  394.96   13.80
  -3  -5   1  401.76   14.20
   3  -5  -1  420.26   13.30
  -3  -5   1  407.66   11.30
   3  -5  -1  418.96   15.50
   3   5  -1  386.46   14.10
  -3   5   1  400.66   13.10
  -3   5   1  428.16   14.00
   3   5  -1  395.86   11.30
  -3   5   1  410.86   15.10
   2  -5  -1  318.87   10.80
   2  -5  -1  320.27   12.90
   2  -5  -1  304.87   11.10
  -2  -5   1  303.67   11.20
  -2  -5   1  311.57    9.60
   2   5  -1  315.57   11.50
  -2   5   1  307.67   10.70
   2   5  -1  317.57    9.70
   2   5  -1  317.07   12.80
  -2   5   1  312.97   11.20
   1  -5  -1   35.00    3.00
  -1  -5   1   36.60    3.10
  -1  -5   1   32.10    2.50
   1  -5  -1   32.40    3.40
   1  -5  -1   27.30    3.60
   1   5  -1   37.40    2.70
  -1   5   1   54.69    5.80
  -1   5   1   40.10    3.10
   1   5  -1   38.90    5.00
   1   5  -1   35.60    3.10
  -1   5   1   39.50    3.10
   0  -5   1 2141.99   59.39
   0  -5  -1 2075.19   61.89
   0  -5   1 2041.20   60.59
   0  -5  -1 2071.39   59.19
   0   5   1 2095.99   59.29
   0   5  -1 2100.39   61.29
   0   5   1 2111.89   62.79
   0   5  -1 2054.19   58.99
   1  -5   1   56.69    3.80
   1  -5   1   59.69    3.70
  -1  -5  -1   51.89    3.90
  -1  -5  -1   62.49    3.50
   1  -5   1   61.99    5.00
   1   5   1   60.09    3.50
   1   5   1   54.99    4.00
  -1   5  -1   61.99    4.00
  -1   5  -1   60.39    4.80
  -1   5  -1   59.89    3.70
   1   5   1   54.49    4.70
   2  -5   1  160.88    7.20
  -2  -5  -1  167.58    7.60
   2  -5   1  169.08    6.70
  -2  -5  -1  153.98    6.00
   2   5   1  171.38    6.20
  -2   5  -1  163.08    7.20
  -2   5  -1  167.18    8.40
  -2   5  -1  154.78    6.50
   2   5   1  156.88    7.50
   3  -5   1   38.80    4.20
  -3  -5  -1   44.00    2.60
   3  -5   1   45.70    3.20
  -3  -5  -1   46.20    5.10
   3  -5   1   49.70    5.80
   3   5   1   42.70    2.60
   3   5   1   46.90    4.00
  -3   5  -1   44.10    3.10
  -3   5  -1   45.80    3.80
  -3   5  -1   46.90    5.50
   4  -5   1  433.06   16.50
   4  -5   1  454.25   14.10
  -4  -5  -1  441.36   15.80
   4  -5   1  419.86   14.90
  -4   5  -1  441.76   13.80
  -4   5  -1  449.36   15.20
   4   5   1  448.96   11.90
   4   5   1  451.95   15.90
   4   5   1  446.16   12.00
  -4   5  -1  425.06   16.00
   5  -5   1  175.88    9.60
   5  -5   1  160.88    7.40
  -5  -5  -1  208.28   14.20
   5  -5   1  164.28    8.20
   5   5   1  166.98    9.00
  -5   5  -1  171.88    8.50
   5   5   1  162.68    5.00
  -5   5  -1  168.78    7.30
  -5   5  -1  167.28    9.10
   5   5   1  172.88    5.20
   6  -5   1   47.20    3.90
  -6  -5  -1   53.39    6.20
   6  -5   1   56.69    6.70
  -6   5  -1   44.70    3.60
  -6   5  -1   47.40    5.40
  -6   5  -1   61.39    7.20
   7  -5   1  114.89    6.70
  -7  -5  -1  109.89    7.80
   7  -5   1  118.19    8.40
  -7   5  -1  117.29    6.70
  -7   5  -1  122.89    8.10
  -7   5  -1  110.09    7.10
  -7   5  -1  112.09    6.30
  -8  -5  -1  113.89    8.40
   8  -5   1  118.09    8.80
  -8   5  -1  133.49    7.60
  -8   5  -1  126.59    7.90
  -8   5  -1  127.79    7.10
  -8   5  -1  130.29    8.70
   9  -5   1   21.00    4.60
  -9  -5  -1   16.90    4.10
  -9   5  -1   23.10    3.90
  -9   5  -1   14.20    3.30
  -9   5  -1   23.60    5.10
  10  -5   1  207.58   12.80
 -10  -5  -1  218.88   12.70
 -10   5  -1  197.88   10.80
 -10   5  -1  192.88   10.50
  11  -5   1   28.90    6.40
 -11  -5  -1   32.80    7.10
 -11   5  -1   32.80    5.30
 -11   5  -1   31.30    5.20
 -12  -5  -1  205.48   13.20
  12  -5   1  185.88   13.30
 -12   5  -1  167.48   10.70
 -12   5  -1  201.28   11.50
 -13  -5  -1    1.60    2.10
 -13   5  -1    4.00    2.40
 -13   5  -1   -0.40    1.50
 -14  -5  -1    1.30    2.50
 -14   5  -1    1.30    2.10
 -14   5  -1    2.70    2.30
 -15  -5  -1    3.00    2.60
 -15   5  -1    8.50    3.30
 -15   5  -1   15.60    4.50
 -14   6   1   -0.80    1.50
 -14   6   1   -0.30    1.40
 -13  -6   1   71.79    9.80
 -13   6   1   70.99    8.50
 -12  -6   1   52.79    7.90
 -12   6   1   66.79    7.80
 -12   6   1   57.39    7.10
  11  -6  -1  148.69   11.70
 -11  -6   1  145.59   11.00
 -11   6   1  143.39    9.70
 -11   6   1  131.69    9.20
 -10  -6   1   88.59   11.00
  10  -6  -1   88.39   10.30
 -10   6   1  101.49    7.60
 -10   6   1   93.39    7.50
 -10   6   1   89.59    8.00
  -9  -6   1  122.59    9.40
   9  -6  -1  138.59   10.20
  -9   6   1  117.79    8.00
  -9   6   1  119.09    8.90
  -9   6   1  114.29    8.10
  -8  -6   1  545.55   21.60
   8  -6  -1  566.14   22.60
   8  -6  -1  564.24   19.70
  -8   6   1  534.25   20.00
  -8   6   1  550.94   21.40
  -7  -6   1  853.51   28.30
   7  -6  -1  856.51   29.40
  -7   6   1  843.42   28.10
  -7   6   1  841.02   26.80
  -7   6   1  822.82   25.30
   6  -6  -1   80.39    7.00
   6  -6  -1   82.19    5.70
  -6  -6   1   81.59    6.60
  -6   6   1   79.79    6.60
  -6   6   1   84.89    5.50
  -6   6   1   80.49    6.10
  -5  -6   1  222.18   10.80
   5  -6  -1  218.48   11.70
   5  -6  -1  234.28    9.80
   5   6  -1  222.98    6.20
  -5   6   1  200.58    9.90
   5   6  -1  225.28    6.20
  -5   6   1  217.58   11.20
  -5   6   1  213.88    9.20
   4  -6  -1  327.47   14.70
   4  -6  -1  348.37   12.50
  -4  -6   1  332.17   11.10
  -4   6   1  360.46   13.50
  -4   6   1  337.67   14.40
   4   6  -1  345.77   10.00
   4   6  -1  343.77   13.90
  -4   6   1  344.67   12.40
   3  -6  -1  109.09    6.40
   3  -6  -1  110.39    7.60
   3  -6  -1  101.79    5.80
  -3  -6   1  104.09    6.40
  -3  -6   1  120.39    4.80
   3   6  -1  104.39    6.60
  -3   6   1  114.89    7.40
   3   6  -1  106.79    4.70
  -3   6   1  108.69    6.40
   3   6  -1  101.29    7.40
  -3   6   1  117.69    6.10
  -2  -6   1  254.47    8.90
   2  -6  -1  255.77   10.10
   2  -6  -1  246.58   12.10
   2  -6  -1  247.48   10.30
  -2  -6   1  267.87   10.60
   2   6  -1  265.47   12.20
   2   6  -1  268.37   10.90
  -2   6   1  248.78   11.70
  -2   6   1  276.47   10.60
  -2   6   1  258.17   10.10
   2   6  -1  286.67    9.30
   1  -6  -1  182.98    7.90
  -1  -6   1  173.28    7.80
   1  -6  -1  168.68    9.60
   1  -6  -1  170.08    7.80
  -1  -6   1  168.88    7.10
  -1   6   1  174.38    7.80
   1   6  -1  157.98    7.80
  -1   6   1  163.68    9.10
   1   6  -1  179.58    9.40
  -1   6   1  171.38    7.80
   1   6  -1  168.38    7.10
   0  -6  -1  397.16   13.10
   0  -6   1  389.06   13.00
   0  -6  -1  384.06   13.50
   0  -6   1  399.66   13.30
   0   6   1  399.96   15.60
   0   6  -1  393.86   15.40
   0   6   1  394.96   13.10
   0   6   1  388.66   13.70
   0   6  -1  400.86   13.10
   0   6  -1  408.26   13.60
   1  -6   1 1261.27   37.40
  -1  -6  -1 1297.67   33.40
   1  -6   1 1266.47   34.20
  -1   6  -1 1275.77   34.00
   1   6   1 1269.37   35.10
  -1   6  -1 1299.27   36.90
   1   6   1 1304.17   37.40
   2  -6   1 1122.39   33.10
  -2  -6  -1 1084.09   30.60
   2  -6   1 1106.19   29.30
   2  -6   1 1069.19   30.00
  -2  -6  -1 1091.49   28.30
  -2   6  -1 1052.09   29.10
  -2   6  -1 1071.59   32.20
   2   6   1 1096.39   28.40
   2   6   1 1069.29   32.90
   2   6   1 1059.49   30.80
  -3  -6  -1   14.80    2.00
   3  -6   1   13.90    2.40
  -3  -6  -1   12.60    2.70
   3  -6   1   17.80    3.90
   3  -6   1   13.60    2.60
  -3   6  -1   13.70    2.80
   3   6   1   23.40    5.80
   3   6   1   13.60    3.00
  -3   6  -1   12.50    2.30
   3   6   1   17.50    2.20
  -3   6  -1    8.10    2.50
  -4  -6  -1   61.59    6.30
   4  -6   1   58.99    4.20
   4  -6   1   64.49    7.50
  -4   6  -1   55.49    4.70
   4   6   1   64.89    7.50
  -4   6  -1   42.40    5.00
   4   6   1   54.59    3.10
  -4   6  -1   59.29    4.10
   4   6   1   54.29    2.90
   5  -6   1   34.30    3.90
  -5  -6  -1   33.20    4.70
   5  -6   1   38.10    6.80
   5   6   1   31.20    2.00
  -5   6  -1   38.80    4.10
  -5   6  -1   41.60    5.90
  -5   6  -1   33.30    4.40
   5   6   1   31.90    1.90
  -6  -6  -1   49.30    6.30
   6  -6   1   43.30    6.40
   6  -6   1   37.60    4.30
   6   6   1   40.10    1.60
   6   6   1   43.80    1.60
  -6   6  -1   29.00    4.30
  -6   6  -1   47.40    3.90
  -6   6  -1   40.20    5.40
   7  -6   1   46.40    6.10
  -7  -6  -1   56.99    6.80
   7  -6   1   54.29    4.70
  -7   6  -1   50.59    6.00
  -7   6  -1   69.89    8.10
  -7   6  -1   57.79    4.50
   8  -6   1    3.40    2.10
  -8  -6  -1    6.30    2.80
  -8   6  -1    3.50    2.20
  -8   6  -1    2.50    1.40
  -8   6  -1    5.30    2.50
  -8   6  -1    2.90    2.70
  -9  -6  -1  346.37   16.70
  -9   6  -1  348.17   16.40
  -9   6  -1  359.36   15.40
  -9   6  -1  336.97   14.30
  10  -6   1  175.28   12.30
 -10   6  -1  192.48   10.80
 -10   6  -1  156.48    9.30
 -10   6  -1  152.28   10.80
  11  -6   1    4.30    2.50
 -11  -6  -1    1.50    2.20
 -11   6  -1    1.40    1.80
 -11   6  -1    1.00    1.90
 -12  -6  -1   10.40    3.70
 -12   6  -1   13.30    3.60
 -12   6  -1   11.10    3.50
 -13  -6  -1   35.40    7.10
 -13   6  -1   31.00    5.50
 -13   6  -1   25.00    5.40
 -14   6  -1   24.80    5.20
 -14   6  -1   34.80    6.30
 -13  -7   1    2.20    2.50
 -13   7   1    3.70    2.60
 -13   7   1    5.30    3.00
 -12  -7   1   36.80    6.90
 -12   7   1   47.40    6.90
 -12   7   1   39.30    6.30
 -11  -7   1   14.40    4.40
 -11   7   1   14.90    4.20
 -11   7   1   19.10    4.30
 -11   7   1   23.80    5.90
  10  -7  -1  151.18   12.00
 -10  -7   1  164.68   11.80
 -10   7   1  170.58   10.10
 -10   7   1  171.78   11.60
 -10   7   1  161.78   10.50
  -9  -7   1   63.89    7.90
   9  -7  -1   55.49   11.90
  -9   7   1   68.99    7.70
  -9   7   1   76.09    8.40
  -9   7   1   73.69    7.80
   8  -7  -1   60.49    6.80
   8  -7  -1   54.79    8.30
  -8  -7   1   52.69    7.10
  -8   7   1   65.99    7.40
  -8   7   1   66.79    8.50
   7  -7  -1   44.20    6.60
  -7  -7   1   55.09    6.70
   7  -7  -1   55.79    6.20
  -7   7   1   68.49    8.40
  -7   7   1   51.39    6.30
   6  -7  -1  661.03   25.10
  -6  -7   1  652.63   23.30
  -6   7   1  645.24   23.80
  -6   7   1  628.34   20.60
  -6   7   1  648.74   22.30
   5  -7  -1  154.98   12.10
   5  -7  -1   97.59    6.30
  -5  -7   1  109.29    7.60
  -5   7   1  111.19    6.50
  -5   7   1  107.09    7.20
   5   7  -1  102.19    4.00
   5   7  -1  104.49    4.00
  -5   7   1  101.09    7.80
   4  -7  -1  333.37   12.70
  -4  -7   1  344.47   14.00
  -4  -7   1  327.57   10.20
  -4   7   1  324.87   12.50
  -4   7   1  331.67   14.90
   4   7  -1  318.37   15.40
   4   7  -1  338.57   10.30
  -4   7   1  329.17   13.50
  -3  -7   1    1.40    1.40
  -3  -7   1    0.80    0.90
   3  -7  -1   -0.10    1.10
   3  -7  -1    2.80    2.10
  -3   7   1    0.40    1.30
  -3   7   1   -0.10    1.30
   3   7  -1    1.80    1.10
   3   7  -1    2.40    2.00
  -3   7   1    2.10    1.50
  -2  -7   1  651.03   20.70
  -2  -7   1  602.94   18.40
   2  -7  -1  603.54   20.30
   2  -7  -1  663.13   20.20
   2  -7  -1  676.93   23.90
  -2   7   1  610.74   21.30
   2   7  -1  620.24   20.80
  -2   7   1  649.04   22.80
  -2   7   1  643.54   20.50
   2   7  -1  653.73   23.10
   2   7  -1  646.44   18.70
  -1  -7   1    3.40    1.60
   1  -7  -1    1.00    1.70
   1  -7  -1    4.10    1.60
  -1  -7   1    5.00    1.60
   1  -7  -1    3.70    1.60
  -1   7   1    3.40    2.00
  -1   7   1    2.90    1.60
   1   7  -1    3.20    1.60
   1   7  -1    3.20    2.00
   1   7  -1    4.60    1.60
  -1   7   1    4.30    1.80
   0  -7  -1    6.40    1.90
   0  -7   1    8.40    2.10
   0  -7   1   10.00    3.00
   0   7  -1    5.60    1.80
   0   7  -1    9.40    2.50
   0   7  -1    3.10    1.80
   0   7   1    9.40    2.50
   0   7   1    8.50    2.10
   0   7   1    6.50    2.70
   1  -7   1   16.20    4.00
  -1  -7  -1   14.80    2.80
   1  -7   1    9.30    2.20
   1  -7   1   16.30    3.00
  -1  -7  -1   11.00    2.20
  -1   7  -1   10.00    2.50
  -1   7  -1    8.70    2.50
  -1   7  -1   12.80    2.70
   1   7   1    9.80    2.20
   1   7   1    8.80    2.80
   1   7   1   17.50    3.30
   2  -7   1 1037.50   28.60
  -2  -7  -1 1035.20   30.10
  -2  -7  -1 1030.80   27.60
   2  -7   1 1023.70   32.80
   2  -7   1  994.80   29.40
  -2   7  -1 1011.30   29.50
   2   7   1 1039.70   27.70
  -2   7  -1  993.30   28.50
   2   7   1  981.20   30.10
  -2   7  -1 1044.40   32.10
   2   7   1 1024.80   32.60
   3  -7   1  363.46   16.30
   3  -7   1  371.36   12.90
  -3  -7  -1  346.97   11.50
  -3  -7  -1  345.57   14.10
  -3   7  -1  363.76   13.90
   3   7   1  352.36   11.60
  -3   7  -1  367.06   15.60
   3   7   1  349.87   16.00
  -3   7  -1  343.57   12.60
   4  -7   1   90.49    7.70
   4  -7   1   96.09    5.80
  -4  -7  -1   95.49    6.90
  -4  -7  -1   90.79    4.40
   4   7   1   87.99    4.30
  -4   7  -1   86.49    6.30
  -4   7  -1   99.19    5.70
   4   7   1   96.29    7.90
  -4   7  -1   93.99    7.30
   4   7   1   94.39    4.50
   5  -7   1   38.30    4.50
   5  -7   1   54.99    7.70
  -5  -7  -1   41.40    5.50
   5   7   1   40.20    2.60
  -5   7  -1   42.00    5.10
  -5   7  -1   31.60    4.70
  -5   7  -1   64.29    8.00
   5   7   1   39.80    2.50
   6  -7   1  101.09    6.30
   6  -7   1  108.49    8.70
  -6  -7  -1   94.19    7.50
  -6   7  -1   89.39    5.80
  -6   7  -1   93.79    7.70
   6   7   1   94.69    3.40
  -6   7  -1   99.19    7.20
   6   7   1   96.89    3.30
  -7  -7  -1   26.10    5.00
   7  -7   1   34.70    5.10
   7  -7   1   29.40    6.00
  -7   7  -1   42.70    6.80
  -7   7  -1   36.30    4.40
  -7   7  -1   26.90    4.50
   8  -7   1   28.80    5.90
   8  -7   1   28.00    4.20
  -8  -7  -1   29.00    5.50
  -8   7  -1   30.80    4.60
  -8   7  -1   30.90    5.20
  -8   7  -1   22.10    4.20
   9  -7   1    7.90    3.40
  -9  -7  -1   14.30    4.90
  -9   7  -1   12.90    3.20
  -9   7  -1    7.10    2.80
  -9   7  -1    8.80    3.20
  10  -7   1  195.18   17.60
 -10  -7  -1  206.18   13.10
 -10   7  -1  201.78   10.80
 -10   7  -1  211.18   12.00
 -10   7  -1  185.98   12.30
 -11  -7  -1  157.08   11.60
 -11   7  -1  142.79    9.40
 -11   7  -1  151.98   10.40
 -12  -7  -1   25.70    6.10
 -12   7  -1   26.10    5.60
 -12   7  -1   27.80    5.00
 -13  -7  -1   51.59    8.30
 -13   7  -1   55.79    8.00
 -13   7  -1   42.60    6.10
 -13  -8   1    1.40    3.10
 -13   8   1    7.00    3.10
 -13   8   1    7.30    4.10
 -12  -8   1   25.40    6.00
 -12   8   1   20.30    4.90
 -12   8   1   23.80    5.60
 -11  -8   1    4.30    3.10
 -11   8   1    6.10    3.00
 -11   8   1    5.80    3.00
 -11   8   1    3.70    2.20
 -10  -8   1    3.40    2.80
 -10   8   1    0.70    1.90
 -10   8   1   -0.90    1.50
 -10   8   1    1.70    2.10
   9  -8  -1   24.10    4.40
  -9  -8   1   21.40    5.20
   9  -8  -1   24.10    5.70
  -9   8   1   10.90    3.50
  -9   8   1   14.50    3.90
  -9   8   1   15.70    3.90
  -8  -8   1   49.30    7.30
   8  -8  -1   48.70    6.20
   8  -8  -1   49.10    8.10
  -8   8   1   37.70    6.00
   7  -8  -1   11.40    2.90
  -7  -8   1    7.30    3.00
   7  -8  -1   10.30    3.60
  -7   8   1   13.50    3.50
  -7   8   1    7.80    3.10
   6  -8  -1    6.10    2.30
   6  -8  -1    2.40    2.50
  -6  -8   1    9.60    3.10
   6   8  -1    7.80    0.80
   6   8  -1    6.10    0.70
   6   8  -1    4.00    2.40
  -6   8   1   10.50    3.50
  -6   8   1    5.80    2.70
  -5  -8   1   86.59    7.10
   5  -8  -1   80.49    6.00
   5  -8  -1   81.29    9.70
   5   8  -1   81.59    3.90
   5   8  -1   93.49    8.30
  -5   8   1   64.79    7.50
   5   8  -1   77.19    3.70
  -5   8   1   80.19    6.60
   4  -8  -1   60.19    5.00
  -4  -8   1   53.49    6.20
   4  -8  -1   81.19   10.80
  -4  -8   1   57.59    3.60
   4   8  -1   40.30    6.00
  -4   8   1   65.09    5.20
  -4   8   1   49.50    5.90
  -4   8   1   53.99    7.00
   4   8  -1   63.49    3.80
   3  -8  -1    1.00    1.80
  -3  -8   1    1.20    1.00
  -3  -8   1    0.70    1.50
   3  -8  -1    2.20    1.70
  -3   8   1   -0.10    1.30
   3   8  -1    0.30    0.90
  -3   8   1   -0.20    1.00
  -3   8   1   -1.50    0.90
   2  -8  -1   10.40    2.80
  -2  -8   1    6.50    2.40
  -2  -8   1    8.20    2.10
   2  -8  -1   10.80    3.10
   2   8  -1   11.80    3.60
  -2   8   1    6.60    2.90
  -2   8   1   12.00    2.70
  -2   8   1   13.80    3.30
   2   8  -1    8.30    2.20
  -1  -8   1   17.40    3.10
  -1  -8   1   18.40    3.10
   1  -8  -1   14.60    3.00
  -1   8   1   13.80    3.10
   1   8  -1   20.70    4.60
  -1   8   1   17.90    4.40
   1   8  -1   19.00    3.10
  -1   8   1   16.20    3.30
   0  -8   1   35.10    4.30
   0  -8  -1   47.10    5.20
   0  -8  -1   45.90    4.90
   0   8  -1   54.69    8.20
   0   8  -1   37.60    4.70
   0   8   1   41.20    6.00
   0   8  -1   37.80    6.00
  -1  -8  -1   14.70    2.80
   1  -8   1   17.70    3.20
  -1  -8  -1   13.40    3.00
   1   8   1   16.00    2.90
   1   8   1   20.80    4.60
  -1   8  -1   16.10    3.30
  -1   8  -1   10.80    2.70
  -1   8  -1   17.50    4.30
   2  -8   1  199.38    9.20
  -2  -8  -1  197.78    8.60
   2  -8   1  229.58   16.50
  -2  -8  -1  207.68   10.30
   2   8   1  181.58   11.40
   2   8   1  199.98    8.70
  -2   8  -1  174.78    8.90
  -2   8  -1  212.58   11.80
  -2   8  -1  187.98    9.50
  -3  -8  -1  390.86   15.80
   3  -8   1  411.96   14.70
  -3  -8  -1  409.56   13.20
   3  -8   1  385.96   18.20
   3   8   1  408.66   13.40
   3   8   1  380.56   17.80
  -3   8  -1  370.66   14.20
  -3   8  -1  414.36   15.80
  -3   8  -1  409.86   17.60
   4  -8   1    3.10    2.20
  -4  -8  -1    3.40    2.10
   4  -8   1    5.80    1.90
  -4  -8  -1    4.20    1.30
   4   8   1    1.70    2.30
   4   8   1    5.10    1.50
  -4   8  -1    4.00    2.50
  -4   8  -1    5.00    1.80
  -4   8  -1    2.80    2.00
   5  -8   1   58.89    4.90
  -5  -8  -1   60.99    7.40
   5  -8   1   87.89   10.30
   5   8   1   46.70    6.40
   5   8   1   67.69    3.70
  -5   8  -1   51.99    4.60
  -5   8  -1   78.39    8.20
  -5   8  -1   62.79    7.50
   5   8   1   63.09    3.40
  -6  -8  -1    2.60    2.30
   6  -8   1   -1.50    0.70
  -6   8  -1   -0.30    2.00
  -6   8  -1   -0.80    1.00
  -6   8  -1   -0.20    0.80
   6   8   1    0.40    0.50
   6   8   1    0.70    0.60
  -7  -8  -1   48.20    6.70
   7  -8   1   41.20    5.30
  -7   8  -1   31.90    5.10
  -7   8  -1   36.70    5.70
   8  -8   1   27.30    4.40
  -8   8  -1   35.70    8.10
  -8   8  -1   35.50    6.30
  -9  -8  -1   66.39    8.60
  -9   8  -1   57.89    7.40
  -9   8  -1   78.19    8.80
  -9   8  -1   62.49    6.70
 -10  -8  -1  157.58   11.80
 -10   8  -1  168.78   12.10
 -10   8  -1  167.98   10.00
 -10   8  -1  168.18   11.10
 -11  -8  -1   70.39    9.30
 -11   8  -1   68.19    8.20
 -11   8  -1   82.09   14.80
 -11   8  -1   89.99    7.30
 -12  -8  -1   12.00    4.40
 -12   8  -1    9.20    3.30
 -12   8  -1   19.50    5.00
 -13  -8  -1   42.10    7.80
 -13   8  -1   59.39    8.50
 -13   8  -1   46.00    6.60
 -12  -9   1   -0.30    2.20
 -12   9   1    0.10    2.00
 -12   9   1    0.60    1.70
 -11  -9   1   39.20    7.40
 -11   9   1   26.80    5.60
 -11   9   1   27.70    5.60
 -11   9   1   34.80    5.70
 -10  -9   1   -1.30    1.40
 -10   9   1    3.30    2.60
 -10   9   1    2.30    1.80
   9  -9  -1   15.70    4.00
  -9  -9   1   11.80    4.20
  -9   9   1   13.10    3.70
  -9   9   1   12.50    4.30
   8  -9  -1    2.30    1.80
  -8  -9   1    7.10    3.30
  -8   9   1    8.50    3.10
  -8   9   1    8.30    3.90
   8   9  -1   -0.50    1.70
   7  -9  -1   22.90    4.30
  -7   9   1   23.90    5.40
   7   9  -1   30.70    6.80
  -7   9   1   22.50    5.00
  -6  -9   1   63.99    7.60
   6  -9  -1   79.79    6.30
   6   9  -1   66.69    2.70
  -6   9   1   63.19    8.40
  -6   9   1   53.29    6.60
   6   9  -1   44.90    6.80
   5  -9  -1   36.80    5.10
  -5  -9   1   32.60    5.50
  -5   9   1   30.60    5.80
   5   9  -1   44.40    7.90
  -5   9   1   29.30    4.90
   5   9  -1   34.30    2.60
   5   9  -1   36.20    2.70
   4  -9  -1   -0.30    1.20
  -4  -9   1    5.30    2.70
  -4  -9   1    1.50    1.10
  -4   9   1    0.90    1.70
   4   9  -1    2.70    1.30
  -4   9   1   -1.10    1.50
   4   9  -1    2.60    2.10
   3  -9  -1   60.09    6.50
  -3  -9   1   61.69    4.90
  -3  -9   1   58.89    6.70
   3   9  -1   49.50    7.00
  -3   9   1   68.89    8.70
   3   9  -1   64.19    4.50
  -3   9   1   67.29    7.10
  -2  -9   1   46.80    4.00
   2  -9  -1   43.30    5.50
  -2  -9   1   42.80    5.50
  -2   9   1   34.20    4.90
   2   9  -1   44.60    4.80
  -2   9   1   33.80    5.40
   2   9  -1   45.60    7.10
  -1  -9   1  220.18   10.70
   1  -9  -1  221.18   10.70
  -1   9   1  209.58   10.30
  -1   9   1  214.38   12.70
   1   9  -1  198.58    9.50
   1   9  -1  204.68   12.40
   0  -9  -1   29.70    4.70
   0  -9   1   28.30    4.40
   0   9   1   25.30    5.00
   0   9  -1   22.40    3.80
   0   9   1   20.80    3.60
   0   9  -1   34.00    7.30
  -1  -9  -1   72.19    7.30
   1  -9   1   53.89    5.90
  -1   9  -1   94.29   11.00
   1   9   1   58.79    8.10
  -1   9  -1   67.19    5.60
   1   9   1   60.69    5.00
  -2  -9  -1   62.39    7.20
  -2  -9  -1   41.40    4.50
   2  -9   1   56.49    6.00
   2   9   1   53.29    5.40
  -2   9  -1   53.89    6.00
   2   9   1   44.20    6.70
  -2   9  -1   50.29    7.50
  -3  -9  -1    9.00    3.00
  -3  -9  -1   10.40    2.30
   3  -9   1    9.70    2.70
  -3   9  -1    6.40    2.70
  -3   9  -1   11.30    3.90
   3   9   1    9.80    2.20
   3   9   1    3.50    2.60
   4  -9   1   11.50    2.90
  -4  -9  -1   12.50    2.30
  -4  -9  -1   11.20    3.20
   4   9   1   15.00    4.80
  -4   9  -1   12.90    4.00
  -4   9  -1   15.60    3.60
   4   9   1   10.00    2.30
  -5  -9  -1   47.40    6.50
   5  -9   1   54.49    5.80
  -5   9  -1   44.70    6.70
  -5   9  -1   60.69    7.40
   5   9   1   46.60    3.20
   5   9   1   52.79    3.50
   5   9   1   61.59    9.50
   6  -9   1    7.70    2.60
  -6  -9  -1    4.50    2.70
   6   9   1    5.60    1.20
   6   9   1    6.00    1.20
  -6   9  -1    4.50    2.50
   6   9   1    7.10    3.50
  -6   9  -1    7.90    3.30
   7  -9   1  273.97   12.40
  -7  -9  -1  297.07   15.40
   7   9   1  245.88   15.70
  -7   9  -1  266.27   14.00
  -7   9  -1  273.17   19.10
  -8  -9  -1   56.89    8.00
   8  -9   1   69.69    7.30
  -8   9  -1   51.49    7.20
  -8   9  -1   72.79    9.90
  -9  -9  -1   88.79   10.60
  -9   9  -1   55.59    8.10
  -9   9  -1   71.69    8.50
  -9   9  -1   76.99    6.60
 -10  -9  -1   12.50    4.40
 -10   9  -1    3.90    2.70
 -10   9  -1    1.90    2.60
 -10   9  -1    7.70    2.80
 -11  -9  -1   11.10    4.10
 -11   9  -1   11.30    4.50
 -11   9  -1   13.10    4.20
 -11   9  -1    5.20    2.40
 -12  -9  -1    1.90    2.60
 -12   9  -1    1.30    2.50
 -12   9  -1    2.00    1.80
 -11 -10   1   13.40    5.10
  11  10  -1   20.10    6.20
 -11  10   1    8.30    3.30
 -11  10   1    8.20    3.30
 -11  10   1   10.70    5.10
 -10 -10   1    0.50    2.50
 -10  10   1    3.90    3.50
 -10  10   1    3.00    2.10
 -10  10   1    3.20    2.70
  10  10  -1    2.60    2.80
  -9 -10   1   22.90    5.50
   9 -10  -1   25.50    5.00
   9  10  -1   16.30    5.30
  -9  10   1   26.90    5.60
  -9  10   1   16.60    5.20
   8 -10  -1    5.30    2.60
  -8 -10   1    0.80    1.80
  -8  10   1    0.90    2.00
  -8  10   1    1.20    2.10
   8  10  -1   -0.80    1.20
   7 -10  -1    0.70    1.60
  -7 -10   1    2.90    2.40
   7  10  -1    0.90    1.60
  -7  10   1   -1.60    1.20
  -7  10   1   -2.60    1.40
  -6 -10   1   77.49    8.70
   6 -10  -1   76.49    6.60
   6  10  -1   75.09    3.30
  -6  10   1   91.79   11.30
   6  10  -1   83.89   10.50
  -6  10   1   76.49    8.50
   5 -10  -1    9.80    3.10
  -5 -10   1   18.60    4.30
   5  10  -1   13.60    2.20
  -5  10   1   22.90    5.60
  -5  10   1   13.70    3.80
   5  10  -1   18.60    2.50
   5  10  -1   20.30    5.20
   4 -10  -1   14.10    3.50
  -4 -10   1   18.50    4.20
  -4  10   1   18.40    4.20
   4  10  -1   18.40    2.80
   4  10  -1   15.00    4.50
  -4  10   1   12.70    4.40
  -3 -10   1   54.69    4.40
   3 -10  -1   60.09    6.80
  -3 -10   1   45.90    6.50
  -3  10   1   52.79    6.40
   3  10  -1   55.29    7.90
   3  10  -1   57.09    6.10
  -3  10   1   52.39    7.60
  -2 -10   1   55.99    6.60
   2 -10  -1   67.49    7.20
  -2  10   1   71.59    7.60
  -2  10   1   46.00    6.80
   2  10  -1   44.80    6.70
   2  10  -1   57.09    4.90
  -1 -10   1   65.89    7.30
   1 -10  -1   69.69    7.40
  -1  10   1   60.49    8.60
   1  10  -1   67.49    8.80
   1  10  -1   66.39    5.50
  -1  10   1   60.19    6.80
   0 -10  -1    9.60    3.00
   0 -10   1   14.30    3.50
   0  10  -1   13.80    3.40
   0  10   1   12.20    3.10
   0  10   1   19.00    5.10
   0  10  -1   14.10    3.80
  -1 -10  -1    2.10    1.90
   1 -10   1    6.20    2.60
   1  10   1    5.50    2.90
  -1  10  -1    2.20    2.00
   1  10   1    4.60    2.00
  -1  10  -1    6.10    2.90
   2 -10   1  129.39    8.10
  -2 -10  -1  132.59    8.90
  -2  10  -1  133.69   10.40
   2  10   1  132.69   10.70
  -2  10  -1  130.09    8.50
   2  10   1  128.89    7.50
   3 -10   1    5.40    2.20
  -3 -10  -1   10.20    3.30
  -3 -10  -1    7.90    2.40
   3  10   1    9.70    2.50
   3  10   1    3.20    2.50
  -3  10  -1    7.90    3.50
  -3  10  -1    9.30    3.10
  -4 -10  -1    0.50    0.80
  -4 -10  -1    1.80    2.00
   4 -10   1   -0.60    1.00
   4  10   1    0.70    1.10
  -4  10  -1    3.90    2.30
   4  10   1    0.90    2.40
   5 -10   1   41.90    5.40
  -5 -10  -1   41.50    7.80
   5  10   1   37.10    3.70
   5  10   1   32.80    6.80
   5  10   1   34.40    3.50
  -5  10  -1   25.20    4.70
  -5  10  -1   22.20    5.00
  -6 -10  -1   22.00    4.90
   6 -10   1   28.80    4.60
   6  10   1   24.80    2.10
   6  10   1   27.10    6.80
  -6  10  -1   18.80    4.70
   6  10   1   23.00    2.40
  -6  10  -1   38.40    6.50
   7 -10   1   65.69    7.10
  -7 -10  -1   72.79    9.30
   7  10   1   58.19    9.90
  -7  10  -1   55.29    7.40
  -7  10  -1   81.49   10.80
   8 -10   1    4.20    2.00
  -8 -10  -1   -0.50    2.10
  -8  10  -1    1.50    1.90
   8  10   1    8.40    5.70
  -8  10  -1    4.60    2.60
  -9 -10  -1    1.90    2.20
   9  10   1    2.10    2.80
  -9  10  -1    4.40    2.80
  -9  10  -1    0.80    1.50
  -9  10  -1    2.80    2.60
 -10 -10  -1    0.10    1.80
 -10  10  -1    2.10    2.30
 -10  10  -1    0.40    1.90
 -10  10  -1    1.70    1.80
  10  10   1    0.30    1.80
 -11 -10  -1    0.40    2.30
  11  10   1   -1.30    1.30
 -11  10  -1    0.80    2.00
 -11  10  -1   -1.10    1.20
 -11  10  -1   -0.70    1.90
  -9 -11   1   41.40    7.70
  -9  11   1   41.30    7.80
  -9  11   1   54.19    9.30
   9  11  -1   34.60    7.00
  -8 -11   1   44.50    7.50
   8 -11  -1   38.90    6.10
   8  11  -1   38.50    8.50
  -8  11   1   48.40    7.50
  -8  11   1   38.70    8.10
  -7 -11   1  138.79   10.80
   7 -11  -1  115.29    8.60
  -7  11   1  137.39   10.40
   7  11  -1  139.99   12.20
  -7  11   1  103.19   12.00
   6 -11  -1   -0.90    1.10
  -6 -11   1    0.30    2.00
   6  11  -1   -2.80    3.30
  -6  11   1    0.80    2.00
   6  11  -1    0.50    0.60
  -6  11   1    0.30    1.60
   5 -11  -1    7.40    2.90
  -5 -11   1    3.80    2.90
  -5  11   1    5.70    2.90
   5  11  -1    4.00    2.70
   5  11  -1    4.30    1.50
  -5  11   1    8.30    3.80
  -4 -11   1   57.29    7.60
   4 -11  -1   48.30    6.40
  -4  11   1   52.89    8.00
   4  11  -1   45.00    8.20
   4  11  -1   64.89    8.30
  -4  11   1   63.69    7.90
   3 -11  -1    6.90    2.70
  -3 -11   1   10.00    3.20
   3  11  -1    8.90    3.50
  -3  11   1    6.00    3.60
   3  11  -1    6.90    2.20
  -3  11   1    3.10    2.80
  -2 -11   1   61.49    7.60
   2 -11  -1   70.29    7.70
   2  11  -1   69.49    5.60
   2  11  -1   74.09    9.80
  -2  11   1   62.59    8.70
  -2  11   1   55.89    6.70
  -1 -11   1   -1.20    1.20
   1 -11  -1    0.60    1.70
  -1  11   1    0.40    1.90
  -1  11   1    0.20    1.60
   1  11  -1   -2.00    1.40
   1  11  -1   -0.20    1.40
   0 -11  -1   18.50    3.90
   0 -11   1   16.00    3.80
   0  11   1   18.70    5.20
   0  11   1   15.90    3.60
   0  11  -1   15.70    3.60
   0  11  -1   23.40    6.10
   1 -11   1   84.89    6.90
  -1 -11  -1   82.29    8.70
   1  11   1   95.69   11.20
  -1  11  -1   80.29    6.90
  -1  11  -1   71.59   10.10
   1  11   1   79.09    6.40
   2 -11   1    0.50    1.30
  -2 -11  -1    1.10    1.70
   2  11   1    2.20    2.50
  -2  11  -1   -0.50    1.80
   2  11   1    1.10    1.40
  -2  11  -1   -1.10    1.30
   3 -11   1    2.10    1.80
   3  11   1    3.00    2.70
   3  11   1   -0.60    1.20
  -3  11  -1    5.10    4.70
  -3  11  -1    0.20    1.70
   4 -11   1    5.50    2.30
  -4 -11  -1    2.50    2.20
  -4  11  -1    1.60    2.10
  -4  11  -1    7.30    3.70
   4  11   1    7.10    2.40
   4  11   1    7.90    3.70
   5 -11   1    3.90    2.30
  -5 -11  -1    4.90    2.70
   5  11   1    8.30    4.00
   5  11   1    3.60    1.50
  -5  11  -1    3.00    2.70
  -5  11  -1   13.10    3.80
  -6 -11  -1   36.90    6.60
   6 -11   1   47.90    6.20
  -6  11  -1   34.50    6.60
   6  11   1   46.40    8.20
  -6  11  -1   26.60    5.30
   6  11   1   51.19    3.10
   7 -11   1    0.90    1.50
  -7 -11  -1    1.10    2.10
   7  11   1   -0.70    1.60
  -7  11  -1   -0.50    1.90
  -7  11  -1    2.70    2.10
   8 -11   1    0.70    1.30
  -8 -11  -1    2.20    2.50
  -8  11  -1    1.70    2.40
   8  11   1    2.90    2.90
  -8  11  -1    1.50    2.10
   9 -11   1   13.20    3.40
  -9  11  -1   32.40    7.10
   9  11   1   19.90    5.80
  -9  11  -1   16.20    5.20
  -9  11  -1   15.40    3.80
  -7 -12   1   49.80    7.50
   7 -12  -1   64.19    8.20
  -7  12   1   51.19    8.70
   7  12  -1   76.39   11.20
  -7  12   1   64.09   12.20
   6 -12  -1   43.60    7.20
  -6 -12   1   63.29    8.70
   6  12  -1   55.49    9.20
  -6  12   1   44.00    7.80
  -6  12   1   51.59    7.70
  -5 -12   1    4.50    2.70
   5 -12  -1    4.70    2.40
   5  12  -1    7.40    3.30
   5  12  -1   12.10    2.30
  -5  12   1    4.20    2.80
  -5  12   1    6.50    3.10
   4 -12  -1   59.49    7.40
  -4 -12   1   64.59    8.40
  -4  12   1   50.79    7.30
   4  12  -1   69.19   10.60
   4  12  -1   64.39    4.90
  -4  12   1   76.99   10.30
   3 -12  -1   15.80    3.90
  -3 -12   1   27.70    5.30
   3  12  -1   19.10    3.40
  -3  12   1   24.90    6.30
  -3  12   1   25.30    5.30
   3  12  -1   26.80    6.50
   2 -12  -1    4.00    2.30
  -2 -12   1    4.50    2.70
  -2  12   1    5.60    3.80
  -2  12   1    6.40    2.80
   2  12  -1    5.90    2.20
   2  12  -1    4.40    3.10
   1 -12  -1    3.50    2.10
   1  12  -1    5.10    2.40
  -1  12   1    8.40    3.40
  -1  12   1    4.50    2.60
   1  12  -1    4.50    3.00
   0 -12  -1    4.20    3.90
   0 -12   1    4.60    2.40
   0  12   1    3.60    2.80
   0  12  -1    2.20    2.00
   0  12  -1    1.00    1.90
   0  12   1    3.90    2.20
   1 -12   1   69.79    7.90
  -1 -12  -1   72.39    8.20
   1  12   1   78.79    8.20
  -1  12  -1   61.09    9.80
   1  12   1   65.49   10.00
   2 -12   1   33.10    5.30
  -2 -12  -1   38.60    6.00
   2  12   1   23.60    6.00
   2  12   1   31.20    4.90
  -2  12  -1   27.40    5.10
  -2  12  -1   25.30    5.90
  -3 -12  -1    2.50    2.40
   3 -12   1    1.10    1.80
  -3  12  -1   -1.50    1.40
   3  12   1   -2.60    1.30
   3  12   1    1.40    1.60
  -3  12  -1    4.10    2.50
   4 -12   1   19.10    4.00
  -4 -12  -1   17.60    4.50
   4  12   1   22.80    6.50
  -4  12  -1   27.50    6.80
   4  12   1   23.70    3.60
  -4  12  -1   20.10    4.70
   5 -12   1   20.80    4.40
  -5 -12  -1   37.00    6.50
   5  12   1   25.50    4.10
   5  12   1   29.30    7.30
  -5  12  -1   22.30    5.50
  -5  12  -1   21.00    5.10
   6 -12   1    5.20    2.40
  -6 -12  -1   16.60    4.80
  -6  12  -1    8.20    3.60
  -6  12  -1    5.80    3.20
   6  12   1    9.30    4.20
   7 -12   1   -0.60    1.00
  -7 -12  -1   -1.00    1.40
  -7  12  -1   -0.30    1.60
   7  12   1    0.30    1.80
  -7  12  -1    0.50    2.90
  -5 -13   1   11.40    4.00
   5 -13  -1    6.00    3.00
  -5  13   1    6.00    5.00
   5  13  -1    9.40    4.40
  -5  13   1   10.20    4.50
  -4 -13   1    2.80    2.60
   4 -13  -1    4.00    2.50
   4  13  -1    0.80    2.20
  -4  13   1    3.20    2.60
  -4  13   1    2.00    2.10
   4  13  -1    1.00    1.30
  -3 -13   1   88.29    9.90
   3 -13  -1   90.39    7.90
   3  13  -1   67.89    9.90
  -3  13   1  104.99   13.00
   3  13  -1  100.99    6.90
  -3  13   1  101.79    8.80
   2 -13  -1   -0.30    1.40
  -2 -13   1    2.70    2.40
   2  13  -1    0.20    2.20
   2  13  -1    2.30    1.70
  -2  13   1    2.70    3.00
  -2  13   1    4.30    2.50
   1 -13  -1   13.30    3.80
  -1 -13   1   10.50    3.50
   1  13  -1    1.80    2.70
  -1  13   1    6.80    3.10
  -1  13   1    4.90    3.70
   0 -13  -1    0.70    1.70
   0 -13   1    0.10    1.40
   0  13   1    5.60    2.40
   0  13  -1    0.80    2.00
   0  13  -1    1.80    2.10
   0  13   1    0.00    2.90
  -1 -13  -1   19.70    4.80
   1 -13   1   19.30    4.50
   1  13   1   11.90    5.10
  -1  13  -1   19.00    6.20
   1  13   1   21.30    5.00
  -1  13  -1   24.70    5.10
  -2 -13  -1   56.09    7.80
   2 -13   1   62.19    7.50
   2  13   1   58.29    6.50
   2  13   1   68.59   11.00
  -2  13  -1   70.29    8.40
  -2  13  -1   28.20    8.30
   3 -13   1   14.10    3.80
  -3 -13  -1    9.20    3.40
   3  13   1   17.50    3.60
   3  13   1   17.30    5.30
  -3  13  -1   10.60    3.80
   4 -13   1   11.50    3.40
  -4 -13  -1   11.20    3.90
   4  13   1   15.50    3.00
  -4  13  -1   10.90    5.10
   4  13   1    7.30    4.10
  -4  13  -1   13.90    4.20
  -5 -13  -1   60.09    8.50
   5 -13   1   48.90    6.60
  -5  13  -1   57.09   10.10
  -5  13  -1   73.29   11.20
   5  13   1   36.80    7.10
 -16   0   2   33.10    7.00
 -16   0   2   28.00    4.00
 -15   0   2   -0.20    1.80
 -15   0   2    0.20    1.20
 -14   0   2   81.29    9.70
 -14   0   2   71.79    5.40
 -13   0   2    1.30    1.20
 -12   0   2    2.40    1.70
 -12   0   2    5.40    2.80
  12   0  -2    3.50    2.20
  12   0  -2    2.60    1.60
  11   0  -2   -0.30    1.10
 -11   0   2   -1.20    0.70
 -11   0   2    0.20    1.60
  11   0  -2    1.00    1.40
 -10   0   2   60.39    7.00
  10   0  -2   65.29    4.60
  10   0  -2   76.49    6.20
 -10   0   2   68.19    4.50
  -9   0   2    2.20    1.20
   9   0  -2    0.90    0.90
   9   0  -2    0.30    0.90
  -9   0   2    0.30    1.20
   8   0  -2  754.82   22.80
  -8   0   2  724.03   20.10
  -8   0   2  738.03   25.60
  -8   0   2  675.23   22.70
   8   0  -2  689.63   20.20
   7   0  -2    0.50    0.80
  -7   0   2    1.70    0.80
  -7   0   2    2.90    1.50
   7   0  -2    0.90    0.70
  -6   0   2 2012.70   62.39
   6   0  -2 1858.21   61.19
  -6   0   2 1914.61   61.39
  -6   0   2 1953.70   53.19
   6   0  -2 1904.31   53.39
  -5   0   2   -0.20    0.30
   5   0  -2    1.30    0.60
   5   0  -2    0.20    0.30
   5   0  -2    0.20    0.60
  -5   0   2    1.80    1.00
  -4   0   2   90.49    3.50
   4   0  -2   76.79    4.30
  -4   0   2   83.39    4.50
   4   0  -2   85.59    3.50
   3   0  -2    0.40    0.60
   3   0  -2   -0.10    0.30
  -3   0   2    0.20    0.50
  -3   0   2    0.80    0.40
   2   0  -2  170.08    4.80
  -2   0   2  163.78    5.60
  -2   0   2  165.58    4.80
   1   0  -2    0.50    0.20
   1   0  -2    0.10    0.10
   1   0  -2    0.90    0.30
  -1   0   2    0.30    0.30
  -1   0  -2    0.50    0.20
   1   0   2    0.70    0.30
  -1   0  -2    0.20    0.20
   1   0   2    0.10    0.20
   2   0   2  893.21   26.50
  -2   0  -2  937.31   26.70
   2   0   2  929.01   25.20
  -2   0  -2  926.91   25.20
   3   0   2   -0.20    0.40
   3   0   2    1.70    0.60
  -3   0  -2   -0.40    0.30
  -3   0  -2    0.60    0.40
  -4   0  -2  367.86   10.40
   4   0   2  359.26   11.00
   4   0   2  351.96   11.30
  -4   0  -2  362.36   11.50
   5   0   2    0.00    0.40
   5   0   2    0.70    0.80
  -5   0  -2   -0.20    0.70
  -5   0  -2    1.40    0.70
  -6   0  -2  550.94   17.20
  -6   0  -2  528.75   15.30
   6   0   2  513.15   16.80
   6   0   2  546.85   15.40
   7   0   2   -0.50    0.70
  -7   0  -2    0.40    0.80
  -7   0  -2    0.00    0.90
   7   0   2    0.20    0.80
   7   0   2   -0.30    0.50
   8   0   2   20.40    2.80
   8   0   2   25.30    3.80
   8   0   2   41.70    5.30
  -8   0  -2   18.90    3.60
  -8   0  -2   28.70    3.30
  -9   0  -2   -0.60    1.30
   9   0   2    1.00    1.00
  -9   0  -2    0.20    0.60
   9   0   2    0.00    0.80
  10   0   2  464.85   15.60
 -10   0  -2  459.55   18.30
  10   0   2  475.75   18.60
 -10   0  -2  473.75   15.50
  11   0   2   -1.50    0.80
 -11   0  -2   -1.70    1.20
  11   0   2    2.60    1.40
  12   0   2   33.30    6.10
 -12   0  -2   33.10    4.30
 -12   0  -2   21.40    4.60
 -13   0  -2    1.40    1.30
  13   0   2    0.00    1.10
 -13   0  -2   -0.90    1.70
 -14   0  -2   57.89    4.90
 -14   0  -2   53.49    7.80
 -15   0  -2   -1.90    1.40
 -15   0  -2    0.90    1.40
 -16   0  -2   -0.40    2.20
 -16   0  -2    0.80    1.20
 -16  -1   2   92.19   11.70
 -16   1   2  102.49    7.10
 -16   1   2   84.99   10.50
 -15  -1   2   92.69    5.60
 -15  -1   2   96.29   11.10
 -15   1   2  106.19    7.10
 -15   1   2   94.49   10.80
 -14  -1   2  150.38   11.50
 -14   1   2  141.79    8.20
 -14   1   2  146.49   11.30
  13  -1  -2    0.50    1.80
 -13  -1   2    1.40    1.20
 -13  -1   2    2.80    2.20
 -13   1   2   -0.10    1.70
  13   1  -2    1.10    1.10
  13   1  -2    1.10    1.60
 -13   1   2    1.50    1.60
 -12  -1   2    9.90    2.20
 -12  -1   2   12.60    3.80
  12  -1  -2   11.00    3.30
  12   1  -2    9.10    2.20
  12   1  -2   16.70    4.20
 -12   1   2   19.60    4.90
 -12   1   2   15.60    3.30
  11  -1  -2    5.30    2.70
 -11  -1   2   10.00    2.00
 -11  -1   2    7.20    2.80
  11   1  -2   11.10    3.20
  11   1  -2    8.70    1.90
 -11   1   2    6.80    2.20
 -11   1   2    5.30    2.60
 -10  -1   2   99.29    7.80
  10  -1  -2   96.39    6.00
  10  -1  -2   99.09    7.20
 -10  -1   2   91.19    4.80
 -10   1   2   88.29    5.60
  10   1  -2   89.09    4.90
 -10   1   2  104.59    7.70
  10   1  -2   91.39    6.80
   9  -1  -2  543.95   19.40
  -9  -1   2  543.75   20.10
  -9  -1   2  534.75   15.50
   9   1  -2  552.34   19.10
  -9   1   2  549.54   17.00
   9   1  -2  515.05   15.70
  -9   1   2  530.65   19.50
  -8  -1   2  491.65   17.60
   8  -1  -2  427.86   14.40
  -8  -1   2  437.66   12.90
   8  -1  -2  460.75   16.40
  -8   1   2  469.35   16.70
  -8   1   2  463.95   14.50
   8   1  -2  403.16   16.70
   8   1  -2  425.96   13.10
  -8   1   2  433.46   16.10
  -7  -1   2  537.35   18.50
   7  -1  -2  509.55   16.00
  -7  -1   2  528.15   14.50
   7  -1  -2  541.95   17.70
  -7   1   2  545.35   16.00
   7   1  -2  522.35   14.70
  -7   1   2  521.95   17.80
  -7   1   2  532.55   17.70
   7   1  -2  507.85   17.90
  -6  -1   2  583.74   15.80
  -6  -1   2  629.94   19.70
   6  -1  -2  603.74   18.70
   6  -1  -2  599.94   17.50
  -6   1   2  598.54   18.80
   6   1  -2  615.04   19.40
  -6   1   2  623.74   17.40
  -6   1   2  619.04   19.10
   6   1  -2  610.04   16.10
  -5  -1   2  193.78    8.40
   5  -1  -2  203.48    7.30
   5  -1  -2  200.28    8.00
   5   1  -2  184.78    8.20
   5   1  -2  189.18    6.00
  -5   1   2  203.48    8.10
  -5   1   2  212.88    7.30
  -5   1   2  197.18    8.20
  -4  -1   2   93.69    3.20
   4  -1  -2   99.49    4.30
   4  -1  -2   96.49    4.70
  -4  -1   2   91.09    4.90
  -4   1   2   97.29    4.80
  -4   1   2  105.39    4.90
  -4   1   2   95.99    4.20
   4   1  -2   94.69    5.00
  -4   1   2   94.09    4.60
   4   1  -2   96.39    3.30
   3  -1  -2    0.90    0.60
   3  -1  -2    0.50    0.50
  -3  -1   2    0.90    0.60
  -3  -1   2    0.70    0.30
   3   1  -2    0.70    0.30
  -3   1   2    2.10    0.70
  -3   1   2    0.80    0.60
  -3   1   2    0.80    0.50
   3   1  -2    3.10    1.10
  -2  -1   2   40.10    1.20
  -2  -1   2   40.90    2.40
   2  -1  -2   42.20    2.20
   2  -1  -2   38.20    2.20
  -2  -1   2   41.10    1.20
  -2   1   2   41.30    2.30
   2   1  -2   34.50    2.20
  -2   1   2   37.80    2.20
  -2   1   2   41.30    2.10
   1  -1  -2   93.29    3.30
   1  -1  -2   91.59    3.30
  -1  -1   2   92.79    2.60
  -1  -1   2   87.69    3.30
   1   1  -2   93.89    3.30
  -1   1   2   95.59    3.40
   1   1  -2   90.59    2.50
  -1   1   2   91.49    3.40
  -1   1   2   89.49    3.20
   0  -1  -2   19.40    1.10
   0  -1   2   18.00    1.00
   0  -1  -2   17.70    1.20
   0  -1   2   19.60    1.20
   0   1   2   23.80    1.30
   0   1  -2   17.00    1.10
   0   1  -2   17.40    0.90
   0   1  -2   19.00    1.00
   0   1   2   17.90    1.10
   1  -1   2    4.40    0.40
   1  -1   2    3.10    0.60
  -1  -1  -2    3.90    0.70
  -1  -1  -2    4.20    0.60
   1  -1   2    3.20    0.70
   1   1   2    3.80    0.60
   1   1   2    4.20    0.70
  -1   1  -2    3.50    0.70
  -1   1  -2    5.30    0.40
  -1   1  -2    5.10    0.80
  -2  -1  -2   89.99    3.90
  -2  -1  -2   98.79    3.10
   2  -1   2   95.89    4.00
   2  -1   2   99.39    3.70
  -2   1  -2   94.09    3.30
   2   1   2   99.79    3.10
   2   1   2   90.59    3.90
  -2   1  -2   94.29    3.30
  -2   1  -2   91.49    3.90
  -2   1  -2   96.59    3.70
  -3  -1  -2 1584.24   40.20
   3  -1   2 1587.64   43.20
  -3  -1  -2 1532.45   45.70
  -3   1  -2 1538.15   43.10
   3   1   2 1585.34   46.10
  -3   1  -2 1571.54   43.10
  -3   1  -2 1577.64   43.30
   3   1   2 1573.94   40.10
  -4  -1  -2    9.80    1.30
   4  -1   2   10.50    1.70
  -4  -1  -2   11.70    2.10
   4  -1   2    8.40    1.40
  -4   1  -2    9.70    1.50
  -4   1  -2   11.60    1.80
   4   1   2   14.70    1.20
  -4   1  -2   11.00    1.80
   4   1   2   14.20    2.20
   5  -1   2  781.32   21.00
  -5   1  -2  781.72   21.50
   5   1   2  743.63   22.00
  -5   1  -2  781.52   21.60
  -6  -1  -2  520.75   14.30
   6  -1   2  508.65   16.20
  -6  -1  -2  524.65   17.00
   6  -1   2  501.35   15.40
   6  -1   2  519.55   17.10
  -6   1  -2  531.95   16.40
   6   1   2  508.45   16.70
   6   1   2  501.95   14.20
  -6   1  -2  515.95   15.40
  -6   1  -2  509.55   16.10
  -7  -1  -2  121.99    7.10
  -7  -1  -2  112.69    5.00
   7  -1   2  123.39    6.00
   7  -1   2  125.39    7.20
   7   1   2  118.69    5.10
  -7   1  -2  122.69    5.90
  -7   1  -2  112.09    6.30
  -7   1  -2  122.19    6.70
   8  -1   2    6.70    2.40
  -8  -1  -2    7.40    1.60
   8  -1   2   10.60    2.40
   8   1   2    5.50    2.10
  -8   1  -2    7.00    1.90
   8   1   2    6.00    1.50
  -8   1  -2    6.10    2.00
  -8   1  -2    6.60    2.10
  -9  -1  -2   84.69    6.60
   9  -1   2   78.69    5.20
  -9  -1  -2   75.79    4.40
   9  -1   2   85.09    6.60
  -9   1  -2   82.49    6.30
  -9   1  -2   81.29    6.70
   9   1   2   81.69    4.60
  -9   1  -2   68.49    4.90
 -10  -1  -2   51.49    3.80
 -10  -1  -2   67.69    7.40
  10  -1   2   78.89    6.70
  10  -1   2   61.19    4.70
 -10   1  -2   49.60    4.30
 -10   1  -2   69.39    7.30
  10   1   2   68.49    4.30
  10   1   2   52.99    6.70
 -11  -1  -2  492.95   19.90
 -11  -1  -2  464.45   15.40
  11  -1   2  483.05   20.00
  11   1   2  498.85   19.80
 -11   1  -2  514.75   19.80
 -11   1  -2  477.25   16.80
 -12  -1  -2   95.89    9.90
 -12  -1  -2   79.69    5.10
  12  -1   2   80.59    9.30
 -12   1  -2   87.29    6.10
 -12   1  -2   87.89    7.70
  12   1   2   95.19   10.40
  12   1   2   84.39    5.40
  13  -1   2  175.18   12.10
 -13  -1  -2  167.28    8.10
  13   1   2  170.28   11.60
 -13   1  -2  183.68   11.70
  13   1   2  177.28   10.00
 -13   1  -2  176.08    9.20
 -14  -1  -2  123.89    6.80
 -14  -1  -2  116.19   10.00
 -14   1  -2  134.59    8.10
 -14   1  -2  115.69    9.70
 -15  -1  -2   14.00    2.70
 -15  -1  -2   11.10    4.00
 -15   1  -2   14.20    3.50
 -15   1  -2   13.70    4.40
 -16  -1  -2    0.20    2.20
 -16   1  -2    1.80    1.60
 -16   1  -2    2.30    2.30
 -16  -2   2   31.30    9.30
 -16   2   2   26.20    4.60
 -16   2   2   41.90    7.40
 -15  -2   2   37.30    7.40
 -15   2   2   45.10    6.40
 -15   2   2   45.00    7.40
 -14  -2   2   94.29    4.70
 -14  -2   2   80.89    9.80
 -14   2   2   93.49   10.40
 -14   2   2  103.29    7.20
 -13  -2   2  139.99   10.80
 -13  -2   2  130.99    5.80
  13  -2  -2  134.59   10.40
 -13   2   2  136.59   10.50
  13   2  -2  137.59    6.10
  13   2  -2  145.79   10.10
 -13   2   2  143.69    8.40
  12  -2  -2  154.88   10.60
 -12  -2   2  176.68   11.60
 -12  -2   2  153.58    6.20
  12   2  -2  154.58    6.40
  12   2  -2  155.68   10.10
 -12   2   2  134.49    8.20
 -12   2   2  160.38   10.70
 -11  -2   2    9.00    1.60
  11  -2  -2   12.70    3.90
 -11  -2   2    7.20    3.00
 -11   2   2    6.70    2.20
 -11   2   2   12.60    3.50
  11   2  -2    8.10    1.60
  10  -2  -2  207.58   12.60
 -10  -2   2  222.08    7.30
 -10  -2   2  203.08   11.70
 -10   2   2  205.88    9.50
 -10   2   2  213.28   11.20
  10   2  -2  202.58    7.30
   9  -2  -2  182.58    8.80
  -9  -2   2  206.08   10.90
  -9  -2   2  169.88    6.10
   9  -2  -2  179.58   10.00
  -9   2   2  171.78    9.60
   9   2  -2  187.58    6.40
  -8  -2   2  588.74   20.90
   8  -2  -2  606.74   20.50
   8  -2  -2  574.74   18.60
  -8  -2   2  580.84   15.50
  -8   2   2  600.14   19.90
   8   2  -2  595.54   15.80
  -8   2   2  608.94   20.20
  -8   2   2  588.14   18.50
   7  -2  -2  847.72   25.20
  -7  -2   2  811.82   22.10
  -7  -2   2  838.02   25.70
   7  -2  -2  784.32   23.30
  -7   2   2  795.42   23.20
   7   2  -2  832.32   20.40
   7   2  -2  793.72   25.20
  -7   2   2  801.02   24.40
  -7   2   2  835.82   24.90
  -6  -2   2 2057.19   51.69
  -6  -2   2 2083.99   68.19
   6  -2  -2 2103.79   62.09
   6   2  -2 2039.00   51.89
   6   2  -2 2109.09   67.89
  -6   2   2 2128.89   65.09
  -6   2   2 2082.29   61.29
  -6   2   2 2235.08   66.89
  -5  -2   2 1974.70   47.60
   5  -2  -2 2016.40   57.99
   5  -2  -2 1964.10   60.29
  -5  -2   2 1968.70   62.79
   5   2  -2 2001.20   47.70
  -5   2   2 1991.30   59.69
  -5   2   2 2028.80   60.99
   5   2  -2 1974.90   62.59
  -5   2   2 1975.70   57.29
   4  -2  -2   86.29    4.60
   4  -2  -2   93.99    4.60
  -4  -2   2   90.89    5.10
   4  -2  -2   87.39    4.80
  -4   2   2   95.99    4.90
  -4   2   2   98.19    4.60
  -4   2   2   90.39    4.60
   4   2  -2   80.89    4.80
   3  -2  -2  355.46   11.50
  -3  -2   2  348.67   11.50
   3  -2  -2  370.16   11.00
   3  -2  -2  368.46   11.10
  -3   2   2  365.86   10.90
  -3   2   2  347.47   11.30
   3   2  -2  358.26   11.50
  -3   2   2  356.76   10.90
  -2  -2   2  323.77    9.90
   2  -2  -2  322.07    9.60
  -2  -2   2  313.87    7.70
   2  -2  -2  309.87   10.10
   2  -2  -2  318.67    9.60
  -2   2   2  317.07   10.00
  -2   2   2  329.47    9.60
   1  -2  -2 1552.84   42.20
   1  -2  -2 1533.95   41.70
  -1  -2   2 1537.65   38.50
   1   2  -2 1566.44   42.20
  -1   2   2 1526.35   42.00
  -1   2   2 1515.15   41.60
   1   2  -2 1558.54   38.50
   0  -2   2 1312.67   34.60
   0  -2  -2 1413.16   35.80
   0  -2   2 1313.67   34.80
   0  -2  -2 1276.67   36.80
   0   2  -2 1324.97   35.00
   0   2  -2 1278.97   34.70
   0   2   2 1304.57   37.00
  -1  -2  -2 3687.83   87.19
   1  -2   2 3636.24   86.49
  -1  -2  -2 3592.04   90.99
   1  -2   2 3585.04   88.99
   1   2   2 3519.15   90.79
  -1   2  -2 3562.54   86.49
  -1   2  -2 3627.34   89.39
   1   2   2 3751.22   87.29
  -2  -2  -2 7865.21  186.08
   2  -2   2 7622.54  180.28
   2  -2   2 7544.25  183.28
  -2   2  -2 7653.13  183.68
   2   2   2 7619.44  185.78
  -2   2  -2 7705.43  180.18
   2   2   2 7696.63  179.18
   2   2   2 7703.43  178.98
  -3  -2  -2 4814.82  123.59
  -3  -2  -2 4894.51  114.39
   3  -2   2 4855.91  118.09
   3  -2   2 4826.92  120.29
   3   2   2 4871.91  114.29
  -3   2  -2 4820.72  120.49
  -3   2  -2 4883.61  117.69
   3   2   2 4729.73  123.19
  -4  -2  -2   64.19    4.20
   4  -2   2   67.19    3.80
  -4  -2  -2   64.59    2.60
  -4   2  -2   71.89    3.70
  -4   2  -2   70.19    3.60
  -4   2  -2   63.29    4.10
   4   2   2   66.79    2.60
  -4   2  -2   64.79    3.80
   4   2   2   66.39    4.30
   5  -2   2 1100.29   30.70
  -5   2  -2 1116.09   28.90
   5   2   2 1085.69   30.40
   6  -2   2   86.49    5.70
  -6  -2  -2   86.49    5.60
  -6  -2  -2   78.09    3.40
   6  -2   2   74.59    4.60
  -6   2  -2   79.39    4.70
  -6   2  -2   72.49    4.50
  -6   2  -2   78.79    4.80
   6   2   2   75.19    3.40
   6   2   2   74.89    5.30
   7  -2   2  177.18    9.00
  -7  -2  -2  171.78    8.80
  -7  -2  -2  163.38    5.90
   7  -2   2  163.58    8.20
  -7   2  -2  175.78    8.10
  -7   2  -2  159.98    7.50
  -7   2  -2  161.38    7.70
   7   2   2  167.78    5.90
   7   2   2  155.08    8.40
  -8  -2  -2  338.47   10.50
  -8  -2  -2  352.56   14.50
   8  -2   2  340.77   12.80
   8  -2   2  345.67   14.50
  -8   2  -2  368.86   13.00
  -8   2  -2  341.67   14.40
  -8   2  -2  371.16   13.70
   8   2   2  334.77   10.60
  -9  -2  -2  218.88   11.40
   9  -2   2  232.58   11.80
  -9  -2  -2  213.48    7.70
  -9   2  -2  217.48   10.30
   9   2   2  218.58    7.90
  -9   2  -2  220.28    9.80
 -10  -2  -2  683.73   19.40
  10  -2   2  682.03   24.90
 -10  -2  -2  748.73   25.30
  10   2   2  677.93   19.60
 -10   2  -2  708.53   23.90
 -10   2  -2  699.73   22.20
 -11  -2  -2  340.07   11.60
 -11  -2  -2  355.46   16.60
  11  -2   2  381.36   17.40
  11   2   2  354.56   12.00
 -11   2  -2  381.76   14.50
 -11   2  -2  355.66   15.80
 -12  -2  -2    0.80    0.80
 -12  -2  -2    0.30    1.80
  12  -2   2    1.60    2.30
  12   2   2    1.10    1.30
 -12   2  -2    1.90    1.70
 -12   2  -2    1.50    2.10
  12   2   2    0.40    0.90
 -13  -2  -2  144.79    6.70
 -13  -2  -2  163.18   11.50
  13  -2   2  139.59   11.00
  13   2   2  154.08   10.90
  13   2   2  152.58    7.10
 -13   2  -2  156.88   10.60
 -13   2  -2  141.29    8.70
 -14  -2  -2   47.90    7.60
 -14  -2  -2   50.39    3.80
 -14   2  -2   46.20    7.00
 -14   2  -2   39.80    5.50
 -15  -2  -2    5.50    1.70
 -15  -2  -2    7.40    3.60
 -15   2  -2    7.10    3.40
 -15   2  -2    6.40    2.40
 -15  -3   2   23.70    5.90
 -15   3   2   17.70    4.10
 -15   3   2   14.20    4.50
 -14  -3   2   17.40    5.10
 -14   3   2   17.60    5.00
 -13  -3   2   54.99    8.70
  13  -3  -2   53.19    8.00
 -13   3   2   50.29    7.60
 -13   3   2   45.50    5.90
  13   3  -2   51.19    7.70
 -12  -3   2    3.20    0.70
  12  -3  -2    1.40    1.60
 -12   3   2    0.50    1.90
 -12   3   2    0.70    1.50
  11  -3  -2   61.69    7.30
 -11  -3   2   84.69    9.60
 -11  -3   2   62.99    2.50
 -11   3   2   75.99    6.00
  11   3  -2   62.99    2.30
 -11   3   2   80.79    8.70
  10  -3  -2    1.00    1.50
 -10  -3   2   -0.50    1.30
 -10  -3   2    0.90    0.40
 -10   3   2   -1.20    1.00
  10   3  -2    1.10    0.40
 -10   3   2   -0.40    1.10
   9  -3  -2  941.71   30.30
  -9  -3   2  986.40   30.90
  -9  -3   2  911.41   22.20
  -9   3   2  949.11   29.30
   9   3  -2  893.91   22.00
  -9   3   2  979.20   28.10
   8  -3  -2   64.19    5.10
   8  -3  -2   74.79    7.90
  -8  -3   2   72.39    6.10
  -8   3   2   60.99    5.30
  -8   3   2   66.59    5.00
  -8   3   2   60.39    5.00
  -7  -3   2    0.90    1.40
   7  -3  -2    0.00    0.80
  -7   3   2    1.30    1.40
  -7   3   2    0.50    0.90
   7   3  -2   -0.10    0.70
  -7   3   2    2.80    1.40
   6  -3  -2   52.09    4.20
  -6  -3   2   56.99    4.80
   6  -3  -2   53.89    4.60
   6  -3  -2   51.99    4.10
  -6   3   2   60.79    4.30
  -6   3   2   51.59    4.30
   6   3  -2   51.59    5.60
  -6   3   2   56.49    4.20
   5  -3  -2 1299.97   36.00
   5  -3  -2 1304.67   34.90
  -5  -3   2 1332.27   36.20
  -5   3   2 1305.27   34.60
   5   3  -2 1365.86   36.30
   4  -3  -2    8.50    1.80
  -4  -3   2    5.50    1.60
   4  -3  -2    7.00    1.70
   4  -3  -2    5.90    1.70
   4   3  -2    3.00    1.40
  -4   3   2    5.40    1.30
  -4   3   2    5.50    1.40
  -4   3   2    4.50    1.20
   3  -3  -2  695.63   20.90
   3  -3  -2  728.03   20.10
  -3   3   2  720.63   20.80
  -3   3   2  742.73   19.80
   3   3  -2  715.93   20.60
   2  -3  -2  115.29    4.90
  -2  -3   2  115.39    3.60
   2  -3  -2  106.69    5.50
  -2  -3   2  105.09    5.00
   2  -3  -2  107.49    4.90
   2   3  -2  111.09    5.10
  -2   3   2  113.59    5.50
  -2   3   2  108.39    4.80
   2   3  -2  111.39    3.60
  -2   3   2  117.69    5.00
  -1  -3   2 2544.65   66.99
  -1  -3   2 2590.34   63.39
   1  -3  -2 2573.44   67.69
   1  -3  -2 2505.65   66.69
  -1   3   2 2519.15   66.79
   1   3  -2 2409.46   69.59
  -1   3   2 2578.84   67.69
   0  -3   2  186.28    7.30
   0  -3  -2  171.68    6.10
   0  -3  -2  177.38    6.50
   0  -3   2  181.38    5.90
   0  -3   2  173.68    6.40
   0   3  -2  185.88    7.20
   0   3   2  175.78    6.10
   0   3  -2  174.78    6.00
   0   3   2  177.08    7.30
   0   3   2  169.28    6.40
   0   3  -2  179.18    6.00
  -1  -3  -2  801.42   24.10
   1  -3   2  785.92   25.90
   1  -3   2  795.82   25.80
  -1  -3  -2  811.22   28.00
   1   3   2  796.02   27.90
  -1   3  -2  743.23   25.60
   1   3   2  827.72   24.50
  -1   3  -2  814.02   24.50
   2  -3   2   43.10    3.00
   2  -3   2   52.29    3.70
   2  -3   2   52.39    2.60
  -2  -3  -2   49.60    2.40
  -2  -3  -2   48.60    3.30
  -2   3  -2   50.69    3.20
   2   3   2   48.70    3.30
  -2   3  -2   50.89    2.50
  -3  -3  -2 2926.51   81.09
   3  -3   2 2851.91   74.49
   3  -3   2 2889.11   77.99
  -3   3  -2 2919.61   74.29
   3   3   2 2879.21   70.69
   3   3   2 2864.01   80.69
   3   3   2 2874.01   70.89
  -3   3  -2 2961.20   78.29
   4  -3   2  112.89    5.60
   4  -3   2  124.39    5.20
   4  -3   2  116.09    6.40
  -4  -3  -2   98.89    5.80
   4   3   2  124.89    3.90
  -4   3  -2  113.99    4.90
  -4   3  -2  117.79    5.70
   4   3   2  121.39    3.90
   4   3   2  114.79    6.10
  -5  -3  -2  182.58    5.50
   5  -3   2  184.08    8.70
   5  -3   2  182.48    7.80
  -5  -3  -2  183.28    8.60
  -5   3  -2  174.88    8.40
  -5   3  -2  185.48    7.20
  -5   3  -2  180.08    7.30
   5   3   2  175.98    8.40
  -5   3  -2  193.58    8.00
   5   3   2  188.78    5.50
  -6  -3  -2    2.30    1.50
   6  -3   2    1.90    1.90
   6  -3   2    1.70    1.30
  -6   3  -2    2.30    1.20
   6   3   2    3.20    1.40
  -6   3  -2    1.30    1.10
  -6   3  -2    3.80    1.30
   6   3   2    2.70    0.70
  -6   3  -2    1.60    1.30
  -7  -3  -2  455.35   12.20
   7  -3   2  449.16   15.50
   7  -3   2  445.76   17.00
  -7  -3  -2  488.65   17.30
  -7   3  -2  441.36   15.20
  -7   3  -2  456.35   15.00
   7   3   2  443.16   12.10
   7   3   2  423.76   16.60
  -7   3  -2  466.15   15.60
  -8  -3  -2  112.79    7.60
  -8  -3  -2   98.89    4.00
   8  -3   2   96.89    7.20
  -8   3  -2  108.19    6.50
  -8   3  -2  109.69    6.50
   8   3   2   92.19    5.50
   9  -3   2  494.65   19.70
  -9  -3  -2  514.55   13.80
  -9  -3  -2  478.55   19.20
  -9   3  -2  499.65   17.50
   9   3   2  471.75   13.60
  -9   3  -2  497.95   17.50
  -9   3  -2  516.95   19.70
 -10  -3  -2   16.10    4.10
  10  -3   2   13.00    3.20
 -10  -3  -2   17.30    2.10
 -10   3  -2   15.90    3.40
  10   3   2   16.70    2.10
 -10   3  -2   20.40    3.90
 -11  -3  -2  129.89    5.30
  11  -3   2  133.59    9.90
 -11  -3  -2  112.99    9.10
 -11   3  -2  145.49    8.50
 -11   3  -2  133.49    8.90
  11   3   2  120.89    5.20
  12  -3   2   33.20    6.30
 -12  -3  -2   38.20    2.80
 -12  -3  -2   35.00    7.00
 -12   3  -2   43.30    5.80
  12   3   2   36.00    2.70
 -12   3  -2   41.30    6.40
 -13  -3  -2    5.20    1.30
 -13  -3  -2    3.50    2.90
  13   3   2    6.50    1.40
 -13   3  -2    3.70    2.10
 -13   3  -2    6.00    2.90
 -14  -3  -2   37.90    7.20
 -14  -3  -2   34.70    2.40
 -14   3  -2   46.60    7.30
 -14   3  -2   41.20    5.90
 -15  -3  -2    0.40    2.00
 -15   3  -2    1.00    1.70
 -15   3  -2   -2.30    1.10
 -15  -4   2    8.90    4.90
 -15   4   2   -0.70    1.80
 -15   4   2    3.20    2.20
 -14  -4   2    4.50    3.10
 -14   4   2    3.10    2.20
 -14   4   2    5.00    2.30
 -13  -4   2   10.30    4.30
 -13   4   2    2.10    2.60
 -13   4   2    3.00    4.00
 -12  -4   2   17.80    4.90
  12  -4  -2   17.70    4.90
 -12   4   2   15.60    3.90
 -12   4   2   15.90    4.10
  11  -4  -2    8.50    2.90
 -11  -4   2   17.40    4.60
 -11   4   2    8.10    2.70
 -11   4   2    7.40    2.70
 -10  -4   2  319.07   15.50
  10  -4  -2  302.57   15.20
 -10   4   2  306.97   14.10
 -10   4   2  288.87   13.00
   9  -4  -2    2.50    2.00
  -9  -4   2    2.50    2.10
  -9   4   2   -0.80    1.10
  -9   4   2    2.70    1.70
   8  -4  -2    3.20    1.90
  -8  -4   2    1.20    1.70
  -8   4   2    1.40    1.50
  -8   4   2    2.80    1.70
  -8   4   2    4.30    1.90
   7  -4  -2   29.10    4.40
   7  -4  -2   46.20    5.40
  -7  -4   2   37.30    5.10
  -7   4   2   31.00    4.10
  -7   4   2   41.50    5.60
  -7   4   2   33.50    4.30
   6  -4  -2   28.40    3.90
   6  -4  -2   34.10    5.10
   6  -4  -2   30.40    4.20
  -6   4   2   37.60    5.00
   6   4  -2   28.40    4.40
  -6   4   2   29.20    4.00
  -6   4   2   39.60    4.40
   5  -4  -2  110.59    6.90
   5  -4  -2   96.39    5.90
  -5  -4   2  111.49    6.70
   5  -4  -2  119.79    6.20
  -5   4   2  112.89    6.20
   5   4  -2  101.49    7.30
  -5   4   2  112.39    5.80
   4  -4  -2 1505.15   39.50
  -4   4   2 1514.25   38.80
   4   4  -2 1507.35   40.30
  -3  -4   2   80.69    4.80
   3  -4  -2   68.39    4.90
  -3  -4   2   78.19    2.90
   3  -4  -2   77.09    4.60
   3  -4  -2   80.49    4.40
  -3   4   2   82.99    5.20
   3   4  -2   79.59    2.90
  -3   4   2   74.49    4.50
   3   4  -2   77.69    4.80
  -3   4   2   74.89    4.30
   2  -4  -2   87.79    4.60
  -2  -4   2   92.49    4.80
   2  -4  -2   80.79    4.60
  -2  -4   2   89.49    3.50
  -2   4   2   86.79    4.50
   2   4  -2   83.89    5.30
   2   4  -2   82.49    4.70
  -2   4   2   89.39    5.40
   2   4  -2   87.59    3.50
  -2   4   2   93.79    4.80
  -1  -4   2   20.00    2.10
   1  -4  -2   21.50    2.50
   1  -4  -2   27.90    3.90
  -1  -4   2   17.60    2.30
   1  -4  -2   17.90    2.40
  -1   4   2   18.50    2.70
   1   4  -2   20.70    1.80
  -1   4   2   24.50    2.80
   1   4  -2   17.80    2.50
  -1   4   2   26.20    2.90
   1   4  -2   18.10    2.40
   0  -4   2   45.10    2.80
   0  -4  -2   40.90    2.70
   0  -4   2   39.40    2.60
   0  -4  -2   39.10    3.00
   0  -4   2   40.10    3.50
   0   4   2   32.00    4.00
   0   4   2   38.90    3.00
   0   4  -2   49.70    5.00
   0   4  -2   33.50    2.50
   0   4   2   40.20    2.70
   0   4  -2   38.90    2.70
   1  -4   2    0.30    0.60
   1  -4   2   -1.00    0.70
  -1  -4  -2    0.30    0.60
   1  -4   2    1.50    1.70
  -1  -4  -2    0.50    0.80
   1   4   2   -0.10    0.60
  -1   4  -2    1.30    0.70
   1   4   2   -0.30    0.70
  -1   4  -2   -1.10    0.80
   1   4   2    0.60    1.10
  -1   4  -2    0.90    1.00
  -2  -4  -2   22.80    2.90
   2  -4   2   33.20    4.20
   2  -4   2   35.00    3.50
   2  -4   2   26.80    2.10
   2   4   2   22.30    2.90
  -2   4  -2   29.10    3.70
  -2   4  -2   23.40    2.00
  -2   4  -2   23.40    2.90
   2   4   2   24.00    1.90
   3  -4   2  192.98    9.00
  -3  -4  -2  210.38    8.70
   3  -4   2  200.18    7.20
   3  -4   2  211.08    8.30
   3   4   2  201.28    6.30
   3   4   2  204.08    6.50
  -3   4  -2  207.38    8.30
  -3   4  -2  204.98    9.00
  -3   4  -2  197.78    7.00
   3   4   2  196.48    8.60
  -4  -4  -2 3605.64  102.89
   4  -4   2 3680.53   99.19
   4  -4   2 3617.04   94.99
  -4   4  -2 3685.43   94.39
   4   4   2 3649.33  103.39
  -4   4  -2 3598.54   98.99
   4   4   2 3639.74   88.29
  -5  -4  -2   41.70    4.90
   5  -4   2   49.50    4.00
   5  -4   2   40.70    4.70
   5  -4   2   52.29    3.60
   5   4   2   49.50    2.20
  -5   4  -2   54.19    4.20
  -5   4  -2   49.10    4.40
  -5   4  -2   52.29    3.40
   5   4   2   57.59    4.80
   5   4   2   48.20    2.20
   6  -4   2   84.09    7.50
   6  -4   2   52.99    4.50
  -6  -4  -2   68.99    7.70
  -6   4  -2   54.29    4.90
   6   4   2   60.99    2.40
  -6   4  -2   60.19    4.00
   6   4   2   60.59    2.50
  -6   4  -2   67.49    4.40
   6   4   2   63.79    5.30
  -7  -4  -2    2.80    1.90
   7  -4   2    3.70    1.70
  -7   4  -2    3.20    1.30
  -7   4  -2    2.00    1.60
   7   4   2    2.50    0.60
  -7   4  -2    4.80    1.80
   7   4   2    4.30    0.70
  -7   4  -2    2.90    1.90
   8  -4   2  124.19    8.50
  -8  -4  -2  121.99    8.30
   8   4   2  119.49    3.70
  -8   4  -2  112.89    6.80
  -8   4  -2  119.09    7.30
  -8   4  -2  118.29    7.50
   8   4   2  116.09    3.70
  -8   4  -2  112.09    7.80
   9  -4   2    5.50    2.90
  -9  -4  -2    1.50    2.00
  -9   4  -2    2.30    1.60
  -9   4  -2   -0.10    1.30
   9   4   2    0.90    0.50
   9   4   2    0.40    0.40
 -10  -4  -2    0.60    1.70
  10  -4   2    1.00    1.70
  10   4   2    1.50    0.40
 -10   4  -2    1.40    1.40
  10   4   2    2.40    0.50
 -10   4  -2    0.30    1.40
 -11  -4  -2   16.80    4.50
  11  -4   2   19.10    4.80
 -11   4  -2   27.40    4.80
 -11   4  -2   23.30    4.40
 -12  -4  -2  258.97   14.80
  12  -4   2  281.17   20.30
 -12   4  -2  256.77   12.90
 -12   4  -2  254.77   13.30
 -13  -4  -2   -0.70    1.90
 -13   4  -2    5.60    2.50
 -13   4  -2    0.80    1.90
 -14  -4  -2   93.09   11.20
 -14   4  -2  116.29    9.30
 -14   4  -2  100.79    8.20
 -15  -4  -2   -1.60    1.90
 -15   4  -2    1.70    2.30
 -15   4  -2    0.00    1.90
 -15  -5   2  131.79   14.10
 -15   5   2  133.59   10.90
 -15   5   2  124.19    9.50
 -14  -5   2   71.79   10.10
 -14   5   2   62.49    7.50
 -14   5   2   82.89    9.80
 -13  -5   2   63.19    9.40
 -13   5   2   49.40    6.70
 -12  -5   2    0.30    2.00
  12  -5  -2    1.20    1.60
 -12   5   2   -0.20    1.70
 -12   5   2   -1.30    1.70
  11  -5  -2  108.49    9.40
 -11  -5   2  114.99   12.90
 -11   5   2  111.99    8.40
 -11   5   2  129.19    8.70
  10  -5  -2   18.00    4.60
 -10  -5   2   16.50    4.40
 -10   5   2   10.40    3.00
 -10   5   2   10.80    3.30
  -9  -5   2   -0.80    1.60
   9  -5  -2   -1.30    1.00
  -9   5   2    1.40    1.50
  -9   5   2   -0.10    0.90
  -9   5   2    1.80    1.80
   8  -5  -2    0.40    1.40
   8  -5  -2    0.20    1.60
  -8  -5   2    7.10    2.70
  -8   5   2   -0.30    1.30
  -8   5   2    0.50    1.40
  -8   5   2    0.90    1.40
  -7  -5   2  393.96   16.30
   7  -5  -2  416.56   17.10
   7  -5  -2  415.66   15.30
  -7   5   2  365.66   15.60
  -7   5   2  406.06   15.30
  -7   5   2  396.26   14.60
  -6  -5   2  347.37   14.40
   6  -5  -2  345.67   13.10
   6  -5  -2  358.46   15.10
  -6   5   2  343.57   13.40
  -6   5   2  337.17   14.30
   5  -5  -2  962.50   28.50
   5  -5  -2 1008.50   28.00
   5  -5  -2 1006.10   30.50
  -5  -5   2 1006.30   29.60
   5   5  -2  925.01   29.30
  -5   5   2  968.50   27.50
  -5   5   2  977.00   30.10
  -5   5   2 1016.80   29.90
  -4  -5   2    2.90    0.60
   4  -5  -2    0.30    1.00
   4  -5  -2    2.70    1.70
  -4  -5   2    1.00    1.30
   4  -5  -2    1.30    1.10
   4   5  -2    5.30    2.10
  -4   5   2    1.60    1.00
  -4   5   2    0.90    1.00
   4   5  -2    2.70    0.60
  -4   5   2    0.50    1.00
  -3  -5   2  626.64   16.40
  -3  -5   2  646.94   19.70
   3  -5  -2  622.24   21.00
   3  -5  -2  615.44   19.30
   3  -5  -2  599.94   18.60
  -3   5   2  613.34   19.10
  -3   5   2  665.63   20.90
  -3   5   2  631.34   18.70
   3   5  -2  642.54   16.40
   3   5  -2  642.74   21.10
   3   5  -2  612.24   19.60
   2  -5  -2   14.20    3.80
   2  -5  -2   12.90    2.30
  -2  -5   2   13.20    1.70
  -2  -5   2   12.10    2.20
   2  -5  -2   13.60    2.30
   2   5  -2   11.20    1.60
  -2   5   2   11.20    2.20
  -2   5   2   13.50    3.10
  -2   5   2   15.70    2.50
   2   5  -2   14.30    2.60
   2   5  -2    7.80    2.00
   1  -5  -2   -0.20    0.70
  -1  -5   2    0.60    0.80
  -1  -5   2    0.60    0.60
   1  -5  -2    0.90    0.80
   1  -5  -2    0.80    0.90
  -1   5   2    1.20    0.90
   1   5  -2    0.50    0.70
   1   5  -2    0.80    0.70
  -1   5   2    0.20    0.80
   1   5  -2   -0.50    0.60
  -1   5   2   -0.10    0.80
   0  -5   2  438.66   13.70
   0  -5  -2  445.36   13.90
   0  -5   2  471.95   16.40
   0  -5  -2  463.45   14.60
   0  -5   2  463.65   13.90
   0   5   2  475.85   16.40
   0   5  -2  439.86   13.70
   0   5   2  443.46   13.90
   0   5  -2  448.76   14.00
   0   5   2  447.76   14.50
   0   5  -2  442.76   15.70
  -1  -5  -2   10.40    1.80
   1  -5   2    7.20    2.30
   1  -5   2   10.20    2.00
   1  -5   2   10.50    1.90
  -1  -5  -2    9.80    2.10
   1   5   2   11.10    1.80
  -1   5  -2    7.10    1.70
  -1   5  -2   12.90    2.10
   1   5   2   13.20    2.50
   1   5   2   12.10    2.80
  -1   5  -2    7.90    2.30
  -2  -5  -2    1.50    0.70
   2  -5   2    1.80    1.40
   2  -5   2    1.60    0.80
  -2  -5  -2   -0.30    0.70
   2  -5   2    2.70    1.10
   2   5   2    3.40    2.50
  -2   5  -2    2.50    1.50
   2   5   2    2.70    1.00
  -2   5  -2    2.20    1.20
   2   5   2    1.90    1.20
  -2   5  -2    1.00    0.80
  -3  -5  -2  742.53   19.50
  -3  -5  -2  762.82   22.60
   3  -5   2  741.53   20.40
   3  -5   2  729.33   21.80
   3  -5   2  746.93   23.70
  -3   5  -2  745.63   23.30
  -3   5  -2  718.73   21.70
   3   5   2  708.53   22.50
  -3   5  -2  741.43   20.30
   3   5   2  761.12   19.60
   4  -5   2   61.09    5.40
   4  -5   2   59.09    3.80
   4  -5   2   50.29    4.30
  -4  -5  -2   66.09    5.10
   4   5   2   57.59    4.80
  -4   5  -2   59.69    3.70
  -4   5  -2   66.29    4.80
  -4   5  -2   68.89    5.40
   4   5   2   61.19    3.10
  -5  -5  -2  388.96   15.30
   5  -5   2  407.46   16.20
   5  -5   2  409.16   14.70
   5  -5   2  414.46   13.30
  -5   5  -2  404.66   15.60
   5   5   2  397.46   10.70
   5   5   2  355.96   14.90
  -5   5  -2  412.36   13.00
   5   5   2  411.66   11.70
  -5   5  -2  388.06   14.40
   6  -5   2    4.00    1.90
  -6  -5  -2    2.70    1.90
   6  -5   2    5.40    1.80
  -6   5  -2    2.70    1.50
   6   5   2    6.30    0.90
  -6   5  -2    3.90    1.90
   6   5   2    4.40    0.70
  -6   5  -2    3.70    1.30
  -7  -5  -2  148.69    9.20
   7  -5   2  146.19    9.50
  -7   5  -2  157.58    8.60
  -7   5  -2  148.99    7.20
  -7   5  -2  138.19    8.80
  -7   5  -2  144.49    7.50
   8  -5   2  281.67   14.10
  -8  -5  -2  263.07   13.30
  -8   5  -2  271.77   11.40
  -8   5  -2  243.08   12.60
  -8   5  -2  254.47   10.80
  -8   5  -2  267.67   12.10
   9  -5   2   77.49    9.20
  -9  -5  -2   53.69    7.00
  -9   5  -2   51.09    6.80
  -9   5  -2   60.69    6.40
  -9   5  -2   53.09    4.60
  -9   5  -2   62.19    6.70
 -10  -5  -2   95.39    9.90
 -10   5  -2   94.29    6.90
 -10   5  -2   84.39    7.00
 -11  -5  -2    8.90    3.30
  11  -5   2    3.50    2.50
 -11   5  -2    9.50    3.40
 -11   5  -2    7.50    2.60
  12  -5   2    7.40    3.80
 -12  -5  -2    0.70    2.30
 -12   5  -2    8.20    3.10
 -12   5  -2    7.90    2.80
 -13  -5  -2   40.60    7.30
 -13   5  -2   36.10    5.70
 -13   5  -2   32.90    5.50
 -14  -5  -2    2.60    2.80
 -14   5  -2    0.60    1.50
 -14   5  -2    0.10    1.30
 -14  -6   2    6.00    5.40
 -14   6   2   14.10    3.90
 -14   6   2    8.30    3.50
 -13  -6   2   27.50    6.50
 -13   6   2   24.20    5.10
 -13   6   2   20.30    4.70
 -12  -6   2   45.30    7.60
 -12   6   2   43.20    6.60
 -12   6   2   37.20    6.10
  11  -6  -2   74.69    9.60
 -11  -6   2   67.29    8.80
 -11   6   2   82.79    8.80
 -11   6   2   64.29    7.40
  10  -6  -2    1.20    1.70
 -10  -6   2    4.90    3.00
 -10   6   2    4.30    2.50
 -10   6   2    3.90    2.40
 -10   6   2    6.90    2.70
  -9  -6   2   10.90    3.60
   9  -6  -2    5.30    2.60
  -9   6   2   11.70    3.50
  -9   6   2   10.50    3.00
  -9   6   2   10.30    3.00
   8  -6  -2    3.90    2.20
  -8  -6   2    1.70    2.00
   8  -6  -2   10.30    3.50
  -8   6   2    1.20    1.50
  -8   6   2    4.10    2.10
   7  -6  -2    0.60    1.80
  -7  -6   2    4.40    2.40
   7  -6  -2    1.00    1.50
  -7   6   2    0.80    1.30
  -7   6   2    0.20    1.40
  -7   6   2   -1.20    1.40
  -6  -6   2    1.70    1.70
   6  -6  -2   -1.00    0.90
   6  -6  -2   -0.30    1.00
  -6   6   2    1.60    1.60
  -6   6   2    0.40    1.20
  -6   6   2    4.10    1.70
   5  -6  -2  317.77   12.20
   5  -6  -2  287.77   14.00
  -5  -6   2  318.17   13.40
   5   6  -2  307.57    8.00
  -5   6   2  310.57   12.80
  -5   6   2  313.47   13.90
   5   6  -2  313.97    8.00
  -5   6   2  323.07   13.00
   4  -6  -2  436.16   17.40
   4  -6  -2  433.06   14.80
  -4  -6   2  427.26   11.70
  -4   6   2  422.06   14.60
   4   6  -2  397.46   15.70
   4   6  -2  431.86   11.70
  -4   6   2  411.96   16.40
  -4   6   2  431.46   15.40
   4   6  -2  429.56   17.30
   3  -6  -2   37.90    4.10
   3  -6  -2   29.90    3.80
  -3  -6   2   32.20    4.20
   3  -6  -2   41.70    5.80
  -3  -6   2   33.80    2.40
   3   6  -2   41.40    5.10
   3   6  -2   35.80    2.50
   3   6  -2   24.00    3.90
  -3   6   2   30.80    4.00
  -3   6   2   33.40    3.90
  -3   6   2   27.70    4.00
   2  -6  -2    1.10    1.10
  -2  -6   2    1.00    0.80
   2  -6  -2    2.10    1.70
  -2  -6   2    0.00    1.00
   2  -6  -2    0.90    1.00
  -2   6   2   -1.00    0.70
   2   6  -2   -0.20    0.70
  -2   6   2    1.40    1.10
  -2   6   2    0.90    1.10
   2   6  -2   -0.10    0.80
   2   6  -2   -0.30    0.80
   1  -6  -2  551.14   20.30
   1  -6  -2  571.64   17.80
  -1  -6   2  566.94   17.50
  -1  -6   2  575.54   16.60
   1  -6  -2  562.34   17.60
  -1   6   2  561.44   19.80
   1   6  -2  548.75   17.70
   1   6  -2  549.85   16.50
  -1   6   2  537.45   17.60
  -1   6   2  580.54   17.70
   1   6  -2  574.34   19.80
   0  -6  -2   69.49    4.40
   0  -6   2   72.09    4.40
   0  -6  -2   71.49    4.90
   0  -6   2   76.19    6.40
   0  -6   2   72.89    4.60
   0   6   2   72.09    4.50
   0   6   2   76.79    5.10
   0   6  -2   63.79    5.40
   0   6  -2   72.99    4.70
   0   6  -2   72.19    4.50
   0   6   2   75.89    6.00
   1  -6   2    7.20    1.70
  -1  -6  -2    5.20    1.90
  -1  -6  -2    8.40    1.90
   1  -6   2    9.40    2.60
   1  -6   2    9.10    2.30
   1   6   2    5.70    1.80
  -1   6  -2    4.70    1.80
  -1   6  -2    5.90    1.70
   1   6   2    3.40    1.70
   1   6   2    4.10    1.60
  -1   6  -2    5.10    2.20
   2  -6   2    3.20    1.40
   2  -6   2    3.60    1.30
   2  -6   2    2.80    1.90
  -2  -6  -2    2.90    1.50
  -2  -6  -2    1.80    1.00
  -2   6  -2    2.70    1.20
   2   6   2    1.30    1.20
   2   6   2    2.50    1.10
   2   6   2    2.50    2.00
  -2   6  -2    6.10    1.90
  -2   6  -2    2.60    1.70
  -3  -6  -2   44.90    3.00
   3  -6   2   52.09    3.70
  -3  -6  -2   55.29    5.80
   3  -6   2   50.69    4.30
   3  -6   2   56.39    6.90
  -3   6  -2   45.10    3.40
   3   6   2   50.89    6.90
   3   6   2   55.69    4.80
  -3   6  -2   34.50    4.50
  -3   6  -2   40.00    4.50
   3   6   2   45.10    3.10
   4  -6   2  436.16   17.60
  -4  -6  -2  426.36   16.20
   4  -6   2  424.36   14.20
  -4   6  -2  488.05   16.30
  -4   6  -2  434.16   17.00
   4   6   2  457.55   12.90
  -4   6  -2  438.26   14.10
   4   6   2  444.16   12.70
   5  -6   2  124.19    8.50
  -5  -6  -2  123.99    7.90
   5  -6   2  116.79    6.20
  -5   6  -2  113.99    7.10
  -5   6  -2  106.89    7.60
   5   6   2  121.49    4.60
  -5   6  -2  126.29    6.20
  -6  -6  -2   21.30    4.10
   6  -6   2   29.70    3.90
   6  -6   2   17.10    3.90
  -6   6  -2   22.00    4.10
  -6   6  -2   23.30    3.30
  -6   6  -2   22.90    3.90
   6   6   2   22.40    1.60
   6   6   2   21.70    1.40
   7  -6   2   60.99    4.90
  -7  -6  -2   75.89    8.30
  -7   6  -2   79.79    8.50
  -7   6  -2   68.69    6.90
  -8  -6  -2   50.99    7.10
   8  -6   2   43.50    6.60
  -8   6  -2   51.29    5.60
  -8   6  -2   48.70    4.20
  -8   6  -2   56.59    7.20
  -8   6  -2   49.30    6.10
   9  -6   2    1.10    1.60
  -9  -6  -2    0.00    1.70
  -9   6  -2    3.30    1.90
  -9   6  -2    0.00    1.30
  -9   6  -2    1.20    1.70
  10  -6   2    2.60    2.30
 -10   6  -2    4.10    2.10
 -10   6  -2    0.20    1.10
  11  -6   2   22.60    5.70
 -11  -6  -2   30.30    6.20
 -11   6  -2   19.10    4.40
 -11   6  -2   31.20    5.20
 -12  -6  -2   59.89    8.70
 -12   6  -2   64.39    8.00
 -12   6  -2   60.49    7.40
 -13  -6  -2    7.50    3.40
 -13   6  -2    9.70    3.20
 -13   6  -2    8.80    3.30
 -14   6  -2   27.60    5.30
 -14   6  -2   30.00    5.70
 -13  -7   2    3.60    3.10
 -13   7   2    1.30    2.00
 -13   7   2    1.70    2.20
 -12  -7   2    0.30    2.00
 -12   7   2   -0.50    1.50
 -12   7   2   -0.10    1.60
 -11  -7   2   -2.10    1.20
 -11   7   2   -1.30    1.00
 -11   7   2   -0.90    1.50
 -11   7   2    1.40    2.20
 -10  -7   2    8.20    3.60
  10  -7  -2    2.10    2.70
 -10   7   2    1.60    2.00
 -10   7   2    1.30    2.00
 -10   7   2   15.10    4.40
   9  -7  -2   52.59    7.40
  -9  -7   2   65.29    8.50
   9  -7  -2   75.39    6.50
  -9   7   2   64.39    7.70
  -9   7   2   60.19    6.90
  -9   7   2   70.99    9.00
   8  -7  -2   25.90    5.50
   8  -7  -2   31.10    4.90
  -8  -7   2   29.30    5.60
  -8   7   2   29.80    5.20
  -8   7   2   29.60    4.90
   7  -7  -2  142.09    8.40
   7  -7  -2  140.69   10.40
  -7  -7   2  161.98   10.10
  -7   7   2  138.49    9.60
  -7   7   2  136.99    8.80
   6  -7  -2  261.57   11.60
   6  -7  -2  249.78   13.90
  -6  -7   2  243.08   12.50
  -6   7   2  253.17   12.10
  -6   7   2  257.47   13.20
  -5  -7   2    1.40    1.70
   5  -7  -2    2.40    1.70
   5  -7  -2    1.00    1.50
  -5   7   2    2.50    1.40
  -5   7   2    4.00    2.30
   5   7  -2    1.40    0.80
   5   7  -2    3.40    0.80
   5   7  -2    1.10    1.50
  -5   7   2    6.30    2.30
  -4  -7   2   13.30    3.20
   4  -7  -2   16.20    3.10
  -4  -7   2   16.70    2.00
   4  -7  -2   13.50    3.80
  -4   7   2   11.90    2.50
   4   7  -2   11.50    3.20
  -4   7   2    7.10    2.40
  -4   7   2   10.70    3.20
   4   7  -2   16.30    2.00
  -3  -7   2    5.50    2.10
  -3  -7   2    8.10    1.70
   3  -7  -2    5.30    1.90
   3  -7  -2    4.50    2.20
  -3   7   2    5.10    2.00
  -3   7   2    7.10    2.10
   3   7  -2    6.20    2.60
   3   7  -2    6.00    1.50
   3   7  -2    4.50    2.00
  -3   7   2    7.40    2.70
   2  -7  -2   25.40    4.30
  -2  -7   2   18.00    2.70
  -2  -7   2   15.10    3.00
   2  -7  -2   20.30    3.40
   2  -7  -2   27.40    5.30
  -2   7   2   22.20    3.60
   2   7  -2   13.10    2.80
  -2   7   2   29.40    5.10
   2   7  -2   23.10    4.60
   2   7  -2   23.60    3.00
  -2   7   2   28.30    3.90
   1  -7  -2   36.20    4.40
  -1  -7   2   29.70    3.50
  -1  -7   2   30.40    3.90
   1  -7  -2   27.50    3.70
   1   7  -2   32.70    5.00
   1   7  -2   43.20    6.00
   1   7  -2   31.50    3.60
  -1   7   2   23.60    3.50
  -1   7   2   27.40    5.10
  -1   7   2   30.80    4.10
   0  -7  -2  127.79    7.10
   0  -7  -2  133.89    6.90
   0  -7   2  116.19    7.10
   0  -7   2  135.09    6.90
   0   7   2  119.29    7.10
   0   7  -2  129.99    6.70
   0   7  -2  122.09    8.20
   0   7  -2  121.59    6.80
   0   7   2  143.29    7.00
   0   7   2  138.69    8.80
   1  -7   2   23.70    4.70
  -1  -7  -2   14.80    3.40
   1  -7   2   18.70    3.20
  -1  -7  -2   17.00    2.80
   1  -7   2   17.50    2.90
  -1   7  -2   12.50    2.70
  -1   7  -2   17.00    3.00
  -1   7  -2    7.90    2.40
   1   7   2   18.00    3.40
   1   7   2   15.30    2.60
   1   7   2    8.10    2.90
   2  -7   2    3.50    1.50
   2  -7   2    1.50    1.70
   2  -7   2    1.70    1.40
  -2  -7  -2    1.70    1.20
  -2  -7  -2    2.80    1.60
  -2   7  -2    3.40    1.90
   2   7   2   -0.10    1.10
  -2   7  -2    2.40    1.40
   2   7   2    1.20    1.50
  -2   7  -2    6.40    2.20
  -3  -7  -2  163.28    6.70
  -3  -7  -2  152.28    8.60
   3  -7   2  143.19    7.10
   3  -7   2  155.88    9.90
   3   7   2  153.68   10.00
  -3   7  -2  146.79    7.20
  -3   7  -2  150.18    8.20
   3   7   2  155.28    6.70
   4  -7   2    8.70    2.20
   4  -7   2    7.80    2.70
  -4  -7  -2    9.30    2.80
   4   7   2    7.00    1.60
  -4   7  -2   11.70    2.40
   4   7   2    8.30    1.60
  -4   7  -2    8.60    2.90
   4   7   2   10.80    3.50
  -4   7  -2   10.00    2.70
   5  -7   2   17.10    4.10
  -5  -7  -2   13.40    3.30
   5  -7   2   12.70    2.50
  -5   7  -2    9.50    2.90
  -5   7  -2   10.30    2.70
   5   7   2   13.30    1.70
   5   7   2   12.60    1.80
  -5   7  -2   10.20    2.30
   6  -7   2   30.30    5.10
  -6  -7  -2   47.60    6.30
   6  -7   2   48.40    5.10
  -6   7  -2   37.90    5.30
   6   7   2   37.70    2.10
  -6   7  -2   52.99    7.30
   6   7   2   43.40    2.30
   7  -7   2   14.20    2.80
   7  -7   2   16.10    4.20
  -7  -7  -2   14.60    3.80
  -7   7  -2   23.70    5.10
  -7   7  -2   11.50    3.30
  -7   7  -2   13.80    2.60
   8  -7   2  186.48   12.40
  -8  -7  -2  182.88   11.40
  -8   7  -2  166.38    8.50
  -8   7  -2  179.08   10.40
  -8   7  -2  169.68   11.10
  -8   7  -2  165.08   10.10
  -9  -7  -2   61.39   11.30
  -9   7  -2   43.50    6.60
  -9   7  -2   67.19    8.70
  -9   7  -2   58.49    6.40
 -10  -7  -2  147.39   11.10
 -10   7  -2  161.08    9.30
 -10   7  -2  152.28   11.00
 -10   7  -2  167.68   10.60
 -11  -7  -2  136.59   11.00
 -11   7  -2  125.39    8.60
 -11   7  -2  140.09   10.00
 -12  -7  -2    7.80    3.90
 -12   7  -2    6.80    2.80
 -12   7  -2    1.90    2.40
 -13  -7  -2   38.30    7.60
 -13   7  -2   39.90    6.70
 -13   7  -2   39.20    6.00
 -13  -8   2  150.68   12.70
 -13   8   2  139.29   10.40
 -13   8   2  133.79   19.40
 -12  -8   2   11.00    4.40
 -12   8   2    8.00    3.30
 -12   8   2   11.90    3.90
 -11  -8   2   61.79    9.20
 -11   8   2   43.60    7.00
 -11   8   2   56.79    7.50
 -11   8   2   54.59    7.30
 -10  -8   2    0.30    2.00
 -10   8   2    0.00    1.60
 -10   8   2   -2.10    0.90
 -10   8   2    0.20    1.20
   9  -8  -2    5.90    3.30
   9  -8  -2    8.70    3.20
  -9  -8   2    6.80    3.10
  -9   8   2    7.50    3.10
  -9   8   2    9.80    3.70
   8  -8  -2  140.99    9.00
   8  -8  -2  148.49   11.60
  -8  -8   2  132.29   10.00
  -8   8   2  145.09   10.50
  -7  -8   2  105.99    8.50
   7  -8  -2  110.39    7.60
   7  -8  -2  115.59   10.00
  -7   8   2  106.69    8.00
  -7   8   2  108.59    9.00
   6  -8  -2  794.42   26.30
   6  -8  -2  850.11   31.10
  -6  -8   2  846.02   28.60
  -6   8   2  852.81   27.90
  -6   8   2  869.31   29.90
   6   8  -2  828.62   30.50
   5  -8  -2  422.86   20.00
  -5  -8   2  439.26   17.80
   5  -8  -2  454.05   16.70
   5   8  -2  435.86   12.40
   5   8  -2  437.66   12.30
  -5   8   2  446.66   17.50
  -5   8   2  447.86   19.10
   5   8  -2  435.96   19.60
   4  -8  -2  205.28   10.00
  -4  -8   2  205.78    7.70
  -4  -8   2  210.68   10.90
   4  -8  -2  216.48   13.10
   4   8  -2  209.58    7.80
  -4   8   2  211.48   12.20
   4   8  -2  215.98   12.50
  -4   8   2  214.48   10.80
   3  -8  -2  170.88    8.90
  -3  -8   2  164.48    9.20
  -3  -8   2  162.48    7.10
   3  -8  -2  179.78   11.60
   3   8  -2  170.88    7.30
  -3   8   2  172.08    9.30
   3   8  -2  181.58   11.10
  -3   8   2  169.98   10.70
   2  -8  -2    1.40    1.40
  -2  -8   2    0.80    1.30
  -2  -8   2    0.00    1.00
   2  -8  -2   -0.10    1.30
  -2   8   2    2.10    2.10
   2   8  -2   -0.10    1.10
  -2   8   2    1.70    1.60
   2   8  -2   -1.00    1.00
   1  -8  -2  143.79    8.00
  -1  -8   2  135.19    7.00
  -1  -8   2  130.59    7.50
   1   8  -2  142.69    8.10
   1   8  -2  142.29    7.20
   1   8  -2  137.69    9.30
  -1   8   2  150.18    9.80
  -1   8   2  129.69    7.50
   0  -8   2  467.65   16.30
   0  -8   2  445.56   15.90
   0  -8  -2  475.25   16.90
   0  -8  -2  473.65   16.30
   0   8  -2  493.45   18.10
   0   8   2  481.85   16.40
   0   8  -2  478.55   19.30
   0   8   2  439.36   19.00
   0   8  -2  471.65   16.80
  -1  -8  -2  278.37   10.90
  -1  -8  -2  274.77   12.10
   1  -8   2  283.37   11.30
  -1   8  -2  245.78   11.20
   1   8   2  291.27   11.20
  -1   8  -2  280.87   13.90
  -1   8  -2  253.67   11.10
   2  -8   2 1350.16   36.30
  -2  -8  -2 1363.86   38.30
  -2   8  -2 1327.57   40.40
  -2   8  -2 1298.37   36.30
   2   8   2 1250.57   40.70
  -2   8  -2 1366.46   37.70
   2   8   2 1326.47   35.60
  -3  -8  -2  156.88    9.00
  -3  -8  -2  119.29    6.20
   3  -8   2  137.49    7.30
  -3   8  -2  138.69    8.20
  -3   8  -2  132.99    7.20
  -3   8  -2  134.89    9.40
   3   8   2  134.99    6.50
   3   8   2  125.89    9.60
   4  -8   2  297.17   11.90
  -4  -8  -2  301.57   13.90
  -4   8  -2  308.67   13.50
   4   8   2  325.67   10.80
   4   8   2  303.57   10.40
  -4   8  -2  303.47   15.00
   4   8   2  303.47   19.50
  -4   8  -2  291.87   11.70
  -5  -8  -2   27.10    4.80
   5  -8   2   24.90    3.60
   5   8   2   27.90    2.90
  -5   8  -2   28.70    5.70
   5   8   2   30.80    2.50
   5   8   2   19.00    4.40
  -5   8  -2   31.90    4.10
  -5   8  -2   27.70    4.60
   6  -8   2    2.80    1.70
  -6  -8  -2    3.70    2.20
  -6   8  -2    4.00    1.60
   6   8   2    4.50    1.10
  -6   8  -2    1.60    2.20
   6   8   2    4.70    1.10
  -6   8  -2    5.20    2.50
   7  -8   2  164.48    8.80
  -7  -8  -2  174.28   11.10
  -7   8  -2  164.18   10.20
  -7   8  -2  186.38   11.70
  -7   8  -2  177.68    8.80
   8  -8   2  136.89    8.20
  -8   8  -2  155.58   10.90
  -8   8  -2  138.19   10.90
  -9  -8  -2  178.68   12.10
  -9   8  -2  158.08    9.10
  -9   8  -2  163.08   10.70
  -9   8  -2  159.08   11.40
 -10  -8  -2  160.88   11.90
 -10   8  -2  117.19   13.70
 -10   8  -2  157.78   10.70
 -10   8  -2  144.59    8.90
 -11  -8  -2    1.40    2.80
 -11   8  -2    1.40    1.70
 -11   8  -2    1.10    1.80
 -11   8  -2    0.70    2.00
 -12  -8  -2   12.70    4.60
 -12   8  -2   11.30    3.10
 -12   8  -2   12.30    4.00
 -13  -8  -2   -1.40    1.80
 -13   8  -2   -1.70    1.70
 -13   8  -2    0.80    1.80
 -12  -9   2   33.90    7.00
 -12   9   2   30.00    6.20
 -12   9   2   30.50    5.50
 -11  -9   2   -0.30    2.00
 -11   9   2   -1.00    1.40
 -11   9   2   -1.90    1.20
 -11   9   2    2.20    2.20
 -10  -9   2   85.39   10.20
 -10   9   2  104.19   12.30
 -10   9   2   68.89    8.40
 -10   9   2  102.69    8.20
   9  -9  -2   68.79    8.10
  -9  -9   2   83.29    9.80
  -9   9   2   68.79    8.90
  -9   9   2   76.29    8.80
   9   9  -2   82.49   14.80
  -8  -9   2  113.79    9.40
   8  -9  -2   94.29    7.50
  -8   9   2  102.39    8.50
   8   9  -2  123.99   14.00
  -8   9   2   75.19    8.50
   7  -9  -2   62.79    7.00
  -7   9   2   51.09    7.10
  -7   9   2   64.09    9.00
   7   9  -2   64.99    9.70
  -6  -9   2    6.90    3.00
   6  -9  -2    3.20    1.90
   6   9  -2    0.50    1.70
   6   9  -2    3.70    0.70
  -6   9   2    3.30    2.40
   6   9  -2    3.80    0.60
  -6   9   2    4.50    2.50
   5  -9  -2   77.19    6.30
  -5  -9   2   89.89    9.20
   5   9  -2   87.79   10.40
  -5   9   2   95.09   10.60
   5   9  -2   79.09    4.00
   5   9  -2   66.59    3.70
  -5   9   2   57.79    6.90
   4  -9  -2   66.99   11.70
  -4  -9   2  103.59    5.30
   4  -9  -2  102.09    7.10
  -4  -9   2  111.59    8.00
  -4   9   2   99.69    7.50
   4   9  -2   85.69    9.40
   4   9  -2   99.29    5.30
  -4   9   2   98.29    8.60
  -3  -9   2   10.60    2.90
   3  -9  -2    8.40    2.60
  -3  -9   2   13.70    2.50
   3   9  -2   10.90    2.30
  -3   9   2    9.50    2.90
  -3   9   2   12.20    3.80
   3   9  -2   13.50    4.30
  -2  -9   2  458.65   15.80
   2  -9  -2  510.15   18.10
  -2  -9   2  473.05   17.80
   2   9  -2  471.65   16.10
   2   9  -2  471.15   20.40
  -2   9   2  477.65   17.90
   1  -9  -2   43.00    5.50
  -1  -9   2   46.10    5.40
  -1   9   2   53.99    5.90
   1   9  -2   43.60    5.00
   1   9  -2   47.80    7.30
  -1   9   2   53.79    7.60
   0  -9   2  261.37   11.50
   0  -9  -2  246.68   11.70
   0   9  -2  288.97   14.70
   0   9  -2  255.97   11.30
   0   9   2  274.97   14.60
   0   9   2  237.58   11.10
  -1  -9  -2    5.70    2.30
   1  -9   2    5.20    2.00
   1   9   2    6.10    2.80
   1   9   2    3.20    1.90
  -1   9  -2    6.50    2.40
  -1   9  -2    4.30    2.30
   2  -9   2   10.10    2.70
  -2  -9  -2   12.40    3.50
  -2  -9  -2    9.70    2.40
  -2   9  -2    5.80    2.50
  -3  -9  -2   92.29    7.30
  -3  -9  -2   84.49    5.30
   3  -9   2   95.39    6.30
  -3   9  -2   88.99    6.90
  -3   9  -2   93.49    6.30
   3   9   2   93.09    5.60
   3   9   2  109.49   11.90
  -3   9  -2  100.49   12.90
  -4  -9  -2   51.59    6.70
   4  -9   2   45.30    5.20
   4   9   2   44.90    3.70
   4   9   2   36.50    3.80
  -4   9  -2   44.60    5.90
  -4   9  -2   46.60    5.30
  -4   9  -2   62.79   10.80
   4   9   2   32.30    6.00
  -5  -9  -2   48.20    6.80
   5  -9   2   56.69    5.90
   5   9   2   50.59    3.60
   5   9   2   42.40    7.10
   5   9   2   49.60    3.40
  -5   9  -2   35.60    5.50
   6  -9   2  207.78   10.20
  -6  -9  -2  201.38   12.20
  -6   9  -2  222.38   15.30
  -6   9  -2  227.58   12.30
   6   9   2  196.98    7.00
   6   9   2  218.88    7.40
   6   9   2  204.58   14.00
  -7  -9  -2    4.30    2.60
   7  -9   2   -0.40    1.20
  -7   9  -2    0.50    1.60
   7   9   2    2.80    2.60
  -7   9  -2    3.00    2.70
  -8  -9  -2  154.28   11.40
   8  -9   2  163.68    9.30
  -8   9  -2  182.08   11.30
  -8   9  -2  164.48   12.00
  -9  -9  -2   12.20    4.00
  -9   9  -2   11.00    4.10
  -9   9  -2    9.10    3.00
  -9   9  -2   13.20    3.80
 -10  -9  -2   19.30    4.90
 -10   9  -2   10.90    3.10
 -10   9  -2    9.70    3.80
 -10   9  -2    5.90    3.20
 -11  -9  -2  117.19   12.70
 -11   9  -2  100.09   11.70
 -11   9  -2  115.79    8.20
 -11   9  -2  118.39    9.90
 -12  -9  -2   -0.80    1.90
 -12   9  -2    0.50    2.50
 -12   9  -2    5.40    2.60
 -11 -10   2   13.50    4.90
 -11  10   2   13.80    4.10
 -11  10   2   16.20    4.30
  11  10  -2   16.00    5.70
 -10 -10   2   17.90    4.90
 -10  10   2   17.80    5.40
 -10  10   2   13.60    5.30
  10  10  -2    9.10    4.00
 -10  10   2   13.40    4.40
  -9 -10   2    8.60    3.90
   9 -10  -2   12.20    3.60
  -9  10   2   13.40    4.10
  -9  10   2   20.80    5.10
   9  10  -2   14.20    5.20
  -8 -10   2   21.10    5.10
   8 -10  -2   24.50    4.70
  -8  10   2   21.20    4.60
  -8  10   2   29.60    6.60
   8  10  -2    9.40    4.00
   7 -10  -2    3.80    2.50
  -7 -10   2    2.60    2.30
   7  10  -2    4.20    2.70
  -7  10   2    5.60    3.30
   6 -10  -2   86.69    7.10
  -6 -10   2   88.49    9.50
  -6  10   2  112.29    8.70
   6  10  -2   84.59   10.50
  -6  10   2   73.09   11.50
   6  10  -2   90.49    3.50
  -5 -10   2    8.80    3.30
   5 -10  -2    6.60    2.60
   5  10  -2    8.30    3.50
  -5  10   2    9.80    3.20
  -5  10   2    7.40    3.60
   5  10  -2    4.40    1.40
   5  10  -2    6.90    1.50
  -4 -10   2    8.20    2.90
  -4 -10   2    8.10    2.10
   4 -10  -2   10.10    3.00
   4  10  -2    7.00    3.30
  -4  10   2   15.30    4.90
  -4  10   2   19.20    4.30
   4  10  -2    9.80    2.20
  -3 -10   2   12.00    2.50
  -3 -10   2   10.60    3.30
   3 -10  -2   16.00    3.60
  -3  10   2    9.60    4.50
   3  10  -2   16.60    3.00
  -3  10   2   14.60    3.90
   3  10  -2   14.40    4.60
   2 -10  -2   -0.30    1.40
  -2 -10   2    5.90    2.50
   2  10  -2    0.80    1.90
   2  10  -2   -1.90    1.00
  -2  10   2    5.80    4.60
  -2  10   2    1.80    1.80
  -1 -10   2   36.30    5.30
   1 -10  -2   22.40    4.30
   1  10  -2   25.60    4.10
  -1  10   2   21.40    5.10
  -1  10   2   34.80    5.10
   1  10  -2   30.10    6.30
   0 -10  -2   65.49    7.20
   0 -10   2   59.49    6.50
   0  10  -2   67.29    5.90
   0  10   2   73.29    6.00
   0  10   2   70.09    9.10
   0  10  -2   67.19    9.00
  -1 -10  -2    2.30    2.00
   1 -10   2    4.70    2.20
  -1  10  -2   -1.80    1.20
   1  10   2    1.50    1.60
   1  10   2    2.20    2.50
  -1  10  -2    4.90    2.70
   2 -10   2   44.50    5.40
  -2 -10  -2   42.70    6.10
  -2  10  -2   38.70    5.70
   2  10   2   33.60    6.00
  -2  10  -2   41.40    6.90
   2  10   2   41.40    4.90
   3 -10   2   57.49    6.20
  -3 -10  -2   66.19    7.80
   3  10   2   57.99    4.80
   3  10   2   62.69    8.70
  -3  10  -2   65.79    9.00
  -3  10  -2   66.69    7.50
   4 -10   2   17.40    3.40
  -4 -10  -2   15.40    4.00
   4  10   2   14.70    2.60
  -4  10  -2   15.10    4.10
  -4  10  -2   17.00    4.40
   4  10   2   10.00    3.80
   4  10   2   13.60    2.70
   5 -10   2    5.90    2.30
   5  10   2    7.80    1.80
   5  10   2    7.60    1.80
   5  10   2    7.60    3.70
  -5  10  -2    3.50    2.40
  -5  10  -2    4.20    2.70
   6 -10   2   31.40    4.70
  -6 -10  -2   20.10    4.80
   6  10   2   11.20    3.70
  -6  10  -2   34.90    7.10
   6  10   2   27.90    2.40
   6  10   2   25.00    2.60
  -6  10  -2   25.50    5.10
  -7 -10  -2    3.10    2.50
   7 -10   2    1.00    1.50
  -7  10  -2    0.80    2.00
   7  10   2    2.90    2.40
  -7  10  -2   -0.70    1.90
   8 -10   2   18.30    3.90
  -8 -10  -2   16.90    4.80
   8  10   2   28.70    7.10
  -8  10  -2   17.30    4.50
  -8  10  -2   17.10    5.30
  -9 -10  -2   11.10    4.00
   9  10   2    5.90    3.30
  -9  10  -2    8.60    2.70
  -9  10  -2   15.40    4.70
  -9  10  -2    4.90    2.80
 -10 -10  -2   65.29    9.60
 -10  10  -2   61.49    6.90
  10  10   2   66.39   10.10
 -10  10  -2   60.29    9.80
 -10  10  -2   84.59   10.50
   9 -11  -2   66.89    8.20
  -9 -11   2   72.19    9.80
  -9  11   2   51.39    8.70
   9  11  -2   59.99    9.90
  -9  11   2   73.09   10.80
  -8 -11   2   12.70    4.30
   8 -11  -2   20.80    5.00
  -8  11   2   16.20    4.80
  -8  11   2   23.20    5.70
   8  11  -2   14.60    5.10
  -7 -11   2    3.10    2.80
   7 -11  -2    3.10    2.10
  -7  11   2    3.70    2.70
   7  11  -2    4.70    3.00
  -7  11   2    0.90    2.20
  -6 -11   2   14.60    4.30
   6 -11  -2   11.10    3.30
  -6  11   2   15.10    5.00
  -6  11   2   18.80    4.80
   6  11  -2   12.70    1.80
   6  11  -2   13.40    5.10
   5 -11  -2   97.39    7.80
  -5 -11   2  110.99    9.00
   5  11  -2  108.39   12.60
   5  11  -2  109.89    5.50
  -5  11   2  114.19   10.30
  -5  11   2  101.09    8.60
   4 -11  -2    0.10    1.30
  -4  11   2    3.50    2.30
  -4  11   2    1.00    2.00
   4  11  -2    1.50    2.30
   4  11  -2    0.00    1.00
  -3 -11   2   23.70    4.90
   3 -11  -2   18.00    3.90
  -3  11   2   16.20    4.30
  -3  11   2   14.80    4.60
   3  11  -2   19.80    5.10
   3  11  -2   17.20    3.30
   2 -11  -2    5.10    2.50
  -2 -11   2   10.10    3.40
  -2  11   2    7.10    2.80
  -2  11   2   12.20    4.30
   2  11  -2   15.20    4.70
   2  11  -2    8.70    2.60
  -1 -11   2  126.59    8.60
   1 -11  -2  119.79    8.60
  -1  11   2  122.79    8.50
  -1  11   2  136.09   11.10
   1  11  -2  121.59    7.90
   1  11  -2  121.79   10.50
   0 -11   2   15.10    3.60
   0 -11  -2   22.00    4.60
   0  11  -2   13.80    3.40
   0  11  -2   11.30    4.30
   0  11   2   17.20    4.90
   0  11   2   13.40    3.40
  -1 -11  -2   15.20    4.00
   1 -11   2    9.70    2.90
   1  11   2    8.00    2.80
   1  11   2   14.30    4.50
  -1  11  -2    7.00    3.00
  -1  11  -2    7.80    3.60
  -2 -11  -2   16.10    4.00
   2 -11   2   11.30    3.20
   2  11   2   16.90    3.40
  -2  11  -2   13.40    3.70
  -2  11  -2   10.90    3.90
   2  11   2   13.60    5.00
   3 -11   2  147.29    8.90
  -3 -11  -2  136.29   10.90
  -3  11  -2  172.28   13.90
   3  11   2  151.98   12.20
  -3  11  -2  137.99   11.30
   3  11   2  150.38    8.20
   4 -11   2   11.80    3.10
  -4 -11  -2   16.50    4.30
   4  11   2   16.70    4.80
   4  11   2   12.30    2.70
  -4  11  -2   10.20    3.50
  -4  11  -2   21.10    5.60
   5 -11   2   13.30    3.10
  -5 -11  -2   13.60    4.20
  -5  11  -2    6.70    3.00
   5  11   2   12.40    2.50
  -5  11  -2   20.90    5.90
   5  11   2   13.40    4.40
  -6 -11  -2    8.00    3.30
   6 -11   2    7.10    2.40
  -6  11  -2   10.70    3.50
   6  11   2   10.40    1.80
  -6  11  -2    7.70    3.60
   6  11   2    7.80    3.90
  -7 -11  -2   19.10    5.00
   7 -11   2   17.70    3.70
  -7  11  -2   15.20    4.30
  -7  11  -2   13.30    4.30
   7  11   2   11.40    4.00
   8 -11   2    2.30    1.80
  -8 -11  -2   -1.50    1.40
  -8  11  -2    0.60    2.20
  -8  11  -2    2.00    2.30
   8  11   2   -0.50    1.60
  -9  11  -2   16.80    5.10
   9  11   2   20.20    6.50
  -9  11  -2   27.50    6.70
  -9  11  -2   20.90    4.20
   7 -12  -2   45.70    6.80
  -7 -12   2   45.20    7.80
   7  12  -2   37.20    7.60
  -7  12   2   30.70    9.10
  -7  12   2   29.90    7.20
   6 -12  -2   32.20    5.90
  -6 -12   2   23.60    5.20
  -6  12   2   32.30    7.70
  -6  12   2   22.00    5.20
   6  12  -2   12.70    5.30
  -5 -12   2    5.00    3.00
  -5  12   2   11.20    4.80
  -5  12   2    5.90    3.10
   5  12  -2    6.20    3.70
   5  12  -2    8.10    1.90
  -4 -12   2   -1.30    1.40
   4 -12  -2    1.10    2.00
   4  12  -2    2.70    2.70
   4  12  -2    0.60    1.00
  -4  12   2    4.00    2.70
  -4  12   2    1.60    2.30
   3 -12  -2   11.50    4.00
  -3 -12   2   19.40    4.50
  -3  12   2   16.00    4.10
  -3  12   2   19.60    5.50
   3  12  -2   12.10    2.80
   2 -12  -2   19.60    6.70
  -2 -12   2   23.70    5.10
   2  12  -2   14.80    3.60
  -2  12   2   15.80    4.80
  -2  12   2   14.10    3.70
   2  12  -2   17.20    4.70
  -1 -12   2   11.60    3.40
   1  12  -2    5.80    2.60
  -1  12   2   14.60    4.80
   1  12  -2    7.30    3.20
  -1  12   2    5.90    2.70
   0 -12   2    4.80    2.30
   0 -12  -2    4.20    2.50
   0  12   2    7.50    2.80
   0  12  -2    4.00    2.80
   0  12   2    7.30    3.50
   0  12  -2    6.50    2.60
  -1 -12  -2   53.09    7.00
   1 -12   2   65.19    7.50
  -1  12  -2   42.80    8.10
   1  12   2   50.79    6.50
   1  12   2   56.59    9.60
  -2 -12  -2   62.79    8.00
   2 -12   2   75.19    8.00
   2  12   2   72.49    6.10
  -2  12  -2   73.59    8.30
  -2  12  -2   68.19    9.30
   2  12   2   76.99   10.70
  -3 -12  -2   54.19    7.50
   3 -12   2   70.29    7.40
   3  12   2   70.39   10.70
  -3  12  -2   74.69    8.60
   3  12   2   73.69    6.00
  -3  12  -2   79.19   10.60
   4 -12   2   27.50    4.60
  -4 -12  -2   14.50    4.30
   4  12   2   22.70    3.60
   4  12   2   19.80    6.20
  -4  12  -2   24.30    6.30
  -4  12  -2   19.80    4.60
   5 -12   2    3.20    2.10
  -5 -12  -2    2.90    2.70
   5  12   2    4.40    3.10
  -5  12  -2    3.60    2.50
  -5  12  -2    0.60    1.70
  -6 -12  -2   -1.00    1.40
   6 -12   2    0.30    1.20
  -6  12  -2   -1.00    1.40
   6  12   2   -0.60    1.80
  -6  12  -2   -1.20    1.80
   7 -12   2    0.40    1.10
  -7 -12  -2    3.20    2.70
  -7  12  -2    1.00    2.40
   7  12   2   -1.70    1.20
   5 -13  -2   14.20    3.90
  -5 -13   2   10.50    4.00
   5  13  -2   20.30    5.80
  -5  13   2   11.80    4.40
   4 -13  -2   -1.60    1.00
  -4 -13   2    1.40    2.10
   4  13  -2    2.10    1.50
   4  13  -2   -0.20    2.10
  -4  13   2    1.90    1.90
  -4  13   2    2.10    2.70
  -3 -13   2    8.80    3.00
   3 -13  -2    7.40    3.10
  -3  13   2   10.90    3.70
   3  13  -2   19.10    3.60
   3  13  -2    9.70    4.00
  -3  13   2   20.60    6.00
  -2 -13   2   -0.50    1.60
   2 -13  -2    0.60    1.50
   2  13  -2    0.30    1.30
  -2  13   2   -0.70    2.10
  -2  13   2    2.80    2.90
   2  13  -2    1.50    2.40
   1 -13  -2   27.20    5.60
  -1 -13   2   25.90    5.20
  -1  13   2   28.50    5.50
  -1  13   2   24.90    6.00
   1  13  -2   13.10    4.80
   0 -13  -2   43.90    6.90
   0 -13   2   44.20    6.40
   0  13  -2   28.30    6.60
   0  13  -2   39.10    6.20
   0  13   2   54.89    7.10
   0  13   2   32.50    6.50
  -1 -13  -2   20.50    4.90
   1 -13   2   20.60    4.30
   1  13   2   10.10    7.00
  -1  13  -2   18.50    5.80
  -1  13  -2   25.90    5.30
   1  13   2   24.20    4.70
   2 -13   2    1.50    1.70
  -2 -13  -2    1.00    1.80
  -2  13  -2    1.10    2.00
   2  13   2    5.00    3.20
  -2  13  -2    0.90    1.80
   2  13   2    3.10    1.80
  -3 -13  -2   32.40    6.40
   3  13   2   26.00    4.10
   3  13   2   11.00    4.40
  -3  13  -2   16.70    5.60
  -3  13  -2   18.80    4.80
   4 -13   2    8.50    3.40
  -4 -13  -2    5.80    3.30
   4  13   2    2.80    1.60
  -4  13  -2    3.80    2.90
   4  13   2    6.10    3.90
  -4  13  -2    7.20    3.10
 -16   0   3   -0.70    1.90
 -16   0   3    1.80    1.40
 -15   0   3   62.69    9.10
 -15   0   3   74.59    5.50
 -14   0   3    1.30    2.20
  14   0  -3    0.60    1.90
 -14   0   3    0.20    1.20
  13   0  -3   24.60    4.90
 -13   0   3   27.90    3.90
 -13   0   3   35.50   10.50
  12   0  -3   -0.40    0.70
  12   0  -3    0.20    1.20
 -12   0   3    0.90    2.10
  11   0  -3   97.09    7.40
  11   0  -3  103.29    6.00
 -11   0   3   95.99    5.60
 -11   0   3  114.79    8.90
 -10   0   3    1.60    1.10
 -10   0   3    3.40    2.00
  10   0  -3   -1.20    0.50
  10   0  -3   -0.30    0.90
   9   0  -3   92.49    6.30
  -9   0   3   78.49    4.60
   9   0  -3   80.89    4.80
  -9   0   3   79.59    6.50
  -8   0   3    0.10    0.70
  -8   0   3    2.60    2.70
   8   0  -3    0.50    0.80
   8   0  -3    0.40    0.80
  -8   0   3    1.70    1.30
  -7   0   3   41.50    2.90
  -7   0   3   44.70    5.50
  -7   0   3   39.20    4.90
   7   0  -3   43.10    3.00
  -6   0   3    1.60    1.30
  -6   0   3    0.40    0.90
   6   0  -3   -1.20    0.60
  -6   0   3    0.40    0.80
  -5   0   3  287.97   10.50
  -5   0   3  279.57   10.50
   5   0  -3  279.47    8.70
  -5   0   3  279.57    8.60
  -4   0   3    2.00    1.00
   4   0  -3    0.30    0.50
  -4   0   3   -0.30    0.40
   4   0  -3   -0.70    0.30
  -4   0   3    0.40    0.70
  -3   0   3 4561.54  119.19
  -3   0   3 4824.02  114.39
   3   0  -3 4757.52  114.39
  -3   0   3 4984.50  120.39
  -2   0   3    0.00    0.30
   2   0  -3    0.20    0.30
  -2   0   3    0.70    0.30
  -2   0   3   -0.30    0.30
   2   0  -3    0.80    0.40
   2   0  -3    0.70    0.50
   1   0  -3   48.10    1.50
  -1   0   3   49.99    1.90
  -1   0   3   47.80    2.10
  -1   0   3   46.90    1.80
   1   0  -3   43.90    1.80
   1   0  -3   46.40    2.10
  -1   0   3   49.40    1.50
   0   0  -3    0.10    0.20
   0   0  -3    1.10    0.30
   0   0   3    0.00    0.20
   1   0   3    4.80    0.60
  -1   0  -3    3.80    0.50
  -1   0  -3    4.00    0.60
   1   0   3    8.10    0.90
   2   0   3    0.20    0.40
   2   0   3    1.20    0.50
  -2   0  -3    0.50    0.40
  -2   0  -3    0.90    0.40
  -3   0  -3  300.47    9.10
   3   0   3  294.67    8.70
  -3   0  -3  300.97    8.70
   3   0   3  295.77    9.10
  -4   0  -3    0.60    0.50
   4   0   3    0.20    0.50
  -4   0  -3    0.50    0.80
   4   0   3    0.30    0.60
   5   0   3 4599.04  121.39
  -5   0  -3 4855.11  122.59
  -5   0  -3 4644.54  116.69
   5   0   3 4675.93  116.79
  -6   0  -3    1.30    1.10
   6   0   3    0.00    0.50
   6   0   3    0.40    0.60
  -6   0  -3    0.00    0.50
   7   0   3 1141.49   30.00
   7   0   3 1083.39   31.70
  -7   0  -3 1135.39   32.00
   7   0   3 1200.68   32.90
  -8   0  -3    0.10    1.10
  -8   0  -3    0.70    0.90
   8   0   3    1.60    1.30
   8   0   3    0.00    0.80
   8   0   3   -0.10    0.90
  -9   0  -3    2.50    1.80
  -9   0  -3    1.20    1.00
   9   0   3    0.60    0.80
   9   0   3   -0.60    0.60
  10   0   3    0.50    1.10
 -10   0  -3   -1.00    0.70
  10   0   3    1.80    1.40
 -10   0  -3   -0.40    1.20
 -11   0  -3   25.40    3.60
  11   0   3   32.00    5.90
 -11   0  -3   24.90    5.00
  11   0   3   26.50    3.70
 -12   0  -3    2.70    1.50
 -12   0  -3    0.40    1.50
  12   0   3    0.40    2.00
  13   0   3  308.77   16.40
 -13   0  -3  318.17   12.70
 -13   0  -3  305.97   15.90
 -14   0  -3   -0.90    1.40
 -14   0  -3   -0.50    0.90
 -15   0  -3  147.89    8.50
 -15   0  -3  154.88   11.60
 -16   0  -3    0.10    1.10
 -16   0  -3    3.00    2.90
 -16  -1   3    0.20    2.10
 -16   1   3    1.00    1.50
 -16   1   3    1.90    2.30
 -15  -1   3   27.50    6.00
 -15  -1   3   32.90    4.00
 -15   1   3   33.00    4.70
 -15   1   3   28.10    5.80
 -14  -1   3  112.39    6.60
 -14  -1   3  136.39   11.00
  14   1  -3  139.89   15.50
 -14   1   3  115.79    7.40
 -14   1   3  123.49   12.70
  13  -1  -3  104.99    9.00
 -13  -1   3  107.39    5.70
 -13  -1   3  107.49    9.50
  13   1  -3  105.39    6.30
  13   1  -3  107.39    8.70
 -13   1   3  104.39   13.80
 -13   1   3  101.29    6.70
 -12  -1   3  312.87   16.00
 -12  -1   3  282.67   10.60
  12  -1  -3  325.37   15.50
  12   1  -3  286.07   14.30
  12   1  -3  301.37   11.10
 -12   1   3  292.47   12.10
 -12   1   3  332.37   16.10
 -11  -1   3  107.19    5.40
  11  -1  -3  113.39    8.20
 -11  -1   3   97.39    8.20
 -11   1   3  108.29    8.40
  11   1  -3  100.89    5.40
 -11   1   3   96.99    6.10
  11   1  -3  112.89    7.80
 -10  -1   3    5.00    1.40
  10  -1  -3    5.80    2.00
  10  -1  -3    3.50    1.60
 -10  -1   3   -1.00    1.00
 -10   1   3    1.70    1.40
  10   1  -3    6.20    1.60
  10   1  -3    3.90    1.90
 -10   1   3    6.20    2.80
   9  -1  -3  199.98   10.00
  -9  -1   3  183.88    7.00
  -9  -1   3  192.28   10.70
  -9   1   3  185.28    8.20
   9   1  -3  191.18    7.30
   9   1  -3  184.28    9.40
  -9   1   3  172.88    9.80
   8  -1  -3  278.67   10.50
  -8  -1   3  281.07    9.10
   8  -1  -3  286.67   12.00
  -8  -1   3  304.07   13.10
   8   1  -3  277.47    9.20
  -8   1   3  281.87   10.40
  -8   1   3  283.97   12.10
  -8   1   3  289.57   13.90
   7  -1  -3    3.00    1.30
   7  -1  -3    4.80    1.60
  -7  -1   3    4.20    1.20
  -7  -1   3    3.50    1.70
  -7   1   3    2.00    1.20
  -7   1   3    2.30    1.50
   7   1  -3    4.90    1.20
   7   1  -3    3.60    1.60
  -6  -1   3  240.98   10.00
   6  -1  -3  214.58    8.90
   6  -1  -3  205.78    8.00
  -6  -1   3  219.68    6.80
   6   1  -3  197.68    9.20
   6   1  -3  215.78    6.90
  -6   1   3  221.08    9.20
  -6   1   3  222.48    9.50
  -6   1   3  215.48    8.00
  -5  -1   3   15.40    2.70
   5  -1  -3    7.90    1.60
  -5   1   3    6.50    1.30
   5   1  -3    9.60    1.20
  -5   1   3    7.00    1.90
  -5   1   3   11.60    2.20
   5   1  -3   10.50    2.20
  -4  -1   3 2964.80   72.89
  -4  -1   3 3026.00   83.59
   4  -1  -3 2988.40   82.19
   4  -1  -3 2980.00   77.99
  -4   1   3 3010.60   77.79
  -4   1   3 3214.98   83.39
   4   1  -3 3026.80   73.09
  -4   1   3 2971.20   81.69
   4   1  -3 3080.59   83.59
  -3  -1   3  314.77    9.90
  -3  -1   3  298.87    7.70
   3  -1  -3  306.07    9.70
  -3   1   3  296.77    9.00
   3   1  -3  297.57    7.70
  -3   1   3  298.87    9.50
  -3   1   3  300.67    9.20
   3   1  -3  301.27    9.80
  -2  -1   3   17.20    0.80
   2  -1  -3   18.50    1.60
   2  -1  -3   19.10    1.50
  -2  -1   3   18.30    0.90
  -2  -1   3   17.10    1.90
  -2   1   3   15.90    1.40
   2   1  -3   16.30    1.80
  -2   1   3   17.10    1.40
  -2   1   3   18.40    1.60
   1  -1  -3  449.95   15.10
   1  -1  -3  496.95   16.30
  -1  -1   3  486.55   13.30
  -1  -1   3  487.65   15.60
  -1   1   3  494.65   16.20
   1   1  -3  477.05   13.20
  -1   1   3  469.65   15.30
   1   1  -3  472.55   15.40
   0  -1  -3  137.49    4.30
   0  -1   3  134.79    3.70
   0  -1   3  132.39    4.20
   0  -1   3  136.19    4.20
   0  -1  -3  131.59    4.40
   0   1  -3  141.59    4.20
   0   1  -3  134.59    4.20
   0   1   3  146.29    4.50
   0   1   3  143.59    4.30
   0   1  -3  134.09    3.70
  -1  -1  -3    1.70    0.40
  -1  -1  -3    2.60    0.70
   1  -1   3    2.60    0.70
   1  -1   3    2.40    0.60
   1   1   3    1.20    0.50
  -1   1  -3    2.10    0.50
   1   1   3    2.80    0.50
  -1   1  -3    2.90    0.70
  -2  -1  -3   10.90    1.50
  -2  -1  -3   15.00    1.10
   2  -1   3   16.30    1.70
   2  -1   3   15.20    1.00
   2  -1   3   19.40    2.40
  -2   1  -3   16.70    1.70
   2   1   3   14.30    1.10
   2   1   3   11.00    1.50
  -2   1  -3   14.30    1.00
  -2   1  -3   17.30    2.00
   3  -1   3 1949.80   52.09
  -3  -1  -3 1886.31   54.09
   3  -1   3 1932.41   50.99
   3   1   3 1892.31   54.09
  -3   1  -3 1937.11   51.89
   3   1   3 1942.81   49.10
  -4  -1  -3 3755.02   94.59
   4  -1   3 3745.33   98.39
  -4  -1  -3 4011.10  102.19
   4  -1   3 3888.31   98.09
  -4   1  -3 3809.92   97.89
   4   1   3 3885.41   94.79
   4   1   3 3887.31  101.99
  -4   1  -3 3960.40   99.19
   5  -1   3  182.18    7.00
  -5  -1  -3  190.98    8.00
   5  -1   3  173.78    7.10
  -5  -1  -3  180.38    6.20
   5  -1   3  184.78    8.10
   5   1   3  169.78    7.60
  -5   1  -3  179.48    7.00
  -5   1  -3  183.48    7.30
   5   1   3  182.38    6.20
   6  -1   3    2.70    1.20
   6  -1   3    1.30    0.80
   6  -1   3   17.10    3.20
  -6  -1  -3    3.80    1.50
  -6  -1  -3    2.10    0.80
  -6   1  -3    1.40    0.90
  -6   1  -3    1.00    0.90
   6   1   3    7.80    1.40
   6   1   3    0.90    0.90
   7  -1   3   68.69    4.90
   7  -1   3   77.29    5.60
  -7  -1  -3   78.59    4.10
  -7  -1  -3   81.49    5.60
   7  -1   3   78.99    4.70
   7   1   3   82.39    4.10
  -7   1  -3   80.29    5.10
  -7   1  -3   81.09    5.40
  -7   1  -3   79.59    4.70
  -8  -1  -3   65.09    3.90
  -8  -1  -3   76.49    6.70
   8  -1   3   69.59    5.70
   8  -1   3   66.09    5.10
   8   1   3   65.39    5.30
  -8   1  -3   66.19    5.20
  -8   1  -3   65.09    5.00
   8   1   3   74.59    4.10
  -8   1  -3   74.99    4.80
   9  -1   3  203.68   10.70
   9  -1   3  194.78    8.80
  -9  -1  -3  191.28   10.20
  -9  -1  -3  203.98    7.90
   9   1   3  190.88    7.80
  -9   1  -3  213.68    9.00
  -9   1  -3  180.08   11.00
  -9   1  -3  177.78    9.30
 -10  -1  -3   85.99    8.70
  10  -1   3   72.99    8.50
 -10  -1  -3   73.89    4.60
  10   1   3   68.39    6.20
 -10   1  -3   64.89    4.90
  10   1   3   76.19    4.70
 -10   1  -3   70.79    7.40
  11  -1   3  464.95   20.00
 -11  -1  -3  543.15   20.70
 -11  -1  -3  499.45   16.00
  11   1   3  487.95   16.20
  11   1   3  498.15   20.20
 -11   1  -3  517.85   19.90
 -11   1  -3  492.85   17.20
 -12  -1  -3   28.40    4.80
  12  -1   3   19.30    4.10
 -12  -1  -3   35.80    6.10
 -12   1  -3   28.00    4.20
 -12   1  -3   26.10    5.20
  12   1   3   25.20    3.50
  12   1   3   32.90    5.80
 -13  -1  -3   78.09    5.30
  13  -1   3   99.69   11.30
  13   1   3   53.29    7.00
 -13   1  -3   76.89    6.10
 -13   1  -3   89.99    9.40
 -14  -1  -3    6.30    2.00
 -14  -1  -3    5.30    3.20
 -14   1  -3    7.50    2.50
 -14   1  -3    4.30    2.70
 -15  -1  -3   21.30    3.40
 -15  -1  -3   31.50    6.30
 -15   1  -3   24.30    4.40
 -15   1  -3   23.70    5.30
 -16  -1  -3   69.49    9.60
 -16   1  -3   63.59    8.80
 -16   1  -3   63.79    7.00
 -16  -2   3   14.60    5.00
 -16   2   3   15.80    4.90
 -16   2   3   15.60    3.50
 -15  -2   3    7.90    3.80
 -15   2   3    1.90    2.60
 -15   2   3    1.40    1.80
 -14  -2   3   36.60    2.70
 -14  -2   3   41.50    7.40
 -14   2   3   33.80    6.30
 -14   2   3   42.60    5.70
  13  -2  -3    6.30    3.00
 -13  -2   3    4.00    2.70
 -13  -2   3    5.40    1.40
  13   2  -3    2.30    2.10
 -13   2   3    2.40    2.40
 -13   2   3    5.20    2.20
  13   2  -3    3.80    1.30
 -12  -2   3  194.88    7.10
 -12  -2   3  184.58   12.20
  12   2  -3  181.48   11.00
  12   2  -3  190.88    7.20
 -12   2   3  212.18   12.40
 -12   2   3  211.48   10.20
  11  -2  -3    8.40    3.20
 -11  -2   3    0.90    1.70
 -11  -2   3    3.80    1.10
  11   2  -3    5.60    2.10
  11   2  -3    7.40    1.50
 -11   2   3    6.70    2.70
 -11   2   3    6.40    2.20
 -10  -2   3   18.90    4.40
  10  -2  -3   19.60    4.20
 -10  -2   3   19.30    2.10
 -10   2   3   18.50    3.90
 -10   2   3   19.90    3.40
  10   2  -3   17.10    2.10
  -9  -2   3  225.88   11.60
  -9  -2   3  197.28    6.80
   9  -2  -3  232.38   11.20
   9  -2  -3  194.78    9.30
   9   2  -3  214.08    7.00
  -9   2   3  210.98   10.80
  -8  -2   3  802.42   25.70
   8  -2  -3  753.62   24.50
   8  -2  -3  781.92   23.10
  -8  -2   3  751.32   19.50
   8   2  -3  776.52   19.70
  -8   2   3  764.32   26.50
  -8   2   3  782.62   22.80
  -8   2   3  767.42   24.30
  -7  -2   3  183.48    9.60
   7  -2  -3  205.08    9.50
  -7  -2   3  189.68    7.40
   7  -2  -3  198.98    8.50
   7   2  -3  199.18    9.80
   7   2  -3  189.18    5.90
  -7   2   3  189.68    8.20
  -7   2   3  220.08    9.80
   6  -2  -3  687.13   21.10
   6  -2  -3  697.43   20.10
  -6  -2   3  701.43   21.80
  -6  -2   3  690.13   16.80
   6   2  -3  679.03   16.80
  -6   2   3  722.03   21.30
  -6   2   3  692.63   20.80
  -6   2   3  681.93   20.70
  -6   2   3  686.63   19.90
   6   2  -3  637.14   21.20
  -5  -2   3  140.39    3.90
   5  -2  -3  134.09    6.70
   5  -2  -3  141.29    6.80
  -5  -2   3  149.09    7.30
   5  -2  -3  141.09    6.30
   5   2  -3  145.59    7.20
  -5   2   3  148.39    6.70
  -5   2   3  154.78    6.80
  -5   2   3  149.69    6.40
   5   2  -3  135.79    3.80
   4  -2  -3 1565.74   46.60
  -4  -2   3 1625.64   50.89
   4  -2  -3 1543.95   48.60
  -4   2   3 1542.45   46.00
   4   2  -3 1507.25   49.70
  -4   2   3 1608.24   48.20
  -3  -2   3  547.75   16.10
   3  -2  -3  571.04   15.60
   3  -2  -3  566.74   16.10
  -3   2   3  531.75   15.70
  -3   2   3  543.25   15.50
   3   2  -3  536.25   16.00
   2  -2  -3   63.59    3.30
  -2  -2   3   59.19    2.00
   2  -2  -3   60.69    3.20
   2  -2  -3   59.39    3.40
  -2  -2   3   60.99    3.30
  -2   2   3   62.89    3.20
  -2   2   3   57.59    3.10
  -2   2   3   59.39    3.30
   2   2  -3   61.79    2.00
   1  -2  -3  541.95   18.40
   1  -2  -3  536.45   18.90
  -1  -2   3  511.65   15.40
  -1   2   3  514.75   18.10
   1   2  -3  532.95   18.30
  -1   2   3  518.65   18.70
   1   2  -3  538.65   15.60
   0  -2   3 3228.08   78.79
   0  -2  -3 3291.47   82.59
   0  -2   3 3331.87   80.09
   0  -2  -3 3284.07   80.69
   0   2   3 3250.47   82.49
   0   2   3 3252.27   80.69
   0   2  -3 3237.68   79.09
   1  -2   3    4.40    0.90
  -1  -2  -3    5.10    0.90
  -1  -2  -3    4.90    1.10
   1  -2   3    6.00    1.30
   1  -2   3    5.50    0.60
  -1   2  -3    4.60    1.00
  -1   2  -3    5.50    0.70
  -1   2  -3    4.90    0.90
   1   2   3    7.70    1.20
   2  -2   3 2579.34   66.69
  -2  -2  -3 2574.04   68.99
   2  -2   3 2531.25   62.59
  -2   2  -3 2549.04   66.89
   2   2   3 2577.74   63.09
   2   2   3 2536.35   68.89
   2   2   3 2532.55   63.29
  -2   2  -3 2580.94   62.39
  -3  -2  -3  132.79    4.80
  -3  -2  -3  136.29    5.90
   3  -2   3  129.69    5.40
  -3   2  -3  131.99    5.50
   3   2   3  136.19    4.40
  -3   2  -3  129.69    5.90
  -3   2  -3  135.49    4.60
   3   2   3  123.59    5.70
  -3   2  -3  135.49    5.20
   4  -2   3  563.04   17.40
  -4  -2  -3  562.94   17.10
   4  -2   3  559.84   16.30
  -4   2  -3  573.94   15.60
   4   2   3  564.94   17.20
   5  -2   3  779.92   21.50
  -5  -2  -3  779.52   22.60
  -5   2  -3  748.33   21.30
   5   2   3  729.03   22.40
  -5   2  -3  760.02   20.80
  -6  -2  -3  614.54   16.10
   6  -2   3  631.94   19.90
   6  -2   3  597.84   18.10
  -6  -2  -3  610.24   19.50
   6   2   3  594.34   16.00
  -6   2  -3  603.24   17.80
  -6   2  -3  584.94   18.00
  -6   2  -3  610.34   18.00
   6   2   3  545.95   18.90
  -7  -2  -3   -0.80    0.80
  -7  -2  -3    0.20    0.50
   7  -2   3    0.50    1.00
  -7   2  -3    1.30    1.00
   7   2   3    0.60    1.00
   7   2   3    0.10    0.50
  -7   2  -3    0.90    1.10
  -7   2  -3    0.60    0.90
   8  -2   3  340.47   14.50
   8  -2   3  334.77   12.60
  -8  -2  -3  340.27   10.60
  -8  -2  -3  366.66   14.60
  -8   2  -3  343.07   13.20
  -8   2  -3  315.57   13.70
   8   2   3  343.87   10.70
  -8   2  -3  343.57   12.70
  -9  -2  -3  104.09    4.90
  -9  -2  -3  110.99    7.70
   9  -2   3  104.69    7.60
  -9   2  -3  102.99    6.40
   9   2   3  102.99    4.90
  -9   2  -3  100.29    6.90
  -9   2  -3  101.29    6.50
  10  -2   3  328.87   15.50
 -10  -2  -3  336.67   15.30
 -10  -2  -3  334.57   11.00
 -10   2  -3  325.47   14.30
  10   2   3  339.77   11.20
 -10   2  -3  306.27   12.90
  11  -2   3    6.00    2.60
 -11  -2  -3   14.60    3.90
 -11  -2  -3   12.30    2.30
  11   2   3   14.10    2.40
 -11   2  -3   15.80    3.20
 -11   2  -3   13.10    3.70
 -12  -2  -3   11.90    3.60
 -12  -2  -3   11.70    2.20
  12  -2   3    7.80    3.60
 -12   2  -3    8.00    3.10
  12   2   3   10.60    3.40
  12   2   3   13.20    2.40
 -12   2  -3   11.20    3.10
 -13  -2  -3   23.90    3.10
 -13  -2  -3   16.40    4.80
 -13   2  -3   18.20    4.40
 -13   2  -3   24.20    4.10
  13   2   3   26.40    5.20
  13   2   3   23.50    5.50
 -14  -2  -3   22.80    5.30
 -14  -2  -3   19.50    2.90
 -14   2  -3   25.60    4.40
 -14   2  -3   23.90    4.90
 -15  -2  -3    8.70    3.80
 -15   2  -3   16.70    4.40
 -15   2  -3    8.20    2.80
 -15  -3   3   75.09   10.00
 -15   3   3   83.19   10.00
 -15   3   3   70.49    7.60
 -14  -3   3   72.59   10.10
 -14   3   3   77.49   10.00
 -13  -3   3  207.18   13.80
  13  -3  -3  243.88   14.50
 -13   3   3  226.38   11.60
 -13   3   3  234.78   15.10
  13   3  -3  243.28   13.50
  12  -3  -3   81.09    8.90
 -12   3   3   84.39    6.50
 -12   3   3   95.59   10.10
  11  -3  -3   34.00    5.60
 -11  -3   3   31.60    6.10
 -11   3   3   27.40    4.50
 -11   3   3   21.90    4.50
 -10  -3   3    7.40    3.10
  10  -3  -3   10.20    3.00
 -10   3   3    6.40    2.60
 -10   3   3    5.70    2.10
   9  -3  -3   45.60    7.00
  -9  -3   3   45.40    6.10
  -9   3   3   39.10    5.30
  -9   3   3   47.40    5.40
  -8  -3   3  440.06   17.10
   8  -3  -3  409.66   16.40
   8  -3  -3  423.56   15.30
  -8   3   3  420.96   15.00
  -8   3   3  411.86   15.60
  -7  -3   3  279.27   12.50
   7  -3  -3  297.77   12.50
   7  -3  -3  281.97   11.30
  -7   3   3  294.87   12.00
  -7   3   3  291.37   12.00
  -7   3   3  295.37   11.70
  -7   3   3  299.97   11.30
   7   3  -3  250.97   12.80
   6  -3  -3  185.28    8.40
  -6  -3   3  210.48    9.70
   6  -3  -3  195.78    9.30
   6  -3  -3  203.38    9.00
  -6   3   3  179.58    8.30
   6   3  -3  187.18    9.20
  -6   3   3  185.78    8.80
  -6   3   3  197.18    8.40
   5  -3  -3  944.91   27.20
  -5  -3   3  959.30   27.30
   5  -3  -3  955.60   26.20
   5   3  -3  889.61   26.90
  -5   3   3  931.01   26.00
  -5   3   3  938.81   26.70
   4  -3  -3    2.90    1.20
   4  -3  -3    2.90    1.30
  -4  -3   3    1.90    1.10
   4  -3  -3    1.80    0.90
  -4   3   3    1.20    0.80
  -4   3   3    3.50    1.20
  -4   3   3    3.10    1.30
   4   3  -3    4.90    1.60
   3  -3  -3   72.79    4.10
   3  -3  -3   67.49    4.40
  -3  -3   3   67.89    4.20
   3  -3  -3   72.89    4.10
  -3  -3   3   72.39    2.20
  -3   3   3   72.89    4.00
   3   3  -3   69.99    2.10
  -3   3   3   72.39    4.10
  -3   3   3   63.99    4.10
   3   3  -3   62.09    4.10
   2  -3  -3  722.53   20.60
   2  -3  -3  739.63   19.70
   2   3  -3  682.03   19.60
  -1  -3   3  185.18    5.90
  -1  -3   3  194.38    6.60
   1  -3  -3  188.68    7.70
   1  -3  -3  175.48    6.60
   1  -3  -3  186.28    6.80
   1   3  -3  192.28    6.00
  -1   3   3  194.58    6.80
  -1   3   3  191.08    7.60
   1   3  -3  190.58    7.40
  -1   3   3  182.48    6.80
   0  -3   3  164.48    5.50
   0  -3  -3  160.78    5.90
   0  -3  -3  174.08    6.40
   0  -3   3  175.58    7.00
   0   3  -3  171.18    5.90
   0   3  -3  178.18    5.80
   0   3   3  167.98    6.40
   0   3   3  162.68    7.10
   0   3  -3  163.18    6.70
   0   3   3  167.78    6.00
   1  -3   3    7.00    1.60
   1  -3   3    6.10    1.20
   1  -3   3    7.20    1.00
  -1  -3  -3    7.40    1.20
  -1  -3  -3    5.40    1.30
   1   3   3    5.80    1.10
  -1   3  -3    9.80    1.20
   1   3   3    6.30    1.40
  -1   3  -3    9.70    1.90
  -1   3  -3    4.40    1.00
   2  -3   3   19.90    2.50
   2  -3   3   23.50    2.60
  -2  -3  -3   24.10    2.90
   2  -3   3   23.30    1.60
   2   3   3   24.20    1.60
  -2   3  -3   21.60    1.50
   2   3   3   21.90    1.60
  -2   3  -3   23.70    3.10
   2   3   3   23.50    3.00
  -2   3  -3   20.30    2.40
  -3  -3  -3    1.70    1.00
   3  -3   3    1.60    1.00
   3  -3   3    1.30    1.00
   3  -3   3    3.50    0.90
   3   3   3    3.50    0.80
  -3   3  -3    4.00    0.90
   3   3   3    1.30    0.90
  -3   3  -3    4.80    1.60
   3   3   3    3.50    0.80
  -3   3  -3    1.90    1.00
   4  -3   3  121.89    6.50
  -4  -3  -3  121.29    6.30
   4  -3   3  117.89    5.80
   4  -3   3  125.59    5.10
   4   3   3  113.29    4.20
   4   3   3  122.39    4.20
  -4   3  -3  114.19    6.20
   4   3   3  115.69    6.20
  -4   3  -3  123.59    4.90
  -4   3  -3  106.79    5.60
  -5  -3  -3   69.09    4.90
   5  -3   3   68.09    5.00
  -5  -3  -3   65.69    2.90
   5  -3   3   68.39    4.40
  -5   3  -3   67.69    3.90
   5   3   3   65.99    2.80
  -5   3  -3   67.39    3.80
   5   3   3   55.79    4.50
  -5   3  -3   63.49    4.30
  -5   3  -3   64.99    4.80
  -6  -3  -3   57.59    2.70
  -6  -3  -3   55.09    4.70
   6  -3   3   63.99    6.70
   6  -3   3   51.69    4.10
   6   3   3   48.90    2.50
   6   3   3   53.39    5.80
  -6   3  -3   59.89    3.90
  -6   3  -3   53.09    4.50
  -6   3  -3   54.69    4.20
  -6   3  -3   57.09    3.90
   7  -3   3  107.49    7.30
   7  -3   3  117.99    6.60
  -7  -3  -3  110.79    4.30
  -7  -3  -3  111.59    7.20
  -7   3  -3  114.69    6.80
   7   3   3   97.49    7.50
  -7   3  -3  105.39    6.00
  -7   3  -3  109.39    5.90
  -8  -3  -3    0.60    0.50
   8  -3   3   -0.20    0.70
  -8  -3  -3   -0.10    1.00
  -8   3  -3    0.00    0.90
   8   3   3   -0.20    0.50
  -8   3  -3    0.40    0.80
  -8   3  -3    0.90    1.00
  -9  -3  -3    0.80    0.80
  -9  -3  -3    4.70    2.30
   9  -3   3   -0.20    0.90
  -9   3  -3    0.80    1.40
  -9   3  -3   -1.00    0.80
   9   3   3    1.10    0.80
  -9   3  -3    2.90    1.80
 -10  -3  -3   21.90    4.80
  10  -3   3   30.10    5.80
 -10  -3  -3   24.70    2.60
  10   3   3   25.40    2.60
 -10   3  -3   29.80    4.60
 -10   3  -3   20.20    3.80
 -11  -3  -3  110.19    5.00
  11  -3   3  120.39    9.40
 -11  -3  -3  117.69    9.10
 -11   3  -3  112.49    7.60
 -11   3  -3  115.19    8.20
  11   3   3  107.19    5.00
 -12  -3  -3  141.49    6.10
 -12  -3  -3  176.68   13.20
  12   3   3  163.28    6.50
 -12   3  -3  154.88    9.30
 -12   3  -3  138.09    9.50
 -13  -3  -3   20.90    5.40
 -13  -3  -3    8.10    1.60
 -13   3  -3   17.60    3.90
 -13   3  -3    5.70    2.70
  13   3   3   12.70    1.90
 -14  -3  -3    3.80    1.20
 -14  -3  -3   -0.10    2.00
 -14   3  -3    1.30    1.70
 -15  -3  -3    9.30    3.70
 -15   3  -3    5.20    2.60
 -15   3  -3    4.40    2.70
 -15  -4   3   69.29   10.90
 -15   4   3   69.39    8.00
 -15   4   3   75.89    9.70
 -14  -4   3    2.10    2.60
 -14   4   3    3.20    2.30
 -14   4   3    1.90    2.10
 -13  -4   3   88.19   10.70
  12  -4  -3   69.39    9.00
 -12  -4   3   76.19    9.50
 -12   4   3   63.49    7.90
 -12   4   3   75.69    8.00
  11  -4  -3  107.89    8.90
 -11  -4   3  121.59    9.50
 -11   4   3  109.39    8.40
 -11   4   3  105.99    7.60
  10  -4  -3   84.69    7.50
 -10  -4   3  106.19    8.50
 -10   4   3   83.99    7.00
 -10   4   3   83.39    6.50
  -9  -4   3   46.90    6.60
   9  -4  -3   59.59    7.60
  -9   4   3   42.50    5.20
  -9   4   3   47.20    5.80
   8  -4  -3  209.78   11.30
  -8  -4   3  232.58   11.80
  -8   4   3  222.78   10.30
  -8   4   3  230.18   10.90
  -8   4   3  209.78   10.80
   7  -4  -3 1775.22   48.60
  -7   4   3 1724.53   46.30
  -6  -4   3    2.50    1.90
   6  -4  -3    0.20    0.80
   6  -4  -3    0.90    1.20
   6  -4  -3   -0.30    0.90
  -6   4   3   -0.70    0.70
  -6   4   3    2.90    1.70
   6   4  -3    0.00    1.00
  -6   4   3    2.10    1.40
   5  -4  -3 1409.06   37.30
  -5   4   3 1447.46   37.00
   5   4  -3 1295.87   39.80
   4  -4  -3  160.28    7.40
  -4  -4   3  170.78    7.90
   4  -4  -3  166.08    7.30
  -4   4   3  159.68    7.40
   4   4  -3  150.28    7.70
  -4   4   3  151.28    7.70
  -4   4   3  170.18    7.20
  -3  -4   3  318.07   11.40
   3  -4  -3  329.87   11.30
  -3  -4   3  318.07    8.50
   3  -4  -3  327.27   11.00
  -3   4   3  314.97   10.80
   3   4  -3  318.17    8.40
  -3   4   3  314.77   11.90
  -3   4   3  293.37   10.90
   3   4  -3  294.17   11.20
  -2  -4   3  222.58    8.30
   2  -4  -3  214.88   10.40
   2  -4  -3  215.28    8.20
   2  -4  -3  204.48    8.10
  -2  -4   3  217.48    6.70
   2   4  -3  217.98    8.40
  -2   4   3  202.18    9.00
  -2   4   3  211.98    8.20
   2   4  -3  214.48    6.60
  -2   4   3  218.28    8.20
   2   4  -3  214.38    9.10
   1  -4  -3   80.29    4.40
   1  -4  -3   84.09    5.30
   1  -4  -3   73.49    4.10
  -1  -4   3   77.19    3.60
  -1  -4   3   73.89    4.00
  -1   4   3   88.59    4.50
   1   4  -3   77.79    4.90
   1   4  -3   85.69    4.30
   1   4  -3   80.29    3.70
  -1   4   3   81.79    4.30
   0  -4  -3   94.89    4.40
   0  -4  -3   85.19    4.60
   0  -4   3   81.49    5.10
   0  -4   3   86.69    4.00
   0  -4   3   84.89    4.10
   0   4  -3   83.99    4.10
   0   4   3   73.59    4.40
   0   4  -3   86.69    4.10
   0   4   3  126.59    7.90
   0   4  -3   90.09    5.20
   0   4   3   92.79    4.40
   1  -4   3 3249.27   83.59
  -1  -4  -3 3207.28   83.99
  -1  -4  -3 3336.27   89.89
   1  -4   3 3284.87   86.09
   1   4   3 3313.97   90.09
  -1   4  -3 3250.07   86.39
   1   4   3 3388.06   84.89
  -2  -4  -3    1.00    0.60
   2  -4   3    1.70    0.70
   2  -4   3    1.30    1.10
  -2  -4  -3    1.10    0.80
   2  -4   3    0.70    0.80
  -2   4  -3    2.70    1.30
  -2   4  -3    2.30    1.10
   2   4   3    0.70    0.60
  -2   4  -3    1.20    0.70
   2   4   3   -0.70    0.40
   3  -4   3 2651.23   68.69
   3  -4   3 2562.34   73.29
  -3  -4  -3 2660.23   77.39
  -3   4  -3 2616.34   68.59
   3   4   3 2541.65   66.59
  -3   4  -3 2602.04   73.79
   3   4   3 2583.84   76.89
   4  -4   3   93.29    5.50
   4  -4   3   95.09    6.30
  -4  -4  -3  105.89    6.20
   4  -4   3  105.69    4.80
   4   4   3  112.89    6.40
   4   4   3  103.89    4.00
   4   4   3  102.59    3.90
  -4   4  -3   96.09    6.10
  -4   4  -3  103.39    5.80
  -4   4  -3  105.39    4.60
   5  -4   3  103.49    5.20
   5  -4   3  108.49    6.10
   5  -4   3  104.59    6.80
  -5  -4  -3  103.59    6.50
  -5   4  -3   99.29    4.90
  -5   4  -3  104.99    6.10
   5   4   3  102.29    3.90
   5   4   3  105.99    3.90
   5   4   3  110.99    6.70
  -5   4  -3  109.49    6.70
   6  -4   3  101.59    6.20
  -6  -4  -3   96.39    6.90
   6  -4   3  109.39    7.30
   6   4   3  102.09    3.90
  -6   4  -3  110.29    5.70
   6   4   3  106.69    6.90
  -6   4  -3   97.69    5.20
  -6   4  -3  122.39   12.80
  -6   4  -3  100.49    6.80
   6   4   3  101.99    3.80
   7  -4   3    4.30    1.90
  -7  -4  -3    2.20    1.60
   7   4   3    4.40    1.00
  -7   4  -3    4.70    1.60
  -7   4  -3    2.10    1.30
  -7   4  -3    3.80    1.40
  -7   4  -3    1.70    1.60
   7   4   3    3.60    0.80
  -8  -4  -3   13.90    3.50
   8  -4   3   18.40    3.90
   8   4   3   17.90    2.10
  -8   4  -3   21.50    3.50
  -8   4  -3   17.40    3.50
   8   4   3   17.90    1.40
  -8   4  -3   13.60    2.70
  -9  -4  -3  408.56   17.20
   9  -4   3  363.36   16.90
  -9   4  -3  382.26   14.40
   9   4   3  380.96   10.50
   9   4   3  380.56   11.40
  -9   4  -3  375.16   15.20
  -9   4  -3  390.86   14.80
  10  -4   3   16.40    4.00
 -10  -4  -3    7.00    3.20
 -10   4  -3    6.90    2.50
  10   4   3    9.00    1.20
 -10   4  -3   10.10    2.80
 -11  -4  -3  227.28   13.20
  11  -4   3  215.78   13.40
 -11   4  -3  213.98   11.30
 -11   4  -3  220.48   11.40
  11   4   3  218.38    6.50
  12  -4   3    1.60    1.80
 -12  -4  -3    1.10    2.20
 -12   4  -3    1.50    1.70
 -12   4  -3    0.30    1.50
 -13  -4  -3    0.80    2.30
 -13   4  -3    3.70    2.20
 -13   4  -3    6.10    2.70
 -14  -4  -3    8.70    3.50
 -14   4  -3   11.30    3.50
 -15  -4  -3    8.40    3.90
 -15   4  -3   10.80    3.40
 -15   4  -3   18.30    4.60
 -15  -5   3   11.30    4.60
 -15   5   3    8.40    3.70
 -15   5   3   13.80    3.90
 -14  -5   3   24.00    5.90
 -14   5   3   38.00    6.90
 -14   5   3   37.00    6.20
 -13  -5   3   16.70    5.00
 -13   5   3   11.30    3.70
 -13   5   3    7.30    2.70
 -12  -5   3    0.60    2.20
  12  -5  -3   -0.10    1.40
 -12   5   3    1.40    2.10
 -12   5   3   -2.30    1.10
 -11  -5   3   29.10    5.60
  11  -5  -3   36.70    6.90
 -11   5   3   32.30    5.50
 -11   5   3   23.70    4.40
 -10  -5   3  293.27   15.30
  10  -5  -3  316.57   16.00
 -10   5   3  301.07   14.30
 -10   5   3  297.97   13.70
   9  -5  -3    2.60    1.90
  -9  -5   3    3.80    1.90
  -9   5   3   -0.90    1.20
  -9   5   3    0.70    1.50
  -9   5   3   -0.20    1.20
   8  -5  -3  629.54   23.60
  -8  -5   3  677.63   23.70
   8  -5  -3  621.84   21.70
  -8   5   3  659.33   21.80
  -8   5   3  612.44   22.50
  -7  -5   3    6.10    2.40
   7  -5  -3   14.60    3.40
  -7   5   3   14.30    2.80
  -7   5   3    9.50    2.50
  -7   5   3   13.70    4.10
   6  -5  -3   27.80    3.90
   6  -5  -3   30.20    4.70
  -6  -5   3   21.90    4.00
  -6   5   3   20.10    3.40
  -6   5   3   28.70    3.90
   5  -5  -3   25.70    3.60
   5  -5  -3   32.00    5.10
  -5  -5   3   19.70    3.50
   5  -5  -3   23.60    3.60
  -5   5   3   29.50    3.90
   5   5  -3   24.60    4.10
  -5   5   3   20.20    3.80
  -5   5   3   27.20    3.70
  -4  -5   3  653.43   20.90
   4  -5  -3  641.64   20.40
   4  -5  -3  669.23   20.20
   4  -5  -3  631.14   21.90
  -4  -5   3  655.13   16.30
   4   5  -3  653.53   16.20
  -4   5   3  681.93   20.60
  -4   5   3  671.83   23.50
  -4   5   3  679.83   20.00
   3  -5  -3  267.47   14.10
  -3  -5   3  253.87   10.30
   3  -5  -3  263.17   10.10
   3  -5  -3  262.27   11.60
  -3  -5   3  262.97    7.90
  -3   5   3  272.07   10.40
  -3   5   3  244.28    9.70
   3   5  -3  259.97   10.60
   3   5  -3  266.97    7.90
   3   5  -3  262.47   11.50
   2  -5  -3  863.11   26.20
  -2  -5   3  852.91   21.90
   2  -5  -3  812.22   23.70
   2  -5  -3  823.92   23.90
   2   5  -3  869.31   25.70
  -2   5   3  837.02   23.90
   2   5  -3  847.42   22.00
   2   5  -3  808.52   23.90
  -2   5   3  864.81   23.90
  -2   5   3  873.11   27.80
   1  -5  -3   57.49    3.90
  -1  -5   3   55.09    3.30
   1  -5  -3   53.79    3.90
   1  -5  -3   60.09    5.00
  -1  -5   3   55.19    3.70
  -1   5   3   57.69    3.90
  -1   5   3   61.29    4.90
   1   5  -3   55.79    3.30
  -1   5   3   55.59    4.00
   1   5  -3   52.89    3.70
   1   5  -3   59.19    4.70
   0  -5   3  905.81   24.30
   0  -5   3  921.81   27.30
   0  -5  -3  907.91   24.70
   0   5   3  927.51   27.40
   0   5   3  916.11   25.50
   0   5  -3  888.91   24.40
   0   5  -3  892.01   26.60
   1  -5   3  205.58    7.50
  -1  -5  -3  205.98    7.70
   1  -5   3  212.88    8.20
   1  -5   3  205.48    9.70
  -1  -5  -3  202.88    8.60
   1   5   3  207.28    7.80
  -1   5  -3  213.58    8.30
   1   5   3  210.48   10.00
   1   5   3  215.38    8.90
  -1   5  -3  209.98    7.70
  -1   5  -3  219.98    9.70
   2  -5   3  398.86   14.90
   2  -5   3  393.16   11.90
  -2  -5  -3  370.76   13.50
   2  -5   3  395.06   13.20
  -2  -5  -3  392.36   11.90
  -2   5  -3  400.56   13.30
   2   5   3  395.56   14.00
  -2   5  -3  400.96   12.00
  -2   5  -3  380.86   14.40
   2   5   3  422.06   12.20
   3  -5   3   48.70    5.60
   3  -5   3   52.69    3.20
  -3  -5  -3   47.20    4.20
  -3   5  -3   46.70    3.10
   3   5   3   49.20    2.90
   3   5   3   51.99    3.10
  -3   5  -3   56.89    4.70
  -3   5  -3   48.40    4.00
   4  -5   3 2119.89   56.09
   4   5   3 2086.79   54.99
   5  -5   3   24.40    4.20
  -5  -5  -3   27.40    4.30
   5  -5   3   37.40    6.40
   5  -5   3   21.60    2.90
  -5   5  -3   29.50    4.70
   5   5   3   22.70    2.30
   5   5   3   23.00    1.80
  -5   5  -3   24.40    2.90
  -5   5  -3   20.50    3.30
   5   5   3   17.40    3.80
  -6  -5  -3  210.18   10.70
   6  -5   3  208.88   11.20
   6  -5   3  215.38    8.90
   6   5   3  216.38    6.80
   6   5   3  220.18    6.50
  -6   5  -3  216.68    8.50
  -6   5  -3  225.98   11.00
  -6   5  -3  214.08   10.10
   7  -5   3   25.30    4.50
  -7  -5  -3   32.50    5.20
  -7   5  -3   21.40    3.60
  -7   5  -3   28.20    3.80
   7   5   3   23.70    1.50
   7   5   3   23.70    1.40
  -7   5  -3   27.20    4.30
  -7   5  -3   26.10    3.50
   8  -5   3    0.80    1.50
  -8  -5  -3    2.80    2.30
  -8   5  -3   -1.30    1.30
   8   5   3    2.50    0.50
   8   5   3    2.00    0.40
  -8   5  -3    3.60    2.00
  -8   5  -3    1.10    1.10
  -9  -5  -3   18.60    4.40
   9  -5   3   23.20    5.80
  -9   5  -3   27.30    3.90
  -9   5  -3   35.30    5.30
  -9   5  -3   29.90    4.30
  10  -5   3  183.68   12.20
 -10  -5  -3  191.58   12.10
 -10   5  -3  213.78   11.20
 -10   5  -3  191.58   10.10
  11  -5   3   17.00    4.70
 -11  -5  -3   16.30    4.50
 -11   5  -3   19.60    4.30
 -11   5  -3   13.50    3.30
 -12  -5  -3  652.53   27.10
 -12   5  -3  696.33   25.10
 -12   5  -3  713.73   25.00
 -13  -5  -3   12.50    4.40
 -13   5  -3    9.50    3.10
 -13   5  -3   13.00    3.60
 -14  -5  -3   96.29   11.30
 -14   5  -3   87.69    9.40
 -14   6   3   36.60    6.70
 -14   6   3   26.30    5.30
 -13  -6   3  131.99   11.30
 -13   6   3  121.19    9.40
 -13   6   3  135.09   10.20
 -12  -6   3    2.00    2.40
 -12   6   3    6.70    3.00
 -12   6   3    6.10    2.70
 -11  -6   3   42.80    7.10
  11  -6  -3   43.30    7.50
 -11   6   3   25.30    4.80
 -11   6   3   32.00    5.50
 -10  -6   3   13.80    4.40
  10  -6  -3   12.40    3.70
 -10   6   3   10.80    3.20
 -10   6   3   17.90    4.00
 -10   6   3   14.30    3.60
  -9  -6   3   16.00    3.90
   9  -6  -3   22.00    5.40
  -9   6   3    8.40    2.90
  -9   6   3   12.50    3.30
  -9   6   3   23.40    4.90
   8  -6  -3   61.79    6.60
   8  -6  -3   58.69    7.30
  -8  -6   3   77.29    8.30
  -8   6   3   83.69    8.90
  -8   6   3   78.59    8.00
   7  -6  -3  315.97   15.40
   7  -6  -3  325.67   13.40
  -7  -6   3  320.77   14.60
  -7   6   3  313.57   14.50
  -7   6   3  303.97   13.40
  -6  -6   3    4.50    2.20
   6  -6  -3    8.50    3.00
   6  -6  -3    6.10    3.10
  -6   6   3    9.30    2.70
  -6   6   3    1.80    1.70
  -6   6   3    2.90    1.50
  -5  -6   3  771.32   25.00
   5  -6  -3  792.62   23.90
   5  -6  -3  783.42   26.60
  -5   6   3  774.72   23.50
   5   6  -3  774.12   18.30
  -5   6   3  746.53   24.10
  -5   6   3  771.52   25.70
   5   6  -3  798.12   18.40
  -4  -6   3   38.60    2.30
   4  -6  -3   34.00    4.90
   4  -6  -3   36.80    4.40
  -4  -6   3   40.00    4.80
   4   6  -3   35.90    2.20
   4   6  -3   31.00    4.40
  -4   6   3   47.60    6.20
  -4   6   3   41.00    4.80
   4   6  -3   45.30    6.30
   3  -6  -3   10.90    2.60
  -3  -6   3   10.20    2.50
  -3  -6   3   10.10    1.60
   3  -6  -3   10.10    2.30
   3  -6  -3    9.70    3.00
   3   6  -3   10.80    2.60
   3   6  -3   12.20    3.20
  -3   6   3   13.50    2.70
  -3   6   3    6.50    2.50
   3   6  -3   11.10    1.70
  -3   6   3   16.80    3.70
  -2  -6   3  376.26   11.60
   2  -6  -3  349.96   15.20
  -2  -6   3  386.46   13.40
   2  -6  -3  372.76   13.30
   2  -6  -3  350.56   13.10
   2   6  -3  398.66   11.80
  -2   6   3  369.76   13.20
  -2   6   3  384.96   13.50
   2   6  -3  360.76   14.80
  -2   6   3  373.36   15.00
   2   6  -3  352.36   13.30
  -1  -6   3   40.80    4.30
   1  -6  -3   25.70    3.90
  -1  -6   3   33.80    3.40
   1  -6  -3   41.40    4.60
   1  -6  -3   41.00    4.50
   1   6  -3   38.30    3.80
   1   6  -3   35.30    4.00
   1   6  -3   29.10    4.00
  -1   6   3   33.80    3.80
  -1   6   3   37.50    5.30
  -1   6   3   35.20    4.20
   0  -6  -3    7.50    2.10
   0  -6  -3   11.30    2.30
   0  -6   3    9.90    2.90
   0  -6   3   10.00    2.00
   0  -6   3   10.10    2.10
   0   6   3   11.60    2.60
   0   6   3   10.20    3.10
   0   6  -3    8.90    2.60
   0   6   3    8.50    2.10
   0   6  -3   11.10    2.20
   0   6  -3   12.70    2.40
   1  -6   3  974.90   26.00
  -1  -6  -3  958.30   26.10
  -1  -6  -3  979.50   27.70
   1  -6   3  967.60   26.80
  -1   6  -3  944.81   26.10
  -1   6  -3  962.80   26.90
   1   6   3  939.41   29.70
   1   6   3  942.81   26.10
  -1   6  -3 1010.40   29.40
   1   6   3  900.51   29.10
  -2  -6  -3  102.39    4.90
   2  -6   3   86.59    4.70
  -2  -6  -3   87.99    5.80
   2  -6   3   88.89    7.10
   2  -6   3   93.29    5.60
  -2   6  -3   85.89    6.30
   2   6   3   95.59    4.90
  -2   6  -3   86.69    4.80
   2   6   3   87.19    6.90
   2   6   3   89.69    5.90
  -2   6  -3   91.89    5.60
   3  -6   3 1254.27   32.50
   3  -6   3 1239.28   37.00
  -3  -6  -3 1254.77   32.00
   3  -6   3 1247.08   34.50
   3   6   3 1192.08   35.30
  -3   6  -3 1295.57   36.60
  -3   6  -3 1256.57   32.60
  -4  -6  -3  365.56   14.50
   4  -6   3  334.57   16.60
   4  -6   3  362.46   12.00
  -4   6  -3  359.76   13.70
   4   6   3  358.66   11.00
  -4   6  -3  343.07   14.70
  -4   6  -3  346.07   11.80
   4   6   3  370.66   10.90
   5  -6   3   28.40    3.40
  -5  -6  -3   24.50    4.20
   5   6   3   28.60    2.10
  -5   6  -3   30.70    4.80
  -5   6  -3   34.20    4.70
  -5   6  -3   28.30    3.40
   5   6   3   27.10    2.20
  -6  -6  -3  272.27   13.10
   6  -6   3  295.57   14.30
   6  -6   3  297.37   11.00
  -6   6  -3  290.67   13.50
   6   6   3  276.67    8.20
  -6   6  -3  276.27   12.40
   6   6   3  273.87    8.30
  -6   6  -3  276.67   10.40
  -7  -6  -3  127.89    9.00
   7  -6   3  154.28   10.20
  -7   6  -3  152.68    7.20
  -7   6  -3  134.09    8.40
  -7   6  -3  137.29    7.30
  -7   6  -3  163.38    9.90
   7   6   3  145.19    4.40
   7   6   3  141.69    4.40
   8  -6   3   52.09    7.60
  -8  -6  -3   37.60    6.00
  -8   6  -3   44.10    5.70
  -8   6  -3   56.39    4.40
  -8   6  -3   45.70    6.30
  -8   6  -3   43.30    4.90
  -9  -6  -3  218.28   12.70
   9  -6   3  208.18   13.20
  -9   6  -3  194.68    9.50
  -9   6  -3  227.38   11.80
  -9   6  -3  229.38   11.80
  -9   6  -3  205.78   12.20
  10  -6   3   25.80    6.60
 -10   6  -3   16.50    3.70
 -10   6  -3   21.40    3.90
 -11  -6  -3  256.87   15.00
 -11   6  -3  252.17   13.50
 -11   6  -3  275.97   12.80
 -12  -6  -3  117.49   12.60
 -12   6  -3   96.29   10.00
 -12   6  -3   81.69    8.60
 -13  -6  -3    4.90    2.90
 -13   6  -3    7.90    3.30
 -13   6  -3    1.90    2.20
 -14   6  -3   39.00    7.30
 -14   6  -3   31.40    5.80
 -13  -7   3   53.49    9.00
 -13   7   3   58.89    7.90
 -13   7   3   54.99    7.50
 -12  -7   3   38.60    7.40
 -12   7   3   36.90    6.10
 -11  -7   3   69.59    9.50
 -11   7   3   68.79    9.50
 -11   7   3   60.89    7.60
 -11   7   3   78.09    9.00
 -10  -7   3    3.80    2.70
  10  -7  -3    9.80    4.10
 -10   7   3    2.20    2.20
 -10   7   3    4.80    2.70
 -10   7   3    4.20    2.30
   9  -7  -3   37.20    6.90
  -9  -7   3   26.10    5.30
   9  -7  -3   24.00    4.40
  -9   7   3   34.60    5.50
  -9   7   3   23.10    5.10
  -8  -7   3  262.37   13.90
   8  -7  -3  277.97   12.90
   8  -7  -3  258.17   14.70
  -8   7   3  249.08   12.70
  -8   7   3  235.68   13.30
  -7  -7   3   71.99    8.10
   7  -7  -3   79.59    9.50
   7  -7  -3   91.39    6.70
  -7   7   3   76.99    6.50
  -7   7   3   69.09    7.80
   6  -7  -3   35.40    6.40
   6  -7  -3   34.00    4.70
  -6  -7   3   37.30    5.60
  -6   7   3   33.30    5.50
  -6   7   3   38.60    5.40
  -5  -7   3  154.08    9.20
   5  -7  -3  159.58    8.60
   5  -7  -3  158.28   10.40
  -5   7   3  169.18    9.20
   5   7  -3  163.08    5.10
   5   7  -3  147.69   10.00
  -5   7   3  159.78    8.40
  -5   7   3  166.88   10.10
  -4  -7   3  426.66   16.30
  -4  -7   3  414.56   12.30
   4  -7  -3  448.36   17.40
   4  -7  -3  429.16   18.50
  -4   7   3  400.26   15.10
  -4   7   3  457.35   16.40
   4   7  -3  435.66   12.40
  -4   7   3  442.46   17.90
   3  -7  -3  344.07   15.80
  -3  -7   3  329.97   14.80
   3  -7  -3  347.67   13.30
  -3  -7   3  343.77   10.90
  -3   7   3  352.46   13.60
  -3   7   3  335.57   13.00
   3   7  -3  308.97   13.40
   3   7  -3  340.77   15.20
   3   7  -3  336.37   10.90
  -2  -7   3    2.70    1.50
   2  -7  -3    4.90    2.60
  -2  -7   3    3.70    1.40
   2  -7  -3    6.00    2.00
  -2   7   3    5.90    2.20
  -2   7   3    5.70    1.80
   2   7  -3    4.20    1.50
   2   7  -3    4.40    1.90
   2   7  -3    3.10    1.80
  -2   7   3    3.20    1.90
  -1  -7   3    1.30    1.10
   1  -7  -3    0.50    1.10
  -1  -7   3   -1.10    0.90
   1  -7  -3    1.20    1.30
  -1   7   3    1.50    1.40
  -1   7   3    0.20    1.30
   1   7  -3    1.10    1.30
   1   7  -3    2.00    1.20
   1   7  -3    0.50    1.20
  -1   7   3    0.60    1.10
   0  -7   3  361.96   12.70
   0  -7  -3  353.16   13.60
   0  -7  -3  341.07   12.70
   0   7   3  359.36   15.50
   0   7  -3  341.27   12.80
   0   7  -3  369.66   12.80
   0   7  -3  366.66   15.20
   0   7   3  336.37   12.60
   0   7   3  347.67   13.60
  -1  -7  -3   72.29    5.50
   1  -7   3   74.29    6.60
   1  -7   3   69.59    4.60
   1  -7   3   66.69    4.80
  -1  -7  -3   61.99    4.40
  -1   7  -3   66.49    4.90
   1   7   3   65.49    5.30
  -1   7  -3   71.89    4.80
  -1   7  -3   66.39    7.60
   1   7   3   56.69    4.30
   1   7   3   86.99   10.30
   2  -7   3  473.85   17.60
  -2  -7  -3  480.15   15.30
  -2  -7  -3  511.15   17.70
   2  -7   3  483.15   15.50
   2  -7   3  480.05   19.30
  -2   7  -3  477.55   15.60
  -2   7  -3  511.75   19.00
   2   7   3  463.05   19.30
   2   7   3  509.75   15.60
  -2   7  -3  496.65   16.90
  -3  -7  -3   52.99    6.10
   3  -7   3   51.79    4.00
   3  -7   3   59.99    7.10
  -3  -7  -3   48.70    3.50
  -3   7  -3   54.79    4.10
  -3   7  -3   53.99    5.60
  -3   7  -3   84.39   10.00
   3   7   3   34.00    4.90
   3   7   3   61.09    4.00
   4  -7   3  232.18    9.20
   4  -7   3  208.28   12.00
  -4  -7  -3  203.58   10.70
  -4   7  -3  196.18    8.60
  -4   7  -3  227.18   10.60
  -4   7  -3  220.18   11.60
   4   7   3  204.98   12.30
   4   7   3  232.98    8.20
   4   7   3  216.28    7.90
  -5  -7  -3    3.60    2.00
   5  -7   3    1.70    1.70
   5  -7   3    2.40    1.30
   5   7   3    2.30    0.90
  -5   7  -3    1.10    0.90
   5   7   3    0.50    0.80
  -5   7  -3    0.30    1.40
  -5   7  -3    2.20    2.10
   6  -7   3   14.20    3.60
   6  -7   3   27.10    3.70
  -6  -7  -3   29.00    5.20
   6   7   3   19.40    2.10
  -6   7  -3   14.50    3.70
  -6   7  -3   23.80    3.40
  -6   7  -3   16.00    3.80
   6   7   3   24.80    1.80
   7  -7   3   42.30    4.90
   7  -7   3   31.20    6.10
  -7  -7  -3   37.50    5.90
  -7   7  -3   41.60    4.60
  -7   7  -3   33.90    5.30
  -7   7  -3   39.50    6.50
   7   7   3   36.90    1.70
   7   7   3   38.20    1.80
  -8  -7  -3   32.60    5.90
  -8   7  -3   35.60    4.30
  -8   7  -3   42.10    5.00
  -8   7  -3   26.50    4.70
  -8   7  -3   27.60    5.40
  -9   7  -3   26.40    7.50
  -9   7  -3   32.50    4.70
  -9   7  -3   35.50    6.50
 -10  -7  -3  197.88   12.90
 -10   7  -3  166.88   11.90
 -10   7  -3  200.68   10.30
 -10   7  -3  198.48   11.80
 -11  -7  -3    2.60    2.60
 -11   7  -3    3.30    2.20
 -11   7  -3    1.40    1.40
 -12  -7  -3   16.80    4.80
 -12   7  -3   22.40    5.00
 -12   7  -3   21.80    4.30
 -13  -7  -3   28.90    6.40
 -13   7  -3   40.00    5.90
 -13   7  -3   40.10    6.60
 -13  -8   3   11.40    4.80
 -13   8   3    8.60    3.50
 -13   8   3    6.30    5.50
 -12  -8   3   23.10    5.90
 -12   8   3   11.80    3.80
 -12   8   3   19.80    4.90
 -11  -8   3    3.70    3.00
 -11   8   3    0.40    1.70
 -11   8   3    2.90    2.50
 -11   8   3    1.50    1.90
 -10  -8   3   10.40    3.80
 -10   8   3   12.90    3.50
 -10   8   3   11.50    3.80
 -10   8   3   15.70    4.70
   9  -8  -3  276.67   13.60
   9  -8  -3  239.88   15.60
  -9  -8   3  252.37   14.70
  -9   8   3  252.17   13.70
  -9   8   3  288.97   15.50
  -8  -8   3   21.80    4.70
   8  -8  -3   23.40    4.50
  -8   8   3   17.70    4.00
  -8   8   3   16.80    6.50
   7  -8  -3    1.40    2.10
   7  -8  -3    1.90    1.80
  -7  -8   3    7.80    3.30
   7   8  -3    2.40    2.10
  -7   8   3    3.00    2.30
  -7   8   3    4.60    2.50
   6  -8  -3  208.08   10.60
   6  -8  -3  206.68   13.20
  -6  -8   3  174.38   10.90
  -6   8   3  198.68   12.10
   6   8  -3  190.08   12.40
  -6   8   3  196.18   10.90
   5  -8  -3   11.60    4.20
  -5  -8   3    8.80    2.90
   5  -8  -3    7.40    2.50
  -5   8   3    7.00    2.50
   5   8  -3   10.00    1.60
   5   8  -3    7.10    1.30
  -5   8   3    7.70    2.90
   5   8  -3    6.10    2.70
   4  -8  -3   46.50    5.60
   4  -8  -3   29.10    5.20
  -4  -8   3   31.60    4.90
  -4  -8   3   35.00    2.80
   4   8  -3   44.50    3.00
   4   8  -3   46.80    7.00
  -4   8   3   54.69    6.60
  -4   8   3   28.70    5.00
  -3  -8   3  242.18   11.20
   3  -8  -3  232.28   10.90
  -3  -8   3  223.78    8.80
   3   8  -3  235.08    9.00
  -3   8   3  253.37   11.40
  -3   8   3  243.88   13.00
   3   8  -3  231.78   12.70
  -2  -8   3    0.40    1.10
  -2  -8   3   -0.60    0.80
   2  -8  -3    0.80    1.30
   2  -8  -3    0.30    1.40
   2   8  -3    4.10    2.60
  -2   8   3   -1.50    1.20
  -2   8   3   -0.20    1.40
   2   8  -3    1.20    1.20
  -1  -8   3  168.98    7.90
   1  -8  -3  176.98    9.10
  -1   8   3  153.28   10.10
  -1   8   3  173.78    8.80
   1   8  -3  166.88    8.80
   1   8  -3  171.28    8.00
   1   8  -3  155.28   10.00
   0  -8   3   12.60    2.70
   0  -8  -3   17.00    3.50
   0  -8   3   17.70    3.20
   0  -8  -3   12.40    2.80
   0   8   3   16.20    3.00
   0   8  -3   13.80    3.40
   0   8   3   24.70    5.20
   0   8  -3   11.50    4.10
   0   8  -3   11.40    2.60
   1  -8   3  174.08    8.20
  -1  -8  -3  161.38    9.00
  -1  -8  -3  158.58    7.90
  -1   8  -3  159.78    8.20
   1   8   3  182.38    8.40
   1   8   3  165.18   10.70
  -1   8  -3  163.48   10.30
  -1   8  -3  165.48    8.50
  -2  -8  -3  244.38   11.80
  -2  -8  -3  255.87   10.30
   2  -8   3  260.97   10.60
  -2   8  -3  272.47   13.60
  -2   8  -3  262.47   11.60
   2   8   3  248.48   13.80
   2   8   3  268.37   10.50
  -3  -8  -3    3.40    1.90
   3  -8   3   -0.90    1.00
  -3  -8  -3    0.80    1.00
  -3   8  -3    0.60    1.00
   3   8   3    2.20    1.30
  -3   8  -3    1.60    1.80
   3   8   3   -1.80    1.20
  -3   8  -3    1.60    1.60
  -4  -8  -3   75.99    6.50
   4  -8   3   84.89    5.40
   4   8   3   43.90    6.00
  -4   8  -3   80.09    6.30
   4   8   3   66.99    4.20
  -4   8  -3   95.89   10.10
  -4   8  -3   74.59    5.40
   4   8   3   77.69    4.60
  -5  -8  -3  238.68   12.20
   5  -8   3  228.48    9.70
  -5   8  -3  191.78   10.80
   5   8   3  213.38    7.80
   5   8   3  219.88    8.10
   5   8   3  196.88   13.00
  -5   8  -3  214.78   12.40
  -6  -8  -3    0.30    1.60
   6  -8   3   -0.30    1.00
   6   8   3    1.10    0.80
   6   8   3    1.20    0.80
  -6   8  -3   -0.80    1.20
  -6   8  -3    0.70    1.20
  -6   8  -3    0.70    1.90
   7  -8   3   24.30    4.30
  -7  -8  -3   26.70    5.40
   7   8   3   22.30    1.40
  -7   8  -3   20.10    4.20
  -7   8  -3   24.10    3.50
  -7   8  -3   24.50    4.60
   7   8   3   22.70    1.40
  -8  -8  -3   26.10    6.10
  -8   8  -3   19.40    4.50
  -8   8  -3   22.00    3.80
  -8   8  -3   17.00    4.50
  -9  -8  -3   91.39   10.10
  -9   8  -3   84.99    6.40
  -9   8  -3   98.69   11.80
  -9   8  -3   93.59    8.00
 -10  -8  -3   51.69    7.90
 -10   8  -3   50.29    6.00
 -10   8  -3   50.79    7.20
 -10   8  -3   64.29    9.30
 -11  -8  -3    5.60    3.20
 -11   8  -3    5.00    2.10
 -11   8  -3    6.30    2.80
 -12  -8  -3   95.29   11.70
 -12   8  -3   82.89    9.50
 -12   8  -3   86.89    7.20
 -12  -9   3   94.59   11.70
 -12   9   3   82.99    9.70
 -12   9   3   77.39    9.30
 -11  -9   3   32.40    6.60
 -11   9   3   57.79    7.50
 -11   9   3   40.00    7.50
 -11   9   3   51.99    7.80
 -10  -9   3    2.00    2.30
 -10   9   3    0.60    1.70
 -10   9   3   -0.20    1.40
 -10   9   3    0.40    1.80
   9  -9  -3   15.40    3.90
  -9  -9   3   20.60    5.10
  -9   9   3   36.20    6.90
   9   9  -3   21.10    5.90
  -9   9   3   19.80    4.90
   8  -9  -3   30.60    6.70
   8  -9  -3   34.20    5.50
  -8  -9   3   30.40    6.20
  -8   9   3   21.90    4.60
  -8   9   3   37.40    6.90
   8   9  -3   28.10    6.70
  -7  -9   3   -1.20    1.70
   7  -9  -3   -0.70    1.60
   7  -9  -3    2.10    1.80
  -7   9   3    1.80    2.00
  -7   9   3    5.40    2.80
   7   9  -3    2.10    2.50
  -6  -9   3   69.19    8.30
   6  -9  -3   70.49    9.60
   6  -9  -3   72.89    6.30
   6   9  -3   50.19    8.50
  -6   9   3   67.39    9.30
  -6   9   3   63.79    7.70
  -5  -9   3  260.27    8.80
   5  -9  -3  260.87   12.50
  -5  -9   3  255.37   13.20
   5  -9  -3  261.27   15.80
   5   9  -3  269.77   15.10
   5   9  -3  270.87    8.70
  -5   9   3  277.17   15.00
  -5   9   3  272.67   13.30
  -4  -9   3  249.88    9.60
  -4  -9   3  288.97   13.50
   4  -9  -3  289.77   16.40
   4  -9  -3  285.47   12.80
   4   9  -3  270.07   15.00
   4   9  -3  277.27    9.90
  -4   9   3  259.77   14.70
  -4   9   3  312.77   13.80
  -3  -9   3  268.67   10.20
   3  -9  -3  263.27   15.60
   3  -9  -3  255.07   12.30
  -3  -9   3  266.87   12.60
   3   9  -3  286.37   15.10
  -3   9   3  284.67   13.00
  -3   9   3  275.87   14.80
   3   9  -3  279.77   10.50
   2  -9  -3    3.90    2.10
  -2  -9   3    4.20    2.10
  -2  -9   3    1.90    1.40
   2   9  -3   -0.70    1.20
  -2   9   3    1.80    1.80
   2   9  -3    3.70    2.20
  -2   9   3    0.30    1.30
   1  -9  -3   41.40    5.60
  -1  -9   3   48.10    5.80
   1   9  -3   36.90    6.10
  -1   9   3   42.10    5.10
  -1   9   3   33.70    5.90
   1   9  -3   47.10    5.30
   0  -9   3    1.30    1.70
   0  -9  -3    0.80    1.40
   0   9  -3    1.10    2.10
   0   9  -3    2.30    1.60
   0   9   3    0.30    1.70
   0   9   3    2.40    1.70
  -1  -9  -3  251.97   11.90
   1  -9   3  233.98   10.50
  -1   9  -3  230.68   12.10
   1   9   3  226.28   10.40
  -1   9  -3  222.48   10.90
  -1   9  -3  245.28   13.50
   1   9   3  242.88   13.90
  -2  -9  -3    5.60    1.90
  -2  -9  -3    4.70    2.40
   2   9   3    6.50    2.90
  -2   9  -3    2.60    2.20
   2   9   3    6.10    2.20
  -2   9  -3    3.70    2.00
  -2   9  -3    5.90    2.10
  -3  -9  -3   50.09    6.60
   3  -9   3   40.70    5.50
  -3  -9  -3   32.00    3.80
  -3   9  -3   41.60    5.70
   3   9   3   47.40    5.00
  -3   9  -3   37.00    6.50
   3   9   3   42.50    7.30
  -3   9  -3   40.40    4.90
  -4  -9  -3  160.58   10.00
   4  -9   3  153.28    9.00
  -4   9  -3  136.99   10.20
   4   9   3  149.39    7.10
  -4   9  -3  139.89    9.10
  -4   9  -3  142.29    7.80
   4   9   3  149.29   11.30
   4   9   3  141.79    7.20
  -5  -9  -3  187.38   11.50
  -5   9  -3  210.98    9.60
   5   9   3  191.78   13.20
  -5   9  -3  210.28   11.50
   5   9   3  202.18    8.10
   5   9   3  195.68    7.80
  -5   9  -3  186.78   12.30
  -6  -9  -3    2.90    2.20
   6  -9   3    2.00    1.50
  -6   9  -3    2.20    1.60
  -6   9  -3    4.20    2.60
   6   9   3    2.30    1.00
   6   9   3    2.90    1.20
  -6   9  -3    1.60    2.20
   6   9   3    1.10    1.80
  -7  -9  -3    7.70    3.40
   7  -9   3    0.40    1.40
  -7   9  -3    6.90    2.80
  -7   9  -3    4.90    2.90
   7   9   3    3.00    0.70
   7   9   3    4.50    2.50
  -8  -9  -3   21.70    5.10
   8  -9   3   25.30    4.30
  -8   9  -3   19.20    4.70
  -8   9  -3   23.50    4.10
  -8   9  -3   18.50    4.40
  -9  -9  -3   45.60    7.40
  -9   9  -3   53.59    6.10
  -9   9  -3   64.29    8.40
  -9   9  -3   49.10    8.10
 -10  -9  -3    7.40    3.40
 -10   9  -3   10.40    4.40
 -10   9  -3   15.60    3.40
 -10   9  -3    8.70    3.40
 -11  -9  -3   19.60    5.60
 -11   9  -3   19.50    4.90
 -11   9  -3   14.70    3.40
 -11   9  -3   15.90    4.40
 -12  -9  -3    5.90    3.40
 -12   9  -3   -0.20    2.00
 -12   9  -3    2.40    1.90
 -11 -10   3   19.60    5.40
 -11  10   3   35.90    6.60
 -11  10   3   45.00    7.10
  11  10  -3   28.80    7.10
 -10 -10   3    1.50    2.60
  10 -10  -3    1.90    2.10
  10  10  -3   -0.50    1.50
 -10  10   3    1.10    2.30
 -10  10   3    4.40    2.80
 -10  10   3    2.70    2.70
   9 -10  -3   16.70    4.30
  -9 -10   3    5.90    3.20
  -9  10   3   17.00    4.60
  -9  10   3   11.00    4.90
   9  10  -3   11.70    4.40
   8 -10  -3   16.00    3.80
  -8 -10   3   21.50    5.10
  -8  10   3   19.50    5.30
  -8  10   3   20.10    4.80
   8  10  -3   29.30    6.80
   7 -10  -3   65.19    7.80
  -7 -10   3   70.09    8.90
  -7  10   3   80.49   11.00
  -7  10   3   60.69    7.80
   7  10  -3   67.19    8.90
   6 -10  -3    3.60    2.00
  -6 -10   3    3.30    2.80
   6  10  -3   -0.30    0.40
   6  10  -3    0.20    1.90
   6  10  -3    0.30    0.60
  -6  10   3   -0.40    1.30
  -6  10   3   -2.60    1.00
  -5 -10   3    1.50    1.90
   5 -10  -3   -0.60    1.40
   5  10  -3    0.30    2.00
   5  10  -3    0.20    0.70
  -5  10   3   -0.90    1.40
   5  10  -3    0.50    0.80
  -5  10   3   -0.40    1.40
  -4 -10   3  113.59    5.90
  -4 -10   3  113.79    8.40
   4 -10  -3  115.59    8.20
  -4  10   3  108.89    8.30
   4  10  -3  111.79    5.90
   4  10  -3  112.49   12.20
  -4  10   3  106.99    9.70
  -3 -10   3   78.19    6.80
   3 -10  -3   88.59    7.10
  -3 -10   3   84.09    5.40
  -3  10   3   98.59   11.30
  -3  10   3   84.59    7.10
   3  10  -3   72.29    9.30
   3  10  -3   89.69    5.60
  -2 -10   3   42.30    5.60
   2 -10  -3   36.50    5.40
  -2  10   3   51.49    6.20
   2  10  -3   41.10    7.00
  -2  10   3   30.00    5.80
   2  10  -3   37.10    4.60
   1 -10  -3   66.19    7.30
  -1 -10   3   67.89    5.90
   1  10  -3   54.79    7.30
   1  10  -3   71.39    5.60
  -1  10   3   60.99    6.60
   0 -10  -3  169.58   10.10
   0 -10   3  187.78    9.60
   0  10   3  157.68   11.60
   0  10   3  165.28    9.30
   0  10  -3  162.58    9.20
   0  10  -3  159.68   11.40
  -1 -10  -3   44.80    6.10
   1 -10   3   40.20    5.20
   1  10   3   39.00    5.00
  -1  10  -3   43.40    7.40
   1  10   3   49.20    8.00
  -1  10  -3   37.30    5.20
  -2 -10  -3    0.00    1.50
   2 -10   3    2.80    1.70
  -2  10  -3    0.00    1.50
  -2  10  -3    4.10    2.80
   2  10   3    3.20    1.80
   2  10   3    2.20    2.20
   3 -10   3    1.10    1.40
  -3 -10  -3   -1.10    1.40
  -3  10  -3   -0.20    1.60
   3  10   3    3.60    1.80
   3  10   3   -0.10    1.90
  -3  10  -3    1.90    2.30
  -4 -10  -3    6.90    2.90
   4 -10   3    6.70    2.20
   4  10   3    5.80    1.90
  -4  10  -3    5.90    2.70
   4  10   3    1.70    2.60
   4  10   3    7.40    2.20
  -4  10  -3    8.00    3.70
  -5 -10  -3  120.39    9.50
   5 -10   3  107.29    7.10
  -5  10  -3  126.19   10.30
   5  10   3  106.29    6.00
   5  10   3  109.19    5.90
  -5  10  -3  105.89    8.40
   5  10   3  100.99   11.70
  -6 -10  -3   31.40    5.80
   6 -10   3   33.50    4.90
  -6  10  -3   40.90    7.50
   6  10   3   38.90    2.80
  -6  10  -3   25.20    5.10
   6  10   3   37.80    2.90
   6  10   3   34.90    7.90
  -7 -10  -3    1.90    2.40
   7 -10   3   14.30    3.10
  -7  10  -3   11.00    3.90
  -7  10  -3    5.50    3.00
   7  10   3    5.90    3.40
   7  10   3    9.80    1.10
  -8 -10  -3    8.30    3.90
   8 -10   3   14.00    3.20
  -8  10  -3   14.60    4.50
  -8  10  -3   12.40    4.00
   8  10   3   24.30    6.60
  -9 -10  -3   -1.50    1.30
   9  10   3   -0.30    1.50
  -9  10  -3    0.60    1.20
  -9  10  -3   -1.50    1.30
  -9  10  -3   -0.30    1.50
 -10 -10  -3    0.80    2.00
  10  10   3    0.70    2.10
 -10  10  -3    0.90    1.50
 -10  10  -3   -1.00    1.40
 -10  10  -3   -1.10    2.00
  -9 -11   3   19.30    5.30
   9 -11  -3   15.30    4.20
  -9  11   3   16.90    5.50
   9  11  -3   33.40    7.50
  -9  11   3   17.40    5.30
   8 -11  -3    0.50    1.50
  -8 -11   3    1.50    2.20
  -8  11   3    1.30    2.10
   8  11  -3    1.70    2.60
  -8  11   3    1.60    2.60
   7 -11  -3    3.00    2.00
  -7 -11   3    5.20    3.00
  -7  11   3    2.30    2.60
  -7  11   3    7.00    3.70
   7  11  -3    4.20    3.50
   6 -11  -3   16.80    4.20
  -6 -11   3   15.40    4.20
   6  11  -3   11.20    4.40
  -6  11   3   14.70    4.00
  -6  11   3   22.90    5.20
   5 -11  -3   25.40    4.90
  -5 -11   3   31.10    6.00
   5  11  -3   25.70    3.00
  -5  11   3   24.70    5.20
   5  11  -3   28.70    6.60
  -5  11   3   30.70    6.80
   4 -11  -3    3.50    2.10
   4  11  -3   -0.50    1.60
  -4  11   3    0.30    1.70
  -4  11   3    0.40    1.90
   4  11  -3    3.80    1.60
  -3 -11   3   24.70    4.90
   3 -11  -3   27.50    4.90
  -3  11   3   23.50    4.60
   3  11  -3   18.90    3.30
   3  11  -3   16.90    5.00
  -3  11   3   24.90    6.10
  -2 -11   3   10.80    3.50
   2 -11  -3   16.70    4.10
  -2  11   3    8.80    2.90
   2  11  -3   11.30    2.80
   2  11  -3   13.60    4.80
  -2  11   3   20.70    5.60
   1 -11  -3  101.89    7.80
  -1 -11   3   77.69    6.70
   1  11  -3   72.19    6.10
  -1  11   3   89.99   11.00
  -1  11   3   74.99    7.80
   1  11  -3   79.89    9.30
   0 -11  -3    0.40    1.80
   0 -11   3    0.40    1.50
   0  11   3    1.20    2.30
   0  11  -3    2.70    2.00
   0  11  -3   -0.20    1.70
   0  11   3    2.80    2.10
  -1 -11  -3   36.30    5.90
   1 -11   3   28.40    4.60
  -1  11  -3   36.00    5.60
  -1  11  -3   20.50    4.80
   1  11   3   26.10    6.20
   1  11   3   39.30    5.20
  -2 -11  -3   67.19    9.30
   2 -11   3   48.90    5.90
   2  11   3   47.30    7.90
  -2  11  -3   51.49    7.70
   2  11   3   57.49    6.30
  -2  11  -3   59.19    7.20
  -3 -11  -3   88.09    9.40
   3 -11   3   92.19    6.80
  -3  11  -3   85.89    9.90
  -3  11  -3   94.29   11.10
   3  11   3  101.29    6.70
   3  11   3   80.89   10.30
   4 -11   3   16.50    3.50
  -4 -11  -3   31.20    5.90
   4  11   3   42.30    8.40
  -4  11  -3   31.50    7.00
  -4  11  -3   24.30    5.10
   4  11   3   24.20    3.80
   5 -11   3    7.20    2.40
  -5 -11  -3    6.00    3.10
  -5  11  -3    9.80    3.90
   5  11   3    4.50    3.30
  -5  11  -3   10.60    4.40
   5  11   3    8.70    2.10
   6 -11   3   19.30    3.80
  -6 -11  -3   15.90    4.40
   6  11   3   11.40    4.50
   6  11   3   13.40    2.20
  -6  11  -3   13.30    4.70
  -6  11  -3   10.30    3.70
   7 -11   3   32.40    4.90
  -7 -11  -3   29.30    6.30
  -7  11  -3   35.30    7.60
  -7  11  -3   23.30    5.30
   7  11   3   25.00    7.20
   8 -11   3    7.10    2.60
  -8 -11  -3    3.60    3.00
   8  11   3    3.40    3.30
  -8  11  -3    4.80    2.80
  -8  11  -3    5.00    3.50
  -9 -11  -3   21.20    7.40
   9  11   3   35.30    7.90
  -9  11  -3   39.70    5.30
  -9  11  -3   24.70    6.20
  -9  11  -3   39.90    7.10
   7 -12  -3    3.80    2.30
  -7 -12   3    3.60    2.80
  -7  12   3    5.20    3.70
  -7  12   3   -0.60    2.70
   7  12  -3    6.60    3.80
  -6 -12   3   16.50    4.40
   6 -12  -3   22.40    4.80
   6  12  -3   14.00    5.10
  -6  12   3   19.00    5.50
  -6  12   3   10.20    3.50
  -5 -12   3   -1.60    1.40
   5 -12  -3    2.80    2.20
  -5  12   3    0.60    1.90
  -5  12   3    2.10    2.40
   5  12  -3    2.40    2.10
   5  12  -3   -0.40    0.80
   4 -12  -3   65.29    8.00
  -4 -12   3   69.29    8.30
  -4  12   3   62.89    8.30
   4  12  -3   59.89    9.70
  -4  12   3   57.19    9.10
   4  12  -3   72.49    5.10
  -3 -12   3    8.20    3.10
   3 -12  -3   -1.70    1.10
   3  12  -3    0.70    1.30
   3  12  -3    0.70    2.20
  -3  12   3    1.40    2.20
  -3  12   3   -1.40    1.20
   2 -12  -3    1.80    1.80
   2  12  -3   -1.00    1.10
  -2  12   3    2.50    2.80
  -2  12   3    1.30    2.00
   2  12  -3    1.10    2.10
   1 -12  -3    4.00    2.50
  -1 -12   3    5.10    2.40
   1  12  -3    2.00    1.80
  -1  12   3    6.10    2.80
  -1  12   3    2.90    2.70
   1  12  -3    2.50    2.20
   0 -12  -3   48.50    6.80
   0 -12   3   62.29    7.20
   0  12   3   54.09    6.60
   0  12  -3   50.29    6.60
   0  12  -3   58.59    8.90
   0  12   3   64.49   10.00
   1 -12   3   11.90    3.20
  -1 -12  -3   12.20    3.70
   1  12   3    8.70    4.00
  -1  12  -3   13.40    4.90
   1  12   3   11.40    3.30
   2 -12   3   42.10    5.90
  -2 -12  -3   45.10    6.90
  -2  12  -3   44.70    7.80
  -2  12  -3   64.99    8.00
   2  12   3   45.80    5.60
   2  12   3   59.59    9.40
   3 -12   3   11.30    3.10
  -3 -12  -3    8.20    3.40
  -3  12  -3    6.90    3.50
  -3  12  -3    8.30    3.50
   3  12   3    5.00    3.20
   3  12   3    6.00    2.30
   4 -12   3    9.30    3.00
  -4 -12  -3    1.50    2.40
   4  12   3    9.00    2.50
  -4  12  -3    6.40    3.70
  -4  12  -3    3.30    2.70
   4  12   3    3.10    3.30
  -5 -12  -3    0.30    1.70
   5 -12   3    0.60    1.30
  -5  12  -3    0.20    1.80
  -5  12  -3   -1.00    1.40
   5  12   3    0.30    2.90
   5  12   3    0.30    1.00
   6 -12   3    1.10    1.30
  -6 -12  -3    1.10    2.10
   6  12   3    4.20    3.20
  -6  12  -3    0.00    2.10
  -6  12  -3    0.20    1.60
   7 -12   3   21.10    4.10
  -7 -12  -3   15.40    5.10
  -7  12  -3    9.50    3.80
   7  12   3   11.90    4.90
  -5  13   3    7.50    4.60
   5  13  -3    5.80    3.60
  -4 -13   3    0.70    1.90
   4 -13  -3    2.00    2.00
   4  13  -3    3.50    1.70
  -4  13   3   -1.50    1.90
   4  13  -3    3.70    3.00
  -4  13   3    3.80    2.70
   3 -13  -3   45.30    6.90
  -3 -13   3   40.00    6.50
  -3  13   3   44.90    7.00
   3  13  -3   39.30    7.60
  -3  13   3   39.90    7.90
   3  13  -3   49.40    5.80
   2 -13  -3    4.90    2.60
  -2 -13   3    8.30    3.00
   2  13  -3    9.40    3.00
   2  13  -3    6.10    3.30
  -2  13   3   11.70    3.60
  -2  13   3   11.10    4.80
  -1 -13   3   36.70    6.20
   1 -13  -3   30.30    5.90
  -1  13   3   26.10    6.60
   1  13  -3   31.30    6.80
  -1  13   3   32.60    5.70
   0 -13   3    2.80    2.10
   0 -13  -3    1.30    2.00
   0  13   3    1.70    2.90
   0  13  -3    0.70    1.70
   0  13  -3   -1.00    1.60
   0  13   3   -2.10    1.00
  -1 -13  -3   21.00    4.90
   1 -13   3   21.60    5.20
   1  13   3   10.30    4.40
  -1  13  -3    8.20    3.80
   1  13   3   15.30    3.80
  -1  13  -3   18.30    4.10
   2 -13   3   -1.00    1.20
  -2 -13  -3    2.80    2.40
  -2  13  -3    0.20    1.80
  -2  13  -3    0.70    2.60
   2  13   3    0.40    2.00
   2  13   3    0.40    1.40
  -3 -13  -3    1.10    2.10
   3 -13   3    2.60    1.90
  -3  13  -3    2.60    2.80
  -3  13  -3    5.60    3.00
   3  13   3    9.60    2.90
   3  13   3    8.40    4.10
  -4 -13  -3    0.40    2.20
   4 -13   3    0.90    1.60
  -4  13  -3    0.40    2.20
  -4  13  -3   -0.40    1.60
   4  13   3    1.10    1.50
   4  13   3    3.70    3.40
 -16   0   4   12.50    4.60
 -16   0   4   18.20    3.20
 -15   0   4    0.50    1.20
 -15   0   4    1.70    2.50
  14   0  -4  373.26   18.70
 -14   0   4  398.66   19.80
 -14   0   4  383.76   14.10
  13   0  -4    1.10    1.40
 -13   0   4   -0.70    0.80
 -13   0   4   -1.30    1.70
 -12   0   4  170.28   11.60
  12   0  -4  176.28   10.80
  12   0  -4  184.68    8.70
  11   0  -4    0.70    1.00
 -11   0   4   -0.40    1.60
 -11   0   4   -1.20    0.70
  11   0  -4    0.20    1.00
 -10   0   4  554.64   16.80
 -10   0   4  557.04   21.10
  10   0  -4  523.25   17.00
  -9   0   4    2.20    1.70
  -9   0   4   -0.50    0.50
   9   0  -4    0.50    0.80
  -8   0   4  222.08    8.10
   8   0  -4  203.18    8.00
  -8   0   4  222.38   10.70
  -8   0   4  190.38    9.90
  -7   0   4    1.80    0.80
  -7   0   4    1.10    1.10
  -7   0   4    0.20    0.80
   7   0  -4   -0.10    0.60
  -6   0   4 7214.08  177.98
   6   0  -4 7296.77  178.68
  -6   0   4 7648.13  190.28
  -6   0   4 7413.86  188.88
  -5   0   4    0.10    0.40
   5   0  -4    0.70    0.50
  -5   0   4   -0.10    0.60
  -5   0   4    1.10    0.90
   5   0  -4    1.00    0.70
  -4   0   4 5624.74  143.49
  -4   0   4 5588.44  135.29
   4   0  -4 5696.93  135.69
  -4   0   4 5624.04  142.59
  -3   0   4    0.80    0.70
   3   0  -4    0.70    0.50
   3   0  -4    0.50    0.40
  -3   0   4    1.30    0.80
  -3   0   4    0.80    0.50
  -2   0   4  397.76   13.00
  -2   0   4  388.46   15.40
   2   0  -4  419.26   13.10
   2   0  -4  363.46   15.10
   1   0  -4    1.20    0.20
  -1   0   4    0.80    0.20
  -1   0   4    1.00    0.40
  -1   0   4    0.20    0.30
  -1   0   4    0.50    0.30
   1   0  -4    0.80    0.40
   1   0  -4    0.60    0.30
   0   0   4  707.93   19.90
   0   0   4  695.73   19.30
   0   0  -4  709.73   19.90
   0   0  -4  686.63   19.30
   1   0   4   -0.10    0.20
  -1   0  -4    0.20    0.20
   1   0   4    0.30    0.30
  -1   0  -4    0.90    0.40
   2   0   4 9958.10  233.28
  -3   0  -4    0.80    0.50
   3   0   4    1.20    0.60
  -3   0  -4    1.00    0.60
   4   0   4 7016.50  174.98
   4   0   4 7157.48  172.18
  -4   0  -4 7146.08  172.18
  -4   0  -4 7313.67  175.58
   5   0   4    1.00    0.80
  -5   0  -4    0.60    0.80
  -5   0  -4    0.00    0.80
   5   0   4    0.90    0.70
  -6   0  -4  274.97   10.30
  -6   0  -4  259.27    9.00
   6   0   4  254.17    9.00
   6   0   4  258.57   10.00
  -7   0  -4    0.80    0.90
   7   0   4   -0.50    0.70
   7   0   4    2.50    1.40
  -7   0  -4    1.20    1.30
   8   0   4  130.99    7.60
   8   0   4  154.88    8.60
  -8   0  -4  153.28    6.80
  -8   0  -4  136.19    7.80
   8   0   4  138.59    6.60
   9   0   4    0.20    0.80
  -9   0  -4   -0.30    0.80
  -9   0  -4   -0.80    1.00
  10   0   4  381.76   13.80
  10   0   4  389.46   16.60
 -10   0  -4  416.46   16.40
 -10   0  -4  379.96   13.70
 -11   0  -4   -0.90    1.00
  11   0   4   -0.10    1.10
 -11   0  -4   -0.90    1.20
 -12   0  -4  641.14   24.10
 -12   0  -4  623.24   20.40
  12   0   4  648.34   25.10
 -13   0  -4    5.80    2.70
  13   0   4    2.00    2.30
 -13   0  -4    3.30    1.80
 -14   0  -4    8.80    2.50
 -14   0  -4    9.90    3.80
 -15   0  -4    0.90    1.60
 -15   0  -4   -0.40    1.90
 -16  -1   4   11.70    7.00
 -16   1   4    9.40    4.20
 -16   1   4   15.60    3.30
 -15  -1   4  333.47   18.60
 -15   1   4  343.37   18.60
 -15   1   4  311.97   13.40
 -14  -1   4    1.00    1.10
 -14  -1   4    2.60    3.00
 -14   1   4    1.20    1.40
  14   1  -4    2.80    2.00
 -14   1   4    7.30    3.40
  13  -1  -4   36.20    6.30
 -13  -1   4   35.40    3.80
 -13  -1   4   43.00    7.00
 -13   1   4   34.30    4.50
  13   1  -4   28.60    5.00
  12  -1  -4   21.10    4.70
 -12  -1   4   23.00    5.20
 -12  -1   4   23.00    3.10
 -12   1   4   22.30    4.90
  12   1  -4   26.00    3.40
 -12   1   4   17.70    3.20
 -11  -1   4   40.30    6.40
 -11  -1   4   31.30    3.40
  11  -1  -4   31.60    5.40
 -11   1   4   27.00    5.10
 -11   1   4   37.70    4.50
  11   1  -4   35.20    3.70
 -10  -1   4   78.19    8.70
 -10  -1   4   60.59    3.80
  10  -1  -4   69.29    7.60
  10  -1  -4   63.99    4.80
 -10   1   4   61.99    4.60
  10   1  -4   58.19    3.90
 -10   1   4   63.99    7.40
  -9  -1   4  151.18    9.20
  -9  -1   4  126.59    5.50
   9  -1  -4  127.99    7.80
  -9   1   4  125.79    6.50
  -9   1   4  130.49    8.40
   9   1  -4  129.19    5.70
   8  -1  -4    0.40    0.70
   8  -1  -4    0.30    0.90
  -8  -1   4    0.80    1.30
  -8  -1   4    2.10    0.90
  -8   1   4    5.10    2.00
   8   1  -4    1.20    0.80
  -8   1   4    2.50    1.80
  -8   1   4    0.80    0.90
  -7   1   4 2040.60   53.19
   7   1  -4 2033.40   53.59
  -6  -1   4  167.58    5.70
  -6  -1   4  174.58    8.40
   6  -1  -4  173.38    7.00
  -6   1   4  165.18    6.80
   6   1  -4  178.88    5.90
   6   1  -4  165.98    8.10
  -6   1   4  171.78    8.00
  -6   1   4  164.78    8.10
   5  -1  -4    4.20    1.20
  -5  -1   4    6.30    1.10
  -5  -1   4    5.30    1.70
   5   1  -4    5.50    0.90
   5   1  -4    6.80    1.80
  -5   1   4    8.20    1.50
  -5   1   4    8.50    2.10
  -5   1   4    3.60    1.40
   4  -1  -4    2.60    1.00
   4  -1  -4    2.50    0.90
  -4  -1   4    1.90    1.10
  -4  -1   4    2.00    0.50
   4  -1  -4    0.70    0.90
  -4   1   4    1.30    0.60
   4   1  -4    1.80    0.50
  -4   1   4    0.90    0.80
   4   1  -4    1.40    0.90
  -4   1   4    0.70    0.60
   3   1  -4  591.84   16.80
  -2  -1   4    8.50    1.40
   2  -1  -4   13.00    1.50
   2  -1  -4   12.00    1.60
  -2  -1   4   13.10    0.90
   2  -1  -4   13.30    1.50
  -2   1   4   11.40    1.50
  -2   1   4   11.10    1.30
   2   1  -4   12.70    0.80
   2   1  -4   10.90    1.50
  -2   1   4   11.10    1.30
  -1  -1   4   30.50    1.50
   1  -1  -4   33.80    1.90
   1  -1  -4   30.60    1.90
  -1  -1   4   32.30    1.80
   1  -1  -4   30.90    1.80
  -1   1   4   33.90    1.90
   1   1  -4   29.00    1.70
   1   1  -4   32.40    1.50
  -1   1   4   37.80    2.10
   1   1  -4   32.00    1.50
  -1   1   4   30.10    1.80
   0  -1  -4  153.88    5.00
   0  -1   4  154.08    4.70
   0  -1   4  149.88    4.10
   0  -1   4  146.69    4.10
   0   1  -4  153.98    4.70
   0   1   4  155.38    4.80
   0   1   4  155.08    5.00
   0   1  -4  143.89    4.50
   0   1   4  139.49    4.80
   1  -1   4 1293.47   34.90
  -1  -1  -4 1289.07   34.20
   1   1   4 1251.87   35.40
   1   1   4 1288.37   33.90
  -1   1  -4 1285.97   35.00
  -2  -1  -4  150.18    5.50
   2  -1   4  150.88    5.70
   2  -1   4  156.58    4.50
  -2  -1  -4  149.59    5.30
  -2   1  -4  158.68    5.50
   2   1   4  158.68    5.00
  -2   1  -4  152.88    5.70
   2   1   4  152.18    5.50
  -2   1  -4  155.68    4.60
   3  -1   4  169.48    6.70
  -3  -1  -4  170.08    5.60
  -3  -1  -4  167.58    6.50
   3  -1   4  167.38    5.60
   3  -1   4  172.48    6.20
   3   1   4  165.78    6.40
  -3   1  -4  177.78    6.30
   3   1   4  180.58    5.70
  -3   1  -4  170.88    5.70
   4  -1   4  904.71   25.00
   5  -1   4 2304.27   63.89
  -5  -1  -4 2282.37   60.79
  -5  -1  -4 2409.16   68.69
   5  -1   4 2243.18   64.79
  -5   1  -4 2268.97   63.99
   5   1   4 2199.18   67.69
   5   1   4 2319.07   60.89
  -5   1  -4 2333.07   65.29
  -6  -1  -4   10.40    2.20
   6  -1   4   12.30    2.20
  -6  -1  -4   15.10    2.10
   6  -1   4    7.60    1.80
   6  -1   4   10.50    1.90
  -6   1  -4   17.30    2.60
  -6   1  -4   13.80    2.50
   6   1   4   11.10    1.80
   6   1   4    8.80    2.10
   7  -1   4   10.20    2.50
  -7  -1  -4    9.50    2.40
  -7  -1  -4    9.90    1.80
   7  -1   4   10.50    2.30
   7  -1   4   15.50    2.50
  -7   1  -4    9.10    1.90
   7   1   4    9.80    1.80
  -7   1  -4    9.50    2.20
  -8  -1  -4   77.69    4.40
   8  -1   4   85.59    5.90
  -8  -1  -4   86.89    7.10
   8   1   4   79.89    4.50
  -8   1  -4   89.59    5.30
  -8   1  -4   76.69    5.60
   8   1   4   94.99    6.30
   9  -1   4   14.40    2.70
   9  -1   4   20.90    4.40
  -9  -1  -4   17.80    2.60
  -9  -1  -4   15.90    3.50
   9   1   4   17.10    2.60
  -9   1  -4   17.80    3.40
  -9   1  -4   17.60    3.10
  10  -1   4  142.59    9.50
 -10  -1  -4  152.98    9.40
 -10  -1  -4  142.49    6.90
 -10   1  -4  148.29    7.80
  10   1   4  159.68    7.20
 -10   1  -4  157.38    9.20
 -11  -1  -4   48.90    6.40
  11  -1   4   49.90    7.20
 -11  -1  -4   45.50    4.60
 -11   1  -4   35.60    4.60
  11   1   4   42.60    6.30
 -11   1  -4   38.20    5.60
  11   1   4   47.40    4.00
 -12  -1  -4  201.58   12.00
 -12  -1  -4  181.58    8.60
  12  -1   4  179.38   11.90
  12   1   4  179.08   11.70
  12   1   4  187.68    8.80
 -12   1  -4  205.98   11.60
 -12   1  -4  199.48    9.80
 -13  -1  -4  413.76   14.90
  13  -1   4  414.46   22.10
 -13   1  -4  441.96   19.10
 -13   1  -4  431.66   16.50
  13   1   4  432.66   20.10
 -14  -1  -4   37.00    4.50
 -14  -1  -4   36.90    6.70
 -14   1  -4   45.70    7.30
 -14   1  -4   40.30    5.40
 -15  -1  -4   42.80    7.60
 -15  -1  -4   28.70    4.00
 -15   1  -4   35.30    5.20
 -15   1  -4   37.00    6.40
 -16  -2   4   -0.20    2.10
 -16   2   4    0.00    2.00
 -16   2   4    0.90    1.40
 -15  -2   4   42.00    7.90
 -15   2   4   41.40    7.60
 -15   2   4   40.20    5.60
 -14  -2   4  114.39   12.10
 -14  -2   4   99.29    4.60
 -14   2   4  103.49    7.30
 -14   2   4  128.19   13.00
 -13  -2   4    2.80    2.50
 -13  -2   4    2.80    1.10
  13  -2  -4    3.70    2.50
  13   2  -4    0.30    0.80
  13   2  -4    2.60    1.10
 -13   2   4    3.90    1.80
 -12  -2   4   32.70    6.30
 -12  -2   4   26.30    2.60
  12  -2  -4   30.50    5.70
 -12   2   4   21.10    3.70
  12   2  -4   21.90    2.60
 -12   2   4   28.90    5.90
 -11  -2   4    2.00    2.20
 -11  -2   4    2.40    0.90
  11  -2  -4    2.10    1.60
 -11   2   4    3.50    2.20
 -11   2   4    2.60    1.50
  11   2  -4    1.50    0.90
  10  -2  -4   11.50    2.90
 -10  -2   4   14.40    1.90
 -10  -2   4   14.70    3.90
 -10   2   4   18.90    4.20
  10   2  -4   15.10    1.90
 -10   2   4   15.70    3.10
   9  -2  -4    1.00    1.10
   9  -2  -4    0.70    1.20
  -9  -2   4    0.30    0.60
  -9  -2   4    0.40    1.40
  -9   2   4    1.40    1.50
   9   2  -4    0.40    0.70
  -8  -2   4   26.40    1.80
  -8  -2   4   35.80    5.20
   8  -2  -4   35.30    4.30
   8  -2  -4   36.80    5.20
  -8   2   4   29.00    4.90
  -8   2   4   24.60    3.90
  -8   2   4   37.50    4.40
   8   2  -4   30.10    1.90
  -7  -2   4  957.50   24.40
   7  -2  -4  999.50   28.80
   7  -2  -4  971.90   27.40
  -7  -2   4 1027.20   30.00
  -7   2   4 1008.50   28.70
  -7   2   4  964.00   27.10
   7   2  -4  937.71   29.30
  -7   2   4 1003.70   29.10
   7   2  -4  967.40   23.90
   6  -2  -4  817.62   23.80
  -6  -2   4  894.31   26.10
   6  -2  -4  864.01   25.00
   6   2  -4  816.52   25.40
  -6   2   4  876.41   25.40
  -6   2   4  838.52   24.50
  -6   2   4  866.41   24.90
   4  -2  -4  138.29    6.20
  -4  -2   4  127.09    3.30
  -4  -2   4  122.59    6.20
  -4  -2   4  128.29    3.30
   4  -2  -4  125.89    5.60
   4   2  -4  111.59    5.90
  -4   2   4  122.79    5.80
  -4   2   4  123.89    5.50
  -4   2   4  123.99    5.70
   3  -2  -4  269.07    9.00
   3  -2  -4  269.17    8.70
  -3  -2   4  255.27    9.10
  -3  -2   4  250.17    6.40
  -3  -2   4  253.77    6.40
  -3   2   4  260.37    8.80
  -3   2   4  265.37    8.70
   3   2  -4  243.58    8.90
  -3   2   4  248.68    8.70
   2  -2  -4  953.10   29.90
  -2  -2   4  976.80   24.80
   2  -2  -4  947.01   30.90
  -2  -2   4  946.61   30.80
  -2   2   4  891.21   30.30
   2   2  -4  994.30   33.50
  -2   2   4  992.60   30.10
   2   2  -4  954.70   24.70
  -1  -2   4  995.60   27.30
   1  -2  -4 1008.50   31.20
   1  -2  -4 1004.40   31.90
  -1   2   4 1022.60   30.30
   1   2  -4  999.10   29.70
   1   2  -4 1027.00   27.40
  -1   2   4 1022.30   33.70
   0  -2   4   17.80    1.70
   0  -2   4    9.80    1.30
   0  -2  -4    9.90    1.30
   0  -2  -4   11.00    1.50
   0  -2   4   12.20    0.90
   0   2  -4   16.40    1.30
   0   2  -4   16.00    1.80
   0   2   4   14.00    1.60
   0   2  -4   13.30    1.00
   1  -2   4  555.14   15.40
  -2  -2  -4 1024.30   33.40
  -2  -2  -4 1032.40   29.00
   2  -2   4 1025.30   26.70
   2  -2   4 1019.20   31.60
   2   2   4 1030.80   33.30
  -2   2  -4 1019.70   31.70
   2   2   4  993.90   28.60
  -2   2  -4 1045.50   26.50
   3  -2   4 1603.64   46.70
  -3  -2  -4 1640.64   49.30
  -3  -2  -4 1601.34   42.60
  -3   2  -4 1614.54   42.80
  -3   2  -4 1593.54   42.30
   3   2   4 1584.74   42.40
  -3   2  -4 1642.14   47.00
   3   2   4 1600.84   49.00
   4  -2   4   14.80    3.10
  -4  -2  -4   11.70    1.50
  -4  -2  -4    7.00    1.90
   4  -2   4    6.10    1.50
   4   2   4   10.60    1.40
  -4   2  -4    8.80    1.50
  -4   2  -4    8.50    2.00
   4   2   4   11.90    2.20
  -4   2  -4    9.30    1.40
  -4   2  -4   10.60    1.80
  -5  -2  -4  111.69    4.40
   5  -2   4  115.39    5.60
  -5  -2  -4   99.69    5.80
   5  -2   4  120.39    6.50
  -5   2  -4  108.19    5.00
   5   2   4  108.19    6.00
  -5   2  -4   99.79    5.30
   5   2   4  103.69    4.20
  -5   2  -4  111.09    5.00
   6  -2   4 1230.28   32.40
   6  -2   4 1224.58   34.20
  -6   2  -4 1218.58   31.90
   6   2   4 1146.39   33.50
  -7  -2  -4   92.79    6.30
   7  -2   4   86.09    5.30
  -7  -2  -4   87.19    4.20
   7   2   4   89.39    4.20
  -7   2  -4   78.39    5.10
  -7   2  -4   87.09    5.20
   7   2   4   90.39    6.20
  -7   2  -4   91.19    5.40
  -8  -2  -4  207.28    7.60
   8  -2   4  214.38   10.90
   8  -2   4  187.28    8.90
  -8  -2  -4  212.28   10.50
  -8   2  -4  222.28    9.80
  -8   2  -4  196.18    9.10
  -8   2  -4  215.48   10.50
   8   2   4  202.78    7.50
  -9  -2  -4    3.20    2.20
   9  -2   4    3.30    2.00
  -9  -2  -4    1.90    1.00
  -9   2  -4    2.30    1.70
   9   2   4    4.20    1.20
  -9   2  -4    4.00    1.80
  -9   2  -4    4.10    1.70
 -10  -2  -4   12.90    3.50
  10  -2   4   10.10    2.70
 -10  -2  -4   12.40    2.30
 -10   2  -4   10.10    2.70
  10   2   4   15.00    2.40
 -10   2  -4   14.60    3.40
 -11  -2  -4  259.07   13.60
  11  -2   4  271.87   14.40
 -11  -2  -4  253.87    9.60
 -11   2  -4  279.97   13.10
  11   2   4  243.48    9.60
 -11   2  -4  239.58   11.30
 -12  -2  -4   28.40    3.50
 -12  -2  -4   27.90    5.50
 -12   2  -4   24.00    4.10
 -12   2  -4   33.10    5.30
  12   2   4   25.20    5.30
 -13  -2  -4   53.99    4.10
 -13  -2  -4   53.59    7.60
  13  -2   4   59.29    8.60
  13   2   4   48.00    4.00
 -13   2  -4   33.80    5.90
  13   2   4   42.40    7.20
 -13   2  -4   41.70    5.50
 -14  -2  -4   76.59    9.70
 -14   2  -4   66.69    7.20
 -14   2  -4   79.09   10.30
 -15  -2  -4    1.60    2.60
 -15  -2  -4    3.30    1.40
 -15   2  -4    0.30    1.40
 -15   2  -4    3.80    3.00
 -15  -3   4    1.50    2.60
 -15   3   4    0.80    2.20
 -15   3   4    4.60    2.20
 -14  -3   4   76.89   10.10
 -14   3   4   85.19   10.20
 -14   3   4   88.69    9.60
 -13  -3   4  196.48   13.20
  13  -3  -4  158.08   11.60
 -13   3   4  164.08    9.60
 -12  -3   4  117.09   13.40
 -12   3   4  117.49    7.70
 -12   3   4  114.69    9.10
  11  -3  -4  382.86   17.70
 -11  -3   4  448.36   19.20
 -11   3   4  394.56   15.60
 -11   3   4  390.76   17.40
  10  -3  -4   88.99    7.20
 -10  -3   4   87.19    9.10
 -10   3   4   80.69    6.80
 -10   3   4   71.19    5.70
   9  -3  -4    9.30    3.00
  -9  -3   4    8.60    2.90
  -9   3   4    5.20    2.20
  -9   3   4    5.10    2.00
   8  -3  -4  334.17   14.20
  -8  -3   4  352.46   15.00
   8  -3  -4  342.47   14.50
  -8   3   4  338.67   12.90
  -8   3   4  345.77   15.10
  -8   3   4  334.37   14.00
   7  -3  -4   12.60    2.50
  -7  -3   4   18.40    3.70
   7  -3  -4   19.40    3.60
   7  -3  -4   15.00    3.10
   7   3  -4   15.50    3.80
  -7   3   4   15.00    3.00
  -7   3   4   13.40    2.60
  -7   3   4   12.80    2.70
  -7   3   4   12.50    2.80
   6  -3  -4  361.36   13.80
   6  -3  -4  370.46   14.20
  -6  -3   4  360.86   14.20
   6  -3  -4  387.56   13.80
  -6   3   4  364.76   13.20
  -6   3   4  351.06   13.30
  -6   3   4  364.16   12.80
   6   3  -4  370.26   14.20
   5  -3  -4  658.53   20.20
  -5  -3   4  642.94   20.30
   5  -3  -4  629.64   19.20
   5  -3  -4  647.64   19.60
   5   3  -4  620.44   20.10
  -5   3   4  637.84   19.70
  -5   3   4  641.84   19.10
  -5   3   4  656.23   19.40
   4  -3  -4  135.49    6.80
   4  -3  -4  134.79    6.40
  -4  -3   4  141.09    6.90
   4  -3  -4  148.49    6.60
   4   3  -4  131.49    6.70
  -4   3   4  134.99    6.60
  -4   3   4  144.69    6.40
  -4   3   4  144.79    6.40
  -3  -3   4 2142.49   62.69
  -3  -3   4 2112.09   50.89
   3  -3  -4 2149.39   61.69
   3  -3  -4 2048.90   59.99
   3   3  -4 2118.19   62.69
  -3   3   4 2111.39   60.99
  -3   3   4 2141.99   60.39
   3   3  -4 2137.99   50.79
   2  -3  -4   66.79    3.80
  -2  -3   4   69.79    2.70
   2  -3  -4   74.89    4.40
   2  -3  -4   67.69    3.90
  -2  -3   4   62.69    3.70
   2   3  -4   71.49    4.20
  -2   3   4   66.19    3.80
  -2   3   4   69.79    3.90
  -2   3   4   65.89    4.10
   2   3  -4   73.19    2.70
   2   3  -4   67.49    3.90
   1  -3  -4   55.59    3.40
  -1  -3   4   54.69    3.00
  -1  -3   4   59.59    2.70
   1  -3  -4   57.69    3.30
   1  -3  -4   62.29    4.00
   1   3  -4   58.99    2.70
  -1   3   4   54.09    3.20
  -1   3   4   55.69    3.70
   1   3  -4   63.19    3.70
   1   3  -4   52.19    3.00
  -1   3   4   56.99    3.40
   0  -3   4  145.19    5.30
   0  -3  -4  142.39    5.90
   0  -3  -4  134.09    5.30
   0  -3   4  136.59    6.00
   0   3  -4  138.99    4.90
   0   3   4  148.19    6.60
   0   3  -4  141.69    5.30
   0   3   4  145.89    5.90
   0   3   4  147.99    5.50
   0   3  -4  146.99    6.10
  -1  -3  -4    3.60    1.10
   1  -3   4    3.80    0.70
  -1  -3  -4    2.50    0.90
   1  -3   4    1.60    0.80
   1  -3   4    3.50    1.20
  -1   3  -4    1.80    0.50
  -1   3  -4    3.90    1.20
   1   3   4    2.60    1.10
   1   3   4    3.10    0.90
  -1   3  -4    1.60    0.80
   2  -3   4  358.06   11.30
   2  -3   4  371.66    9.70
  -2  -3  -4  367.26   11.90
   2  -3   4  359.76   12.20
  -2   3  -4  369.76    9.70
   2   3   4  359.66   11.90
  -2   3  -4  353.06   11.90
  -2   3  -4  357.06   11.30
   2   3   4  357.26   10.30
   3  -3   4   40.10    3.40
   3  -3   4   41.70    3.10
  -3  -3  -4   43.60    3.40
  -3   3  -4   40.90    3.40
   3   3   4   45.50    2.40
  -3   3  -4   44.60    2.30
   3   3   4   41.10    3.30
  -3   3  -4   42.40    3.10
   3   3   4   44.10    2.30
   4  -3   4   23.30    3.60
  -4  -3  -4   19.30    1.60
   4  -3   4   15.20    2.30
  -4  -3  -4   19.00    3.00
  -4   3  -4   19.90    2.80
  -4   3  -4   14.70    2.40
   4   3   4   22.30    3.30
  -4   3  -4   20.10    1.70
   4   3   4   18.50    1.50
   4   3   4   19.00    1.60
  -4   3  -4   20.60    2.20
  -5  -3  -4  551.54   14.60
   5  -3   4  554.14   18.40
  -5  -3  -4  552.74   18.00
   5  -3   4  563.44   17.10
  -5   3  -4  536.45   17.80
  -5   3  -4  547.05   15.80
  -5   3  -4  535.15   17.00
  -5   3  -4  541.15   15.50
   5   3   4  527.15   17.80
   6  -3   4   87.99    5.50
   6  -3   4   86.29    6.20
  -6  -3  -4   79.69    5.90
  -6  -3  -4   80.49    3.70
   6   3   4   76.89    5.70
   6   3   4   83.69    3.70
  -6   3  -4   87.39    4.70
  -6   3  -4   82.49    4.80
  -6   3  -4   84.19    5.90
  -6   3  -4   85.59    5.40
   7  -3   4   13.30    2.80
   7  -3   4    5.30    1.90
  -7  -3  -4    6.20    1.20
  -7  -3  -4    8.10    2.50
   7   3   4    6.70    1.30
  -7   3  -4    6.10    1.80
  -7   3  -4    5.40    1.70
   7   3   4    4.10    2.00
   8  -3   4   23.80    4.00
  -8  -3  -4   31.20    2.30
  -8  -3  -4   35.40    5.20
   8   3   4   32.50    2.30
  -8   3  -4   39.40    4.70
  -8   3  -4   33.90    4.20
  -8   3  -4   36.10    4.60
  -9  -3  -4  138.99    5.60
  -9  -3  -4  133.19    8.80
   9  -3   4  108.89    8.30
  -9   3  -4  128.79    7.70
  -9   3  -4  124.59    7.20
   9   3   4  132.09    5.50
  -9   3  -4  139.09    7.80
  10  -3   4   41.40    5.90
 -10  -3  -4   44.10    3.00
 -10  -3  -4   46.20    6.70
 -10   3  -4   33.00    4.70
  10   3   4   37.80    2.80
 -10   3  -4   39.60    5.20
  11  -3   4    0.20    1.70
 -11  -3  -4    1.80    2.10
 -11  -3  -4    0.70    0.80
  11   3   4    1.20    0.80
 -11   3  -4    0.00    1.30
 -11   3  -4   -0.60    1.20
 -12  -3  -4   43.20    3.20
  12  -3   4   48.20    7.50
 -12  -3  -4   46.10    7.60
  12   3   4   46.00    3.40
 -12   3  -4   51.09    6.80
 -12   3  -4   43.60    5.60
 -13  -3  -4    3.80    2.90
 -13  -3  -4    1.80    1.00
 -13   3  -4    6.50    2.60
 -13   3  -4    2.60    2.00
  13   3   4    3.70    1.30
 -14  -3  -4  137.09    6.10
 -14  -3  -4  152.68   11.80
 -14   3  -4  161.88   10.00
 -15  -3  -4    8.30    3.90
 -15   3  -4    8.70    3.40
 -15   3  -4    5.10    2.50
 -15  -4   4    1.70    4.20
 -15   4   4    0.90    2.30
 -15   4   4    0.10    1.50
 -14  -4   4    5.10    3.10
 -14   4   4    6.60    3.10
 -14   4   4    5.80    2.60
 -13  -4   4   34.80    7.10
  13  -4  -4   28.30    9.20
 -13   4   4   28.20    5.70
  12  -4  -4    1.80    1.70
 -12  -4   4    0.70    1.90
 -12   4   4    1.50    2.30
 -12   4   4    3.10    2.00
  11  -4  -4   81.29    9.80
 -11  -4   4   74.59    8.80
 -11   4   4   66.79    7.10
 -11   4   4   94.29    9.50
  10  -4  -4   65.99    8.50
 -10  -4   4   69.09    8.30
 -10   4   4   59.19    6.50
 -10   4   4   61.89    7.40
   9  -4  -4  264.37   14.80
  -9  -4   4  249.08   13.10
  -9   4   4  247.78   11.50
  -9   4   4  268.87   12.60
  -9   4   4  254.37   12.50
  -8  -4   4   84.89    7.00
   8  -4  -4   97.09    8.30
  -8   4   4   89.09    6.10
  -8   4   4   87.99    6.60
  -8   4   4   86.49    6.50
  -7  -4   4    8.80    2.80
   7  -4  -4    6.80    2.40
   7  -4  -4   11.70    3.30
  -7   4   4    7.20    2.10
  -7   4   4    4.90    1.90
  -7   4   4    8.10    2.20
   6  -4  -4   46.60    4.90
   6  -4  -4   58.79    6.50
   6  -4  -4   30.80    4.00
  -6   4   4   41.80    4.60
  -6   4   4   51.69    5.80
   6   4  -4   48.40    5.60
   5  -4  -4  313.27   11.90
   5  -4  -4  316.27   11.90
  -5  -4   4  297.37   12.30
   5  -4  -4  309.27   12.70
   5   4  -4  290.67   13.40
  -5   4   4  313.37   12.30
  -5   4   4  308.87   11.60
  -5   4   4  310.07   11.50
  -4  -4   4    4.60    1.70
   4  -4  -4    7.10    2.10
   4  -4  -4    6.70    1.80
   4  -4  -4    6.90    1.90
  -4  -4   4    6.20    0.40
  -4   4   4    8.80    2.30
   4   4  -4   11.00    2.50
  -4   4   4    6.30    1.80
  -4   4   4    5.50    1.60
  -3  -4   4  651.03   20.10
   3  -4  -4  703.23   20.20
   3  -4  -4  696.23   21.40
   3  -4  -4  691.23   20.00
  -3   4   4  701.53   20.10
  -3   4   4  679.33   20.90
  -3   4   4  664.93   19.80
   3   4  -4  708.73   20.60
   2   4  -4 1186.38   31.70
  -2   4   4 1225.38   31.70
  -1  -4   4  489.25   14.00
   1  -4  -4  505.85   15.20
  -1  -4   4  509.15   14.70
   1  -4  -4  536.05   15.70
   1   4  -4  518.05   16.20
  -1   4   4  519.95   15.50
  -1   4   4  503.25   16.60
   1   4  -4  493.95   14.80
   1   4  -4  524.85   14.20
  -1   4   4  515.85   15.30
   0  -4   4   27.20    2.10
   0  -4   4   27.00    3.50
   0  -4   4   25.20    2.20
   0  -4  -4   27.10    2.30
   0  -4  -4   21.10    2.70
   0   4  -4   29.20    2.30
   0   4   4   32.60    4.20
   0   4  -4   33.00    3.90
   0   4  -4   29.20    2.20
   0   4   4   28.40    3.00
   0   4   4   33.30    3.50
   1  -4   4  343.07   11.10
   1  -4   4  337.97   12.30
   1  -4   4  355.56   10.00
  -1  -4  -4  342.37   10.60
  -1  -4  -4  337.97   11.70
  -1   4  -4  340.37   10.00
  -1   4  -4  341.97   12.10
  -1   4  -4  353.66   11.20
   1   4   4  349.27   11.80
   1   4   4  335.47   10.60
   2  -4   4  469.45   15.80
   2  -4   4  488.75   14.70
  -2  -4  -4  472.65   15.10
  -2  -4  -4  484.05   13.50
   2  -4   4  486.55   13.00
   2   4   4  489.05   15.40
  -2   4  -4  465.35   12.90
  -2   4  -4  457.45   15.40
  -2   4  -4  485.95   14.70
   2   4   4  453.05   13.40
   3  -4   4  803.12   22.40
   3  -4   4  737.43   23.40
   3  -4   4  790.32   20.30
   3   4   4  791.02   20.30
  -3   4  -4  821.12   20.30
  -3   4  -4  758.52   23.20
   3   4   4  766.32   23.00
  -3   4  -4  796.12   22.50
   4  -4   4   41.70    2.80
  -4  -4  -4   31.00    3.90
   4  -4   4   48.10    4.30
   4  -4   4   41.00    4.30
   4   4   4   37.30    2.30
   4   4   4   39.20    4.50
   4   4   4   40.90    2.40
  -4   4  -4   43.90    5.10
  -4   4  -4   34.50    2.40
  -4   4  -4   39.30    4.10
   5  -4   4 1209.38   34.80
   5  -4   4 1180.08   33.00
  -5  -4  -4 1222.48   34.30
  -5   4  -4 1170.88   34.10
  -5   4  -4 1201.88   30.90
   5   4   4 1252.87   34.40
   6  -4   4 1056.99   30.40
   6  -4   4 1050.89   32.20
  -6  -4  -4 1093.59   31.90
   6   4   4 1045.30   26.60
  -6   4  -4 1055.99   31.70
  -6   4  -4 1071.29   30.60
  -6   4  -4 1110.39   28.90
  -6   4  -4 1056.69   28.30
   7  -4   4   27.40    4.20
  -7  -4  -4   45.40    5.70
   7   4   4   43.80    2.50
  -7   4  -4   49.20    3.90
  -7   4  -4   39.80    3.40
  -7   4  -4   51.09    5.30
  -7   4  -4   48.90    6.20
  -8  -4  -4  305.77   14.30
   8  -4   4  302.17   14.60
  -8   4  -4  320.27   13.30
  -8   4  -4  338.37   12.60
   8   4   4  336.67    9.70
   8   4   4  324.77    9.60
  -8   4  -4  311.37   11.90
  -9  -4  -4    4.90    2.50
   9  -4   4    5.00    2.30
  -9   4  -4    7.70    2.30
  -9   4  -4    8.30    2.80
  -9   4  -4    7.30    2.10
   9   4   4    6.00    1.20
   9   4   4    7.80    1.30
 -10  -4  -4   17.80    4.10
  10  -4   4   19.90    4.60
 -10  -4  -4   18.40    2.00
 -10   4  -4   23.90    3.90
 -10   4  -4   14.30    3.50
  10   4   4   18.80    2.00
  11  -4   4  176.48   12.00
 -11  -4  -4  156.28   10.80
  11   4   4  164.28    6.40
 -11   4  -4  171.38   10.00
 -11   4  -4  156.78    9.50
 -12  -4  -4   10.30    3.60
  12  -4   4    8.80    3.60
 -12   4  -4    9.00    2.90
 -12   4  -4    5.20    2.60
  12   4   4   11.60    1.50
 -13  -4  -4  197.38   13.20
 -13   4  -4  198.18   11.40
 -13   4  -4  169.28   10.90
 -14  -4  -4   58.69    8.70
 -14   4  -4   55.79    7.40
 -14   4  -4   63.89    8.90
 -15  -4  -4    3.20    3.70
 -15   4  -4    7.50    2.90
 -15   4  -4   10.10    3.50
 -15  -5   4   12.70    4.80
 -15   5   4    9.50    3.30
 -15   5   4   11.80    4.30
 -14  -5   4   14.60    4.70
 -14   5   4   12.40    3.60
 -14   5   4   17.30    4.80
 -13  -5   4   16.50    5.20
 -13   5   4   23.60    4.80
 -13   5   4   28.70    6.00
  12  -5  -4   83.69   10.50
 -12  -5   4   83.59    9.90
 -12   5   4   68.39    8.20
 -12   5   4   78.89    8.90
 -11  -5   4  134.59   10.60
  11  -5  -4  139.69   10.70
 -11   5   4  135.29    9.00
 -11   5   4  151.08   10.00
 -10  -5   4   71.39    8.50
  10  -5  -4   80.59    9.70
 -10   5   4   81.29    8.60
 -10   5   4   70.19    7.50
 -10   5   4   49.00    7.30
  -9  -5   4   18.40    4.50
   9  -5  -4   33.50    6.00
  -9   5   4   13.10    3.40
  -9   5   4   25.40    4.20
   8  -5  -4   -0.10    1.40
   8  -5  -4    0.00    1.00
  -8  -5   4   -0.40    1.50
  -8   5   4    0.30    1.50
  -8   5   4    2.90    1.70
   7  -5  -4  235.98   12.00
   7  -5  -4  200.18   10.20
  -7  -5   4  233.28   11.60
  -7   5   4  202.08   10.70
  -7   5   4  208.08   10.00
  -7   5   4  216.58   10.30
   6  -5  -4    1.10    1.20
   6  -5  -4    1.80    1.50
  -6  -5   4   -0.80    1.10
  -6   5   4    1.00    1.40
  -6   5   4    2.50    1.90
  -6   5   4   -0.20    0.90
   5  -5  -4    7.20    2.10
   5  -5  -4    5.80    1.80
  -5  -5   4    8.20    2.40
   5  -5  -4    5.30    2.00
  -5   5   4    8.70    2.30
  -5   5   4    5.20    1.90
   5   5  -4    8.60    2.50
   4  -5  -4   49.50    4.20
  -4  -5   4   56.89    2.30
   4  -5  -4   62.69    4.60
  -4  -5   4   50.09    4.40
   4  -5  -4   63.59    5.30
  -4   5   4   55.69    4.80
  -4   5   4   58.49    4.30
  -4   5   4   58.89    4.60
   4   5  -4   58.99    2.30
   3  -5  -4  721.73   21.50
  -3  -5   4  722.53   21.70
   3  -5  -4  708.43   23.30
  -3  -5   4  702.63   18.50
   3   5  -4  733.63   18.60
  -3   5   4  754.22   23.10
   3   5  -4  723.43   23.00
  -3   5   4  746.33   21.70
   3   5  -4  686.03   21.70
  -3   5   4  746.33   21.40
  -2  -5   4  110.29    5.70
  -2  -5   4  107.89    4.60
   2  -5  -4  114.39    5.90
   2  -5  -4   95.59    5.60
   2  -5  -4  108.99    7.00
   2   5  -4  115.09    6.00
  -2   5   4  113.09    5.90
   2   5  -4  120.19    4.80
  -2   5   4  112.49    5.90
  -2   5   4  102.29    6.50
   2   5  -4  112.29    6.60
  -1  -5   4   68.49    3.70
   1  -5  -4   71.29    4.40
   1  -5  -4   66.19    4.40
   1  -5  -4  104.59    8.30
  -1  -5   4   64.89    4.00
   1   5  -4   68.39    3.70
   1   5  -4   55.19    3.80
   1   5  -4   65.99    4.90
  -1   5   4   60.49    4.10
  -1   5   4   63.99    4.30
   0  -5   4    3.50    1.20
   0  -5   4    4.10    1.30
   0  -5  -4    2.80    1.30
   0  -5  -4    3.50    1.20
   0  -5   4    1.80    1.10
   0   5   4    4.90    1.80
   0   5  -4    2.90    1.10
   0   5   4    4.70    1.50
   0   5  -4    3.20    1.50
   0   5   4    4.40    1.40
   0   5  -4    3.30    1.20
   1  -5   4  208.48    7.20
  -1  -5  -4  194.88    8.50
   1  -5   4  190.28    9.30
  -1  -5  -4  206.78    7.70
   1  -5   4  189.58    7.80
  -1   5  -4  205.28    7.30
   1   5   4  206.98    8.80
  -1   5  -4  202.48    9.20
   1   5   4  203.48    7.70
  -1   5  -4  196.48    8.00
   2  -5   4  266.97   11.50
   2  -5   4  264.87    8.60
  -2  -5  -4  265.77    9.00
   2  -5   4  260.57    9.90
  -2  -5  -4  257.47   10.50
   2   5   4  271.77   10.80
  -2   5  -4  260.47   11.10
  -2   5  -4  258.77   10.00
   2   5   4  278.27    9.20
  -2   5  -4  268.37    8.70
   3  -5   4  261.57   11.60
   3  -5   4  261.97    8.70
  -3  -5  -4  275.27   11.10
   3   5   4  262.97   11.10
   3   5   4  273.77    8.90
  -3   5  -4  264.87   11.40
   3   5   4  272.77    8.70
  -3   5  -4  265.47   10.50
  -3   5  -4  256.07    8.60
  -4  -5  -4  271.57   11.40
   4  -5   4  256.07   10.60
   4  -5   4  261.87    9.00
   4  -5   4  247.68   11.70
  -4   5  -4  270.67   10.90
   4   5   4  268.07    8.50
   4   5   4  261.97    8.30
  -4   5  -4  260.47    8.80
   4   5   4  245.98   11.10
  -4   5  -4  257.87   11.50
  -5  -5  -4  428.86   16.30
   5  -5   4  414.86   16.90
   5  -5   4  454.55   13.80
  -5   5  -4  448.86   16.70
   5   5   4  420.06   12.40
   5   5   4  444.16   12.30
  -5   5  -4  450.95   15.70
  -5   5  -4  448.76   13.50
  -6  -5  -4   95.09    6.90
   6  -5   4  101.19    7.50
   6   5   4   93.89    3.90
  -6   5  -4   89.99    4.90
   6   5   4   85.19    5.00
  -6   5  -4   98.59    5.30
  -6   5  -4   95.69    6.30
  -6   5  -4   96.69    6.90
  -7  -5  -4    6.20    2.50
   7   5   4    4.90    1.00
  -7   5  -4    6.60    1.90
  -7   5  -4    2.00    1.60
  -7   5  -4    3.80    1.40
  -7   5  -4    4.70    2.00
   7   5   4    7.80    1.20
  -8  -5  -4   19.40    4.20
   8  -5   4   23.40    4.60
  -8   5  -4   26.60    3.70
  -8   5  -4   20.60    4.60
  -8   5  -4   16.10    3.50
   8   5   4   22.30    1.50
  -8   5  -4   25.10    3.60
  -9  -5  -4    5.60    2.80
   9  -5   4    2.80    1.90
  -9   5  -4    5.50    1.80
  -9   5  -4    7.20    2.20
  -9   5  -4    6.20    2.50
   9   5   4    6.70    0.90
   9   5   4    5.00    0.80
 -10  -5  -4   96.89    8.40
  10  -5   4  145.99   12.50
 -10   5  -4   98.89    6.90
 -10   5  -4  115.69    8.10
 -11  -5  -4   91.89   10.00
 -11   5  -4   83.89    8.80
 -11   5  -4   81.09    6.50
 -12  -5  -4  150.18   11.20
 -12   5  -4  121.09    9.00
 -12   5  -4  127.59    8.90
 -13  -5  -4   -0.70    1.80
 -13   5  -4   -0.90    1.40
 -13   5  -4    1.40    2.00
 -14  -5  -4    0.10    2.20
 -14   5  -4    0.40    1.50
 -14   5  -4    3.80    2.40
 -14   6   4   37.40    6.20
 -14   6   4   31.00    6.20
 -13  -6   4   19.40    5.40
 -13   6   4   21.00    4.70
 -13   6   4   26.40    5.50
 -12  -6   4   -0.70    1.90
 -12   6   4   -0.30    1.30
 -12   6   4    0.10    1.70
 -11  -6   4  117.39    9.90
  11  -6  -4  117.09   10.10
 -11   6   4   99.49    8.10
 -11   6   4  102.69    8.50
 -10  -6   4   40.70    7.20
  10  -6  -4   34.90    6.70
 -10   6   4   32.40    5.60
 -10   6   4   21.00    4.10
 -10   6   4   23.50    4.50
  -9  -6   4  192.48   11.70
   9  -6  -4  187.98   12.10
   9  -6  -4  176.48   10.40
  -9   6   4  171.58   10.90
  -9   6   4  209.28   11.10
  -9   6   4  183.88   10.50
   8  -6  -4   31.40    5.40
   8  -6  -4   36.50    5.40
  -8  -6   4   34.80    5.70
  -8   6   4   24.50    4.60
  -8   6   4   26.50    4.50
   7  -6  -4   90.09    6.50
  -7  -6   4   86.09    8.80
   7  -6  -4   79.49    8.90
  -7   6   4   74.29    6.60
  -7   6   4   77.39    6.30
   6  -6  -4  196.98    9.70
  -6  -6   4  188.78   10.30
   6  -6  -4  201.38   11.40
  -6   6   4  198.88   10.70
  -6   6   4  195.48    9.80
  -6   6   4  180.98    9.20
   5  -6  -4  679.13   24.00
  -5  -6   4  662.13   22.50
   5  -6  -4  682.73   21.60
  -5   6   4  670.43   21.90
  -5   6   4  698.83   23.40
  -5   6   4  650.83   21.10
   4  -6  -4   12.30    3.50
  -4  -6   4    8.40    2.50
   4  -6  -4    7.90    2.30
  -4  -6   4    8.00    1.30
   4   6  -4    5.60    2.20
  -4   6   4   10.00    2.30
   4   6  -4    8.00    1.30
  -4   6   4    6.70    2.20
   4   6  -4   10.60    2.70
  -4   6   4    6.00    2.30
  -3  -6   4  857.71   21.80
   3  -6  -4  840.22   27.30
  -3  -6   4  820.62   24.70
   3  -6  -4  819.32   24.50
   3  -6  -4  771.22   24.50
   3   6  -4  845.62   21.70
   3   6  -4  855.31   26.70
  -3   6   4  803.62   25.90
  -3   6   4  831.32   26.60
  -2  -6   4  339.77   12.20
   2  -6  -4  327.47   12.40
  -2  -6   4  305.07   10.40
   2  -6  -4  333.27   12.40
   2  -6  -4  324.87   14.40
   2   6  -4  328.97   10.60
  -2   6   4  320.67   13.40
  -2   6   4  332.77   12.40
  -2   6   4  343.17   14.10
   2   6  -4  343.07   13.80
   2   6  -4  326.27   12.30
   1  -6  -4  885.01   26.80
  -1  -6   4  925.61   25.00
  -1  -6   4  880.91   24.10
   1  -6  -4  857.21   25.60
  -1   6   4  899.51   25.40
   1   6  -4  848.02   25.00
   1   6  -4  885.01   27.30
   1   6  -4  887.01   24.20
  -1   6   4  906.11   27.50
   0  -6   4   -0.20    0.60
   0  -6   4   -0.50    0.50
   0  -6   4   -0.20    0.70
   0  -6  -4    1.30    0.90
   0  -6  -4   -2.00    0.60
   0   6  -4    2.00    1.30
   0   6   4    1.80    1.30
   0   6  -4   -0.20    0.70
   0   6   4   -0.40    0.80
   0   6  -4    1.40    1.10
  -1  -6  -4  239.28   10.10
   1  -6   4  240.88    8.60
  -1  -6  -4  231.78    8.90
   1  -6   4  258.97   11.70
   1  -6   4  217.38    9.10
   1   6   4  227.88    8.90
  -1   6  -4  235.08    9.40
   1   6   4  215.88    9.90
  -1   6  -4  222.78   10.70
  -1   6  -4  229.58    8.70
  -2  -6  -4   66.89    4.00
   2  -6   4   57.59    4.40
  -2  -6  -4   75.09    5.30
   2  -6   4   63.49    3.80
   2  -6   4   77.09    6.10
  -2   6  -4   69.49    4.90
   2   6   4   73.19    4.30
  -2   6  -4   67.19    4.00
   2   6   4   56.19    4.80
  -2   6  -4   65.79    5.50
  -3  -6  -4  975.70   26.70
   3  -6   4  985.30   31.20
   3  -6   4  985.10   28.90
   3  -6   4 1032.60   26.90
  -3  -6  -4 1023.60   30.10
  -3   6  -4 1003.40   26.80
   3   6   4 1041.90   26.90
   3   6   4 1016.70   26.70
  -3   6  -4 1048.70   30.90
   3   6   4 1007.40   30.10
   4  -6   4  157.28    6.70
   4  -6   4  145.09    9.20
  -4  -6  -4  164.08    9.00
  -4   6  -4  163.78    9.30
   4   6   4  150.28    6.20
  -4   6  -4  154.48    6.50
  -4   6  -4  137.99    7.90
   4   6   4  154.18    6.10
   5  -6   4  706.03   20.30
  -5  -6  -4  715.93   23.70
   5  -6   4  700.33   24.80
  -5   6  -4  686.43   20.00
   5   6   4  709.83   18.80
  -5   6  -4  727.03   24.30
   5   6   4  683.33   18.90
  -5   6  -4  716.23   22.80
  -6  -6  -4  227.18   11.90
   6  -6   4  222.38   12.40
   6  -6   4  241.88    9.60
   6   6   4  231.18    7.50
   6   6   4  245.38    7.80
  -6   6  -4  242.98   12.20
  -6   6  -4  242.18   11.30
  -6   6  -4  242.78    9.20
  -7  -6  -4  319.47   14.60
   7  -6   4  278.17   14.60
   7   6   4  287.47    8.50
   7   6   4  294.17    8.40
  -7   6  -4  283.47   10.80
  -7   6  -4  302.17   11.40
  -7   6  -4  298.67   14.30
  -7   6  -4  299.67   13.30
  -8  -6  -4    0.30    1.60
   8  -6   4    4.20    2.30
  -8   6  -4    0.40    1.50
  -8   6  -4    2.00    1.90
   8   6   4    0.60    0.30
   8   6   4    1.60    0.40
  -8   6  -4    0.70    1.10
  -9  -6  -4   15.20    4.20
  -9   6  -4    9.80    2.40
  -9   6  -4    5.30    2.60
  -9   6  -4    6.50    2.40
  -9   6  -4    9.60    2.60
 -10  -6  -4   17.30    5.20
 -10   6  -4   15.90    4.00
 -10   6  -4   15.70    3.30
 -11  -6  -4  144.39   11.10
 -11   6  -4  153.78    9.10
 -11   6  -4  141.19    9.80
 -12  -6  -4    5.90    3.20
 -12   6  -4    4.50    2.20
 -12   6  -4    6.10    2.90
 -13  -6  -4    3.30    3.20
 -13   6  -4    5.10    2.70
 -13   6  -4    3.00    2.30
 -14  -6  -4   70.49   14.40
 -14   6  -4   53.49    7.90
 -14   6  -4   46.80    7.00
 -13  -7   4   37.60    7.40
 -13   7   4   50.99    7.40
 -13   7   4   33.90    6.10
 -12  -7   4  130.19   13.50
 -12   7   4  106.39    9.00
 -12   7   4  124.79    9.70
 -11  -7   4    0.40    1.90
 -11   7   4    3.30    2.40
 -11   7   4    1.50    1.90
 -11   7   4   -1.40    1.10
  10  -7  -4   -0.70    1.20
 -10  -7   4    0.70    2.50
 -10   7   4   -2.20    1.50
 -10   7   4    1.20    1.80
 -10   7   4    2.60    2.20
   9  -7  -4   31.80    6.50
   9  -7  -4   27.00    4.80
  -9  -7   4   29.70    6.10
  -9   7   4   25.30    4.60
  -9   7   4   24.20    4.70
  -8  -7   4  203.78   12.20
   8  -7  -4  205.28   13.00
   8  -7  -4  202.28   11.00
  -8   7   4  212.38   12.20
  -8   7   4  210.18   11.40
   7  -7  -4   20.80    4.40
   7  -7  -4   16.00    3.60
  -7  -7   4   16.70    4.00
  -7   7   4   25.90    5.30
  -7   7   4   25.90    4.60
   6  -7  -4  233.38   11.20
   6  -7  -4  242.38   13.60
  -6  -7   4  233.38   12.00
  -6   7   4  238.78   11.70
  -6   7   4  247.88   12.90
  -5  -7   4  314.47   13.70
   5  -7  -4  325.97   15.60
   5  -7  -4  307.97   13.00
  -5  -7   4  298.97    8.50
  -5   7   4  297.77   14.30
  -5   7   4  334.87   13.70
   5   7  -4  295.17   14.70
   5   7  -4  310.67    8.60
  -4  -7   4  164.68    6.00
   4  -7  -4  166.58    8.70
  -4  -7   4  169.68    9.10
   4  -7  -4  182.28   11.00
  -4   7   4  165.18    8.60
   4   7  -4  160.78    6.00
  -4   7   4  151.88    8.70
  -4   7   4  184.98   10.40
   4   7  -4  161.68   10.00
  -3  -7   4  143.49    6.00
   3  -7  -4  140.29    9.50
  -3   7   4  146.59    8.00
   3   7  -4  153.58    6.20
   3   7  -4  123.09    8.60
  -3   7   4  140.29    7.70
  -3   7   4  142.39    9.10
   3   7  -4  143.89    8.20
  -2  -7   4    3.20    1.40
  -2  -7   4    8.20    2.30
   2  -7  -4    5.20    2.30
   2  -7  -4   10.30    3.30
   2   7  -4    5.40    1.60
  -2   7   4    9.50    2.60
  -2   7   4    8.50    2.40
  -2   7   4    5.50    2.30
   2   7  -4    4.60    1.70
   2   7  -4    4.90    2.50
   1  -7  -4  497.25   17.00
  -1  -7   4  500.85   15.90
   1  -7  -4  483.85   19.50
  -1  -7   4  514.65   16.70
  -1   7   4  525.55   18.80
   1   7  -4  489.55   16.90
   1   7  -4  511.65   19.10
  -1   7   4  542.05   19.90
   1   7  -4  518.15   16.10
  -1   7   4  514.05   17.70
   0  -7   4  284.47   10.60
   0  -7  -4  265.27   10.70
   0  -7  -4  268.17   12.80
   0   7   4  269.37   10.80
   0   7   4  254.07   12.90
   0   7  -4  286.17   10.80
   0   7  -4  276.57   12.80
   0   7  -4  272.97   10.80
   0   7   4  260.17   11.50
   1  -7   4   51.79    6.90
  -1  -7  -4   57.79    4.90
  -1  -7  -4   48.40    4.00
   1  -7   4   49.90    4.10
   1  -7   4   37.70    3.30
   1   7   4   42.20    5.90
  -1   7  -4   41.60    5.30
   1   7   4   47.90    3.90
  -1   7  -4   49.00    5.20
  -1   7  -4   41.50    3.60
   2  -7   4   29.40    3.50
  -2  -7  -4   25.50    3.30
   2  -7   4   33.70    5.50
  -2  -7  -4   31.60    4.80
  -2   7  -4   35.00    4.70
  -2   7  -4   25.40    3.30
  -2   7  -4   27.10    4.50
   2   7   4   26.10    3.30
   2   7   4   35.30    6.10
   3  -7   4  700.23   25.30
  -3  -7  -4  739.33   23.80
  -3  -7  -4  713.83   20.60
   3  -7   4  729.03   20.80
  -3   7  -4  691.93   24.50
  -3   7  -4  725.73   20.80
   3   7   4  741.43   20.70
  -3   7  -4  722.03   23.00
   3   7   4  695.63   25.90
  -4  -7  -4    8.70    2.90
   4  -7   4    5.40    2.30
   4  -7   4   11.40    2.20
  -4   7  -4    8.40    2.90
  -4   7  -4    5.30    2.30
   4   7   4    6.80    1.60
  -4   7  -4    7.70    1.80
   4   7   4    6.00    1.60
   5  -7   4  320.97   11.50
  -5  -7  -4  322.47   14.40
   5  -7   4  283.87   16.50
  -5   7  -4  306.97   11.20
   5   7   4  313.67   10.10
  -5   7  -4  299.17   14.40
  -5   7  -4  329.97   13.80
   5   7   4  322.37   10.30
   6  -7   4    5.10    1.70
  -6  -7  -4    4.40    2.20
   6   7   4    4.50    1.20
  -6   7  -4    7.10    1.80
   6   7   4    8.00    1.40
  -6   7  -4    4.90    2.60
  -6   7  -4    3.30    2.10
   7  -7   4  251.37   10.60
  -7  -7  -4  261.97   13.60
   7   7   4  248.38    7.70
   7   7   4  263.87    7.90
  -7   7  -4  246.18   10.10
  -7   7  -4  237.08   13.20
  -7   7  -4  270.27   12.90
  -7   7  -4  270.27   10.80
  -8  -7  -4   49.99    7.20
  -8   7  -4   45.20    4.80
  -8   7  -4   64.99    8.10
  -8   7  -4   57.89    4.80
  -8   7  -4   45.40    5.90
  -9  -7  -4   59.69   10.50
  -9   7  -4   58.89    4.80
  -9   7  -4   81.69    9.50
 -10  -7  -4   -2.30    1.30
 -10   7  -4    0.00    1.90
 -10   7  -4    2.50    1.60
 -11  -7  -4   77.69    9.40
 -11   7  -4   94.99   10.10
 -11   7  -4   87.69    6.70
 -12  -7  -4   84.29   10.70
 -12   7  -4   79.59    6.60
 -12   7  -4   74.69    8.70
 -13  -7  -4  112.19   12.50
 -13   7  -4  103.49    8.10
 -13   7  -4   88.29   10.00
 -13  -8   4   31.90    7.30
 -13   8   4   14.70    6.80
 -13   8   4   26.60    5.70
 -12  -8   4    3.90    3.00
 -12   8   4    0.30    1.60
 -12   8   4   -0.80    1.70
 -11  -8   4   65.19    9.00
 -11   8   4   76.99    9.80
 -11   8   4   95.99   10.20
 -11   8   4   70.59    9.10
 -10  -8   4    1.70    2.40
 -10   8   4    6.40    3.10
 -10   8   4    5.70    2.80
 -10   8   4    9.60    3.80
   9  -8  -4    3.30    2.20
  -9  -8   4    2.40    2.60
   9  -8  -4    5.00    2.40
  -9   8   4    2.60    2.20
  -9   8   4   -0.60    1.90
   8  -8  -4   25.50    5.80
   8  -8  -4   23.00    4.40
  -8  -8   4   20.60    4.80
  -8   8   4   21.60    6.10
  -8   8   4   22.80    5.40
  -7  -8   4    3.60    2.40
   7  -8  -4    2.70    2.00
   7  -8  -4    2.90    2.40
  -7   8   4    0.20    1.50
  -7   8   4    4.60    2.40
   7   8  -4   -1.60    1.00
   6  -8  -4  454.45   17.70
   6  -8  -4  467.05   21.20
  -6  -8   4  474.15   19.00
  -6   8   4  487.65   18.70
  -6   8   4  422.36   19.20
   6   8  -4  462.85   20.40
  -5  -8   4   14.90    3.50
   5  -8  -4   14.90    3.50
   5  -8  -4   13.40    3.80
   5   8  -4   17.20    1.90
  -5   8   4   12.60    3.10
   5   8  -4   14.90    4.00
  -5   8   4   22.20    4.90
   4  -8  -4   17.60    4.80
  -4  -8   4   13.50    2.00
   4  -8  -4   16.60    3.30
  -4  -8   4   10.50    3.00
  -4   8   4   17.30    4.30
   4   8  -4   14.90    4.10
   4   8  -4   16.40    2.20
  -4   8   4    8.80    2.80
   3  -8  -4  148.09   10.50
  -3  -8   4  119.29    7.60
  -3  -8   4  130.69    6.10
   3  -8  -4  139.09    8.20
  -3   8   4  137.19    8.20
  -3   8   4  134.49    9.50
   3   8  -4  131.29    6.20
   3   8  -4  143.69    9.60
  -2  -8   4  148.79    7.10
  -2  -8   4  159.98    8.40
   2  -8  -4  168.88    8.90
   2   8  -4  168.78   10.30
  -2   8   4  162.38    8.80
  -2   8   4  153.88   10.20
   2   8  -4  148.89    7.20
   1  -8  -4    1.30    1.60
  -1  -8   4    1.70    1.60
  -1  -8   4   -0.60    0.80
  -1   8   4    3.10    2.20
   1   8  -4    0.20    1.10
  -1   8   4    2.40    1.70
   1   8  -4   -0.80    0.90
   0  -8  -4    9.60    2.80
   0  -8   4    6.20    2.10
   0  -8   4   17.30    3.10
   0   8   4   11.20    3.70
   0   8  -4   14.50    2.90
   0   8   4    7.70    2.20
   0   8  -4   12.30    3.60
  -1  -8  -4   75.69    5.30
  -1  -8  -4   82.79    6.40
   1  -8   4   84.19    5.40
  -1   8  -4   92.19    7.40
   1   8   4   87.79    5.70
   1   8   4   71.99    7.80
  -1   8  -4   69.79    5.90
  -1   8  -4   87.59    6.00
  -2  -8  -4  538.45   19.60
  -2  -8  -4  535.45   17.40
   2  -8   4  563.74   17.50
  -2   8  -4  524.15   20.90
   2   8   4  528.35   21.90
   2   8   4  568.94   17.70
  -2   8  -4  535.95   17.60
  -2   8  -4  554.44   19.10
  -3  -8  -4   25.20    3.30
  -3  -8  -4   20.00    4.30
   3  -8   4   28.10    3.60
  -3   8  -4   25.30    4.20
  -3   8  -4   24.40    3.50
   3   8   4   26.50    3.50
   3   8   4   26.00    5.60
  -3   8  -4   18.20    3.90
   4  -8   4   57.09    4.40
  -4  -8  -4   58.39    6.80
   4   8   4   64.69    9.20
   4   8   4   58.39    3.90
  -4   8  -4   49.20    5.80
   4   8   4   60.79    4.10
  -4   8  -4   52.19    4.20
  -4   8  -4   75.89    8.70
  -5  -8  -4   14.40    3.80
   5  -8   4   11.90    2.60
  -5   8  -4    6.80    2.70
   5   8   4   11.30    2.00
  -5   8  -4   11.80    2.30
   5   8   4   12.20    2.00
  -5   8  -4   15.80    4.20
   5   8   4   13.50    5.80
  -6  -8  -4  134.89    9.50
   6  -8   4  137.49    7.20
   6   8   4  136.39    5.50
  -6   8  -4  133.09    9.90
   6   8   4  127.39    5.60
  -6   8  -4  140.49    9.10
   7  -8   4    3.90    1.80
  -7  -8  -4   -0.60    1.80
  -7   8  -4    5.40    2.50
   7   8   4    1.70    0.80
  -7   8  -4    1.60    1.20
  -8  -8  -4   12.90    4.30
  -8   8  -4   10.20    2.60
  -8   8  -4    5.80    2.00
  -8   8  -4    7.60    3.20
  -8   8  -4   10.80    3.60
  -9  -8  -4   44.10    7.20
  -9   8  -4   39.50    6.10
  -9   8  -4   38.10    6.30
  -9   8  -4   49.30    5.60
 -10  -8  -4    4.50    3.10
 -10   8  -4    1.90    2.30
 -10   8  -4    4.50    2.10
 -10   8  -4    8.00    3.40
 -11  -8  -4   13.10    4.50
 -11   8  -4   15.80    3.40
 -11   8  -4   18.10    4.50
 -12  -8  -4   26.70    6.30
 -12   8  -4   30.70    4.90
 -12   8  -4   35.90    6.60
 -12  -9   4    0.80    2.10
 -12   9   4    1.40    2.00
 -12   9   4    2.90    2.20
 -11  -9   4   25.90    6.00
 -11   9   4   23.80    5.40
 -11   9   4    9.80    3.70
 -11   9   4   13.30    4.20
  10  -9  -4  158.28   19.10
 -10  -9   4  105.79   11.40
 -10   9   4  109.19    9.20
  10   9  -4   92.09   11.00
 -10   9   4  114.69   12.90
 -10   9   4  113.49    9.10
  -9  -9   4    6.20    3.00
   9  -9  -4    3.00    2.40
  -9   9   4    7.70    3.20
  -9   9   4    4.40    3.10
   9   9  -4   12.20    4.50
   8  -9  -4    3.90    2.10
   8  -9  -4    4.90    3.40
  -8  -9   4    2.50    2.40
   8   9  -4    1.80    2.30
  -8   9   4    0.60    1.90
  -8   9   4    2.10    2.30
   7  -9  -4  135.79   11.50
   7  -9  -4  139.59    9.20
  -7  -9   4  141.19   10.10
  -7   9   4  128.19    9.20
  -7   9   4  134.99   10.40
   7   9  -4   79.29    9.50
   6  -9  -4   -0.80    1.20
  -6  -9   4    2.60    2.30
   6  -9  -4    2.00    2.30
   6   9  -4    2.80    2.40
  -6   9   4    0.90    2.00
  -6   9   4    2.30    2.20
  -5  -9   4   12.30    1.90
   5  -9  -4   19.60    4.90
  -5  -9   4   18.30    4.20
   5  -9  -4   17.30    3.90
   5   9  -4   11.80    3.80
   5   9  -4   15.00    2.00
  -5   9   4   13.00    3.60
  -5   9   4   11.60    3.50
  -4  -9   4    1.50    1.10
   4  -9  -4    3.40    2.00
  -4  -9   4    4.10    2.40
   4  -9  -4    3.30    2.50
  -4   9   4    4.60    2.50
   4   9  -4    6.00    3.00
  -4   9   4   -0.20    1.30
   4   9  -4    2.60    1.20
   3  -9  -4   11.40    3.90
  -3  -9   4   14.50    3.40
  -3  -9   4   11.30    2.30
   3  -9  -4    6.30    2.60
   3   9  -4   12.00    3.90
   3   9  -4   11.10    2.30
  -3   9   4   16.40    4.50
  -3   9   4    9.90    2.80
  -2  -9   4  407.66   14.40
   2  -9  -4  421.96   16.60
  -2  -9   4  401.76   15.90
   2   9  -4  431.96   18.90
  -2   9   4  415.16   18.90
  -2   9   4  418.46   16.30
   2   9  -4  418.26   14.60
   1  -9  -4   -0.50    1.30
  -1  -9   4    0.80    1.20
  -1   9   4   -0.60    1.10
  -1   9   4    2.10    3.20
   1   9  -4    2.00    1.90
   1   9  -4   -1.10    0.90
   0  -9   4   27.30    4.00
   0  -9  -4   23.60    4.30
   0   9  -4   21.40    3.80
   0   9   4   19.20    3.50
   0   9   4   19.70    4.60
   0   9  -4   21.00    5.00
  -1  -9  -4  137.09    8.80
  -1   9  -4  138.49    8.30
   1   9   4  146.29   10.60
  -1   9  -4  155.28    8.30
   1   9   4  150.68    8.10
  -1   9  -4  152.58   10.30
   2  -9   4   50.59    5.30
  -2  -9  -4   50.59    6.60
   2   9   4   48.50    7.90
  -2   9  -4   50.39    5.50
   2   9   4   52.79    4.60
  -2   9  -4   46.60    6.90
  -2   9  -4   52.39    5.90
  -3  -9  -4   18.40    4.10
  -3  -9  -4    8.70    2.10
   3  -9   4   10.70    2.50
  -3   9  -4   10.70    3.20
   3   9   4   12.50    2.60
  -3   9  -4    9.90    2.40
   3   9   4    7.00    4.20
  -3   9  -4   10.40    3.50
   4  -9   4    0.40    1.00
  -4  -9  -4    1.80    1.80
   4   9   4    2.10    1.20
   4   9   4    1.00    1.10
   4   9   4    1.60    2.40
  -4   9  -4    5.40    2.40
  -4   9  -4    1.50    1.30
  -4   9  -4   -0.30    1.80
   5  -9   4  267.27   11.00
  -5  -9  -4  264.47   13.80
  -5   9  -4  285.17   13.60
  -5   9  -4  249.48   14.40
  -5   9  -4  241.48   10.60
   5   9   4  267.57   15.90
   5   9   4  262.57    9.80
   5   9   4  260.77    9.60
   6  -9   4   15.50    3.20
  -6  -9  -4   13.10    4.20
  -6   9  -4   13.80    2.80
   6   9   4   14.50    4.30
   6   9   4   17.30    2.40
  -6   9  -4    9.10    3.60
   6   9   4   15.50    2.20
  -6   9  -4   18.00    4.70
  -7  -9  -4    1.90    1.90
   7  -9   4    4.70    2.10
  -7   9  -4    2.00    1.40
   7   9   4    2.20    1.00
  -7   9  -4    6.20    2.80
   7   9   4    3.70    0.90
  -7   9  -4    4.70    2.90
   7   9   4    1.20    2.50
  -8  -9  -4   10.90    4.00
  -8   9  -4    4.70    2.10
  -8   9  -4    5.70    2.90
  -8   9  -4   17.40    4.40
  -9  -9  -4   -2.20    1.40
  -9   9  -4   -0.30    1.20
  -9   9  -4    3.70    1.80
  -9   9  -4    1.80    2.00
 -10  -9  -4    9.20    3.90
 -10   9  -4    4.50    2.60
 -10   9  -4   13.30    3.20
 -10   9  -4    8.80    3.30
 -11  -9  -4   19.50    5.70
 -11   9  -4   17.00    4.40
 -11   9  -4   13.00    3.10
 -11   9  -4   18.20    5.40
 -11 -10   4   51.79    8.50
  11  10  -4   44.00    8.60
 -11  10   4   49.99    7.40
 -11  10   4   40.70    7.10
 -10 -10   4   87.19   10.50
  10 -10  -4   95.99   10.10
 -10  10   4   74.99    9.60
  10  10  -4   61.49    9.10
  -9 -10   4   14.10    4.50
   9 -10  -4   13.40    4.70
  -9  10   4   10.80    3.70
   9  10  -4    4.00    2.80
  -9  10   4    8.20    3.40
   8 -10  -4   41.10    6.10
  -8 -10   4   44.90    7.30
  -8  10   4   24.50    5.50
   8  10  -4   40.70    8.30
  -8  10   4   41.80    6.80
  -7 -10   4   31.40    5.80
   7 -10  -4   34.30    5.50
  -7  10   4   23.30    5.20
  -7  10   4   31.20    5.80
   7  10  -4   15.70    6.00
   6 -10  -4  106.29    8.00
  -6  10   4   74.09    8.90
  -6  10   4  101.69    8.40
   6  10  -4  111.09   12.00
   5 -10  -4   16.40    4.10
  -5 -10   4   17.20    2.30
  -5 -10   4   26.20    5.30
  -5  10   4   16.20    4.90
   5  10  -4   28.90    5.90
  -5  10   4   20.40    4.40
   5  10  -4   26.20    2.80
  -4 -10   4  333.17   15.50
   4 -10  -4  355.56   15.60
  -4 -10   4  343.77   12.10
   4  10  -4  352.16   18.10
  -4  10   4  337.97   18.00
  -4  10   4  374.26   16.30
   4  10  -4  363.46   12.30
   3 -10  -4   27.60    4.90
  -3 -10   4   28.30    3.70
  -3 -10   4   29.00    4.80
  -3  10   4   31.50    5.10
   3  10  -4   28.20    3.70
   3  10  -4   35.80    6.80
  -3  10   4   27.30    5.70
   2 -10  -4   42.30    6.20
  -2 -10   4   40.50    5.40
   2  10  -4   37.60    4.60
  -2  10   4   42.40    5.70
  -2  10   4   44.20    8.00
   2  10  -4   40.40    6.90
  -1 -10   4   74.49    6.10
   1 -10  -4   76.89    8.10
  -1  10   4   75.39    6.40
   1  10  -4   76.79    9.80
   1  10  -4   67.09    5.60
  -1  10   4   90.29   10.70
   0 -10   4   19.20    3.70
   0 -10  -4   17.40    4.00
   0  10  -4   11.70    3.20
   0  10   4   15.70    3.40
   0  10  -4   20.90    5.10
  -1 -10  -4    6.60    2.70
   1 -10   4    4.10    1.90
   1  10   4    3.40    1.90
  -1  10  -4    2.60    2.20
   1  10   4    4.80    3.20
  -1  10  -4    2.80    2.30
  -2 -10  -4  167.18   10.40
   2 -10   4  186.98    9.30
  -2  10  -4  155.58    9.60
   2  10   4  176.28   12.50
   2  10   4  168.68    8.90
  -2  10  -4  178.58   11.90
  -3 -10  -4   93.89    7.80
   3 -10   4   82.39    6.00
   3  10   4   78.89    5.70
   3  10   4   71.39    9.00
  -3  10  -4   90.29    7.30
  -3  10  -4   78.19    9.10
  -4 -10  -4  445.36   19.30
   4 -10   4  451.35   16.30
   4  10   4  476.65   22.40
   4  10   4  434.86   15.00
  -4  10  -4  432.46   20.40
  -4  10  -4  435.16   18.40
  -5 -10  -4   25.30    5.20
   5 -10   4   26.80    4.10
  -5  10  -4   25.00    5.70
   5  10   4   24.20    3.30
   5  10   4   23.50    3.20
   5  10   4   27.20    6.30
  -5  10  -4   26.20    5.10
   6 -10   4    6.40    2.10
  -6 -10  -4    6.20    3.20
   6  10   4    4.80    1.30
   6  10   4    7.50    1.80
  -6  10  -4    7.10    3.50
   6  10   4   -0.40    1.70
  -6  10  -4    9.70    3.30
   7 -10   4   26.20    4.20
  -7 -10  -4   19.90    4.90
   7  10   4   23.90    1.90
  -7  10  -4   24.10    5.10
  -7  10  -4   15.10    4.10
   7  10   4   22.90    2.40
   7  10   4   18.20    5.70
  -8 -10  -4   -0.20    2.10
  -8  10  -4    8.70    3.70
   8  10   4    1.00    2.40
  -8  10  -4    2.00    2.50
  -8  10  -4    7.10    2.40
  -9 -10  -4   54.09    8.10
  -9  10  -4   46.10    5.60
   9  10   4   49.30    9.30
  -9  10  -4   44.80    7.40
  -9  10  -4   49.70    7.60
 -10 -10  -4   82.19   12.50
 -10  10  -4   74.79   13.20
 -10  10  -4   90.49    6.60
 -10  10  -4   82.29   11.10
  -9 -11   4   46.20    8.00
   9 -11  -4   59.09    7.80
  -9  11   4   38.80    7.40
  -9  11   4   43.00    8.00
   9  11  -4   30.60    7.20
  -8 -11   4    5.00    3.00
   8 -11  -4    2.90    2.20
  -8  11   4    5.60    3.20
   8  11  -4    2.00    2.50
  -8  11   4    1.20    2.10
  -7 -11   4   91.79   10.80
   7 -11  -4   94.59   14.30
   7  11  -4   88.59   11.00
  -7  11   4   95.69   10.20
  -7  11   4   84.89   10.90
   6 -11  -4   11.80    3.60
  -6 -11   4    6.80    2.90
   6  11  -4   11.60    4.10
  -6  11   4   12.80    3.70
  -6  11   4   27.90    6.80
   5 -11  -4    6.40    3.00
  -5 -11   4   11.30    3.50
  -5  11   4    2.10    2.20
   5  11  -4   11.40    2.00
  -5  11   4    6.10    3.20
   4 -11  -4   15.10    3.90
  -4 -11   4   10.40    3.30
  -4  11   4   19.30    5.60
  -4  11   4   13.50    4.30
   4  11  -4   13.40    2.70
   4  11  -4    9.40    3.70
  -3 -11   4  135.69    9.20
   3 -11  -4  121.59    8.90
  -3  11   4  130.69    9.30
   3  11  -4  129.59    7.30
  -3  11   4  134.39   11.10
   3  11  -4  125.79   10.70
  -2 -11   4   47.00    6.40
   2 -11  -4   40.40    5.90
   2  11  -4   47.10    5.50
  -2  11   4   39.10    7.00
   2  11  -4   43.80    7.30
  -2  11   4   50.89    6.70
  -1 -11   4  149.88    9.10
   1 -11  -4  143.89    9.70
  -1  11   4  165.68    9.90
   1  11  -4  135.09   11.00
   1  11  -4  151.48    8.80
  -1  11   4  131.09   11.20
   0 -11  -4   22.50    4.80
   0 -11   4   18.50    3.80
   0  11   4   28.00    6.50
   0  11   4   13.40    3.30
   0  11  -4   24.50    4.30
   0  11  -4   18.00    5.00
   1 -11   4   65.79    6.90
  -1 -11  -4   74.79    8.40
  -1  11  -4   71.29    9.50
   1  11   4   70.59    9.90
  -1  11  -4   78.89    8.20
   1  11   4   89.99    6.80
  -2 -11  -4    2.40    2.50
   2 -11   4    1.00    1.60
   2  11   4    3.50    2.90
   2  11   4    1.00    1.50
  -2  11  -4   -1.10    1.40
  -2  11  -4    3.50    2.30
  -3 -11  -4   43.60    6.40
   3 -11   4   56.59    6.10
   3  11   4   67.59   10.40
  -3  11  -4   47.00    7.00
   3  11   4   45.30    5.30
  -3  11  -4   55.99    8.80
  -4 -11  -4   21.50    4.90
   4 -11   4   13.00    3.00
  -4  11  -4   16.60    4.30
   4  11   4   24.00    3.80
  -4  11  -4    9.10    4.00
   4  11   4    9.60    4.10
  -5 -11  -4   49.90    7.40
   5 -11   4   34.00    4.80
  -5  11  -4   36.50    6.40
  -5  11  -4   42.50    8.20
   5  11   4   46.60    8.30
  -6 -11  -4    0.20    1.80
   6 -11   4    2.50    1.70
   6  11   4    1.60    1.00
   6  11   4    0.90    2.20
  -6  11  -4    0.80    2.00
  -6  11  -4   -0.50    1.30
  -7 -11  -4   38.90    7.10
   7 -11   4   38.40    5.20
  -7  11  -4   48.30    8.70
  -7  11  -4   35.10    6.20
  -8 -11  -4   15.00    4.90
  -8  11  -4   21.30    5.30
  -8  11  -4   28.50    4.40
  -8  11  -4   17.60    5.00
   8  11   4   18.70    6.00
  -9 -11  -4   27.80    6.30
  -9  11  -4   22.90    5.40
   9  11   4   18.80    5.40
  -9  11  -4   30.60    4.60
  -9  11  -4   22.90    5.80
  -7 -12   4   -1.50    1.50
   7 -12  -4    0.60    1.90
   7  12  -4   -0.80    1.80
  -7  12   4    0.80    2.00
   6 -12  -4    1.00    2.20
  -6 -12   4    0.80    2.20
  -6  12   4    2.40    2.30
   6  12  -4   -0.50    2.10
  -6  12   4   -0.90    1.30
   5 -12  -4    3.80    2.40
  -5 -12   4    4.40    2.80
  -5  12   4    2.40    2.40
  -5  12   4    3.90    2.50
   5  12  -4    2.00    2.60
   5  12  -4    2.60    1.30
   4 -12  -4    7.60    3.00
  -4 -12   4    5.30    2.80
  -4  12   4    1.60    2.40
   4  12  -4    3.20    1.60
  -4  12   4    4.20    3.00
   4  12  -4    5.70    3.20
   3 -12  -4    3.80    2.20
  -3 -12   4    0.40    1.90
  -3  12   4    2.30    2.90
   3  12  -4    2.90    1.90
  -3  12   4   -0.10    1.80
   3  12  -4   -0.30    1.70
   2 -12  -4   18.80    4.40
  -2 -12   4   23.00    5.20
   2  12  -4   22.40    4.10
  -2  12   4   20.00    4.60
  -2  12   4   20.70    5.40
  -1 -12   4    1.10    1.70
   1 -12  -4    0.60    1.60
   1  12  -4    0.40    1.40
  -1  12   4    0.10    1.70
   1  12  -4    0.70    1.90
  -1  12   4    3.00    2.20
   0 -12   4    8.80    2.80
   0 -12  -4   12.80    3.70
   0  12  -4   10.30    3.10
   0  12   4    4.40    3.10
   0  12   4   12.00    3.40
   0  12  -4    9.70    4.50
  -1 -12  -4   -2.50    0.80
   1 -12   4    1.30    1.60
   1  12   4   -1.80    1.00
   1  12   4   -0.10    2.10
  -1  12  -4    0.90    1.90
  -1  12  -4   -0.90    2.80
  -2 -12  -4    2.00    2.30
   2 -12   4    0.90    1.40
  -2  12  -4   -1.50    1.70
  -2  12  -4   -1.20    1.40
   2  12   4    1.70    2.70
   2  12   4   -0.60    1.10
  -3 -12  -4   29.50    5.70
   3 -12   4   31.00    4.80
  -3  12  -4   31.60    7.20
   3  12   4   37.00    8.30
  -3  12  -4   32.50    5.90
   3  12   4   38.80    5.30
   4 -12   4    5.80    2.30
  -4 -12  -4    2.10    2.40
   4  12   4    3.20    3.30
   4  12   4    3.60    1.80
  -4  12  -4    5.60    3.50
  -4  12  -4    1.70    2.20
   5 -12   4    6.00    2.40
  -5 -12  -4    4.50    2.90
  -5  12  -4    2.10    3.20
   5  12   4    6.80    2.00
  -5  12  -4    4.60    2.50
   6 -12   4   35.60    5.20
  -6 -12  -4   29.00    6.00
  -6  12  -4   43.30    8.70
   6  12   4   27.20    7.00
  -6  12  -4   38.40    6.80
   7 -12   4    4.60    2.10
   7  12   4    1.80    2.30
  -4 -13   4    2.30    2.50
   4 -13  -4    1.80    1.90
  -4  13   4   -2.10    1.40
   4  13  -4    1.40    1.70
   4  13  -4    0.40    2.40
  -4  13   4    0.60    1.80
  -3 -13   4   38.70    6.60
   3 -13  -4   31.70    5.70
  -3  13   4   25.10    5.20
   3  13  -4   31.00    4.40
   3  13  -4   31.20    6.60
  -3  13   4   37.70    7.90
   2 -13  -4   23.80    5.30
  -2 -13   4   16.50    3.90
  -2  13   4   11.60    4.60
  -2  13   4   14.30    4.10
   2  13  -4   18.90    5.10
   2  13  -4   13.90    3.50
  -1 -13   4   -0.70    1.10
   1 -13  -4   -0.20    1.70
  -1  13   4   -0.90    1.60
   1  13  -4    2.40    2.60
  -1  13   4    1.30    2.00
   0 -13   4   19.40    4.20
   0 -13  -4   22.50    5.10
   0  13   4   23.10    4.80
   0  13  -4   22.10    6.20
   0  13  -4   24.30    4.90
   0  13   4   30.80    7.10
   1 -13   4    3.20    2.30
  -1 -13  -4    3.50    2.60
   1  13   4    0.10    1.40
  -1  13  -4   -1.20    1.50
  -1  13  -4    1.60    1.80
   1  13   4    1.20    2.10
  -2 -13  -4   51.69    7.60
   2 -13   4   39.00    5.60
   2  13   4   43.80    6.90
  -2  13  -4   50.49    8.90
   2  13   4   41.40   10.70
  -2  13  -4   51.69    7.50
   3 -13   4    6.50    2.50
  -3 -13  -4    5.20    3.10
  -3  13  -4    9.10    4.40
   3  13   4    6.40    2.40
  -3  13  -4    5.40    2.90
   3  13   4    6.50    3.60
  -4 -13  -4   13.00    4.00
   4 -13   4   24.00    4.30
  -4  13  -4   18.50    4.70
   4  13   4   19.60    5.80
  -4  13  -4   11.70    4.70
   4  13   4   14.00    3.00
 -16   0   5    3.10    2.70
 -16   0   5   -0.70    0.90
 -15   0   5   -1.70    1.60
 -15   0   5    1.10    1.20
 -14   0   5    0.40    1.00
  14   0  -5   -0.10    1.30
 -14   0   5    2.40    2.50
 -13   0   5   28.10    5.90
 -13   0   5   35.40    4.30
 -12   0   5    1.30    2.20
  12   0  -5    2.60    1.50
  11   0  -5  281.57   11.10
 -11   0   5  290.57   14.90
 -11   0   5  279.97   10.70
 -10   0   5   -0.50    0.70
  10   0  -5    2.40    1.30
 -10   0   5    2.40    2.10
  -9   0   5    9.60    2.90
   9   0  -5   10.80    2.90
   9   0  -5   13.40    2.30
  -9   0   5   14.70    2.30
   8   0  -5    0.00    0.60
   8   0  -5    0.20    0.70
  -8   0   5    0.00    0.70
  -8   0   5    1.50    1.30
  -7   0   5   23.80    3.70
  -7   0   5   18.50    3.40
   7   0  -5   22.90    2.70
  -7   0   5   23.20    2.60
   7   0  -5   22.60    3.50
  -6   0   5    1.50    0.80
  -6   0   5    1.00    1.20
   6   0  -5    0.80    0.80
   6   0  -5    0.20    0.70
  -6   0   5    2.10    1.30
   5   0  -5  336.47   10.30
  -5   0   5  346.87   12.20
  -5   0   5  343.17   12.30
  -5   0   5  342.87   10.20
   5   0  -5  355.36   11.10
  -4   0   5   -0.30    0.60
   4   0  -5    0.40    0.60
   4   0  -5    0.70    0.60
  -4   0   5    0.50    0.50
  -4   0   5    1.10    1.00
  -3   0   5 3594.74   87.39
  -3   0   5 3555.84   92.59
   3   0  -5 3503.65   87.19
  -3   0   5 3549.84   93.09
  -2   0   5    1.30    0.60
   2   0  -5    2.00    0.40
   2   0  -5    1.60    0.50
   2   0  -5    0.40    0.50
  -1   0   5  889.21   25.10
   1   0  -5  880.91   26.30
   1   0  -5  921.41   25.30
  -1   0   5  910.81   26.30
   0   0   5    1.30    0.40
   0   0   5    0.40    0.30
   0   0  -5    0.80    0.40
  -1   0  -5    2.30    0.50
   1   0   5    1.70    0.50
  -1   0  -5    3.10    0.70
   1   0   5    2.50    0.50
   2   0   5    0.30    0.40
  -2   0  -5    0.70    0.50
   2   0   5    0.00    0.30
  -2   0  -5    2.40    0.70
  -3   0  -5  819.72   26.00
   3   0   5  804.12   25.20
  -3   0  -5  771.72   25.10
   3   0   5  756.72   25.60
  -4   0  -5    0.30    0.70
   4   0   5    0.20    0.60
  -4   0  -5    0.30    0.80
   4   0   5    0.60    0.70
  -5   0  -5 2580.14   70.19
   5   0   5 2571.34   73.19
   5   0   5 2636.54   70.29
  -5   0  -5 2654.13   73.89
  -6   0  -5    1.20    0.80
  -6   0  -5    0.50    0.90
   6   0   5    1.60    0.90
   6   0   5    1.60    1.00
   7   0   5 1662.63   41.70
   7   0   5 1606.14   43.10
  -8   0  -5    1.70    1.10
   8   0   5    1.00    1.10
   8   0   5    0.00    0.70
   8   0   5   -0.60    0.70
  -8   0  -5   -0.40    0.90
  -9   0  -5   52.79    4.10
  -9   0  -5   58.69    6.50
   9   0   5   55.79    6.70
   9   0   5   62.49    4.40
  10   0   5    0.40    1.30
  10   0   5    0.20    0.90
 -10   0  -5    0.50    1.30
 -11   0  -5  132.79    7.30
  11   0   5  143.49    9.80
 -11   0  -5  132.39    9.00
  12   0   5    0.60    1.70
 -12   0  -5    2.20    2.30
 -12   0  -5    2.90    1.70
 -13   0  -5  225.18   13.00
 -13   0  -5  207.28   10.10
  13   0   5  205.48   13.30
 -14   0  -5    0.80    1.60
 -14   0  -5    0.00    1.10
 -15   0  -5   88.39   10.20
 -15   0  -5   86.49    6.50
 -16   1   5    1.00    2.40
 -16   1   5    1.00    1.50
 -15  -1   5   17.30    5.20
 -15   1   5   14.20    3.30
 -15   1   5   13.70    4.70
 -14  -1   5   21.00    3.10
 -14  -1   5   22.30    5.50
  14  -1  -5   13.90    4.70
 -14   1   5   21.90    3.90
 -14   1   5   16.30    4.80
  13  -1  -5   95.49    8.40
 -13  -1   5  116.59    9.90
 -13  -1   5   89.89    5.20
 -13   1   5   92.29   10.30
 -13   1   5  106.89    6.70
 -12  -1   5  287.07   15.50
 -12  -1   5  286.37   10.30
  12  -1  -5  258.67   13.80
 -12   1   5  286.37   11.70
  12   1  -5  287.47   10.60
 -12   1   5  325.47   16.00
 -11  -1   5  161.68    7.00
 -11  -1   5  204.08   12.00
  11   1  -5  170.08    7.30
 -11   1   5  159.78    8.10
 -11   1   5  172.18   10.90
 -10  -1   5  168.68    6.90
  10  -1  -5  164.88    8.20
 -10  -1   5  174.08   10.80
  10   1  -5  173.58    7.10
  10   1  -5  169.48    9.30
 -10   1   5  197.38   11.00
 -10   1   5  161.68    7.90
  -9  -1   5  528.75   15.30
  -9  -1   5  527.35   20.30
   9   1  -5  526.35   15.50
   9   1  -5  542.25   18.40
  -9   1   5  533.15   16.80
  -9   1   5  553.64   20.10
   8  -1  -5    3.70    1.60
  -8  -1   5    1.60    1.60
  -8  -1   5    3.10    1.00
  -8   1   5    1.90    1.60
   8   1  -5    2.10    0.80
  -8   1   5    1.20    1.10
  -8   1   5    3.60    1.70
   8   1  -5    1.70    1.10
   7  -1  -5   19.40    3.60
   7  -1  -5   19.50    2.80
  -7  -1   5   11.60    2.80
  -7  -1   5   17.50    2.00
  -7  -1   5   18.30    3.20
  -7   1   5   23.10    3.80
   7   1  -5   16.20    3.10
  -7   1   5   14.50    2.30
  -7   1   5   14.60    3.00
   7   1  -5   19.20    2.10
  -6  -1   5   50.09    4.40
   6  -1  -5   56.69    4.10
   6  -1  -5   50.49    3.40
  -6  -1   5   52.79    2.70
  -6   1   5   58.09    3.60
  -6   1   5   53.29    4.20
   6   1  -5   57.39    3.30
  -6   1   5   55.09    4.40
   6   1  -5   53.99    5.60
  -5  -1   5   99.29    5.70
   5  -1  -5   85.89    4.40
   5  -1  -5   94.89    4.90
  -5  -1   5   92.69    3.60
  -5   1   5   84.39    5.10
  -5   1   5   96.09    4.50
   5   1  -5   95.89    3.60
  -5   1   5   91.49    5.40
   5   1  -5   92.99    5.40
  -4  -1   5 1225.68   41.90
  -4  -1   5 1264.97   33.30
   4  -1  -5 1261.77   41.70
   4  -1  -5 1227.38   37.30
   4   1  -5 1240.18   33.10
  -4   1   5 1255.57   37.30
   4   1  -5 1218.08   41.40
  -4   1   5 1256.67   41.10
  -3  -1   5 1608.24   47.90
  -3  -1   5 1671.03   40.80
   3  -1  -5 1562.14   47.60
  -3  -1   5 1581.14   40.40
   3  -1  -5 1603.34   44.40
  -3   1   5 1620.74   44.50
  -3   1   5 1590.64   47.30
   3   1  -5 1520.25   47.10
  -2  -1   5 1265.07   36.50
  -2  -1   5 1206.98   31.60
   2  -1  -5 1270.07   36.90
   2  -1  -5 1185.08   36.50
   2   1  -5 1167.08   35.80
  -2   1   5 1222.38   36.60
  -2   1   5 1193.28   34.50
   2   1  -5 1202.58   31.50
  -1  -1   5 1243.58   33.50
  -1  -1   5 1203.98   33.20
  -1  -1   5 1195.88   31.80
   1  -1  -5 1174.78   33.50
   1  -1  -5 1191.08   34.70
  -1   1   5 1195.68   33.60
   1   1  -5 1217.48   31.80
  -1   1   5 1186.88   34.50
   0  -1   5   34.60    1.70
   0  -1   5   37.00    1.50
   0  -1  -5   35.10    2.00
   0  -1   5   35.30    1.90
   0  -1  -5   40.80    2.20
   0   1  -5   32.90    2.10
   0   1   5   37.00    2.00
   0   1   5   29.40    1.90
   0   1  -5   35.50    1.50
   0   1   5   35.10    2.00
   0   1  -5   33.30    1.70
  -1  -1  -5  176.08    5.70
   1  -1   5  175.58    4.40
   1  -1   5  175.48    5.80
   1  -1   5  177.78    5.80
  -1  -1  -5  181.38    5.90
  -1   1  -5  175.98    5.80
   1   1   5  169.58    5.60
  -1   1  -5  173.18    5.70
  -1   1  -5  177.18    4.40
   1   1   5  181.88    5.90
   2  -1   5    0.60    0.50
   2  -1   5    0.60    0.50
  -2  -1  -5    0.80    0.50
   2  -1   5    1.00    0.40
  -2  -1  -5    1.30    0.50
  -2   1  -5    0.80    0.40
  -2   1  -5    5.80    1.10
   2   1   5    0.80    0.60
   2   1   5    0.80    0.40
  -3  -1  -5    7.80    1.30
  -3  -1  -5    7.50    1.50
   3  -1   5    8.80    1.80
   3  -1   5    6.60    1.10
   3  -1   5    5.70    1.20
   3   1   5    5.20    1.20
  -3   1  -5    6.60    1.10
  -3   1  -5    6.60    1.20
  -4  -1  -5   10.20    1.90
   4  -1   5    9.50    1.70
   4  -1   5   10.20    2.10
  -4  -1  -5    6.80    1.30
  -4   1  -5   11.50    1.70
   4   1   5   11.20    2.00
   4   1   5   12.10    1.60
  -4   1  -5   10.60    1.80
   5  -1   5   12.90    2.00
  -5  -1  -5   14.90    2.60
   5  -1   5   19.60    2.70
  -5  -1  -5   14.80    2.00
   5  -1   5   21.80    3.30
  -5   1  -5   12.70    2.10
  -5   1  -5   18.20    2.60
   5   1   5   18.30    2.10
   5   1   5   14.60    2.40
  -6  -1  -5   41.40    4.40
  -6  -1  -5   38.00    2.80
   6  -1   5   38.80    3.20
   6  -1   5   39.70    3.20
   6  -1   5   38.70    4.40
   6   1   5   41.20    4.40
  -6   1  -5   35.30    3.10
  -6   1  -5   40.60    3.30
   6   1   5   38.50    2.70
  -7  -1  -5   33.20    2.80
  -7  -1  -5   37.60    4.80
   7  -1   5   35.00    3.90
   7  -1   5   36.60    4.20
   7  -1   5   43.00    5.40
  -7   1  -5   33.40    4.10
   7   1   5   35.60    2.80
  -7   1  -5   40.80    4.20
  -8  -1  -5  190.78   10.70
  -8  -1  -5  178.28    7.40
   8  -1   5  179.28    8.20
   8   1   5  160.38    8.80
   8   1   5  184.38    7.50
  -8   1  -5  196.98    9.10
  -8   1  -5  178.78    8.10
   9  -1   5   14.60    2.90
  -9  -1  -5   10.40    2.00
   9  -1   5   13.90    3.50
  -9  -1  -5   16.50    3.50
  -9   1  -5   14.80    3.10
  -9   1  -5   11.20    3.30
   9   1   5   13.00    2.30
  10  -1   5   40.20    6.20
 -10  -1  -5   42.40    5.80
 -10  -1  -5   40.90    3.50
 -10   1  -5   41.50    4.90
  10   1   5   40.10    4.70
 -10   1  -5   53.99    6.40
 -11  -1  -5    1.10    1.90
  11  -1   5    1.70    1.50
 -11  -1  -5    2.50    1.40
  11   1   5    2.90    2.00
 -11   1  -5    3.40    2.10
 -11   1  -5   -0.50    1.00
  11   1   5    1.50    1.10
 -12  -1  -5    6.20    2.00
  12  -1   5    9.90    3.80
 -12  -1  -5   11.00    3.90
 -12   1  -5   11.70    3.00
  12   1   5    4.50    2.80
 -12   1  -5    4.50    2.70
 -13  -1  -5   12.90    2.60
  13  -1   5    9.20    3.00
 -13  -1  -5   19.00    5.70
 -13   1  -5   10.90    3.00
 -13   1  -5   15.80    4.30
  13   1   5   19.20    4.90
 -14  -1  -5    6.90    3.50
 -14  -1  -5    5.40    1.90
 -14   1  -5    5.50    3.00
 -14   1  -5    9.50    2.70
 -15  -1  -5   13.40    4.20
 -15  -1  -5   15.10    3.20
 -15   1  -5   13.70    3.90
 -15   1  -5   14.10    4.40
 -16  -2   5    7.80    4.10
 -16   2   5   11.30    4.10
 -16   2   5    5.50    2.30
 -15  -2   5    2.30    2.50
 -15   2   5    5.70    3.40
 -15   2   5    4.90    2.20
 -14  -2   5    1.00    0.70
 -14  -2   5    4.90    3.30
 -14   2   5    0.20    1.30
  14   2  -5   -0.50    1.80
 -14   2   5   -0.20    1.80
  13  -2  -5  285.27   15.40
 -13  -2   5  272.97    9.10
 -13  -2   5  321.67   17.00
  13   2  -5  287.37    9.40
 -13   2   5  313.77   18.10
 -13   2   5  290.07   12.70
  13   2  -5  278.47   16.80
 -12  -2   5   36.30    2.60
 -12  -2   5   38.40    6.70
  12  -2  -5   28.80    5.40
 -12   2   5   43.20    6.90
 -12   2   5   43.50    5.30
  12   2  -5   33.60    2.60
  12   2  -5   44.00    6.20
 -11  -2   5   26.70    5.40
 -11  -2   5   27.20    2.20
  11  -2  -5   25.40    5.10
  11   2  -5   24.70    2.50
 -11   2   5   20.30    4.60
  11   2  -5   23.50    4.00
 -11   2   5   24.70    3.70
 -10  -2   5    6.10    2.90
  10  -2  -5    8.10    2.70
 -10  -2   5    6.40    1.30
 -10   2   5    5.90    2.00
 -10   2   5    5.60    2.60
  10   2  -5    5.80    1.30
  -9  -2   5   40.00    6.00
   9  -2  -5   28.80    4.20
  -9  -2   5   30.30    2.10
   9  -2  -5   33.10    4.20
  -9   2   5   35.20    5.20
   8  -2  -5  110.09    6.20
  -8  -2   5  123.19    8.10
  -8  -2   5  103.59    3.90
  -8   2   5  111.79    7.30
   8   2  -5  105.19    4.00
  -8   2   5  105.89    6.00
   7  -2  -5   41.60    4.40
  -7  -2   5   48.40    6.40
  -7   2   5   41.80    5.00
  -7   2   5   40.50    4.70
   7   2  -5   41.70    2.00
   7   2  -5   35.80    4.80
  -7   2   5   31.50    3.70
  -6  -2   5   56.09    6.00
  -6  -2   5   36.80    1.70
   6  -2  -5   34.40    3.60
   6  -2  -5   27.10    4.00
  -6  -2   5   36.40    1.70
  -6   2   5   36.50    3.10
  -6   2   5   23.90    3.20
  -6   2   5   35.40    4.20
  -6   2   5   45.50    5.10
  -5  -2   5 1908.71   45.10
  -5  -2   5 1856.71   45.00
   5  -2  -5 1857.71   54.79
  -5  -2   5 1844.52   59.99
   5  -2  -5 1837.62   58.39
  -5   2   5 1854.61   54.19
   5   2  -5 1675.43   58.49
  -5   2   5 1816.52   57.49
   4   2  -5 1271.97   33.70
   3  -2  -5  334.97   11.20
  -3  -2   5  332.17   11.30
   3  -2  -5  344.87   10.90
  -3  -2   5  348.67    8.80
  -3   2   5  361.06   11.00
   3   2  -5  345.67   11.30
  -3   2   5  357.16   11.00
  -3   2   5  347.77   11.20
   2  -2  -5  680.53   18.40
   1  -2  -5 1283.27   36.10
   1  -2  -5 1238.78   37.30
  -1  -2   5 1221.38   33.00
  -1   2   5 1188.38   35.60
  -1   2   5 1245.08   37.20
   1   2  -5 1199.98   34.70
   0  -2   5   86.49    3.60
   0  -2   5   93.69    3.10
   0  -2   5   93.39    3.90
   0  -2  -5   92.19    4.10
   0   2  -5   87.69    3.80
   0   2  -5   87.59    3.10
   0   2   5   92.79    3.90
   0   2  -5   98.79    3.80
   0   2   5   88.99    4.00
   1  -2   5  122.99    5.00
   1  -2   5  122.09    3.10
  -1  -2  -5  122.09    5.00
   1  -2   5  126.19    4.80
   1   2   5  116.09    4.40
  -1   2  -5  133.29    5.00
  -1   2  -5  122.59    5.00
   1   2   5  126.99    5.10
  -1   2  -5  114.29    3.10
   1   2   5  117.99    4.50
   2  -2   5   20.70    2.60
  -2  -2  -5   18.60    1.50
  -2  -2  -5   21.20    2.50
   2  -2   5   20.90    2.30
   2   2   5   20.40    1.60
  -2   2  -5   16.50    0.90
  -2   2  -5   19.40    0.90
  -2   2  -5   25.60    2.80
   2   2   5   21.70    2.50
  -2   2  -5   15.30    1.90
  -3  -2  -5 1198.68   33.90
   3  -2   5 1176.08   37.20
  -3  -2  -5 1165.48   38.90
  -3   2  -5 1205.98   32.10
  -3   2  -5 1217.48   37.50
   3   2   5 1170.98   39.00
  -3   2  -5 1170.38   32.20
   4  -2   5 1542.75   47.40
  -4  -2  -5 1534.05   49.99
  -4  -2  -5 1609.74   43.30
  -4   2  -5 1522.15   47.30
   4   2   5 1604.54   50.69
  -4   2  -5 1556.24   44.00
   4   2   5 1541.25   42.70
  -4   2  -5 1571.24   43.70
   5  -2   5  241.28   10.00
   5  -2   5  233.88    8.90
  -5  -2  -5  238.28    7.70
  -5  -2  -5  231.38    9.60
   5   2   5  224.58    7.50
  -5   2  -5  238.78    8.20
   5   2   5  222.08    9.50
  -5   2  -5  234.48    9.00
  -5   2  -5  225.88    8.10
  -6  -2  -5  600.14   19.30
  -6  -2  -5  601.34   16.60
   6  -2   5  560.24   18.00
  -6   2  -5  608.74   17.60
   6   2   5  569.54   19.20
  -6   2  -5  617.34   17.90
  -6   2  -5  619.74   18.50
   6   2   5  600.84   16.50
  -7  -2  -5  805.62   22.10
   7  -2   5  836.52   24.30
  -7  -2  -5  830.82   25.60
   7  -2   5  818.62   26.10
   7   2   5  838.42   22.10
  -7   2  -5  828.52   24.10
   7   2   5  780.12   25.20
  -7   2  -5  883.91   24.50
  -7   2  -5  825.02   23.70
  -8  -2  -5  146.59    8.60
   8  -2   5  153.88    7.80
  -8  -2  -5  155.98    6.50
  -8   2  -5  147.99    8.70
  -8   2  -5  160.98    8.00
   8   2   5  151.88    6.40
  -8   2  -5  158.68    7.80
   9  -2   5   90.29    7.30
  -9  -2  -5  103.79    7.40
  -9  -2  -5   87.99    4.80
   9   2   5  104.39    5.10
  -9   2  -5   92.39    6.20
  -9   2  -5   93.09    6.10
  -9   2  -5  100.39    6.60
 -10  -2  -5   38.10    3.80
  10  -2   5   26.00    4.30
 -10  -2  -5   35.80    5.60
  10   2   5   40.70    3.30
 -10   2  -5   33.80    4.50
 -10   2  -5   33.10    4.70
  11  -2   5   11.50    3.70
 -11  -2  -5   15.40    3.90
 -11  -2  -5   21.90    3.00
  11   2   5   27.80    3.40
 -11   2  -5   21.30    4.30
 -11   2  -5   27.00    4.40
  12  -2   5   33.60    7.00
 -12  -2  -5   28.20    5.60
 -12  -2  -5   23.90    3.30
 -12   2  -5   20.50    4.20
  12   2   5   26.60    3.60
 -12   2  -5   27.70    4.40
 -13  -2  -5   11.60    4.00
  13   2   5   10.90    2.30
 -13   2  -5   13.60    3.80
 -13   2  -5   15.80    3.60
 -14  -2  -5   39.00    4.40
 -14  -2  -5   40.00    6.80
 -14   2  -5   40.20    7.00
 -15  -2  -5   83.19    5.40
 -15  -2  -5   84.29   10.60
 -15   2  -5   93.39    7.50
 -15   2  -5   92.79   10.00
 -15  -3   5  104.89   12.80
 -15   3   5   88.59    7.20
 -15   3   5   96.29   11.40
 -14  -3   5  324.17   18.10
 -14   3   5  332.87   17.50
 -14   3   5  301.57   15.80
  13  -3  -5  209.98   13.30
 -13  -3   5  213.18   14.00
 -13   3   5  244.78   14.30
 -13   3   5  212.58   11.10
  13   3  -5  196.18   11.90
 -12  -3   5    9.90    3.70
  12  -3  -5   11.80    3.80
 -12   3   5   14.60    3.30
 -12   3   5   12.00    4.00
  11  -3  -5   68.69    8.00
 -11  -3   5   61.69    8.10
 -11   3   5   57.09    7.30
 -11   3   5   52.69    5.80
  10  -3  -5   29.00    5.10
 -10  -3   5   24.90    5.00
 -10   3   5   25.10    3.90
 -10   3   5   22.20    4.50
  -9  -3   5    4.00    2.40
   9  -3  -5    3.80    1.90
  -9   3   5    1.80    1.60
  -9   3   5    1.00    1.60
  -8  -3   5   83.39    6.80
   8  -3  -5   75.59    6.00
   8  -3  -5   72.19    8.40
  -8   3   5   74.79    5.30
  -8   3   5   68.39    5.80
  -8   3   5   69.29    5.50
  -7  -3   5  342.77   14.30
   7  -3  -5  349.77   13.70
   7  -3  -5  323.07   12.60
   7  -3  -5  347.47   13.70
  -7   3   5  347.47   13.80
  -7   3   5  338.97   12.60
  -7   3   5  338.67   13.30
  -7   3   5  326.07   13.00
   6  -3  -5 1509.45   40.00
  -6   3   5 1501.05   39.30
   6   3  -5 1351.36   39.70
   5  -3  -5  317.37   12.20
  -5  -3   5  344.17   12.70
   5  -3  -5  325.87   11.60
   5  -3  -5  330.47   12.10
  -5   3   5  313.27   11.80
  -5   3   5  332.47   11.60
  -5   3   5  325.57   11.70
   5   3  -5  295.17   12.10
   4  -3  -5  493.65   15.00
   4  -3  -5  480.15   15.20
  -4  -3   5  464.25   15.50
   4  -3  -5  479.45   15.60
  -4   3   5  456.85   14.90
  -4   3   5  482.95   15.30
   4   3  -5  442.66   15.20
  -4   3   5  483.65   14.80
   3  -3  -5    2.30    1.20
   3  -3  -5    1.30    1.00
   3  -3  -5    1.30    0.80
  -3  -3   5    3.00    0.60
  -3  -3   5    4.20    1.40
  -3   3   5    1.00    0.90
   3   3  -5    1.10    0.90
  -3   3   5    1.70    0.90
   3   3  -5    0.90    0.40
  -3   3   5   11.40    2.10
   2  -3  -5 2194.98   63.89
   2  -3  -5 2228.28   62.59
  -2  -3   5 2301.67   56.59
  -2  -3   5 2101.69   62.19
  -2   3   5 2274.27   62.89
  -2   3   5 2304.77   64.19
   2   3  -5 2318.87   63.49
   2   3  -5 2286.57   56.99
   1  -3  -5  130.59    5.50
  -1  -3   5  133.99    5.10
  -1  -3   5  132.79    5.90
   1  -3  -5  140.59    5.90
  -1  -3   5  131.59    4.70
   1  -3  -5  144.19    6.60
  -1   3   5  130.99    5.50
   1   3  -5  138.09    5.80
  -1   3   5  128.49    5.60
   1   3  -5  130.79    4.80
   1   3  -5  131.79    5.20
  -1   3   5  128.99    6.10
   0  -3   5   11.00    1.30
   0  -3  -5   11.10    1.80
   0  -3  -5    9.40    1.50
   0  -3   5    8.80    1.70
   0  -3   5   10.50    1.50
   0   3   5   10.70    2.20
   0   3  -5    9.00    1.60
   0   3   5   11.10    1.80
   0   3  -5    8.90    1.40
   0   3  -5   10.00    1.30
   0   3   5    9.90    1.60
  -1  -3  -5    7.50    1.50
  -1  -3  -5    8.10    1.40
   1  -3   5    8.40    1.40
   1  -3   5    7.20    1.60
   1  -3   5    8.80    1.00
  -1   3  -5    7.50    1.00
  -1   3  -5    8.80    1.50
   1   3   5    8.90    1.50
  -1   3  -5    5.60    1.30
   1   3   5    6.50    1.60
   2  -3   5  189.48    7.80
   2  -3   5  184.78    5.40
  -2  -3  -5  187.48    7.50
   2  -3   5  188.88    7.20
  -2   3  -5  185.88    7.20
   2   3   5  195.48    7.70
  -2   3  -5  183.38    5.30
   2   3   5  187.78    6.40
   2   3   5  190.28    6.40
  -2   3  -5  188.08    7.70
   3  -3   5   84.09    3.30
   3  -3   5   85.89    4.60
   3  -3   5   73.09    4.80
  -3  -3  -5   76.39    4.70
   3   3   5   84.09    3.60
   3   3   5   89.09    5.00
  -3   3  -5   88.49    4.70
  -3   3  -5   81.19    3.10
   3   3   5   84.09    3.70
  -3   3  -5   85.79    5.00
   4  -3   5  456.65   14.60
  -4  -3  -5  459.05   12.80
   4  -3   5  463.75   15.70
  -4  -3  -5  456.05   15.20
  -4   3  -5  454.95   12.80
   4   3   5  446.76   15.10
  -4   3  -5  457.75   14.60
   4   3   5  459.95   12.70
  -4   3  -5  463.75   15.40
  -4   3  -5  455.45   12.50
  -5  -3  -5  392.46   11.40
   5  -3   5  380.66   14.50
   5  -3   5  398.26   13.50
  -5  -3  -5  406.96   14.40
  -5   3  -5  393.16   11.80
  -5   3  -5  407.26   12.10
   5   3   5  391.86   11.30
  -5   3  -5  358.86   13.90
   5   3   5  412.46   14.40
  -5   3  -5  399.86   13.50
   6  -3   5 3539.15   99.09
  -6  -3  -5 3582.34  104.59
  -6  -3  -5 3659.83   90.39
   6   3   5 3345.67  103.49
  -6   3  -5 3557.24   95.29
  -6   3  -5 3532.75   94.59
  -6   3  -5 3635.44   99.59
   6   3   5 3613.34   89.89
   7  -3   5  190.48   10.10
  -7  -3  -5  171.18    9.30
  -7  -3  -5  176.68    6.60
   7  -3   5  186.08    8.80
  -7   3  -5  170.88    7.60
  -7   3  -5  176.88    8.60
   7   3   5  179.98    6.50
  -7   3  -5  187.18    8.10
   8  -3   5   10.70    3.30
  -8  -3  -5   16.00    3.60
  -8  -3  -5   11.60    1.90
   8   3   5   12.30    1.90
  -8   3  -5   10.50    2.50
  -8   3  -5   10.30    2.40
  -8   3  -5   11.90    2.40
  -9  -3  -5   40.30    3.00
   9  -3   5   53.39    7.30
  -9  -3  -5   40.70    5.70
  -9   3  -5   48.50    5.60
  -9   3  -5   44.10    5.10
   9   3   5   45.90    3.10
  -9   3  -5   47.60    5.20
 -10  -3  -5   69.99    4.10
 -10  -3  -5   89.59    9.50
  10   3   5   76.89    4.30
 -10   3  -5   72.99    6.00
 -10   3  -5   78.99    6.10
  11  -3   5   11.90    3.60
 -11  -3  -5   17.10    2.50
 -11  -3  -5    8.60    3.40
 -11   3  -5   16.60    3.80
  11   3   5   11.60    2.10
 -11   3  -5   12.30    3.20
 -12  -3  -5  106.29    5.30
  12  -3   5   80.49   10.00
 -12  -3  -5  155.58   19.10
  12   3   5  102.89    5.30
 -12   3  -5   85.69    7.00
 -12   3  -5   98.39    7.70
 -13  -3  -5   89.99   10.10
 -13  -3  -5  100.49    5.30
 -13   3  -5   99.79    8.10
  13   3   5  113.19    6.80
 -13   3  -5  109.69    9.20
 -14  -3  -5  348.77   18.00
 -14  -3  -5  300.97   10.70
 -14   3  -5  319.97   15.90
 -14   3  -5  302.87   14.70
 -15  -3  -5   68.09    9.50
 -15   3  -5   62.59    7.40
 -15   3  -5   66.79    8.30
 -15   4   5    1.80    1.80
 -15   4   5    1.50    2.40
 -14  -4   5    6.30    3.50
 -14   4   5   11.90    3.30
 -14   4   5   20.20    5.30
  13  -4  -5  269.07   17.60
 -13  -4   5  261.07   15.90
 -13   4   5  265.47   15.00
  12  -4  -5  303.47   23.50
 -12  -4   5  282.87   15.90
 -12   4   5  304.27   13.70
 -12   4   5  253.17   14.40
 -11  -4   5   66.39    8.70
  11  -4  -5   59.49    8.90
 -11   4   5   53.89    6.10
 -11   4   5   59.49    7.70
  10  -4  -5  284.67   14.60
 -10  -4   5  302.37   15.30
 -10   4   5  300.07   13.20
 -10   4   5  331.07   15.00
  -9  -4   5    8.50    3.40
   9  -4  -5   10.60    3.10
  -9   4   5    8.10    2.70
  -9   4   5    6.90    2.60
  -9   4   5    8.00    2.50
  -8  -4   5    2.50    1.90
   8  -4  -5   -0.90    0.80
   8  -4  -5    3.20    1.80
  -8   4   5    2.00    1.50
  -8   4   5    0.30    1.10
  -8   4   5    2.50    1.70
   7  -4  -5   17.20    3.40
  -7  -4   5   17.70    3.60
  -7   4   5   15.70    3.00
  -7   4   5   21.10    3.90
  -7   4   5   22.80    3.80
   6  -4  -5  149.88    8.40
   6  -4  -5  162.78    8.20
   6  -4  -5  155.48    7.90
   6   4  -5  151.98    8.40
  -6   4   5  153.38    7.80
  -6   4   5  132.09   10.10
  -6   4   5  136.19    7.80
   5   4  -5 2572.84   67.69
   4  -4  -5  309.77   11.60
   4  -4  -5  318.57   12.60
  -4  -4   5  318.77    7.90
  -4  -4   5  327.37   12.10
   4  -4  -5  295.47   11.40
  -4   4   5  324.97   11.60
   4   4  -5  317.37    7.80
  -4   4   5  318.27   12.20
  -4   4   5  317.27   11.50
   4   4  -5  306.27   11.90
   3  -4  -5 1523.45   49.30
  -3  -4   5 1630.84   51.19
  -3  -4   5 1500.65   40.10
   3  -4  -5 1558.84   50.59
  -3   4   5 1595.74   50.59
   3   4  -5 1531.85   40.10
  -3   4   5 1541.45   49.30
   3   4  -5 1559.54   51.09
   2  -4  -5  966.60   27.20
   2  -4  -5  925.21   25.50
   2   4  -5  906.51   25.30
  -2   4   5  922.21   25.50
   1  -4  -5  338.47   12.80
  -1  -4   5  347.47   10.70
  -1  -4   5  345.57   10.30
   1  -4  -5  343.07   11.60
   1  -4  -5  336.77   11.20
   1   4  -5  340.37   10.90
  -1   4   5  328.87   12.40
  -1   4   5  342.97   11.30
   1   4  -5  350.66   12.00
  -1   4   5  340.97   11.50
   1   4  -5  340.57   10.30
   0  -4  -5  191.88    7.30
   0  -4   5  185.28    6.40
   0  -4   5  196.18    7.00
   0  -4   5  182.18    8.10
   0  -4  -5  199.48    7.90
   0   4  -5  202.08    8.20
   0   4   5  184.18    7.70
   0   4   5  181.48    8.60
   0   4  -5  187.98    7.00
   0   4   5  185.48    7.30
  -1  -4  -5  255.57    8.90
   1  -4   5  271.87    9.40
   1  -4   5  276.97   10.60
  -1  -4  -5  262.77   10.00
   1  -4   5  277.87    8.10
  -1   4  -5  270.57   10.30
  -1   4  -5  282.57    9.60
  -1   4  -5  272.67    8.20
   1   4   5  277.57    9.20
   1   4   5  293.97   10.30
  -2  -4  -5  495.25   15.90
   2  -4   5  512.35   16.60
   2  -4   5  495.05   15.20
   2   4   5  504.15   14.20
  -2   4  -5  489.25   13.20
  -2   4  -5  498.35   16.20
   2   4   5  495.75   14.30
   2   4   5  487.65   15.90
  -2   4  -5  514.05   15.40
  -3  -4  -5 1890.21   61.39
   3  -4   5 1984.00   58.59
   3  -4   5 1893.71   51.19
  -3   4  -5 2079.99   59.49
   3   4   5 1907.01   52.49
   3   4   5 1869.21   61.59
   3   4   5 1926.91   52.89
  -3   4  -5 1938.41   51.09
   4  -4   5  630.54   16.90
   4  -4   5  626.54   20.40
  -4  -4  -5  622.34   19.80
  -4   4  -5  611.74   17.20
  -4   4  -5  637.24   20.10
   4   4   5  618.34   16.70
   4   4   5  589.34   16.70
  -4   4  -5  639.64   19.20
   5  -4   5 1729.93   45.00
   5   4   5 1686.73   45.80
  -6  -4  -5  142.69    8.30
   6  -4   5  130.59    8.30
   6   4   5  131.39    5.20
  -6   4  -5  138.89    8.10
  -6   4  -5  140.09    7.60
   6   4   5  138.19    5.30
  -6   4  -5  144.19    6.30
  -6   4  -5  141.59    6.10
   7  -4   5   86.39    6.90
  -7  -4  -5   96.29    7.00
  -7   4  -5   90.19    6.70
  -7   4  -5   86.69    4.90
   7   4   5   87.09    4.00
   7   4   5   86.69    3.90
  -7   4  -5   92.29    5.30
  -7   4  -5   90.99    6.20
  -8  -4  -5    5.00    2.70
  -8  -4  -5    5.50    1.20
  -8   4  -5    4.90    1.90
  -8   4  -5    8.00    2.00
   8   4   5    3.20    1.00
  -8   4  -5    4.90    2.00
   9  -4   5   -0.80    0.70
  -9  -4  -5    2.60    0.90
  -9  -4  -5    4.40    2.50
  -9   4  -5    4.90    1.90
  -9   4  -5    0.40    1.40
  -9   4  -5    1.90    1.20
   9   4   5    0.40    0.60
 -10  -4  -5  158.38    6.10
  10  -4   5  167.98   11.30
 -10  -4  -5  155.78   10.50
 -10   4  -5  161.08    9.50
 -10   4  -5  160.58    8.90
  10   4   5  161.48    6.10
 -11  -4  -5    7.20    3.10
 -11  -4  -5    7.90    1.50
  11  -4   5    1.50    1.60
  11   4   5    7.10    1.40
 -11   4  -5    3.20    2.00
 -11   4  -5    7.00    2.50
 -12  -4  -5   45.10    2.90
 -12  -4  -5   48.50    7.50
  12   4   5   54.39    3.10
 -12   4  -5   56.09    6.60
 -12   4  -5   45.40    6.70
 -13  -4  -5  168.58   12.20
  13   4   5  166.98    5.80
 -13   4  -5  149.49   10.00
 -13   4  -5  174.28   10.60
 -14  -4  -5    2.40    2.80
 -14   4  -5    0.50    1.60
 -14   4  -5    1.50    2.00
 -15  -4  -5   14.30    5.50
 -15   4  -5    9.10    3.40
 -15   4  -5    2.30    2.20
 -15  -5   5   -0.10    2.40
 -15   5   5    2.10    2.20
 -15   5   5    2.40    2.60
 -14  -5   5  159.78   12.70
 -14   5   5  135.19   10.90
 -14   5   5  148.29   10.10
 -13  -5   5    2.40    2.40
 -13   5   5   -0.90    1.70
 -13   5   5   -0.20    1.20
  12  -5  -5   21.90    5.60
 -12  -5   5   21.40    5.20
 -12   5   5   29.00    5.10
 -12   5   5   18.30    4.60
 -11  -5   5   13.40    4.20
  11  -5  -5   24.00    5.30
 -11   5   5   17.20    4.20
 -11   5   5   22.90    4.30
 -10  -5   5   26.90    5.20
  10  -5  -5   33.10    5.60
 -10   5   5   37.90    5.60
 -10   5   5   44.30    6.50
 -10   5   5   29.70    5.10
  -9  -5   5  366.96   16.90
   9  -5  -5  357.46   16.80
  -9   5   5  396.26   15.60
  -9   5   5  360.06   16.00
  -9   5   5  381.96   16.20
  -8  -5   5   40.80    5.80
   8  -5  -5   57.99    7.10
   8  -5  -5   35.20    5.20
  -8   5   5   41.90    5.70
  -8   5   5   40.20    5.10
   7  -5  -5   22.30    3.90
  -7  -5   5   20.30    4.20
   7  -5  -5   28.10    4.90
  -7   5   5   26.60    4.50
  -7   5   5   17.30    3.20
   6  -5  -5  982.40   32.40
  -6  -5   5  927.31   29.00
   6  -5  -5  942.61   28.30
  -6   5   5  908.41   28.80
  -6   5   5  928.21   27.50
  -6   5   5  926.11   27.80
   5  -5  -5    6.90    2.70
   5  -5  -5    2.50    1.50
   5  -5  -5    1.50    1.30
  -5  -5   5    2.20    1.70
   5   5  -5    1.60    1.20
  -5   5   5    3.10    1.80
  -5   5   5    1.90    1.30
  -5   5   5    4.80    1.80
   4  -5  -5    6.50    1.90
  -4  -5   5    7.10    1.00
   4  -5  -5    7.80    2.50
   4  -5  -5    6.50    2.00
  -4  -5   5    6.60    2.10
   4   5  -5    7.80    2.40
  -4   5   5    5.20    1.70
  -4   5   5   10.60    2.90
   4   5  -5    7.00    0.90
  -4   5   5    6.10    1.90
   3  -5  -5   15.20    3.50
  -3  -5   5   12.40    2.40
  -3  -5   5   13.50    1.70
   3  -5  -5   11.10    2.40
   3  -5  -5   13.40    2.60
   3   5  -5   11.20    2.40
  -3   5   5   12.40    2.40
  -3   5   5   10.70    2.20
   3   5  -5   14.20    1.70
  -3   5   5   15.20    2.90
   3   5  -5   10.80    2.80
  -2  -5   5    1.30    1.10
   2  -5  -5    2.80    1.20
   2  -5  -5    4.10    1.90
  -2  -5   5    1.50    0.80
   2  -5  -5    0.90    1.00
  -2   5   5    0.50    0.80
  -2   5   5    3.60    1.40
  -2   5   5   -0.50    0.60
   2   5  -5    1.90    1.20
   2   5  -5    1.40    1.10
   2   5  -5    1.40    0.70
  -1  -5   5  422.96   13.20
   1  -5  -5  428.36   14.30
  -1  -5   5  437.76   12.80
   1  -5  -5  405.56   13.70
   1   5  -5  425.96   15.00
   1   5  -5  428.56   12.80
  -1   5   5  421.86   13.90
   1   5  -5  412.46   13.40
  -1   5   5  423.16   14.20
  -1   5   5  433.46   15.70
   0  -5  -5  822.22   22.60
   0  -5  -5  816.02   23.50
   0  -5   5  800.82   22.10
   0  -5   5  795.72   21.60
   0  -5   5  828.32   24.80
   0   5   5  783.62   22.50
   0   5   5  806.02   23.50
   0   5  -5  816.72   21.90
   0   5  -5  801.32   24.20
  -1  -5  -5  390.86   13.60
   1  -5   5  392.16   11.60
  -1  -5  -5  397.26   12.50
   1  -5   5  390.96   12.80
   1  -5   5  380.46   14.40
   1   5   5  392.06   13.80
  -1   5  -5  387.06   11.70
   1   5   5  396.26   15.30
   1   5   5  379.56   12.50
  -1   5  -5  395.86   12.90
  -1   5  -5  402.16   14.30
  -2  -5  -5  233.68    9.80
   2  -5   5  212.48    8.90
   2  -5   5  236.78    7.50
  -2  -5  -5  212.28    8.00
  -2   5  -5  237.78    7.70
  -2   5  -5  234.28    9.20
   2   5   5  219.68    8.20
  -2   5  -5  233.48   10.20
   2   5   5  208.18    9.50
   3  -5   5   60.09    3.20
  -3  -5  -5   56.79    4.60
   3  -5   5   57.29    4.90
   3  -5   5   64.19    4.50
   3   5   5   64.09    3.60
   3   5   5   61.29    3.40
   3   5   5   58.49    4.80
  -3   5  -5   52.59    4.20
  -3   5  -5   51.39    3.00
  -4  -5  -5  114.19    7.00
   4  -5   5  111.29    7.30
   4  -5   5  114.09    6.50
   4  -5   5  105.29    4.80
  -4   5  -5  102.99    4.60
   4   5   5  113.89    4.90
  -4   5  -5  105.39    6.90
   4   5   5  108.79    4.70
   4   5   5  102.59    6.60
  -4   5  -5  113.09    6.50
  -5  -5  -5   59.69    5.30
   5  -5   5   65.29    3.90
   5  -5   5   62.59    7.60
  -5   5  -5   57.69    4.90
  -5   5  -5   70.39    5.80
   5   5   5   66.79    3.50
  -5   5  -5   64.19    3.70
   5   5   5   69.59    3.50
   6  -5   5  207.98   12.20
  -6  -5  -5  220.18   10.90
  -6   5  -5  214.78    8.30
  -6   5  -5  192.58   10.40
  -6   5  -5  217.28   10.10
   6   5   5  215.58    7.20
   6   5   5  203.38    6.90
  -6   5  -5  204.88    7.90
  -7  -5  -5    1.90    1.90
   7  -5   5    0.90    1.30
  -7   5  -5    3.30    2.10
  -7   5  -5    4.40    2.10
   7   5   5    2.80    0.90
  -7   5  -5    2.70    1.20
  -7   5  -5    2.40    1.20
   7   5   5    5.20    1.10
   8  -5   5   90.19    9.90
  -8  -5  -5   93.29    7.40
  -8   5  -5   84.49    6.50
   8   5   5   77.99    3.60
  -8   5  -5   77.39    5.00
   8   5   5   77.69    3.50
  -8   5  -5   86.39    5.50
  -8   5  -5   78.09    6.90
  -9  -5  -5   43.70    6.50
   9  -5   5   36.70    6.40
  -9   5  -5   54.89    6.80
  -9   5  -5   49.10    5.30
   9   5   5   45.50    2.50
  -9   5  -5   46.50    4.00
 -10  -5  -5    5.30    3.00
 -10   5  -5    2.60    1.60
 -10   5  -5    3.80    2.20
  10   5   5    2.70    0.70
 -11  -5  -5    1.00    2.10
 -11   5  -5    2.20    2.20
 -11   5  -5    2.60    1.70
 -12  -5  -5    5.20    3.00
 -12   5  -5    1.90    2.00
 -12   5  -5    3.10    2.50
 -13  -5  -5   15.60    4.90
 -13   5  -5   19.80    4.20
 -13   5  -5   16.90    4.00
 -14  -5  -5   95.69   11.40
 -14   5  -5  103.19    8.60
 -14   5  -5   67.09    7.90
 -14   6   5   82.59    8.90
 -14   6   5   81.19   10.00
 -13  -6   5   70.19    9.60
 -13   6   5   65.79    8.00
 -13   6   5   71.89    8.90
 -12  -6   5   94.59   11.10
 -12   6   5   85.49    9.00
  11  -6  -5   37.40    6.60
 -11  -6   5   42.70    7.40
 -11   6   5   67.09    8.10
 -11   6   5   53.79    7.30
 -10  -6   5    0.40    2.00
  10  -6  -5    4.50    2.60
 -10   6   5    3.30    2.30
 -10   6   5    1.60    1.60
 -10   6   5    7.10    2.70
   9  -6  -5   38.90    5.80
   9  -6  -5   40.90    6.70
  -9  -6   5   45.20    6.80
  -9   6   5   35.60    5.90
  -9   6   5   30.90    5.00
   8  -6  -5   -1.00    0.80
   8  -6  -5    2.10    2.10
  -8  -6   5    2.30    2.00
  -8   6   5   -1.20    1.30
  -8   6   5   -0.60    0.90
  -7  -6   5   37.60    5.70
   7  -6  -5   38.50    6.20
   7  -6  -5   45.00    5.90
  -7   6   5   41.10    7.10
  -7   6   5   36.80    5.10
   6  -6  -5  277.97   13.80
   6  -6  -5  270.77   12.10
  -6  -6   5  275.17   12.90
  -6   6   5  284.97   15.00
  -6   6   5  286.47   12.40
   5  -6  -5  603.44   22.00
  -5  -6   5  608.24   20.60
  -5   6   5  568.74   19.20
  -5   6   5  550.74   19.50
  -5   6   5  615.84   23.50
   4  -6  -5 1391.46   40.60
   4  -6  -5 1344.17   37.60
  -4  -6   5 1350.36   38.00
   4   6  -5 1370.96   39.60
  -4   6   5 1422.56   39.90
  -4   6   5 1381.96   37.60
   4   6  -5 1321.97   38.40
   3  -6  -5  198.18    9.30
  -3  -6   5  223.58    9.60
  -3  -6   5  208.48    7.20
   3  -6  -5  202.88   10.90
   3  -6  -5  189.38    9.20
   3   6  -5  202.78    7.10
  -3   6   5  193.38   10.00
  -3   6   5  208.38   10.60
  -3   6   5  204.58    9.30
   3   6  -5  211.48   10.40
  -2  -6   5  187.98    7.10
   2  -6  -5  201.68    9.00
  -2  -6   5  196.58    8.40
   2  -6  -5  180.08   10.20
   2  -6  -5  182.68    8.60
   2   6  -5  193.18    7.20
   2   6  -5  190.18    9.70
  -2   6   5  196.48   10.10
   2   6  -5  178.38    8.50
  -2   6   5  184.18    8.60
  -2   6   5  179.18    8.60
  -1  -6   5   69.39    4.20
  -1  -6   5   75.89    4.60
   1  -6  -5   71.69    5.10
   1  -6  -5   66.19    5.30
   1   6  -5   62.89    4.10
   1   6  -5   90.89    6.20
  -1   6   5   73.79    6.00
  -1   6   5   59.39    4.70
  -1   6   5   60.39    4.50
   1   6  -5   64.49    4.50
   0  -6   5    1.10    1.00
   0  -6  -5    1.80    1.20
   0  -6  -5    1.30    1.20
   0  -6   5    1.60    1.00
   0  -6   5    4.20    1.90
   0   6  -5    1.50    1.00
   0   6   5    1.00    1.40
   0   6  -5    3.90    1.70
   0   6   5    2.20    1.50
   0   6   5    0.90    1.20
   0   6  -5    1.70    1.20
  -1  -6  -5    7.80    2.30
   1  -6   5    2.90    1.40
  -1  -6  -5    4.50    1.50
   1  -6   5    3.10    1.20
   1  -6   5    4.90    1.90
  -1   6  -5    3.90    1.90
   1   6   5    2.40    1.50
   1   6   5    4.00    1.50
   1   6   5    2.60    1.40
  -1   6  -5    3.50    1.60
  -1   6  -5    4.10    1.40
   2  -6   5   30.70    4.30
  -2  -6  -5   26.00    3.00
   2  -6   5   38.10    4.30
   2  -6   5   37.80    2.80
  -2  -6  -5   43.60    5.20
  -2   6  -5   37.20    2.80
  -2   6  -5   35.60    4.20
   2   6   5   21.10    3.70
  -2   6  -5   36.20    5.20
   2   6   5   30.50    3.40
   2   6   5   29.80    4.30
   3  -6   5  264.27   11.00
   3  -6   5  274.77    9.30
  -3  -6  -5  282.37   12.00
   3  -6   5  261.37   12.60
   3   6   5  285.27    9.80
   3   6   5  266.57    9.50
  -3   6  -5  264.77    9.20
  -3   6  -5  310.27   13.20
  -3   6  -5  278.17   12.40
   4  -6   5 2003.70   54.79
  -4   6  -5 1972.20   53.89
   5  -6   5  136.99    6.20
   5  -6   5  130.29    8.90
  -5  -6  -5  144.79    8.80
  -5   6  -5  152.88    8.30
   5   6   5  135.29    5.70
  -5   6  -5  140.29    6.10
  -5   6  -5  136.99    8.70
   5   6   5  132.69    5.50
   6  -6   5  442.06   14.50
   6  -6   5  439.66   18.70
  -6  -6  -5  435.56   17.70
  -6   6  -5  454.75   14.10
   6   6   5  450.25   13.10
  -6   6  -5  441.26   14.30
   6   6   5  461.65   12.90
  -6   6  -5  449.66   16.90
  -7  -6  -5   83.59    7.20
   7  -6   5   67.59    8.20
   7   6   5   88.09    3.80
  -7   6  -5   78.29    7.00
  -7   6  -5   98.89    7.10
   7   6   5   77.79    3.70
  -7   6  -5   85.79    5.00
  -7   6  -5   82.09    5.10
  -8  -6  -5   -1.00    1.40
   8   6   5    2.40    0.70
  -8   6  -5    2.10    1.30
  -8   6  -5    2.40    1.60
  -8   6  -5    2.40    2.00
  -8   6  -5    3.00    1.90
   8   6   5    3.30    0.90
  -9  -6  -5    5.20    2.80
  -9   6  -5    9.40    3.20
  -9   6  -5    6.20    1.90
   9   6   5    6.70    0.70
  -9   6  -5    2.30    1.50
  -9   6  -5    9.00    3.20
 -10  -6  -5    5.10    2.80
 -10   6  -5    0.10    1.00
 -11  -6  -5   25.20    5.60
 -11   6  -5   25.60    5.30
 -11   6  -5   26.30    4.40
 -12  -6  -5   69.09    9.20
 -12   6  -5   97.39    8.20
 -12   6  -5   94.09    7.20
 -13  -6  -5   32.60    6.90
 -13   6  -5   27.40    4.80
 -13   6  -5   43.00    7.10
 -14  -6  -5   74.29   11.20
 -14   6  -5   71.49    8.50
 -14   6  -5   75.29    8.20
 -13  -7   5   22.40    5.80
 -13   7   5   17.00    4.60
 -13   7   5   16.90    4.60
 -12  -7   5   45.30    7.90
 -12   7   5   43.50    7.00
 -12   7   5   53.49    7.60
 -11  -7   5    2.20    2.20
 -11   7   5    0.40    1.70
 -11   7   5    0.60    1.30
 -11   7   5   -1.80    1.10
  10  -7  -5  181.38   12.90
 -10  -7   5  176.48   12.20
 -10   7   5  203.78   12.00
 -10   7   5  204.78   11.80
 -10   7   5  191.08   12.20
  -9  -7   5   26.40    5.40
   9  -7  -5   31.80    5.60
   9  -7  -5   15.00    4.10
  -9   7   5   23.00    4.40
  -9   7   5   22.60    4.60
  -8  -7   5  358.66   17.00
   8  -7  -5  374.06   18.30
   8  -7  -5  380.96   16.20
  -8   7   5  343.37   16.60
  -8   7   5  395.26   16.50
   7  -7  -5  136.49    8.70
  -7  -7   5  159.28   10.10
   7  -7  -5  150.28   10.60
  -7   7   5  142.19    9.80
  -7   7   5  137.79    8.90
   6  -7  -5  192.18   10.20
   6  -7  -5  184.88   11.80
  -6  -7   5  234.58   11.70
  -6   7   5  201.88   11.50
   6   7  -5  204.58   11.90
  -6   7   5  203.68   10.60
   5  -7  -5  110.59    7.20
   5  -7  -5   92.19    8.00
  -5  -7   5  109.29    7.40
  -5  -7   5   94.69    3.50
  -5   7   5   83.19    7.20
   5   7  -5   98.89    3.50
   5   7  -5  103.49    8.00
  -5   7   5   99.49    7.00
  -4  -7   5  199.48    7.00
   4  -7  -5  192.38    9.80
   4  -7  -5  205.68   12.00
  -4  -7   5  225.58   10.60
  -4   7   5  228.88   10.60
   4   7  -5  203.78   11.30
  -4   7   5  202.98   11.20
   4   7  -5  210.28    7.10
   3  -7  -5   60.39    5.10
  -3  -7   5   53.89    6.30
  -3  -7   5   58.49    3.60
   3  -7  -5   53.59    6.50
   3   7  -5   55.59    6.00
   3   7  -5   56.09    3.60
  -3   7   5   62.69    7.40
  -3   7   5   67.19    7.40
  -3   7   5   57.89    6.10
   3   7  -5   99.29   11.90
   2  -7  -5  682.73   21.80
  -2  -7   5  659.83   19.30
  -2  -7   5  672.83   20.90
   2  -7  -5  681.93   24.80
  -2   7   5  642.74   21.50
   2   7  -5  650.83   23.00
   2   7  -5  689.03   21.60
   2   7  -5  679.43   19.50
  -2   7   5  668.73   21.40
  -2   7   5  703.93   24.10
   1  -7  -5   11.10    2.50
  -1  -7   5   12.70    2.50
  -1  -7   5   13.10    2.40
   1  -7  -5    7.00    2.50
  -1   7   5   18.60    4.20
   1   7  -5   12.10    2.50
  -1   7   5   11.70    2.80
   1   7  -5   13.30    3.50
   1   7  -5   12.80    2.40
   0  -7  -5  573.84   19.50
   0  -7  -5  569.44   18.50
   0  -7   5  579.54   17.80
   0  -7   5  602.44   19.70
   0   7  -5  599.74   18.50
   0   7  -5  589.24   21.00
   0   7   5  580.64   18.60
   0   7  -5  569.94   18.20
  -1  -7  -5   21.50    3.70
  -1  -7  -5   26.90    4.00
   1  -7   5   18.60    3.00
   1  -7   5   21.30    3.00
   1   7   5   22.00    3.20
  -1   7  -5   23.70    4.50
  -1   7  -5   23.60    3.30
  -1   7  -5   19.00    3.20
   1   7   5   17.00    3.80
  -2  -7  -5  316.97   11.50
  -2  -7  -5  321.37   13.30
   2  -7   5  320.37   11.00
  -2   7  -5  306.57   11.10
   2   7   5  331.47   15.40
  -2   7  -5  317.77   12.60
   2   7   5  309.67   11.40
  -2   7  -5  332.97   14.40
  -3  -7  -5  411.26   15.90
   3  -7   5  384.26   12.70
  -3  -7  -5  389.16   13.10
   3   7   5  400.96   17.80
  -3   7  -5  384.26   12.90
  -3   7  -5  414.36   16.70
  -3   7  -5  406.66   15.10
   3   7   5  401.86   13.10
   3   7   5  400.76   13.20
   4  -7   5   77.09    4.50
  -4  -7  -5   70.39    6.10
  -4   7  -5   72.79    4.40
   4   7   5   70.19    4.20
   4   7   5   70.59    4.30
  -4   7  -5   68.19    5.60
  -4   7  -5   74.99    6.60
   5  -7   5  163.98    7.20
  -5  -7  -5  166.78    9.80
  -5   7  -5  151.08    6.80
   5   7   5  159.68    6.40
   5   7   5  153.18    6.50
  -5   7  -5  151.38    8.90
  -5   7  -5  171.38   10.30
   6  -7   5  367.26   12.70
  -6  -7  -5  335.87   15.70
  -6   7  -5  336.87   15.90
  -6   7  -5  379.36   15.40
   6   7   5  355.26   10.90
   6   7   5  358.66   11.10
  -6   7  -5  346.27   12.10
  -7  -7  -5  186.68   11.30
  -7   7  -5  187.18    8.50
  -7   7  -5  196.58   11.80
  -7   7  -5  189.38   10.60
  -7   7  -5  188.68    8.20
   7   7   5  194.08    6.70
   7   7   5  190.38    6.50
  -8  -7  -5   97.49   10.00
  -8   7  -5   86.89    7.40
   8   7   5   98.39    3.40
  -8   7  -5   99.09    8.50
  -8   7  -5   97.69    6.10
  -9  -7  -5    6.50    3.20
  -9   7  -5    6.60    3.10
  -9   7  -5    6.00    2.00
  -9   7  -5    3.90    1.60
 -10  -7  -5   10.30    3.90
 -10   7  -5    6.30    3.00
 -10   7  -5    7.90    3.30
 -10   7  -5    6.90    2.30
 -11  -7  -5   -2.50    1.30
 -11   7  -5    4.70    2.60
 -11   7  -5    3.00    1.80
 -12  -7  -5    1.60    2.40
 -12   7  -5    5.00    2.30
 -12   7  -5    2.10    2.40
 -13  -7  -5   21.90    7.20
 -13   7  -5   27.00    5.80
 -13   7  -5   23.90    4.70
 -13  -8   5   70.99   10.30
 -13   8   5   64.39   10.30
 -13   8   5   78.69    9.80
 -12  -8   5    2.60    2.50
 -12   8   5    1.40    2.00
 -12   8   5    1.30    2.00
 -11  -8   5   42.40    7.50
 -11   8   5   45.60    7.10
 -11   8   5   38.50    7.00
 -11   8   5   38.50    7.00
  10  -8  -5    2.00    2.10
 -10  -8   5   -0.50    1.80
 -10   8   5    0.60    1.60
 -10   8   5   -0.80    1.40
 -10   8   5    1.20    1.50
   9  -8  -5   -0.40    1.60
   9  -8  -5    1.00    1.70
  -9  -8   5    1.90    2.40
  -9   8   5   -0.90    1.50
  -9   8   5    0.90    1.90
  -8  -8   5   52.79    7.60
   8  -8  -5   65.49    9.50
   8  -8  -5   41.40    6.00
  -8   8   5   57.79    8.00
  -8   8   5   49.90    7.40
   8   8  -5   49.10    7.60
   7  -8  -5   12.30    4.10
  -7  -8   5    4.70    2.60
   7  -8  -5   16.10    3.80
   7   8  -5   10.80    3.90
  -7   8   5    3.20    2.20
  -7   8   5   11.40    3.50
  -6  -8   5    3.30    2.30
   6  -8  -5    6.10    3.10
   6  -8  -5    1.30    1.80
  -6   8   5    3.90    2.20
   6   8  -5    5.00    2.40
  -6   8   5    2.80    2.00
  -5  -8   5   38.90    5.70
   5  -8  -5   35.10    6.60
   5  -8  -5   29.10    4.70
   5   8  -5   28.80    5.20
   5   8  -5   28.10    2.00
  -5   8   5   24.60    4.40
  -5   8   5   29.20    5.60
  -4  -8   5    3.50    1.20
   4  -8  -5    0.10    1.50
   4  -8  -5    3.90    2.10
  -4  -8   5    2.70    2.00
  -4   8   5    6.10    2.40
   4   8  -5    7.40    3.00
  -4   8   5   11.80    3.60
   4   8  -5    3.50    1.20
   3  -8  -5    5.90    3.00
  -3  -8   5    5.30    1.60
   3  -8  -5    5.50    2.30
  -3  -8   5    1.80    1.60
  -3   8   5    6.00    2.20
   3   8  -5    1.30    1.90
   3   8  -5    4.00    1.60
  -3   8   5    1.90    1.90
   2  -8  -5    9.20    2.80
  -2  -8   5    6.40    2.10
  -2  -8   5    5.20    1.70
  -2   8   5    5.00    2.20
  -2   8   5    5.50    2.90
   2   8  -5    6.00    2.10
   2   8  -5    2.20    1.90
   2   8  -5    5.00    1.70
   1  -8  -5  111.59    7.30
  -1  -8   5  105.59    6.40
  -1  -8   5   97.59    5.90
   1   8  -5  105.09    6.10
  -1   8   5  102.29    6.70
   1   8  -5   98.69    6.60
   1   8  -5   93.59    7.60
  -1   8   5  121.19    8.90
   0  -8   5    8.10    2.20
   0  -8  -5    9.40    2.80
   0  -8   5   13.00    2.60
   0   8   5   11.00    3.40
   0   8  -5    8.10    2.60
   0   8   5   11.10    2.60
   1  -8   5  119.89    6.50
  -1  -8  -5  125.79    6.90
  -1  -8  -5  121.49    7.90
  -1   8  -5  133.89    7.50
   1   8   5  111.59    8.80
  -1   8  -5  129.29    6.90
  -1   8  -5  114.79    9.60
   2  -8   5   78.59    5.00
  -2  -8  -5   72.49    5.00
  -2  -8  -5   79.99    6.40
  -2   8  -5   90.29    9.20
   2   8   5   66.29    4.90
  -2   8  -5   80.39    5.20
  -2   8  -5   73.09    5.90
   2   8   5   76.49    8.70
   3  -8   5  118.69    6.20
  -3  -8  -5  111.79    7.90
  -3   8  -5  109.69    8.40
   3   8   5  128.89    7.30
  -3   8  -5  113.39    6.20
   3   8   5  126.09    9.70
   3   8   5  126.79    6.50
  -3   8  -5  127.49    7.90
   4  -8   5   89.89    5.40
  -4  -8  -5  105.99    7.70
  -4   8  -5  103.29    8.30
   4   8   5   99.79    5.30
  -4   8  -5  100.89    7.20
   4   8   5   99.29    8.90
  -4   8  -5   89.09    5.40
   4   8   5   99.19    5.50
  -5  -8  -5    1.20    1.80
   5  -8   5   -0.30    0.80
  -5   8  -5    2.80    2.30
   5   8   5    1.70    1.00
  -5   8  -5    1.00    1.60
  -5   8  -5    1.50    1.20
   5   8   5    1.20    0.90
  -6  -8  -5  133.19    9.40
   6  -8   5  124.99    6.70
  -6   8  -5  123.69    6.40
   6   8   5  114.09    5.30
  -6   8  -5  117.79    8.40
  -6   8  -5  118.79   12.80
   6   8   5  122.39    5.60
  -7  -8  -5  175.88   11.50
   7  -8   5  185.28    8.70
  -7   8  -5  172.78   11.50
  -7   8  -5  193.68    8.70
   7   8   5  168.88    6.20
  -7   8  -5  179.28   10.70
   7   8   5  176.18    6.40
  -7   8  -5  169.78   10.10
  -8  -8  -5    1.90    2.40
  -8   8  -5    0.50    1.90
  -8   8  -5    3.30    1.70
  -8   8  -5    3.00    2.60
  -8   8  -5    2.80    1.30
  -9  -8  -5   60.39    8.30
  -9   8  -5   34.30    6.10
  -9   8  -5   48.50    7.10
  -9   8  -5   54.49    4.50
 -10  -8  -5    1.20    2.30
 -10   8  -5    1.30    2.20
 -10   8  -5   -0.30    1.20
 -10   8  -5    1.40    1.40
 -11  -8  -5   61.09    8.70
 -11   8  -5   65.29    8.50
 -11   8  -5   64.69    5.60
 -12  -8  -5   39.40    7.40
 -12   8  -5   54.29    6.40
 -12   8  -5   36.60    6.30
 -12  -9   5   79.89   10.60
 -12   9   5   77.89    9.30
 -12   9   5   67.59    8.90
 -11  -9   5   -0.70    1.80
 -11   9   5    2.60    1.90
 -11   9   5    1.00    2.10
  11   9  -5    0.70    2.00
 -11   9   5    0.80    2.60
 -10  -9   5   74.89    9.90
  10  -9  -5   77.49    9.20
 -10   9   5   62.29    9.20
 -10   9   5   73.09    8.90
  10   9  -5   46.60    7.90
  -9  -9   5    0.90    2.10
   9  -9  -5    5.20    2.80
  -9   9   5    3.30    2.70
  -9   9   5    2.40    2.10
   9   9  -5    2.50    2.80
   8  -9  -5    0.00    1.30
   8  -9  -5   -0.10    1.70
  -8  -9   5   -2.40    1.30
  -8   9   5   -1.20    1.30
  -8   9   5    1.20    1.80
   8   9  -5    1.60    2.10
   7  -9  -5   14.70    3.90
   7  -9  -5   10.60    4.00
  -7  -9   5    8.30    3.10
   7   9  -5    9.00    3.70
  -7   9   5   10.80    3.40
  -7   9   5    9.90    3.80
   6  -9  -5    6.40    2.40
   6  -9  -5    4.00    2.90
  -6  -9   5   10.30    3.40
  -6   9   5    7.60    3.30
   6   9  -5    6.00    3.10
  -6   9   5    8.30    3.40
   5  -9  -5    2.10    2.50
  -5  -9   5    1.50    1.90
   5  -9  -5   -1.30    1.20
  -5  -9   5   -0.30    0.80
  -5   9   5    0.10    1.40
   5   9  -5    0.00    1.70
   5   9  -5    0.60    0.70
  -5   9   5   -0.40    1.60
  -4  -9   5   86.39    4.80
  -4  -9   5   83.39    6.80
   4  -9  -5   73.19    9.60
   4  -9  -5   89.79    7.00
   4   9  -5   82.29    9.60
  -4   9   5   88.19    7.00
  -4   9   5   95.79    8.50
   4   9  -5   88.59    4.80
  -3  -9   5   62.19    6.80
   3  -9  -5   53.19    6.80
  -3  -9   5   58.99    4.20
  -3   9   5   68.49    7.30
   3   9  -5   80.29    9.60
  -3   9   5   52.89    7.00
   3   9  -5   66.49    4.60
  -2  -9   5   87.79    5.70
  -2  -9   5  106.19    7.10
   2  -9  -5  109.69    7.60
   2   9  -5  102.89    8.40
  -2   9   5  102.89    7.30
  -2   9   5  102.89    8.80
   2   9  -5   97.29    6.10
   1  -9  -5   17.10    3.70
  -1  -9   5   14.70    3.00
  -1   9   5    6.20    3.10
  -1   9   5   11.90    3.00
   1   9  -5   15.10    3.00
   1   9  -5   12.20    3.40
   0  -9   5    1.30    1.50
   0  -9  -5    0.50    1.50
   0   9   5    5.30    2.80
   0   9  -5    1.80    1.30
   0   9  -5   -0.30    1.20
   0   9  -5    3.70    2.20
   0   9   5    4.40    2.00
   1  -9   5   43.80    4.80
  -1  -9  -5   39.60    5.50
  -1   9  -5   38.70    6.70
   1   9   5   41.00    5.20
  -1   9  -5   38.10    4.80
   1   9   5   37.30    6.40
  -1   9  -5   41.10    5.20
   2  -9   5    2.20    1.40
  -2  -9  -5    0.80    1.60
  -2   9  -5    2.60    1.90
   2   9   5    1.40    1.50
  -2   9  -5    1.30    1.20
   2   9   5    0.40    1.50
  -2   9  -5    2.20    2.10
  -3  -9  -5   39.80    5.70
  -3  -9  -5   29.60    3.90
   3  -9   5   30.60    3.90
   3   9   5   36.30    7.40
   3   9   5   30.70    6.10
  -3   9  -5   41.20    6.80
  -3   9  -5   33.80    4.60
  -3   9  -5   23.40    4.50
  -4  -9  -5    6.10    2.80
   4  -9   5    9.00    2.40
  -4   9  -5   10.40    3.20
   4   9   5   14.70    2.70
   4   9   5   12.70    2.40
  -4   9  -5    9.50    3.00
   4   9   5   11.90    4.00
   5  -9   5  193.18    8.70
  -5  -9  -5  178.18   11.20
   5   9   5  189.98    8.10
  -5   9  -5  194.68   11.00
   5   9   5  163.48    7.40
   5   9   5  148.79   11.90
  -5   9  -5  178.28   11.90
   6  -9   5    4.50    1.70
   6   9   5    3.40    2.90
   6   9   5    4.30    1.40
  -6   9  -5    4.20    1.80
   6   9   5    8.00    1.70
  -6   9  -5    4.70    2.60
   7  -9   5    2.30    1.50
  -7  -9  -5    2.50    2.30
   7   9   5    0.20    0.70
  -7   9  -5    1.60    1.30
  -7   9  -5    0.40    1.60
  -7   9  -5    1.20    1.90
   7   9   5    1.60    0.80
  -8  -9  -5   31.60    6.10
  -8   9  -5   33.70    4.90
  -8   9  -5   31.00    3.90
  -8   9  -5   58.69    7.80
  -8   9  -5   24.30    5.50
  -9  -9  -5   25.70    5.60
  -9   9  -5   18.90    4.60
  -9   9  -5   38.50    6.80
  -9   9  -5   21.30    3.50
 -10  -9  -5    4.80    3.00
 -10   9  -5    1.30    2.20
 -10   9  -5    5.70    3.10
 -10   9  -5    7.40    2.40
 -11  -9  -5   71.69   10.70
 -11   9  -5   73.89    9.40
 -11   9  -5   52.49    8.50
 -11   9  -5   60.79    6.40
 -11 -10   5   42.60    7.90
  11  10  -5   40.00    8.20
 -11  10   5   43.90    7.20
  10 -10  -5    0.40    1.70
 -10 -10   5    2.70    2.60
  10  10  -5   -1.40    1.00
 -10  10   5    0.60    1.80
 -10  10   5    2.60    2.60
  -9 -10   5   63.29    8.70
   9 -10  -5   51.39    7.30
  -9  10   5   57.59    8.90
  -9  10   5   48.80    7.50
   9  10  -5   44.60    8.40
  -8 -10   5   14.60    4.40
   8 -10  -5   14.60    4.20
   8  10  -5    6.20    3.00
  -8  10   5   15.00    4.20
  -8  10   5   11.90    4.20
   7 -10  -5   10.50    3.50
  -7 -10   5   10.80    3.60
  -7  10   5    3.10    2.10
   7  10  -5   11.90    4.40
  -7  10   5    5.90    2.90
   6 -10  -5   13.10    3.50
  -6  10   5   22.60    5.10
   6  10  -5    6.60    3.30
  -6  10   5    9.70    4.10
  -5 -10   5   -0.60    0.60
   5 -10  -5    1.20    1.70
  -5 -10   5    1.10    1.70
   5  10  -5    0.30    0.70
   5  10  -5   -0.10    1.80
  -5  10   5   -1.20    1.10
  -5  10   5    4.30    2.80
  -4 -10   5   66.89    7.50
   4 -10  -5   83.49    7.10
  -4 -10   5   73.69    4.70
  -4  10   5   64.89    7.40
   4  10  -5   75.09    4.70
  -4  10   5   82.39    9.80
   4  10  -5   73.99    9.50
  -3 -10   5   96.79    5.90
  -3 -10   5  100.09    7.50
   3 -10  -5   80.79    7.10
  -3  10   5  112.89    8.10
   3  10  -5   99.39    6.00
  -3  10   5  109.19    9.60
   3  10  -5   77.19    8.80
   2 -10  -5    0.40    1.70
  -2 -10   5   -1.00    1.10
   2  10  -5    0.90    1.40
  -2  10   5    1.50    1.90
  -2  10   5    3.20    2.20
   2  10  -5   -0.50    1.40
  -1 -10   5  142.09    8.40
   1 -10  -5  141.69    9.30
   1  10  -5  162.18    8.60
  -1  10   5  131.99   10.70
   1  10  -5  141.39   10.60
  -1  10   5  141.49    8.80
   0 -10   5    0.70    1.30
   0 -10  -5    5.60    2.60
   0  10   5    5.80    2.50
   0  10  -5    3.30    2.30
   0  10  -5    4.10    2.20
   0  10   5    5.10    2.90
  -1 -10  -5   31.70    5.50
   1 -10   5   30.40    4.20
  -1  10  -5   41.70    5.80
   1  10   5   45.30    9.00
  -1  10  -5   25.90    5.30
   1  10   5   41.20    5.40
   2 -10   5    6.00    2.10
  -2 -10  -5    9.40    3.20
  -2  10  -5    6.60    3.10
   2  10   5    7.70    2.30
  -2  10  -5    7.70    2.90
   2  10   5    7.50    3.40
   3 -10   5   21.40    3.50
  -3 -10  -5   20.40    4.50
   3  10   5   22.60    3.60
  -3  10  -5   20.40    4.20
   3  10   5   29.50    6.90
  -3  10  -5   19.70    3.70
  -3  10  -5   17.40    4.90
   4 -10   5   48.10    6.10
   4  10   5   56.99    9.30
  -4  10  -5   44.30    6.40
  -4  10  -5   56.99    5.80
  -4  10  -5   53.59    7.40
   4  10   5   46.60    5.00
   5 -10   5  107.99   11.60
  -5 -10  -5   82.09    9.20
   5  10   5  103.19    5.90
  -5  10  -5   98.29    8.10
  -5  10  -5  103.19   11.90
  -5  10  -5   88.59    6.00
   5  10   5  122.49   14.20
   5  10   5   96.99    5.60
   6 -10   5    1.10    1.30
  -6 -10  -5   -0.70    1.60
   6  10   5    2.40    1.20
  -6  10  -5   -0.80    1.50
   6  10   5   -0.30    1.50
  -6  10  -5    2.20    2.40
   6  10   5    3.10    1.40
  -6  10  -5    1.70    1.30
   7 -10   5   75.49    5.60
  -7 -10  -5   71.89    9.10
   7  10   5   49.00    9.10
   7  10   5   70.29    3.60
  -7  10  -5   64.49    8.60
  -7  10  -5   70.29    8.30
  -8 -10  -5    9.00    3.90
  -8  10  -5   12.50    4.10
   8  10   5   10.10    4.30
  -8  10  -5   10.30    3.80
  -8  10  -5   12.70    2.80
  -9 -10  -5   29.10    6.40
  -9  10  -5   27.20    5.50
  -9  10  -5   30.70    6.70
  -9  10  -5   26.50    3.90
   9  10   5   27.00    7.20
 -10  10  -5   -0.10    1.20
 -10  10  -5   -0.20    1.60
  -9 -11   5   10.90    4.00
   9 -11  -5   16.40    4.60
  -9  11   5   28.90    8.50
   9  11  -5   14.00    4.80
  -9  11   5   14.30    4.50
  -8 -11   5   56.69    8.10
   8 -11  -5   51.99    7.20
  -8  11   5   58.69    9.70
   8  11  -5   51.39    9.00
  -8  11   5   61.99    8.90
   7 -11  -5   -0.40    1.40
  -7 -11   5    0.10    1.80
   7  11  -5   -0.40    1.80
  -7  11   5    2.50    2.20
  -7  11   5    0.50    1.90
  -6 -11   5    0.30    2.00
  -6  11   5   -3.00    0.90
   6  11  -5   -0.30    1.70
  -6  11   5    0.50    1.90
   5 -11  -5   20.30    4.60
  -5 -11   5   14.80    4.20
   5  11  -5   19.60    5.50
   5  11  -5   16.00    2.30
  -5  11   5   17.90    4.60
  -5  11   5   21.50    6.00
  -4 -11   5   21.80    4.60
   4 -11  -5   18.60    4.30
  -4  11   5   20.20    5.40
   4  11  -5   20.80    3.10
  -4  11   5   17.40    4.10
   4  11  -5   22.50    5.80
   3 -11  -5   24.80    4.80
  -3 -11   5   28.50    5.00
   3  11  -5   26.50    3.80
  -3  11   5   38.30    7.50
  -3  11   5   33.30    5.40
   3  11  -5   30.10    6.30
   2 -11  -5   -0.20    1.60
  -2 -11   5   -1.20    1.10
   2  11  -5    3.50    2.80
   2  11  -5    1.60    1.60
  -2  11   5    4.90    3.00
  -2  11   5    6.10    2.60
   1 -11  -5    9.30    3.50
  -1 -11   5   10.20    3.00
  -1  11   5    8.00    3.10
  -1  11   5   13.20    4.60
   1  11  -5    9.80    2.90
   1  11  -5    9.10    3.40
   0 -11   5  224.68   11.20
   0 -11  -5  216.88   12.50
   0  11   5  246.58   12.10
   0  11   5  234.18   15.10
   0  11  -5  223.78   11.40
   0  11  -5  199.28   13.50
   1 -11   5    0.90    1.30
  -1  11  -5    2.50    2.40
   1  11   5    1.20    1.90
  -1  11  -5    0.30    1.70
   1  11   5   -1.60    1.20
   2 -11   5   46.00    5.60
  -2 -11  -5   33.30    6.10
   2  11   5   26.10    5.80
  -2  11  -5   34.60    5.40
  -2  11  -5   29.90    6.20
   2  11   5   30.20    4.70
   3 -11   5    4.70    2.00
  -3 -11  -5    1.40    2.10
   3  11   5    2.30    2.50
  -3  11  -5    7.70    3.20
  -3  11  -5    4.10    2.90
   3  11   5    4.70    2.10
  -4 -11  -5   34.50    6.20
   4 -11   5   46.70    5.40
   4  11   5   47.20    8.50
  -4  11  -5   49.20    7.20
  -4  11  -5   35.00    7.00
   4  11   5   32.30    4.40
  -5 -11  -5    4.30    3.20
   5 -11   5    4.00    1.70
  -5  11  -5    4.60    3.00
   5  11   5    0.60    1.10
  -5  11  -5    1.30    2.40
   5  11   5    7.30    3.20
  -6 -11  -5   20.30    5.10
   6 -11   5   21.80    3.70
   6  11   5   22.70    6.10
  -6  11  -5   29.00    6.60
   6  11   5   27.20    3.30
  -6  11  -5   30.70    6.00
   7 -11   5   17.30    3.30
  -7 -11  -5   22.20    5.50
  -7  11  -5   29.20    6.20
   7  11   5   26.10    8.30
  -7  11  -5   35.60    7.30
  -8 -11  -5   91.39   11.20
  -8  11  -5   82.89   10.30
  -8  11  -5   78.19    5.90
   8  11   5   82.29   12.70
  -8  11  -5   85.59   10.30
  -9 -11  -5   -0.80    2.20
  -9  11  -5    2.10    2.50
  -9  11  -5    2.20    3.00
   9  11   5    4.30    2.90
   7 -12  -5    1.60    2.20
  -7 -12   5    2.50    2.50
   7  12  -5    2.30    3.00
  -7  12   5    2.30    2.30
   6 -12  -5    2.30    2.20
  -6 -12   5    2.80    2.80
  -6  12   5    1.80    2.00
   6  12  -5   -0.40    1.90
  -6  12   5    4.20    3.10
   5 -12  -5  131.49    9.90
  -5 -12   5  122.49    9.70
  -5  12   5  135.69   10.20
   5  12  -5  128.19    5.90
   5  12  -5  131.49   11.50
  -5  12   5  128.59   11.70
  -4 -12   5    4.90    2.70
   4 -12  -5    3.70    2.30
   4  12  -5    4.50    3.10
  -4  12   5   -0.40    1.60
  -4  12   5    6.60    3.70
   4  12  -5    2.70    1.40
  -3 -12   5   26.00    4.90
   3 -12  -5   35.60    5.90
   3  12  -5   26.90    6.20
   3  12  -5   31.20    4.40
  -3  12   5   23.80    4.70
  -3  12   5   32.20    7.30
   2 -12  -5   59.19    7.80
  -2 -12   5   45.10    6.40
  -2  12   5   55.49    7.40
   2  12  -5   41.40    7.80
  -2  12   5   44.60    7.90
   2  12  -5   51.29    6.00
  -1 -12   5   22.20    4.30
   1 -12  -5   17.80    4.30
  -1  12   5   27.60    5.10
   1  12  -5   27.10    4.60
  -1  12   5   16.70    4.70
   0 -12   5    1.80    1.90
   0 -12  -5    0.30    1.90
   0  12  -5    5.20    3.40
   0  12  -5    0.30    1.60
   0  12   5    0.30    1.90
   1 -12   5    1.30    1.70
  -1 -12  -5    0.90    2.00
  -1  12  -5    1.60    2.50
  -1  12  -5   -1.40    1.40
   1  12   5    1.10    2.10
   1  12   5   -0.30    1.40
   2 -12   5   15.20    3.50
  -2 -12  -5   14.70    4.30
  -2  12  -5   13.00    4.70
  -2  12  -5   13.80    3.60
   2  12   5   13.00    5.20
   2  12   5   13.80    3.40
   3 -12   5   72.89    5.90
  -3 -12  -5   60.39    8.30
   3  12   5   58.29    9.40
   3  12   5   56.59    6.20
  -3  12  -5   51.59    7.40
  -3  12  -5   60.99    9.50
   4 -12   5    3.00    1.60
  -4 -12  -5    0.60    1.60
  -4  12  -5   -0.70    1.40
   4  12   5    1.30    1.50
  -4  12  -5    2.60    2.60
   4  12   5   -2.20    1.40
  -5 -12  -5   19.80    4.90
   5 -12   5   24.00    4.10
   5  12   5   20.00    3.50
  -5  12  -5   26.30    5.40
   5  12   5   19.70    6.30
  -5  12  -5   19.50    6.10
  -6 -12  -5   -1.10    1.20
   6 -12   5    1.20    1.40
  -6  12  -5    0.90    1.90
   6  12   5    0.90    2.10
  -7 -12  -5   19.90    7.20
   7  12   5   33.00    7.50
  -7  12  -5   42.70    8.90
  -7  12  -5   46.10    8.70
  -4 -13   5    6.60    3.10
   4 -13  -5    8.10    3.20
   4  13  -5   15.40    5.20
  -4  13   5   10.50    3.70
  -4  13   5    5.70    3.60
   3 -13  -5   -0.70    1.20
  -3 -13   5    0.80    1.60
   3  13  -5    0.20    1.90
  -3  13   5    5.50    3.30
  -3  13   5    2.70    2.40
   3  13  -5    0.70    1.50
  -2 -13   5   30.70    5.60
   2 -13  -5   34.40    6.20
   2  13  -5   24.30    5.90
  -2  13   5   26.00    5.20
   2  13  -5   28.40    4.70
  -2  13   5   21.10    5.70
   1 -13  -5   70.69    8.60
  -1 -13   5   61.19    7.40
  -1  13   5   78.79   11.40
   1  13  -5   63.79   10.10
  -1  13   5   75.29    8.80
   0 -13  -5   -1.40    1.50
   0  13  -5    1.50    2.30
   0  13  -5    2.90    1.90
   0  13   5    5.30    2.50
   0  13   5    2.10    2.60
   1 -13   5   82.49    6.90
  -1 -13  -5   83.89    9.60
  -1  13  -5   86.09    9.20
   1  13   5   84.59   11.50
   1  13   5   79.19    8.50
  -1  13  -5   74.39   10.80
  -2 -13  -5    0.60    2.00
   2 -13   5    3.10    2.00
  -2  13  -5    3.60    2.50
  -2  13  -5    3.00    3.00
   2  13   5    9.20    4.60
  -3 -13  -5    4.80    2.70
   3 -13   5    6.40    2.50
   3  13   5    6.30    2.50
  -3  13  -5   -0.30    2.00
   3  13   5    3.30    3.50
  -3  13  -5    3.50    2.40
   4 -13   5    9.10    2.90
  -4 -13  -5    5.00    3.30
   4  13   5    6.60    2.60
  -4  13  -5    4.30    2.80
  -4  13  -5    9.90    4.40
   4  13   5    3.50    3.10
 -16   0   6    1.70    2.10
 -16   0   6   -0.70    3.20
 -15   0   6    0.70    1.20
 -15   0   6   -1.00    1.90
 -14   0   6   27.60    6.00
 -14   0   6   28.80    3.90
  14   0  -6   30.60    6.50
  13   0  -6    0.90    1.70
 -13   0   6    1.40    1.30
 -13   0   6    2.80    2.50
  12   0  -6  541.35   20.90
 -12   0   6  557.54   22.90
 -12   0   6  508.25   21.90
  12   0  -6  522.75   17.50
 -11   0   6    1.20    2.10
 -11   0   6    1.70    1.20
  11   0  -6    0.80    1.00
  11   0  -6    3.90    2.10
 -10   0   6  250.17    9.50
 -10   0   6  250.77   13.10
  10   0  -6  254.47   11.80
  10   0  -6  237.68    9.70
  -9   0   6   -0.80    0.90
  -9   0   6    0.90    0.90
   9   0  -6    2.50    1.20
   9   0  -6   -0.50    0.70
   8   0  -6  404.16   13.20
  -8   0   6  440.66   16.60
  -8   0   6  408.86   13.00
   8   0  -6  415.66   14.70
   7   0  -6    0.60    0.70
  -7   0   6    1.60    1.20
  -7   0   6    0.70    0.70
  -7   0   6   -0.30    0.70
   7   0  -6    0.20    0.60
  -6   0   6  309.67   12.30
  -6   0   6  333.07   10.10
  -6   0   6  317.97   12.20
   6   0  -6  313.27   10.00
   6   0  -6  306.87   10.80
   5   0  -6    0.60    0.50
  -5   0   6    1.30    1.00
  -5   0   6    0.10    0.70
   5   0  -6    0.30    0.50
  -5   0   6    1.00    0.60
   4   0  -6 5272.17  127.69
  -4   0   6 5129.19  127.39
  -4   0   6 5307.87  134.99
  -4   0   6 5275.67  135.59
   3   0  -6    1.50    0.60
   3   0  -6    2.20    1.00
  -3   0   6    1.30    0.80
   3   0  -6    0.90    0.50
  -3   0   6    0.80    0.50
  -2   0   6 2679.63   68.49
   2   0  -6 2712.33   72.09
  -2   0   6 2829.22   68.99
  -1   0   6    1.60    0.60
  -1   0   6    0.70    0.20
   1   0  -6    0.50    0.50
  -1   0   6    1.90    0.60
   1   0  -6    0.20    0.30
   0   0   6  918.61   27.10
   0   0  -6  990.00   26.90
   0   0  -6  936.11   27.20
   0   0   6  914.01   26.30
  -1   0  -6    1.90    0.70
  -1   0  -6    1.00    0.40
   1   0   6    0.20    0.30
   1   0   6    1.20    0.60
  -2   0  -6   96.59    4.00
  -2   0  -6   94.69    3.70
   2   0   6   96.99    4.00
   2   0   6   89.99    3.60
   3   0   6   -0.30    0.40
  -3   0  -6    0.60    0.60
  -3   0  -6    1.30    0.60
   3   0   6   -0.20    0.40
  -4   0  -6 1119.89   35.50
   4   0   6 1098.39   34.10
  -4   0  -6 1108.59   34.30
   4   0   6 1041.70   35.20
   5   0   6    0.00    0.60
   5   0   6    0.50    0.70
  -5   0  -6    1.10    0.80
  -5   0  -6   -0.50    0.50
   6   0   6 1325.37   35.20
  -7   0  -6   -0.20    0.70
   7   0   6    0.00    0.80
  -7   0  -6    1.90    1.20
   7   0   6   -0.30    0.70
   8   0   6  391.86   14.80
  -8   0  -6  398.96   14.90
   8   0   6  404.36   13.60
   8   0   6  409.56   16.00
  -8   0  -6  401.66   13.60
   9   0   6    1.00    1.20
  -9   0  -6    0.20    0.90
   9   0   6   -1.00    0.70
  -9   0  -6   -0.40    1.20
 -10   0  -6   33.90    5.10
  10   0   6   20.80    3.80
 -10   0  -6   37.60    4.40
  10   0   6   25.20    3.70
 -11   0  -6    0.40    1.00
 -11   0  -6   -1.50    1.20
  11   0   6    1.30    2.50
 -12   0  -6    3.20    1.70
 -12   0  -6    0.80    1.90
  12   0   6    4.90    2.70
 -13   0  -6    1.80    2.00
  13   0   6    1.10    1.70
 -13   0  -6   -0.80    1.10
 -14   0  -6   40.50    6.60
 -14   0  -6   41.20    5.40
 -15   0  -6   -2.50    1.00
 -15   0  -6    0.60    1.20
 -16  -1   6    5.50    4.10
 -16   1   6    5.20    3.40
 -16   1   6    5.10    2.10
 -15  -1   6   49.30    8.30
 -15  -1   6   43.40    5.30
 -15   1   6   49.80    5.70
 -15   1   6   64.29    9.20
 -14  -1   6   52.09    8.40
 -14  -1   6   52.09    3.90
 -14   1   6   59.69    6.00
 -14   1   6   39.10    7.20
  14   1  -6   48.00    6.80
 -13  -1   6  306.87   11.00
 -13  -1   6  347.67   17.70
  13   1  -6  307.97   13.70
  13   1  -6  304.47   15.20
 -13   1   6  319.07   17.00
 -13   1   6  301.77   12.60
 -12  -1   6  397.06   19.10
 -12  -1   6  412.46   13.30
 -12   1   6  415.66   15.00
 -12   1   6  422.26   19.20
  12   1  -6  426.26   17.60
  12   1  -6  392.26   13.50
 -11  -1   6    3.60    1.40
 -11  -1   6    2.50    2.20
 -11   1   6    5.30    2.70
 -11   1   6    3.60    1.70
  11   1  -6    4.90    1.50
  11   1  -6    6.50    2.40
 -10  -1   6  302.67   14.60
 -10  -1   6  280.57    9.70
  10  -1  -6  269.57   14.20
  10  -1  -6  264.87   11.20
 -10   1   6  282.77   13.90
  10   1  -6  271.67    9.80
 -10   1   6  287.47   11.10
  10   1  -6  296.77   12.70
   9  -1  -6   48.40    5.60
  -9  -1   6   44.20    3.00
  -9  -1   6   51.59    6.70
   9   1  -6   40.10    3.00
  -9   1   6   56.19    6.80
  -9   1   6   46.50    3.80
   9   1  -6   47.20    5.40
  -8  -1   6  181.78    6.50
  -8  -1   6  183.58    9.90
   8  -1  -6  164.48    8.50
   8  -1  -6  170.28    7.70
   8   1  -6  179.38    6.60
  -8   1   6  167.08    7.40
  -8   1   6  178.18    9.60
   8   1  -6  159.98    8.00
  -7  -1   6   62.79    5.20
   7  -1  -6   68.29    4.70
  -7  -1   6   61.59    5.10
   7  -1  -6   64.29    4.10
  -7  -1   6   56.89    3.10
  -7   1   6   57.19    4.80
   7   1  -6   68.19    3.40
  -7   1   6   57.89    3.90
  -7   1   6   63.99    5.20
  -6  -1   6  189.98    6.30
  -6  -1   6  207.58    9.20
  -6  -1   6  206.28    9.30
   6  -1  -6  173.08    7.30
   6  -1  -6  191.78    8.00
  -6   1   6  198.38    9.10
  -6   1   6  182.68    8.60
   6   1  -6  191.88    6.90
   6   1  -6  179.78    8.80
  -6   1   6  188.68    7.40
   5  -1  -6  760.02   21.40
  -5  -1   6  802.72   23.40
  -5  -1   6  821.92   23.40
   5   1  -6  746.93   22.90
  -5   1   6  832.32   23.20
   4   1  -6 1019.00   27.70
  -3   1   6  684.13   19.10
  -2  -1   6 1069.19   35.00
   2  -1  -6 1014.10   30.90
   2  -1  -6 1060.09   33.50
  -2  -1   6 1027.80   28.60
  -2  -1   6 1060.19   32.90
   2   1  -6 1048.10   30.00
  -2   1   6 1050.69   31.10
  -2   1   6 1024.70   32.90
  -1  -1   6 2736.63   67.89
  -1  -1   6 2849.42   69.59
   1  -1  -6 2715.13   70.99
  -1  -1   6 2727.33   68.89
  -1   1   6 2811.42   73.69
   1   1  -6 2642.94   67.79
  -1   1   6 2656.53   69.49
   0  -1   6  627.44   17.90
   0  -1   6  641.54   20.00
   0  -1  -6  657.93   21.50
   0  -1  -6  640.34   20.50
   0   1   6  619.64   21.00
   0   1  -6  639.34   18.10
   0   1   6  612.44   20.30
   0   1  -6  617.74   20.00
   1  -1   6  219.58    7.10
  -1  -1  -6  211.38    6.90
   1  -1   6  218.88    5.60
   1  -1   6  219.98    6.90
  -1  -1  -6  219.48    7.00
  -1   1  -6  222.48    7.10
   1   1   6  221.18    7.40
   1   1   6  219.18    7.00
  -1   1  -6  223.78    5.60
   2  -1   6   19.60    1.20
   2  -1   6   14.20    1.70
   2  -1   6   21.20    1.80
  -2  -1  -6   21.40    2.10
  -2  -1  -6   24.20    2.40
   2   1   6   19.90    2.30
  -2   1  -6   19.40    1.10
   2   1   6   20.70    1.70
  -2   1  -6   16.90    1.90
   3  -1   6    0.40    0.60
   3  -1   6    2.60    0.70
   3  -1   6    1.60    0.90
  -3  -1  -6    1.00    0.70
  -3  -1  -6    1.40    0.60
   3   1   6    1.40    0.60
  -3   1  -6    3.00    0.80
   3   1   6    1.30    0.70
  -3   1  -6    1.50    0.80
  -4  -1  -6  216.08    8.40
   4  -1   6  235.38    9.10
   4  -1   6  240.08    8.30
   4  -1   6  219.58    8.10
  -4  -1  -6  223.18    7.70
  -4   1  -6  240.78    8.40
   4   1   6  226.68    7.60
  -4   1  -6  224.98    7.60
   4   1   6  226.78    8.50
  -5  -1  -6  230.08    7.80
   5  -1   6  206.08    7.80
   5  -1   6  227.18    8.40
  -5  -1  -6  209.48    8.60
   5  -1   6  217.68    9.20
   5   1   6  214.68    8.80
   5   1   6  212.38    7.60
  -5   1  -6  221.88    8.40
  -5   1  -6  207.48    7.90
  -6  -1  -6   29.10    3.10
  -6  -1  -6   26.30    3.50
   6  -1   6   28.00    3.20
   6  -1   6   25.30    3.10
   6  -1   6   23.90    3.50
   6   1   6   31.80    2.60
  -6   1  -6   34.00    3.60
   6   1   6   30.70    3.80
  -6   1  -6   27.70    3.30
   7  -1   6 1757.02   46.00
   7  -1   6 1582.34   43.20
   7  -1   6 1665.53   43.20
   8  -1   6  148.39    8.00
  -8  -1  -6  173.38    7.30
   8  -1   6  151.68    9.10
  -8  -1  -6  180.18   10.40
   8  -1   6  165.38    7.80
  -8   1  -6  178.38    8.60
   8   1   6  163.68    7.20
  -8   1  -6  182.08    8.20
   8   1   6  154.88    8.60
  -9  -1  -6   66.79    5.80
   9  -1   6   55.89    5.90
   9  -1   6   45.30    5.50
   9  -1   6   63.39    5.40
  -9  -1  -6   59.89    4.20
  -9   1  -6   59.49    4.90
  -9   1  -6   54.39    5.90
  -9   1  -6   65.99    4.80
   9   1   6   63.79    4.30
 -10  -1  -6   11.90    3.50
  10  -1   6   14.30    3.10
 -10  -1  -6   11.80    2.40
 -10   1  -6   10.80    2.90
 -10   1  -6   17.10    3.30
  10   1   6   14.90    2.70
 -11  -1  -6   93.09    6.20
 -11  -1  -6   92.79    7.70
  11  -1   6   88.49    7.80
 -11   1  -6   89.79    6.30
  11   1   6  108.99    8.40
  11   1   6   98.69    5.90
 -11   1  -6   91.49    7.20
  12  -1   6    2.10    2.00
 -12  -1  -6    2.50    1.40
 -12  -1  -6    5.80    2.80
 -12   1  -6    7.30    2.50
 -12   1  -6   10.40    3.40
  12   1   6    6.20    2.80
  13  -1   6   80.79   11.70
 -13  -1  -6   66.89   10.40
 -13  -1  -6   80.49    5.60
 -13   1  -6   69.49    6.00
  13   1   6   70.69   10.50
 -13   1  -6   84.89    8.80
 -14  -1  -6    6.80    2.10
 -14  -1  -6    7.60    3.50
 -14   1  -6    3.60    2.50
 -14   1  -6    2.10    1.70
 -15  -1  -6  171.68   12.30
 -15  -1  -6  167.68    8.70
 -15   1  -6  160.48   10.80
 -15   1  -6  140.89   11.00
 -15  -2   6   10.80    4.40
 -15   2   6   10.50    4.40
 -15   2   6   13.60    3.30
 -14  -2   6   -1.00    1.70
 -14  -2   6    2.80    0.90
 -14   2   6    3.00    1.80
 -14   2   6   -0.50    1.80
  14   2  -6    3.60    2.30
  13  -2  -6    0.60    1.10
 -13  -2   6    1.90    2.40
 -13  -2   6    3.30    1.00
 -13   2   6    1.10    2.10
  13   2  -6    3.00    2.20
 -13   2   6    3.10    1.80
 -12  -2   6  231.38   15.80
 -12  -2   6  247.98    8.30
 -12   2   6  284.27   14.90
 -12   2   6  256.87   11.50
  12   2  -6  266.47   13.00
  12   2  -6  252.17    8.50
 -11  -2   6  213.28   12.60
 -11  -2   6  189.88    6.70
  11   2  -6  191.58    6.80
 -11   2   6  193.98   11.70
  11   2  -6  190.78   10.40
 -11   2   6  190.38    9.40
 -10  -2   6   37.60    2.50
 -10  -2   6   43.90    6.50
  10   2  -6   39.80    2.60
 -10   2   6   46.20    6.60
 -10   2   6   47.20    5.30
   9  -2  -6  175.08    8.80
  -9  -2   6  185.38    6.20
  -9  -2   6  206.88   11.30
   9   2  -6  188.08    8.10
  -9   2   6  205.68   10.80
  -9   2   6  200.28   10.10
  -8  -2   6  119.39    8.20
  -8  -2   6  130.79    4.70
   8  -2  -6  132.69    7.10
  -8   2   6  146.99    7.10
  -8   2   6  143.19    8.50
   8   2  -6  136.39    4.80
  -7  -2   6  185.58    6.50
   7  -2  -6  184.88    8.20
  -7  -2   6  187.98    5.70
   7   2  -6  160.88    8.90
  -7   2   6  176.68    7.90
  -7   2   6  168.38    8.60
  -7   2   6  179.48    9.20
   6  -2  -6  116.49    6.70
  -6  -2   6  106.29    6.70
   6  -2  -6  109.59    5.70
  -6  -2   6  112.79    3.70
   6  -2  -6  109.69    6.10
  -6  -2   6  113.89    3.70
  -6   2   6  110.29    5.90
  -6   2   6  107.99    6.30
  -6   2   6  105.79    5.60
   6   2  -6   88.59    6.80
  -5  -2   6    2.70    1.30
   5  -2  -6    1.60    0.90
   5  -2  -6   -0.50    0.50
  -5  -2   6    1.00    0.40
  -5  -2   6    0.50    0.30
   5  -2  -6    1.70    1.10
  -5   2   6    1.30    1.10
  -5   2   6    0.20    0.60
  -5   2   6    4.00    1.40
   5   2  -6    0.00    0.70
   4  -2  -6 1862.21   55.69
  -4  -2   6 2116.09   61.29
   4  -2  -6 1926.41   59.29
  -4  -2   6 1893.21   47.90
  -4  -2   6 1909.01   47.90
  -4   2   6 1898.91   58.49
  -4   2   6 1963.60   55.89
   4   2  -6 1932.61   59.69
  -3  -2   6 1639.14   50.79
   3  -2  -6 1687.03   51.19
   3  -2  -6 1616.44   48.10
  -3  -2   6 1645.84   42.00
  -3   2   6 1718.03   48.80
   3   2  -6 1620.34   41.90
  -3   2   6 1720.73   50.69
   3   2  -6 1689.93   50.89
   2  -2  -6  359.06   11.10
   2  -2  -6  371.36   11.50
  -2  -2   6  380.06   11.20
  -2  -2   6  352.76    9.70
   2  -2  -6  369.46   11.30
  -2   2   6  373.26   11.20
   2   2  -6  365.36   11.00
  -2   2   6  346.17   11.00
   2   2  -6  346.77    9.70
   2   2  -6  360.16   10.50
  -2   2   6  358.96   11.30
   1  -2  -6 2969.90   79.19
   1  -2  -6 2863.91   76.99
  -1  -2   6 3039.70   74.49
  -1  -2   6 3096.19   78.49
  -1   2   6 3020.60   79.09
  -1   2   6 3037.10   77.39
   1   2  -6 2967.70   75.69
   1   2  -6 2996.00   74.49
   0  -2   6    3.00    0.90
   0  -2   6    0.60    0.40
   0  -2  -6    1.70    0.80
   0  -2  -6    1.10    0.60
   0   2   6    1.30    0.70
   0   2  -6    0.40    0.50
   0   2  -6    5.00    1.00
   0   2   6    1.20    0.60
   0   2   6    0.90    0.60
   0   2  -6    0.60    0.40
   1  -2   6  514.25   14.50
   1  -2   6  521.25   14.30
   1   2   6  489.25   13.80
   1   2   6  510.85   14.60
  -1   2  -6  520.35   14.40
  -2  -2  -6    7.90    1.60
   2  -2   6    7.50    1.30
   2  -2   6    8.50    1.60
  -2  -2  -6    9.90    1.50
   2   2   6   13.30    1.70
  -2   2  -6    9.90    1.70
   2   2   6    6.90    1.50
  -2   2  -6    7.30    1.50
  -3  -2  -6   25.30    2.00
  -3  -2  -6   22.80    2.80
   3  -2   6   20.70    2.60
   3  -2   6   27.90    2.90
   3   2   6   29.50    2.00
   3   2   6   29.60    3.30
  -3   2  -6   27.40    1.60
  -3   2  -6   30.20    2.70
  -3   2  -6   31.20    2.60
  -3   2  -6   28.00    1.50
   4  -2   6 1258.17   33.90
   5  -2   6 1499.45   38.90
   6  -2   6  358.16   14.10
   6  -2   6  375.16   14.00
  -6  -2  -6  358.96   13.60
  -6  -2  -6  376.96   11.50
  -6   2  -6  386.46   12.30
   6   2   6  358.66   13.70
   6   2   6  346.27   11.20
  -6   2  -6  355.56   12.80
  -6   2  -6  383.76   12.10
   7  -2   6 2409.46   61.39
   7   2   6 2224.58   59.79
  -8  -2  -6  121.09    7.60
   8  -2   6  161.18   11.70
   8  -2   6  107.59    9.20
  -8  -2  -6   93.79    5.00
   8   2   6   94.29    4.90
  -8   2  -6   98.39    6.10
  -8   2  -6   96.99    5.90
  -8   2  -6   93.79    6.10
   9  -2   6  232.58   12.20
  -9  -2  -6  215.18    8.60
  -9  -2  -6  228.78   11.50
  -9   2  -6  252.77   10.90
   9   2   6  221.18    8.60
  -9   2  -6  206.98    9.80
  -9   2  -6  231.68   10.40
 -10  -2  -6    1.60    1.20
  10  -2   6    1.10    1.30
 -10  -2  -6    2.10    1.90
 -10   2  -6    0.20    1.10
  10   2   6    0.50    0.90
 -10   2  -6   -1.20    0.90
  11  -2   6    2.00    1.90
 -11  -2  -6    5.10    1.60
 -11  -2  -6    4.00    2.50
 -11   2  -6    4.00    2.20
  11   2   6    4.80    1.60
 -11   2  -6    2.60    1.80
 -12  -2  -6   29.80    5.60
 -12  -2  -6   35.30    4.30
  12  -2   6   35.60    6.60
  12   2   6   35.20    4.00
 -12   2  -6   33.10    5.20
 -12   2  -6   37.60    5.30
 -13  -2  -6   62.29    4.60
 -13  -2  -6   51.29    7.50
 -13   2  -6   80.09    8.80
 -13   2  -6   58.69    6.60
 -14  -2  -6   26.40    3.60
 -14  -2  -6   24.70    5.70
 -14   2  -6   26.50    5.50
 -14   2  -6   24.10    7.50
 -15  -2  -6  117.59    6.60
 -15  -2  -6  109.19   11.60
 -15   2  -6   97.69    7.80
 -15   2  -6  126.69    9.90
 -15  -3   6   40.10    7.60
 -15   3   6   49.10    6.50
 -15   3   6   46.50    7.90
 -14  -3   6   34.90    7.10
 -14   3   6   36.00    6.70
 -14   3   6   35.20    6.60
 -13  -3   6    8.30    3.80
  13  -3  -6    8.30    3.10
 -13   3   6   10.30    3.70
 -13   3   6    8.30    2.70
  13   3  -6    8.30    3.10
  12  -3  -6   42.60    6.60
 -12  -3   6   41.20    6.80
 -12   3   6   43.00    5.50
 -12   3   6   43.20    6.70
  12   3  -6   45.70    6.30
  11  -3  -6  158.78   10.30
 -11  -3   6  145.39   10.60
 -11   3   6  150.38    8.60
 -11   3   6  152.78   10.30
  10  -3  -6    6.60    2.70
 -10  -3   6    6.80    2.90
 -10   3   6    6.50    2.10
 -10   3   6    9.30    3.10
  -9  -3   6   40.50    6.00
   9  -3  -6   31.50    4.60
  -9   3   6   39.60    5.90
  -9   3   6   40.00    5.00
   8  -3  -6   37.70    4.90
  -8  -3   6   35.20    5.20
  -8   3   6   31.90    4.10
  -8   3   6   34.40    4.10
  -8   3   6   41.10    5.40
   7  -3  -6  570.94   18.50
  -7  -3   6  555.24   20.10
   7  -3  -6  558.04   21.30
  -7   3   6  577.14   18.90
  -7   3   6  571.74   18.30
  -7   3   6  568.24   19.10
   6  -3  -6    7.90    2.10
  -6  -3   6    7.90    2.30
   6  -3  -6    7.50    2.20
  -6   3   6    5.20    1.60
  -6   3   6    7.80    1.90
   6   3  -6    5.50    1.90
  -6   3   6   11.90    2.50
  -5  -3   6  651.93   21.10
   5  -3  -6  694.83   21.00
   5  -3  -6  668.43   20.20
  -5   3   6  681.43   20.50
  -5   3   6  675.83   20.40
   5   3  -6  668.03   21.00
  -5   3   6  684.53   20.10
  -4  -3   6  113.59    6.20
   4  -3  -6  115.59    6.10
   4  -3  -6  111.09    5.80
  -4  -3   6  120.49    3.50
  -4  -3   6  119.49    3.50
  -4   3   6  123.99    6.10
  -4   3   6  124.19    6.00
   4   3  -6  115.19    6.20
  -4   3   6  111.99    5.90
   3  -3  -6  889.01   24.50
   3   3  -6  882.51   24.60
  -3   3   6  913.11   24.70
   2  -3  -6   33.30    3.10
   2  -3  -6   41.20    3.00
  -2  -3   6   42.80    2.20
   2  -3  -6   40.40    3.10
  -2  -3   6   44.10    3.00
  -2   3   6   40.30    3.10
   2   3  -6   42.80    2.20
   2   3  -6   41.20    3.00
  -2   3   6   40.50    3.00
  -2   3   6   39.50    3.20
   2   3  -6   41.80    2.90
  -1  -3   6  166.98    6.00
   1  -3  -6  176.08    6.70
   1  -3  -6  163.88    6.80
  -1  -3   6  172.98    6.80
   1   3  -6  172.78    5.80
   1   3  -6  162.08    6.00
  -1   3   6  161.08    6.70
   1   3  -6  166.18    6.50
  -1   3   6  174.78    7.30
  -1   3   6  166.58    6.60
   0  -3  -6  176.18    6.80
   0  -3  -6  167.98    6.30
   0  -3   6  160.28    5.90
   0  -3   6  160.48    5.20
   0  -3   6  160.18    6.60
   0   3  -6  162.48    6.50
   0   3  -6  163.18    6.00
   0   3  -6  159.88    5.30
   0   3   6  162.18    6.30
   0   3   6  162.88    6.60
   0   3   6  156.08    7.20
  -1  -3  -6    1.40    0.90
   1  -3   6    2.90    0.50
   1  -3   6    1.20    0.70
   1  -3   6    0.40    0.60
  -1   3  -6    2.00    0.90
   1   3   6    2.30    0.80
   1   3   6    0.20    0.70
   1   3   6    2.20    0.90
  -1   3  -6    2.20    1.00
  -1   3  -6    2.30    0.50
   2  -3   6  265.47   10.00
   2  -3   6  280.77    7.10
  -2  -3  -6  269.87    9.90
   2  -3   6  276.57    9.50
   2   3   6  282.37   10.00
  -2   3  -6  281.47    7.00
  -2   3  -6  260.47    9.80
   2   3   6  278.57    8.70
  -2   3  -6  272.57    9.50
   2   3   6  267.27    8.70
   3  -3   6 1305.77   35.00
  -4  -3  -6   57.19    3.20
  -4  -3  -6   62.89    4.50
   4  -3   6   62.49    4.60
   4  -3   6   57.29    4.00
  -4   3  -6   56.49    4.30
   4   3   6   59.99    3.10
  -4   3  -6   61.49    4.20
   4   3   6   57.09    4.30
  -4   3  -6   55.69    2.70
  -5  -3  -6   52.79    4.40
   5  -3   6   61.29    4.90
  -5  -3  -6   60.09    3.30
  -5   3  -6   54.59    4.50
   5   3   6   48.00    4.20
  -5   3  -6   50.69    4.00
  -5   3  -6   56.89    3.30
   5   3   6   58.09    3.10
  -5   3  -6   51.79    3.00
  -6  -3  -6   90.09    6.20
   6  -3   6   89.09    5.60
  -6  -3  -6   81.69    4.20
   6  -3   6   82.29    6.20
   6   3   6   78.79    5.80
  -6   3  -6   84.49    4.50
  -6   3  -6   76.19    4.50
  -6   3  -6   79.59    5.50
   6   3   6   82.79    4.00
   7  -3   6   14.90    3.20
  -7  -3  -6   21.90    4.00
  -7  -3  -6   17.00    2.20
  -7   3  -6   21.40    2.90
  -7   3  -6   18.60    2.80
  -7   3  -6   16.80    3.10
   7   3   6   17.00    2.20
   8  -3   6  287.87   14.00
  -8  -3  -6  310.07   10.20
  -8  -3  -6  304.67   13.60
  -8   3  -6  311.97   12.60
  -8   3  -6  309.47   11.90
   8   3   6  308.07   10.10
  -8   3  -6  304.37   11.50
   9  -3   6   65.99    8.00
  -9  -3  -6   71.89    4.10
  -9  -3  -6   74.89    7.80
  -9   3  -6   69.69    5.60
  -9   3  -6   71.09    5.10
   9   3   6   62.29    3.90
  -9   3  -6   63.49    5.10
 -10  -3  -6    3.10    1.20
 -10  -3  -6    1.00    1.80
  10  -3   6   -0.40    0.70
 -10   3  -6    1.30    1.60
 -10   3  -6    1.30    1.40
 -10   3  -6    5.20    2.10
  10   3   6    2.30    1.10
  11  -3   6   77.69    9.10
 -11  -3  -6   95.89   10.00
 -11  -3  -6   85.09    4.90
 -11   3  -6   89.79    6.90
 -11   3  -6   84.79    6.70
  11   3   6  104.49    5.30
 -12  -3  -6   14.20    2.40
 -12   3  -6   13.00    3.30
  12   3   6   14.10    2.50
 -12   3  -6   11.00    3.20
 -13  -3  -6   25.40    3.20
 -13  -3  -6   32.50    6.30
 -13   3  -6   26.90    5.00
 -14  -3  -6   42.70    3.50
 -14  -3  -6   61.19    8.90
 -14   3  -6   35.10    5.40
 -14   3  -6   51.09    7.20
 -15  -3  -6    0.10    2.20
 -15   3  -6    3.80    2.70
 -15   3  -6   -0.50    1.30
 -15   4   6   -0.40    1.30
 -15   4   6   -0.30    1.70
 -14  -4   6   19.40    5.70
 -14   4   6   29.50    5.30
 -14   4   6   29.70    6.00
 -13  -4   6   63.89    9.10
  13  -4  -6   67.49    9.40
 -13   4   6   61.19    8.40
 -12  -4   6   45.80    7.30
  12  -4  -6   59.99    8.60
 -12   4   6   58.69    7.90
 -12   4   6   58.49    6.90
  11  -4  -6    2.40    1.70
 -11  -4   6    1.00    2.00
 -11   4   6    0.50    1.50
 -11   4   6    2.20    2.00
  10  -4  -6  184.88   11.20
 -10  -4   6  196.58   11.90
 -10   4   6  174.88    9.60
 -10   4   6  175.38   10.80
  -9  -4   6    2.60    2.20
   9  -4  -6    8.10    2.90
  -9   4   6    3.80    2.20
  -9   4   6    5.70    2.40
  -9   4   6    6.80    2.50
   8  -4  -6   33.00    4.90
   8  -4  -6   31.70    4.80
  -8  -4   6   27.00    4.70
  -8   4   6   26.00    3.70
  -8   4   6   30.60    4.40
  -7  -4   6   77.99    6.30
   7  -4  -6   67.99    5.80
   7  -4  -6   67.09    5.60
  -7   4   6   65.99    5.10
  -7   4   6   67.19    5.40
  -7   4   6   73.79    6.20
   6  -4  -6   11.30    2.60
   6  -4  -6   10.50    2.50
   6  -4  -6   13.00    2.70
  -6   4   6   13.50    3.00
  -6   4   6   19.00    3.40
   6   4  -6   11.70    2.80
  -5  -4   6  296.17   11.90
   5  -4  -6  287.47   11.50
   5  -4  -6  293.17   11.30
   5  -4  -6  276.57   11.90
  -5   4   6  273.37   10.90
   5   4  -6  244.98   12.30
  -5   4   6  291.97   11.70
   4  -4  -6   53.09    4.40
   4  -4  -6   53.79    4.50
  -4  -4   6   46.50    4.00
  -4  -4   6   50.49    2.00
   4  -4  -6   55.39    4.30
   4   4  -6   51.39    2.00
  -4   4   6   59.99    4.50
  -4   4   6   54.79    4.10
   4   4  -6   54.59    4.20
  -4   4   6   56.89    4.20
   3  -4  -6    9.90    2.10
  -3  -4   6   16.40    2.80
  -3  -4   6   14.50    1.50
   3  -4  -6   10.20    2.20
   3  -4  -6   11.50    2.30
  -3   4   6    9.60    2.10
  -3   4   6   16.20    2.90
  -3   4   6   13.60    2.40
   3   4  -6   13.40    1.60
   3   4  -6   13.30    2.70
   3   4  -6   15.30    2.60
  -2  -4   6 2625.94   71.89
   2  -4  -6 2534.15   71.99
   2  -4  -6 2535.75   73.79
   2   4  -6 2538.35   72.09
   2   4  -6 2526.65   65.49
  -2   4   6 2499.65   73.59
  -2   4   6 2604.84   72.49
  -1  -4   6   44.40    2.90
   1  -4  -6   42.80    3.40
  -1  -4   6   42.90    3.60
  -1  -4   6   36.70    2.50
   1  -4  -6   36.60    3.00
  -1   4   6   41.80    3.20
  -1   4   6   43.70    3.40
  -1   4   6   42.20    3.80
   1   4  -6   40.80    2.70
   1   4  -6   40.60    3.30
   1   4  -6   42.70    2.90
   0  -4  -6 2667.13   76.19
   0  -4   6 2625.94   70.89
   0  -4   6 2669.43   68.79
   0  -4  -6 2630.14   72.39
   0   4  -6 2711.83   71.59
   0   4   6 2678.63   76.29
   0   4   6 2692.03   72.79
   0   4  -6 2590.84   69.39
  -1  -4  -6  271.37    9.40
  -1  -4  -6  288.77   10.50
   1  -4   6  276.67   10.70
   1  -4   6  279.57    9.70
   1   4   6  290.87   10.60
   1   4   6  292.27    9.60
  -1   4  -6  280.07    8.30
  -1   4  -6  289.07    9.90
  -1   4  -6  285.37   10.60
   2  -4   6   13.70    1.40
   2  -4   6   11.30    2.00
  -2  -4  -6   13.50    2.50
   2  -4   6    8.60    1.90
  -2   4  -6   13.30    1.40
   2   4   6   11.60    1.70
  -2   4  -6   10.90    2.10
   2   4   6   12.20    1.90
   2   4   6   12.50    2.50
  -2   4  -6   10.60    2.40
  -3  -4  -6  124.19    6.60
   3  -4   6  120.99    6.10
   3  -4   6  118.89    6.80
   3  -4   6  119.99    4.30
   3   4   6  120.19    5.10
   3   4   6  121.69    6.60
  -3   4  -6  123.59    4.20
   3   4   6  114.69    5.00
  -3   4  -6  125.59    6.80
  -3   4  -6  123.09    6.20
   4  -4   6   63.29    5.00
  -4  -4  -6   57.79    4.60
   4  -4   6   54.39    4.20
   4   4   6   50.19    3.00
  -4   4  -6   56.19    2.90
   4   4   6   51.89    6.20
  -4   4  -6   53.39    2.70
   4   4   6   50.29    3.10
  -4   4  -6   51.69    4.50
  -4   4  -6   54.09    4.20
   5  -4   6   74.99    5.20
  -5  -4  -6   69.19    5.50
   5  -4   6   72.19    5.70
   5   4   6   67.29    3.60
   5   4   6   58.39    5.00
  -5   4  -6   83.29    4.00
  -5   4  -6   66.79    4.90
  -5   4  -6   69.59    5.50
  -5   4  -6   66.49    3.50
   5   4   6   66.99    3.70
   6  -4   6 1282.07   38.40
  -6  -4  -6 1326.87   37.90
  -6   4  -6 1304.27   33.70
   6   4   6 1351.16   33.20
  -6   4  -6 1346.17   34.10
  -6   4  -6 1342.07   38.00
   7  -4   6    2.60    2.00
  -7  -4  -6    5.20    1.20
  -7  -4  -6    9.20    2.60
  -7   4  -6    5.80    2.30
  -7   4  -6    5.20    1.60
   7   4   6    4.70    1.30
  -7   4  -6    9.00    2.50
   7   4   6    4.10    1.10
  -7   4  -6    5.00    1.50
   8  -4   6 1165.48   37.00
  -8  -4  -6 1195.78   30.40
  -8  -4  -6 1205.38   36.30
  -8   4  -6 1146.79   32.00
   8   4   6 1192.48   30.20
  -8   4  -6 1212.18   32.70
  -8   4  -6 1193.48   34.60
  -9  -4  -6  103.69    4.90
   9  -4   6  102.89    8.40
  -9  -4  -6   94.89    7.80
  -9   4  -6  101.69    7.20
  -9   4  -6  106.19    6.50
   9   4   6  104.69    4.80
  -9   4  -6  127.19    7.60
 -10  -4  -6   28.00    5.20
  10  -4   6   34.00    6.70
 -10  -4  -6   20.50    2.50
  10   4   6   20.50    2.50
 -10   4  -6   16.60    3.30
 -10   4  -6   21.20    4.30
 -11  -4  -6   14.00    2.10
 -11  -4  -6    5.10    3.00
 -11   4  -6    6.30    3.00
  11   4   6   14.20    2.10
 -11   4  -6   12.40    3.10
 -12  -4  -6   -0.50    1.60
 -12  -4  -6    3.50    1.10
  12   4   6    3.40    1.20
 -12   4  -6    0.60    1.70
 -13  -4  -6   11.40    4.10
 -13   4  -6   11.30    3.50
 -13   4  -6   24.20    4.80
  13   4   6   21.50    2.40
 -14  -4  -6   36.40    7.00
 -14   4  -6   33.20    5.80
 -14   4  -6   26.30    5.10
 -15  -4  -6   15.60    6.30
 -15   4  -6   11.90    3.60
 -15   4  -6   15.00    4.10
 -15  -5   6   14.70    5.10
 -15   5   6   13.80    3.80
 -15   5   6   17.90    5.00
 -14  -5   6    4.90    3.30
 -14   5   6    6.30    2.80
 -14   5   6    1.20    2.40
 -13  -5   6   78.99   10.10
 -13   5   6   69.69    8.60
 -13   5   6   57.19    7.30
 -12  -5   6  134.29   10.80
  12  -5  -6  109.99    9.90
 -12   5   6  109.99    9.40
 -12   5   6  113.49    8.40
  11  -5  -6  945.11   36.50
 -11  -5   6  969.20   33.80
 -11   5   6  947.51   32.20
 -11   5   6  901.01   30.10
 -10  -5   6   14.60    4.20
 -10   5   6   26.70    4.80
 -10   5   6   25.20    4.70
 -10   5   6   19.80    4.40
   9  -5  -6  240.98   13.80
   9  -5  -6  235.88   12.50
  -9  -5   6  252.37   13.50
  -9   5   6  262.97   13.00
  -9   5   6  253.57   12.10
  -9   5   6  273.77   13.20
   8  -5  -6    0.70    1.50
  -8  -5   6    3.00    2.10
   8  -5  -6    0.20    1.10
  -8   5   6   -0.80    0.60
  -8   5   6   -1.90    0.90
  -7  -5   6    4.90    2.30
   7  -5  -6    1.50    1.40
   7  -5  -6    2.70    2.00
  -7   5   6    4.10    2.00
  -7   5   6    2.80    1.50
   6  -5  -6   73.59    6.20
  -6  -5   6   72.39    6.00
   6  -5  -6   87.99    6.20
  -6   5   6   70.99    5.40
  -6   5   6   77.79    6.00
  -6   5   6   70.09    5.40
   5  -5  -6  198.88   10.30
  -5  -5   6  190.48    9.60
   5  -5  -6  214.38    9.70
  -5   5   6  191.28    9.20
  -5   5   6  194.88    9.80
  -5   5   6  215.38    9.50
   5   5  -6  198.88    9.80
  -4  -5   6  101.99    3.60
  -4  -5   6   96.29    6.10
   4  -5  -6   87.89    5.80
   4  -5  -6  100.19    6.80
   4  -5  -6  100.39    6.20
  -4   5   6  102.89    6.60
  -4   5   6  108.79    6.30
  -4   5   6   89.99    5.80
   4   5  -6   98.59    3.50
   4   5  -6  109.29    7.30
   4   5  -6  109.19    6.80
   3  -5  -6 2044.70   63.49
   3  -5  -6 2040.40   64.49
  -3  -5   6 2072.59   63.79
   3   5  -6 1968.30   63.79
  -3   5   6 2005.70   62.79
   3   5  -6 1981.30   53.09
  -3   5   6 2014.90   64.19
  -2  -5   6   78.39    3.80
   2  -5  -6   51.19    5.90
  -2  -5   6   74.99    4.50
   2  -5  -6   84.39    5.10
   2  -5  -6   90.09    5.40
  -2   5   6   79.69    5.70
   2   5  -6   74.59    5.20
  -2   5   6   78.29    5.00
   2   5  -6   67.59    4.50
   2   5  -6   76.79    3.80
  -2   5   6   71.89    4.80
   1  -5  -6  561.54   17.80
   1  -5  -6  563.14   17.30
  -1  -5   6  576.94   16.50
  -1  -5   6  570.14   16.10
   1   5  -6  555.44   16.70
  -1   5   6  558.14   17.70
   1   5  -6  558.84   16.10
  -1   5   6  556.14   17.30
   1   5  -6  560.04   18.20
   0  -5  -6   78.09    5.00
   0  -5   6   71.79    4.20
   0  -5  -6   77.39    4.60
   0  -5   6   74.99    3.90
   0  -5   6   71.59    6.00
   0   5  -6   78.59    5.30
   0   5   6   79.09    5.80
   0   5  -6   73.59    4.00
   0   5   6   77.99    4.70
   0   5  -6   73.79    4.30
   0   5   6   72.59    4.90
   1  -5   6  135.39    6.30
   1  -5   6  136.49    5.20
  -1  -5  -6  141.19    6.30
  -1  -5  -6  133.79    7.00
   1   5   6  139.79    8.20
  -1   5  -6  136.49    6.50
  -1   5  -6  141.29    5.50
   1   5   6  132.29    6.20
   1   5   6  141.19    7.20
  -1   5  -6  141.69    7.40
  -2  -5  -6  567.14   16.60
   2  -5   6  540.15   17.30
   2  -5   6  576.24   15.30
  -2  -5  -6  574.24   18.40
   2   5   6  549.45   19.90
  -2   5  -6  565.64   17.60
  -2   5  -6  570.74   15.40
  -2   5  -6  585.84   18.90
   2   5   6  576.54   16.60
   2   5   6  547.45   16.30
   3  -5   6   36.20    2.30
   3  -5   6   32.50    3.90
  -3  -5  -6   28.40    3.90
   3   5   6   35.80    2.80
   3   5   6   35.40    2.70
  -3   5  -6   40.80    4.70
  -3   5  -6   31.90    2.20
  -3   5  -6   34.90    4.10
   3   5   6   31.80    4.20
   4  -5   6  207.28   10.50
   4  -5   6  215.28    7.20
   4  -5   6  203.78    9.30
  -4   5  -6  219.98    8.30
  -4   5  -6  206.38   10.10
   4   5   6  196.98    9.80
   4   5   6  209.98    7.70
   4   5   6  201.58    7.40
  -5  -5  -6 1107.79   32.30
   5  -5   6 1035.00   32.80
   5   5   6 1062.49   27.90
  -5   5  -6 1073.19   27.60
  -5   5  -6 1125.99   31.50
  -5   5  -6 1077.39   28.00
   5   5   6 1084.39   27.80
  -5   5  -6 1096.59   32.40
   6  -5   6    2.40    2.10
  -6  -5  -6    2.00    1.60
   6   5   6    3.60    1.10
  -6   5  -6    2.40    1.50
  -6   5  -6    5.10    1.30
   6   5   6    2.90    1.00
  -6   5  -6    2.90    1.50
  -6   5  -6    2.40    1.10
   7  -5   6   67.69    7.80
  -7  -5  -6   55.39    6.60
   7   5   6   49.99    3.00
   7   5   6   53.29    3.20
[truncated: 1,015,768 more chars]
